# Supplementary material for: Dual Role of Entamoeba histolytica KERP2 in Regulating Gene Expression and Modulating Host Cell Function for Intestinal Colonization
Source: Research Square preprint supplement (doi:10.21203/rs.3.rs-6191032/v1), 2025-04-28
Supplement: Supplementary file 1 [file 07a1774299b2bde936732f6b.xlsx]

## Sheet: Trial 1
Table S6. ChIP-seq for E. histolytica expressing HA-KERP2
Trial 1
chr	start	end	length	pileup	-LOG10(pvalue)	fold_enrichment	-LOG10(qvalue)	name
chr24	214722	218488	3767	837.05	259.684	3.89131	257.367	.//_peak_1704
chr7	240041	243810	3770	1401.34	415.719	3.83472	412.985	.//_peak_2649
chr16	104182	108136	3955	862.69	257.121	3.77761	254.801	.//_peak_1039
chr10	247691	248373	683	954.97	305.137	3.75466	302.787	.//_peak_226
chr9	653672	654242	571	604.07	176.079	3.59598	174.063	.//_peak_2960
chr7	320098	320660	563	589.52	166.166	3.52377	164.18	.//_peak_2662
chr18	201592	205307	3716	803.27	212.909	3.49358	210.699	.//_peak_1220
chr9	193331	194043	713	592.81	178.22	3.493	176.264	.//_peak_2892
chr9	265851	266418	568	581.01	162.835	3.48835	160.869	.//_peak_2905
chr11	251943	252564	622	742.7	216.354	3.4734	214.24	.//_peak_392
chr16	136548	137123	576	580.98	161.923	3.47297	159.96	.//_peak_1041
chr9	633297	633863	567	598.77	162.447	3.40395	160.476	.//_peak_2957
chr12	837867	841202	3336	566.98	142.546	3.38125	140.604	.//_peak_604
chr10	450225	450950	726	597.38	170.196	3.37873	168.249	.//_peak_254
chr8	499068	504015	4948	854.79	208.382	3.37735	206.157	.//_peak_2815
chr13	833046	833757	712	559.14	157.279	3.35723	155.383	.//_peak_745
chr10	74769	75405	637	615.1	165.195	3.29505	163.238	.//_peak_203
chr6	1371258	1372072	815	598.53	151.51	3.29269	149.563	.//_peak_2592
chr4	93738	94571	834	892.07	246.989	3.21566	244.849	.//_peak_1980
chr1	742828	746232	3405	681.92	152.143	3.21234	150.122	.//_peak_61
chr10	464489	465203	715	576.46	148.451	3.15653	146.576	.//_peak_255
chr14	820406	825829	5424	805.04	191.178	3.11815	189.088	.//_peak_885
chr11	952210	952754	545	561.21	129.941	3.10021	128.078	.//_peak_490
chr18	161554	162680	1127	622.17	142.994	3.04605	141.084	.//_peak_1214
chr3	1140689	1141695	1007	767.73	169.824	3.02006	167.777	.//_peak_1882
chr16	400055	400631	577	504.7	117.55	3.01946	115.783	.//_peak_1071
chr8	721994	724870	2877	813.42	188.599	3.01789	186.551	.//_peak_2843
chr6	513378	513941	564	520.34	121.418	3.00318	119.636	.//_peak_2472
chr2	610829	611441	613	524.99	120.758	2.98104	118.976	.//_peak_1383
chr15	1909	2452	544	703.49	160.692	2.97079	158.733	.//_peak_915
chr23	136606	141043	4438	877.3	195.907	2.96307	193.825	.//_peak_1666
chr24	190530	191068	539	490.84	107.175	2.9479	105.436	.//_peak_1702
chr24	289288	290513	1226	609.46	127.604	2.94195	125.737	.//_peak_1711
chr11	1025272	1026447	1176	717.83	140.516	2.927	138.542	.//_peak_495
chr19	242596	243700	1105	630.14	127.806	2.91503	125.92	.//_peak_1290
chr24	167117	168038	922	483.38	97.4383	2.9032	95.7084	.//_peak_1699
chr1	572156	575440	3285	702.75	141.425	2.90273	139.478	.//_peak_42
chr2	1414496	1415045	550	549.26	117.118	2.89898	115.325	.//_peak_1493
chr10	46169	46873	705	659.78	151.834	2.89388	149.937	.//_peak_199
chr3	1289647	1292025	2379	575.56	120.437	2.88857	118.633	.//_peak_1901
chr23	237494	238128	635	532.32	116.484	2.86375	114.73	.//_peak_1683
chr4	1102215	1102796	582	479.76	103.465	2.85994	101.767	.//_peak_2130
chr17	276373	277625	1253	1039.07	202.468	2.85861	200.267	.//_peak_1152
chr12	649408	649897	490	496.84	102.692	2.85342	100.967	.//_peak_590
chr2	256423	257392	970	759.87	152.348	2.85215	150.367	.//_peak_1334
chr19	235735	236279	545	471.49	97.2367	2.83191	95.5506	.//_peak_1288
chr4	1413074	1413858	785	505.26	113.861	2.83078	112.145	.//_peak_2175
chr8	369242	377288	8047	582.71	130.888	2.82376	129.104	.//_peak_2804
chr23	133015	135138	2124	548.2	142.468	2.81649	140.762	.//_peak_1665
chr5	52586	54258	1673	608.17	119.776	2.81128	117.952	.//_peak_2207
chr3	1306433	1309502	3070	615.71	132.172	2.80319	130.355	.//_peak_1905
chr1	1608004	1609542	1539	474.21	103.517	2.8011	101.846	.//_peak_175
chr2	983783	988301	4519	736.47	152.73	2.80004	150.822	.//_peak_1432
chr12	83718	88177	4460	744.81	151.557	2.797	149.65	.//_peak_521
chr8	301347	302271	925	492.31	93.3225	2.79203	91.6154	.//_peak_2798
chr18	274084	275997	1914	975.39	190.45	2.78308	188.327	.//_peak_1228
chr4	1121346	1121975	630	525.67	107.33	2.77958	105.604	.//_peak_2132
chr10	736056	736590	535	587.41	118.745	2.77281	116.96	.//_peak_293
chr3	438188	441086	2899	756.71	157.989	2.76826	156.074	.//_peak_1803
chr10	1200763	1201408	646	631.78	129.829	2.75794	128.006	.//_peak_356
chr10	745248	745783	536	585.46	116.362	2.75779	114.586	.//_peak_294
chr1	1378658	1383479	4822	520.37	114.517	2.74219	112.822	.//_peak_150
chr5	67030	68745	1716	614.73	114.897	2.73663	113.089	.//_peak_2209
chr16	63329	69325	5997	720.88	134.65	2.73234	132.778	.//_peak_1036
chr8	295381	297273	1893	468.59	103.141	2.7226	101.505	.//_peak_2797
chr15	440637	445203	4567	739.86	155.636	2.72182	153.755	.//_peak_977
chr1	10038	10770	733	632.03	132.301	2.71784	130.492	.//_peak_1
chr19	259894	261436	1543	916.27	189.035	2.71278	186.99	.//_peak_1292
chr2	341293	343971	2679	880.1	170.851	2.70921	168.839	.//_peak_1346
chr13	746782	749094	2313	480.68	93.501	2.70531	91.8385	.//_peak_730
chr4	1156069	1157197	1129	724.62	137.694	2.69478	135.799	.//_peak_2138
chr12	310734	311610	877	528.51	97.6482	2.69454	95.9307	.//_peak_546
chr11	1040482	1041668	1187	671.71	115.643	2.69246	113.805	.//_peak_498
chr24	163181	163926	746	451.94	90.5779	2.68804	88.9599	.//_peak_1698
chr22	379629	380202	574	1024.4	195.987	2.68355	193.887	.//_peak_1641
chr19	64122	65212	1091	445.46	87.1189	2.67592	85.5078	.//_peak_1270
chr13	595244	597606	2363	480.25	93.6425	2.67395	91.9914	.//_peak_713
chr10	17092	17704	613	580.49	108.412	2.66688	106.655	.//_peak_195
chr13	830429	831461	1033	456.06	103.275	2.65412	101.676	.//_peak_744
chr23	191588	199910	8323	696.58	147.776	2.65206	145.955	.//_peak_1675
chr6	1396386	1397143	758	440.74	75.1307	2.64346	73.5244	.//_peak_2596
chr8	1126154	1129243	3090	788.68	148.351	2.64245	146.439	.//_peak_2872
chr12	451814	452531	718	746.02	138.717	2.64156	136.837	.//_peak_560
chr20	116748	118117	1370	867.44	188.661	2.63134	186.727	.//_peak_1532
chr1	1033813	1039967	6155	497.25	108.148	2.63106	106.528	.//_peak_103
chr5	87775	89393	1619	722.09	205.351	2.63052	203.619	.//_peak_2212
chr8	850253	851488	1236	715.37	128.818	2.63037	126.976	.//_peak_2854
chr5	1485530	1486142	613	467.31	89.1561	2.62783	87.5302	.//_peak_2403
chr9	347784	357682	9899	675.45	143.275	2.62563	141.497	.//_peak_2917
chr11	604760	609812	5053	641.84	119.899	2.62436	118.117	.//_peak_442
chr5	950713	951715	1003	556.66	104.261	2.62296	102.549	.//_peak_2331
chr24	281535	283302	1768	532.58	92.1313	2.6209	90.4395	.//_peak_1710
chr8	969163	970005	843	594.66	116.691	2.61342	114.974	.//_peak_2864
chr9	442728	445949	3222	741.14	151.823	2.60315	149.975	.//_peak_2928
chr12	587525	590466	2942	877.93	160.641	2.60189	158.67	.//_peak_582
chr7	775165	778575	3411	591.21	109.544	2.59846	107.809	.//_peak_2727
chr16	227071	227671	601	526.22	97.6222	2.59718	95.9532	.//_peak_1050
chr3	1245525	1248370	2846	516.85	95.3793	2.59573	93.7366	.//_peak_1894
chr2	57761	60448	2688	930.74	165.545	2.59285	163.543	.//_peak_1310
chr20	407838	410438	2601	1319.12	265.219	2.59259	263.031	.//_peak_1568
chr24	303118	306490	3373	835.89	151.736	2.58925	149.804	.//_peak_1713
chr17	378092	378764	673	779.06	141.874	2.58781	139.995	.//_peak_1167
chr4	1277890	1278320	431	436.68	75.99	2.58261	74.4077	.//_peak_2158
chr15	185764	186213	450	568.83	100.556	2.58054	98.8409	.//_peak_939
chr1	1579988	1580464	477	456.95	80.6462	2.58027	79.0411	.//_peak_170
chr24	234545	236139	1595	442.23	93.7276	2.57836	92.1599	.//_peak_1705
chr19	229857	233612	3756	717.55	133.278	2.57803	131.45	.//_peak_1287
chr11	1018652	1021353	2702	779.28	137.214	2.57794	135.33	.//_peak_494
chr4	1048889	1050466	1578	637.98	120.64	2.57442	118.868	.//_peak_2123
chr2	1104016	1105787	1772	581.76	97.7125	2.57321	96.0053	.//_peak_1451
chr5	82889	85267	2379	695.59	187.488	2.57148	185.776	.//_peak_2211
chr17	93154	93683	530	787.73	142.007	2.57123	140.125	.//_peak_1129
chr22	398725	399230	506	1006.09	177.343	2.56945	175.306	.//_peak_1644
chr12	941639	942457	819	461.73	94.8291	2.5683	93.237	.//_peak_613
chr3	503994	505771	1778	485	90.8245	2.56366	89.202	.//_peak_1808
chr9	214139	214819	681	512.21	82.5106	2.56074	80.8671	.//_peak_2895
chr4	1310391	1310832	442	521.63	89.3607	2.55866	87.6998	.//_peak_2162
chr6	1160283	1164493	4211	697.74	111.214	2.55439	109.424	.//_peak_2573
chr10	480273	484046	3774	924.81	161.317	2.55253	159.352	.//_peak_258
chr11	974766	977179	2414	665.34	112.415	2.55115	110.625	.//_peak_491
chr25	932	1789	858	590.81	111.461	2.54696	109.772	.//_peak_1715
chr22	285238	288147	2910	740.93	129.646	2.54309	127.808	.//_peak_1637
chr8	738802	741103	2302	456.71	80.7154	2.54193	79.1273	.//_peak_2845
chr20	425070	427635	2566	1320.29	252.957	2.53947	250.775	.//_peak_1572
chr11	152934	153741	808	555.79	105.156	2.53866	103.482	.//_peak_376
chr11	431014	431414	401	470.52	78.3387	2.53669	76.7334	.//_peak_422
chr7	282629	283185	557	721.53	127.371	2.53325	125.548	.//_peak_2656
chr4	1271112	1273953	2842	510.33	90.7844	2.53299	89.1621	.//_peak_2157
chr11	437374	437768	395	463.12	76.7841	2.53297	75.1874	.//_peak_423
chr5	1112429	1118595	6167	560.18	90.0622	2.52932	88.3831	.//_peak_2356
chr6	491872	493809	1938	584.46	100.821	2.5272	99.1177	.//_peak_2469
chr3	1068847	1071552	2706	934.34	163.599	2.52699	161.634	.//_peak_1868
chr22	98595	101139	2545	420.84	81.0391	2.52631	79.509	.//_peak_1629
chr12	640777	641261	485	489.94	82.403	2.52281	80.7818	.//_peak_588
chr7	431603	433716	2114	628.36	121.868	2.52259	120.135	.//_peak_2679
chr2	532256	535796	3541	575.99	94.638	2.51995	92.94	.//_peak_1375
chr8	942848	943672	825	631.92	117.847	2.51898	116.12	.//_peak_2863
chr11	409414	410658	1245	579.5	102.48	2.51689	100.804	.//_peak_417
chr22	255073	258036	2964	781.68	137.32	2.51041	135.464	.//_peak_1635
chr18	343964	344773	810	503.09	83.281	2.50864	81.6648	.//_peak_1237
chr2	668748	669991	1244	416.74	75.1169	2.50374	73.584	.//_peak_1390
chr6	114899	116992	2094	522.22	86.1722	2.49783	84.5425	.//_peak_2424
chr4	663339	664760	1422	567.41	86.4917	2.49721	84.8117	.//_peak_2063
chr1	1783983	1787102	3120	895.94	151.841	2.49438	149.909	.//_peak_192
chr5	366033	366747	715	508.3	81.2631	2.49285	79.6337	.//_peak_2245
chr5	1549913	1550360	448	494.48	78.985	2.48166	77.3807	.//_peak_2408
chr15	240737	241351	615	707.51	126.815	2.47995	125.04	.//_peak_945
chr9	650789	652112	1324	437.77	92.8322	2.47746	91.3024	.//_peak_2959
chr13	524781	527625	2845	582.46	96.8662	2.47328	95.1965	.//_peak_704
chr2	758689	759593	905	491.96	76.859	2.46835	75.2553	.//_peak_1400
chr4	1457443	1457985	543	753.24	126.754	2.46652	124.935	.//_peak_2184
chr21	156315	157373	1059	695.6	136.023	2.46281	134.27	.//_peak_1591
chr22	144129	146660	2532	409.31	75.212	2.45912	73.7123	.//_peak_1630
chr11	1071080	1074127	3048	552.86	94.3604	2.45541	92.7184	.//_peak_500
chr20	143489	147471	3983	718.96	134.967	2.45418	133.182	.//_peak_1536
chr3	1055010	1055453	444	516.75	80.3245	2.45176	78.7125	.//_peak_1865
chr9	733739	741751	8013	557.98	88.7093	2.44892	87.0615	.//_peak_2970
chr1	1538703	1540775	2073	430.26	90.4772	2.44728	88.9694	.//_peak_165
chr4	748575	752270	3696	805.92	125.265	2.44232	123.429	.//_peak_2075
chr8	289265	293507	4243	689.6	122.071	2.44146	120.322	.//_peak_2796
chr1	255707	256068	362	418.19	64.4677	2.44143	62.9476	.//_peak_18
chr10	960450	962950	2501	432.54	76.1693	2.43954	74.6416	.//_peak_325
chr13	963133	963624	492	451.08	71.8332	2.43895	70.2813	.//_peak_763
chr3	88867	89293	427	405.56	63.4499	2.43673	61.9459	.//_peak_1758
chr2	178572	179003	432	452.51	70.2785	2.43406	68.7258	.//_peak_1326
chr24	265551	266262	712	467.9	71.3654	2.43141	69.8042	.//_peak_1708
chr6	952988	955434	2447	495.69	96.8894	2.4282	95.327	.//_peak_2540
chr7	474980	475562	583	612.91	98.7582	2.42635	97.0704	.//_peak_2685
chr4	1179075	1179860	786	444.03	75.144	2.42478	73.6145	.//_peak_2140
chr15	353503	353950	448	666.96	102.795	2.42465	101.068	.//_peak_968
chr6	1198149	1198548	400	403.3	62.5134	2.4232	61.0161	.//_peak_2577
chr4	788188	788687	500	419.82	65.871	2.41945	64.3566	.//_peak_2081
chr5	1488961	1489494	534	521.28	83.2497	2.41937	81.6427	.//_peak_2404
chr5	790278	791709	1432	669.35	94.4586	2.4185	92.7329	.//_peak_2305
chr10	647016	647571	556	476.62	75.0276	2.41747	73.4588	.//_peak_277
chr8	328568	330922	2355	442.86	69.8882	2.41723	68.3532	.//_peak_2799
chr5	500986	501710	725	525.89	83.7624	2.41602	82.1425	.//_peak_2263
chr15	525681	526276	596	568.28	92.3952	2.41447	90.7473	.//_peak_986
chr4	470588	471118	531	483.45	77.1507	2.41322	75.5771	.//_peak_2036
chr5	816007	818542	2536	523.94	78.7533	2.41137	77.1403	.//_peak_2310
chr7	448417	450831	2415	630.23	120.759	2.40993	119.058	.//_peak_2682
chr14	748988	751535	2548	647.48	97.9775	2.409	96.2615	.//_peak_877
chr2	1296220	1299956	3737	473.72	83.3481	2.40383	81.7991	.//_peak_1481
chr3	1565621	1566031	411	413.33	61.3206	2.39893	59.8188	.//_peak_1935
chr7	327053	328665	1613	484.04	71.6517	2.39577	70.0812	.//_peak_2664
chr12	106733	109385	2653	504.72	77.4983	2.39543	75.9201	.//_peak_523
chr2	676012	678397	2386	436.24	69.5449	2.39468	68.034	.//_peak_1391
chr9	147470	147975	506	398.25	62.1317	2.39297	60.6499	.//_peak_2886
chr23	213442	216638	3197	636.04	113.797	2.39118	112.097	.//_peak_1679
chr7	695284	698802	3519	909.06	152.954	2.38756	151.073	.//_peak_2715
chr3	912045	914713	2669	871.72	118.377	2.38744	116.53	.//_peak_1848
chr11	35147	35560	414	531.92	78.9799	2.38511	77.3733	.//_peak_360
chr12	368894	370406	1513	429.75	69.895	2.38069	68.3849	.//_peak_552
chr19	354758	355244	487	396.03	60.8528	2.37962	59.3773	.//_peak_1296
chr13	311996	315103	3108	546.74	86.0607	2.3783	84.4463	.//_peak_673
chr1	1004829	1007167	2339	542.38	80.7506	2.37583	79.1437	.//_peak_99
chr16	668971	670315	1345	410.26	60.7144	2.37438	59.2251	.//_peak_1098
chr19	237760	239431	1672	487.35	69.9471	2.37369	68.3817	.//_peak_1289
chr10	826224	827714	1491	565.81	85.3219	2.37107	83.7219	.//_peak_307
chr7	821729	827397	5669	617.83	111.04	2.37102	109.39	.//_peak_2733
chr8	832747	834492	1746	638.75	112.546	2.36975	110.889	.//_peak_2853
chr9	635335	636729	1395	423.8	83.98	2.36975	82.4928	.//_peak_2958
chr4	720496	721175	680	616.57	100.562	2.36601	98.8881	.//_peak_2071
chr1	1458415	1463903	5489	576.07	87.2551	2.36398	85.6221	.//_peak_156
chr14	118430	118845	416	439.95	64.8347	2.36396	63.3159	.//_peak_796
chr1	1726803	1728193	1391	758.81	133.032	2.36326	131.276	.//_peak_184
chr16	843055	845988	2934	474.85	80.5248	2.36312	78.9821	.//_peak_1112
chr14	277441	278041	601	530.25	83.1491	2.36207	81.5493	.//_peak_819
chr11	340040	345001	4962	820.13	113.487	2.36192	111.684	.//_peak_403
chr10	931642	932100	459	492.1	72.528	2.36098	70.9692	.//_peak_322
chr3	741075	743473	2399	567.59	82.944	2.36087	81.3152	.//_peak_1835
chr12	644462	645415	954	611.05	103.067	2.35859	101.403	.//_peak_589
chr1	179195	179653	459	392.46	58.263	2.35824	56.7972	.//_peak_13
chr9	143553	144260	708	483.78	65.5109	2.3549	63.9669	.//_peak_2885
chr8	1102932	1104561	1630	443.04	67.5272	2.35353	66.0104	.//_peak_2871
chr2	237845	238402	558	394.26	60.2654	2.35304	58.7998	.//_peak_1332
chr16	560028	560462	435	415.96	60.2123	2.34938	58.723	.//_peak_1085
chr4	651778	652297	520	458.16	67.0012	2.34641	65.4705	.//_peak_2061
chr8	600579	601996	1418	677.86	94.2433	2.34574	92.5281	.//_peak_2828
chr14	570878	572595	1718	546.09	84.0744	2.34177	82.4682	.//_peak_851
chr6	1183958	1184503	546	489.63	71.9938	2.34143	70.447	.//_peak_2576
chr13	67068	67827	760	389.43	59.2176	2.34009	57.7615	.//_peak_643
chr8	452310	453891	1582	513.61	100.152	2.33978	98.5809	.//_peak_2811
chr12	41139	43034	1896	497.77	72.8495	2.33928	71.2898	.//_peak_513
chr11	366388	369187	2800	828.48	111.475	2.33858	109.783	.//_peak_407
chr6	935425	937892	2468	487.27	87.6911	2.33073	86.1683	.//_peak_2538
chr6	949505	950557	1053	387.5	58.1353	2.32849	56.6844	.//_peak_2539
chr9	324132	324668	537	452.75	66.8507	2.32793	65.3324	.//_peak_2913
chr6	1145005	1147799	2795	732.59	103.137	2.3258	101.402	.//_peak_2572
chr3	618421	618874	454	504.06	71.9823	2.32489	70.4223	.//_peak_1819
chr19	391373	392123	751	415.06	58.641	2.32395	57.1662	.//_peak_1297
chr12	96822	100251	3430	498.73	72.5285	2.32394	70.9842	.//_peak_522
chr1	1078730	1081748	3019	414.13	65.8111	2.32363	64.3349	.//_peak_109
chr15	356691	358131	1441	555.73	98.0594	2.32329	96.4707	.//_peak_969
chr22	387667	388496	830	1403.91	187.332	2.3232	185.183	.//_peak_1642
chr18	580243	580943	701	449.88	61.3692	2.32107	59.8726	.//_peak_1261
chr21	134000	134501	502	599.49	88.3234	2.31712	86.6808	.//_peak_1589
chr13	774222	775950	1729	467.75	68.1339	2.315	66.6077	.//_peak_734
chr3	1109005	1109398	394	427.22	59.3379	2.3123	57.8561	.//_peak_1875
chr4	562998	564616	1619	461.88	64.6716	2.31024	63.154	.//_peak_2053
chr16	180523	181189	667	589.78	88.4139	2.30905	86.7846	.//_peak_1044
chr5	1257765	1262584	4820	801.93	103.242	2.30567	101.475	.//_peak_2372
chr15	933787	935333	1547	410.03	68.2402	2.29985	66.7793	.//_peak_1022
chr8	554909	555652	744	462.37	62.0592	2.29973	60.5427	.//_peak_2820
chr20	302604	306879	4276	533.12	83.0033	2.29892	81.4268	.//_peak_1556
chr6	317486	318193	708	732.67	109.73	2.29701	108.007	.//_peak_2444
chr7	1268180	1270039	1860	1051.12	136.642	2.29674	134.714	.//_peak_2773
chr21	178328	179716	1389	752.02	123.785	2.29578	122.058	.//_peak_1594
chr5	998681	999747	1067	403.93	56.75	2.2953	55.2938	.//_peak_2339
chr16	614181	614615	435	945.14	125.478	2.29502	123.615	.//_peak_1094
chr13	513375	513768	394	390.84	53.5418	2.29343	52.0968	.//_peak_701
chr21	292893	296848	3956	585.93	84.1335	2.29109	82.5353	.//_peak_1604
chr1	1073132	1075304	2173	534.63	79.6029	2.28835	78.0343	.//_peak_108
chr9	210436	210977	542	380.6	55.1311	2.28715	53.7006	.//_peak_2894
chr20	271241	272710	1470	840.21	113.17	2.28582	111.377	.//_peak_1551
chr11	412189	413929	1741	546.94	72.971	2.28375	71.3914	.//_peak_418
chr13	814911	815874	964	456.34	71.3669	2.28262	69.871	.//_peak_741
chr36	29319	29757	439	379.82	53.1398	2.28251	51.7106	.//_peak_1966
chr2	690524	691624	1101	716.32	92.9453	2.28203	91.234	.//_peak_1394
chr16	450958	453254	2297	561.01	77.5059	2.27946	75.9148	.//_peak_1075
chr16	217957	221069	3113	576.91	88.536	2.27898	86.9346	.//_peak_1048
chr7	279659	280289	631	551.93	78.7256	2.27816	77.1414	.//_peak_2655
chr1	588921	589387	467	441.56	60.9444	2.27807	59.4559	.//_peak_44
chr18	538274	538734	461	494.47	67.4333	2.27263	65.9046	.//_peak_1254
chr8	991869	992275	407	378	51.7453	2.27156	50.3213	.//_peak_2866
chr12	206609	207022	414	379.82	51.6417	2.27131	50.2155	.//_peak_534
chr1	1177361	1181494	4134	493.47	73.7854	2.26977	72.2581	.//_peak_120
chr10	357723	358451	729	638.94	86.3909	2.26882	84.7411	.//_peak_241
chr4	88420	90972	2553	579.59	120.334	2.26869	118.787	.//_peak_1979
chr2	440200	440634	435	382.98	51.9945	2.26802	50.5667	.//_peak_1362
chr13	767454	767900	447	377.35	50.7877	2.2677	49.3652	.//_peak_733
chr21	283560	283920	361	494.69	65.6583	2.26735	64.1279	.//_peak_1602
chr6	1125654	1126470	817	491.95	68.0313	2.26603	66.4986	.//_peak_2567
chr3	20760	21286	527	614.57	84.9881	2.26478	83.372	.//_peak_1747
chr19	509194	510747	1554	463.73	65.2558	2.26185	63.7487	.//_peak_1301
chr4	833082	833601	520	455.61	63.8524	2.25909	62.3555	.//_peak_2088
chr1	534782	535466	685	476.46	64.3223	2.25784	62.8076	.//_peak_39
chr4	882192	889589	7398	390.71	56.496	2.25623	55.0671	.//_peak_2096
chr13	835923	837071	1149	622.8	82.0971	2.25565	80.4817	.//_peak_746
chr17	146671	148220	1550	930.33	131.437	2.25518	129.61	.//_peak_1136
chr11	44797	50259	5463	680.19	93.0906	2.25474	91.4354	.//_peak_361
chr6	816195	818796	2602	477.22	71.1438	2.25429	69.6303	.//_peak_2523
chr15	212627	213370	744	560.4	78.304	2.25352	76.7201	.//_peak_942
chr10	700193	701331	1139	477.8	64.2365	2.25257	62.7287	.//_peak_283
chr4	345830	347815	1986	459.38	64.3447	2.2513	62.8507	.//_peak_2016
chr10	509933	511037	1105	536.08	67.5399	2.25114	65.9807	.//_peak_261
chr15	963914	965772	1859	548.31	71.4346	2.25041	69.871	.//_peak_1027
chr7	197762	198206	445	801.73	105.904	2.24772	104.161	.//_peak_2642
chr3	786197	787646	1450	373.97	68.9888	2.24744	67.595	.//_peak_1839
chr4	658912	659783	872	632.25	87.3885	2.24565	85.7532	.//_peak_2062
chr1	1779566	1780914	1349	799.21	107.462	2.24554	105.716	.//_peak_191
chr9	953320	954612	1293	611.72	88.0654	2.24424	86.4656	.//_peak_3002
chr1	341329	342084	756	617.66	74.4159	2.24238	72.8161	.//_peak_23
chr14	283692	284638	947	565.78	79.9561	2.24232	78.3703	.//_peak_820
chr17	422318	428312	5995	844.94	109.765	2.24191	108.01	.//_peak_1172
chr5	209940	211192	1253	489.81	66.7577	2.24181	65.2427	.//_peak_2227
chr11	128933	129356	424	536.68	70.6586	2.24172	69.1053	.//_peak_372
chr9	1123142	1126104	2963	649.14	81.8177	2.24099	80.1853	.//_peak_3023
chr7	1247235	1249483	2249	1014.39	128.16	2.24056	126.284	.//_peak_2771
chr1	1091515	1094640	3126	435.67	63.6801	2.23938	62.2303	.//_peak_110
chr4	541613	542077	465	457.2	61.0708	2.23651	59.5807	.//_peak_2048
chr8	701857	702622	766	535.36	76.8094	2.23604	75.2509	.//_peak_2839
chr1	1315022	1318116	3095	396.55	59.3737	2.23464	57.947	.//_peak_140
chr15	348988	349531	544	654.44	86.484	2.23372	84.8425	.//_peak_966
chr11	402160	405576	3417	535.32	78.6002	2.23267	77.0506	.//_peak_416
chr12	713914	714584	671	389.15	50.2343	2.23211	48.8108	.//_peak_598
chr4	1001423	1004103	2681	608.89	79.5873	2.23082	77.9762	.//_peak_2114
chr2	27650	28268	619	394.58	52.1143	2.22877	50.6865	.//_peak_1306
chr20	494143	497946	3804	464.67	67.0223	2.22873	65.5275	.//_peak_1581
chr10	110974	111388	415	466.91	59.3601	2.22647	57.8734	.//_peak_206
chr10	721496	722216	721	376.46	54.8405	2.22627	53.4348	.//_peak_289
chr13	572069	572619	551	417.17	55.5212	2.22553	54.0763	.//_peak_711
chr10	28360	29001	642	519.09	68.2389	2.2252	66.7122	.//_peak_198
chr9	655636	657387	1752	478.51	62.1537	2.22484	60.6506	.//_peak_2961
chr11	800780	807865	7086	613.44	91.5328	2.22343	89.9408	.//_peak_468
chr35	6663	7096	434	369.63	46.5763	2.22141	45.176	.//_peak_1960
chr4	23904	25161	1258	488.51	59.2226	2.22095	57.7181	.//_peak_1972
chr4	479511	480110	600	541.12	70.7596	2.21938	69.2068	.//_peak_2038
chr9	101342	102206	865	443.78	74.0932	2.21811	72.6242	.//_peak_2882
chr6	569299	574711	5413	492.44	69.263	2.21791	67.7636	.//_peak_2481
chr7	1162070	1162710	641	430.61	61.3744	2.21291	59.9257	.//_peak_2762
chr23	232170	233101	932	722.27	97.4157	2.21169	95.7277	.//_peak_1681
chr15	58767	59857	1091	559.44	75.7755	2.2114	74.2181	.//_peak_927
chr11	562954	571998	9045	439.4	61.2276	2.2108	59.7709	.//_peak_439
chr11	374559	374986	428	565.25	71.4422	2.21016	69.878	.//_peak_409
chr2	1055072	1063383	8312	530.63	88.0641	2.20621	86.5507	.//_peak_1441
chr7	571776	572272	497	462.71	57.798	2.20473	56.3163	.//_peak_2700
chr7	740945	744362	3418	434.92	58.139	2.20472	56.6858	.//_peak_2721
chr8	564327	564955	629	418.73	53.8263	2.20436	52.3841	.//_peak_2822
chr7	358244	362033	3790	488.87	72.8782	2.20315	71.3927	.//_peak_2669
chr17	755470	757008	1539	463.29	60.4464	2.20272	58.9687	.//_peak_1194
chr1	302330	303944	1615	433.19	57.5725	2.2011	56.1161	.//_peak_21
chr5	11882	25012	13131	478.11	99.8908	2.20079	98.477	.//_peak_2204
chr4	891121	893570	2450	448.6	60.1171	2.2006	58.6471	.//_peak_2097
chr2	499319	501091	1773	652.63	79.8784	2.19792	78.2579	.//_peak_1370
chr3	599216	600789	1574	508.99	74.469	2.19716	72.9607	.//_peak_1816
chr6	273108	279838	6731	437.41	55.8947	2.19624	54.4581	.//_peak_2439
chr13	388335	392510	4176	468.24	69.0998	2.19571	67.6444	.//_peak_685
chr11	753467	754265	799	661.8	83.3086	2.1956	81.676	.//_peak_461
chr3	1121758	1122296	539	428.48	56.2968	2.19436	54.854	.//_peak_1878
chr4	1369946	1370421	476	404.39	51.1068	2.19402	49.6826	.//_peak_2169
chr1	1277673	1279382	1710	644.83	84.571	2.19243	82.9478	.//_peak_133
chr14	60728	62429	1702	469.9	62.8942	2.19188	61.4104	.//_peak_788
chr11	267895	268268	374	424.8	52.4401	2.19178	50.9991	.//_peak_395
chr5	454992	456259	1268	598.38	81.4834	2.19103	79.9109	.//_peak_2259
chr7	321999	323815	1817	456.41	58.0935	2.19101	56.6223	.//_peak_2663
chr22	404967	406086	1120	1346.62	169.643	2.19083	167.615	.//_peak_1646
chr9	895628	900876	5249	681.17	87.0916	2.18929	85.4518	.//_peak_2992
chr5	833082	837016	3935	462.67	61.0975	2.18887	59.6462	.//_peak_2315
chr13	355655	357487	1833	452.3	60.9361	2.18864	59.4705	.//_peak_680
chr3	1036257	1038071	1815	379.65	54.4593	2.18863	53.0629	.//_peak_1862
chr3	1095246	1097664	2419	698.11	84.5041	2.18832	82.8653	.//_peak_1874
chr24	144927	145608	682	434.18	51.5288	2.18808	50.087	.//_peak_1694
chr18	190576	191327	752	478.9	56.4837	2.18763	55.0019	.//_peak_1218
chr4	1454458	1455065	608	556	71.4192	2.18659	69.8689	.//_peak_2183
chr15	977321	977972	652	385.66	48.0604	2.18622	46.6547	.//_peak_1029
chr8	194728	195199	472	525.76	66.8658	2.18582	65.3452	.//_peak_2788
chr21	182831	183333	503	586.31	74.2709	2.18432	72.7047	.//_peak_1595
chr6	1225998	1228542	2545	431.48	60.9982	2.18351	59.5501	.//_peak_2579
chr4	535768	537343	1576	393.47	58.1509	2.18343	56.7411	.//_peak_2047
chr2	84862	86912	2051	562.88	68.3309	2.18163	66.7832	.//_peak_1312
chr7	315808	318365	2558	401.88	76.6799	2.18044	75.276	.//_peak_2661
chr1	1636047	1637438	1392	970.91	117.349	2.18025	115.539	.//_peak_177
chr3	974013	975508	1496	497.18	70.6787	2.17976	69.1861	.//_peak_1857
chr6	1458726	1460131	1406	578.31	67.3139	2.17971	65.7534	.//_peak_2608
chr9	262688	264433	1746	525.34	64.2214	2.17891	62.6987	.//_peak_2904
chr7	222304	227743	5440	827.17	106.641	2.17852	104.932	.//_peak_2647
chr10	581148	581679	532	420.7	54.1937	2.17821	52.7576	.//_peak_270
chr3	176181	178441	2261	605.87	70.512	2.17748	68.9347	.//_peak_1772
chr3	320468	321559	1092	411.16	47.4326	2.17666	46.0079	.//_peak_1791
chr7	689989	690518	530	469.29	57.1873	2.17522	55.7109	.//_peak_2713
chr5	80182	81537	1356	664.98	127.38	2.17451	125.77	.//_peak_2210
chr6	749255	752808	3554	471.42	57.8551	2.17358	56.3795	.//_peak_2512
chr5	1017351	1018078	728	656.97	80.127	2.17353	78.5072	.//_peak_2344
chr17	693945	694476	532	483.37	59.7061	2.173	58.2215	.//_peak_1188
chr3	1028879	1029328	450	512.27	64.3341	2.17273	62.8241	.//_peak_1859
chr2	269697	271800	2104	421.35	68.2008	2.17218	66.7698	.//_peak_1337
chr1	665742	668998	3257	369.08	45.6934	2.1692	44.3109	.//_peak_53
chr4	135676	136909	1234	493.84	68.2115	2.16857	66.721	.//_peak_1986
chr12	137154	138076	923	423.86	60.8599	2.16796	59.431	.//_peak_528
chr9	630138	631967	1830	505.69	63.5703	2.16733	62.0652	.//_peak_2956
chr2	31990	34597	2608	705	87.4971	2.16594	85.8508	.//_peak_1307
chr5	377756	378345	590	561.41	71.712	2.16379	70.1618	.//_peak_2246
chr10	168252	171324	3073	375.97	49.3464	2.16249	47.9597	.//_peak_214
chr16	617450	617813	364	359.77	43.3254	2.16232	41.9543	.//_peak_1095
chr10	299987	300682	696	459.2	53.7592	2.16164	52.2979	.//_peak_232
chr12	223533	223879	347	423.8	49.6036	2.15922	48.1808	.//_peak_537
chr11	1063501	1066423	2923	509.96	68.594	2.15642	67.0947	.//_peak_499
chr13	304597	307396	2800	546.32	69.0051	2.15471	67.4753	.//_peak_672
chr9	259551	260658	1108	619.61	77.0619	2.15415	75.4897	.//_peak_2903
chr16	15419	19876	4458	445.8	54.8371	2.15406	53.394	.//_peak_1031
chr16	586795	587476	682	522.82	64.1307	2.15293	62.6309	.//_peak_1089
chr8	615504	616926	1423	668.46	78.1357	2.1518	76.5182	.//_peak_2830
chr6	548616	550021	1406	500.1	62.125	2.15085	60.6353	.//_peak_2479
chr4	1512414	1514943	2530	427.53	60.1425	2.14883	58.7308	.//_peak_2192
chr20	91894	93906	2013	607.61	97.2922	2.14808	95.7201	.//_peak_1530
chr4	1300397	1301456	1060	551.18	62.9811	2.14657	61.4578	.//_peak_2161
chr15	4106	4771	666	745.23	91.8804	2.14634	90.2143	.//_peak_916
chr1	857587	861074	3488	461.03	56.346	2.14452	54.8929	.//_peak_77
chr6	1048853	1053856	5004	439.12	53.6966	2.14421	52.2617	.//_peak_2556
chr4	813809	814161	353	366	42.9445	2.1439	41.5728	.//_peak_2085
chr2	652758	654312	1555	355.91	58.0882	2.13913	56.7404	.//_peak_1389
chr4	755017	755774	758	422.76	48.5542	2.13911	47.134	.//_peak_2076
chr2	1150459	1153757	3299	525.24	68.7376	2.13881	67.2386	.//_peak_1459
chr9	570609	571854	1246	567.37	67.4237	2.13849	65.8899	.//_peak_2947
chr20	34008	34552	545	666.13	78.2735	2.13627	76.6686	.//_peak_1522
chr12	415469	416050	582	448.28	56.8917	2.13567	55.4494	.//_peak_557
chr14	74292	74861	570	423.45	49.7559	2.13543	48.3335	.//_peak_790
chr1	1737778	1738294	517	611.89	71.9089	2.13464	70.349	.//_peak_187
chr9	1153989	1155095	1107	591.52	69.8787	2.13441	68.3311	.//_peak_3027
chr9	203576	206537	2962	521.22	57.7958	2.13303	56.3069	.//_peak_2893
chr7	733539	736341	2803	588.92	73.0985	2.1318	71.5458	.//_peak_2720
chr19	313274	313694	421	354.67	41.8572	2.13173	40.5012	.//_peak_1293
chr4	993418	996801	3384	444.82	55.3398	2.13167	53.9027	.//_peak_2113
chr4	815685	817212	1528	470.47	62.8694	2.13159	61.4113	.//_peak_2086
chr10	584838	585757	920	399.76	46.4769	2.13112	45.0847	.//_peak_271
chr15	708485	711559	3075	987.86	111.45	2.13019	109.652	.//_peak_1003
chr14	20161	21816	1656	592.81	66.8222	2.12989	65.273	.//_peak_784
chr29	34601	35473	873	787	90.4706	2.12981	88.7869	.//_peak_1744
chr4	146248	146629	382	427.47	48.6748	2.12766	47.2577	.//_peak_1989
chr9	755491	758117	2627	690.35	81.0219	2.12725	79.4065	.//_peak_2972
chr9	721263	723386	2124	549.43	59.1014	2.12667	57.5974	.//_peak_2968
chr9	224062	224504	443	404.55	47.7395	2.1263	46.3443	.//_peak_2897
chr1	894247	897011	2765	404.02	56.5822	2.12621	55.1846	.//_peak_84
chr4	1145109	1146153	1045	575.63	67.4071	2.12434	65.8749	.//_peak_2136
chr15	238515	239221	707	720.52	89.0897	2.1236	87.4503	.//_peak_944
chr10	119526	120424	899	545.46	62.7587	2.1232	61.2442	.//_peak_208
chr14	623570	625139	1570	665.13	71.0912	2.1229	69.4995	.//_peak_860
chr9	151858	154796	2939	506.82	58.9933	2.12246	57.5141	.//_peak_2887
chr3	679355	679787	433	536.79	63.1139	2.12203	61.6114	.//_peak_1827
chr9	840381	841466	1086	772.74	89.8969	2.12019	88.2359	.//_peak_2981
chr13	489652	490497	846	533.24	66.0934	2.11951	64.5849	.//_peak_697
chr16	756668	757219	552	664.32	76.1758	2.11789	74.5817	.//_peak_1107
chr3	148091	153445	5355	665.7	72.9106	2.11713	71.325	.//_peak_1766
chr13	115630	118238	2609	460.3	52.9334	2.11684	51.4879	.//_peak_647
chr6	1035991	1036895	905	583.61	65.5237	2.11662	63.9905	.//_peak_2554
chr11	692954	693645	692	654.58	74.5855	2.11419	73.0007	.//_peak_456
chr17	330707	335861	5155	642.76	80.9729	2.11371	79.4117	.//_peak_1160
chr5	57540	60076	2537	357.38	52.8095	2.11352	51.463	.//_peak_2208
chr17	410267	414624	4358	935.01	110	2.11294	108.243	.//_peak_1170
chr4	1280180	1285763	5584	563.24	66.5311	2.11187	65.0275	.//_peak_2159
chr9	964092	964991	900	596.49	68.0275	2.11139	66.4921	.//_peak_3004
chr17	776705	777051	347	351.18	39.9408	2.11085	38.5947	.//_peak_1197
chr13	191310	193209	1900	421.92	51.2748	2.11035	49.863	.//_peak_658
chr4	327273	329748	2476	497.93	60.0722	2.11009	58.5987	.//_peak_2015
chr14	518900	521448	2549	665.28	80.9091	2.10738	79.3125	.//_peak_845
chr16	118479	118849	371	350.6	40.5333	2.10732	39.1893	.//_peak_1040
chr2	14461	14875	415	351.01	39.6746	2.10646	38.3304	.//_peak_1305
chr9	182437	182755	319	350.31	39.2871	2.10536	37.943	.//_peak_2891
chr12	809183	816179	6997	353.9	46.4849	2.1046	45.1439	.//_peak_602
chr21	360934	361716	783	637.82	71.2011	2.10416	69.6339	.//_peak_1614
chr6	721789	723990	2202	349.79	40.4536	2.1025	39.1119	.//_peak_2506
chr3	1312247	1312811	565	637.41	74.7563	2.10221	73.1931	.//_peak_1906
chr5	1172049	1173224	1176	710.15	81.4009	2.10109	79.7812	.//_peak_2362
chr9	267954	270756	2803	352.62	57.3409	2.10058	56.0118	.//_peak_2906
chr6	364821	365374	554	428.68	51.759	2.09894	50.3453	.//_peak_2449
chr7	1064923	1067305	2383	348.97	41.5623	2.09759	40.2235	.//_peak_2753
chr15	51573	52420	848	563.14	61.0003	2.09749	59.4901	.//_peak_925
chr13	268864	273740	4877	454.68	47.7758	2.09741	46.3627	.//_peak_668
chr11	180176	188173	7998	586.59	73.2085	2.09736	71.6801	.//_peak_379
chr4	406889	409327	2439	484	59.4544	2.09685	57.9973	.//_peak_2027
chr10	1100159	1102601	2443	858.86	83.8764	2.09664	82.2152	.//_peak_342
chr2	161394	163509	2116	552.72	58.2325	2.09664	56.7374	.//_peak_1323
chr21	161341	165425	4085	667.3	82.7943	2.09622	81.2085	.//_peak_1593
chr9	90559	91394	836	436.69	62.9149	2.09572	61.49	.//_peak_2881
chr15	20104	20573	470	677.64	79.5117	2.09564	77.9137	.//_peak_920
chr9	320996	321726	731	467.64	52.1261	2.09563	50.6853	.//_peak_2912
chr7	528797	529169	373	412.12	45.687	2.09538	44.2922	.//_peak_2694
chr7	330867	331977	1111	752.99	87.2874	2.09379	85.6571	.//_peak_2665
chr4	1010405	1010789	385	360.17	39.9969	2.0928	38.6475	.//_peak_2116
chr15	475146	479953	4808	636.49	75.0692	2.09195	73.5255	.//_peak_980
chr4	16571	16994	424	496.09	56.4768	2.09059	55.0179	.//_peak_1971
chr1	634407	639572	5166	445.23	54.2413	2.08911	52.8349	.//_peak_48
chr2	1240342	1245926	5585	507.31	67.2477	2.08904	65.7811	.//_peak_1474
chr15	943071	943722	652	373.33	41.2201	2.08838	39.8597	.//_peak_1023
chr11	524255	527247	2993	518.81	58.5391	2.08797	57.0675	.//_peak_434
chr9	495348	496162	815	448.89	51.0783	2.08796	49.6564	.//_peak_2937
chr4	1200514	1201901	1388	449.13	52.5973	2.08784	51.1743	.//_peak_2142
chr2	821043	822202	1160	452.52	53.0003	2.08704	51.5773	.//_peak_1411
chr15	284872	285335	464	699.81	81.2426	2.08677	79.6361	.//_peak_953
chr8	65636	66011	376	369.27	41.043	2.08663	39.6885	.//_peak_2780
chr6	1501788	1502582	795	1141.54	121.254	2.08571	119.406	.//_peak_2617
chr1	584435	586850	2416	485.12	60.0636	2.0857	58.6122	.//_peak_43
chr8	747693	748465	773	586.4	67.7417	2.08508	66.2139	.//_peak_2846
chr5	400022	400500	479	348.99	39.648	2.08478	38.3131	.//_peak_2250
chr2	616160	618297	2138	474.7	57.5454	2.0836	56.1007	.//_peak_1385
chr4	1092198	1094214	2017	401.67	53.3331	2.08323	51.9503	.//_peak_2128
chr9	618419	619067	649	466.77	56.3898	2.08306	54.9618	.//_peak_2954
chr16	407955	409715	1761	442.82	51.6853	2.08299	50.2704	.//_peak_1072
chr2	52462	56064	3603	525.74	61.1745	2.08286	59.6938	.//_peak_1309
chr21	351125	351911	787	628	70.1695	2.08237	68.6161	.//_peak_1612
chr2	425075	425491	417	425.8	46.8364	2.08138	45.4385	.//_peak_1359
chr4	727518	729957	2440	519.73	60.821	2.0807	59.36	.//_peak_2072
chr17	781263	786178	4916	742.66	80.1477	2.07993	78.5564	.//_peak_1198
chr3	49022	49531	510	648.11	71.5788	2.07734	70.022	.//_peak_1752
chr22	192061	192445	385	345.57	38.9628	2.07718	37.6337	.//_peak_1633
chr3	1571269	1572766	1498	400.95	44.83	2.077	43.4504	.//_peak_1936
chr10	422350	424698	2349	574.59	64.3803	2.07662	62.8689	.//_peak_250
chr16	595295	595712	418	435.99	49.1991	2.07626	47.7904	.//_peak_1091
chr2	629694	631795	2102	371.8	41.9864	2.07585	40.6374	.//_peak_1387
chr4	630365	630728	364	395.72	42.4476	2.07486	41.08	.//_peak_2060
chr11	23486	24548	1063	573.81	60.542	2.07389	59.0376	.//_peak_358
chr18	372154	372655	502	410.78	45.4835	2.07361	44.0948	.//_peak_1242
chr13	471382	474896	3515	399.41	51.4478	2.07297	50.0707	.//_peak_694
chr12	895943	896819	877	519.29	55.5456	2.07233	54.075	.//_peak_610
chr20	165126	166208	1083	792.59	86.8027	2.07163	85.1592	.//_peak_1540
chr7	997054	997960	907	408.75	43.3604	2.07073	41.9759	.//_peak_2749
chr12	1018681	1034137	15457	478.67	66.0099	2.06847	64.5829	.//_peak_622
chr10	1857	4950	3094	358.75	42.7683	2.0676	41.4297	.//_peak_193
chr7	818234	820251	2018	454.74	51.3038	2.06609	49.8843	.//_peak_2732
chr19	256241	257388	1148	642.1	74.4644	2.06525	72.9499	.//_peak_1291
chr10	148435	148969	535	401.45	45.0013	2.06504	43.6258	.//_peak_212
chr12	215761	216096	336	411.2	43.5508	2.06494	42.173	.//_peak_535
chr10	9546	10473	928	440.93	46.5093	2.06391	45.1048	.//_peak_194
chr12	490076	490598	523	402.34	45.1161	2.06357	43.7401	.//_peak_564
chr3	1225615	1228613	2999	404.64	45.4847	2.06282	44.1098	.//_peak_1891
chr6	652641	653769	1129	515.33	53.5175	2.06095	52.0574	.//_peak_2496
chr1	136997	137367	371	353.1	37.7392	2.06047	36.4073	.//_peak_11
chr16	339043	348602	9560	464.16	56.8393	2.05929	55.4277	.//_peak_1066
chr15	741277	742952	1676	393.26	46.4871	2.05889	45.1192	.//_peak_1008
chr15	650544	652658	2115	636.66	74.112	2.05829	72.5816	.//_peak_995
chr7	105508	107167	1660	607.11	68.4377	2.05815	66.9158	.//_peak_2627
chr6	90310	92745	2436	438.26	50.3599	2.05755	48.9627	.//_peak_2420
chr5	297114	301993	4880	530.78	58.6804	2.05742	57.2124	.//_peak_2237
chr10	1006131	1007538	1408	418.92	44.1238	2.05641	42.7394	.//_peak_331
chr1	1248631	1252047	3417	460.34	54.5018	2.05593	53.0813	.//_peak_129
chr7	563552	564098	547	440.19	47.0368	2.0559	45.6313	.//_peak_2698
chr1	1357213	1357601	389	374.9	40.0501	2.05583	38.7022	.//_peak_146
chr3	1252331	1252696	366	369.33	39.6388	2.0554	38.2947	.//_peak_1895
chr14	181986	183501	1516	377.4	40.0574	2.05415	38.7113	.//_peak_805
chr23	279007	306796	27790	587.06	66.2673	2.05382	64.7597	.//_peak_1686
chr18	381948	387799	5852	596.78	69.7722	2.05234	68.2637	.//_peak_1244
chr10	20086	20514	429	450.02	50.0297	2.0515	48.6187	.//_peak_196
chr2	1094318	1096044	1727	468.04	56.75	2.0515	55.3375	.//_peak_1448
chr16	877115	878289	1175	454.48	52.9817	2.05127	51.5751	.//_peak_1114
chr23	29296	32756	3461	494.9	81.0558	2.05103	79.603	.//_peak_1653
chr13	566822	567450	629	490.82	54.5517	2.05092	53.106	.//_peak_710
chr14	654002	660811	6810	530.86	67.6568	2.04929	66.1889	.//_peak_865
chr9	799677	805534	5858	521.5	58.1292	2.04919	56.6829	.//_peak_2977
chr8	450120	450535	416	428.16	46.1247	2.04678	44.7379	.//_peak_2810
chr4	1220981	1221924	944	405.57	42.0984	2.04644	40.7287	.//_peak_2146
chr19	144014	145135	1122	346.81	35.1494	2.04643	33.8285	.//_peak_1276
chr21	354782	355474	693	344.17	34.4864	2.04625	33.1675	.//_peak_1613
chr2	573718	574813	1096	434.47	46.781	2.04507	45.3925	.//_peak_1380
chr5	120079	120492	414	582.87	58.8059	2.04502	57.3089	.//_peak_2218
chr7	469657	473012	3356	950.49	96.0142	2.04456	94.3038	.//_peak_2684
chr5	1363258	1363682	425	462.38	48.4599	2.04376	47.0522	.//_peak_2387
chr10	513088	514911	1824	449.07	49.3515	2.04308	47.9584	.//_peak_262
chr13	379338	382359	3022	412.08	47.7294	2.04237	46.3534	.//_peak_684
chr10	716504	717513	1010	452.19	45.7495	2.04232	44.3506	.//_peak_287
chr2	394541	395043	503	405.89	45.9044	2.04093	44.5329	.//_peak_1355
chr16	573751	574559	809	369.41	39.1174	2.04002	37.7791	.//_peak_1087
chr15	154223	155212	990	513.37	61.0598	2.03914	59.6036	.//_peak_935
chr10	1017985	1018429	445	498.84	53.093	2.03903	51.6525	.//_peak_332
chr3	1040245	1045693	5449	468.85	50.958	2.039	49.5453	.//_peak_1863
chr3	1406842	1410343	3502	544.76	71.7451	2.03825	70.2782	.//_peak_1918
chr5	1245050	1252186	7137	374.72	44.474	2.03782	43.1378	.//_peak_2370
chr3	1110611	1111429	819	703.49	72.8795	2.0377	71.3008	.//_peak_1876
chr17	337536	338169	634	696.8	77.5763	2.03751	76.0049	.//_peak_1161
chr2	335804	336466	663	421.11	42.1084	2.03718	40.7327	.//_peak_1345
chr15	663960	665506	1547	545.89	57.1915	2.03716	55.7218	.//_peak_998
chr22	319722	320772	1051	552.25	57.8527	2.03712	56.3788	.//_peak_1639
chr3	220448	221083	636	501.68	52.8434	2.03689	51.3995	.//_peak_1779
chr8	354017	355920	1904	454.03	48.1769	2.03672	46.7709	.//_peak_2803
chr16	689995	691755	1761	550.42	60.3587	2.036	58.88	.//_peak_1102
chr10	175946	176865	920	421.85	42.6018	2.03541	41.2236	.//_peak_215
chr2	414574	415094	521	402.66	42.3146	2.03455	40.9532	.//_peak_1357
chr16	302308	302647	340	338.15	35.6973	2.03271	34.389	.//_peak_1060
chr13	604246	605003	758	563.17	61.6096	2.03092	60.1242	.//_peak_714
chr4	184618	184945	328	350.79	36.2976	2.03088	34.9781	.//_peak_1994
chr19	222768	223118	351	337.8	35.3587	2.03063	34.0516	.//_peak_1286
chr18	181438	181845	408	418.38	43.0353	2.029	41.6625	.//_peak_1216
chr10	834151	836406	2256	451.54	48.0949	2.02836	46.7074	.//_peak_309
chr9	246817	247297	481	402.74	40.6695	2.02819	39.3084	.//_peak_2900
chr3	42352	43359	1008	658.54	66.8627	2.02685	65.3207	.//_peak_1750
chr5	1067560	1069085	1526	380.19	45.6751	2.02668	44.3319	.//_peak_2352
chr14	907045	908657	1613	545.37	56.0126	2.02649	54.5503	.//_peak_899
chr10	679016	681668	2653	461.44	51.2639	2.02608	49.8559	.//_peak_281
chr12	217780	220632	2853	408.31	42.1128	2.0256	40.7504	.//_peak_536
chr1	1009368	1011348	1981	389.48	43.6439	2.02267	42.3011	.//_peak_100
chr26	173318	176685	3368	596.37	58.288	2.02255	56.8469	.//_peak_1733
chr10	378699	379067	369	436.14	44.6126	2.02161	43.2319	.//_peak_244
chr11	440062	440435	374	575.78	58.2627	2.0216	56.7834	.//_peak_424
chr12	54306	56162	1857	429.98	46.5817	2.02159	45.1992	.//_peak_516
chr19	337011	337473	463	336.14	35.3826	2.0207	34.081	.//_peak_1295
chr17	357389	361891	4503	735.24	80.8048	2.01814	79.2235	.//_peak_1165
chr4	1399861	1400328	468	450.28	45.6783	2.01799	44.2873	.//_peak_2174
chr1	150834	151398	565	366.45	37.5301	2.01796	36.2002	.//_peak_12
chr9	761858	762440	583	389.4	40.8258	2.01744	39.4807	.//_peak_2973
chr1	1107073	1107772	700	486.89	53.0892	2.01731	51.6649	.//_peak_112
chr10	156656	157059	404	430.4	43.8939	2.0171	42.5177	.//_peak_213
chr4	490762	498389	7628	400.51	47.6114	2.01559	46.2565	.//_peak_2039
chr8	433252	433655	404	435.09	44.2829	2.01471	42.9045	.//_peak_2809
chr10	1158590	1159382	793	374.32	43.3149	2.0135	41.9788	.//_peak_351
chr10	499892	500831	940	443.81	55.637	2.01324	54.238	.//_peak_259
chr15	234139	234756	618	483.74	54.085	2.01285	52.6754	.//_peak_943
chr7	781648	782008	361	387.95	38.8027	2.01263	37.458	.//_peak_2728
chr4	232766	233696	931	420.27	41.2729	2.01255	39.9078	.//_peak_2003
chr22	1845	2190	346	334.78	33.9961	2.01251	32.6976	.//_peak_1625
chr3	655207	655568	362	517.82	51.6882	2.01171	50.2486	.//_peak_1823
chr12	1121840	1123222	1383	457.31	53.055	2.01089	51.6528	.//_peak_630
chr12	169930	170394	465	456.92	47.8629	2.01074	46.4674	.//_peak_529
chr6	384661	388410	3750	425.86	48.1089	2.01044	46.7359	.//_peak_2452
chr9	1148201	1149017	817	628.64	66.6398	2.00958	65.1192	.//_peak_3026
chr20	198339	201138	2800	990.81	139.286	2.00833	137.551	.//_peak_1545
chr2	1352316	1355006	2691	511.51	53.5467	2.00793	52.1446	.//_peak_1486
chr10	476220	478728	2509	600.62	57.284	2.00642	55.8299	.//_peak_257
chr5	1335370	1336918	1549	373.81	39.2232	2.00632	37.8913	.//_peak_2382
chr15	960329	960704	376	391	39.378	2.00564	38.0357	.//_peak_1026
chr13	927485	927850	366	392.83	39.1229	2.00461	37.7821	.//_peak_759
chr6	1357524	1358785	1262	555.23	52.3205	2.00416	50.8648	.//_peak_2591
chr15	792397	793264	868	342.95	33.0836	2.00399	31.7801	.//_peak_1014
chr1	1478283	1479246	964	442.73	43.0445	2.00287	41.6625	.//_peak_157
chr4	1361312	1361736	425	423.96	44.6752	2.00162	43.3089	.//_peak_2168
chr3	124514	128012	3499	448.15	54.8076	2.00156	53.4207	.//_peak_1762
chr9	662906	665285	2380	362.4	36.5412	2.00144	35.2287	.//_peak_2962
chr22	375459	376525	1067	581.62	59.5591	1.99917	58.0828	.//_peak_1640
chr2	1172618	1177128	4511	433.3	49.4278	1.99905	48.061	.//_peak_1463
chr15	275406	276920	1515	687.09	70.6273	1.9988	69.0781	.//_peak_951
chr10	777020	777343	324	351.49	34.4191	1.99787	33.1096	.//_peak_299
chr5	930222	935128	4907	441.71	46.6232	1.99581	45.2472	.//_peak_2329
chr1	939639	941228	1590	338.51	40.6981	1.99437	39.4072	.//_peak_91
chr23	355932	384469	28538	537.81	58.6383	1.99316	57.1896	.//_peak_1693
chr1	641930	642404	475	393.52	39.4908	1.99267	38.1492	.//_peak_49
chr11	363324	363687	364	579.81	56.884	1.99245	55.417	.//_peak_406
chr10	209108	209625	518	422.67	43.1485	1.99164	41.7926	.//_peak_221
chr3	1186677	1188115	1439	437.81	42.7516	1.99132	41.3804	.//_peak_1887
chr12	879374	879807	434	331.21	33.14	1.99116	31.8522	.//_peak_608
chr3	204249	204913	665	387.57	38.2032	1.99068	36.8714	.//_peak_1775
chr11	243786	244220	435	534.26	53.5117	1.99054	52.0665	.//_peak_389
chr21	304818	306575	1758	450.78	48.7813	1.99049	47.3969	.//_peak_1607
chr1	242265	244065	1801	380.11	45.4593	1.99022	44.1234	.//_peak_17
chr8	191542	193182	1641	340.99	39.2771	1.98989	37.9851	.//_peak_2787
chr1	57259	58306	1048	537.16	53.5602	1.98979	52.1182	.//_peak_5
chr21	121399	122075	677	512.74	51.3401	1.98888	49.9158	.//_peak_1587
chr1	881420	882437	1018	477.61	53.904	1.98877	52.4934	.//_peak_81
chr2	933797	934638	842	438.49	41.6073	1.98871	40.2371	.//_peak_1426
chr7	628205	628673	469	410.37	41.8752	1.98824	40.5239	.//_peak_2706
chr3	623258	625879	2622	518.28	58.0292	1.98805	56.5971	.//_peak_1820
chr14	178158	178714	557	428.46	42.9466	1.986	41.5809	.//_peak_804
chr4	545566	547937	2372	383.48	47.8494	1.98592	46.5216	.//_peak_2050
chr1	885212	885534	323	335.89	32.6149	1.98432	31.3242	.//_peak_82
chr4	982104	983095	992	346.33	36.282	1.9831	34.9841	.//_peak_2111
chr14	274723	275331	609	555.42	59.4652	1.98288	58.0044	.//_peak_818
chr5	900867	904328	3462	493.66	50.3743	1.98249	48.9663	.//_peak_2325
chr1	917223	919003	1781	506.58	52.0487	1.98207	50.6266	.//_peak_86
chr3	460632	461140	509	446.08	45.8148	1.982	44.4453	.//_peak_1805
chr16	672381	673404	1024	504.28	53.309	1.98194	51.8918	.//_peak_1099
chr16	532524	535516	2993	417.13	45.5861	1.98041	44.2371	.//_peak_1083
chr20	86440	88267	1828	787.25	77.8901	1.98036	76.2901	.//_peak_1529
chr12	113345	114017	673	512.56	47.9916	1.97956	46.5687	.//_peak_524
chr7	762553	762987	435	552.58	55.4835	1.9795	54.0326	.//_peak_2725
chr6	1434940	1436452	1513	450.36	48.5453	1.97815	47.1601	.//_peak_2604
chr3	690804	691611	808	667.42	63.4244	1.97801	61.9026	.//_peak_1829
chr3	684122	686798	2677	505.09	54.2388	1.97651	52.8239	.//_peak_1828
chr9	256347	256716	370	380.14	36.2121	1.97643	34.887	.//_peak_2902
chr2	418335	419796	1462	415.17	41.6797	1.97613	40.3299	.//_peak_1358
chr11	314305	317812	3508	508.07	50.1857	1.97607	48.7725	.//_peak_399
chr9	790882	795237	4356	441.17	45.4677	1.97575	44.1005	.//_peak_2976
chr17	738482	738825	344	385.1	36.9264	1.97556	35.5977	.//_peak_1191
chr6	541603	544056	2454	471.7	45.0327	1.97505	43.6432	.//_peak_2478
chr28	8703	9051	349	328.52	32.46	1.97504	31.18	.//_peak_1739
chr1	1534329	1536338	2010	340.97	37.9573	1.97399	36.6663	.//_peak_164
chr11	102624	106877	4254	695.07	75.2497	1.97359	73.7173	.//_peak_367
chr9	830913	831396	484	561.64	56.2589	1.97345	54.8033	.//_peak_2979
chr14	810112	811543	1432	551.63	65.7685	1.97249	64.3407	.//_peak_883
chr5	1065377	1065759	383	467.28	44.7705	1.9714	43.3844	.//_peak_2351
chr7	631116	632320	1205	405.02	40.7682	1.9704	39.428	.//_peak_2707
chr2	369296	370003	708	658.33	64.1955	1.97019	62.6781	.//_peak_1352
chr10	672574	673056	483	364.73	36.8264	1.97009	35.5163	.//_peak_280
chr6	69984	76844	6861	403.46	42.8612	1.96986	41.5275	.//_peak_2417
chr5	1133954	1141861	7908	639.17	62.9655	1.96974	61.4669	.//_peak_2358
chr16	719093	719993	901	332.05	35.569	1.9686	34.2911	.//_peak_1104
chr16	309470	309850	381	412.42	39.224	1.96844	37.8815	.//_peak_1061
chr6	601077	607346	6270	359.53	40.9367	1.96815	39.633	.//_peak_2488
chr9	232196	232562	367	327.34	31.4783	1.96792	30.2013	.//_peak_2898
chr4	473316	474309	994	424.4	48.1514	1.96771	46.7913	.//_peak_2037
chr10	707426	707839	414	406.74	39.521	1.96761	38.1798	.//_peak_285
chr5	250559	254444	3886	336.06	41.0388	1.96742	39.7582	.//_peak_2233
chr7	412244	416511	4268	757.04	68.5984	1.96644	67.0441	.//_peak_2676
chr21	302421	303022	602	652.4	63.3152	1.96588	61.8023	.//_peak_1606
chr3	1340203	1344406	4204	767.95	70.6334	1.96578	69.0678	.//_peak_1911
chr2	1045894	1046312	419	561.09	55.2922	1.9655	53.845	.//_peak_1438
chr2	383458	384188	731	692.62	65.7404	1.9653	64.2074	.//_peak_1353
chr9	370943	371962	1020	561.43	49.189	1.9644	47.746	.//_peak_2919
chr9	161758	162656	899	346.82	37.0971	1.96401	35.8057	.//_peak_2888
chr5	103661	108266	4606	970.7	87.236	1.96371	85.5899	.//_peak_2216
chr4	1432158	1432727	570	461.64	43.8619	1.96205	42.4834	.//_peak_2179
chr1	193734	194189	456	326.12	29.9945	1.96062	28.7211	.//_peak_14
chr24	299023	300146	1124	647.58	67.1913	1.96024	65.713	.//_peak_1712
chr11	428345	428700	356	552.49	50.9709	1.96023	49.5366	.//_peak_421
chr5	762995	765969	2975	371.07	36.467	1.96005	35.1634	.//_peak_2302
chr3	56198	56790	593	546.18	49.03	1.95889	47.5958	.//_peak_1754
chr13	1083943	1087740	3798	513.73	50.7444	1.95878	49.3497	.//_peak_782
chr6	1440905	1443083	2179	376.95	41.0356	1.95811	39.7216	.//_peak_2605
chr1	1375666	1377397	1732	417.33	38.2709	1.95692	36.9286	.//_peak_149
chr16	647679	649447	1769	537.73	51.6107	1.95632	50.183	.//_peak_1097
chr10	205877	206207	331	362.32	33.4937	1.95597	32.1904	.//_peak_220
chr2	464916	465274	359	441.93	41.3719	1.9558	40.0113	.//_peak_1365
chr18	654214	654691	478	672.21	64.1358	1.95571	62.6189	.//_peak_1266
chr10	626000	628071	2072	403.42	43.2048	1.95564	41.8651	.//_peak_276
chr10	911827	913431	1605	535.82	59.3423	1.9552	57.913	.//_peak_319
chr13	916972	918503	1532	360.85	38.0371	1.95405	36.7391	.//_peak_757
chr18	349671	350063	393	467.53	44.558	1.95374	43.1782	.//_peak_1238
chr1	648132	648939	808	325.56	33.9459	1.95351	32.6782	.//_peak_50
chr15	318564	320756	2193	529.92	51.2045	1.95277	49.7839	.//_peak_959
chr1	1185006	1188669	3664	422.26	40.9571	1.95239	39.6142	.//_peak_121
chr1	1452540	1452970	431	422.25	40.6395	1.95223	39.2944	.//_peak_155
chr9	780861	786515	5655	447.05	43.1789	1.95214	41.8192	.//_peak_2975
chr10	114292	114605	314	324.63	30.7329	1.95172	29.464	.//_peak_207
chr13	516236	518675	2440	518.41	51.67	1.95112	50.2837	.//_peak_702
chr5	658879	659231	353	343.8	32.5487	1.95104	31.2631	.//_peak_2285
chr21	334943	338350	3408	527.06	55.5226	1.9508	54.1203	.//_peak_1611
chr19	57543	57999	457	326.75	31.8673	1.95056	30.5975	.//_peak_1269
chr13	205601	209950	4350	382.11	42.9229	1.94989	41.606	.//_peak_661
chr9	1258358	1260877	2520	563.96	53.0314	1.94955	51.6052	.//_peak_3043
chr26	14949	17294	2346	359.5	35.644	1.94936	34.3465	.//_peak_1722
chr3	717991	719671	1681	420.22	37.095	1.9492	35.8049	.//_peak_1832
chr2	577017	577630	614	481.43	46.7491	1.94917	45.358	.//_peak_1381
chr3	1133862	1134411	550	348.75	32.6535	1.94879	31.3644	.//_peak_1880
chr3	1532107	1538737	6631	395.41	40.2182	1.94869	38.8962	.//_peak_1929
chr6	525623	525965	343	367.96	34.3606	1.94824	33.0575	.//_peak_2474
chr20	465378	466448	1071	614.49	55.1607	1.94814	53.6899	.//_peak_1576
chr10	968570	969008	439	377.79	35.6672	1.94788	34.3555	.//_peak_326
chr10	686356	689761	3406	391.73	42.3631	1.94668	41.0442	.//_peak_282
chr7	1018184	1018571	388	324.42	30.3385	1.94574	29.0717	.//_peak_2750
chr34	2062	22254	20193	823.83	79.0185	1.9455	77.4191	.//_peak_1959
chr5	924347	924781	435	348.51	33.4154	1.94463	32.1286	.//_peak_2327
chr10	904700	905484	785	440.55	39.5042	1.94414	38.1484	.//_peak_318
chr7	597038	599498	2461	457.93	45.9392	1.94398	44.5685	.//_peak_2702
chr5	751710	753551	1842	340.72	33.0821	1.9434	31.804	.//_peak_2300
chr13	218229	218619	391	323.18	29.9913	1.943	28.7266	.//_peak_663
chr4	568978	570104	1127	373.77	37.2574	1.94288	35.9578	.//_peak_2054
chr7	1207090	1207749	660	356.03	35.4081	1.94216	34.1198	.//_peak_2765
chr9	313143	313531	389	397.99	36.621	1.94187	35.2985	.//_peak_2910
chr14	446857	450047	3191	701.63	72.2497	1.94186	70.7411	.//_peak_833
chr2	1359344	1359683	340	356.14	32.751	1.94163	31.4591	.//_peak_1487
chr15	121373	125494	4122	333.23	31.9044	1.94158	30.6345	.//_peak_934
chr3	838729	839065	337	529.5	48.0843	1.94115	46.6732	.//_peak_1842
chr1	789331	792218	2888	439.25	44.1805	1.94014	42.8317	.//_peak_66
chr4	35213	36693	1481	429.79	39.0829	1.93986	37.7397	.//_peak_1974
chr3	578653	580182	1530	340.9	31.0632	1.93963	29.787	.//_peak_1814
chr10	400097	402331	2235	448.91	51.0964	1.93912	49.7284	.//_peak_247
chr13	936299	938170	1872	491.93	48.9071	1.93835	47.5128	.//_peak_761
chr10	1147875	1148221	347	347.32	31.929	1.93708	30.645	.//_peak_349
chr12	1155844	1156633	790	516.65	51.0556	1.93682	49.6447	.//_peak_636
chr20	296849	298867	2019	1062.64	126.427	1.93682	124.693	.//_peak_1555
chr17	302975	303738	764	680.52	65.4143	1.93662	63.9057	.//_peak_1157
chr4	743309	744940	1632	432.21	40.943	1.93621	39.5971	.//_peak_2074
chr3	216327	217391	1065	456.27	40.1784	1.93618	38.8259	.//_peak_1778
chr10	870814	874260	3447	445.23	46.9719	1.93566	45.6141	.//_peak_313
chr1	981800	984172	2373	524.44	49.0608	1.93557	47.6511	.//_peak_96
chr23	324313	327389	3077	495.13	53.0192	1.93469	51.6229	.//_peak_1689
chr10	313613	314181	569	426.5	40.085	1.93438	38.7491	.//_peak_233
chr18	412315	413200	886	542.78	48.0929	1.93388	46.6718	.//_peak_1246
chr13	246823	247323	501	372.09	35.243	1.93382	33.9403	.//_peak_667
chr1	1041460	1047889	6430	496.19	50.2512	1.93362	48.8581	.//_peak_104
chr36	22562	25137	2576	410.92	36.4895	1.93351	35.1615	.//_peak_1965
chr15	342980	343483	504	515.55	49.6126	1.93348	48.2119	.//_peak_965
chr3	1167188	1170277	3090	427.03	40.583	1.9334	39.2423	.//_peak_1885
chr7	602290	602644	355	408.55	36.6788	1.93313	35.3516	.//_peak_2703
chr3	966666	968117	1452	581.73	56.1975	1.9331	54.748	.//_peak_1856
chr16	510887	512463	1577	414.6	37.7919	1.93294	36.4623	.//_peak_1081
chr4	1230628	1232435	1808	449.37	48.2134	1.93266	46.8449	.//_peak_2150
chr3	1271875	1272351	477	422.08	38.7226	1.9322	37.3879	.//_peak_1897
chr10	934629	937694	3066	594.64	65.0938	1.93198	63.6374	.//_peak_323
chr11	979631	980052	422	358.57	33.2952	1.93163	32.0075	.//_peak_492
chr7	1085630	1086141	512	348.4	32.5247	1.93109	31.2429	.//_peak_2755
chr3	932902	935006	2105	436.08	38.2734	1.93093	36.9276	.//_peak_1852
chr16	571623	572503	881	325.16	32.9466	1.93086	31.6874	.//_peak_1086
chr14	558901	561768	2868	541.58	54.0841	1.93053	52.6841	.//_peak_850
chr11	118360	118687	328	514.41	45.6116	1.93042	44.216	.//_peak_369
chr11	351478	351932	455	446.2	40.9511	1.93009	39.6029	.//_peak_405
chr14	603492	604063	572	610.34	58.0444	1.92932	56.5796	.//_peak_857
chr4	1521678	1524471	2794	395.78	37.591	1.92912	36.2767	.//_peak_2193
chr5	976949	980490	3542	524.65	50.1607	1.92867	48.7623	.//_peak_2334
chr2	1502773	1503143	371	353.25	32.4327	1.92773	31.1469	.//_peak_1505
chr3	172548	174018	1471	447.64	41.7051	1.92753	40.3483	.//_peak_1771
chr14	738351	739600	1250	671.74	69.7641	1.92735	68.2624	.//_peak_874
chr18	646549	647429	881	621.83	58.1465	1.92728	56.7173	.//_peak_1265
chr17	111656	117842	6187	802.9	78.7042	1.92706	77.1415	.//_peak_1132
chr7	1025129	1027560	2432	350.73	33.2451	1.92694	31.9646	.//_peak_2751
chr23	340578	343679	3102	482.67	51.8222	1.92673	50.4378	.//_peak_1691
chr17	353795	354364	570	608.19	57.1783	1.92645	55.7242	.//_peak_1164
chr2	1207557	1207965	409	354.35	32.6243	1.92578	31.3419	.//_peak_1469
chr1	307386	307711	326	323.68	28.7248	1.92522	27.4658	.//_peak_22
chr10	523433	524418	986	338.73	33.3541	1.92513	32.0843	.//_peak_263
chr9	707476	710063	2588	539.9	48.6138	1.92494	47.1996	.//_peak_2967
chr18	577790	578980	1191	620.45	55.4217	1.92493	53.958	.//_peak_1260
chr13	631594	632112	519	394.09	36.8724	1.92471	35.5562	.//_peak_717
chr11	468915	469759	845	534.88	50.2118	1.92468	48.7962	.//_peak_428
chr4	878699	879225	527	362.12	33.6614	1.9241	32.3709	.//_peak_2095
chr10	726179	726737	559	462.06	43.0674	1.92393	41.7027	.//_peak_290
chr9	728077	728700	624	404.45	39.032	1.9234	37.7111	.//_peak_2969
chr14	318806	320348	1543	465.76	48.9335	1.92305	47.5627	.//_peak_823
chr2	546023	548916	2894	547.65	51.0901	1.92268	49.673	.//_peak_1377
chr7	759316	760424	1109	409.27	41.5976	1.92258	40.2748	.//_peak_2724
chr22	260494	262989	2496	758.63	70.4037	1.92245	68.8947	.//_peak_1636
chr24	309933	310570	638	319.69	31.5404	1.92209	30.2872	.//_peak_1714
chr1	1414632	1425927	11296	462.39	44.9278	1.92165	43.575	.//_peak_153
chr4	528485	531079	2595	490.34	54.4226	1.92121	53.041	.//_peak_2045
chr9	1278402	1280600	2199	375.17	39.1208	1.92119	37.8175	.//_peak_3046
chr4	851569	851898	330	377.83	33.6921	1.92104	32.3922	.//_peak_2091
chr5	1419885	1420467	583	378.89	34.1105	1.92083	32.8103	.//_peak_2396
chr8	716708	720184	3477	393.82	35.2294	1.92062	33.9202	.//_peak_2842
chr3	1553134	1553523	390	358.41	32.9484	1.92044	31.6614	.//_peak_1932
chr7	398489	399726	1238	691.44	72.801	1.91928	71.2942	.//_peak_2673
chr7	65755	66121	367	418.58	38.4665	1.9192	37.1355	.//_peak_2622
chr6	1067644	1069922	2279	478.12	50.288	1.91777	48.9304	.//_peak_2559
chr8	138401	138742	342	418.05	37.4291	1.91764	36.1005	.//_peak_2783
chr10	1050534	1051649	1116	362.96	34.879	1.91684	33.5922	.//_peak_337
chr4	446326	447712	1387	390.48	34.3536	1.91675	33.0466	.//_peak_2033
chr1	1297043	1297423	381	374.59	33.4334	1.91655	32.1365	.//_peak_136
chr4	609988	610477	490	394.68	37.3196	1.91622	36.0088	.//_peak_2058
chr13	848366	851338	2973	344.72	33.9297	1.9152	32.6582	.//_peak_748
chr3	923375	926557	3183	495.06	53.2963	1.91493	51.9216	.//_peak_1851
chr3	1319481	1320073	593	554.64	46.3338	1.91465	44.9167	.//_peak_1908
chr2	1497496	1498072	577	689.68	62.6449	1.91455	61.1391	.//_peak_1504
chr18	499464	501305	1842	394.31	36.2599	1.9128	34.9552	.//_peak_1253
chr22	291014	292105	1092	693.84	66.9267	1.91244	65.44	.//_peak_1638
chr2	492722	495962	3241	369.99	38.3929	1.91163	37.1047	.//_peak_1369
chr14	916011	917711	1701	572.81	49.3942	1.91155	47.9682	.//_peak_901
chr1	1203177	1204721	1545	529.86	46.8162	1.91044	45.4129	.//_peak_123
chr7	726968	727349	382	352.91	31.2284	1.90917	29.9505	.//_peak_2718
chr2	1247881	1248220	340	346.16	30.6319	1.90883	29.3595	.//_peak_1475
chr21	413959	416131	2173	476.44	44.0389	1.90868	42.6744	.//_peak_1619
chr5	861133	861729	597	325.54	27.6268	1.90854	26.3722	.//_peak_2319
chr7	753291	755666	2376	540.26	49.3644	1.90799	47.9559	.//_peak_2723
chr3	1119506	1120041	536	390.25	34.2276	1.90682	32.9237	.//_peak_1877
chr2	1064732	1067472	2741	649.08	56.0076	1.90664	54.5366	.//_peak_1442
chr4	627064	627423	360	337.48	29.7999	1.9064	28.5357	.//_peak_2059
chr3	650625	650979	355	500.94	42.9773	1.90579	41.5994	.//_peak_1822
chr23	167206	168886	1681	321.44	28.5255	1.90561	27.2753	.//_peak_1671
chr3	1060937	1061453	517	456.53	43.9984	1.9046	42.6459	.//_peak_1867
chr7	347848	349975	2128	362.78	40.0529	1.90383	38.7716	.//_peak_2667
chr10	1028195	1028668	474	386.45	33.3379	1.90374	32.0404	.//_peak_335
chr7	285381	285934	554	468.86	40.7352	1.90295	39.3792	.//_peak_2657
chr5	730456	736457	6002	484.32	43.9009	1.90287	42.5339	.//_peak_2296
chr37	14209	19322	5114	415.46	38.68	1.90264	37.3606	.//_peak_1968
chr11	240367	241146	780	556.07	48.6505	1.90263	47.2395	.//_peak_388
chr6	454183	458639	4457	414.81	37.7596	1.90244	36.4446	.//_peak_2462
chr8	623724	624292	569	420.44	39.226	1.90223	37.9145	.//_peak_2832
chr12	432542	432922	381	359.69	31.7055	1.90205	30.4255	.//_peak_558
chr5	1149628	1150818	1191	395.2	43.7982	1.90107	42.4898	.//_peak_2360
chr7	637375	638494	1120	389.4	32.4801	1.90049	31.181	.//_peak_2709
chr5	1354637	1356741	2105	499.27	46.3108	1.90046	44.9284	.//_peak_2385
chr4	388740	390443	1704	356.51	30.2375	1.90022	28.9609	.//_peak_2024
chr6	1116981	1119800	2820	471.99	40.8179	1.89965	39.4647	.//_peak_2566
chr12	629835	632071	2237	691.39	62.9164	1.89924	61.429	.//_peak_586
chr1	1597411	1597807	397	371.69	33.0567	1.89901	31.7715	.//_peak_174
chr10	381853	382508	656	327.56	28.1406	1.89893	26.8886	.//_peak_245
chr13	412823	416551	3729	405.09	40.0553	1.89884	38.747	.//_peak_689
chr3	265535	269912	4378	341.82	35.3372	1.89875	34.0771	.//_peak_1785
chr11	670601	671147	547	722.06	67.5323	1.89861	66.0186	.//_peak_453
chr4	598479	598979	501	375.98	33.4465	1.89813	32.1544	.//_peak_2057
chr15	166216	168350	2135	496.34	48.0217	1.89807	46.6431	.//_peak_937
chr2	551404	553224	1821	550.51	49.3938	1.89677	47.9949	.//_peak_1378
chr15	690617	691402	786	456.89	41.2869	1.89658	39.9389	.//_peak_1001
chr3	1376681	1381171	4491	849.23	71.34	1.89656	69.7869	.//_peak_1915
chr2	1014614	1014957	344	315.34	27.4943	1.896	26.2529	.//_peak_1437
chr10	99541	100035	495	362.61	31.3327	1.89525	30.0521	.//_peak_205
chr11	534183	536283	2101	571.51	54.9827	1.89512	53.5582	.//_peak_435
chr18	209559	211010	1452	316.69	29.0982	1.89471	27.8575	.//_peak_1221
chr4	1377630	1378005	376	385.55	33.1439	1.89459	31.8472	.//_peak_2171
chr17	109604	110294	691	550.28	47.0707	1.89452	45.669	.//_peak_1131
chr5	462628	467788	5161	478.51	46.5273	1.89406	45.1744	.//_peak_2260
chr16	326920	332049	5130	343.73	36.2069	1.89394	34.9536	.//_peak_1065
chr21	240722	243650	2929	531.11	54.5926	1.89331	53.204	.//_peak_1599
chr2	798509	800328	1820	332.22	28.2726	1.89329	27.0192	.//_peak_1406
chr14	494058	495448	1391	601.36	48.9557	1.89321	47.523	.//_peak_840
chr20	422677	423066	390	856.56	72.5037	1.89156	70.9314	.//_peak_1571
chr6	616329	618664	2336	405.06	35.6452	1.89144	34.3383	.//_peak_2491
chr5	1412125	1412981	857	399.61	34.3404	1.8913	33.0441	.//_peak_2395
chr8	632261	633016	756	1134.79	101.177	1.8912	99.4605	.//_peak_2833
chr3	142683	143604	922	350.48	30.322	1.89116	29.0539	.//_peak_1765
chr14	845225	845789	565	530.86	49.8897	1.89109	48.4928	.//_peak_890
chr6	535280	539029	3750	521.65	43.7342	1.8909	42.3562	.//_peak_2477
chr12	58180	60500	2321	407.67	42.3067	1.88966	40.9965	.//_peak_517
chr4	1320062	1320661	600	633.25	54.9966	1.88965	53.542	.//_peak_2163
chr10	804958	805374	417	393.11	33.5724	1.88933	32.2722	.//_peak_305
chr12	510605	511419	815	381.43	38.0871	1.88921	36.792	.//_peak_568
chr18	608921	610887	1967	403.6	50.6683	1.88876	49.3524	.//_peak_1263
chr2	802548	804420	1873	372.34	35.4698	1.88844	34.1821	.//_peak_1407
chr11	656616	657240	625	584.71	48.6395	1.88831	47.2185	.//_peak_450
chr13	437118	440829	3712	424.04	45.4813	1.88777	44.185	.//_peak_691
chr6	204621	206692	2072	423.59	37.4459	1.88674	36.13	.//_peak_2433
chr12	1035436	1039654	4219	600.34	52.0199	1.88637	50.5877	.//_peak_623
chr1	886971	888065	1095	463.9	41.0011	1.88563	39.661	.//_peak_83
chr5	201483	202524	1042	393.21	35.8506	1.88508	34.5539	.//_peak_2225
chr16	484572	490287	5716	496.73	45.9225	1.88493	44.5568	.//_peak_1077
chr6	477099	479186	2088	532.1	46.0894	1.88483	44.6981	.//_peak_2467
chr1	965147	966760	1614	368.39	31.0266	1.88374	29.7498	.//_peak_94
chr9	891575	892515	941	510.57	43.9865	1.88362	42.63	.//_peak_2991
chr3	1575695	1576564	870	382.79	37.2819	1.88359	35.991	.//_peak_1937
chr7	509622	510032	411	529.21	46.3282	1.88266	44.9411	.//_peak_2691
chr1	1232253	1239591	7339	471.91	39.9076	1.88249	38.5697	.//_peak_127
chr3	555561	558125	2565	486.58	42.5199	1.88187	41.1636	.//_peak_1812
chr2	198697	199274	578	460.79	42.1051	1.88146	40.7561	.//_peak_1327
chr17	560173	560499	327	342.18	28.8155	1.88064	27.557	.//_peak_1181
chr7	868118	869525	1408	624.83	51.3508	1.88046	49.9064	.//_peak_2739
chr6	402758	405175	2418	343.53	33.5645	1.88025	32.3084	.//_peak_2455
chr6	527720	529277	1558	357.41	32.3454	1.87999	31.0775	.//_peak_2475
chr9	240135	240753	619	386.83	33.0606	1.87996	31.774	.//_peak_2899
chr8	522934	525406	2473	406.38	36.2883	1.87988	35.0131	.//_peak_2816
chr2	1142747	1144759	2013	572.5	43.3058	1.87984	41.9246	.//_peak_1457
chr2	528320	530267	1948	357.9	34.8808	1.87941	33.6087	.//_peak_1374
chr8	549533	549909	377	410.5	34.724	1.87927	33.4187	.//_peak_2818
chr1	1764307	1769637	5331	632.19	59.9836	1.87914	58.5338	.//_peak_190
chr3	515075	516994	1920	413.38	34.5656	1.8791	33.2563	.//_peak_1810
chr7	204440	208122	3683	343.91	27.5809	1.87875	26.327	.//_peak_2644
chr23	210934	211287	354	427.12	35.8463	1.87864	34.5314	.//_peak_1678
chr19	188696	189862	1167	461.98	36.5293	1.87839	35.1941	.//_peak_1281
chr10	1021360	1021678	319	388.32	32.0908	1.87836	30.8003	.//_peak_333
chr19	220432	221265	834	350.6	27.692	1.87822	26.434	.//_peak_1285
chr11	377486	378432	947	540	47.3548	1.87768	45.9617	.//_peak_410
chr6	917646	918035	390	330.48	27.957	1.87738	26.7097	.//_peak_2536
chr9	425837	426282	446	408.91	35.9742	1.87718	34.6706	.//_peak_2926
chr13	201219	201977	759	311.99	26.5178	1.87596	25.2863	.//_peak_659
chr17	499825	503186	3362	520.98	49.4102	1.87592	48.0295	.//_peak_1176
chr4	168031	172376	4346	397.3	44.6774	1.87493	43.4039	.//_peak_1992
chr5	996245	997154	910	371.64	35.675	1.87479	34.3941	.//_peak_2338
chr21	429569	429933	365	530.77	43.9698	1.87394	42.5881	.//_peak_1621
chr4	1576099	1576848	750	514.05	45.8876	1.87351	44.51	.//_peak_2199
chr12	324753	326114	1362	407.02	42.0231	1.87308	40.7094	.//_peak_547
chr13	975167	978637	3471	369.78	37.594	1.873	36.321	.//_peak_766
chr5	1398119	1398718	600	381.63	31.466	1.87172	30.1813	.//_peak_2392
chr20	412428	412815	388	840.72	69.5116	1.8715	67.961	.//_peak_1569
chr8	221530	221977	448	353.05	29.9356	1.87148	28.6727	.//_peak_2790
chr20	414250	421244	6995	1308.54	101.428	1.87077	99.6681	.//_peak_1570
chr7	179608	180611	1004	858.74	72.1825	1.87002	70.6227	.//_peak_2640
chr26	6913	8045	1133	414.67	32.2345	1.86869	30.9595	.//_peak_1721
chr5	1396551	1396875	325	358.49	29.4317	1.86863	28.1676	.//_peak_2391
chr11	380255	381257	1003	828.71	65.8053	1.86853	64.2781	.//_peak_411
chr15	8619	9177	559	487.01	45.4162	1.86763	44.0682	.//_peak_917
chr11	646304	647621	1318	478.08	40.1329	1.86737	38.7915	.//_peak_448
chr11	1036444	1036896	453	380.42	32.5088	1.86693	31.2304	.//_peak_497
chr3	1032187	1032551	365	373.88	30.1977	1.86688	28.9248	.//_peak_1860
chr12	547995	549873	1879	354.09	29.1311	1.86679	27.8717	.//_peak_575
chr5	1426645	1428270	1626	327.52	26.0237	1.86675	24.7879	.//_peak_2397
chr6	793226	794662	1437	358.09	31.758	1.86669	30.4936	.//_peak_2520
chr5	273138	274264	1127	543.45	46.086	1.86643	44.6925	.//_peak_2235
chr13	140084	142702	2619	377.9	38.7841	1.86632	37.4996	.//_peak_650
chr11	741136	746237	5102	746.9	67.8918	1.86523	66.3929	.//_peak_459
chr14	889752	890542	791	516.13	42.7496	1.86494	41.3849	.//_peak_898
chr23	20673	25331	4659	343.06	36.6428	1.86362	35.3963	.//_peak_1652
chr10	890463	896630	6168	460.71	40.8169	1.86331	39.4853	.//_peak_317
chr18	612610	614281	1672	371.62	35.5614	1.86287	34.2866	.//_peak_1264
chr4	194280	194597	318	334.04	27.3786	1.86283	26.1331	.//_peak_1996
chr18	134131	134758	628	375.52	31.8478	1.86221	30.5771	.//_peak_1211
chr9	925403	926795	1393	437.37	35.7226	1.86177	34.4246	.//_peak_2997
chr23	308215	311082	2868	435.22	40.5864	1.8616	39.2676	.//_peak_1687
chr7	975866	976749	884	368.8	29.3934	1.86126	28.1319	.//_peak_2748
chr4	371270	371694	425	427.25	36.7377	1.86064	35.4281	.//_peak_2021
chr8	567085	568127	1043	450.85	42.2528	1.8606	40.9237	.//_peak_2823
chr10	211961	212506	546	595.9	47.9524	1.86001	46.555	.//_peak_222
chr9	457797	458133	337	309.19	25.2564	1.85916	24.033	.//_peak_2931
chr10	649987	650579	593	590.66	49.7358	1.8589	48.3238	.//_peak_278
chr4	155679	157186	1508	590.69	45.374	1.85854	43.9733	.//_peak_1991
chr21	410012	410946	935	487.31	40.8681	1.85837	39.5273	.//_peak_1618
chr4	587927	588403	477	403.24	34.0189	1.85826	32.7258	.//_peak_2056
chr20	396908	397351	444	908.74	75.6317	1.85825	74.058	.//_peak_1567
chr6	978924	980118	1195	326.56	28.4383	1.85817	27.2011	.//_peak_2544
chr4	411799	414869	3071	690.07	61.0928	1.858	59.6231	.//_peak_2028
chr8	671196	671583	388	338.74	27.8989	1.85754	26.6519	.//_peak_2835
chr12	515710	516073	364	308.88	25.4039	1.85729	24.1815	.//_peak_569
chr4	975837	980343	4507	409.87	34.7417	1.85717	33.4445	.//_peak_2110
chr9	856230	857377	1148	412.76	43.026	1.85674	41.7215	.//_peak_2984
chr9	506622	509519	2898	526.16	45.9753	1.85672	44.6099	.//_peak_2940
chr13	374217	374578	362	309.35	25.1915	1.85665	23.9691	.//_peak_683
chr2	1518617	1518995	379	401.69	33.1158	1.85642	31.8226	.//_peak_1507
chr11	255433	255758	326	488.27	38.6451	1.85535	37.3021	.//_peak_393
chr18	126938	128419	1482	353.67	29.6718	1.85458	28.414	.//_peak_1210
chr3	251520	252332	813	337.2	30.4118	1.85351	29.1683	.//_peak_1781
chr3	574466	575446	981	325.78	30.3311	1.85324	29.0952	.//_peak_1813
chr31	46296	47131	836	491.51	38.1842	1.8532	36.8371	.//_peak_1948
chr12	380688	382209	1522	435.76	38.028	1.85294	36.7184	.//_peak_553
chr8	663544	663948	405	335.16	27.8507	1.85292	26.6085	.//_peak_2834
chr6	1465218	1465715	498	416.66	35.8239	1.85259	34.5241	.//_peak_2609
chr3	196855	197824	970	416.2	39.2315	1.85252	37.9279	.//_peak_1774
chr2	289237	289787	551	381.84	31.9085	1.85186	30.6334	.//_peak_1339
chr13	648002	650720	2719	406.01	38.2827	1.8517	36.9943	.//_peak_720
chr4	1019057	1019504	448	312.85	26.8523	1.85123	25.6286	.//_peak_2119
chr5	538858	540338	1481	410.71	40.5518	1.85114	39.2504	.//_peak_2266
chr7	267963	268449	487	489.83	41.8287	1.85096	40.4818	.//_peak_2652
chr7	1129754	1130081	328	307.67	24.6696	1.85005	23.4507	.//_peak_2759
chr13	764844	765194	351	341.07	27.5617	1.8497	26.3161	.//_peak_732
chr10	360473	363517	3045	559.38	47.9296	1.84952	46.5479	.//_peak_242
chr1	1304263	1304764	502	337.12	27.4421	1.84884	26.1992	.//_peak_138
chr2	946083	948389	2307	383.41	38.0155	1.84855	36.7386	.//_peak_1429
chr13	1026681	1027542	862	377.25	30.2513	1.84835	28.9897	.//_peak_774
chr13	286323	287119	797	308.76	25.4192	1.84828	24.2002	.//_peak_669
chr21	190629	191039	411	572.98	47.6882	1.84766	46.2911	.//_peak_1597
chr2	832532	836650	4119	364.83	36.4187	1.8457	35.1596	.//_peak_1414
chr9	134496	134873	378	337.58	26.669	1.84517	25.4318	.//_peak_2884
chr11	938302	939214	913	419.92	34.5812	1.84489	33.2845	.//_peak_486
chr11	945538	946662	1125	558.28	45.2024	1.84488	43.8118	.//_peak_488
chr13	878463	881449	2987	415.57	36.2468	1.84416	34.9542	.//_peak_751
chr1	854387	856288	1902	434.2	33.5674	1.84359	32.2625	.//_peak_76
chr9	251113	252036	924	429.68	39.4462	1.84328	38.1406	.//_peak_2901
chr14	668394	668737	344	547.52	43.1455	1.84302	41.7706	.//_peak_867
chr20	225208	225710	503	555.64	45.5148	1.84284	44.1329	.//_peak_1548
chr3	507356	511937	4582	308.02	32.5568	1.84253	31.3445	.//_peak_1809
chr23	2195	2543	349	511.79	40.0176	1.8412	38.663	.//_peak_1649
chr13	969344	969829	486	497.04	40.0018	1.84091	38.6553	.//_peak_764
chr14	304224	305920	1697	470.82	39.9955	1.83927	38.6773	.//_peak_821
chr10	704174	704514	341	416.28	32.3195	1.83919	31.0311	.//_peak_284
chr18	92657	93388	732	401.06	31.2089	1.83867	29.9247	.//_peak_1208
chr12	226851	228072	1222	391.69	36.0537	1.83859	34.772	.//_peak_538
chr6	450537	450944	408	317.29	25.5533	1.83812	24.3309	.//_peak_2461
chr16	195100	195840	741	482.99	37.1923	1.83773	35.8561	.//_peak_1047
chr2	765958	767375	1418	442.3	38.0567	1.83727	36.743	.//_peak_1401
chr21	318041	318439	399	540.43	44.6632	1.8367	43.2934	.//_peak_1610
chr15	327211	329251	2041	487.15	40.9802	1.83604	39.6414	.//_peak_961
chr4	1548444	1549058	615	410.51	31.2889	1.83594	30.006	.//_peak_2194
chr10	1037269	1039552	2284	392.68	30.4238	1.83533	29.1491	.//_peak_336
chr7	1113957	1116391	2435	390.23	31.4754	1.83527	30.2095	.//_peak_2757
chr4	1261534	1261904	371	373.25	30.4622	1.8352	29.2006	.//_peak_2155
chr2	144191	148866	4676	388.53	30.579	1.83506	29.3089	.//_peak_1321
chr6	245645	247772	2128	413.73	38.1217	1.83478	36.8261	.//_peak_2437
chr17	419223	419904	682	630.52	48.2399	1.83475	46.8192	.//_peak_1171
chr17	155892	157228	1337	608.51	47.5748	1.83448	46.1724	.//_peak_1137
chr8	593175	593781	607	412.23	35.4646	1.83368	34.1846	.//_peak_2826
chr4	1466146	1471459	5314	420	38.0513	1.83337	36.7647	.//_peak_2186
chr12	199261	199618	358	306.27	24.6118	1.83316	23.4002	.//_peak_533
chr9	1272462	1274001	1540	306.23	25.1822	1.83299	23.9716	.//_peak_3045
chr1	703652	705084	1433	389.72	31.1758	1.83261	29.9032	.//_peak_57
chr9	283968	285241	1274	436.88	37.0992	1.83159	35.7937	.//_peak_2907
chr14	472420	473631	1212	577.42	44.5716	1.83137	43.1885	.//_peak_836
chr14	549707	550669	963	559.86	41.6243	1.83109	40.2483	.//_peak_849
chr5	1281085	1286242	5158	450.61	36.6375	1.8306	35.3236	.//_peak_2375
chr13	1064729	1065191	463	311.24	24.4247	1.83049	23.2099	.//_peak_780
chr9	863157	863678	522	378.61	30.2723	1.83042	29.0089	.//_peak_2986
chr11	643454	644367	914	501.35	49.0801	1.82986	47.7277	.//_peak_447
chr9	1012373	1015178	2806	537.32	42.4265	1.82896	41.0794	.//_peak_3012
chr14	600675	601394	720	441.81	35.3371	1.82892	34.0335	.//_peak_856
chr6	834961	835360	400	379.67	30.2827	1.82872	29.0186	.//_peak_2526
chr30	35413	35740	328	304.08	23.613	1.82854	22.4049	.//_peak_1942
chr2	1315752	1316863	1112	466.96	38.6701	1.82838	37.3545	.//_peak_1483
chr15	399921	401730	1810	929.55	88.9571	1.82827	87.3805	.//_peak_973
chr15	872018	873016	999	459.21	36.3916	1.82729	35.077	.//_peak_1021
chr6	1133599	1135251	1653	428.34	43.3433	1.82726	42.0342	.//_peak_2569
chr10	787400	790286	2887	361.9	31.3154	1.8265	30.0622	.//_peak_301
chr13	812764	813274	511	428.74	34.7998	1.82543	33.5018	.//_peak_740
chr5	204671	206732	2062	329.56	27.3467	1.82473	26.1212	.//_peak_2226
chr2	644479	646375	1897	335.75	27.9232	1.8241	26.6909	.//_peak_1388
chr5	606912	607744	833	337.08	27.5478	1.82404	26.3214	.//_peak_2276
chr5	1545746	1548349	2604	506.6	45.1423	1.824	43.7947	.//_peak_2407
chr14	983335	985878	2544	488.71	39.0016	1.82392	37.6726	.//_peak_910
chr12	1126415	1128459	2045	414.23	34.1007	1.82327	32.8285	.//_peak_632
chr11	443340	444113	774	523.56	41.401	1.82281	40.0642	.//_peak_425
chr5	413780	414141	362	323.99	25.6597	1.82249	24.4391	.//_peak_2251
chr5	1005727	1006708	982	361.96	28.8709	1.82243	27.6218	.//_peak_2341
chr5	691694	692476	783	325.14	29.6307	1.82223	28.408	.//_peak_2290
chr21	285150	286386	1237	579.5	41.3879	1.82125	40.0071	.//_peak_1603
chr7	300039	300835	797	378.58	34.6529	1.82123	33.3913	.//_peak_2659
chr21	248957	250539	1583	331.09	30.3655	1.82077	29.1418	.//_peak_1600
chr3	1283194	1285498	2305	405.57	33.0434	1.82037	31.7644	.//_peak_1899
chr6	1218589	1221563	2975	367.69	34.2139	1.82034	32.959	.//_peak_2578
chr2	1085741	1086059	319	332.23	25.7766	1.82032	24.5493	.//_peak_1446
chr10	53690	55210	1521	404.02	36.3341	1.82005	35.0544	.//_peak_200
chr15	454535	455751	1217	488.66	46.2121	1.8195	44.8768	.//_peak_979
chr7	876015	876589	575	376.54	29.0828	1.81949	27.8229	.//_peak_2741
chr9	503411	504907	1497	469.35	35.3134	1.81879	33.9967	.//_peak_2939
chr10	183466	185111	1646	375.35	30.4108	1.8179	29.1558	.//_peak_217
chr7	113731	114864	1134	769.25	75.2092	1.8179	73.7167	.//_peak_2629
chr6	1180962	1181571	610	560.27	44.1484	1.81767	42.7732	.//_peak_2575
chr11	237665	239003	1339	558.56	44.3152	1.81664	42.9466	.//_peak_387
chr1	1527030	1531102	4073	408.3	34.6302	1.81632	33.3528	.//_peak_163
chr12	555317	557534	2218	450.49	43.3064	1.81576	42.0079	.//_peak_576
chr7	1136287	1142137	5851	395.99	32.473	1.81502	31.2016	.//_peak_2761
chr9	382257	382806	550	383.85	28.8858	1.81475	27.624	.//_peak_2922
chr4	1580863	1581333	471	353.88	26.9546	1.81469	25.7152	.//_peak_2201
chr2	864183	866721	2539	402.93	30.577	1.81457	29.3091	.//_peak_1419
chr3	669164	670567	1404	310.96	24.45	1.81436	23.2438	.//_peak_1825
chr4	227314	228166	853	353.54	26.7994	1.81419	25.5633	.//_peak_2002
chr7	665013	665527	515	394.48	30.9958	1.8135	29.7264	.//_peak_2712
chr7	807931	809491	1561	312.12	24.0301	1.81209	22.8228	.//_peak_2731
chr1	935222	936459	1238	387.56	30.0765	1.81172	28.8128	.//_peak_90
chr4	118763	121580	2818	626.37	55.5264	1.81042	54.1118	.//_peak_1984
chr12	288346	289501	1156	368.74	26.8982	1.81031	25.6509	.//_peak_542
chr9	536361	540493	4133	529.51	39.5166	1.81004	38.1729	.//_peak_2945
chr12	131419	132208	790	305.16	23.5882	1.80957	22.386	.//_peak_527
chr12	475633	476706	1074	349.6	28.1275	1.80934	26.902	.//_peak_562
chr7	336597	338936	2340	413.91	43.759	1.80933	42.4799	.//_peak_2666
chr20	179779	184319	4541	975.38	70.3582	1.80889	68.8093	.//_peak_1542
chr7	155684	160025	4342	569.68	59.1357	1.80883	57.7616	.//_peak_2637
chr10	1067805	1069385	1581	583.29	46.0108	1.80864	44.6283	.//_peak_339
chr2	1097891	1098434	544	573.61	45.2159	1.8086	43.8346	.//_peak_1449
chr2	1231786	1233944	2159	323.14	26.8335	1.80838	25.6181	.//_peak_1472
chr9	1001565	1002859	1295	414.29	35.7997	1.80811	34.5185	.//_peak_3011
chr12	121099	121865	767	462.36	33.8178	1.80806	32.5098	.//_peak_525
chr18	291357	291691	335	390.35	29.5702	1.8078	28.3098	.//_peak_1231
chr5	1404961	1406497	1537	318.95	22.6552	1.80777	21.4479	.//_peak_2393
chr2	1274071	1274579	509	368.39	28.3426	1.80767	27.0925	.//_peak_1478
chr12	303063	304638	1576	471.37	38.8883	1.80753	37.5803	.//_peak_545
chr13	856527	856877	351	369.4	27.4776	1.80747	26.2323	.//_peak_749
chr13	1007294	1007636	343	357.42	27.3491	1.80735	26.1096	.//_peak_770
chr6	1281328	1286841	5514	335.5	34.3641	1.80729	33.1541	.//_peak_2585
chr6	1232457	1233699	1243	312.64	23.3582	1.80693	22.1515	.//_peak_2580
chr16	479098	480749	1652	304.35	26.1601	1.80639	24.9632	.//_peak_1076
chr10	559663	562458	2796	489.6	36.1999	1.80586	34.8886	.//_peak_268
chr5	882731	884318	1588	442.95	36.5143	1.8056	35.2159	.//_peak_2324
chr7	269814	270629	816	338.23	31.0507	1.80538	29.824	.//_peak_2653
chr4	575498	575866	369	346.62	26.6332	1.80487	25.4042	.//_peak_2055
chr6	1498238	1499594	1357	718.77	67.5175	1.80459	66.0775	.//_peak_2616
chr14	923049	924129	1081	804.86	61.6648	1.80285	60.1851	.//_peak_902
chr1	847687	848015	329	343.79	25.541	1.80226	24.3138	.//_peak_75
chr11	1000654	1001103	450	341.49	26.3195	1.80212	25.0933	.//_peak_493
chr2	108562	109791	1230	370.28	31.3093	1.80208	30.0648	.//_peak_1316
chr1	1515311	1515713	403	350.23	27.1767	1.80202	25.9435	.//_peak_162
chr16	491860	495606	3747	478.23	38.1956	1.80098	36.8902	.//_peak_1078
chr25	110342	110671	330	529.24	39.366	1.80078	38.0217	.//_peak_1719
chr18	454632	455056	425	364.38	27.3171	1.8007	26.0737	.//_peak_1250
chr9	874733	876943	2211	615.99	49.4798	1.80051	48.0825	.//_peak_2988
chr16	381817	382797	981	421.74	38.0963	1.79998	36.8151	.//_peak_1069
chr12	526923	527251	329	299.3	22.3756	1.7999	21.1818	.//_peak_571
chr1	282162	284766	2605	328.45	25.4035	1.79966	24.1899	.//_peak_20
chr3	1177609	1183837	6229	417.77	35.2788	1.79909	34.0012	.//_peak_1886
chr4	839290	839793	504	483.04	36.2334	1.79898	34.915	.//_peak_2089
chr5	1237464	1240255	2792	438.03	33.0208	1.79822	31.736	.//_peak_2369
chr10	797996	798307	312	348.32	25.5241	1.79744	24.2948	.//_peak_303
chr18	440890	443136	2247	484.09	39.9167	1.79728	38.5954	.//_peak_1248
chr2	872302	872646	345	346.75	25.4089	1.7966	24.1837	.//_peak_1420
chr6	1104854	1107543	2690	985.75	76.1761	1.79567	74.6131	.//_peak_2564
chr1	1594619	1595507	889	428.73	33.9403	1.79564	32.658	.//_peak_173
chr9	542104	545617	3514	340.45	27.0255	1.79564	25.8058	.//_peak_2946
chr3	253883	257996	4114	468.64	37.852	1.79537	36.546	.//_peak_1782
chr13	1040486	1040794	309	360.34	26.2776	1.79494	25.0441	.//_peak_777
chr11	794804	795288	485	412.52	31.4847	1.79426	30.2118	.//_peak_466
chr3	885134	886519	1386	298.31	24.2005	1.79393	23.0107	.//_peak_1844
chr13	533346	535377	2032	462.44	37.6878	1.7939	36.3905	.//_peak_705
chr9	413651	416568	2918	517.83	40.3469	1.7939	39.0156	.//_peak_2925
chr12	352148	352464	317	330.42	23.8816	1.79364	22.6694	.//_peak_551
chr32	8178	9718	1541	303.61	23.2801	1.79363	22.0854	.//_peak_1951
chr23	36866	37816	951	439.01	35.739	1.79352	34.4569	.//_peak_1654
chr17	200231	200813	583	491.63	37.1339	1.79351	35.8139	.//_peak_1142
chr16	576610	576969	360	319.66	24.0421	1.79306	22.8343	.//_peak_1088
chr11	191865	194449	2585	466.66	38.5243	1.79295	37.2182	.//_peak_380
chr13	341683	347103	5421	440.87	39.4294	1.79229	38.1442	.//_peak_677
chr9	887140	888847	1708	509.16	42.8907	1.79226	41.5599	.//_peak_2990
chr4	423796	424540	745	330.1	23.9355	1.79222	22.7225	.//_peak_2031
chr16	836365	841154	4790	407.71	32.3604	1.79148	31.0961	.//_peak_1111
chr5	823312	824289	978	473.55	36.643	1.79118	35.3351	.//_peak_2312
chr3	374214	376049	1836	530.07	39.1609	1.7903	37.8272	.//_peak_1796
chr10	277856	278917	1062	512.22	40.1174	1.78931	38.7851	.//_peak_229
chr4	773913	775475	1563	581.76	42.5104	1.78916	41.144	.//_peak_2079
chr6	578851	581670	2820	404.22	33.0392	1.78909	31.783	.//_peak_2482
chr6	1137662	1138082	421	297.49	21.9597	1.78905	20.7714	.//_peak_2570
chr11	1095460	1097900	2441	715.35	49.9972	1.78902	48.5626	.//_peak_503
chr6	1411809	1412451	643	466.58	38.8047	1.78867	37.5076	.//_peak_2599
chr23	234405	236178	1774	436.39	37.7259	1.78864	36.4349	.//_peak_1682
chr3	1296051	1297010	960	366.82	31.7079	1.78795	30.4668	.//_peak_1902
chr17	339889	340271	383	582.37	43.1543	1.78755	41.7856	.//_peak_1162
chr5	34664	36380	1717	407.43	48.6796	1.7875	47.4	.//_peak_2205
chr9	970972	972959	1988	490.73	41.4906	1.78695	40.1798	.//_peak_3006
chr6	1312202	1313840	1639	377.19	30.243	1.78547	28.9998	.//_peak_2587
chr4	1480491	1483455	2965	422.06	31.4798	1.78503	30.2217	.//_peak_2188
chr12	986156	993453	7298	389.28	36.3742	1.78424	35.1217	.//_peak_617
chr2	582611	584836	2226	323.49	28.1398	1.78387	26.9346	.//_peak_1382
chr11	1139820	1140274	455	299.13	22.2724	1.78354	21.0846	.//_peak_506
chr23	6009	6647	639	491.16	38.559	1.78352	37.2393	.//_peak_1650
chr13	226670	227829	1160	354.02	26.1587	1.78349	24.9319	.//_peak_665
chr7	863709	864109	401	374.23	28.0636	1.78299	26.8216	.//_peak_2738
chr4	1223155	1223874	720	308.64	24.956	1.78124	23.7615	.//_peak_2147
chr2	205439	206674	1236	342.29	29.1741	1.78119	27.9518	.//_peak_1328
chr3	318136	318971	836	352.94	25.3666	1.78093	24.1415	.//_peak_1790
chr1	200715	201506	792	296.13	23.458	1.78089	22.2743	.//_peak_15
chr4	149498	151159	1662	456.29	35.0899	1.78089	33.7962	.//_peak_1990
chr4	1124304	1127643	3340	394.81	32.8409	1.78036	31.584	.//_peak_2133
chr5	343806	344314	509	381.59	28.202	1.78027	26.9572	.//_peak_2241
chr18	478553	478983	431	360.83	26.3385	1.77988	25.1063	.//_peak_1251
plasmid	4162	10259	6098	78706.6	5211.63	1.7794	5207.64	.//_peak_3048
chr2	1073009	1074976	1968	460.77	33.2695	1.77904	31.9759	.//_peak_1443
chr6	1029762	1033194	3433	555.56	43.7759	1.77891	42.424	.//_peak_2553
chr4	1027583	1028130	548	377.15	27.6734	1.77869	26.4328	.//_peak_2121
chr13	682902	684776	1875	435.79	32.6051	1.77829	31.3316	.//_peak_722
chr12	1069576	1070239	664	388.59	26.8159	1.77821	25.5695	.//_peak_627
chr3	664988	665952	965	317.12	26.4755	1.77805	25.2749	.//_peak_1824
chr22	75815	77542	1728	295.61	21.8644	1.77774	20.682	.//_peak_1628
chr8	239351	243864	4514	328.17	25.799	1.77739	24.5912	.//_peak_2792
chr13	620951	628932	7982	399.07	31.3515	1.77731	30.1004	.//_peak_716
chr4	1460205	1460743	539	461.24	32.8282	1.77724	31.5376	.//_peak_2185
chr3	415150	415486	337	298.09	21.2846	1.77721	20.1007	.//_peak_1802
chr4	1579172	1579621	450	391.74	28.659	1.77658	27.4092	.//_peak_2200
chr2	324049	324375	327	327.83	23.6157	1.77649	22.4093	.//_peak_1344
chr4	1132295	1132754	460	425.35	32.1072	1.77631	30.8356	.//_peak_2134
chr15	302202	302536	335	301.2	21.6649	1.77597	20.4786	.//_peak_956
chr3	1443481	1443892	412	431.98	32.2124	1.77543	30.9386	.//_peak_1921
chr6	822950	824436	1487	411.03	29.3831	1.77525	28.132	.//_peak_2524
chr19	333397	334192	796	295.31	20.8321	1.77521	19.6509	.//_peak_1294
chr8	1198023	1198422	400	295.13	21.0827	1.7749	19.9014	.//_peak_2875
chr7	380566	383468	2903	437.2	35.3709	1.7747	34.0935	.//_peak_2671
chr7	199775	201711	1937	573.93	65.5447	1.77388	64.1819	.//_peak_2643
chr10	350668	352629	1962	332.52	24.5503	1.77379	23.3431	.//_peak_240
chr14	94162	94555	394	327.06	23.6479	1.77301	22.4452	.//_peak_793
chr11	589911	593807	3897	486.23	36.2184	1.77265	34.9151	.//_peak_441
chr4	324335	325422	1088	429.86	35.8871	1.7722	34.6111	.//_peak_2014
chr3	589038	591461	2424	335.41	27.0675	1.77205	25.8571	.//_peak_1815
chr12	1166316	1168428	2113	430.72	30.086	1.77115	28.8204	.//_peak_638
chr5	1463151	1464021	871	393.43	26.595	1.77092	25.3507	.//_peak_2399
chr11	934352	936143	1792	339.26	24.116	1.7709	22.9049	.//_peak_485
chr6	134982	135598	617	354.2	25.3941	1.77077	24.1711	.//_peak_2426
chr13	996601	998873	2273	325.14	25.165	1.77062	23.963	.//_peak_769
chr16	26513	31191	4679	433.07	33.8816	1.77042	32.6101	.//_peak_1032
chr5	803624	805386	1763	320.55	25.0997	1.77003	23.9025	.//_peak_2307
chr7	149106	149584	479	646.34	46.9313	1.76955	45.5387	.//_peak_2636
chr9	1157065	1159177	2113	409.73	29.6697	1.76949	28.4134	.//_peak_3028
chr6	309554	310232	679	335.28	23.3234	1.76912	22.1166	.//_peak_2441
chr3	1047170	1049383	2214	337.44	24.2554	1.76881	23.0499	.//_peak_1864
chr11	561182	561645	464	679.2	49.0909	1.76851	47.6815	.//_peak_438
chr10	942376	944236	1861	556.51	41.001	1.76817	39.6694	.//_peak_324
chr13	220561	221833	1273	326.69	22.3894	1.76759	21.1894	.//_peak_664
chr8	606267	607859	1593	324.53	25.5563	1.76704	24.3652	.//_peak_2829
chr5	231755	232171	417	352.16	25.3842	1.76633	24.166	.//_peak_2230
chr10	257984	258427	444	519.75	38.7154	1.76546	37.3938	.//_peak_227
chr21	466213	467702	1490	301.71	21.0271	1.76438	19.8476	.//_peak_1623
chr4	27666	32288	4623	445.72	35.1939	1.76428	33.9135	.//_peak_1973
chr5	829761	831465	1705	329.59	24.7366	1.7635	23.5334	.//_peak_2314
chr3	705951	706264	314	335.62	23.316	1.76349	22.1107	.//_peak_1831
chr5	1326935	1329365	2431	355.47	25.7304	1.7634	24.5119	.//_peak_2380
chr18	261252	262272	1021	421.19	32.6209	1.76235	31.3558	.//_peak_1227
chr3	1130384	1131694	1311	385.55	30.5405	1.76222	29.299	.//_peak_1879
chr12	819401	819891	491	375.36	27.2373	1.76217	26.0047	.//_peak_603
chr2	735015	738261	3247	465.18	33.9294	1.76216	32.6406	.//_peak_1398
chr6	1352166	1352970	805	304.89	22.2915	1.76121	21.1064	.//_peak_2590
chr3	878770	880120	1351	330.56	25.2491	1.76069	24.0446	.//_peak_1843
chr15	423447	428269	4823	487.01	36.7655	1.76061	35.4624	.//_peak_975
chr20	62348	63700	1353	509.73	41.3294	1.76054	40.0171	.//_peak_1524
chr4	1555751	1557953	2203	385.06	27.6435	1.76031	26.407	.//_peak_2196
chr16	223085	224324	1240	463.46	37.6219	1.76023	36.33	.//_peak_1049
chr31	29503	33194	3692	386.16	29.8409	1.75974	28.6068	.//_peak_1945
chr13	146818	148290	1473	394.99	29.2614	1.75964	28.0186	.//_peak_651
chr5	613414	617379	3966	443.54	38.7747	1.7581	37.497	.//_peak_2277
chr2	38590	39093	504	312.26	21.2242	1.75788	20.0372	.//_peak_1308
chr6	901050	902913	1864	434	31.9469	1.75753	30.6849	.//_peak_2532
chr7	264575	266395	1821	411.37	28.4856	1.75749	27.2344	.//_peak_2651
chr13	709190	710334	1145	468	31.1423	1.75703	29.8583	.//_peak_726
chr13	563626	564829	1204	423.33	30.5245	1.75678	29.2747	.//_peak_709
chr5	970532	971595	1064	341.51	28.1538	1.75655	26.9416	.//_peak_2332
chr5	975086	975711	626	370.82	24.4488	1.75602	23.2236	.//_peak_2333
chr5	594495	597443	2949	338.65	23.5297	1.75594	22.3253	.//_peak_2274
chr5	151213	155692	4480	478.97	34.6361	1.75572	33.3673	.//_peak_2220
chr3	397741	398494	754	343.78	24.3972	1.75529	23.189	.//_peak_1799
chr12	706468	708147	1680	312.97	24.305	1.75504	23.1152	.//_peak_597
chr18	235709	236233	525	369	25.1543	1.75495	23.9288	.//_peak_1225
chr17	681509	681823	315	292.26	20.4432	1.75471	19.2716	.//_peak_1187
chr17	593918	597820	3903	325.73	29.2063	1.75441	28.0066	.//_peak_1184
chr9	937422	941023	3602	478.62	35.7913	1.75435	34.4971	.//_peak_2999
chr2	1237603	1237989	387	323.43	23.0527	1.75367	21.8572	.//_peak_1473
chr14	262339	264010	1672	345.41	25.9448	1.75351	24.7416	.//_peak_816
chr19	84102	85083	982	572.32	41.9404	1.75182	40.6173	.//_peak_1273
chr1	864483	865657	1175	488.42	32.0536	1.75164	30.7617	.//_peak_78
chr3	1458191	1461348	3158	393.74	29.346	1.75065	28.1069	.//_peak_1922
chr2	136927	137482	556	685.8	46.2443	1.75037	44.8416	.//_peak_1320
chr11	320343	321525	1183	424.95	33.7841	1.74992	32.5224	.//_peak_400
chr13	818500	819810	1311	414.1	28.097	1.74945	26.8473	.//_peak_742
chr1	708339	711981	3643	313.14	22.2654	1.74908	21.085	.//_peak_58
chr3	1298586	1299071	486	293.28	20.5756	1.74903	19.4053	.//_peak_1903
chr9	1230190	1230565	376	462.97	32.4265	1.74864	31.1478	.//_peak_3039
chr1	499685	500052	368	406.73	27.0311	1.74823	25.7893	.//_peak_36
chr7	894250	894982	733	379.07	25.8914	1.74802	24.6627	.//_peak_2745
chr5	599178	605516	6339	335.35	28.6075	1.74791	27.4103	.//_peak_2275
chr11	922261	922840	580	530.13	34.7071	1.74713	33.396	.//_peak_484
chr16	829448	831335	1888	321.93	22.8208	1.7465	21.6297	.//_peak_1109
chr10	275345	275707	363	516.43	35.5187	1.74649	34.2106	.//_peak_228
chr13	37543	38627	1085	290.37	21.7079	1.74637	20.5408	.//_peak_641
chr5	787197	788865	1669	315	21.5416	1.74605	20.3577	.//_peak_2304
chr10	214333	214662	330	290.28	19.6363	1.74583	18.4701	.//_peak_223
chr5	237259	242450	5192	509.54	37.1329	1.74583	35.8366	.//_peak_2232
chr14	596985	597556	572	469.24	30.3373	1.74565	29.0571	.//_peak_855
chr18	138992	140381	1390	391.23	26.1537	1.74558	24.9264	.//_peak_1212
chr9	1174848	1179327	4480	448.6	46.112	1.7455	44.8801	.//_peak_3031
chr14	530391	530900	510	384.73	26.3657	1.74542	25.133	.//_peak_848
chr4	435533	435884	352	415.38	28.4211	1.74465	27.1704	.//_peak_2032
chr1	1164750	1166251	1502	355.18	28.6948	1.74451	27.4792	.//_peak_118
chr6	599161	599546	386	295.89	19.8614	1.74443	18.6918	.//_peak_2487
chr3	170925	171295	371	411.33	27.531	1.7439	26.2868	.//_peak_1770
chr11	264630	264943	314	507.93	32.9786	1.74349	31.6803	.//_peak_394
chr11	747536	751500	3965	602.42	44.8376	1.74329	43.5002	.//_peak_460
chr11	205946	208662	2717	530.6	34.8021	1.74279	33.5032	.//_peak_382
chr7	181896	183387	1492	457.43	33.3376	1.74215	32.0626	.//_peak_2641
chr15	351007	351818	812	440.27	28.5632	1.74196	27.3104	.//_peak_967
chr5	638512	640756	2245	467.18	32.0701	1.7419	30.8079	.//_peak_2281
chr4	1385550	1385893	344	384.06	25.8264	1.74161	24.5972	.//_peak_2172
chr2	1196957	1200509	3553	386.48	26.3171	1.74109	25.0879	.//_peak_1467
chr5	294277	295182	906	314.55	21.8439	1.74087	20.6637	.//_peak_2236
chr6	1480559	1482928	2370	796.28	59.8426	1.74087	58.3983	.//_peak_2614
chr7	116300	118183	1884	423.84	28.3686	1.74082	27.1211	.//_peak_2630
chr2	260905	263566	2662	429.38	29.166	1.74073	27.9147	.//_peak_1335
chr7	587136	592310	5175	383.95	29.4412	1.74064	28.2125	.//_peak_2701
chr6	15810	16144	335	490.48	32.7351	1.74029	31.4449	.//_peak_2411
chr6	1082423	1083403	981	813.91	55.8632	1.73995	54.4267	.//_peak_2560
chr12	285859	286442	584	424.76	28.8964	1.73993	27.6571	.//_peak_541
chr4	63396	63699	304	349.64	22.9274	1.73961	21.7228	.//_peak_1977
chr8	1139651	1140108	458	307.42	20.8018	1.73952	19.6243	.//_peak_2874
chr11	518975	521827	2853	499.59	34.6958	1.7393	33.4103	.//_peak_433
chr1	1634262	1634691	430	654.94	44.1327	1.73891	42.7566	.//_peak_176
chr8	236206	237080	875	504.53	32.6004	1.73889	31.3068	.//_peak_2791
chr12	1159169	1160398	1230	536.36	40.3371	1.73812	39.0107	.//_peak_637
chr2	1362672	1363254	583	355.8	23.9133	1.73709	22.7079	.//_peak_1488
chr9	471380	472922	1543	493.63	35.4741	1.73694	34.1808	.//_peak_2933
chr18	446949	447640	692	431.35	27.5395	1.73685	26.2882	.//_peak_1249
chr14	255307	260721	5415	368.55	29.6145	1.73613	28.3959	.//_peak_815
chr1	1393630	1397948	4319	521.03	33.8551	1.73576	32.5587	.//_peak_152
chr7	539494	540338	845	589.28	37.1565	1.73573	35.8172	.//_peak_2697
chr15	613584	613897	314	331.76	21.9559	1.73568	20.7652	.//_peak_992
chr20	467779	469700	1922	530.6	35.9464	1.73566	34.6395	.//_peak_1577
chr6	1018779	1019475	697	414.77	28.404	1.73554	27.1578	.//_peak_2550
chr2	392298	392805	508	374.18	25.3322	1.73513	24.113	.//_peak_1354
chr11	906591	907058	468	291.79	19.7018	1.73511	18.538	.//_peak_480
chr5	737712	739434	1723	406.34	27.4121	1.73492	26.1719	.//_peak_2297
chr5	1062297	1062631	335	388.8	25.6148	1.73491	24.3871	.//_peak_2350
chr3	1216440	1218163	1724	323.71	23.0249	1.73476	21.84	.//_peak_1890
chr3	738221	738620	400	315.76	21.4945	1.73433	20.3144	.//_peak_1834
chr16	385537	390389	4853	344.75	25.1381	1.73402	23.9407	.//_peak_1070
chr10	654178	654968	791	294.04	21.41	1.73377	20.2444	.//_peak_279
chr6	532160	532540	381	292.98	19.7195	1.73377	18.5554	.//_peak_2476
chr20	111360	111901	542	478.85	31.3253	1.73335	30.0432	.//_peak_1531
chr13	901423	902243	821	392.44	25.6246	1.73303	24.3947	.//_peak_755
chr14	1002840	1005493	2654	413.84	29.3524	1.73301	28.1087	.//_peak_911
chr4	1356664	1358430	1767	352.49	23.2906	1.7328	22.0893	.//_peak_2167
chr16	161608	163062	1455	446.25	30.3725	1.7325	29.1187	.//_peak_1042
chr11	785548	786432	885	474.12	32.9225	1.73249	31.645	.//_peak_465
chr6	465591	466018	428	349.01	23.6411	1.73249	22.4394	.//_peak_2464
chr12	330101	331586	1486	355.56	26.9624	1.73241	25.7524	.//_peak_549
chr18	396036	398334	2299	483.26	32.7836	1.73226	31.5055	.//_peak_1245
chr8	935750	939965	4216	399.64	28.0571	1.73203	26.825	.//_peak_2862
chr4	269772	270262	491	347.68	23.293	1.73201	22.091	.//_peak_2008
chr6	1023009	1023882	874	476.3	33.1516	1.73199	31.872	.//_peak_2552
chr1	1306004	1310716	4713	396.33	29.2217	1.73174	27.9885	.//_peak_139
chr6	957693	960231	2539	324.05	30.3569	1.73168	29.1805	.//_peak_2541
chr5	1492294	1493879	1586	546.04	33.2678	1.73151	31.9891	.//_peak_2405
chr12	1001844	1002358	515	419.7	29.8959	1.73069	28.6493	.//_peak_619
chr17	349460	350011	552	683.64	50.2377	1.73061	48.856	.//_peak_1163
chr3	1556355	1558032	1678	394.79	30.8769	1.73001	29.6413	.//_peak_1933
chr5	346162	348304	2143	462.05	34.4839	1.72936	33.2067	.//_peak_2242
chr1	1583501	1588953	5453	360.78	28.1377	1.72913	26.9246	.//_peak_171
chr18	316167	316580	414	404.18	27.0178	1.72898	25.7829	.//_peak_1235
chr5	810723	812807	2085	395.89	29.1371	1.72885	27.9055	.//_peak_2309
chr13	150538	152636	2099	325.91	22.142	1.72869	20.9552	.//_peak_652
chr19	136116	137880	1765	287.38	22.1846	1.72843	21.0271	.//_peak_1275
chr4	1595345	1597338	1994	446.73	33.5676	1.72838	32.3062	.//_peak_2203
chr10	802158	802591	434	390.02	26.4737	1.72771	25.2455	.//_peak_304
chr3	447266	447646	381	344.8	22.4566	1.7269	21.2613	.//_peak_1804
chr1	1566241	1568834	2594	423.91	29.1368	1.72685	27.8964	.//_peak_168
chr7	174733	175162	430	530.84	34.3625	1.72659	33.0583	.//_peak_2639
chr22	151180	152736	1557	451.1	32.0271	1.72641	30.7621	.//_peak_1631
chr4	1429792	1430098	307	349.61	22.5199	1.72637	21.3211	.//_peak_2178
chr1	689867	691432	1566	335.14	23.218	1.72626	22.0278	.//_peak_54
chr9	904495	905000	506	547.74	34.5194	1.7261	33.2061	.//_peak_2993
chr4	1096477	1099902	3426	373.62	29.6151	1.72578	28.3935	.//_peak_2129
chr13	584027	587243	3217	377.13	26.8186	1.72577	25.5993	.//_peak_712
chr13	231213	235604	4392	300.28	21.8363	1.72535	20.6763	.//_peak_666
chr7	409420	410389	970	412.95	29.0694	1.72525	27.832	.//_peak_2675
chr6	79849	80212	364	439.21	29.1614	1.72519	27.9063	.//_peak_2418
chr8	712673	714136	1464	519.03	32.9951	1.72497	31.7004	.//_peak_2841
chr17	397505	400413	2909	430.63	39.863	1.72465	38.6068	.//_peak_1168
chr7	293327	295933	2607	376.14	25.3519	1.7246	24.1429	.//_peak_2658
chr4	551014	553442	2429	371.64	29.1951	1.72375	27.9796	.//_peak_2051
chr8	113954	114283	330	371.33	23.567	1.72375	22.3552	.//_peak_2782
chr7	801268	803448	2181	390.21	26.8409	1.72368	25.6134	.//_peak_2730
chr3	93653	94010	358	311.5	19.9115	1.72307	18.7411	.//_peak_1760
chr10	830808	831812	1005	410.21	26.453	1.7229	25.2195	.//_peak_308
chr26	38306	40853	2548	767.36	54.456	1.72289	53.0312	.//_peak_1727
chr14	467297	469181	1885	379.01	24.7937	1.72287	23.5808	.//_peak_835
chr7	657279	657711	433	404.89	26.9656	1.72274	25.7331	.//_peak_2711
chr14	511596	513979	2384	560.54	46.3436	1.72266	45.0104	.//_peak_844
chr36	6703	7014	312	286.39	18.4428	1.72249	17.2882	.//_peak_1964
chr22	28733	29720	988	306.94	22.4863	1.72242	21.3256	.//_peak_1627
chr11	833110	833688	579	549.28	34.1819	1.72223	32.8732	.//_peak_473
chr15	260191	261349	1159	584.23	42.6583	1.72215	41.3203	.//_peak_948
chr1	736991	738337	1347	302.66	19.1154	1.72171	17.9514	.//_peak_60
chr2	1320362	1321100	739	365.64	26.0889	1.72166	24.8749	.//_peak_1484
chr14	201248	201681	434	488.97	33.0749	1.7209	31.7929	.//_peak_807
chr10	614132	614994	863	399.92	26.696	1.72051	25.4989	.//_peak_273
chr20	458496	458915	420	694.77	44.5288	1.72034	43.1445	.//_peak_1574
chr25	107962	108770	809	629.96	36.7044	1.71935	35.3845	.//_peak_1718
chr19	151151	151464	314	285.83	18.5749	1.71917	17.4219	.//_peak_1277
chr15	695431	696353	923	561.43	38.7159	1.71857	37.3986	.//_peak_1002
chr3	1337380	1338328	949	448.37	28.2044	1.71817	26.9522	.//_peak_1910
chr11	757572	760639	3068	513.42	36.6775	1.71775	35.3818	.//_peak_462
chr6	930678	933472	2795	317.41	31.0718	1.71744	29.9072	.//_peak_2537
chr3	105674	111178	5505	388.09	25.963	1.71706	24.7474	.//_peak_1761
chr17	316816	317284	469	377.36	25.2722	1.71701	24.0574	.//_peak_1158
chr26	26057	28583	2527	779.45	53.9636	1.71674	52.5376	.//_peak_1724
chr13	826454	827754	1301	400.42	25.4031	1.71648	24.1766	.//_peak_743
chr1	117182	117597	416	285.4	18.4895	1.71642	17.3377	.//_peak_9
chr2	1002406	1002926	521	389.57	24.6861	1.71626	23.47	.//_peak_1435
chr9	914817	919979	5163	509.2	34.5344	1.7155	33.2451	.//_peak_2995
chr6	913909	915851	1943	397.13	28.6416	1.71528	27.4125	.//_peak_2535
chr5	1213702	1214041	340	328.64	21.4125	1.71522	20.2309	.//_peak_2366
chr15	747669	752243	4575	527.67	42.7537	1.71468	41.4652	.//_peak_1010
chr1	987467	990689	3223	608.13	38.4054	1.71448	37.0695	.//_peak_97
chr13	493632	494748	1117	292.17	18.4233	1.71424	17.2675	.//_peak_699
chr6	806500	813531	7032	342.55	24.457	1.71399	23.2679	.//_peak_2522
chr13	1069194	1069512	319	337.26	21.0492	1.71387	19.8635	.//_peak_781
chr5	1378827	1384443	5617	461.88	30.0976	1.71384	28.8628	.//_peak_2390
chr3	290002	290371	370	301.17	19.2309	1.7138	18.0686	.//_peak_1787
chr9	1071451	1074342	2892	325.86	29.1214	1.71363	27.9322	.//_peak_3018
chr1	100912	101311	400	284.86	18.7505	1.71336	17.6002	.//_peak_8
chr1	903096	903992	897	649.9	45.523	1.71287	44.1859	.//_peak_85
chr2	1539708	1540082	375	382.05	24.913	1.7126	23.6962	.//_peak_1508
chr10	1189118	1190082	965	351.23	23.6366	1.71258	22.4428	.//_peak_355
chr1	1290973	1294800	3828	422.38	27.7368	1.71256	26.499	.//_peak_135
chr13	799993	801216	1224	331.58	24.2232	1.71227	23.0407	.//_peak_738
chr1	838890	840889	2000	384.99	28.5104	1.71214	27.2883	.//_peak_74
chr11	134890	135519	630	443.5	30.3701	1.71132	29.1166	.//_peak_374
chr10	24081	26207	2127	353.51	23.8511	1.71131	22.6639	.//_peak_197
chr6	826669	828727	2059	365.2	27.2858	1.71129	26.0764	.//_peak_2525
chr10	339322	340594	1273	380.99	25.6626	1.71121	24.4475	.//_peak_238
chr9	385377	385774	398	387.66	25.9467	1.71115	24.7274	.//_peak_2923
chr14	500384	500871	488	445.8	28.251	1.71113	27.0005	.//_peak_841
chr9	751024	751513	490	303.91	18.7511	1.71113	17.5886	.//_peak_2971
chr21	470924	471874	951	287.92	20.614	1.71112	19.4613	.//_peak_1624
chr25	126410	126733	324	516.78	31.7732	1.71101	30.4849	.//_peak_1720
chr10	145285	147218	1934	408.49	27.8662	1.71059	26.6366	.//_peak_211
chr5	1207113	1207420	308	402.44	24.4762	1.71057	23.2544	.//_peak_2365
chr4	1286976	1289023	2048	358.48	24.6157	1.71025	23.4228	.//_peak_2160
chr26	50577	53137	2561	773.28	53.3654	1.70995	51.946	.//_peak_1730
chr7	517769	518451	683	529.49	31.6877	1.70946	30.3963	.//_peak_2692
chr9	1095938	1096453	516	488.65	32.5424	1.70929	31.2672	.//_peak_3020
chr2	777351	777873	523	338.99	21.5781	1.70859	20.3948	.//_peak_1404
chr26	46511	49033	2523	780.04	52.6691	1.70803	51.2495	.//_peak_1729
chr1	1665763	1666093	331	568.95	34.9874	1.7078	33.6732	.//_peak_178
chr7	209685	210730	1046	740.32	63.9464	1.70766	62.5248	.//_peak_2645
chr13	499083	499653	571	348.96	25.8419	1.70756	24.6496	.//_peak_700
chr8	558212	558830	619	573.1	35.3718	1.7075	34.0577	.//_peak_2821
chr9	983483	984917	1435	438.98	31.8536	1.70707	30.6026	.//_peak_3009
chr4	1228865	1229270	406	382.18	25.0632	1.70705	23.851	.//_peak_2149
chr4	196258	197872	1615	384.21	27.767	1.70664	26.5604	.//_peak_1997
chr10	761887	763177	1291	414.38	28.0322	1.70646	26.8124	.//_peak_297
chr24	270223	274119	3897	283.71	18.2497	1.70641	17.1031	.//_peak_1709
chr10	1108856	1109458	603	332.57	20.3216	1.70619	19.1438	.//_peak_343
chr18	567499	569809	2311	351.25	26.4373	1.70595	25.2409	.//_peak_1258
chr3	1387521	1387994	474	373.78	23.6726	1.70501	22.4675	.//_peak_1917
chr11	550155	553504	3350	506.55	33.3035	1.70477	32.0206	.//_peak_437
chr6	1087706	1089146	1441	395.24	27.5368	1.70461	26.3146	.//_peak_2562
chr11	476973	479357	2385	535.16	43.3427	1.7043	42.0303	.//_peak_429
chr10	1115978	1116344	367	431.83	27.1879	1.70379	25.9472	.//_peak_345
chr17	215188	219515	4328	535.98	41.7096	1.70337	40.4246	.//_peak_1144
chr6	1306027	1306780	754	330.52	24.8355	1.70334	23.6542	.//_peak_2586
chr16	243594	247088	3495	438.31	30.4694	1.70217	29.2227	.//_peak_1052
chr9	1211653	1212406	754	618.32	37.4812	1.70171	36.1476	.//_peak_3036
chr2	774829	775978	1150	546.52	32.652	1.70122	31.3552	.//_peak_1403
chr10	370911	371442	532	361.02	22.0099	1.70057	20.8156	.//_peak_243
chr7	230434	231131	698	488.85	31.4243	1.70051	30.1551	.//_peak_2648
chr5	1346298	1350480	4183	375.71	26.9414	1.70005	25.7355	.//_peak_2384
chr17	551627	552621	995	343.56	23.4435	1.70003	22.2566	.//_peak_1180
chr5	1033446	1033935	490	331.25	21.3603	1.69872	20.1841	.//_peak_2346
chr1	1347602	1350326	2725	376.78	28.1316	1.69846	26.9285	.//_peak_145
chr5	526304	526801	498	378.18	25.7359	1.69838	24.5292	.//_peak_2265
chr5	727423	728725	1303	375.11	25.0651	1.69829	23.8595	.//_peak_2295
chr7	767456	769289	1834	484.9	40.89	1.69804	39.6181	.//_peak_2726
chr9	576314	576857	544	369.76	26.2343	1.69795	25.0314	.//_peak_2948
chr1	568903	569438	536	294.09	19.805	1.6979	18.654	.//_peak_41
chr16	589622	591686	2065	349.73	23.6093	1.69694	22.4357	.//_peak_1090
chr9	1209823	1210152	330	414.35	25.5148	1.6967	24.2901	.//_peak_3035
chr15	266509	267153	645	442.09	27.3039	1.69658	26.0656	.//_peak_949
chr17	22099	25999	3901	496.28	37.0472	1.69654	35.7849	.//_peak_1120
chr13	736062	736712	651	409.46	27.3229	1.69624	26.0985	.//_peak_729
chr1	1327239	1327561	323	299.18	18.1199	1.69616	16.9666	.//_peak_141
chr2	125495	127839	2345	391.28	25.4566	1.69611	24.2431	.//_peak_1318
chr3	806258	807999	1742	433.81	32.4988	1.6961	31.2538	.//_peak_1840
chr4	803890	805413	1524	348.07	23.2818	1.69571	22.0972	.//_peak_2083
chr10	407368	407896	529	354.76	22.4146	1.69532	21.2233	.//_peak_248
chr1	1359841	1363662	3822	445.9	27.1068	1.6953	25.8659	.//_peak_147
chr17	203507	203831	325	421.32	25.2259	1.69508	23.9975	.//_peak_1143
chr5	393042	398012	4971	401.27	26.8516	1.69507	25.6558	.//_peak_2249
chr19	432877	433272	396	281.81	18.0671	1.69503	16.9259	.//_peak_1299
chr24	150119	151552	1434	305.75	18.664	1.69499	17.5068	.//_peak_1695
chr5	476576	479603	3028	366.54	23.3405	1.69489	22.1426	.//_peak_2262
chr14	354369	356693	2325	618.33	35.7152	1.69482	34.3939	.//_peak_828
chr7	1230799	1231149	351	310.89	18.9394	1.69463	17.7784	.//_peak_2768
chr5	452931	453536	606	432.62	26.2573	1.6945	25.0223	.//_peak_2258
chr13	25646	27155	1510	282.67	19.3027	1.69446	18.161	.//_peak_639
chr9	174623	175354	732	473.15	28.2921	1.69441	27.0357	.//_peak_2890
chr16	58598	58963	366	349.63	21.62	1.69397	20.4356	.//_peak_1035
chr4	1210034	1211409	1376	467.27	28.5508	1.69387	27.3114	.//_peak_2144
chr5	926392	927991	1600	342.41	24.0647	1.69382	22.8786	.//_peak_2328
chr5	680329	681814	1486	351.06	22.4837	1.69381	21.2957	.//_peak_2288
chr9	859212	861334	2123	455.71	31.2829	1.69331	30.0275	.//_peak_2985
chr11	83802	86733	2932	445.36	32.1999	1.6933	30.9568	.//_peak_365
chr6	1058521	1059285	765	305.9	21.1044	1.69319	19.9475	.//_peak_2557
chr6	398444	399036	593	434.21	30.1098	1.69305	28.8698	.//_peak_2454
chr7	888819	889272	454	328.37	19.9963	1.6929	18.825	.//_peak_2744
chr1	973118	974240	1123	405.55	25.3625	1.69268	24.144	.//_peak_95
chr8	18934	24830	5897	373.62	23.9979	1.69267	22.7971	.//_peak_2778
chr5	636755	637103	349	338.62	20.8423	1.69234	19.663	.//_peak_2280
chr6	861150	867164	6015	356.14	22.3759	1.6922	21.1888	.//_peak_2530
chr2	225165	227161	1997	362	23.9721	1.69218	22.7771	.//_peak_1330
chr6	1400005	1400315	311	418.48	24.6888	1.69216	23.4645	.//_peak_2597
chr23	184673	185890	1218	485.11	39.7739	1.6921	38.4968	.//_peak_1674
chr2	884651	886050	1400	317.19	18.991	1.69185	17.8282	.//_peak_1422
chr12	966587	968687	2101	286.56	18.8281	1.69184	17.6842	.//_peak_616
chr26	30117	32663	2547	763.96	51.0568	1.69171	49.6544	.//_peak_1725
chr14	236667	237348	682	440.65	26.6169	1.69152	25.3805	.//_peak_813
chr15	207047	208430	1384	431.61	27.1708	1.6912	25.9399	.//_peak_941
plasmid	1492	1869	378	28822.6	1727.42	1.69115	1724.08	.//_peak_3047
chr7	164522	165339	818	651.87	41.4753	1.69096	40.1304	.//_peak_2638
chr2	165386	166269	884	309.88	20.1936	1.69075	19.0363	.//_peak_1324
chr13	553522	553850	329	339.31	20.29	1.69069	19.1148	.//_peak_708
chr1	53675	54022	348	280.91	17.3985	1.68967	16.2602	.//_peak_4
chr15	331742	333488	1747	530.7	31.8772	1.68952	30.5946	.//_peak_962
chr7	612975	613782	808	583.97	33.4018	1.68869	32.0971	.//_peak_2705
chr7	1221485	1221969	485	375.24	22.6587	1.68867	21.4583	.//_peak_2767
chr2	234102	234587	486	369.07	22.7526	1.68806	21.5567	.//_peak_1331
chr5	1482634	1483635	1002	621.47	36.6896	1.68805	35.3778	.//_peak_2402
chr29	40298	40622	325	280.59	16.937	1.68772	15.7997	.//_peak_1745
chr2	817899	818675	777	561.48	32.8493	1.68753	31.553	.//_peak_1410
chr13	294033	294362	330	298.61	18.3928	1.68715	17.2451	.//_peak_671
chr1	921122	922218	1097	431.49	26.8587	1.68677	25.6294	.//_peak_87
chr5	43564	47656	4093	340.01	21.9219	1.68666	20.747	.//_peak_2206
chr4	138128	142122	3995	357.19	26.2889	1.68657	25.1102	.//_peak_1987
chr4	356068	357305	1238	344.95	22.1943	1.68628	21.0147	.//_peak_2019
chr6	194146	194480	335	327.17	20.1674	1.68578	18.9992	.//_peak_2431
chr2	1117235	1119121	1887	706.47	44.8908	1.68465	43.5349	.//_peak_1453
chr10	426225	426727	503	448.57	27.2194	1.68437	25.9901	.//_peak_251
chr4	1583276	1583666	391	334.85	20.927	1.68427	19.7534	.//_peak_2202
chr4	1553452	1553819	368	325.79	19.7289	1.68377	18.5623	.//_peak_2195
chr10	242745	243671	927	437.2	29.4349	1.68373	28.1996	.//_peak_225
chr2	1201929	1203040	1112	320.99	23.6976	1.68362	22.5326	.//_peak_1468
chr3	44733	45136	404	569.56	34.2	1.68346	32.902	.//_peak_1751
chr12	478047	485390	7344	310.73	20.3737	1.68331	19.2165	.//_peak_563
chr3	1209284	1214240	4957	378.14	22.6942	1.68303	21.4984	.//_peak_1889
chr1	1387167	1390887	3721	410.4	30.242	1.68275	29.0218	.//_peak_151
chr14	835286	837480	2195	575.13	39.3218	1.68259	38.0144	.//_peak_887
chr8	12426	16520	4095	335.09	21.3356	1.68241	20.1633	.//_peak_2777
chr5	1010179	1013216	3038	301.81	19.0712	1.68238	17.924	.//_peak_2342
chr7	731649	732238	590	481.8	29.298	1.68219	28.0391	.//_peak_2719
chr10	69978	70931	954	413.5	25.9365	1.68208	24.7161	.//_peak_202
chr4	515539	516400	862	363.63	25.0233	1.68198	23.8332	.//_peak_2042
chr8	183771	185949	2179	291.88	18.1357	1.68166	16.9929	.//_peak_2786
chr4	793027	795458	2432	471.2	30.8752	1.68157	29.6221	.//_peak_2082
chr5	555869	556187	319	305.75	18.7834	1.68148	17.6316	.//_peak_2268
chr10	751146	753574	2429	449.2	26.6695	1.68146	25.4454	.//_peak_295
chr2	1444283	1444610	328	338.53	20.2734	1.6812	19.1007	.//_peak_1497
chr20	432455	435437	2983	403.62	23.2349	1.681	22.0282	.//_peak_1573
chr13	289164	291478	2315	303.46	18.2702	1.68091	17.1278	.//_peak_670
chr5	307496	307810	315	375	22.1566	1.68051	20.9622	.//_peak_2238
chr12	597732	599827	2096	288.51	18.4768	1.68048	17.3364	.//_peak_583
chr15	687449	687798	350	462.14	28.5149	1.68013	27.2695	.//_peak_1000
chr2	525652	526973	1322	448.47	28.6221	1.67986	27.3858	.//_peak_1373
chr7	495325	496719	1395	279.27	17.1963	1.67981	16.0625	.//_peak_2687
chr10	1171198	1172080	883	424.86	24.121	1.6794	22.8994	.//_peak_352
chr11	1031373	1034707	3335	372.32	25.435	1.67938	24.2394	.//_peak_496
chr12	1149435	1151129	1695	377.54	24.47	1.6787	23.2679	.//_peak_635
chr16	191026	191676	651	311.17	18.3738	1.67855	17.2194	.//_peak_1046
chr4	1086668	1087910	1243	336.01	23.7407	1.67841	22.5687	.//_peak_2127
chr10	886749	888963	2215	327.48	19.8608	1.67773	18.6969	.//_peak_316
chr4	454093	454988	896	365.87	23.1986	1.67758	22.0097	.//_peak_2034
chr4	382650	385253	2604	362.75	23.004	1.67752	21.8176	.//_peak_2023
chr18	88832	91258	2427	447.09	25.5996	1.6775	24.3749	.//_peak_1207
chr26	54700	57219	2520	771.8	48.3133	1.67687	46.9196	.//_peak_1731
chr20	154849	155159	311	420.14	24.2961	1.67675	23.077	.//_peak_1538
chr23	329483	333168	3686	354.86	26.0688	1.67642	24.881	.//_peak_1690
chr2	1089285	1091651	2367	408.23	25.0672	1.67626	23.8582	.//_peak_1447
chr5	1499468	1501344	1877	278.66	18.5292	1.67615	17.3971	.//_peak_2406
chr6	1487919	1488255	337	660.39	38.5732	1.67591	37.234	.//_peak_2615
chr1	1169525	1172952	3428	384.13	23.1799	1.67588	21.9825	.//_peak_119
chr24	243121	244882	1762	278.58	18.8757	1.67567	17.7444	.//_peak_1706
chr18	185485	186600	1116	349.92	21.1945	1.67562	20.0169	.//_peak_1217
chr4	686872	692152	5281	285.56	21.3289	1.67556	20.1951	.//_peak_2067
chr26	18628	24487	5860	705.91	43.1314	1.67553	41.7792	.//_peak_1723
chr4	1502341	1504090	1750	363.83	23.9513	1.67529	22.7668	.//_peak_2190
chr1	1152121	1152575	455	288.92	17.077	1.67495	15.9396	.//_peak_116
chr2	1302008	1307015	5008	430.58	29.4416	1.67468	28.2138	.//_peak_1482
chr13	894428	894767	340	334.4	20.2182	1.67406	19.0497	.//_peak_753
chr6	590394	591047	654	320.09	19.66	1.67389	18.503	.//_peak_2485
chr17	624159	624464	306	283.8	17.1311	1.6729	15.9976	.//_peak_1186
chr9	514755	517816	3062	364.12	21.3641	1.67235	20.1864	.//_peak_2941
chr4	236036	240505	4470	423.49	27.4986	1.67231	26.2939	.//_peak_2004
chr2	286709	287581	873	284.91	18.4137	1.67214	17.2777	.//_peak_1338
chr16	317782	319345	1564	428.27	28.5776	1.67202	27.3536	.//_peak_1063
chr6	151838	152195	358	315.9	18.4729	1.67189	17.3173	.//_peak_2427
chr14	833417	833758	342	639.76	37.1788	1.67183	35.8511	.//_peak_886
chr1	1215531	1215887	357	315.7	18.3853	1.6714	17.233	.//_peak_124
chr3	402495	402994	500	286.82	17.1545	1.67113	16.0185	.//_peak_1800
chr14	134028	139421	5394	416.46	25.9973	1.67084	24.7818	.//_peak_798
chr13	334203	335942	1740	340.06	20.7618	1.67066	19.5909	.//_peak_676
chr1	1191646	1193710	2065	293.14	18.3759	1.67034	17.2382	.//_peak_122
chr5	677835	678865	1031	485.99	28.444	1.67033	27.1949	.//_peak_2287
chr2	685517	685855	339	324.65	19.2618	1.66957	18.1011	.//_peak_1393
chr16	676645	678825	2181	365.49	22.3536	1.66947	21.1698	.//_peak_1100
chr12	952511	953080	570	344.33	21.289	1.66927	20.1154	.//_peak_615
chr13	165881	167994	2114	295.88	18.3115	1.66917	17.1707	.//_peak_655
chr7	139896	140199	304	594.65	33.6164	1.66882	32.3133	.//_peak_2633
chr14	1024114	1024418	305	405.35	22.6732	1.66859	21.4699	.//_peak_914
chr1	1731139	1733057	1919	709.93	43.4319	1.66856	42.0791	.//_peak_185
chr3	246304	247886	1583	370.43	22.1996	1.66789	21.0145	.//_peak_1780
chr10	754956	755665	710	393.44	23.3997	1.66775	22.1982	.//_peak_296
chr4	359490	359808	319	369.98	21.4964	1.66764	20.31	.//_peak_2020
chr8	476898	478679	1782	428.27	24.3741	1.66738	23.1873	.//_peak_2813
chr7	1071375	1074634	3260	404.02	25.3151	1.66736	24.1076	.//_peak_2754
chr14	813049	813382	334	461.12	26.2783	1.6673	25.0418	.//_peak_884
chr26	34210	36757	2548	756.09	47.4605	1.66726	46.0797	.//_peak_1726
chr13	405048	405467	420	476.62	27.8578	1.66725	26.6115	.//_peak_687
chr13	172844	173406	563	277.17	15.8489	1.66721	14.7219	.//_peak_656
chr8	362	3485	3124	336.93	20.4929	1.66687	19.3277	.//_peak_2775
chr12	74123	74664	542	312.27	19.0503	1.6668	17.8975	.//_peak_520
chr12	127964	128450	487	417.42	25.148	1.6663	23.9364	.//_peak_526
chr6	495847	498261	2415	430.99	30.0022	1.66628	28.7739	.//_peak_2470
chr6	311617	313469	1853	479.65	27.6597	1.66596	26.4118	.//_peak_2442
chr8	1027803	1028948	1146	500	28.5677	1.66526	27.3271	.//_peak_2867
chr1	1025277	1026945	1669	345.51	23.4619	1.6652	22.2841	.//_peak_102
chr6	1380607	1380996	390	377.89	22.5808	1.66471	21.391	.//_peak_2594
chr6	420228	421028	801	372.34	21.346	1.66451	20.1602	.//_peak_2457
chr4	902157	902887	731	311.85	18.4983	1.66443	17.3498	.//_peak_2099
chr15	776997	777872	876	476.95	25.6387	1.66412	24.4022	.//_peak_1012
chr5	312646	315165	2520	325.17	19.2626	1.66407	18.1052	.//_peak_2239
chr8	732199	733186	988	329.92	19.2217	1.66398	18.0631	.//_peak_2844
chr2	504781	508023	3243	388.84	24.7459	1.66368	23.5483	.//_peak_1371
chr10	922746	925976	3231	485.25	27.6718	1.66307	26.4337	.//_peak_321
chr5	213838	214992	1155	372.87	22.3455	1.66297	21.1587	.//_peak_2228
chr14	374462	375750	1289	300.08	17.6152	1.66292	16.4757	.//_peak_829
chr11	812839	814784	1946	425.47	24.8302	1.66269	23.616	.//_peak_469
chr7	132118	132834	717	457.93	26.8735	1.66189	25.642	.//_peak_2632
chr4	190180	190752	573	389.01	23.0301	1.66184	21.8342	.//_peak_1995
chr4	1141132	1142249	1118	584.51	30.8489	1.66158	29.562	.//_peak_2135
chr9	931711	932035	325	359.96	20.4529	1.66157	19.2764	.//_peak_2998
chr6	731419	734112	2694	298.71	18.2086	1.66131	17.0693	.//_peak_2507
chr20	65613	66841	1229	584.2	37.3781	1.66081	36.1045	.//_peak_1525
chr1	1112220	1113626	1407	373.78	23.4677	1.66079	22.2851	.//_peak_113
chr23	103327	104101	775	344.62	21.4281	1.66042	20.2626	.//_peak_1660
chr2	208029	209311	1283	383.35	22.6979	1.66032	21.5067	.//_peak_1329
chr5	216427	218731	2305	563.64	30.9704	1.65996	29.6891	.//_peak_2229
chr13	33330	35087	1758	313.03	20.9627	1.65993	19.8133	.//_peak_640
chr5	1409085	1409635	551	287.94	16.4389	1.65976	15.3071	.//_peak_2394
chr14	343907	345303	1397	479.1	31.4768	1.65849	30.228	.//_peak_826
chr15	89018	90197	1180	594.07	39.4529	1.65841	38.1463	.//_peak_931
chr17	69627	69935	309	523.69	30.017	1.6584	28.7542	.//_peak_1125
chr2	1561004	1561345	342	297.69	17.0092	1.65822	15.8713	.//_peak_1509
chr5	850759	853985	3227	346.55	21.6879	1.65811	20.5204	.//_peak_2317
chr7	851738	855655	3918	416.47	26.2624	1.65808	25.0566	.//_peak_2737
chr3	1280190	1280514	325	414.92	23.4239	1.6577	22.2173	.//_peak_1898
chr3	888003	890000	1998	306.43	17.7868	1.65769	16.6431	.//_peak_1845
chr3	90794	92185	1392	317.26	18.3401	1.65751	17.1903	.//_peak_1759
chr17	615860	616470	611	360.9	21.8464	1.65687	20.677	.//_peak_1185
chr3	1347219	1349173	1955	490.2	30.3116	1.65684	29.0638	.//_peak_1912
chr4	678520	678996	477	407.1	23.6253	1.65683	22.4228	.//_peak_2065
chr9	327629	329045	1417	384.3	21.7474	1.6568	20.5592	.//_peak_2914
chr10	1121441	1127980	6540	316.01	21.1348	1.65667	19.9849	.//_peak_346
chr10	469892	470828	937	396.89	22.2765	1.65664	21.0825	.//_peak_256
chr32	39494	40510	1017	392.48	24.362	1.65634	23.1645	.//_peak_1954
chr10	719697	720014	318	296.61	17.0397	1.65595	15.9047	.//_peak_288
chr2	1263096	1265321	2226	496.37	30.765	1.65586	29.5126	.//_peak_1477
chr13	483080	487742	4663	355.39	20.5172	1.65585	19.3562	.//_peak_696
chr8	146685	148081	1397	404.34	23.1769	1.65569	21.9759	.//_peak_2785
chr4	4646	5216	571	530.41	32.6298	1.65556	31.3605	.//_peak_1970
chr4	296310	297144	835	459.36	24.2363	1.65531	23.0126	.//_peak_2011
chr3	946338	947033	696	437.15	24.0306	1.65489	22.8146	.//_peak_1854
chr12	533882	534246	365	380.65	21.7364	1.65486	20.5497	.//_peak_573
chr17	701969	705721	3753	459.16	28.17	1.65449	26.9396	.//_peak_1189
chr9	345278	346179	902	373.36	22.1578	1.65444	20.9809	.//_peak_2916
chr23	162200	165582	3383	275.88	15.7591	1.65373	14.6378	.//_peak_1670
chr15	553220	553599	380	294.01	17.0018	1.65364	15.8682	.//_peak_988
chr22	411080	415845	4766	524.78	47.8054	1.65339	46.5352	.//_peak_1647
chr3	468991	469326	336	311.04	17.3926	1.65226	16.2501	.//_peak_1806
chr4	127538	128767	1230	524.91	33.7628	1.65167	32.4904	.//_peak_1985
chr4	1012732	1013202	471	288.64	16.1686	1.65165	15.0403	.//_peak_2117
chr9	951248	951868	621	419.76	24.3683	1.65154	23.1614	.//_peak_3001
chr1	662558	664128	1571	338.57	19.9344	1.65147	18.7741	.//_peak_52
chr3	1599102	1602436	3335	359.32	19.7181	1.65147	18.5516	.//_peak_1939
chr13	175445	177029	1585	274.51	15.9552	1.65131	14.8359	.//_peak_657
chr4	944806	945215	410	335.67	19.7434	1.65112	18.5837	.//_peak_2105
chr20	294319	294884	566	742.98	42.106	1.65065	40.7452	.//_peak_1554
chr6	50868	54349	3482	331.98	20.8215	1.65059	19.663	.//_peak_2413
chr11	455623	464959	9337	340.49	21.0658	1.65035	19.9096	.//_peak_427
chr9	847451	847825	375	488.66	27.3293	1.6501	26.0877	.//_peak_2982
chr5	418502	420757	2256	331.18	22.6266	1.6492	21.4648	.//_peak_2252
chr8	5930	10019	4090	330.79	19.7977	1.64709	18.6425	.//_peak_2776
chr23	312943	316880	3938	349.04	25.139	1.6469	23.9664	.//_peak_1688
chr6	62191	62742	552	567.11	34.4327	1.64688	33.1485	.//_peak_2416
chr8	1038829	1040560	1732	595.84	33.1748	1.64685	31.9001	.//_peak_2869
chr23	201279	201722	444	587.27	33.7749	1.64623	32.4839	.//_peak_1676
chr26	58687	61302	2616	750.99	46.9474	1.646	45.5798	.//_peak_1732
chr5	387452	388180	729	285.39	18.6034	1.64563	17.4765	.//_peak_2248
chr29	19961	20265	305	330.13	18.0315	1.64504	16.8794	.//_peak_1742
chr7	217252	220403	3152	491.25	39.0888	1.64431	37.8474	.//_peak_2646
chr3	30897	31709	813	385.22	22.8288	1.64376	21.6461	.//_peak_1748
chr10	325221	325794	574	306.05	17.0952	1.64375	15.9575	.//_peak_235
chr2	876870	878930	2061	496.12	29.2632	1.64373	28.0255	.//_peak_1421
chr9	1026694	1031853	5160	417.33	27.1062	1.64364	25.9144	.//_peak_3013
chr11	653516	654188	673	490.09	28.2503	1.64361	27.0155	.//_peak_449
chr6	755248	762986	7739	343.83	20.973	1.64359	19.8148	.//_peak_2513
chr6	118216	119664	1449	335.73	18.5311	1.64341	17.3764	.//_peak_2425
chr14	313060	313618	559	500.75	27.6992	1.64321	26.4546	.//_peak_822
chr2	472902	477543	4642	393.74	24.3839	1.64296	23.2134	.//_peak_1366
chr3	1148233	1148647	415	422.13	23.4303	1.64278	22.2282	.//_peak_1883
chr17	103595	106340	2746	688.73	39.0624	1.64266	37.7398	.//_peak_1130
chr13	1045773	1049060	3288	366.52	23.407	1.64106	22.2302	.//_peak_778
chr16	296832	297896	1065	358.68	20.5709	1.64103	19.4043	.//_peak_1059
chr16	287256	292384	5129	489.67	28.5357	1.64081	27.2976	.//_peak_1058
chr12	412292	412988	697	276.87	15.567	1.64005	14.4514	.//_peak_556
chr2	541882	544457	2576	352.8	19.3898	1.63998	18.2265	.//_peak_1376
chr15	488920	489584	665	1057.36	58.1386	1.6396	56.672	.//_peak_982
chr4	520370	521807	1438	356.75	19.2317	1.6396	18.0698	.//_peak_2043
chr3	370744	372664	1921	355.21	23.075	1.63957	21.9036	.//_peak_1795
chr11	249589	250592	1004	929.22	48.4406	1.63956	47.0185	.//_peak_391
chr2	938213	939900	1688	344.57	19.6252	1.63936	18.4687	.//_peak_1427
chr15	779249	781460	2212	440.78	29.8124	1.63928	28.595	.//_peak_1013
chr8	200357	201326	970	304.67	16.7948	1.63874	15.6623	.//_peak_2789
chr7	1218129	1218434	306	349.97	19.7082	1.63855	18.5462	.//_peak_2766
chr14	337828	338253	426	493.66	27.1513	1.63789	25.9139	.//_peak_825
chr10	848566	851132	2567	434.23	23.601	1.63775	22.4018	.//_peak_312
chr12	568623	569246	624	329.56	17.7979	1.63764	16.6505	.//_peak_580
chr6	768505	772087	3583	365.44	21.9769	1.63728	20.8161	.//_peak_2515
chr1	272587	273228	642	272.15	15.3347	1.63713	14.2216	.//_peak_19
chr13	491745	492079	335	273.43	15.2101	1.63698	14.0971	.//_peak_698
chr13	442573	443745	1173	308.85	17.9364	1.63598	16.816	.//_peak_692
chr2	772148	772519	372	309.66	16.8469	1.63555	15.7104	.//_peak_1402
chr14	526774	527140	367	473.62	26.1284	1.63548	24.901	.//_peak_847
chr3	65345	68555	3211	373.26	23.5266	1.63505	22.356	.//_peak_1756
chr20	55819	56777	959	739.87	51.8662	1.63502	50.499	.//_peak_1523
chr2	1641808	1643203	1396	281.43	15.4296	1.63493	14.3115	.//_peak_1518
chr8	863136	867010	3875	415.42	24.2711	1.6347	23.0808	.//_peak_2855
chr19	178092	179287	1196	1024.05	59.1705	1.63462	57.7429	.//_peak_1280
chr14	30539	30849	311	371.92	19.4565	1.63393	18.2899	.//_peak_785
chr17	52570	53753	1184	610.58	31.2748	1.63337	29.9897	.//_peak_1123
chr12	703060	703398	339	271.45	15.0004	1.63296	13.8902	.//_peak_596
chr12	687952	688428	477	274.09	14.9317	1.63278	13.8199	.//_peak_594
chr3	262979	264318	1340	376.15	20.2052	1.63256	19.0381	.//_peak_1784
chr16	633092	633401	310	418.98	22.2626	1.63205	21.0662	.//_peak_1096
chr14	352526	352935	410	420.51	22.753	1.63203	21.5562	.//_peak_827
chr11	390962	393818	2857	391.87	23.9064	1.63187	22.7317	.//_peak_414
chr12	693242	694070	829	465.63	25.7315	1.63182	24.5391	.//_peak_595
chr16	714138	715065	928	311.79	16.5708	1.63174	15.4406	.//_peak_1103
chr23	71123	71830	708	546.63	28.3898	1.63162	27.1325	.//_peak_1657
chr8	1031447	1032600	1154	499.21	27.2779	1.6315	26.0544	.//_peak_2868
chr1	90637	91285	649	327.2	18.2811	1.63146	17.1344	.//_peak_7
chr16	888081	890094	2014	356.18	19.0096	1.63126	17.8519	.//_peak_1116
chr22	461683	463409	1727	639.82	33.9842	1.63079	32.6969	.//_peak_1648
chr6	110324	111251	928	439.15	29.8919	1.63026	28.679	.//_peak_2423
chr2	962420	963746	1327	344.89	19.9145	1.62979	18.7592	.//_peak_1430
chr7	62519	62863	345	327.56	18.2174	1.62942	17.0737	.//_peak_2621
chr4	1054497	1055177	681	414.1	22.0976	1.62868	20.9046	.//_peak_2124
chr23	158830	160493	1664	818.09	50.4935	1.62845	49.1107	.//_peak_1669
chr26	42394	44938	2545	762.41	44.5658	1.62841	43.209	.//_peak_1728
chr15	45688	46106	419	477.19	26.3165	1.62829	25.0901	.//_peak_924
chr3	1074791	1075535	745	324.91	17.882	1.62799	16.7416	.//_peak_1870
chr5	1563163	1564213	1051	316.67	21.4674	1.62797	20.3273	.//_peak_2409
chr6	59683	60379	697	477.72	24.7792	1.62734	23.5584	.//_peak_2415
chr2	101968	105837	3870	365.06	21.4495	1.6272	20.2885	.//_peak_1315
chr2	1508928	1509242	315	270.47	14.2898	1.62706	13.1828	.//_peak_1506
chr12	949612	950983	1372	278.76	16.4362	1.62685	15.326	.//_peak_614
chr5	1126055	1126803	749	350.74	19.5385	1.62683	18.3823	.//_peak_2357
chr18	50995	53045	2051	374.45	20.8057	1.62636	19.6408	.//_peak_1204
chr11	816677	821847	5171	637.59	34.504	1.62635	33.2122	.//_peak_470
chr6	594072	595536	1465	280.83	15.4472	1.62632	14.3334	.//_peak_2486
chr6	609190	610092	903	280.92	15.9671	1.62608	14.8534	.//_peak_2489
chr7	723346	725010	1665	340.97	19.072	1.62565	17.9222	.//_peak_2717
chr3	1362814	1366321	3508	611.21	32.7269	1.6256	31.4526	.//_peak_1914
chr14	81428	84667	3240	365.75	19.6238	1.62534	18.4668	.//_peak_791
chr15	14121	14428	308	437.76	22.8749	1.62483	21.673	.//_peak_918
chr4	351659	352633	975	366.77	19.9824	1.62449	18.8161	.//_peak_2018
chr4	53632	59293	5662	359.2	18.9353	1.62435	17.7791	.//_peak_1976
chr1	81497	83001	1505	269.99	16.2431	1.62421	15.1372	.//_peak_6
chr10	879460	881041	1582	543.95	27.8124	1.62397	26.5764	.//_peak_314
chr3	1594414	1597816	3403	405.49	23.2694	1.62393	22.0863	.//_peak_1938
chr5	557652	558941	1290	381.97	23.3365	1.62349	22.1641	.//_peak_2269
chr14	475168	479881	4714	534.15	31.4096	1.62327	30.1594	.//_peak_837
chr21	376770	378986	2217	543.53	30.2336	1.62327	28.9823	.//_peak_1615
chr7	970522	971465	944	335.46	17.7239	1.62315	16.5889	.//_peak_2747
chr11	862434	863572	1139	465.87	24.6674	1.62276	23.4534	.//_peak_476
chr14	230193	230554	362	414.05	21.8165	1.62254	20.6269	.//_peak_812
chr11	537633	539242	1610	606.62	33.3028	1.6218	32.0172	.//_peak_436
chr17	236107	237747	1641	616.3	33.8362	1.62156	32.5498	.//_peak_1146
chr12	904744	912021	7278	361.73	21.4145	1.62118	20.2537	.//_peak_611
chr6	636344	636807	464	399.9	20.8707	1.62101	19.6895	.//_peak_2495
chr4	349542	350081	540	434.94	22.6265	1.62068	21.4265	.//_peak_2017
chr8	802481	808006	5526	619.85	32.9324	1.62039	31.6537	.//_peak_2850
chr12	1137735	1139414	1680	390.27	22.2665	1.62033	21.0852	.//_peak_634
chr2	484495	485511	1017	356.82	18.6239	1.62008	17.4725	.//_peak_1368
chr11	73859	76161	2303	572.45	31.7473	1.62007	30.4819	.//_peak_364
chr10	997521	998633	1113	370.38	21.1014	1.6197	19.9404	.//_peak_330
chr6	713933	716170	2238	409.88	21.0063	1.61957	19.8238	.//_peak_2504
chr21	158754	159130	377	484.49	25.6256	1.61955	24.401	.//_peak_1592
chr17	746581	747562	982	358.59	20.3466	1.61915	19.1895	.//_peak_1193
chr7	86888	87929	1042	718.67	39.3379	1.61891	38.0096	.//_peak_2626
chr12	539106	539579	474	315.4	18.3378	1.61815	17.2057	.//_peak_574
chr2	1661679	1662411	733	272.81	15.6961	1.61785	14.5906	.//_peak_1521
chr23	345488	349418	3931	339.07	22.6776	1.61774	21.5246	.//_peak_1692
chr13	79103	83907	4805	331.25	19.9929	1.61742	18.8503	.//_peak_644
chr14	864381	864696	316	410.85	21.165	1.61722	19.9812	.//_peak_892
chr5	1036837	1038772	1936	423.98	21.4838	1.61694	20.2982	.//_peak_2347
chr4	1216363	1216710	348	378.24	19.4985	1.61688	18.3337	.//_peak_2145
chr31	39662	39973	312	340.96	17.7173	1.61661	16.5714	.//_peak_1946
chr11	882886	883892	1007	610.42	30.175	1.61596	28.8975	.//_peak_478
chr10	773552	775047	1496	364.57	17.6654	1.61595	16.5219	.//_peak_298
chr7	531614	532046	433	500.77	26.9092	1.61575	25.6795	.//_peak_2695
chr18	592959	593531	573	368.57	18.7271	1.61569	17.5673	.//_peak_1262
chr1	1507803	1509968	2166	336.82	18.0615	1.61549	16.9204	.//_peak_161
chr2	965402	965909	508	309.41	16.6946	1.61503	15.5663	.//_peak_1431
chr13	858574	858900	327	338.47	17.3495	1.61494	16.2057	.//_peak_750
chr5	1015437	1015748	312	355.04	18.2756	1.61469	17.1231	.//_peak_2343
chr9	590056	590386	331	268.45	13.967	1.61464	12.8659	.//_peak_2950
chr14	631490	633394	1905	685.79	39.0479	1.61462	37.7475	.//_peak_861
chr3	1496262	1496573	312	347.67	18.1084	1.6144	16.9608	.//_peak_1927
chr2	1159397	1161279	1883	308.19	17.1587	1.61437	16.0335	.//_peak_1460
chr18	339157	342636	3480	286.53	15.9269	1.61408	14.8136	.//_peak_1236
chr2	1368884	1369221	338	279.31	14.4418	1.61402	13.3341	.//_peak_1489
chr5	356850	357277	428	343.68	17.9119	1.61364	16.7651	.//_peak_2244
chr11	618908	621285	2378	501.56	28.9043	1.61356	27.6778	.//_peak_444
chr16	415310	417677	2368	387.64	20.8763	1.61338	19.707	.//_peak_1073
chr11	142141	142495	355	341.78	17.5188	1.61304	16.3744	.//_peak_375
chr5	666709	667323	615	313.46	16.3809	1.61301	15.2514	.//_peak_2286
chr13	213205	215033	1829	404.51	25.7726	1.61246	24.5853	.//_peak_662
chr5	1360036	1360406	371	481.82	25.1711	1.61242	23.9524	.//_peak_2386
chr9	1058563	1063263	4701	322.13	23.4062	1.61242	22.2622	.//_peak_3017
chr21	280345	280675	331	409.76	20.6852	1.61224	19.5083	.//_peak_1601
chr11	1077153	1077710	558	281.71	14.0479	1.6119	12.9402	.//_peak_501
chr4	74628	75209	582	516.9	28.7567	1.61183	27.5204	.//_peak_1978
chr5	650896	655594	4699	373.73	20.8451	1.61175	19.6844	.//_peak_2284
chr7	485621	488051	2431	557.5	28.4421	1.61159	27.1922	.//_peak_2686
chr9	534479	534927	449	365.33	18.6418	1.61145	17.4872	.//_peak_2944
chr16	266163	270136	3974	453.93	24.0144	1.61138	22.813	.//_peak_1054
chr2	433074	434745	1672	403.71	24.8335	1.6105	23.6482	.//_peak_1361
chr11	17474	18472	999	426.01	24.4108	1.61009	23.2186	.//_peak_357
chr11	916127	916462	336	281.42	14.7569	1.61005	13.6487	.//_peak_482
chr8	910065	913446	3382	363.07	19.3893	1.60998	18.232	.//_peak_2858
chr9	583276	584473	1198	409.34	26.3131	1.6099	25.1308	.//_peak_2949
chr13	889189	890791	1603	338.29	18.7644	1.60988	17.6214	.//_peak_752
chr12	1052759	1053968	1210	400.34	22.2567	1.60972	21.0838	.//_peak_624
chr11	878853	879453	601	382.62	19.8289	1.60952	18.6645	.//_peak_477
chr9	1220974	1222128	1155	426.52	26.6828	1.6095	25.4888	.//_peak_3037
chr4	860163	863522	3360	352.23	17.6147	1.60926	16.4728	.//_peak_2094
chr4	543320	543634	315	382.84	19.7105	1.60909	18.5448	.//_peak_2049
chr1	734627	735578	952	267.43	13.8736	1.60886	12.7753	.//_peak_59
chr21	102461	103887	1427	434.65	25.9289	1.60872	24.7303	.//_peak_1585
chr9	878283	878856	574	422.66	22.5962	1.6083	21.4085	.//_peak_2989
chr19	69892	70951	1060	271.35	15.2862	1.60797	14.1859	.//_peak_1271
chr4	1444431	1445148	718	454	23.6533	1.60796	22.4509	.//_peak_2181
chr14	770641	772753	2113	295.44	21.4276	1.60785	20.3067	.//_peak_880
chr2	1123889	1125954	2066	326.59	17.546	1.60749	16.4212	.//_peak_1454
chr4	395549	396497	949	293.42	17.0418	1.60691	15.9244	.//_peak_2026
chr13	930198	932920	2723	350.55	20.1377	1.60615	18.9992	.//_peak_760
chr4	1021416	1022450	1035	329.62	16.7188	1.60603	15.5853	.//_peak_2120
chr4	1207863	1208275	413	431.41	22.622	1.60575	21.4306	.//_peak_2143
chr4	1322947	1323734	788	561.61	28.3685	1.60561	27.1329	.//_peak_2164
chr10	66453	66775	323	433.74	21.8014	1.6056	20.6112	.//_peak_201
chr15	103819	105464	1646	536.09	26.3372	1.60557	25.1295	.//_peak_933
chr9	1080605	1083486	2882	471.13	25.1469	1.60533	23.9445	.//_peak_3019
chr1	1709895	1711256	1362	522.05	26.7948	1.6043	25.5634	.//_peak_182
chr8	900913	908471	7559	384.67	31.6348	1.60406	30.4714	.//_peak_2857
chr9	833366	833729	364	514.12	26.3601	1.60368	25.1316	.//_peak_2980
chr6	98002	98883	882	364.89	22.2056	1.60358	21.045	.//_peak_2421
chr13	992562	992893	332	266.53	13.4801	1.60345	12.3846	.//_peak_767
chr11	131741	133541	1801	443.18	28.3626	1.60312	27.1698	.//_peak_373
chr1	801526	803931	2406	498.25	28.086	1.60301	26.8646	.//_peak_68
chr8	1240812	1242416	1605	276.83	14.5874	1.60273	13.4846	.//_peak_2876
chr17	740594	740906	313	360.73	18.3413	1.60251	17.1906	.//_peak_1192
chr2	513394	518034	4641	410.44	22.4141	1.6024	21.2623	.//_peak_1372
chr3	1429664	1430047	384	312.58	16.3157	1.60223	15.1923	.//_peak_1919
chr16	517202	518263	1062	343	19.2815	1.6016	18.1386	.//_peak_1082
chr9	296673	297080	408	319.03	16.3296	1.60159	15.2033	.//_peak_2908
chr26	178249	178562	314	333.18	16.5278	1.60145	15.3968	.//_peak_1734
chr11	124407	127164	2758	624.19	35.1105	1.60123	33.8831	.//_peak_371
chr4	392342	393515	1174	401.07	20.5508	1.60122	19.3851	.//_peak_2025
chr10	387000	390580	3581	399.15	23.7523	1.60109	22.5743	.//_peak_246
chr11	893680	893989	310	267.16	13.7885	1.60081	12.6936	.//_peak_479
chr9	592593	593012	420	297.68	15.1784	1.60075	14.0655	.//_peak_2951
chr9	622382	624013	1632	347.57	17.7756	1.60041	16.635	.//_peak_2955
chr8	931491	933853	2363	427.33	21.9804	1.59978	20.7947	.//_peak_2861
chr10	616390	617327	938	426.96	21.1794	1.59969	20.0005	.//_peak_274
chr5	1270360	1271501	1142	470.9	26.2209	1.59968	25.0176	.//_peak_2373
chr9	393835	397656	3822	414.17	22.8475	1.59918	21.6713	.//_peak_2924
chr6	656203	656890	688	286.02	15.391	1.59862	14.285	.//_peak_2497
chr2	1448245	1449933	1689	365.29	20.9137	1.59858	19.7655	.//_peak_1498
chr3	1516984	1518756	1773	391.25	19.9581	1.59782	18.7939	.//_peak_1928
chr11	509671	513422	3752	738.65	37.8361	1.59761	36.5227	.//_peak_432
chr2	626974	627749	776	421.4	20.4353	1.5975	19.258	.//_peak_1386
chr6	345477	349572	4096	315.29	17.7505	1.59702	16.6303	.//_peak_2447
chr6	1130562	1131301	740	278.39	13.9437	1.59695	12.844	.//_peak_2568
chr12	521837	522176	340	282.01	14.2646	1.59678	13.1618	.//_peak_570
chr10	344999	347200	2202	330.35	17.7411	1.5966	16.6146	.//_peak_239
chr17	229664	230638	975	552.65	31.2066	1.59654	29.963	.//_peak_1145
chr2	1371412	1374141	2730	418.3	21.712	1.59638	20.5438	.//_peak_1490
chr6	788812	789479	668	265.27	13.6116	1.59594	12.5199	.//_peak_2518
chr4	913660	916563	2904	278.55	15.3722	1.59592	14.2743	.//_peak_2101
chr5	986027	987241	1215	330.69	16.592	1.59536	15.4616	.//_peak_2336
chr6	1011136	1012509	1374	375.06	19.1323	1.59527	17.9768	.//_peak_2549
chr2	347273	348200	928	305.61	15.1389	1.59518	14.0235	.//_peak_1348
chr10	215935	218623	2689	415.76	22.6211	1.59509	21.4558	.//_peak_224
chr3	898665	900093	1429	265.13	13.4374	1.59505	12.3456	.//_peak_1846
chr5	1366647	1367982	1336	416.47	20.259	1.59493	19.0887	.//_peak_2388
chr32	32969	33299	331	385.68	19.6203	1.59482	18.4589	.//_peak_1953
chr3	920388	921632	1245	397.99	21.1965	1.59429	20.0293	.//_peak_1850
chr11	859553	860027	475	382.85	18.5678	1.59419	17.4103	.//_peak_475
chr14	592264	594629	2366	451.26	23.0702	1.59402	21.879	.//_peak_854
chr3	134099	135227	1129	402.49	19.2126	1.59345	18.0489	.//_peak_1764
chr15	807334	811990	4657	435.82	22.3136	1.59344	21.1456	.//_peak_1015
chr2	1127935	1128270	336	520.89	24.9866	1.59312	23.7681	.//_peak_1455
chr20	274818	282209	7392	434.53	32.4565	1.59293	31.2583	.//_peak_1552
chr3	1198338	1198783	446	688.23	34.3664	1.59267	33.0678	.//_peak_1888
chr24	159307	159670	364	264.71	13.9001	1.59258	12.8101	.//_peak_1697
chr19	429105	429428	324	264.63	13.7325	1.59206	12.6426	.//_peak_1298
chr6	1339062	1340033	972	808.25	38.6676	1.59177	37.3568	.//_peak_2589
chr12	890042	890483	442	474.85	24.7698	1.59167	23.5636	.//_peak_609
chr17	16280	18263	1984	312.63	15.577	1.59161	14.4598	.//_peak_1119
chr13	543223	543621	399	295.02	14.6427	1.59146	13.5342	.//_peak_707
chr2	120708	122996	2289	424.88	20.469	1.59145	19.294	.//_peak_1317
chr14	877545	879692	2148	558.57	30.4198	1.59124	29.186	.//_peak_895
chr6	626492	630204	3713	354.16	18.3014	1.59101	17.1689	.//_peak_2493
chr2	1081475	1081871	397	342.9	16.832	1.59099	15.6971	.//_peak_1445
chr1	1734855	1735926	1072	558.59	31.6258	1.59047	30.3874	.//_peak_186
chr17	538625	539304	680	414.96	19.6227	1.59023	18.4576	.//_peak_1177
chr13	125499	128337	2839	264.39	13.711	1.59012	12.6219	.//_peak_648
chr6	332361	332768	408	312.54	16.2072	1.58988	15.0894	.//_peak_2446
chr9	331671	332214	544	315.06	15.1254	1.58982	14.0065	.//_peak_2915
chr5	1146465	1146789	325	381.76	18.726	1.58954	17.5703	.//_peak_2359
chr11	419777	420242	466	361.37	18.0142	1.58932	16.8691	.//_peak_419
chr11	585961	588040	2080	458.04	23.5904	1.58868	22.395	.//_peak_440
chr3	394674	395036	363	391.87	19.0805	1.58867	17.9217	.//_peak_1798
chr7	108399	108884	486	409.57	20.4571	1.58867	19.2862	.//_peak_2628
chr7	1204982	1205334	353	323.98	15.6681	1.58798	14.545	.//_peak_2764
chr10	846729	847139	411	363.46	17.7941	1.58759	16.6498	.//_peak_311
chr9	1048468	1048841	374	366.23	17.6319	1.58757	16.4866	.//_peak_3014
chr10	791747	794778	3032	341.77	17.811	1.58743	16.6809	.//_peak_302
chr14	42112	45052	2941	348.98	16.6128	1.587	15.4874	.//_peak_786
chr23	53724	54385	662	561.86	25.5639	1.587	24.33	.//_peak_1656
chr16	872993	874783	1791	518.5	26.8357	1.58683	25.6082	.//_peak_1113
chr4	1267679	1268934	1256	372.86	17.7876	1.58659	16.6468	.//_peak_2156
chr2	1223380	1223720	341	521.78	24.3327	1.58629	23.1192	.//_peak_1471
chr5	1478817	1479133	317	311.96	15.1697	1.58607	14.0535	.//_peak_2401
chr7	692155	693377	1223	1007.92	55.8021	1.58595	54.4111	.//_peak_2714
chr3	306742	307108	367	266.14	12.7045	1.58574	11.6164	.//_peak_1789
chr7	274857	277520	2664	361.83	19.078	1.58559	17.9435	.//_peak_2654
chr15	721557	722442	886	434.35	21.0558	1.58551	19.878	.//_peak_1006
chr6	681206	684511	3306	353.23	20.4183	1.58544	19.2739	.//_peak_2502
chr9	1201642	1203352	1711	414.37	21.731	1.58506	20.5625	.//_peak_3033
chr8	551729	552341	613	308.31	16.5841	1.58465	15.4723	.//_peak_2819
chr4	1506076	1508076	2001	996.17	46.2819	1.58463	44.8796	.//_peak_2191
chr21	400349	402201	1853	536.39	24.3484	1.58445	23.136	.//_peak_1617
chr11	485419	486061	643	612.64	28.5281	1.58436	27.2677	.//_peak_430
chr14	87485	90259	2775	280.76	13.8132	1.58425	12.7219	.//_peak_792
chr1	1049122	1050185	1064	272.48	13.2438	1.58329	12.1527	.//_peak_105
chr3	475655	475988	334	403.6	19.798	1.58323	18.635	.//_peak_1807
chr16	95312	96186	875	403.56	18.7375	1.58258	17.5841	.//_peak_1037
chr2	1649648	1656936	7289	267.89	14.1011	1.58251	13.0122	.//_peak_1520
chr14	523992	524355	364	468.08	22.249	1.58224	21.061	.//_peak_846
chr14	171284	174034	2751	287.49	15.1234	1.58212	14.0265	.//_peak_802
chr2	1183427	1185065	1639	372.49	19.2948	1.58198	18.1441	.//_peak_1464
chr7	565741	566612	872	1221.08	61.6974	1.58167	60.2492	.//_peak_2699
chr5	855846	857984	2139	361.85	17.7702	1.5813	16.6355	.//_peak_2318
chr9	59599	60471	873	445.21	21.6064	1.58123	20.422	.//_peak_2880
chr12	562003	563526	1524	317.07	16.4251	1.58097	15.3096	.//_peak_577
chr4	112954	114698	1745	507.05	29.3987	1.58082	28.1889	.//_peak_1983
chr1	626794	629281	2488	405.98	18.8337	1.58075	17.6731	.//_peak_47
chr14	756651	757329	679	611.46	30.6314	1.58072	29.3696	.//_peak_878
chr6	705590	708537	2948	282.81	19.3402	1.58056	18.2369	.//_peak_2503
chr2	1000170	1000690	521	477.97	22.3537	1.58031	21.1565	.//_peak_1434
chr6	719438	719958	521	353.83	17.4991	1.57989	16.3613	.//_peak_2505
chr5	1574984	1576615	1632	542.15	25.1166	1.57953	23.914	.//_peak_2410
chr7	457783	460211	2429	656.73	29.812	1.57951	28.5688	.//_peak_2683
chr8	104374	106344	1971	439.98	21.2804	1.57929	20.1059	.//_peak_2781
chr15	608664	609484	821	263.24	12.4544	1.57859	11.3702	.//_peak_991
chr6	156690	159441	2752	319.12	16.3185	1.57856	15.1997	.//_peak_2428
chr19	166305	166680	376	355.57	17.732	1.5785	16.5942	.//_peak_1278
chr12	399264	400753	1490	332.07	18.5634	1.57838	17.4331	.//_peak_555
chr5	941826	942196	371	353.77	17.7289	1.57837	16.5915	.//_peak_2330
chr13	701358	701962	605	357.1	16.5131	1.57764	15.378	.//_peak_725
chr14	912012	912777	766	387.19	18.5379	1.57735	17.3865	.//_peak_900
chr12	683106	683411	306	321.46	15.2009	1.57721	14.086	.//_peak_593
chr15	308116	308950	835	546.73	26.7794	1.57711	25.5574	.//_peak_957
chr9	453211	453543	333	312.35	15.8726	1.57674	14.7599	.//_peak_2929
chr9	1266109	1269766	3658	527.77	29.3907	1.57651	28.1737	.//_peak_3044
chr5	586323	587277	955	326.87	16.2064	1.5763	15.0865	.//_peak_2272
chr33	6656	17415	10760	328.77	16.5492	1.57616	15.426	.//_peak_1956
chr23	129469	131607	2139	429.75	29.6627	1.5761	28.4666	.//_peak_1664
chr13	803318	803623	306	297.43	14.486	1.57583	13.3836	.//_peak_739
chr5	990792	994862	4071	426.94	22.2369	1.57546	21.0873	.//_peak_2337
chr6	909215	910820	1606	280.24	14.019	1.57541	12.9295	.//_peak_2534
chr7	871638	872383	746	347.94	17.5658	1.57465	16.4338	.//_peak_2740
chr25	20749	24009	3261	261.8	13.6849	1.57464	12.603	.//_peak_1717
chr11	632778	636112	3335	383.19	18.5629	1.57463	17.4199	.//_peak_446
chr33	21557	37696	16140	319.58	16.484	1.57389	15.3665	.//_peak_1957
chr33	40240	49433	9194	328.35	16.3859	1.57353	15.2636	.//_peak_1958
chr2	1628548	1638797	10250	271.62	13.5887	1.57345	12.5012	.//_peak_1517
chr10	1111184	1112241	1058	346.84	18.5349	1.57326	17.3998	.//_peak_344
chr9	316507	318976	2470	328.52	17.6613	1.5729	16.5472	.//_peak_2911
chr7	605113	605476	364	507.94	23.9675	1.57271	22.7601	.//_peak_2704
chr6	869190	869576	387	359.18	17.0669	1.57241	15.9319	.//_peak_2531
chr1	1714593	1715936	1344	562.92	27.4284	1.57238	26.1982	.//_peak_183
chr4	822621	823896	1276	355.64	16.4321	1.57223	15.3017	.//_peak_2087
chr16	540674	549227	8554	387.58	18.3958	1.57212	17.2525	.//_peak_1084
chr2	1256543	1257290	748	315.15	17.3127	1.57211	16.197	.//_peak_1476
chr4	182748	183089	342	276.42	12.9662	1.57211	11.8774	.//_peak_1993
chr6	1403997	1405561	1565	318.44	15.8784	1.57192	14.7652	.//_peak_2598
chr1	757357	758238	882	361.26	17.0968	1.57187	15.9613	.//_peak_63
chr13	1024666	1025055	390	352.92	17.1192	1.57185	15.9877	.//_peak_773
chr17	771046	771353	308	382.45	18.0147	1.57172	16.8677	.//_peak_1196
chr5	755906	756213	308	341.64	16.1011	1.57162	14.9768	.//_peak_2301
chr2	298008	302585	4578	320.15	17.4657	1.57158	16.3584	.//_peak_1340
chr9	362579	366311	3733	355.21	16.6615	1.57147	15.5299	.//_peak_2918
chr13	1019921	1021004	1084	269.33	12.6428	1.57146	11.5577	.//_peak_772
chr4	464187	466645	2459	359.75	19.3223	1.57146	18.1837	.//_peak_2035
chr14	166413	168112	1700	489.82	22.6666	1.57052	21.4731	.//_peak_801
chr5	1183135	1183471	337	293.44	13.551	1.57017	12.4529	.//_peak_2363
[truncated: 1,052 more rows]

## Sheet: Trial 2
Table S6. ChIP-seq for E. histolytica expressing HA-KERP2
Trial 2
chr	start	end	length	pileup	-LOG10(pvalue)	fold_enrichment	-LOG10(qvalue)	name
chr4	1506180	1507524	1345	198.3	16.2157	1.86373	13.3058	.//_peak_958
chr17	501870	502928	1059	287.36	23.6857	1.82348	20.7902	.//_peak_548
chr1	1737642	1738359	718	199.66	15.4016	1.81433	12.5587	.//_peak_53
chr4	269772	270262	491	347.68	23.293	1.73201	22.091	.//_peak_2008
chr6	1023009	1023882	874	476.3	33.1516	1.73199	31.872	.//_peak_2552
chr1	1306004	1310716	4713	396.33	29.2217	1.73174	27.9885	.//_peak_139
chr6	957693	960231	2539	324.05	30.3569	1.73168	29.1805	.//_peak_2541
chr5	1492294	1493879	1586	546.04	33.2678	1.73151	31.9891	.//_peak_2405
chr12	1001844	1002358	515	419.7	29.8959	1.73069	28.6493	.//_peak_619
chr17	349460	350011	552	683.64	50.2377	1.73061	48.856	.//_peak_1163
chr3	1556355	1558032	1678	394.79	30.8769	1.73001	29.6413	.//_peak_1933
chr5	346162	348304	2143	462.05	34.4839	1.72936	33.2067	.//_peak_2242
chr1	1583501	1588953	5453	360.78	28.1377	1.72913	26.9246	.//_peak_171
chr18	316167	316580	414	404.18	27.0178	1.72898	25.7829	.//_peak_1235
chr5	810723	812807	2085	395.89	29.1371	1.72885	27.9055	.//_peak_2309
chr13	150538	152636	2099	325.91	22.142	1.72869	20.9552	.//_peak_652
chr19	136116	137880	1765	287.38	22.1846	1.72843	21.0271	.//_peak_1275
chr4	1595345	1597338	1994	446.73	33.5676	1.72838	32.3062	.//_peak_2203
chr10	802158	802591	434	390.02	26.4737	1.72771	25.2455	.//_peak_304
chr5	154897	155151	255	183.76	12.3298	1.72709	9.6577	.//_peak_975
chr3	447266	447646	381	344.8	22.4566	1.7269	21.2613	.//_peak_1804
chr1	1566241	1568834	2594	423.91	29.1368	1.72685	27.8964	.//_peak_168
chr7	174733	175162	430	530.84	34.3625	1.72659	33.0583	.//_peak_2639
chr22	151180	152736	1557	451.1	32.0271	1.72641	30.7621	.//_peak_1631
chr4	1429792	1430098	307	349.61	22.5199	1.72637	21.3211	.//_peak_2178
chr1	689867	691432	1566	335.14	23.218	1.72626	22.0278	.//_peak_54
chr9	904495	905000	506	547.74	34.5194	1.7261	33.2061	.//_peak_2993
chr4	1096477	1099902	3426	373.62	29.6151	1.72578	28.3935	.//_peak_2129
chr13	584027	587243	3217	377.13	26.8186	1.72577	25.5993	.//_peak_712
chr13	231213	235604	4392	300.28	21.8363	1.72535	20.6763	.//_peak_666
chr7	409420	410389	970	412.95	29.0694	1.72525	27.832	.//_peak_2675
chr6	79849	80212	364	439.21	29.1614	1.72519	27.9063	.//_peak_2418
chr8	712673	714136	1464	519.03	32.9951	1.72497	31.7004	.//_peak_2841
chr17	397505	400413	2909	430.63	39.863	1.72465	38.6068	.//_peak_1168
chr7	293327	295933	2607	376.14	25.3519	1.7246	24.1429	.//_peak_2658
chr4	551014	553442	2429	371.64	29.1951	1.72375	27.9796	.//_peak_2051
chr8	113954	114283	330	371.33	23.567	1.72375	22.3552	.//_peak_2782
chr7	801268	803448	2181	390.21	26.8409	1.72368	25.6134	.//_peak_2730
chr3	93653	94010	358	311.5	19.9115	1.72307	18.7411	.//_peak_1760
chr10	830808	831812	1005	410.21	26.453	1.7229	25.2195	.//_peak_308
chr26	38306	40853	2548	767.36	54.456	1.72289	53.0312	.//_peak_1727
chr14	467297	469181	1885	379.01	24.7937	1.72287	23.5808	.//_peak_835
chr7	657279	657711	433	404.89	26.9656	1.72274	25.7331	.//_peak_2711
chr14	511596	513979	2384	560.54	46.3436	1.72266	45.0104	.//_peak_844
chr36	6703	7014	312	286.39	18.4428	1.72249	17.2882	.//_peak_1964
chr22	28733	29720	988	306.94	22.4863	1.72242	21.3256	.//_peak_1627
chr11	833110	833688	579	549.28	34.1819	1.72223	32.8732	.//_peak_473
chr15	260191	261349	1159	584.23	42.6583	1.72215	41.3203	.//_peak_948
chr1	736991	738337	1347	302.66	19.1154	1.72171	17.9514	.//_peak_60
chr2	1320362	1321100	739	365.64	26.0889	1.72166	24.8749	.//_peak_1484
chr14	201248	201681	434	488.97	33.0749	1.7209	31.7929	.//_peak_807
chr10	614132	614994	863	399.92	26.696	1.72051	25.4989	.//_peak_273
chr20	458496	458915	420	694.77	44.5288	1.72034	43.1445	.//_peak_1574
chr25	107962	108770	809	629.96	36.7044	1.71935	35.3845	.//_peak_1718
chr19	151151	151464	314	285.83	18.5749	1.71917	17.4219	.//_peak_1277
chr15	695431	696353	923	561.43	38.7159	1.71857	37.3986	.//_peak_1002
chr3	1337380	1338328	949	448.37	28.2044	1.71817	26.9522	.//_peak_1910
chr11	757572	760639	3068	513.42	36.6775	1.71775	35.3818	.//_peak_462
chr6	930678	933472	2795	317.41	31.0718	1.71744	29.9072	.//_peak_2537
chr3	105674	111178	5505	388.09	25.963	1.71706	24.7474	.//_peak_1761
chr17	316816	317284	469	377.36	25.2722	1.71701	24.0574	.//_peak_1158
chr26	26057	28583	2527	779.45	53.9636	1.71674	52.5376	.//_peak_1724
chr13	826454	827754	1301	400.42	25.4031	1.71648	24.1766	.//_peak_743
chr1	117182	117597	416	285.4	18.4895	1.71642	17.3377	.//_peak_9
chr2	1002406	1002926	521	389.57	24.6861	1.71626	23.47	.//_peak_1435
chr9	914817	919979	5163	509.2	34.5344	1.7155	33.2451	.//_peak_2995
chr6	913909	915851	1943	397.13	28.6416	1.71528	27.4125	.//_peak_2535
chr5	1213702	1214041	340	328.64	21.4125	1.71522	20.2309	.//_peak_2366
chr15	747669	752243	4575	527.67	42.7537	1.71468	41.4652	.//_peak_1010
chr1	987467	990689	3223	608.13	38.4054	1.71448	37.0695	.//_peak_97
chr13	493632	494748	1117	292.17	18.4233	1.71424	17.2675	.//_peak_699
chr6	806500	813531	7032	342.55	24.457	1.71399	23.2679	.//_peak_2522
chr13	1069194	1069512	319	337.26	21.0492	1.71387	19.8635	.//_peak_781
chr5	1378827	1384443	5617	461.88	30.0976	1.71384	28.8628	.//_peak_2390
chr3	290002	290371	370	301.17	19.2309	1.7138	18.0686	.//_peak_1787
chr9	1071451	1074342	2892	325.86	29.1214	1.71363	27.9322	.//_peak_3018
chr1	100912	101311	400	284.86	18.7505	1.71336	17.6002	.//_peak_8
chr1	903096	903992	897	649.9	45.523	1.71287	44.1859	.//_peak_85
chr2	1539708	1540082	375	382.05	24.913	1.7126	23.6962	.//_peak_1508
chr10	1189118	1190082	965	351.23	23.6366	1.71258	22.4428	.//_peak_355
chr1	1290973	1294800	3828	422.38	27.7368	1.71256	26.499	.//_peak_135
chr13	799993	801216	1224	331.58	24.2232	1.71227	23.0407	.//_peak_738
chr1	838890	840889	2000	384.99	28.5104	1.71214	27.2883	.//_peak_74
chr11	134890	135519	630	443.5	30.3701	1.71132	29.1166	.//_peak_374
chr10	24081	26207	2127	353.51	23.8511	1.71131	22.6639	.//_peak_197
chr6	826669	828727	2059	365.2	27.2858	1.71129	26.0764	.//_peak_2525
chr10	339322	340594	1273	380.99	25.6626	1.71121	24.4475	.//_peak_238
chr9	385377	385774	398	387.66	25.9467	1.71115	24.7274	.//_peak_2923
chr14	500384	500871	488	445.8	28.251	1.71113	27.0005	.//_peak_841
chr9	751024	751513	490	303.91	18.7511	1.71113	17.5886	.//_peak_2971
chr21	470924	471874	951	287.92	20.614	1.71112	19.4613	.//_peak_1624
chr25	126410	126733	324	516.78	31.7732	1.71101	30.4849	.//_peak_1720
chr10	145285	147218	1934	408.49	27.8662	1.71059	26.6366	.//_peak_211
chr5	1207113	1207420	308	402.44	24.4762	1.71057	23.2544	.//_peak_2365
chr4	1286976	1289023	2048	358.48	24.6157	1.71025	23.4228	.//_peak_2160
chr26	50577	53137	2561	773.28	53.3654	1.70995	51.946	.//_peak_1730
chr7	517769	518451	683	529.49	31.6877	1.70946	30.3963	.//_peak_2692
chr9	1095938	1096453	516	488.65	32.5424	1.70929	31.2672	.//_peak_3020
chr2	777351	777873	523	338.99	21.5781	1.70859	20.3948	.//_peak_1404
chr26	46511	49033	2523	780.04	52.6691	1.70803	51.2495	.//_peak_1729
chr1	1665763	1666093	331	568.95	34.9874	1.7078	33.6732	.//_peak_178
chr7	209685	210730	1046	740.32	63.9464	1.70766	62.5248	.//_peak_2645
chr13	499083	499653	571	348.96	25.8419	1.70756	24.6496	.//_peak_700
chr8	558212	558830	619	573.1	35.3718	1.7075	34.0577	.//_peak_2821
chr9	983483	984917	1435	438.98	31.8536	1.70707	30.6026	.//_peak_3009
chr4	1228865	1229270	406	382.18	25.0632	1.70705	23.851	.//_peak_2149
chr4	196258	197872	1615	384.21	27.767	1.70664	26.5604	.//_peak_1997
chr10	761887	763177	1291	414.38	28.0322	1.70646	26.8124	.//_peak_297
chr24	270223	274119	3897	283.71	18.2497	1.70641	17.1031	.//_peak_1709
chr10	1108856	1109458	603	332.57	20.3216	1.70619	19.1438	.//_peak_343
chr18	567499	569809	2311	351.25	26.4373	1.70595	25.2409	.//_peak_1258
chr3	1387521	1387994	474	373.78	23.6726	1.70501	22.4675	.//_peak_1917
chr11	550155	553504	3350	506.55	33.3035	1.70477	32.0206	.//_peak_437
chr6	1087706	1089146	1441	395.24	27.5368	1.70461	26.3146	.//_peak_2562
chr11	476973	479357	2385	535.16	43.3427	1.7043	42.0303	.//_peak_429
chr10	1115978	1116344	367	431.83	27.1879	1.70379	25.9472	.//_peak_345
chr17	215188	219515	4328	535.98	41.7096	1.70337	40.4246	.//_peak_1144
chr6	1306027	1306780	754	330.52	24.8355	1.70334	23.6542	.//_peak_2586
chr16	243594	247088	3495	438.31	30.4694	1.70217	29.2227	.//_peak_1052
chr9	1211653	1212406	754	618.32	37.4812	1.70171	36.1476	.//_peak_3036
chr2	774829	775978	1150	546.52	32.652	1.70122	31.3552	.//_peak_1403
chr21	236549	236860	312	181.59	11.4576	1.70064	8.8059	.//_peak_699
chr10	370911	371442	532	361.02	22.0099	1.70057	20.8156	.//_peak_243
chr7	230434	231131	698	488.85	31.4243	1.70051	30.1551	.//_peak_2648
chr5	1346298	1350480	4183	375.71	26.9414	1.70005	25.7355	.//_peak_2384
chr17	551627	552621	995	343.56	23.4435	1.70003	22.2566	.//_peak_1180
chr5	1033446	1033935	490	331.25	21.3603	1.69872	20.1841	.//_peak_2346
chr1	1347602	1350326	2725	376.78	28.1316	1.69846	26.9285	.//_peak_145
chr5	526304	526801	498	378.18	25.7359	1.69838	24.5292	.//_peak_2265
chr5	727423	728725	1303	375.11	25.0651	1.69829	23.8595	.//_peak_2295
chr7	767456	769289	1834	484.9	40.89	1.69804	39.6181	.//_peak_2726
chr9	576314	576857	544	369.76	26.2343	1.69795	25.0314	.//_peak_2948
chr1	568903	569438	536	294.09	19.805	1.6979	18.654	.//_peak_41
chr16	589622	591686	2065	349.73	23.6093	1.69694	22.4357	.//_peak_1090
chr9	1209823	1210152	330	414.35	25.5148	1.6967	24.2901	.//_peak_3035
chr15	266509	267153	645	442.09	27.3039	1.69658	26.0656	.//_peak_949
chr17	22099	25999	3901	496.28	37.0472	1.69654	35.7849	.//_peak_1120
chr13	736062	736712	651	409.46	27.3229	1.69624	26.0985	.//_peak_729
chr1	1327239	1327561	323	299.18	18.1199	1.69616	16.9666	.//_peak_141
chr2	125495	127839	2345	391.28	25.4566	1.69611	24.2431	.//_peak_1318
chr3	806258	807999	1742	433.81	32.4988	1.6961	31.2538	.//_peak_1840
chr4	803890	805413	1524	348.07	23.2818	1.69571	22.0972	.//_peak_2083
chr10	407368	407896	529	354.76	22.4146	1.69532	21.2233	.//_peak_248
chr1	1359841	1363662	3822	445.9	27.1068	1.6953	25.8659	.//_peak_147
chr17	203507	203831	325	421.32	25.2259	1.69508	23.9975	.//_peak_1143
chr5	393042	398012	4971	401.27	26.8516	1.69507	25.6558	.//_peak_2249
chr19	432877	433272	396	281.81	18.0671	1.69503	16.9259	.//_peak_1299
chr24	150119	151552	1434	305.75	18.664	1.69499	17.5068	.//_peak_1695
chr5	476576	479603	3028	366.54	23.3405	1.69489	22.1426	.//_peak_2262
chr14	354369	356693	2325	618.33	35.7152	1.69482	34.3939	.//_peak_828
chr7	1230799	1231149	351	310.89	18.9394	1.69463	17.7784	.//_peak_2768
chr5	452931	453536	606	432.62	26.2573	1.6945	25.0223	.//_peak_2258
chr13	25646	27155	1510	282.67	19.3027	1.69446	18.161	.//_peak_639
chr9	174623	175354	732	473.15	28.2921	1.69441	27.0357	.//_peak_2890
chr16	58598	58963	366	349.63	21.62	1.69397	20.4356	.//_peak_1035
chr4	1210034	1211409	1376	467.27	28.5508	1.69387	27.3114	.//_peak_2144
chr5	926392	927991	1600	342.41	24.0647	1.69382	22.8786	.//_peak_2328
chr5	680329	681814	1486	351.06	22.4837	1.69381	21.2957	.//_peak_2288
chr9	859212	861334	2123	455.71	31.2829	1.69331	30.0275	.//_peak_2985
chr11	83802	86733	2932	445.36	32.1999	1.6933	30.9568	.//_peak_365
chr6	1058521	1059285	765	305.9	21.1044	1.69319	19.9475	.//_peak_2557
chr6	398444	399036	593	434.21	30.1098	1.69305	28.8698	.//_peak_2454
chr7	888819	889272	454	328.37	19.9963	1.6929	18.825	.//_peak_2744
chr1	973118	974240	1123	405.55	25.3625	1.69268	24.144	.//_peak_95
chr8	18934	24830	5897	373.62	23.9979	1.69267	22.7971	.//_peak_2778
chr5	636755	637103	349	338.62	20.8423	1.69234	19.663	.//_peak_2280
chr6	861150	867164	6015	356.14	22.3759	1.6922	21.1888	.//_peak_2530
chr2	225165	227161	1997	362	23.9721	1.69218	22.7771	.//_peak_1330
chr6	1400005	1400315	311	418.48	24.6888	1.69216	23.4645	.//_peak_2597
chr23	184673	185890	1218	485.11	39.7739	1.6921	38.4968	.//_peak_1674
chr2	884651	886050	1400	317.19	18.991	1.69185	17.8282	.//_peak_1422
chr12	966587	968687	2101	286.56	18.8281	1.69184	17.6842	.//_peak_616
chr26	30117	32663	2547	763.96	51.0568	1.69171	49.6544	.//_peak_1725
chr14	236667	237348	682	440.65	26.6169	1.69152	25.3805	.//_peak_813
chr15	207047	208430	1384	431.61	27.1708	1.6912	25.9399	.//_peak_941
plasmid	1492	1869	378	28822.6	1727.42	1.69115	1724.08	.//_peak_3047
chr7	164522	165339	818	651.87	41.4753	1.69096	40.1304	.//_peak_2638
chr2	165386	166269	884	309.88	20.1936	1.69075	19.0363	.//_peak_1324
chr13	553522	553850	329	339.31	20.29	1.69069	19.1148	.//_peak_708
chr1	53675	54022	348	280.91	17.3985	1.68967	16.2602	.//_peak_4
chr15	331742	333488	1747	530.7	31.8772	1.68952	30.5946	.//_peak_962
chr7	612975	613782	808	583.97	33.4018	1.68869	32.0971	.//_peak_2705
chr7	1221485	1221969	485	375.24	22.6587	1.68867	21.4583	.//_peak_2767
chr2	234102	234587	486	369.07	22.7526	1.68806	21.5567	.//_peak_1331
chr5	1482634	1483635	1002	621.47	36.6896	1.68805	35.3778	.//_peak_2402
chr29	40298	40622	325	280.59	16.937	1.68772	15.7997	.//_peak_1745
chr2	817899	818675	777	561.48	32.8493	1.68753	31.553	.//_peak_1410
chr13	294033	294362	330	298.61	18.3928	1.68715	17.2451	.//_peak_671
chr1	921122	922218	1097	431.49	26.8587	1.68677	25.6294	.//_peak_87
chr5	43564	47656	4093	340.01	21.9219	1.68666	20.747	.//_peak_2206
chr4	138128	142122	3995	357.19	26.2889	1.68657	25.1102	.//_peak_1987
chr4	356068	357305	1238	344.95	22.1943	1.68628	21.0147	.//_peak_2019
chr6	194146	194480	335	327.17	20.1674	1.68578	18.9992	.//_peak_2431
chr2	1117235	1119121	1887	706.47	44.8908	1.68465	43.5349	.//_peak_1453
chr10	426225	426727	503	448.57	27.2194	1.68437	25.9901	.//_peak_251
chr4	1583276	1583666	391	334.85	20.927	1.68427	19.7534	.//_peak_2202
chr14	500455	500858	404	179.06	11.2031	1.6838	8.60944	.//_peak_299
chr4	1553452	1553819	368	325.79	19.7289	1.68377	18.5623	.//_peak_2195
chr10	242745	243671	927	437.2	29.4349	1.68373	28.1996	.//_peak_225
chr2	1201929	1203040	1112	320.99	23.6976	1.68362	22.5326	.//_peak_1468
chr3	44733	45136	404	569.56	34.2	1.68346	32.902	.//_peak_1751
chr12	478047	485390	7344	310.73	20.3737	1.68331	19.2165	.//_peak_563
chr3	1209284	1214240	4957	378.14	22.6942	1.68303	21.4984	.//_peak_1889
chr1	1387167	1390887	3721	410.4	30.242	1.68275	29.0218	.//_peak_151
chr14	835286	837480	2195	575.13	39.3218	1.68259	38.0144	.//_peak_887
chr8	12426	16520	4095	335.09	21.3356	1.68241	20.1633	.//_peak_2777
chr5	1010179	1013216	3038	301.81	19.0712	1.68238	17.924	.//_peak_2342
chr7	731649	732238	590	481.8	29.298	1.68219	28.0391	.//_peak_2719
chr10	69978	70931	954	413.5	25.9365	1.68208	24.7161	.//_peak_202
chr4	515539	516400	862	363.63	25.0233	1.68198	23.8332	.//_peak_2042
chr8	183771	185949	2179	291.88	18.1357	1.68166	16.9929	.//_peak_2786
chr4	793027	795458	2432	471.2	30.8752	1.68157	29.6221	.//_peak_2082
chr5	555869	556187	319	305.75	18.7834	1.68148	17.6316	.//_peak_2268
chr10	751146	753574	2429	449.2	26.6695	1.68146	25.4454	.//_peak_295
chr2	1444283	1444610	328	338.53	20.2734	1.6812	19.1007	.//_peak_1497
chr20	432455	435437	2983	403.62	23.2349	1.681	22.0282	.//_peak_1573
chr13	289164	291478	2315	303.46	18.2702	1.68091	17.1278	.//_peak_670
chr5	307496	307810	315	375	22.1566	1.68051	20.9622	.//_peak_2238
chr12	597732	599827	2096	288.51	18.4768	1.68048	17.3364	.//_peak_583
chr15	687449	687798	350	462.14	28.5149	1.68013	27.2695	.//_peak_1000
chr2	525652	526973	1322	448.47	28.6221	1.67986	27.3858	.//_peak_1373
chr7	495325	496719	1395	279.27	17.1963	1.67981	16.0625	.//_peak_2687
chr10	1171198	1172080	883	424.86	24.121	1.6794	22.8994	.//_peak_352
chr11	1031373	1034707	3335	372.32	25.435	1.67938	24.2394	.//_peak_496
chr12	1149435	1151129	1695	377.54	24.47	1.6787	23.2679	.//_peak_635
chr16	191026	191676	651	311.17	18.3738	1.67855	17.2194	.//_peak_1046
chr4	1086668	1087910	1243	336.01	23.7407	1.67841	22.5687	.//_peak_2127
chr10	886749	888963	2215	327.48	19.8608	1.67773	18.6969	.//_peak_316
chr4	454093	454988	896	365.87	23.1986	1.67758	22.0097	.//_peak_2034
chr4	382650	385253	2604	362.75	23.004	1.67752	21.8176	.//_peak_2023
chr18	88832	91258	2427	447.09	25.5996	1.6775	24.3749	.//_peak_1207
chr26	54700	57219	2520	771.8	48.3133	1.67687	46.9196	.//_peak_1731
chr20	154849	155159	311	420.14	24.2961	1.67675	23.077	.//_peak_1538
chr23	329483	333168	3686	354.86	26.0688	1.67642	24.881	.//_peak_1690
chr2	1089285	1091651	2367	408.23	25.0672	1.67626	23.8582	.//_peak_1447
chr5	1499468	1501344	1877	278.66	18.5292	1.67615	17.3971	.//_peak_2406
chr6	1487919	1488255	337	660.39	38.5732	1.67591	37.234	.//_peak_2615
chr1	1169525	1172952	3428	384.13	23.1799	1.67588	21.9825	.//_peak_119
chr24	243121	244882	1762	278.58	18.8757	1.67567	17.7444	.//_peak_1706
chr18	185485	186600	1116	349.92	21.1945	1.67562	20.0169	.//_peak_1217
chr4	686872	692152	5281	285.56	21.3289	1.67556	20.1951	.//_peak_2067
chr26	18628	24487	5860	705.91	43.1314	1.67553	41.7792	.//_peak_1723
chr4	1502341	1504090	1750	363.83	23.9513	1.67529	22.7668	.//_peak_2190
chr1	1152121	1152575	455	288.92	17.077	1.67495	15.9396	.//_peak_116
chr2	1302008	1307015	5008	430.58	29.4416	1.67468	28.2138	.//_peak_1482
chr13	894428	894767	340	334.4	20.2182	1.67406	19.0497	.//_peak_753
chr6	590394	591047	654	320.09	19.66	1.67389	18.503	.//_peak_2485
chr17	624159	624464	306	283.8	17.1311	1.6729	15.9976	.//_peak_1186
chr9	514755	517816	3062	364.12	21.3641	1.67235	20.1864	.//_peak_2941
chr4	236036	240505	4470	423.49	27.4986	1.67231	26.2939	.//_peak_2004
chr2	286709	287581	873	284.91	18.4137	1.67214	17.2777	.//_peak_1338
chr16	317782	319345	1564	428.27	28.5776	1.67202	27.3536	.//_peak_1063
chr6	151838	152195	358	315.9	18.4729	1.67189	17.3173	.//_peak_2427
chr14	833417	833758	342	639.76	37.1788	1.67183	35.8511	.//_peak_886
chr1	1215531	1215887	357	315.7	18.3853	1.6714	17.233	.//_peak_124
chr3	402495	402994	500	286.82	17.1545	1.67113	16.0185	.//_peak_1800
chr14	134028	139421	5394	416.46	25.9973	1.67084	24.7818	.//_peak_798
chr13	334203	335942	1740	340.06	20.7618	1.67066	19.5909	.//_peak_676
chr1	1191646	1193710	2065	293.14	18.3759	1.67034	17.2382	.//_peak_122
chr5	677835	678865	1031	485.99	28.444	1.67033	27.1949	.//_peak_2287
chr2	685517	685855	339	324.65	19.2618	1.66957	18.1011	.//_peak_1393
chr16	676645	678825	2181	365.49	22.3536	1.66947	21.1698	.//_peak_1100
chr12	952511	953080	570	344.33	21.289	1.66927	20.1154	.//_peak_615
chr13	165881	167994	2114	295.88	18.3115	1.66917	17.1707	.//_peak_655
chr7	139896	140199	304	594.65	33.6164	1.66882	32.3133	.//_peak_2633
chr14	1024114	1024418	305	405.35	22.6732	1.66859	21.4699	.//_peak_914
chr1	1731139	1733057	1919	709.93	43.4319	1.66856	42.0791	.//_peak_185
chr3	246304	247886	1583	370.43	22.1996	1.66789	21.0145	.//_peak_1780
chr10	754956	755665	710	393.44	23.3997	1.66775	22.1982	.//_peak_296
chr4	359490	359808	319	369.98	21.4964	1.66764	20.31	.//_peak_2020
chr8	476898	478679	1782	428.27	24.3741	1.66738	23.1873	.//_peak_2813
chr7	1071375	1074634	3260	404.02	25.3151	1.66736	24.1076	.//_peak_2754
chr14	813049	813382	334	461.12	26.2783	1.6673	25.0418	.//_peak_884
chr26	34210	36757	2548	756.09	47.4605	1.66726	46.0797	.//_peak_1726
chr13	405048	405467	420	476.62	27.8578	1.66725	26.6115	.//_peak_687
chr13	172844	173406	563	277.17	15.8489	1.66721	14.7219	.//_peak_656
chr8	362	3485	3124	336.93	20.4929	1.66687	19.3277	.//_peak_2775
chr12	74123	74664	542	312.27	19.0503	1.6668	17.8975	.//_peak_520
chr12	127964	128450	487	417.42	25.148	1.6663	23.9364	.//_peak_526
chr6	495847	498261	2415	430.99	30.0022	1.66628	28.7739	.//_peak_2470
chr6	311617	313469	1853	479.65	27.6597	1.66596	26.4118	.//_peak_2442
chr8	1027803	1028948	1146	500	28.5677	1.66526	27.3271	.//_peak_2867
chr1	1025277	1026945	1669	345.51	23.4619	1.6652	22.2841	.//_peak_102
chr9	894725	896594	1870	198.05	11.5882	1.66507	8.94296	.//_peak_1270
chr6	1380607	1380996	390	377.89	22.5808	1.66471	21.391	.//_peak_2594
chr6	420228	421028	801	372.34	21.346	1.66451	20.1602	.//_peak_2457
chr4	902157	902887	731	311.85	18.4983	1.66443	17.3498	.//_peak_2099
chr15	776997	777872	876	476.95	25.6387	1.66412	24.4022	.//_peak_1012
chr5	312646	315165	2520	325.17	19.2626	1.66407	18.1052	.//_peak_2239
chr8	732199	733186	988	329.92	19.2217	1.66398	18.0631	.//_peak_2844
chr2	504781	508023	3243	388.84	24.7459	1.66368	23.5483	.//_peak_1371
chr10	922746	925976	3231	485.25	27.6718	1.66307	26.4337	.//_peak_321
chr5	213838	214992	1155	372.87	22.3455	1.66297	21.1587	.//_peak_2228
chr14	374462	375750	1289	300.08	17.6152	1.66292	16.4757	.//_peak_829
chr11	812839	814784	1946	425.47	24.8302	1.66269	23.616	.//_peak_469
chr7	132118	132834	717	457.93	26.8735	1.66189	25.642	.//_peak_2632
chr4	190180	190752	573	389.01	23.0301	1.66184	21.8342	.//_peak_1995
chr4	1141132	1142249	1118	584.51	30.8489	1.66158	29.562	.//_peak_2135
chr9	931711	932035	325	359.96	20.4529	1.66157	19.2764	.//_peak_2998
chr6	731419	734112	2694	298.71	18.2086	1.66131	17.0693	.//_peak_2507
chr20	65613	66841	1229	584.2	37.3781	1.66081	36.1045	.//_peak_1525
chr1	1112220	1113626	1407	373.78	23.4677	1.66079	22.2851	.//_peak_113
chr23	103327	104101	775	344.62	21.4281	1.66042	20.2626	.//_peak_1660
chr2	208029	209311	1283	383.35	22.6979	1.66032	21.5067	.//_peak_1329
chr5	216427	218731	2305	563.64	30.9704	1.65996	29.6891	.//_peak_2229
chr13	33330	35087	1758	313.03	20.9627	1.65993	19.8133	.//_peak_640
chr5	1409085	1409635	551	287.94	16.4389	1.65976	15.3071	.//_peak_2394
chr14	343907	345303	1397	479.1	31.4768	1.65849	30.228	.//_peak_826
chr15	89018	90197	1180	594.07	39.4529	1.65841	38.1463	.//_peak_931
chr17	69627	69935	309	523.69	30.017	1.6584	28.7542	.//_peak_1125
chr2	1561004	1561345	342	297.69	17.0092	1.65822	15.8713	.//_peak_1509
chr5	850759	853985	3227	346.55	21.6879	1.65811	20.5204	.//_peak_2317
chr7	851738	855655	3918	416.47	26.2624	1.65808	25.0566	.//_peak_2737
chr3	1280190	1280514	325	414.92	23.4239	1.6577	22.2173	.//_peak_1898
chr3	888003	890000	1998	306.43	17.7868	1.65769	16.6431	.//_peak_1845
chr3	90794	92185	1392	317.26	18.3401	1.65751	17.1903	.//_peak_1759
chr17	615860	616470	611	360.9	21.8464	1.65687	20.677	.//_peak_1185
chr3	1347219	1349173	1955	490.2	30.3116	1.65684	29.0638	.//_peak_1912
chr4	678520	678996	477	407.1	23.6253	1.65683	22.4228	.//_peak_2065
chr9	327629	329045	1417	384.3	21.7474	1.6568	20.5592	.//_peak_2914
chr10	1121441	1127980	6540	316.01	21.1348	1.65667	19.9849	.//_peak_346
chr10	469892	470828	937	396.89	22.2765	1.65664	21.0825	.//_peak_256
chr32	39494	40510	1017	392.48	24.362	1.65634	23.1645	.//_peak_1954
chr10	719697	720014	318	296.61	17.0397	1.65595	15.9047	.//_peak_288
chr2	1263096	1265321	2226	496.37	30.765	1.65586	29.5126	.//_peak_1477
chr13	483080	487742	4663	355.39	20.5172	1.65585	19.3562	.//_peak_696
chr8	146685	148081	1397	404.34	23.1769	1.65569	21.9759	.//_peak_2785
chr4	4646	5216	571	530.41	32.6298	1.65556	31.3605	.//_peak_1970
chr4	296310	297144	835	459.36	24.2363	1.65531	23.0126	.//_peak_2011
chr3	946338	947033	696	437.15	24.0306	1.65489	22.8146	.//_peak_1854
chr12	533882	534246	365	380.65	21.7364	1.65486	20.5497	.//_peak_573
chr17	701969	705721	3753	459.16	28.17	1.65449	26.9396	.//_peak_1189
chr9	345278	346179	902	373.36	22.1578	1.65444	20.9809	.//_peak_2916
chr3	984436	984998	563	177.11	10.0131	1.65413	7.44109	.//_peak_843
chr23	162200	165582	3383	275.88	15.7591	1.65373	14.6378	.//_peak_1670
chr15	553220	553599	380	294.01	17.0018	1.65364	15.8682	.//_peak_988
chr22	411080	415845	4766	524.78	47.8054	1.65339	46.5352	.//_peak_1647
chr3	468991	469326	336	311.04	17.3926	1.65226	16.2501	.//_peak_1806
chr4	127538	128767	1230	524.91	33.7628	1.65167	32.4904	.//_peak_1985
chr4	1012732	1013202	471	288.64	16.1686	1.65165	15.0403	.//_peak_2117
chr9	951248	951868	621	419.76	24.3683	1.65154	23.1614	.//_peak_3001
chr1	662558	664128	1571	338.57	19.9344	1.65147	18.7741	.//_peak_52
chr3	1599102	1602436	3335	359.32	19.7181	1.65147	18.5516	.//_peak_1939
chr13	175445	177029	1585	274.51	15.9552	1.65131	14.8359	.//_peak_657
chr4	944806	945215	410	335.67	19.7434	1.65112	18.5837	.//_peak_2105
chr20	294319	294884	566	742.98	42.106	1.65065	40.7452	.//_peak_1554
chr6	50868	54349	3482	331.98	20.8215	1.65059	19.663	.//_peak_2413
chr11	455623	464959	9337	340.49	21.0658	1.65035	19.9096	.//_peak_427
chr9	847451	847825	375	488.66	27.3293	1.6501	26.0877	.//_peak_2982
chr5	418502	420757	2256	331.18	22.6266	1.6492	21.4648	.//_peak_2252
chr8	5930	10019	4090	330.79	19.7977	1.64709	18.6425	.//_peak_2776
chr23	312943	316880	3938	349.04	25.139	1.6469	23.9664	.//_peak_1688
chr6	62191	62742	552	567.11	34.4327	1.64688	33.1485	.//_peak_2416
chr8	1038829	1040560	1732	595.84	33.1748	1.64685	31.9001	.//_peak_2869
chr23	201279	201722	444	587.27	33.7749	1.64623	32.4839	.//_peak_1676
chr26	58687	61302	2616	750.99	46.9474	1.646	45.5798	.//_peak_1732
chr5	387452	388180	729	285.39	18.6034	1.64563	17.4765	.//_peak_2248
chr29	19961	20265	305	330.13	18.0315	1.64504	16.8794	.//_peak_1742
chr7	217252	220403	3152	491.25	39.0888	1.64431	37.8474	.//_peak_2646
chr3	30897	31709	813	385.22	22.8288	1.64376	21.6461	.//_peak_1748
chr10	325221	325794	574	306.05	17.0952	1.64375	15.9575	.//_peak_235
chr2	876870	878930	2061	496.12	29.2632	1.64373	28.0255	.//_peak_1421
chr9	1026694	1031853	5160	417.33	27.1062	1.64364	25.9144	.//_peak_3013
chr11	653516	654188	673	490.09	28.2503	1.64361	27.0155	.//_peak_449
chr6	755248	762986	7739	343.83	20.973	1.64359	19.8148	.//_peak_2513
chr20	182953	184278	1326	215.95	12.293	1.64341	9.70385	.//_peak_651
chr6	118216	119664	1449	335.73	18.5311	1.64341	17.3764	.//_peak_2425
chr14	313060	313618	559	500.75	27.6992	1.64321	26.4546	.//_peak_822
chr2	472902	477543	4642	393.74	24.3839	1.64296	23.2134	.//_peak_1366
chr3	1148233	1148647	415	422.13	23.4303	1.64278	22.2282	.//_peak_1883
chr17	103595	106340	2746	688.73	39.0624	1.64266	37.7398	.//_peak_1130
chr13	1045773	1049060	3288	366.52	23.407	1.64106	22.2302	.//_peak_778
chr16	296832	297896	1065	358.68	20.5709	1.64103	19.4043	.//_peak_1059
chr16	287256	292384	5129	489.67	28.5357	1.64081	27.2976	.//_peak_1058
chr12	412292	412988	697	276.87	15.567	1.64005	14.4514	.//_peak_556
chr2	541882	544457	2576	352.8	19.3898	1.63998	18.2265	.//_peak_1376
chr15	488920	489584	665	1057.36	58.1386	1.6396	56.672	.//_peak_982
chr4	520370	521807	1438	356.75	19.2317	1.6396	18.0698	.//_peak_2043
chr3	370744	372664	1921	355.21	23.075	1.63957	21.9036	.//_peak_1795
chr11	249589	250592	1004	929.22	48.4406	1.63956	47.0185	.//_peak_391
chr2	938213	939900	1688	344.57	19.6252	1.63936	18.4687	.//_peak_1427
chr15	779249	781460	2212	440.78	29.8124	1.63928	28.595	.//_peak_1013
chr21	295400	296738	1339	174.28	9.97468	1.63916	7.47859	.//_peak_710
chr14	488526	488856	331	174.27	9.75044	1.63896	7.23589	.//_peak_297
chr8	200357	201326	970	304.67	16.7948	1.63874	15.6623	.//_peak_2789
chr7	1218129	1218434	306	349.97	19.7082	1.63855	18.5462	.//_peak_2766
chr14	337828	338253	426	493.66	27.1513	1.63789	25.9139	.//_peak_825
chr10	848566	851132	2567	434.23	23.601	1.63775	22.4018	.//_peak_312
chr12	568623	569246	624	329.56	17.7979	1.63764	16.6505	.//_peak_580
chr6	768505	772087	3583	365.44	21.9769	1.63728	20.8161	.//_peak_2515
chr1	272587	273228	642	272.15	15.3347	1.63713	14.2216	.//_peak_19
chr13	491745	492079	335	273.43	15.2101	1.63698	14.0971	.//_peak_698
chr13	442573	443745	1173	308.85	17.9364	1.63598	16.816	.//_peak_692
chr2	772148	772519	372	309.66	16.8469	1.63555	15.7104	.//_peak_1402
chr14	526774	527140	367	473.62	26.1284	1.63548	24.901	.//_peak_847
chr3	65345	68555	3211	373.26	23.5266	1.63505	22.356	.//_peak_1756
chr20	55819	56777	959	739.87	51.8662	1.63502	50.499	.//_peak_1523
chr2	1641808	1643203	1396	281.43	15.4296	1.63493	14.3115	.//_peak_1518
chr8	863136	867010	3875	415.42	24.2711	1.6347	23.0808	.//_peak_2855
chr19	178092	179287	1196	1024.05	59.1705	1.63462	57.7429	.//_peak_1280
chr14	30539	30849	311	371.92	19.4565	1.63393	18.2899	.//_peak_785
chr17	52570	53753	1184	610.58	31.2748	1.63337	29.9897	.//_peak_1123
chr12	703060	703398	339	271.45	15.0004	1.63296	13.8902	.//_peak_596
chr12	687952	688428	477	274.09	14.9317	1.63278	13.8199	.//_peak_594
chr3	262979	264318	1340	376.15	20.2052	1.63256	19.0381	.//_peak_1784
chr16	633092	633401	310	418.98	22.2626	1.63205	21.0662	.//_peak_1096
chr14	352526	352935	410	420.51	22.753	1.63203	21.5562	.//_peak_827
chr11	390962	393818	2857	391.87	23.9064	1.63187	22.7317	.//_peak_414
chr12	693242	694070	829	465.63	25.7315	1.63182	24.5391	.//_peak_595
chr16	714138	715065	928	311.79	16.5708	1.63174	15.4406	.//_peak_1103
chr23	71123	71830	708	546.63	28.3898	1.63162	27.1325	.//_peak_1657
chr8	1031447	1032600	1154	499.21	27.2779	1.6315	26.0544	.//_peak_2868
chr1	90637	91285	649	327.2	18.2811	1.63146	17.1344	.//_peak_7
chr16	888081	890094	2014	356.18	19.0096	1.63126	17.8519	.//_peak_1116
chr22	461683	463409	1727	639.82	33.9842	1.63079	32.6969	.//_peak_1648
chr6	110324	111251	928	439.15	29.8919	1.63026	28.679	.//_peak_2423
chr2	962420	963746	1327	344.89	19.9145	1.62979	18.7592	.//_peak_1430
chr7	62519	62863	345	327.56	18.2174	1.62942	17.0737	.//_peak_2621
chr4	1054497	1055177	681	414.1	22.0976	1.62868	20.9046	.//_peak_2124
chr23	158830	160493	1664	818.09	50.4935	1.62845	49.1107	.//_peak_1669
chr26	42394	44938	2545	762.41	44.5658	1.62841	43.209	.//_peak_1728
chr15	45688	46106	419	477.19	26.3165	1.62829	25.0901	.//_peak_924
chr3	1074791	1075535	745	324.91	17.882	1.62799	16.7416	.//_peak_1870
chr5	1563163	1564213	1051	316.67	21.4674	1.62797	20.3273	.//_peak_2409
chr6	59683	60379	697	477.72	24.7792	1.62734	23.5584	.//_peak_2415
chr2	101968	105837	3870	365.06	21.4495	1.6272	20.2885	.//_peak_1315
chr2	1508928	1509242	315	270.47	14.2898	1.62706	13.1828	.//_peak_1506
chr12	949612	950983	1372	278.76	16.4362	1.62685	15.326	.//_peak_614
chr5	1126055	1126803	749	350.74	19.5385	1.62683	18.3823	.//_peak_2357
chr18	50995	53045	2051	374.45	20.8057	1.62636	19.6408	.//_peak_1204
chr11	816677	821847	5171	637.59	34.504	1.62635	33.2122	.//_peak_470
chr6	594072	595536	1465	280.83	15.4472	1.62632	14.3334	.//_peak_2486
chr6	609190	610092	903	280.92	15.9671	1.62608	14.8534	.//_peak_2489
chr5	1367762	1368007	246	172.85	9.42433	1.6258	6.93757	.//_peak_1005
chr7	723346	725010	1665	340.97	19.072	1.62565	17.9222	.//_peak_2717
chr3	1362814	1366321	3508	611.21	32.7269	1.6256	31.4526	.//_peak_1914
chr14	81428	84667	3240	365.75	19.6238	1.62534	18.4668	.//_peak_791
chr15	14121	14428	308	437.76	22.8749	1.62483	21.673	.//_peak_918
chr4	351659	352633	975	366.77	19.9824	1.62449	18.8161	.//_peak_2018
chr4	53632	59293	5662	359.2	18.9353	1.62435	17.7791	.//_peak_1976
chr1	81497	83001	1505	269.99	16.2431	1.62421	15.1372	.//_peak_6
chr10	879460	881041	1582	543.95	27.8124	1.62397	26.5764	.//_peak_314
chr3	1594414	1597816	3403	405.49	23.2694	1.62393	22.0863	.//_peak_1938
chr5	557652	558941	1290	381.97	23.3365	1.62349	22.1641	.//_peak_2269
chr14	475168	479881	4714	534.15	31.4096	1.62327	30.1594	.//_peak_837
chr21	376770	378986	2217	543.53	30.2336	1.62327	28.9823	.//_peak_1615
chr7	970522	971465	944	335.46	17.7239	1.62315	16.5889	.//_peak_2747
chr11	862434	863572	1139	465.87	24.6674	1.62276	23.4534	.//_peak_476
chr14	230193	230554	362	414.05	21.8165	1.62254	20.6269	.//_peak_812
chr11	537633	539242	1610	606.62	33.3028	1.6218	32.0172	.//_peak_436
chr17	236107	237747	1641	616.3	33.8362	1.62156	32.5498	.//_peak_1146
chr12	904744	912021	7278	361.73	21.4145	1.62118	20.2537	.//_peak_611
chr6	636344	636807	464	399.9	20.8707	1.62101	19.6895	.//_peak_2495
chr4	349542	350081	540	434.94	22.6265	1.62068	21.4265	.//_peak_2017
chr8	802481	808006	5526	619.85	32.9324	1.62039	31.6537	.//_peak_2850
chr12	1137735	1139414	1680	390.27	22.2665	1.62033	21.0852	.//_peak_634
chr2	484495	485511	1017	356.82	18.6239	1.62008	17.4725	.//_peak_1368
chr11	73859	76161	2303	572.45	31.7473	1.62007	30.4819	.//_peak_364
chr10	997521	998633	1113	370.38	21.1014	1.6197	19.9404	.//_peak_330
chr6	713933	716170	2238	409.88	21.0063	1.61957	19.8238	.//_peak_2504
chr21	158754	159130	377	484.49	25.6256	1.61955	24.401	.//_peak_1592
chr17	746581	747562	982	358.59	20.3466	1.61915	19.1895	.//_peak_1193
chr7	86888	87929	1042	718.67	39.3379	1.61891	38.0096	.//_peak_2626
chr19	259850	261295	1446	181.8	10.509	1.61845	8.14684	.//_peak_586
chr12	539106	539579	474	315.4	18.3378	1.61815	17.2057	.//_peak_574
chr2	1661679	1662411	733	272.81	15.6961	1.61785	14.5906	.//_peak_1521
chr23	345488	349418	3931	339.07	22.6776	1.61774	21.5246	.//_peak_1692
chr13	79103	83907	4805	331.25	19.9929	1.61742	18.8503	.//_peak_644
chr14	864381	864696	316	410.85	21.165	1.61722	19.9812	.//_peak_892
chr5	1036837	1038772	1936	423.98	21.4838	1.61694	20.2982	.//_peak_2347
chr4	1216363	1216710	348	378.24	19.4985	1.61688	18.3337	.//_peak_2145
chr31	39662	39973	312	340.96	17.7173	1.61661	16.5714	.//_peak_1946
chr11	882886	883892	1007	610.42	30.175	1.61596	28.8975	.//_peak_478
chr10	773552	775047	1496	364.57	17.6654	1.61595	16.5219	.//_peak_298
chr7	531614	532046	433	500.77	26.9092	1.61575	25.6795	.//_peak_2695
chr18	592959	593531	573	368.57	18.7271	1.61569	17.5673	.//_peak_1262
chr1	1507803	1509968	2166	336.82	18.0615	1.61549	16.9204	.//_peak_161
chr2	965402	965909	508	309.41	16.6946	1.61503	15.5663	.//_peak_1431
chr13	858574	858900	327	338.47	17.3495	1.61494	16.2057	.//_peak_750
chr5	1015437	1015748	312	355.04	18.2756	1.61469	17.1231	.//_peak_2343
chr9	590056	590386	331	268.45	13.967	1.61464	12.8659	.//_peak_2950
chr14	631490	633394	1905	685.79	39.0479	1.61462	37.7475	.//_peak_861
chr3	1496262	1496573	312	347.67	18.1084	1.6144	16.9608	.//_peak_1927
chr2	1159397	1161279	1883	308.19	17.1587	1.61437	16.0335	.//_peak_1460
chr18	339157	342636	3480	286.53	15.9269	1.61408	14.8136	.//_peak_1236
chr2	1368884	1369221	338	279.31	14.4418	1.61402	13.3341	.//_peak_1489
chr5	356850	357277	428	343.68	17.9119	1.61364	16.7651	.//_peak_2244
chr11	618908	621285	2378	501.56	28.9043	1.61356	27.6778	.//_peak_444
chr16	415310	417677	2368	387.64	20.8763	1.61338	19.707	.//_peak_1073
chr11	142141	142495	355	341.78	17.5188	1.61304	16.3744	.//_peak_375
chr5	666709	667323	615	313.46	16.3809	1.61301	15.2514	.//_peak_2286
chr13	213205	215033	1829	404.51	25.7726	1.61246	24.5853	.//_peak_662
chr5	1360036	1360406	371	481.82	25.1711	1.61242	23.9524	.//_peak_2386
chr9	1058563	1063263	4701	322.13	23.4062	1.61242	22.2622	.//_peak_3017
chr21	280345	280675	331	409.76	20.6852	1.61224	19.5083	.//_peak_1601
chr11	1077153	1077710	558	281.71	14.0479	1.6119	12.9402	.//_peak_501
chr4	74628	75209	582	516.9	28.7567	1.61183	27.5204	.//_peak_1978
chr5	650896	655594	4699	373.73	20.8451	1.61175	19.6844	.//_peak_2284
chr7	485621	488051	2431	557.5	28.4421	1.61159	27.1922	.//_peak_2686
chr9	534479	534927	449	365.33	18.6418	1.61145	17.4872	.//_peak_2944
chr16	266163	270136	3974	453.93	24.0144	1.61138	22.813	.//_peak_1054
chr2	433074	434745	1672	403.71	24.8335	1.6105	23.6482	.//_peak_1361
chr11	17474	18472	999	426.01	24.4108	1.61009	23.2186	.//_peak_357
chr11	916127	916462	336	281.42	14.7569	1.61005	13.6487	.//_peak_482
chr8	910065	913446	3382	363.07	19.3893	1.60998	18.232	.//_peak_2858
chr9	583276	584473	1198	409.34	26.3131	1.6099	25.1308	.//_peak_2949
chr13	889189	890791	1603	338.29	18.7644	1.60988	17.6214	.//_peak_752
chr12	1052759	1053968	1210	400.34	22.2567	1.60972	21.0838	.//_peak_624
chr11	878853	879453	601	382.62	19.8289	1.60952	18.6645	.//_peak_477
chr9	1220974	1222128	1155	426.52	26.6828	1.6095	25.4888	.//_peak_3037
chr4	860163	863522	3360	352.23	17.6147	1.60926	16.4728	.//_peak_2094
chr4	543320	543634	315	382.84	19.7105	1.60909	18.5448	.//_peak_2049
chr1	734627	735578	952	267.43	13.8736	1.60886	12.7753	.//_peak_59
chr21	102461	103887	1427	434.65	25.9289	1.60872	24.7303	.//_peak_1585
chr9	878283	878856	574	422.66	22.5962	1.6083	21.4085	.//_peak_2989
chr19	69892	70951	1060	271.35	15.2862	1.60797	14.1859	.//_peak_1271
chr4	1444431	1445148	718	454	23.6533	1.60796	22.4509	.//_peak_2181
chr14	770641	772753	2113	295.44	21.4276	1.60785	20.3067	.//_peak_880
chr2	1123889	1125954	2066	326.59	17.546	1.60749	16.4212	.//_peak_1454
chr4	395549	396497	949	293.42	17.0418	1.60691	15.9244	.//_peak_2026
chr13	930198	932920	2723	350.55	20.1377	1.60615	18.9992	.//_peak_760
chr4	1021416	1022450	1035	329.62	16.7188	1.60603	15.5853	.//_peak_2120
chr4	1207863	1208275	413	431.41	22.622	1.60575	21.4306	.//_peak_2143
chr4	1322947	1323734	788	561.61	28.3685	1.60561	27.1329	.//_peak_2164
chr10	66453	66775	323	433.74	21.8014	1.6056	20.6112	.//_peak_201
chr15	103819	105464	1646	536.09	26.3372	1.60557	25.1295	.//_peak_933
chr9	1080605	1083486	2882	471.13	25.1469	1.60533	23.9445	.//_peak_3019
chr1	1709895	1711256	1362	522.05	26.7948	1.6043	25.5634	.//_peak_182
chr8	900913	908471	7559	384.67	31.6348	1.60406	30.4714	.//_peak_2857
chr9	833366	833729	364	514.12	26.3601	1.60368	25.1316	.//_peak_2980
chr6	98002	98883	882	364.89	22.2056	1.60358	21.045	.//_peak_2421
chr13	992562	992893	332	266.53	13.4801	1.60345	12.3846	.//_peak_767
chr11	131741	133541	1801	443.18	28.3626	1.60312	27.1698	.//_peak_373
chr15	121144	125348	4205	178.48	9.26835	1.60308	6.82848	.//_peak_381
chr1	801526	803931	2406	498.25	28.086	1.60301	26.8646	.//_peak_68
chr8	1240812	1242416	1605	276.83	14.5874	1.60273	13.4846	.//_peak_2876
chr17	740594	740906	313	360.73	18.3413	1.60251	17.1906	.//_peak_1192
chr2	513394	518034	4641	410.44	22.4141	1.6024	21.2623	.//_peak_1372
chr3	1429664	1430047	384	312.58	16.3157	1.60223	15.1923	.//_peak_1919
chr16	517202	518263	1062	343	19.2815	1.6016	18.1386	.//_peak_1082
chr9	296673	297080	408	319.03	16.3296	1.60159	15.2033	.//_peak_2908
chr26	178249	178562	314	333.18	16.5278	1.60145	15.3968	.//_peak_1734
chr11	124407	127164	2758	624.19	35.1105	1.60123	33.8831	.//_peak_371
chr4	392342	393515	1174	401.07	20.5508	1.60122	19.3851	.//_peak_2025
chr10	387000	390580	3581	399.15	23.7523	1.60109	22.5743	.//_peak_246
chr11	893680	893989	310	267.16	13.7885	1.60081	12.6936	.//_peak_479
chr9	592593	593012	420	297.68	15.1784	1.60075	14.0655	.//_peak_2951
chr9	622382	624013	1632	347.57	17.7756	1.60041	16.635	.//_peak_2955
chr8	931491	933853	2363	427.33	21.9804	1.59978	20.7947	.//_peak_2861
chr10	616390	617327	938	426.96	21.1794	1.59969	20.0005	.//_peak_274
chr5	1270360	1271501	1142	470.9	26.2209	1.59968	25.0176	.//_peak_2373
chr9	393835	397656	3822	414.17	22.8475	1.59918	21.6713	.//_peak_2924
chr6	656203	656890	688	286.02	15.391	1.59862	14.285	.//_peak_2497
chr2	1448245	1449933	1689	365.29	20.9137	1.59858	19.7655	.//_peak_1498
chr3	1516984	1518756	1773	391.25	19.9581	1.59782	18.7939	.//_peak_1928
chr11	509671	513422	3752	738.65	37.8361	1.59761	36.5227	.//_peak_432
chr2	626974	627749	776	421.4	20.4353	1.5975	19.258	.//_peak_1386
chr6	345477	349572	4096	315.29	17.7505	1.59702	16.6303	.//_peak_2447
chr6	1130562	1131301	740	278.39	13.9437	1.59695	12.844	.//_peak_2568
chr12	521837	522176	340	282.01	14.2646	1.59678	13.1618	.//_peak_570
chr10	344999	347200	2202	330.35	17.7411	1.5966	16.6146	.//_peak_239
chr17	229664	230638	975	552.65	31.2066	1.59654	29.963	.//_peak_1145
chr2	1371412	1374141	2730	418.3	21.712	1.59638	20.5438	.//_peak_1490
chr6	788812	789479	668	265.27	13.6116	1.59594	12.5199	.//_peak_2518
chr4	913660	916563	2904	278.55	15.3722	1.59592	14.2743	.//_peak_2101
chr17	781473	782129	657	449.09	21.9047	1.59562	18.903	.//_peak_557
chr5	986027	987241	1215	330.69	16.592	1.59536	15.4616	.//_peak_2336
chr6	1011136	1012509	1374	375.06	19.1323	1.59527	17.9768	.//_peak_2549
chr2	347273	348200	928	305.61	15.1389	1.59518	14.0235	.//_peak_1348
chr10	215935	218623	2689	415.76	22.6211	1.59509	21.4558	.//_peak_224
chr3	898665	900093	1429	265.13	13.4374	1.59505	12.3456	.//_peak_1846
chr5	1366647	1367982	1336	416.47	20.259	1.59493	19.0887	.//_peak_2388
chr32	32969	33299	331	385.68	19.6203	1.59482	18.4589	.//_peak_1953
chr3	920388	921632	1245	397.99	21.1965	1.59429	20.0293	.//_peak_1850
chr11	859553	860027	475	382.85	18.5678	1.59419	17.4103	.//_peak_475
chr14	592264	594629	2366	451.26	23.0702	1.59402	21.879	.//_peak_854
chr3	134099	135227	1129	402.49	19.2126	1.59345	18.0489	.//_peak_1764
chr15	807334	811990	4657	435.82	22.3136	1.59344	21.1456	.//_peak_1015
chr2	1127935	1128270	336	520.89	24.9866	1.59312	23.7681	.//_peak_1455
chr20	274818	282209	7392	434.53	32.4565	1.59293	31.2583	.//_peak_1552
chr3	1198338	1198783	446	688.23	34.3664	1.59267	33.0678	.//_peak_1888
chr24	159307	159670	364	264.71	13.9001	1.59258	12.8101	.//_peak_1697
chr11	750142	751588	1447	183.73	9.3084	1.5924	6.8524	.//_peak_195
chr19	429105	429428	324	264.63	13.7325	1.59206	12.6426	.//_peak_1298
chr6	1339062	1340033	972	808.25	38.6676	1.59177	37.3568	.//_peak_2589
chr12	890042	890483	442	474.85	24.7698	1.59167	23.5636	.//_peak_609
chr17	16280	18263	1984	312.63	15.577	1.59161	14.4598	.//_peak_1119
chr13	543223	543621	399	295.02	14.6427	1.59146	13.5342	.//_peak_707
chr2	120708	122996	2289	424.88	20.469	1.59145	19.294	.//_peak_1317
chr14	877545	879692	2148	558.57	30.4198	1.59124	29.186	.//_peak_895
chr6	626492	630204	3713	354.16	18.3014	1.59101	17.1689	.//_peak_2493
chr2	1081475	1081871	397	342.9	16.832	1.59099	15.6971	.//_peak_1445
chr1	1734855	1735926	1072	558.59	31.6258	1.59047	30.3874	.//_peak_186
chr17	538625	539304	680	414.96	19.6227	1.59023	18.4576	.//_peak_1177
chr13	125499	128337	2839	264.39	13.711	1.59012	12.6219	.//_peak_648
chr6	332361	332768	408	312.54	16.2072	1.58988	15.0894	.//_peak_2446
chr9	331671	332214	544	315.06	15.1254	1.58982	14.0065	.//_peak_2915
chr5	1146465	1146789	325	381.76	18.726	1.58954	17.5703	.//_peak_2359
chr11	419777	420242	466	361.37	18.0142	1.58932	16.8691	.//_peak_419
chr11	585961	588040	2080	458.04	23.5904	1.58868	22.395	.//_peak_440
chr3	394674	395036	363	391.87	19.0805	1.58867	17.9217	.//_peak_1798
chr7	108399	108884	486	409.57	20.4571	1.58867	19.2862	.//_peak_2628
chr7	1204982	1205334	353	323.98	15.6681	1.58798	14.545	.//_peak_2764
chr12	452098	452409	312	168.8	8.49458	1.58789	6.10603	.//_peak_220
chr10	846729	847139	411	363.46	17.7941	1.58759	16.6498	.//_peak_311
chr9	1048468	1048841	374	366.23	17.6319	1.58757	16.4866	.//_peak_3014
chr10	791747	794778	3032	341.77	17.811	1.58743	16.6809	.//_peak_302
chr14	42112	45052	2941	348.98	16.6128	1.587	15.4874	.//_peak_786
chr23	53724	54385	662	561.86	25.5639	1.587	24.33	.//_peak_1656
chr16	872993	874783	1791	518.5	26.8357	1.58683	25.6082	.//_peak_1113
chr4	1267679	1268934	1256	372.86	17.7876	1.58659	16.6468	.//_peak_2156
chr2	1223380	1223720	341	521.78	24.3327	1.58629	23.1192	.//_peak_1471
chr5	1478817	1479133	317	311.96	15.1697	1.58607	14.0535	.//_peak_2401
chr7	692155	693377	1223	1007.92	55.8021	1.58595	54.4111	.//_peak_2714
chr3	306742	307108	367	266.14	12.7045	1.58574	11.6164	.//_peak_1789
chr7	274857	277520	2664	361.83	19.078	1.58559	17.9435	.//_peak_2654
chr15	721557	722442	886	434.35	21.0558	1.58551	19.878	.//_peak_1006
chr6	681206	684511	3306	353.23	20.4183	1.58544	19.2739	.//_peak_2502
chr20	271247	272188	942	203.57	9.85303	1.58508	7.32056	.//_peak_664
chr9	1201642	1203352	1711	414.37	21.731	1.58506	20.5625	.//_peak_3033
chr8	551729	552341	613	308.31	16.5841	1.58465	15.4723	.//_peak_2819
chr4	1506076	1508076	2001	996.17	46.2819	1.58463	44.8796	.//_peak_2191
chr21	400349	402201	1853	536.39	24.3484	1.58445	23.136	.//_peak_1617
chr11	485419	486061	643	612.64	28.5281	1.58436	27.2677	.//_peak_430
chr14	87485	90259	2775	280.76	13.8132	1.58425	12.7219	.//_peak_792
chr23	143494	144885	1392	191.25	9.37816	1.58358	6.91547	.//_peak_775
chr10	481727	482670	944	215.45	10.5757	1.58349	8.08256	.//_peak_76
chr1	1049122	1050185	1064	272.48	13.2438	1.58329	12.1527	.//_peak_105
chr3	475655	475988	334	403.6	19.798	1.58323	18.635	.//_peak_1807
chr16	95312	96186	875	403.56	18.7375	1.58258	17.5841	.//_peak_1037
chr2	1649648	1656936	7289	267.89	14.1011	1.58251	13.0122	.//_peak_1520
chr14	523992	524355	364	468.08	22.249	1.58224	21.061	.//_peak_846
chr14	171284	174034	2751	287.49	15.1234	1.58212	14.0265	.//_peak_802
chr2	1183427	1185065	1639	372.49	19.2948	1.58198	18.1441	.//_peak_1464
chr7	565741	566612	872	1221.08	61.6974	1.58167	60.2492	.//_peak_2699
chr5	855846	857984	2139	361.85	17.7702	1.5813	16.6355	.//_peak_2318
chr9	59599	60471	873	445.21	21.6064	1.58123	20.422	.//_peak_2880
chr12	562003	563526	1524	317.07	16.4251	1.58097	15.3096	.//_peak_577
chr4	112954	114698	1745	507.05	29.3987	1.58082	28.1889	.//_peak_1983
chr1	626794	629281	2488	405.98	18.8337	1.58075	17.6731	.//_peak_47
chr14	756651	757329	679	611.46	30.6314	1.58072	29.3696	.//_peak_878
chr6	705590	708537	2948	282.81	19.3402	1.58056	18.2369	.//_peak_2503
chr2	1000170	1000690	521	477.97	22.3537	1.58031	21.1565	.//_peak_1434
chr6	719438	719958	521	353.83	17.4991	1.57989	16.3613	.//_peak_2505
chr5	1574984	1576615	1632	542.15	25.1166	1.57953	23.914	.//_peak_2410
chr7	457783	460211	2429	656.73	29.812	1.57951	28.5688	.//_peak_2683
chr8	104374	106344	1971	439.98	21.2804	1.57929	20.1059	.//_peak_2781
chr15	608664	609484	821	263.24	12.4544	1.57859	11.3702	.//_peak_991
chr6	156690	159441	2752	319.12	16.3185	1.57856	15.1997	.//_peak_2428
chr19	166305	166680	376	355.57	17.732	1.5785	16.5942	.//_peak_1278
chr12	399264	400753	1490	332.07	18.5634	1.57838	17.4331	.//_peak_555
chr5	941826	942196	371	353.77	17.7289	1.57837	16.5915	.//_peak_2330
chr16	368508	368882	375	171.47	8.33599	1.57804	5.95833	.//_peak_468
chr13	701358	701962	605	357.1	16.5131	1.57764	15.378	.//_peak_725
chr14	912012	912777	766	387.19	18.5379	1.57735	17.3865	.//_peak_900
chr12	683106	683411	306	321.46	15.2009	1.57721	14.086	.//_peak_593
chr15	308116	308950	835	546.73	26.7794	1.57711	25.5574	.//_peak_957
chr9	453211	453543	333	312.35	15.8726	1.57674	14.7599	.//_peak_2929
chr9	1266109	1269766	3658	527.77	29.3907	1.57651	28.1737	.//_peak_3044
chr5	586323	587277	955	326.87	16.2064	1.5763	15.0865	.//_peak_2272
chr33	6656	17415	10760	328.77	16.5492	1.57616	15.426	.//_peak_1956
chr23	129469	131607	2139	429.75	29.6627	1.5761	28.4666	.//_peak_1664
chr13	803318	803623	306	297.43	14.486	1.57583	13.3836	.//_peak_739
chr5	990792	994862	4071	426.94	22.2369	1.57546	21.0873	.//_peak_2337
chr6	909215	910820	1606	280.24	14.019	1.57541	12.9295	.//_peak_2534
chr7	871638	872383	746	347.94	17.5658	1.57465	16.4338	.//_peak_2740
chr25	20749	24009	3261	261.8	13.6849	1.57464	12.603	.//_peak_1717
chr11	632778	636112	3335	383.19	18.5629	1.57463	17.4199	.//_peak_446
chr33	21557	37696	16140	319.58	16.484	1.57389	15.3665	.//_peak_1957
chr33	40240	49433	9194	328.35	16.3859	1.57353	15.2636	.//_peak_1958
chr2	1628548	1638797	10250	271.62	13.5887	1.57345	12.5012	.//_peak_1517
chr5	343879	344240	362	167.25	8.22612	1.57338	5.88041	.//_peak_980
chr10	1111184	1112241	1058	346.84	18.5349	1.57326	17.3998	.//_peak_344
chr9	316507	318976	2470	328.52	17.6613	1.5729	16.5472	.//_peak_2911
chr11	642961	645006	2046	181.3	9.31858	1.57279	6.9516	.//_peak_181
chr7	605113	605476	364	507.94	23.9675	1.57271	22.7601	.//_peak_2704
chr6	869190	869576	387	359.18	17.0669	1.57241	15.9319	.//_peak_2531
chr1	1714593	1715936	1344	562.92	27.4284	1.57238	26.1982	.//_peak_183
chr4	822621	823896	1276	355.64	16.4321	1.57223	15.3017	.//_peak_2087
chr16	540674	549227	8554	387.58	18.3958	1.57212	17.2525	.//_peak_1084
chr2	1256543	1257290	748	315.15	17.3127	1.57211	16.197	.//_peak_1476
chr4	182748	183089	342	276.42	12.9662	1.57211	11.8774	.//_peak_1993
chr6	1403997	1405561	1565	318.44	15.8784	1.57192	14.7652	.//_peak_2598
chr1	757357	758238	882	361.26	17.0968	1.57187	15.9613	.//_peak_63
chr13	1024666	1025055	390	352.92	17.1192	1.57185	15.9877	.//_peak_773
chr17	771046	771353	308	382.45	18.0147	1.57172	16.8677	.//_peak_1196
chr5	755906	756213	308	341.64	16.1011	1.57162	14.9768	.//_peak_2301
chr2	298008	302585	4578	320.15	17.4657	1.57158	16.3584	.//_peak_1340
chr9	362579	366311	3733	355.21	16.6615	1.57147	15.5299	.//_peak_2918
chr13	1019921	1021004	1084	269.33	12.6428	1.57146	11.5577	.//_peak_772
chr4	464187	466645	2459	359.75	19.3223	1.57146	18.1837	.//_peak_2035
chr23	190608	192590	1983	211.3	10.2071	1.57083	7.76247	.//_peak_783
chr4	720543	720946	404	166.95	8.07523	1.57062	5.73229	.//_peak_922
chr14	166413	168112	1700	489.82	22.6666	1.57052	21.4731	.//_peak_801
chr5	1183135	1183471	337	293.44	13.551	1.57017	12.4529	.//_peak_2363
chr8	291156	293082	1927	171.28	8.44937	1.57012	6.10745	.//_peak_1182
chr5	182718	183115	398	376.92	18.6866	1.56993	17.5421	.//_peak_2224
chr5	427881	429960	2080	354.12	18.3723	1.56991	17.2375	.//_peak_2253
chr18	374231	375595	1365	662.76	35.4786	1.56945	34.2237	.//_peak_1243
chr21	241518	242051	534	166.81	8.19386	1.56927	5.86341	.//_peak_701
chr6	1453567	1456462	2896	394.62	17.8975	1.56924	16.7637	.//_peak_2607
chr15	709414	711187	1774	179.65	8.74267	1.56923	6.35762	.//_peak_440
chr1	1053954	1055653	1700	322.3	16.8666	1.56912	15.7534	.//_peak_106
chr1	954898	955229	332	431.65	20.1735	1.56879	19.0052	.//_peak_93
chr1	1483862	1485276	1415	291.06	15.502	1.56879	14.4046	.//_peak_158
chr4	247171	247629	459	385.29	18.6482	1.56872	17.5	.//_peak_2006
chr1	509206	509595	390	279.07	13.0439	1.56791	11.9552	.//_peak_37
chr9	528401	532846	4446	608.17	28.0925	1.56769	26.8526	.//_peak_2943
chr12	1072055	1075762	3708	598.63	27.1715	1.56754	25.9391	.//_peak_628
chr7	1133853	1134331	479	431.28	20.1721	1.56737	19.0027	.//_peak_2760
chr11	382776	383087	312	399.55	18.38	1.56724	17.2279	.//_peak_412
chr12	51113	53053	1941	405.42	20.3513	1.56698	19.1954	.//_peak_515
chr5	694422	695438	1017	345.89	16.8772	1.56679	15.7503	.//_peak_2291
chr32	1816	5860	4045	457.6	25.6824	1.56678	24.5009	.//_peak_1950
chr6	800058	802879	2822	354.7	16.9662	1.56676	15.8383	.//_peak_2521
chr4	1258771	1259450	680	446.95	19.495	1.56656	18.3245	.//_peak_2154
chr13	971972	973355	1384	399.83	17.017	1.5663	15.8911	.//_peak_765
chr6	394118	394737	620	300.69	14.2899	1.56618	13.1905	.//_peak_2453
plasmid	4078	11659	7582	32076.7	1266.96	1.56555	1263.03	.//_peak_1325
chr13	91498	92670	1173	277.84	14.0122	1.5655	12.9222	.//_peak_645
chr4	1449663	1452320	2658	351.26	18.7031	1.56548	17.5832	.//_peak_2182
chr5	645583	648061	2479	312.98	15.5627	1.56545	14.4569	.//_peak_2283
chr14	488564	490196	1633	446.53	20.653	1.56526	19.4819	.//_peak_839
chr2	739920	743306	3387	407	20.2224	1.56469	19.0887	.//_peak_1399
chr13	1012913	1014318	1406	360.91	19.8932	1.56463	18.7597	.//_peak_771
chr12	1130003	1134893	4891	344.12	17.0671	1.56447	15.954	.//_peak_633
chr5	433198	433580	383	476.27	21.4631	1.56423	20.2847	.//_peak_2254
chr1	1550034	1550411	378	261.84	12.2602	1.56397	11.1831	.//_peak_167
chr1	825169	825578	410	352.73	16.3226	1.56364	15.1945	.//_peak_70
chr10	1139397	1139722	326	284.94	13.1985	1.56227	12.1087	.//_peak_347
chr10	994996	995967	972	417.57	19.844	1.56219	18.7209	.//_peak_329
chr12	566933	567269	337	321.74	15.1241	1.56161	14.0142	.//_peak_579
chr6	673577	673903	327	268.19	12.5536	1.5613	11.4742	.//_peak_2501
chr3	38812	39129	318	166.54	7.82016	1.56129	5.50222	.//_peak_806
chr6	326547	330526	3980	312.66	15.9859	1.56124	14.8808	.//_peak_2445
chr14	394396	395468	1073	460.16	21.7172	1.56087	20.5395	.//_peak_831
chr1	831956	834107	2152	306.03	14.9243	1.56058	13.8222	.//_peak_72
chr24	207386	209212	1827	287.58	13.7429	1.56021	12.6578	.//_peak_1703
chr29	49913	51612	1700	344.34	17.179	1.56017	16.0531	.//_peak_1746
chr27	42696	44265	1570	165.9	7.94991	1.55991	5.63985	.//_peak_801
chr3	186009	188363	2355	361.17	17.2653	1.55932	16.135	.//_peak_1773
chr1	1337264	1338984	1721	303.31	15.8658	1.55916	14.7675	.//_peak_144
chr1	1140789	1141237	449	396.45	18.8032	1.55892	17.653	.//_peak_115
chr14	950847	951227	381	353.97	15.9817	1.55832	14.8572	.//_peak_906
chr11	221489	221832	344	426	19.3744	1.5583	18.2133	.//_peak_384
chr3	936598	937099	502	452.33	19.4868	1.55815	18.3173	.//_peak_1853
chr1	1332439	1333495	1057	266.97	12.4761	1.55809	11.3982	.//_peak_143
chr6	907672	907983	312	294.16	13.5931	1.55779	12.4992	.//_peak_2533
chr9	602346	602765	420	258.9	11.7392	1.55774	10.666	.//_peak_2952
chr3	1608123	1608850	728	321.45	16.2037	1.55752	15.0946	.//_peak_1941
chr1	453683	454609	927	407.04	17.6075	1.55685	16.46	.//_peak_33
chr8	142190	142567	378	351.89	16.7057	1.55667	15.5803	.//_peak_2784
chr14	323624	324324	701	758.87	34.7763	1.55663	33.4926	.//_peak_824
chr2	246765	247232	468	391.06	18.6052	1.55654	17.4622	.//_peak_1333
chr18	233539	234013	475	450.81	20.7187	1.556	19.547	.//_peak_1224
chr4	1500110	1500625	516	299.74	13.4715	1.55566	12.3765	.//_peak_2189
chr1	924759	926340	1582	403.48	19.5365	1.55561	18.3856	.//_peak_88
chr2	1100667	1101719	1053	346.95	16.0113	1.55554	14.8905	.//_peak_1450
chr3	411134	413833	2700	410.45	20.8013	1.55518	19.6581	.//_peak_1801
chr13	478170	480407	2238	416.93	19.5192	1.55507	18.3656	.//_peak_695
chr4	299290	301647	2358	281.72	14.5583	1.55506	13.4739	.//_peak_2012
chr14	399543	400115	573	392.32	20.5369	1.55503	19.3919	.//_peak_832
chr3	211151	212766	1616	363.3	16.4162	1.55477	15.2883	.//_peak_1777
chr15	42456	44427	1972	594.77	26.6018	1.55463	25.371	.//_peak_923
chr19	194511	195239	729	280.8	13.7183	1.55448	12.6335	.//_peak_1282
chr8	333921	335068	1148	336.96	15.9073	1.55415	14.7937	.//_peak_2800
chr10	94193	95103	911	323.54	14.57	1.55401	13.4639	.//_peak_204
chr6	1277543	1278081	539	344.75	14.9526	1.55399	13.8359	.//_peak_2584
chr2	941662	943456	1795	299.38	13.6682	1.55393	12.5772	.//_peak_1428
chr16	598215	598917	703	523.03	21.447	1.55352	20.2538	.//_peak_1092
chr6	238762	239857	1096	298.69	13.6127	1.55302	12.5228	.//_peak_2436
chr4	1239544	1239943	400	341.69	15.8828	1.55282	14.7659	.//_peak_2151
chr14	820028	825651	5624	165.23	7.95748	1.55274	5.68464	.//_peak_336
chr8	1131919	1132904	986	402.3	17.3834	1.55252	16.2608	.//_peak_2873
chr2	1645139	1647602	2464	266.45	12.1963	1.55223	11.1206	.//_peak_1519
chr4	1249569	1250395	827	286.66	14.9613	1.55217	13.8715	.//_peak_2152
chr14	687799	688334	536	444.18	23.5882	1.55213	22.4167	.//_peak_870
chr17	262370	262791	422	559.63	26.1646	1.55175	24.9471	.//_peak_1150
chr20	267367	267707	341	817.25	35.1548	1.55145	33.8402	.//_peak_1550
chr9	41857	43594	1738	414.3	17.6576	1.55113	16.5115	.//_peak_2878
chr5	1155218	1158824	3607	367.25	17.1655	1.55101	16.0407	.//_peak_2361
chr31	7122	7806	685	165.14	7.63024	1.55099	5.34657	.//_peak_885
chr4	554908	557235	2328	399.32	18.5371	1.55084	17.3921	.//_peak_2052
chr1	489541	492909	3369	425.08	19.2475	1.55082	18.0961	.//_peak_35
chr9	688355	691135	2781	373.63	20.3543	1.5507	19.2165	.//_peak_2966
chr14	671809	672197	389	353.6	15.6477	1.55067	14.5263	.//_peak_868
chr11	878536	879442	907	170.62	7.84974	1.55051	5.54179	.//_peak_206
chr2	811754	812574	821	401.23	17.6712	1.5505	16.5348	.//_peak_1409
chr2	899559	902766	3208	410.17	18.351	1.54992	17.2087	.//_peak_1424
chr6	658540	659828	1289	321.06	15.789	1.54948	14.6814	.//_peak_2498
chr22	285302	287869	2568	165.9	8.02303	1.54911	5.75747	.//_peak_738
chr7	69573	70696	1124	344.62	15.417	1.54906	14.3021	.//_peak_2623
chr19	178341	179328	988	186.73	8.39262	1.54898	6.01395	.//_peak_583
chr21	314962	315394	433	516.82	23.8263	1.54879	22.6269	.//_peak_1609
chr3	828109	828593	485	412.69	19.0545	1.54816	17.9049	.//_peak_1841
chr1	1158499	1159773	1275	257.86	11.6363	1.54797	10.5677	.//_peak_117
chr6	410464	416912	6449	359.26	17.3071	1.54762	16.1873	.//_peak_2456
chr2	842378	844183	1806	300.24	17.6181	1.54744	16.5201	.//_peak_1415
chr19	231339	232893	1555	169.48	7.96454	1.54726	5.69797	.//_peak_585
chr2	1152231	1153535	1305	164.42	7.57715	1.54693	5.30187	.//_peak_617
chr4	118901	119251	351	203.71	9.14803	1.5468	6.70227	.//_peak_906
chr23	170645	177855	7211	260.48	11.9893	1.5466	10.9205	.//_peak_1672
chr4	1352277	1355276	3000	383.9	17.8949	1.54644	16.7635	.//_peak_2166
chr15	988715	1002780	14066	321.3	15.1322	1.54615	14.0267	.//_peak_1030
chr37	20843	22416	1574	293.41	13.6001	1.5454	12.5107	.//_peak_1969
chr15	242642	245063	2422	598.81	27.9026	1.54524	26.6762	.//_peak_946
chr1	869733	871572	1840	260.67	12.5751	1.5449	11.5065	.//_peak_79
chr17	172245	172589	345	423.42	18.0507	1.5446	16.9004	.//_peak_1138
chr14	211305	211654	350	166.17	7.49345	1.54426	5.21757	.//_peak_263
chr31	21844	24782	2939	277.74	13.3143	1.54362	12.2384	.//_peak_1944
chr14	46465	46791	327	300.7	13.222	1.54354	12.1323	.//_peak_787
chr16	279749	281847	2099	480.45	22.3301	1.5434	21.1486	.//_peak_1056
chr1	1545883	1548554	2672	422.85	18.2772	1.54337	17.1555	.//_peak_166
chr3	354848	359445	4598	313.96	15.0875	1.54337	13.987	.//_peak_1793
chr1	1423953	1424234	282	164.02	7.46381	1.54321	5.19777	.//_peak_32
chr13	131346	135085	3740	334.1	16.4473	1.54313	15.3362	.//_peak_649
chr13	326290	328763	2474	352.47	16.9471	1.54271	15.8284	.//_peak_675
chr3	1014553	1015679	1127	333.62	14.3022	1.54256	13.1977	.//_peak_1858
chr11	831239	831666	428	495.28	21.8959	1.54235	20.7106	.//_peak_472
chr7	120482	120889	408	214.1	9.20167	1.54214	6.71255	.//_peak_1073
chr1	1636140	1636987	848	189.41	8.45557	1.54196	6.08143	.//_peak_39
chr3	699460	699824	365	306.26	13.4738	1.54167	12.3808	.//_peak_1830
chr19	51638	52571	934	480.01	19.5896	1.54128	18.4249	.//_peak_1268
chr4	713913	714741	829	287.85	12.0592	1.5412	10.977	.//_peak_2069
chr5	1223950	1225318	1369	325.27	14.1724	1.54081	13.0707	.//_peak_2368
chr5	806624	807537	914	289.99	12.6887	1.54078	11.6071	.//_peak_2308
chr4	732194	734258	2065	352.71	16.8089	1.54031	15.6941	.//_peak_2073
chr2	12405	12777	373	255.97	11.0291	1.54012	9.96459	.//_peak_1304
chr15	57088	57402	315	425.03	18.1164	1.5396	16.9667	.//_peak_926
chr14	644058	645360	1303	410.24	19.1589	1.53909	18.0178	.//_peak_863
chr6	1384679	1385728	1050	290.64	12.6634	1.53907	11.5824	.//_peak_2595
chr4	961130	961447	318	493.2	20.6718	1.53901	19.4922	.//_peak_2107
chr5	1055272	1056009	738	171.11	7.70831	1.53892	5.43195	.//_peak_996
chr3	1468224	1470459	2236	449.97	23.3758	1.53875	22.2068	.//_peak_1924
chr6	791249	791845	597	374.66	15.3171	1.53851	14.1927	.//_peak_2519
chr15	521035	524205	3171	386.84	19.8564	1.53797	18.7347	.//_peak_985
chr12	856701	858012	1312	255.59	11.6831	1.5379	10.6198	.//_peak_605
chr1	1100667	1102747	2081	354.82	17.7519	1.53736	16.6332	.//_peak_111
chr3	1464469	1465197	729	356.1	18.7999	1.53724	17.6781	.//_peak_1923
chr17	81243	81548	306	520.63	22.2286	1.53667	21.0391	.//_peak_1127
chr17	73159	74837	1679	514.43	21.0596	1.53581	19.8754	.//_peak_1126
chr10	1023814	1024310	497	342.53	15.5999	1.53513	14.491	.//_peak_334
chr4	1348816	1350654	1839	583.65	24.1111	1.53511	22.9149	.//_peak_2165
chr4	93974	94250	277	275.82	11.5975	1.53494	8.93257	.//_peak_901
chr17	6700	8686	1987	352.11	14.5583	1.5344	13.4474	.//_peak_1118
chr9	300942	302216	1275	257.07	11.6796	1.53396	10.6173	.//_peak_2909
chr12	439207	440127	921	335.51	14.2499	1.5339	13.1473	.//_peak_559
chr3	1326424	1331112	4689	416.91	18.5511	1.53372	17.41	.//_peak_1909
chr15	378153	379918	1766	781.42	37.5046	1.53347	36.2137	.//_peak_972
chr18	295216	295756	541	573.29	22.8082	1.53346	21.6063	.//_peak_1233
chr14	220398	222599	2202	314.59	14.6361	1.53344	13.5506	.//_peak_810
chr6	631856	633472	1617	265.72	11.286	1.53329	10.219	.//_peak_2494
chr9	1163209	1163522	314	471.63	19.9442	1.53325	18.7774	.//_peak_3029
chr23	155535	158266	2732	187.89	8.24754	1.53287	5.91312	.//_peak_776
chr14	1009369	1011901	2533	393.98	18.1372	1.53237	17.0037	.//_peak_912
chr14	1019049	1019925	877	390.82	18.0375	1.53218	16.9051	.//_peak_913
chr15	379524	380170	647	162.82	7.38561	1.53199	5.1539	.//_peak_409
chr9	460818	462767	1950	345.61	15.3465	1.53179	14.2401	.//_peak_2932
chr4	1170711	1173064	2354	414.92	18.0558	1.53165	16.9295	.//_peak_2139
chr9	980845	981154	310	302.33	12.6835	1.53157	11.5977	.//_peak_3008
chr3	389177	390228	1052	285.22	13.9997	1.53153	12.9199	.//_peak_1797
chr14	582532	583416	885	531.26	21.5088	1.53125	20.3222	.//_peak_853
chr2	808901	810364	1464	364.01	16.0163	1.53105	14.8985	.//_peak_1408
chr5	591441	592261	821	355.94	14.8833	1.53075	13.77	.//_peak_2273
chr18	365166	365496	331	341.13	14.3207	1.53069	13.2157	.//_peak_1241
chr6	181784	184187	2404	291.53	13.3835	1.53041	12.3088	.//_peak_2429
chr15	272698	273030	333	454.51	19.9164	1.53035	18.7565	.//_peak_950
chr2	80547	81900	1354	446.56	18.4495	1.53026	17.3002	.//_peak_1311
chr22	212629	213219	591	163.95	7.21692	1.53019	4.9807	.//_peak_732
chr6	966764	970433	3670	376.97	18.5308	1.53014	17.4032	.//_peak_2543
chr6	856877	859690	2814	333.24	14.3645	1.52981	13.2624	.//_peak_2529
chr5	705909	706792	884	332.4	14.3866	1.52935	13.2865	.//_peak_2293
chr7	768148	770945	2798	190.92	8.39666	1.52882	6.08001	.//_peak_1161
chr6	584282	584585	304	336.16	14.0826	1.52836	12.981	.//_peak_2483
chr13	538234	540254	2021	311	13.4522	1.52825	12.3646	.//_peak_706
chr2	1380982	1382299	1318	291.13	13.2924	1.52823	12.2115	.//_peak_1491
chr4	910587	911275	689	340.24	14.483	1.52814	13.3777	.//_peak_2100
chr10	992130	992504	375	253.91	10.9228	1.52781	9.86477	.//_peak_328
chr17	542478	544301	1824	383.22	16.3435	1.52768	15.2189	.//_peak_1179
chr5	901292	902524	1233	162.44	7.30914	1.52747	5.09218	.//_peak_991
chr5	444022	444339	318	263.84	10.9386	1.52729	9.87515	.//_peak_2256
chr15	746078	746395	318	314.78	13.0745	1.5272	11.9849	.//_peak_1009
chr13	788928	789262	335	284.74	12.1997	1.52698	11.1246	.//_peak_736
chr5	1053672	1054584	913	360.17	15.7927	1.5268	14.6832	.//_peak_2349
chr17	759016	760458	1443	279.66	13.2174	1.52631	12.1442	.//_peak_1195
chr22	401438	403192	1755	508.95	23.5948	1.52612	22.4127	.//_peak_1645
chr1	214515	215070	556	162.65	7.45013	1.52607	5.25052	.//_peak_5
chr11	805331	807723	2393	166.12	7.32905	1.526	5.10153	.//_peak_199
chr25	4302	14913	10612	309.32	13.1996	1.52583	12.1173	.//_peak_1716
chr8	809796	813872	4077	498.2	20.7969	1.52562	19.6282	.//_peak_2851
chr9	1250899	1251859	961	792.17	32.3604	1.52559	31.0962	.//_peak_3042
chr2	680206	681669	1464	283.95	11.8912	1.52553	10.8187	.//_peak_1392
chr14	647145	647449	305	257.5	10.9439	1.52551	9.88504	.//_peak_864
chr11	410092	410484	393	165.84	7.14092	1.52543	4.90575	.//_peak_153
chr1	1671940	1675108	3169	602.36	30.1628	1.52526	28.9498	.//_peak_179
chr8	569758	572090	2333	289.94	12.6246	1.52525	11.5491	.//_peak_2824
chr4	1005521	1006033	513	480.54	19.4037	1.52393	18.2374	.//_peak_2115
chr4	316486	320365	3880	440.65	16.4061	1.5236	15.2888	.//_peak_2013
chr11	562865	572102	9238	162.07	7.1617	1.52258	4.96404	.//_peak_174
chr14	152638	152950	313	355.76	14.5595	1.52258	13.4516	.//_peak_799
chr2	783410	784585	1176	285.72	11.9443	1.52251	10.8732	.//_peak_1405
chr4	963455	966566	3112	261.08	12.3462	1.52243	11.2857	.//_peak_2108
chr14	838917	839730	814	412.93	16.6138	1.52194	15.4904	.//_peak_888
chr23	143306	145955	2650	307.05	13.1985	1.52193	12.1181	.//_peak_1667
chr14	446297	448094	1798	169.17	7.52725	1.52158	5.31938	.//_peak_293
chr9	29248	31769	2522	333.63	14.6814	1.52148	13.5807	.//_peak_2877
chr12	298483	299130	648	262.02	10.7841	1.52127	9.72405	.//_peak_544
chr2	1169203	1170302	1100	271.16	12.6598	1.52109	11.5953	.//_peak_1462
chr11	540461	541170	710	163.3	7.25896	1.52091	5.05677	.//_peak_170
chr4	1560681	1563967	3287	312.67	14.1199	1.52082	13.0315	.//_peak_2197
chr11	17192	18074	883	170.13	7.53805	1.52066	5.31465	.//_peak_97
chr16	250094	252211	2118	325.41	14.4127	1.52024	13.3205	.//_peak_1053
chr4	970743	972150	1408	375.3	15.2711	1.52001	14.1629	.//_peak_2109
chr1	695041	696953	1913	292.26	13.1303	1.51999	12.0506	.//_peak_55
chr9	168030	168534	505	393.85	18.0654	1.51989	16.9381	.//_peak_2889
chr8	1073318	1074752	1435	695.98	26.6847	1.51981	25.465	.//_peak_2870
chr5	354426	354775	350	428.82	17.9767	1.5196	16.8346	.//_peak_2243
chr6	1172228	1176420	4193	461.08	22.8663	1.51959	21.7091	.//_peak_2574
chr15	315833	316167	335	423.15	17.3342	1.51949	16.1969	.//_peak_958
chr7	565892	567603	1712	181	7.6464	1.51936	5.38664	.//_peak_1149
chr10	1200884	1201830	947	161.84	6.96617	1.51925	4.76635	.//_peak_96
chr8	686833	689072	2240	337.59	14.1353	1.51921	13.0366	.//_peak_2836
chr4	856239	857505	1267	349.22	14.0571	1.51904	12.955	.//_peak_2093
chr4	681538	683964	2427	289.43	13.6523	1.51846	12.5891	.//_peak_2066
chr6	317497	319418	1922	164.39	7.42223	1.51844	5.24304	.//_peak_1015
chr15	399125	401224	2100	179.62	7.82602	1.51833	5.56974	.//_peak_412
chr4	501501	501909	409	252.3	10.7103	1.5182	9.6573	.//_peak_2040
chr2	924100	924498	399	377.88	15.8522	1.51815	14.734	.//_peak_1425
chr1	513149	513656	508	309.28	12.8782	1.51791	11.7939	.//_peak_38
chr10	588438	588850	413	351.41	14.5398	1.5178	13.4346	.//_peak_272
chr12	663082	663827	746	252.75	10.6106	1.51777	9.5571	.//_peak_592
chr12	328003	328730	728	252.9	11.4414	1.51735	10.3883	.//_peak_548
chr12	238981	242183	3203	425.34	17.9326	1.51716	16.7938	.//_peak_539
chr5	1074940	1077599	2660	396.5	18.0389	1.51711	16.9176	.//_peak_2353
chr3	772632	774289	1658	449.24	19.0811	1.51683	17.9297	.//_peak_1837
chr9	604646	608621	3976	459.22	18.3749	1.51674	17.2366	.//_peak_2953
chr2	99403	99790	388	299.81	12.288	1.51628	11.2115	.//_peak_1314
chr5	103083	106645	3563	191.39	9.18886	1.51627	6.97265	.//_peak_973
chr12	66893	67234	342	470.09	18.8424	1.51613	17.6853	.//_peak_518
chr8	820885	824123	3239	588.21	25.791	1.51571	24.6021	.//_peak_2852
chr12	871125	872328	1204	264.2	10.922	1.51539	9.86351	.//_peak_607
chr3	1157788	1158127	340	251.8	10.3292	1.51488	9.27742	.//_peak_1884
chr8	403047	403356	310	256.08	10.3074	1.51473	9.25307	.//_peak_2807
chr11	1110800	1114890	4091	460.97	18.4133	1.51459	17.2656	.//_peak_505
chr5	1028003	1028377	375	306.81	12.6972	1.51422	11.6172	.//_peak_2345
chr21	426815	428049	1235	461.44	19.6782	1.51385	18.5282	.//_peak_1620
chr3	1406817	1408921	2105	162.94	6.87229	1.51376	4.68315	.//_peak_873
chr14	746497	747297	801	366.97	14.7867	1.51375	13.6783	.//_peak_876
chr2	697549	699643	2095	394.38	16.3682	1.5137	15.2526	.//_peak_1396
chr18	245095	246147	1053	316.21	13.5985	1.51341	12.5169	.//_peak_1226
chr2	1290664	1291709	1046	312.71	13.6059	1.51328	12.5231	.//_peak_1480
chr10	550736	552158	1423	343.51	14.8721	1.51314	13.7736	.//_peak_267
chr7	534400	535651	1252	196.27	8.42467	1.51309	6.11154	.//_peak_1143
chr12	339069	339820	752	328.14	14.4406	1.51291	13.3474	.//_peak_550
chr3	1232821	1234196	1376	380.13	15.3542	1.51274	14.2498	.//_peak_1892
chr4	523731	524603	873	386.84	16.3109	1.51259	15.189	.//_peak_2044
chr5	827996	828326	331	338.39	13.8654	1.51198	12.7702	.//_peak_2313
chr14	613121	615758	2638	435.71	18.2266	1.51164	17.0904	.//_peak_859
chr8	1073592	1074541	950	160.91	7.15251	1.51143	5.00254	.//_peak_1229
chr8	920614	921390	777	931.71	35.5677	1.51142	34.2544	.//_peak_2859
chr9	679948	681086	1139	315.87	14.1398	1.51134	13.0558	.//_peak_2965
chr7	143189	145123	1935	434.56	17.0263	1.51115	15.8887	.//_peak_2634
chr11	331368	332447	1080	162.76	6.955	1.51106	4.77531	.//_peak_144
chr2	96067	97124	1058	358.18	16.2405	1.51085	15.1369	.//_peak_1313
chr3	131203	132227	1025	354.93	14.1079	1.51081	13.007	.//_peak_1763
chr31	43713	44598	886	389.41	16.7166	1.51075	15.5967	.//_peak_1947
chr4	253085	255961	2877	315.43	12.7113	1.5101	11.6377	.//_peak_2007
chr2	9203	10292	1090	223.94	9.21843	1.51007	6.81677	.//_peak_587
chr17	475710	476029	320	310.47	12.5289	1.50976	11.4485	.//_peak_1174
chr5	880723	881273	551	395.52	14.8959	1.50957	13.7771	.//_peak_2323
chr17	410552	412422	1871	177.86	7.65724	1.50944	5.42642	.//_peak_538
chr17	115598	116661	1064	178.13	7.44496	1.50938	5.19906	.//_peak_491
chr11	228055	229026	972	389.26	17.1407	1.50906	16.019	.//_peak_386
chr15	87922	90428	2507	199.45	8.6746	1.50896	6.37111	.//_peak_377
chr3	1140997	1141518	522	160.34	6.8526	1.50874	4.68529	.//_peak_850
chr15	73331	74737	1407	400.06	18.4227	1.50831	17.2968	.//_peak_930
chr3	1300494	1301743	1250	275.12	11.1919	1.50817	10.1297	.//_peak_1904
chr14	795430	795770	341	373.19	14.7746	1.50802	13.6653	.//_peak_881
chr17	246141	247030	890	817.79	31.4811	1.50791	30.2118	.//_peak_1147
chr13	162038	163032	995	252.4	10.9926	1.50789	9.94332	.//_peak_654
chr11	210529	211265	737	409.5	16.0424	1.50683	14.9298	.//_peak_383
chr7	441249	443514	2266	428.6	17.8245	1.50621	16.6925	.//_peak_2681
chr4	1027663	1028065	403	160.04	6.71667	1.50602	4.55375	.//_peak_931
chr2	1146538	1147774	1237	314.78	13.6431	1.50573	12.559	.//_peak_1458
chr22	256421	258826	2406	182.61	7.52162	1.50549	5.29176	.//_peak_735
chr1	808367	809558	1192	160.74	6.79568	1.50545	4.63384	.//_peak_14
chr4	532308	532626	319	322.56	12.3696	1.50539	11.2862	.//_peak_2046
chr13	1053423	1054810	1388	309.93	14.0134	1.50486	12.9344	.//_peak_779
chr6	1421099	1421429	331	572.29	22.2158	1.50479	21.0253	.//_peak_2601
chr15	434073	435486	1414	526.73	20.6769	1.50471	19.5076	.//_peak_976
chr16	185305	186064	760	361.78	14.6441	1.5045	13.5429	.//_peak_1045
chr11	172907	173729	823	798.09	30.3185	1.50449	29.0573	.//_peak_378
chr24	263425	264031	607	334.2	14.1251	1.50429	13.0364	.//_peak_1707
chr3	1081381	1081708	328	310.83	12.5526	1.50393	11.4754	.//_peak_1872
chr21	161184	162529	1346	162.86	6.91968	1.50367	4.76194	.//_peak_687
chr14	712920	715974	3055	655.16	25.5555	1.50365	24.3314	.//_peak_873
chr20	202697	203761	1065	617.82	27.1053	1.50354	25.8905	.//_peak_1546
chr12	1083200	1084353	1154	337.62	13.2496	1.50283	12.1606	.//_peak_629
chr4	421544	422152	609	284.41	11.0969	1.5027	10.0335	.//_peak_2030
chr21	456320	461567	5248	446.23	18.666	1.50254	17.5404	.//_peak_1622
chr3	1387354	1388960	1607	168.66	6.85937	1.5024	4.66901	.//_peak_870
chr10	728690	729043	354	408.39	15.7133	1.502	14.5936	.//_peak_291
chr8	707017	709763	2747	332.03	13.8499	1.50191	12.7633	.//_peak_2840
chr13	107508	108155	648	249.58	10.2458	1.50181	9.20045	.//_peak_646
chr6	744919	747017	2099	514.47	18.5567	1.50169	17.3979	.//_peak_2511
chr9	438947	440457	1511	332.46	13.7178	1.5016	12.6336	.//_peak_2927
chr14	579817	580171	355	441.22	17.1704	1.50134	16.0352	.//_peak_852
chr1	46029	46968	940	463.69	15.991	1.5012	14.8683	.//_peak_3
chr15	624026	625477	1452	249.44	9.72686	1.50104	8.68168	.//_peak_993
chr18	30070	31219	1150	267.79	10.7346	1.50013	9.68218	.//_peak_1203
chr20	116157	117882	1726	209.23	8.32098	1.49922	5.9818	.//_peak_638
chr17	289844	291681	1838	746.9	29.125	1.49922	27.8731	.//_peak_1154
chr6	100575	101962	1388	315.91	12.5502	1.49908	11.4722	.//_peak_2422
chr18	420500	421285	786	159.42	6.44228	1.49896	4.29662	.//_peak_573
chr2	1316462	1317183	722	159.26	6.58804	1.4987	4.44409	.//_peak_624
chr11	422455	424276	1822	441.95	18.9344	1.49818	17.7999	.//_peak_420
chr14	155840	156188	349	257	9.91348	1.49786	8.86566	.//_peak_800
chr16	283060	285896	2837	394.93	17.417	1.49778	16.3048	.//_peak_1057
chr1	601816	602122	307	332.68	12.929	1.49774	11.8436	.//_peak_46
chr5	619312	619719	408	289.12	11.1707	1.49715	10.1062	.//_peak_2278
chr1	1218228	1220357	2130	362.83	13.3451	1.49706	12.2509	.//_peak_125
chr11	275725	278695	2971	377.49	14.8934	1.49677	13.7894	.//_peak_397
chr11	829055	829366	312	397	15.5993	1.49639	14.4841	.//_peak_471
chr1	1267452	1269671	2220	346.34	15.4812	1.49628	14.3876	.//_peak_132
chr13	429260	429891	632	336.31	14.3828	1.49602	13.2958	.//_peak_690
chr2	1087733	1088149	417	158.95	6.37892	1.49582	4.24284	.//_peak_612
chr8	257811	260769	2959	424.45	18.1722	1.49569	17.0528	.//_peak_2793
chr7	898563	899439	877	165.22	6.67698	1.49563	4.51936	.//_peak_1164
chr3	1133467	1133703	237	159.2	6.38911	1.49562	4.25215	.//_peak_849
chr15	68017	68775	759	411.01	15.6387	1.49545	14.5196	.//_peak_929
chr16	445234	445548	315	284.99	10.8763	1.4954	9.81553	.//_peak_1074
chr7	277193	277792	600	158.91	6.42533	1.49537	4.29023	.//_peak_1101
chr10	247915	249020	1106	199.03	8.01975	1.49533	5.72145	.//_peak_67
chr1	1221696	1223195	1500	408.07	15.5792	1.49518	14.46	.//_peak_126
chr15	845785	846089	305	409.52	15.4101	1.49477	14.2923	.//_peak_1018
chr1	8747	10549	1803	161.55	6.55741	1.49474	4.41915	.//_peak_1
chr9	1172533	1172837	305	426.08	16.4483	1.49464	15.3216	.//_peak_3030
chr7	385126	385456	331	336.49	12.6494	1.49458	11.5647	.//_peak_2672
chr5	52429	53780	1352	158.77	6.65263	1.49414	4.53399	.//_peak_966
chr4	417785	420149	2365	491.13	18.0205	1.49414	16.8724	.//_peak_2029
chr1	452026	452343	318	314.32	11.7741	1.49412	10.6994	.//_peak_32
chr7	259815	260155	341	260.38	10.0664	1.49383	9.01958	.//_peak_2650
chr6	739690	741384	1695	342.86	15.4383	1.49362	14.3513	.//_peak_2509
chr12	564890	565249	360	363.44	14.2102	1.49349	13.1116	.//_peak_578
chr1	835393	836090	698	364.93	16.1115	1.49279	15.0089	.//_peak_73
chr6	31443	32741	1299	291.79	11.4167	1.49257	10.3528	.//_peak_2412
chr10	505392	506540	1149	271.14	10.3483	1.49252	9.29618	.//_peak_260
chr1	1060332	1061056	725	309.74	13.1587	1.49221	12.0857	.//_peak_107
chr3	1475736	1478431	2696	509.1	21.5429	1.49218	20.3838	.//_peak_1925
chr13	752526	753809	1284	688.81	27.6246	1.49209	26.4211	.//_peak_731
chr11	105619	106417	799	158.46	6.29534	1.4912	4.17276	.//_peak_111
chr2	888471	895099	6629	343.14	13.6021	1.49111	12.5192	.//_peak_1423
chr6	1475649	1475978	330	577.75	21.8538	1.49104	20.6702	.//_peak_2612
chr13	409156	411150	1995	345.8	13.3536	1.491	12.2698	.//_peak_688
chr3	37688	40744	3057	415.82	17.0777	1.4909	15.9575	.//_peak_1749
chr2	1617056	1623866	6811	262.61	10.6461	1.49086	9.59777	.//_peak_1516
chr12	83834	86084	2251	158.42	6.46804	1.49083	4.35115	.//_peak_217
chr2	711015	712536	1522	320.69	11.8385	1.49083	10.7642	.//_peak_1397
chr2	1048972	1049349	378	393.58	15.1973	1.49019	14.0871	.//_peak_1439
chr15	4233	4991	759	160.05	6.39433	1.49008	4.27105	.//_peak_367
chr17	726546	726987	442	268.68	10.1596	1.48959	9.10911	.//_peak_1190
chr17	191315	192861	1547	722.61	25.1944	1.48955	23.9891	.//_peak_1141
chr5	455370	456245	876	158.28	6.3548	1.48949	4.23997	.//_peak_986
chr10	784630	785025	396	302.85	11.8399	1.4893	10.7711	.//_peak_300
chr5	982370	984169	1800	411.63	15.3249	1.48927	14.2223	.//_peak_2335
chr3	284815	285725	911	256.97	10.9536	1.48916	9.91074	.//_peak_1786
chr5	237867	239775	1909	158.86	6.31507	1.48853	4.20074	.//_peak_976
chr11	1018722	1020698	1977	159.8	6.82688	1.48849	4.73934	.//_peak_209
chr1	1241993	1244954	2962	377.3	14.6595	1.48843	13.5632	.//_peak_128
chr11	292795	296213	3419	598.37	25.027	1.48825	23.8665	.//_peak_398
chr6	196850	197937	1088	337.38	13.4321	1.48817	12.3557	.//_peak_2432
chr14	674264	674609	346	453.63	17.5105	1.48813	16.3757	.//_peak_869
chr1	1264997	1265777	781	368.41	13.9625	1.48796	12.869	.//_peak_131
chr3	300823	303411	2589	284.41	11.4291	1.48793	10.3716	.//_peak_1788
chr3	1306871	1308009	1139	158.09	6.31527	1.4877	4.2002	.//_peak_859
chr6	1142104	1143543	1440	288.66	12.4594	1.48754	11.3964	.//_peak_2571
chr11	228357	229277	921	158.62	6.3836	1.48753	4.27507	.//_peak_130
chr6	1449569	1451449	1881	490.32	18.0594	1.48732	16.9124	.//_peak_2606
chr12	581323	582154	832	400.89	14.4786	1.48725	13.3697	.//_peak_581
chr12	660273	660656	384	247.27	9.58342	1.48723	8.54546	.//_peak_591
chr1	1727000	1728398	1399	175.65	6.99592	1.487	4.81909	.//_peak_50
chr5	688534	689341	808	346.86	13.5476	1.487	12.4628	.//_peak_2289
chr7	304226	306688	2463	159.14	6.24677	1.48682	4.13613	.//_peak_1105
chr9	921536	924149	2614	423.68	17.5243	1.48666	16.4054	.//_peak_2996
chr2	155582	157694	2113	399.51	16.0381	1.48642	14.9263	.//_peak_1322
chr19	125869	126677	809	246.93	9.41184	1.48601	8.37423	.//_peak_1274
chr22	268065	269403	1339	160.62	6.29973	1.486	4.18516	.//_peak_737
chr14	950692	952283	1592	163.97	6.39868	1.48592	4.26948	.//_peak_356
chr9	443877	445102	1226	157.89	6.20825	1.48583	4.10043	.//_peak_1248
chr11	681204	681914	711	483.18	17.3303	1.48561	16.1903	.//_peak_455
chr15	873123	873371	249	157.86	6.15942	1.48558	4.05224	.//_peak_454
chr1	1572088	1572610	523	362.58	13.8144	1.4855	12.7266	.//_peak_169
chr15	717672	718075	404	461.48	17.2864	1.48525	16.1517	.//_peak_1005
chr10	914758	915289	532	346.96	13.6636	1.48512	12.5777	.//_peak_320
chr13	644655	644960	306	273.19	10.4105	1.48451	9.36031	.//_peak_719
chr14	246054	247751	1698	519.32	17.3165	1.48446	16.1923	.//_peak_814
chr3	1437100	1439703	2604	606.61	23.2562	1.48352	22.0739	.//_peak_1920
chr16	614228	614586	359	198.95	7.74332	1.48327	5.48703	.//_peak_478
chr31	6372	9357	2986	266.01	10.8936	1.48299	9.84917	.//_peak_1943
chr12	501849	503555	1707	346.42	12.8564	1.4827	11.7728	.//_peak_566
chr17	273011	274834	1824	378.38	19.886	1.48252	18.7752	.//_peak_1151
chr2	992603	994600	1998	362.51	13.3981	1.48209	12.3067	.//_peak_1433
chr7	495234	497216	1983	165.88	6.53424	1.4814	4.41464	.//_peak_1140
chr5	448277	449359	1083	323.89	12.8647	1.48112	11.7917	.//_peak_2257
chr6	773657	773997	341	254.28	9.45065	1.48111	8.41093	.//_peak_2516
chr6	807103	808663	1561	157.38	6.05874	1.48109	3.96468	.//_peak_1025
chr21	176641	179510	2870	166.36	6.6332	1.48106	4.51412	.//_peak_689
chr11	920497	920868	372	350.09	13.0733	1.48083	11.9867	.//_peak_483
chr5	1317538	1321259	3722	291.03	11.6514	1.48078	10.596	.//_peak_2379
chr5	721646	721956	311	345.36	12.4132	1.4805	11.3312	.//_peak_2294
chr17	130634	133509	2876	464.75	18.025	1.48048	16.8899	.//_peak_1133
chr18	547671	548678	1008	414.51	17.0587	1.48044	15.9479	.//_peak_1255
chr33	152	3687	3536	313.99	12.9072	1.48023	11.8385	.//_peak_1955
chr2	1135487	1137710	2224	510.66	17.5281	1.47987	16.3953	.//_peak_1456
chr4	958170	958556	387	347.7	12.7238	1.47958	11.6412	.//_peak_2106
chr18	149934	152166	2233	157.17	6.14425	1.47916	4.05631	.//_peak_560
chr14	808135	808455	321	444.64	16.0038	1.47909	14.8809	.//_peak_882
chr5	1017213	1017881	669	162.68	6.30196	1.47895	4.19458	.//_peak_993
chr11	380398	381156	759	161.04	6.39461	1.47868	4.30256	.//_peak_150
chr21	298581	300180	1600	346.26	13.0681	1.4785	11.9866	.//_peak_1605
chr5	235088	235598	511	355.4	12.203	1.47848	11.1182	.//_peak_2231
chr7	369996	378791	8796	326.41	18.5072	1.47839	17.4199	.//_peak_2670
chr15	837495	840453	2959	468.49	16.1913	1.47814	15.0763	.//_peak_1016
chr17	319249	319607	359	200.86	7.41873	1.47764	5.16627	.//_peak_523
chr13	368357	368785	429	268.2	9.69219	1.47747	8.64768	.//_peak_682
chr22	31666	31925	260	157	6.0942	1.47745	4.01123	.//_peak_727
chr29	26431	26775	345	310.76	11.4472	1.47721	10.3815	.//_peak_1743
chr15	167525	168222	698	156.96	6.1862	1.47713	4.10443	.//_peak_386
chr25	745	2359	1615	184.9	7.03267	1.47705	4.85114	.//_peak_793
chr5	866472	869171	2700	365.84	14.8641	1.47643	13.7706	.//_peak_2320
chr11	132247	133427	1181	156.86	6.16574	1.47621	4.08649	.//_peak_115
chr17	807025	807519	495	340.96	11.8459	1.47613	10.7687	.//_peak_1199
chr4	710457	711971	1515	262.69	9.95306	1.4759	8.91183	.//_peak_2068
chr4	919622	920092	471	359.46	12.7936	1.4759	11.7065	.//_peak_2102
chr23	154470	157155	2686	301.21	11.4444	1.47571	10.3842	.//_peak_1668
chr5	1460227	1460677	451	245.21	8.92606	1.47567	7.89328	.//_peak_2398
chr4	1014439	1017428	2990	378.54	14.2105	1.47534	13.1155	.//_peak_2118
chr3	1342173	1344520	2348	161.17	6.26584	1.47528	4.17533	.//_peak_863
chr6	435522	435922	401	293.54	10.6249	1.4751	9.56741	.//_peak_2459
chr11	1081145	1083174	2030	245.11	10.2298	1.47508	9.19822	.//_peak_502
chr7	1240415	1242818	2404	908.94	34.5329	1.47504	33.2599	.//_peak_2770
chr10	529190	530580	1391	245.06	9.25959	1.47479	8.22763	.//_peak_264
chr13	44180	44671	492	245.46	9.20693	1.47474	8.17454	.//_peak_642
chr1	1766335	1769356	3022	168.34	6.42189	1.4746	4.303	.//_peak_56
chr11	144038	144823	786	157.42	5.9996	1.47441	3.92162	.//_peak_116
chr2	861063	862212	1150	288.62	11.1779	1.47438	10.1227	.//_peak_1418
chr14	502918	505048	2131	365.73	14.2795	1.47426	13.1876	.//_peak_842
chr5	470973	472275	1303	318.71	11.8589	1.47426	10.7911	.//_peak_2261
chr12	527878	529315	1438	156.56	6.33394	1.47343	4.27513	.//_peak_223
chr7	422464	423477	1014	418.83	15.0335	1.47339	13.9296	.//_peak_2678
chr17	349666	350324	659	206.17	7.54806	1.47311	5.27574	.//_peak_528
chr18	227385	227860	476	381.75	13.9991	1.47273	12.9073	.//_peak_1223
chr20	483148	483664	517	267.44	9.70049	1.47271	8.6581	.//_peak_1579
chr15	864875	865352	478	447.12	16.765	1.47266	15.6421	.//_peak_1020
chr7	414109	416585	2477	156.52	5.99303	1.47223	3.92453	.//_peak_1126
chr15	768892	772485	3594	421.08	16.4228	1.47222	15.3093	.//_peak_1011
chr20	490550	491535	986	159.67	6.01808	1.47171	3.93919	.//_peak_684
chr19	74756	75621	866	261.68	9.85111	1.47156	8.81448	.//_peak_1272
chr6	230100	233454	3355	441.84	17.106	1.47153	15.9836	.//_peak_2435
chr1	1499974	1501337	1364	363.21	14.2886	1.47146	13.1977	.//_peak_160
chr1	1717420	1718520	1101	170.79	6.34207	1.47108	4.21803	.//_peak_47
chr15	749034	750348	1315	156.29	6.20014	1.47087	4.14235	.//_peak_444
chr5	552790	554022	1233	429.01	15.1593	1.47075	14.0467	.//_peak_2267
chr9	803379	804994	1616	156.25	5.82474	1.47049	3.76109	.//_peak_1259
chr3	830023	830451	429	160.28	6.13082	1.47031	4.05907	.//_peak_831
chr8	782898	783457	560	815.13	27.698	1.47016	26.4602	.//_peak_2849
chr14	738230	738906	677	177.68	6.5347	1.46965	4.38563	.//_peak_324
chr10	360327	362028	1702	156.6	5.94025	1.46962	3.87679	.//_peak_72
chr11	70867	72143	1277	421.3	14.3783	1.46959	13.2706	.//_peak_363
chr9	521255	521642	388	302.09	10.9785	1.46946	9.91922	.//_peak_2942
chr10	934798	936736	1939	161.23	6.43314	1.46934	4.37382	.//_peak_92
chr5	93092	94415	1324	222.47	8.05758	1.46903	5.74042	.//_peak_972
chr14	193477	193885	409	631.9	22.2272	1.46893	21.0375	.//_peak_806
chr12	188344	189524	1181	247.96	9.69782	1.46874	8.66873	.//_peak_531
chr10	574248	574606	359	307.78	11.4135	1.46867	10.3524	.//_peak_269
chr5	1288909	1289346	438	435.91	15.9668	1.46852	14.8506	.//_peak_2376
chr12	72009	72559	551	335	12.0175	1.4684	10.946	.//_peak_519
chr6	551699	552000	302	446.57	15.7323	1.46838	14.6129	.//_peak_2480
chr1	794310	794672	363	345.81	12.3683	1.46834	11.292	.//_peak_67
chr9	953792	954761	970	155.98	6.10187	1.46791	4.05057	.//_peak_1281
chr6	982161	982900	740	322.5	12.5371	1.46723	11.4688	.//_peak_2545
chr11	909707	910315	609	245.58	9.3123	1.46721	8.2838	.//_peak_481
chr10	312641	312979	339	155.88	5.84592	1.46709	3.79157	.//_peak_70
chr11	368378	375148	6771	169.45	6.32317	1.467	4.22063	.//_peak_148
chr17	109970	114493	4524	168.72	6.55789	1.46631	4.4801	.//_peak_490
chr12	513463	515120	1658	155.78	6.02398	1.46616	3.97857	.//_peak_222
chr15	330197	330641	445	155.78	5.79438	1.4661	3.74205	.//_peak_407
chr14	639016	639572	557	447.33	15.5648	1.46601	14.4461	.//_peak_862
chr1	598554	598953	400	279.56	9.79162	1.46594	8.74612	.//_peak_45
chr7	1264552	1265186	635	794.54	27.4884	1.46572	26.2511	.//_peak_2772
chr10	923183	923779	597	159.06	5.94878	1.4657	3.8868	.//_peak_91
chr9	968027	969436	1410	368.01	13.4819	1.4653	12.3985	.//_peak_3005
chr4	412840	414757	1918	155.93	5.8884	1.46529	3.83877	.//_peak_909
chr10	428195	430435	2241	291.39	11.6677	1.46528	10.6231	.//_peak_252
chr23	127936	128226	291	165.36	6.13214	1.46522	4.04618	.//_peak_771
chr15	421883	422202	320	155.74	5.78869	1.46494	3.73994	.//_peak_414
chr17	182477	183344	868	531.34	17.2451	1.46453	16.126	.//_peak_1139
chr9	840171	841023	853	169.86	6.27742	1.46433	4.17657	.//_peak_1262
chr17	407087	408080	994	605.5	21.7279	1.46412	20.5526	.//_peak_1169
chr9	1187343	1187653	311	159.4	5.86671	1.46407	3.81021	.//_peak_1313
chr2	1104232	1105364	1133	155.54	5.78872	1.46392	3.74212	.//_peak_613
chr15	416786	417851	1066	290.96	10.001	1.46381	8.95167	.//_peak_974
chr7	610395	610799	405	155.53	5.71844	1.46379	3.6734	.//_peak_1152
chr20	126888	128867	1980	213.77	7.86035	1.46375	5.60022	.//_peak_640
chr5	775024	776150	1127	428.06	13.9077	1.46334	12.8084	.//_peak_2303
chr13	731707	734175	2469	325.88	12.3275	1.46306	11.2605	.//_peak_728
chr3	725728	726200	473	311.24	10.9705	1.46276	9.91283	.//_peak_1833
chr4	673365	675696	2332	289.5	10.5005	1.4627	9.45145	.//_peak_2064
chr6	17941	19558	1618	187.16	6.99429	1.46263	4.8411	.//_peak_1011
chr13	607977	609946	1970	339.02	11.9928	1.46255	10.9251	.//_peak_715
chr5	1254797	1255479	683	474.7	15.7337	1.46255	14.6088	.//_peak_2371
chr14	663607	663873	267	155.39	5.72483	1.46245	3.68252	.//_peak_316
chr8	58895	59241	347	411.14	13.7394	1.46234	12.6395	.//_peak_2779
chr2	1435832	1438840	3009	358.72	13.5302	1.46196	12.4519	.//_peak_1495
chr7	479613	479874	262	181.92	6.53716	1.46189	4.38927	.//_peak_1136
chr15	517436	518651	1216	444.68	14.3483	1.4616	13.2355	.//_peak_984
chr15	650792	651730	939	155.27	5.81989	1.46138	3.7831	.//_peak_434
chr3	1385822	1386307	486	527.18	18.7733	1.46107	17.6241	.//_peak_1916
chr14	388420	389142	723	166.88	6.14596	1.4607	4.06331	.//_peak_286
chr7	1275275	1277172	1898	254.44	9.36877	1.46068	8.33945	.//_peak_2774
chr15	23390	24259	870	168.04	6.22854	1.46067	4.14651	.//_peak_371
chr1	57119	58260	1142	155.19	5.66775	1.46043	3.63241	.//_peak_4
chr20	162011	164293	2283	215.49	7.8902	1.46014	5.64324	.//_peak_645
chr17	374210	375117	908	506.13	20.059	1.46007	18.9145	.//_peak_1166
chr15	956456	958869	2414	419.87	15.076	1.45994	13.9783	.//_peak_1025
chr10	179260	181530	2271	364.66	12.6165	1.4596	11.5367	.//_peak_216
chr1	1365197	1366018	822	155.07	5.60503	1.45946	3.57295	.//_peak_29
chr11	605010	610609	5600	155.35	5.73719	1.45936	3.70461	.//_peak_178
chr20	71298	73107	1810	389.7	13.6198	1.45925	12.5304	.//_peak_1526
chr11	224918	226161	1244	410.88	14.9807	1.45892	13.8805	.//_peak_385
chr2	345581	346014	434	307.49	10.3992	1.45867	9.34406	.//_peak_1347
chr5	171305	171666	362	259.66	9.17392	1.45856	8.1415	.//_peak_2222
chr15	674505	675114	610	321.29	11.2172	1.4585	10.1549	.//_peak_999
chr6	1020728	1021488	761	407.61	14.5326	1.45845	13.4331	.//_peak_2551
chr9	922168	923171	1004	154.93	5.6283	1.45822	3.5992	.//_peak_1274
chr4	1118345	1120211	1867	155.01	5.77735	1.45811	3.74874	.//_peak_938
chr13	637189	638641	1453	338.76	11.4566	1.45793	10.3875	.//_peak_718
chr13	691303	691935	633	315.51	11.48	1.45791	10.4209	.//_peak_724
chr3	1034241	1034685	445	392.52	13.4964	1.45784	12.4042	.//_peak_1861
chr13	521314	521923	610	316.06	11.1826	1.45755	10.1269	.//_peak_703
chr16	305454	305798	345	154.86	5.74115	1.4575	3.71349	.//_peak_465
chr9	978215	979152	938	914.82	35.0122	1.45743	33.759	.//_peak_3007
chr1	1379595	1381911	2317	154.84	5.8174	1.45737	3.79529	.//_peak_30
chr1	701111	702373	1263	264.21	10.2846	1.45715	9.2482	.//_peak_56
chr10	187569	189103	1535	425.03	16.0732	1.45715	14.9633	.//_peak_218
chr31	23518	25342	1825	155.5	5.75391	1.45695	3.72761	.//_peak_887
chr16	357265	359502	2238	274.92	9.68939	1.45679	8.65008	.//_peak_1068
chr6	84648	87004	2357	281.08	9.73706	1.45678	8.69827	.//_peak_2419
chr4	104028	106013	1986	520.36	18.3157	1.45643	17.1748	.//_peak_1981
chr9	1129755	1131832	2078	418.22	14.4822	1.45623	13.3816	.//_peak_3024
chr18	274939	276393	1455	154.68	5.71114	1.45578	3.68885	.//_peak_566
chr11	508190	510460	2271	155.78	5.68691	1.4553	3.66382	.//_peak_165
chr2	982924	986224	3301	154.62	5.63371	1.45526	3.61287	.//_peak_607
chr4	1555815	1556267	453	154.62	5.61072	1.45524	3.58895	.//_peak_959
chr10	1091943	1093297	1355	269.78	9.76426	1.45462	8.73151	.//_peak_341
chr22	412529	414487	1959	228.96	8.31736	1.45445	6.04571	.//_peak_745
chr7	501859	502604	746	428.91	15.9994	1.45419	14.8964	.//_peak_2688
chr2	1475605	1477729	2125	335.63	12.1642	1.45415	11.1076	.//_peak_1500
chr5	381788	382756	969	303.69	9.91993	1.45399	8.87529	.//_peak_2247
chr10	709302	710974	1673	313.02	10.321	1.45383	9.26718	.//_peak_286
chr13	203496	204205	710	246.05	8.20492	1.45371	7.18034	.//_peak_660
chr23	193946	199399	5454	189.39	6.683	1.45343	4.53737	.//_peak_784
chr14	108895	109968	1074	290.69	10.0897	1.45343	9.04509	.//_peak_794
chr7	359576	361763	2188	154.41	5.62194	1.45332	3.608	.//_peak_1115
chr6	1240921	1241405	485	279.54	9.55428	1.45317	8.51484	.//_peak_2581
chr9	946904	947593	690	154.66	5.74588	1.45306	3.73219	.//_peak_1280
chr9	477598	478728	1131	296.53	10.2237	1.4525	9.17745	.//_peak_2934
chr9	53639	53950	312	241.28	8.09473	1.45214	7.0733	.//_peak_2879
chr11	180293	183609	3317	154.66	5.66072	1.45206	3.65289	.//_peak_124
chr4	1080446	1080701	256	157.14	5.54438	1.45172	3.52622	.//_peak_933
chr19	132566	132894	329	192.24	6.62126	1.45126	4.45637	.//_peak_582
chr15	605399	606446	1048	386.32	13.3824	1.45102	12.2984	.//_peak_990
chr4	1072998	1075093	2096	488.95	16.5218	1.45096	15.3963	.//_peak_2125
chr14	655042	661232	6191	155.66	5.76875	1.45077	3.75975	.//_peak_315
chr14	702030	706513	4484	459.61	15.1554	1.45054	14.0472	.//_peak_872
chr14	204461	206058	1598	166.59	6.05654	1.45023	4.00739	.//_peak_261
chr14	503972	504214	243	154.06	5.49721	1.45007	3.49035	.//_peak_300
chr11	186021	187884	1864	154.05	5.50916	1.44995	3.50293	.//_peak_125
chr23	11591	14859	3269	244.26	8.36125	1.4498	7.33962	.//_peak_1651
chr5	10824	14751	3928	227.27	7.84537	1.44978	5.57964	.//_peak_961
chr9	1103415	1104462	1048	154.03	5.47586	1.44972	3.47128	.//_peak_1303
chr4	807782	811117	3336	331.59	13.2231	1.44959	12.1595	.//_peak_2084
chr5	439605	440281	677	324.13	10.9932	1.44913	9.93514	.//_peak_2255
chr6	1273064	1275161	2098	240.79	8.32783	1.44912	7.30845	.//_peak_2583
chr8	1126258	1130778	4521	170.62	6.1142	1.44906	4.05302	.//_peak_1231
chr1	1692691	1695606	2916	188.44	6.63424	1.44903	4.50915	.//_peak_44
chr16	345893	348996	3104	155.33	5.62184	1.44898	3.61464	.//_peak_466
chr3	973960	975329	1370	154.13	5.61182	1.44895	3.61113	.//_peak_842
chr5	1290947	1295328	4382	406.33	15.0565	1.44893	13.9641	.//_peak_2377
chr2	134825	135413	589	425.69	13.3944	1.44856	12.2962	.//_peak_1319
chr4	1421065	1421624	560	155.53	5.53675	1.44822	3.52947	.//_peak_953
chr21	387038	388352	1315	443.99	16.0918	1.44821	14.9833	.//_peak_1616
chr23	140312	142236	1925	189.01	6.63717	1.4482	4.50473	.//_peak_774
chr11	314796	315264	469	153.85	5.52962	1.44813	3.52841	.//_peak_141
chr5	1220913	1222333	1421	413.11	14.6034	1.44795	13.5098	.//_peak_2367
chr4	1226414	1227380	967	567.57	18.0544	1.4477	16.9174	.//_peak_2148
chr3	1351819	1353492	1674	353.03	12.3626	1.44763	11.2944	.//_peak_1913
chr11	48320	50010	1691	153.89	5.54149	1.44753	3.54161	.//_peak_103
chr8	973177	975310	2134	170.49	5.97039	1.4474	3.92462	.//_peak_1224
chr14	124539	130747	6209	294.69	12.9239	1.44726	11.8739	.//_peak_797
chr13	994437	995387	951	278.2	10.0264	1.44695	8.98755	.//_peak_768
chr15	485609	486348	740	378.58	12.0023	1.44694	10.9232	.//_peak_981
chr5	1332628	1333356	729	289.01	9.73045	1.44661	8.68889	.//_peak_2381
chr11	332854	333667	814	427.35	14.7309	1.44651	13.6305	.//_peak_401
chr1	1779638	1780526	889	179.78	6.19351	1.44646	4.09785	.//_peak_58
chr4	658210	660392	2183	156.46	5.69325	1.44623	3.69061	.//_peak_919
chr15	62644	66439	3796	565.53	17.9836	1.44607	16.8439	.//_peak_928
chr8	632509	632868	360	204.91	6.85641	1.44601	4.65848	.//_peak_1198
chr17	482783	485385	2603	153.64	5.40288	1.44598	3.40854	.//_peak_545
chr5	844509	845987	1479	343.34	11.746	1.44596	10.688	.//_peak_2316
chr10	544268	545239	972	282	9.46738	1.44578	8.43119	.//_peak_266
chr4	42664	42983	320	528.18	17.0756	1.44566	15.9395	.//_peak_1975
chr15	160139	160575	437	535.87	17.2457	1.44545	16.1068	.//_peak_936
chr6	314712	316071	1360	332.45	11.908	1.44543	10.846	.//_peak_2443
chr5	298195	298762	568	153.54	5.38325	1.44519	3.39141	.//_peak_977
chr17	56092	56337	246	189.29	6.47728	1.44507	4.34447	.//_peak_486
chr11	948644	948955	312	294.59	9.63273	1.44499	8.59101	.//_peak_489
chr17	439463	440756	1294	172.31	6.01362	1.44496	3.94792	.//_peak_544
chr7	700590	700931	342	243.11	8.02553	1.44485	7.00662	.//_peak_2716
chr11	706569	709413	2845	511.77	17.0464	1.44429	15.9173	.//_peak_458
chr2	304633	305078	446	344.65	11.6388	1.44426	10.573	.//_peak_1341
chr8	697048	697411	364	381.56	12.715	1.44407	11.6351	.//_peak_2838
chr7	73294	74558	1265	529.86	16.7575	1.44404	15.6242	.//_peak_2624
chr14	64051	66740	2690	372.45	13.6961	1.44393	12.6172	.//_peak_789
chr4	1001531	1002138	608	153.39	5.47119	1.44377	3.4822	.//_peak_930
chr6	186108	188633	2526	278.04	10.6946	1.44367	9.65946	.//_peak_2430
chr9	946620	947690	1071	323.33	11.0894	1.44355	10.0349	.//_peak_3000
chr17	255134	255583	450	640.27	20.199	1.44331	19.027	.//_peak_1149
chr15	478948	481487	2540	154.02	5.6274	1.44329	3.6427	.//_peak_423
chr6	844131	844947	817	561.67	18.2219	1.44326	17.0759	.//_peak_2528
chr11	120403	121898	1496	318.48	11.2432	1.44287	10.1918	.//_peak_370
chr1	1693835	1694985	1151	402.6	15.9959	1.44277	14.9058	.//_peak_180
chr8	405354	405704	351	427.97	14.3804	1.44272	13.2831	.//_peak_2808
chr16	104393	108172	3780	153.27	5.44686	1.44262	3.46303	.//_peak_462
chr12	1016316	1016625	310	294.54	9.59756	1.4426	8.55583	.//_peak_621
chr8	394482	396012	1531	286.04	9.14077	1.44233	8.1064	.//_peak_2806
chr14	388738	389992	1255	866.25	28.2804	1.44217	27.0558	.//_peak_830
chr2	27669	28631	963	153.21	5.42732	1.44213	3.44387	.//_peak_588
chr3	1088465	1089846	1382	387.57	13.0824	1.442	12.0017	.//_peak_1873
chr8	754800	756526	1727	330.88	11.22	1.44191	10.1732	.//_peak_2848
chr3	1239664	1240665	1002	331.19	11.1466	1.44179	10.0879	.//_peak_1893
chr17	359912	361743	1832	186.28	6.32134	1.44162	4.21144	.//_peak_530
chr7	380908	381827	920	153.16	5.2778	1.4416	3.29644	.//_peak_1118
chr11	293133	293379	247	180.57	6.06701	1.44159	3.98086	.//_peak_138
chr9	943921	945194	1274	160.15	5.51974	1.44126	3.51718	.//_peak_1279
chr14	846840	848069	1230	157.8	5.4793	1.44121	3.48454	.//_peak_339
chr15	2109	2376	268	154.11	5.30021	1.4411	3.31833	.//_peak_366
chr20	293503	294159	657	198.31	6.5574	1.4407	4.40497	.//_peak_667
chr4	224427	224864	438	363.5	11.2496	1.4407	10.1812	.//_peak_2001
chr7	308215	308851	637	154.24	5.30328	1.44051	3.32639	.//_peak_1106
chr1	1747214	1747744	531	664.79	20.161	1.44046	18.9843	.//_peak_188
chr4	1443663	1445260	1598	167.92	5.74452	1.44031	3.70604	.//_peak_954
chr7	401866	402210	345	436.64	13.7879	1.43992	12.69	.//_peak_2674
chr8	1034491	1036658	2168	157.3	5.54545	1.43988	3.55368	.//_peak_1227
chr19	170446	171417	972	282.67	9.03046	1.43961	7.99535	.//_peak_1279
chr22	375535	380883	5349	167.64	5.73438	1.43959	3.70453	.//_peak_740
chr9	1221445	1222986	1542	153.1	5.28333	1.43912	3.3085	.//_peak_1317
chr3	780480	781986	1507	296.76	10.3792	1.43902	9.3396	.//_peak_1838
chr14	1002711	1004456	1746	153.53	5.3114	1.43891	3.33566	.//_peak_361
chr4	942688	943271	584	290.7	10.6965	1.43883	9.65681	.//_peak_2104
chr10	1141575	1143098	1524	329.16	10.181	1.43878	9.12997	.//_peak_348
chr17	422830	424676	1847	161.69	5.47285	1.43831	3.46816	.//_peak_540
chr23	92574	92826	253	153.09	5.32118	1.43821	3.34839	.//_peak_765
chr7	303915	308596	4682	383.53	16.3502	1.43804	15.2634	.//_peak_2660
chr9	674166	676717	2552	393.1	12.7215	1.43786	11.6409	.//_peak_2964
chr23	237647	239049	1403	162.73	5.65022	1.4377	3.64591	.//_peak_790
chr7	506115	507287	1173	583.34	17.7955	1.43768	16.6481	.//_peak_2690
chr17	273668	275577	1910	214.44	7.21522	1.43764	5.02915	.//_peak_515
chr10	129991	130363	373	263.94	8.64121	1.43763	7.61587	.//_peak_209
chr18	351738	352091	354	238.86	7.76593	1.43754	6.75196	.//_peak_1239
chr2	361781	363932	2152	416.89	13.428	1.43747	12.341	.//_peak_1351
chr1	1328961	1331224	2264	364.76	11.0026	1.43738	9.94403	.//_peak_142
chr17	224999	226592	1594	192.29	6.41818	1.43728	4.2975	.//_peak_509
chr14	909611	909907	297	160.79	5.46343	1.437	3.46612	.//_peak_348
chr20	472033	473579	1547	514.93	16.9023	1.43693	15.7773	.//_peak_1578
chr24	154547	155098	552	416.95	13.9172	1.43681	12.8244	.//_peak_1696
chr3	912734	914574	1841	152.63	5.2857	1.43672	3.31773	.//_peak_835
chr18	489286	490345	1060	409.93	15.1023	1.43671	14.0163	.//_peak_1252
chr9	201618	201851	234	169.6	5.63499	1.4365	3.60474	.//_peak_1241
chr14	471736	478180	6445	153.31	5.47534	1.43637	3.51292	.//_peak_296
chr3	1068203	1071215	3013	163.29	5.71937	1.43622	3.72258	.//_peak_846
chr13	840256	840557	302	240.32	7.70444	1.43619	6.69016	.//_peak_747
chr8	618056	619912	1857	152.55	5.22032	1.43595	3.25502	.//_peak_1194
chr7	844366	844848	483	321.71	10.6498	1.43521	9.59824	.//_peak_2735
chr18	382039	385002	2964	152.85	5.37477	1.43515	3.41516	.//_peak_570
chr6	1065202	1065620	419	275.26	8.93618	1.43512	7.90642	.//_peak_2558
chr7	743097	744323	1227	152.44	5.21057	1.43487	3.24789	.//_peak_1160
chr2	651898	655927	4030	157.59	5.38353	1.43484	3.40209	.//_peak_602
chr7	447011	451356	4346	163.27	5.54109	1.43479	3.54231	.//_peak_1130
chr3	438976	441155	2180	152.43	5.1681	1.43477	3.20605	.//_peak_810
chr8	461769	463328	1560	287.84	9.17425	1.43441	8.13996	.//_peak_2812
chr8	751464	752354	891	329.74	10.4617	1.43402	9.40827	.//_peak_2847
chr20	212944	215739	2796	249.5	8.08198	1.43387	7.06478	.//_peak_1547
chr2	1456272	1456577	306	329.03	10.3956	1.43378	9.34279	.//_peak_1499
chr11	468830	469839	1010	153.29	5.30441	1.43371	3.34534	.//_peak_159
chr15	207133	207622	490	154.34	5.27522	1.43347	3.31332	.//_peak_389
chr4	832811	833435	625	152.28	5.11257	1.43345	3.15551	.//_peak_925
chr10	356745	358866	2122	152.65	5.22536	1.43296	3.2677	.//_peak_71
chr7	114307	114558	252	250.03	7.80767	1.43277	5.49019	.//_peak_1072
chr10	1150322	1152561	2240	304.44	10.4278	1.43256	9.38752	.//_peak_350
chr13	779027	782546	3520	298.5	9.6356	1.43227	8.59948	.//_peak_735
chr21	289602	290581	980	152.17	5.13753	1.43205	3.18349	.//_peak_709
chr18	665657	666166	510	382.1	11.9308	1.43197	10.857	.//_peak_1267
chr1	1782486	1787806	5321	200.86	6.69475	1.4319	4.57744	.//_peak_59
chr18	553518	554562	1045	736.37	21.4104	1.43175	20.238	.//_peak_1256
chr4	1102056	1102454	399	152.1	5.23652	1.43142	3.28354	.//_peak_936
chr2	692928	694648	1721	295.34	9.40442	1.43138	8.36943	.//_peak_1395
chr18	170608	173393	2786	162.55	5.47654	1.43133	3.48216	.//_peak_563
chr15	92353	93069	717	479.68	15.105	1.43128	14.0033	.//_peak_932
chr15	580126	581059	934	401.52	12.3681	1.43125	11.2907	.//_peak_989
chr21	417560	419845	2286	154.26	5.18842	1.43104	3.23205	.//_peak_722
chr21	360880	361597	718	152.01	5.28919	1.43092	3.33668	.//_peak_717
chr14	841496	842331	836	394.9	12.1416	1.4309	11.0656	.//_peak_889
chr9	488404	491131	2728	297.63	9.50624	1.43063	8.46974	.//_peak_2936
chr23	30628	33997	3370	153.61	5.2047	1.43058	3.2529	.//_peak_757
chr4	531278	534071	2794	154.38	5.26442	1.43054	3.30523	.//_peak_913
chr14	967337	969390	2054	379.96	12.6226	1.43045	11.5508	.//_peak_907
chr9	283380	285065	1686	165.94	5.56364	1.43036	3.56343	.//_peak_1244
chr11	1103916	1105013	1098	412.33	13.5887	1.43034	12.5113	.//_peak_504
chr15	442349	445984	3636	151.94	5.14476	1.43024	3.1954	.//_peak_417
chr17	102734	105107	2374	180.06	5.978	1.43014	3.92409	.//_peak_489
chr12	470184	471095	912	252.83	7.94418	1.43012	6.92768	.//_peak_561
chr11	688696	689381	686	174.98	5.96372	1.43008	3.92931	.//_peak_187
chr3	599221	600695	1475	151.92	5.12521	1.43005	3.17603	.//_peak_816
chr9	485852	486297	446	434.31	12.9901	1.42969	11.9054	.//_peak_2935
chr21	411614	411848	235	160.18	5.28022	1.42957	3.30604	.//_peak_721
chr1	1036138	1038760	2623	151.85	5.10943	1.42936	3.16228	.//_peak_20
chr16	500707	501135	429	257.45	8.42826	1.42927	7.40961	.//_peak_1079
chr23	162156	168832	6677	174.1	5.89736	1.42925	3.88479	.//_peak_777
chr2	57814	60401	2588	162.31	5.55777	1.42924	3.57673	.//_peak_590
chr7	698545	701015	2471	268.32	8.65028	1.42922	6.33702	.//_peak_1157
chr4	1454088	1455098	1011	151.79	5.17168	1.42882	3.22532	.//_peak_956
chr17	575411	575895	485	442.77	14.5845	1.42881	13.4872	.//_peak_1182
chr2	256706	257306	601	151.77	5.10428	1.42868	3.15887	.//_peak_594
chr12	635484	636878	1395	537.63	16.9967	1.42857	15.8757	.//_peak_587
chr6	1085089	1085393	305	284.86	8.96049	1.42828	7.92916	.//_peak_2561
chr16	168941	169592	652	290.66	9.08245	1.42827	8.04965	.//_peak_1043
chr20	173869	174294	426	202.58	6.3362	1.42824	4.20035	.//_peak_649
chr6	492752	493221	470	151.82	5.12199	1.42798	3.17825	.//_peak_1017
chr16	767001	768278	1278	291.98	9.36712	1.42783	8.33673	.//_peak_1108
chr17	397900	401139	3240	197.64	6.5507	1.42761	4.44945	.//_peak_536
chr15	288138	288982	845	182.88	6.0544	1.42756	3.99404	.//_peak_401
chr17	513029	514867	1839	151.65	5.08101	1.4275	3.1391	.//_peak_551
chr7	653844	654596	753	370.44	11.3262	1.4273	10.2614	.//_peak_2710
chr14	410630	410978	349	151.62	4.98119	1.42721	3.04217	.//_peak_291
chr27	100148	102140	1993	237.11	8.03641	1.42711	7.02847	.//_peak_1738
chr37	14075	19771	5697	266.51	8.58204	1.42709	6.27989	.//_peak_893
chr4	1125449	1125763	315	151.57	5.0356	1.42673	3.09609	.//_peak_940
chr17	282307	285012	2706	199.34	6.56539	1.42669	4.4569	.//_peak_517
chr7	52563	53068	506	252.03	8.35668	1.42666	7.3424	.//_peak_2619
chr7	268201	268987	787	155.58	5.17728	1.42557	3.22996	.//_peak_1099
chr14	640824	641636	813	156.51	5.08396	1.42542	3.13452	.//_peak_313
chr15	486016	489483	3468	171.16	6.18312	1.42536	4.17222	.//_peak_424
chr1	1121115	1121435	321	363.24	11.6916	1.42527	10.6304	.//_peak_114
chr14	304643	305229	587	151.39	5.04445	1.42513	3.10914	.//_peak_273
chr12	506191	507929	1739	340.57	11.9749	1.42493	10.9186	.//_peak_567
chr5	67900	68526	627	151.37	5.06714	1.42488	3.13165	.//_peak_968
chr13	911523	913571	2049	446.3	13.3778	1.42461	12.2873	.//_peak_756
chr17	91673	92075	403	187.86	5.93509	1.4246	3.86329	.//_peak_487
chr20	199091	201762	2672	213.39	6.63689	1.42447	4.47602	.//_peak_654
chr15	17592	18640	1049	566.38	17.8368	1.42391	16.7018	.//_peak_919
chr4	1121551	1122911	1361	153.62	5.32519	1.42385	3.39263	.//_peak_939
chr14	768719	773298	4580	152.44	5.00164	1.42379	3.06794	.//_peak_329
chr15	656286	658255	1970	430.64	13.0835	1.42371	11.9977	.//_peak_996
chr23	95205	98462	3258	152.31	5.12271	1.42359	3.19138	.//_peak_766
chr9	267481	269287	1807	152.37	5.03774	1.42346	3.10303	.//_peak_1243
chr17	293095	293620	526	182.78	5.8268	1.42333	3.77787	.//_peak_519
chr11	204175	206453	2279	157.27	5.13072	1.42313	3.18106	.//_peak_128
chr1	827829	828349	521	377.18	10.9034	1.42305	9.84294	.//_peak_71
chr3	745410	746795	1386	236.39	8.36699	1.42282	7.36138	.//_peak_1836
chr10	538936	539776	841	282.87	8.74447	1.42226	7.7176	.//_peak_265
chr15	180841	181384	544	490.4	15.2409	1.42207	14.1315	.//_peak_938
chr17	599585	600474	890	151.1	4.93377	1.42205	3.00795	.//_peak_554
chr2	568681	569672	992	281.54	8.912	1.42178	7.88465	.//_peak_1379
chr13	353199	353911	713	507.29	17.0334	1.42137	15.9197	.//_peak_679
chr8	590266	590565	300	151.07	4.94843	1.42128	3.02519	.//_peak_1190
chr9	1253255	1253517	263	151	4.89499	1.42124	2.97282	.//_peak_1320
chr15	741298	743509	2212	154.5	5.03023	1.4209	3.09867	.//_peak_442
chr14	111456	113077	1622	352.89	10.6725	1.4209	9.61973	.//_peak_795
chr20	119526	119893	368	271.16	8.21981	1.42083	7.1995	.//_peak_1533
chr15	842423	843900	1478	532.63	16.4593	1.42067	15.3386	.//_peak_1017
chr9	1031835	1032998	1164	156.13	5.11601	1.41999	3.17973	.//_peak_1294
chr5	1258288	1260156	1869	150.82	4.96826	1.41972	3.04858	.//_peak_1000
chr5	1275343	1275661	319	424.04	12.5	1.41928	11.4189	.//_peak_2374
chr13	318109	318645	537	284.32	8.41244	1.41925	7.38572	.//_peak_674
chr17	540882	541192	311	295.44	9.57332	1.41925	8.54241	.//_peak_1178
chr9	775896	778915	3020	344.38	11.2907	1.41864	10.2376	.//_peak_2974
chr18	200617	202851	2235	152.23	4.90874	1.41861	2.98928	.//_peak_565
chr14	810692	811505	814	150.69	4.9731	1.41852	3.05609	.//_peak_333
chr4	1451983	1452672	690	150.68	4.91985	1.41848	3.0038	.//_peak_955
chr15	191654	193885	2232	159.64	5.34366	1.41818	3.40123	.//_peak_387
chr15	449347	449753	407	374.89	11.8087	1.41816	10.7466	.//_peak_978
chr9	1176571	1181235	4665	153.97	5.20944	1.41812	3.29124	.//_peak_1312
chr8	921045	921318	274	235.73	7.03828	1.41766	4.81728	.//_peak_1215
chr21	271381	271819	439	165.42	5.22191	1.41741	3.25564	.//_peak_705
chr11	273222	274107	886	632.7	19.7244	1.4174	18.5693	.//_peak_396
chr11	452335	453149	815	356.8	10.6588	1.4173	9.6083	.//_peak_426
chr5	1102631	1104269	1639	284.52	9.1893	1.41719	8.16197	.//_peak_2355
chr18	415054	415729	676	235.45	7.36198	1.41717	6.35848	.//_peak_1247
chr13	156310	157288	979	235.45	7.69759	1.41712	6.69481	.//_peak_653
chr21	153405	153716	312	160.92	5.06281	1.41711	3.11671	.//_peak_686
chr15	134067	135026	960	152.27	5.03096	1.41702	3.11323	.//_peak_383
chr22	411278	411592	315	232.86	7.17246	1.41696	4.96929	.//_peak_744
chr16	320805	321353	549	391.77	11.4148	1.41693	10.3459	.//_peak_1064
chr3	1255717	1257987	2271	352.93	11.9362	1.41681	10.8788	.//_peak_1896
chr3	1378738	1379876	1139	157.23	5.00107	1.41674	3.06869	.//_peak_868
chr14	834066	837349	3284	156.04	5.08977	1.41638	3.16135	.//_peak_337
chr8	274872	276488	1617	249.3	7.92104	1.41605	6.91386	.//_peak_2794
chr7	287417	288271	855	150.98	4.87486	1.4157	2.96559	.//_peak_1104
chr21	185708	187159	1452	428.48	12.4719	1.41554	11.3916	.//_peak_1596
chr8	1025174	1026279	1106	153.58	4.9014	1.41547	2.98544	.//_peak_1226
chr18	287219	287857	639	316.15	9.58842	1.41527	8.55197	.//_peak_1230
chr23	104691	105153	463	163.68	5.20449	1.41526	3.24853	.//_peak_768
chr6	486752	488029	1278	321.67	9.83852	1.41519	8.79744	.//_peak_2468
chr24	302876	306463	3588	175	5.47818	1.41511	3.49124	.//_peak_792
chr6	1417856	1418924	1069	257.1	6.49195	1.41504	4.34221	.//_peak_1057
chr6	1435671	1435913	243	150.31	4.79061	1.41502	2.88577	.//_peak_1059
chr18	553623	554334	712	153.49	4.82964	1.41477	2.91643	.//_peak_579
chr2	351032	351593	562	325.97	9.45607	1.41468	8.41481	.//_peak_1349
chr14	911758	913862	2105	151.34	4.83054	1.4145	2.92445	.//_peak_349
chr8	1038272	1039712	1441	174.98	5.512	1.41432	3.51893	.//_peak_1228
chr14	916072	919137	3066	150.95	4.7943	1.41428	2.88961	.//_peak_350
chr6	743275	743661	387	582.09	16.5964	1.41396	15.4693	.//_peak_2510
chr8	832637	834934	2298	182.97	5.91638	1.41386	3.90498	.//_peak_1208
chr9	737500	741740	4241	150.14	4.81995	1.41336	2.91815	.//_peak_1254
chr5	1338418	1338786	369	258.56	7.56505	1.41332	6.55297	.//_peak_2383
chr20	432455	435661	3207	264.18	8.00516	1.41324	5.72756	.//_peak_677
chr9	1262607	1264017	1411	151.84	4.87408	1.41316	2.96835	.//_peak_1323
chr6	516914	517628	715	150.11	4.81941	1.41309	2.91796	.//_peak_1020
chr16	41008	42280	1273	297.72	9.97546	1.41302	8.94241	.//_peak_1033
chr23	103226	103616	391	155.35	4.90962	1.41294	2.9947	.//_peak_767
chr18	9731	11576	1846	1007.61	26.9929	1.41271	25.7484	.//_peak_1201
chr8	618538	620351	1814	237.23	7.64588	1.41209	6.64351	.//_peak_2831
chr2	1242391	1244290	1900	150.13	4.75783	1.41206	2.86059	.//_peak_620
chr9	206929	207907	979	149.98	4.74746	1.41189	2.85099	.//_peak_1242
chr1	1079176	1081554	2379	149.98	4.87153	1.41187	2.97415	.//_peak_23
chr20	119636	119893	258	199.98	6.00211	1.41179	3.9224	.//_peak_639
chr7	437375	438018	644	152.81	4.82826	1.41175	2.923	.//_peak_1128
chr12	789670	791819	2150	246.28	7.57604	1.4116	6.57342	.//_peak_600
chr15	107501	107739	239	149.92	4.7277	1.4113	2.83304	.//_peak_379
chr4	1571884	1573456	1573	248.96	7.93123	1.41093	6.92367	.//_peak_2198
chr2	824457	825719	1263	236.51	7.30218	1.41091	6.30131	.//_peak_1412
chr19	217645	217999	355	234.4	7.12684	1.41088	6.12635	.//_peak_1284
chr15	259980	262956	2977	165.65	5.36604	1.41077	3.41573	.//_peak_397
chr17	395195	396333	1139	284.38	8.67797	1.41066	6.33009	.//_peak_535
chr13	658466	658815	350	150.67	4.77116	1.41037	2.8758	.//_peak_246
chr21	351304	351707	404	149.81	4.71968	1.41033	2.82825	.//_peak_716
chr15	506056	506781	726	149.78	4.70859	1.41006	2.81745	.//_peak_427
chr11	103180	103665	486	150.43	4.75289	1.40988	2.85993	.//_peak_110
chr3	1466430	1466973	544	149.76	4.79359	1.40986	2.90074	.//_peak_879
chr8	280462	281679	1218	153.65	4.86267	1.40975	2.95995	.//_peak_1180
chr12	814555	816119	1565	149.74	4.77264	1.4097	2.88177	.//_peak_230
chr12	1031597	1036170	4574	149.7	4.80133	1.40923	2.91047	.//_peak_235
chr3	609738	611309	1572	155.33	4.86768	1.40912	2.96239	.//_peak_818
chr11	348925	350223	1299	427.71	12.9951	1.40911	11.9207	.//_peak_404
chr2	1301692	1302410	719	149.67	4.70014	1.409	2.81175	.//_peak_623
chr2	32226	32887	662	149.65	4.68668	1.40882	2.79928	.//_peak_589
chr11	752892	755217	2326	169.83	5.4034	1.4088	3.44533	.//_peak_196
chr17	55790	56158	369	396.88	11.2227	1.40873	10.1576	.//_peak_1124
chr6	1375210	1376701	1492	234.02	7.41546	1.40862	6.41664	.//_peak_2593
chr15	323404	323982	579	492.68	14.3022	1.4086	13.2021	.//_peak_960
chr3	1462221	1462464	244	157.37	4.87235	1.4085	2.96118	.//_peak_878
chr5	1037578	1038873	1296	167.32	5.18134	1.40841	3.23182	.//_peak_995
chr6	359567	362917	3351	425.01	13.7906	1.40831	12.7085	.//_peak_2448
chr18	355045	355420	376	289.33	8.79628	1.40807	7.77323	.//_peak_1240
chr15	505871	506928	1058	735.91	20.5687	1.40788	19.4073	.//_peak_983
chr20	234260	237088	2829	249.34	7.40842	1.40777	6.40493	.//_peak_1549
chr22	113246	114076	831	149.73	4.79824	1.40763	2.91107	.//_peak_728
chr15	447538	448296	759	158.94	4.95218	1.4076	3.03671	.//_peak_418
chr15	525915	528097	2183	149.53	4.75821	1.40733	2.87298	.//_peak_431
chr2	1055653	1057301	1649	149.6	4.6884	1.40733	2.80438	.//_peak_609
chr3	1339741	1340764	1024	156.38	4.81782	1.40733	2.91365	.//_peak_862
chr3	745349	746037	689	158.13	4.90327	1.40723	2.98777	.//_peak_828
chr4	749206	751869	2664	158.06	4.99318	1.40712	3.07953	.//_peak_923
chr20	422829	427225	4397	254.65	7.59428	1.40701	5.36261	.//_peak_675
chr15	633560	634146	587	242.81	7.06776	1.40698	6.06555	.//_peak_994
chr23	205923	209238	3316	394.12	11.7886	1.40675	10.7297	.//_peak_1677
chr12	23437	26977	3541	261.42	9.27611	1.40643	8.26738	.//_peak_512
chr17	151897	154062	2166	188.03	5.75745	1.40641	3.73952	.//_peak_497
chr2	1480137	1480593	457	149.37	4.61634	1.40616	2.73721	.//_peak_625
chr15	348694	349401	708	150.07	4.70675	1.40607	2.82486	.//_peak_408
chr14	339491	342268	2778	150.95	4.78307	1.40603	2.89706	.//_peak_279
chr4	1276358	1276959	602	149.35	4.66967	1.40596	2.78928	.//_peak_946
chr18	195258	197120	1863	343.61	9.79856	1.40583	8.75625	.//_peak_1219
chr2	846269	847072	804	493.23	13.7687	1.40568	12.674	.//_peak_1416
chr4	935237	935493	257	149.31	4.602	1.40566	2.72399	.//_peak_928
chr23	133253	139230	5978	178.92	5.38089	1.40556	3.40862	.//_peak_773
chr1	749176	750573	1398	515.95	11.894	1.40548	10.8291	.//_peak_62
chr14	511495	515084	3590	151.06	4.68162	1.40544	2.79828	.//_peak_302
chr14	283688	284227	540	149.29	4.59148	1.40542	2.71407	.//_peak_271
chr15	362569	363526	958	404.02	12.2322	1.40537	11.1712	.//_peak_970
chr7	735948	736230	283	149.27	4.65033	1.40524	2.77283	.//_peak_1159
chr6	669729	670048	320	248.26	7.20698	1.40524	6.20232	.//_peak_2500
chr4	205489	206085	597	335.21	9.27538	1.40519	8.23519	.//_peak_1998
chr5	116568	118154	1587	520.76	14.3081	1.4051	13.2127	.//_peak_2217
chr12	587508	588890	1383	167.41	5.22558	1.40491	3.28268	.//_peak_225
chr13	791004	792221	1218	483.51	13.3193	1.40489	12.2399	.//_peak_737
chr14	255941	256885	945	149.23	4.6657	1.40488	2.78841	.//_peak_267
chr3	630265	631603	1339	446.79	14.2889	1.40484	13.2049	.//_peak_1821
chr21	98539	101146	2608	350.38	10.1177	1.4047	9.07693	.//_peak_1584
chr6	996396	996741	346	319.65	9.22139	1.40467	8.18713	.//_peak_2546
chr15	47174	48591	1418	149.19	4.62692	1.40447	2.75133	.//_peak_375
chr17	30235	33370	3136	192.51	5.78128	1.40444	3.74982	.//_peak_484
chr9	53690	53936	247	149.18	4.56581	1.40442	2.69159	.//_peak_1232
chr10	329940	330277	338	278.3	8.34372	1.40442	7.32729	.//_peak_236
chr20	167794	168586	793	183.73	5.67516	1.40439	3.67731	.//_peak_647
chr11	485745	486055	311	149.17	4.628	1.40432	2.7526	.//_peak_162
chr17	488942	490050	1109	149.18	4.6862	1.40399	2.81065	.//_peak_547
chr9	876250	876827	578	149.13	4.65459	1.40392	2.77974	.//_peak_1267
chr14	663604	665216	1613	429.91	13.3126	1.40381	12.2364	.//_peak_866
chr14	928231	928682	452	150.86	4.6918	1.40375	2.81492	.//_peak_352
chr11	956855	957656	802	149.11	4.58493	1.40374	2.71154	.//_peak_208
chr1	467891	469006	1116	201.24	6.36192	1.40369	4.29751	.//_peak_8
chr9	1206583	1208482	1900	454.29	13.4597	1.40356	12.3756	.//_peak_3034
chr8	722445	725658	3214	149.05	4.6322	1.40322	2.75944	.//_peak_1200
chr14	547272	548354	1083	149.04	4.63074	1.40314	2.75923	.//_peak_304
chr2	359057	359426	370	233.07	6.70576	1.40291	5.70888	.//_peak_1350
chr7	469880	473345	3466	151.02	4.69212	1.40271	2.8169	.//_peak_1133
chr7	430894	434886	3993	158.5	4.86799	1.40269	2.96496	.//_peak_1127
chr35	13135	15804	2670	487.33	14.6278	1.40267	13.5331	.//_peak_1961
chr7	1079180	1079636	457	163.37	5.03049	1.40234	3.10759	.//_peak_1167
chr14	223219	229842	6624	151.6	4.68075	1.40233	2.8037	.//_peak_265
chr17	331562	334966	3405	165.97	5.03864	1.40224	3.10958	.//_peak_525
chr14	987334	988545	1212	150.73	4.67914	1.40218	2.80857	.//_peak_359
chr11	525880	527139	1260	150.13	4.64867	1.40212	2.77702	.//_peak_167
chr8	931738	938784	7047	255.27	7.41295	1.40174	5.1953	.//_peak_1216
chr4	717879	718732	854	273.03	8.11689	1.40143	7.10342	.//_peak_2070
chr3	537923	543030	5108	152.29	4.71406	1.4013	2.83705	.//_peak_813
chr9	1053465	1053788	324	149.15	4.54189	1.40125	2.67599	.//_peak_1296
chr18	573736	575566	1831	281.16	7.81781	1.40103	6.80723	.//_peak_1259
chr11	340536	344923	4388	149.72	4.61454	1.40101	2.74606	.//_peak_145
chr3	64781	66068	1288	148.8	4.63366	1.40087	2.76723	.//_peak_808
chr4	143681	144876	1196	362.96	10.1142	1.40081	9.06881	.//_peak_1988
chr4	373860	374471	612	355.43	10.0223	1.40069	8.97714	.//_peak_2022
chr8	371013	374043	3031	148.77	4.59795	1.40059	2.73289	.//_peak_1183
chr1	1706201	1706606	406	161.95	4.90405	1.4005	2.99351	.//_peak_45
chr6	785813	787246	1434	237.83	6.88591	1.40043	5.88791	.//_peak_2517
chr8	597579	599448	1870	148.75	4.59999	1.40036	2.73493	.//_peak_1192
chr5	570473	571123	651	500.62	13.3654	1.40023	12.2785	.//_peak_2271
chr11	487034	489415	2382	154.95	4.89723	1.40022	3.01359	.//_peak_163
chr15	410865	413411	2547	148.78	4.52644	1.39979	2.66428	.//_peak_413
chr21	312177	312881	705	317.72	8.4208	1.39968	7.39223	.//_peak_1608
chr20	481728	484720	2993	195.53	5.69829	1.39951	3.67123	.//_peak_682
chr9	972523	973444	922	151.19	4.58975	1.39897	2.72289	.//_peak_1283
chr11	44956	45223	268	152.02	4.55303	1.39873	2.68694	.//_peak_102
chr21	174901	175255	355	153.94	4.59085	1.39816	2.71944	.//_peak_688
chr14	889263	889941	679	153.65	4.6193	1.39814	2.74868	.//_peak_344
chr14	1018195	1020392	2198	150.7	4.60034	1.39806	2.73785	.//_peak_363
chr11	666554	667919	1366	168.5	5.02397	1.39788	3.09653	.//_peak_185
chr6	1259225	1259566	342	344.08	9.81142	1.39781	8.77097	.//_peak_2582
chr22	312995	315225	2231	164.68	4.93012	1.3977	3.01968	.//_peak_739
chr11	596767	597376	610	149.23	4.54304	1.39768	2.68533	.//_peak_177
chr2	266386	267793	1408	322.4	8.9545	1.39745	7.9232	.//_peak_1336
chr2	1279402	1279718	317	357.14	9.66337	1.39732	8.61909	.//_peak_1479
chr10	795772	796292	521	148.41	4.48816	1.39725	2.63374	.//_peak_88
chr18	499590	501032	1443	148.41	4.5108	1.3972	2.65519	.//_peak_576
chr11	243586	248862	5277	166.86	4.96229	1.3971	3.04422	.//_peak_133
chr35	22204	22785	582	148.76	4.6079	1.39708	2.7515	.//_peak_890
chr15	211481	213818	2338	148.4	4.67251	1.39682	2.81842	.//_peak_390
chr15	744529	748034	3506	148.54	4.53563	1.39678	2.68105	.//_peak_443
chr11	87644	88185	542	152.96	4.62301	1.39659	2.75787	.//_peak_108
chr13	393896	394377	482	413.49	11.4726	1.39653	10.4105	.//_peak_686
chr7	279677	281841	2165	148.55	4.55783	1.39635	2.7034	.//_peak_1102
chr14	791454	793006	1553	180.24	5.46515	1.3963	3.49788	.//_peak_331
chr27	42905	43863	959	231.94	6.69532	1.39616	5.70209	.//_peak_1736
chr12	283876	284211	336	271.1	7.65633	1.39573	6.64611	.//_peak_540
chr17	299516	301178	1663	444.65	12.628	1.39559	11.5529	.//_peak_1156
chr5	333657	334412	756	148.54	4.45325	1.39558	2.60268	.//_peak_979
chr14	558115	558447	333	148.21	4.45876	1.39532	2.60994	.//_peak_306
chr8	1076435	1076695	261	163.71	4.81202	1.39532	2.90801	.//_peak_1230
chr15	42140	42865	726	179.3	5.14115	1.39509	3.18876	.//_peak_374
chr6	56043	57356	1314	378.3	10.373	1.39503	9.33851	.//_peak_2414
chr14	178465	180697	2233	148.14	4.51812	1.3947	2.66904	.//_peak_259
chr16	684387	687394	3008	600.59	15.4837	1.3945	14.3793	.//_peak_1101
chr9	650207	652634	2428	148.12	4.50513	1.39446	2.65695	.//_peak_1252
chr4	15388	15657	270	148.11	4.42551	1.39437	2.57855	.//_peak_895
chr9	1058744	1060414	1671	152.47	4.63407	1.39417	2.77489	.//_peak_1297
chr25	19483	23872	4390	168.82	5.0383	1.39409	3.11635	.//_peak_797
chr16	43629	44728	1100	362.05	11.905	1.394	10.8598	.//_peak_1034
chr14	360888	361222	335	150.91	4.51382	1.39375	2.6624	.//_peak_282
chr6	706654	707053	400	148.03	4.48511	1.3937	2.63917	.//_peak_1023
chr8	348964	349368	405	324.68	8.81842	1.39337	7.78945	.//_peak_2802
chr11	630438	630808	371	345.36	9.74639	1.39321	8.70955	.//_peak_445
chr6	501675	502822	1148	147.98	4.47547	1.39317	2.63099	.//_peak_1018
chr9	1148017	1149238	1222	148.99	4.46545	1.39317	2.61956	.//_peak_1308
chr11	161072	161733	662	147.96	4.41365	1.39298	2.57039	.//_peak_119
chr17	24247	24799	553	178.02	5.15925	1.39267	3.20901	.//_peak_482
chr17	184701	185922	1222	416.73	10.611	1.39237	9.55712	.//_peak_1140
chr13	715787	716592	806	243.38	6.84586	1.392	5.8488	.//_peak_727
chr31	49156	49570	415	389.94	10.7394	1.39181	9.68416	.//_peak_1949
chr3	323332	324480	1149	366.38	9.82877	1.39173	8.78584	.//_peak_1792
chr15	504529	504960	432	150.61	4.42532	1.39159	2.58066	.//_peak_426
chr22	227054	229002	1949	240.32	6.69906	1.39152	4.56347	.//_peak_733
chr21	188283	190472	2190	160.52	4.82923	1.39137	2.9492	.//_peak_692
chr7	573321	574060	740	147.8	4.45264	1.39134	2.61369	.//_peak_1150
chr9	978744	980422	1679	154.72	4.57304	1.39095	2.71643	.//_peak_1285
chr21	136010	137291	1282	437.12	13.6715	1.39067	12.5966	.//_peak_1590
chr15	235634	235995	362	158.9	4.63223	1.39043	2.76123	.//_peak_393
chr29	35091	36323	1233	147.67	4.37923	1.39017	2.54422	.//_peak_802
chr11	820189	820488	300	147.64	4.3928	1.39005	2.55749	.//_peak_202
chr4	343714	343950	237	147.64	4.33913	1.38999	2.50539	.//_peak_908
chr9	1236194	1241205	5012	278.69	9.83983	1.3897	8.82406	.//_peak_3040
chr23	212848	216135	3288	150.66	4.441	1.38969	2.59718	.//_peak_787
chr15	152985	156378	3394	147.6	4.42971	1.38957	2.59578	.//_peak_385
chr17	25774	26036	263	174.24	5.03296	1.38956	3.10567	.//_peak_483
chr15	689255	692735	3481	152.28	4.52286	1.38946	2.67897	.//_peak_437
chr10	607150	607694	545	150	4.44941	1.38922	2.61065	.//_peak_79
chr6	291217	292115	899	276.43	7.33531	1.38902	6.332	.//_peak_2440
chr7	522936	524532	1597	368.65	9.73983	1.38892	8.69646	.//_peak_2693
chr13	604638	605362	725	147.52	4.37244	1.38889	2.54068	.//_peak_243
chr2	415228	415948	721	147.54	4.32611	1.38883	2.49554	.//_peak_597
chr15	192757	193912	1156	230.7	6.59112	1.38872	5.60184	.//_peak_940
chr5	355240	357171	1932	147.5	4.34562	1.38869	2.51523	.//_peak_982
chr17	378285	379825	1541	167.79	4.91615	1.38864	3.01455	.//_peak_533
chr6	1495380	1496371	992	243.68	6.85822	1.38862	4.7092	.//_peak_1067
chr11	483230	483720	491	148.68	4.38207	1.3885	2.55025	.//_peak_161
chr7	1098741	1099510	770	345.1	9.37114	1.38848	8.33637	.//_peak_2756
chr11	97856	101000	3145	147.6	4.38256	1.38844	2.55139	.//_peak_109
chr14	943542	943912	371	308.55	8.53898	1.38823	7.51716	.//_peak_904
chr11	678732	680274	1543	181.36	5.19477	1.38815	3.24657	.//_peak_186
chr7	667891	668178	288	147.44	4.33771	1.38814	2.50871	.//_peak_1153
chr8	972750	975439	2690	274.66	7.63594	1.38801	6.63491	.//_peak_2865
chr17	353570	354255	686	182.48	5.13274	1.38796	3.1835	.//_peak_529
chr9	1072084	1075980	3897	151.42	4.50116	1.38786	2.66064	.//_peak_1299
chr2	1418159	1419590	1432	249.54	6.95268	1.38785	5.95804	.//_peak_1494
chr9	898057	899577	1521	150.58	4.45393	1.38775	2.6186	.//_peak_1271
chr8	227485	227762	278	147.37	4.3106	1.38749	2.48384	.//_peak_1179
chr7	220771	222428	1658	190.15	5.43715	1.38695	3.46107	.//_peak_1092
chr21	200661	201017	357	160.62	4.62478	1.38683	2.75539	.//_peak_694
chr17	707548	708831	1284	159	4.71345	1.38677	2.843	.//_peak_556
chr3	365544	366066	523	345.41	9.01097	1.38646	7.97816	.//_peak_1794
chr6	462720	463180	461	233.96	6.51389	1.38645	5.52394	.//_peak_2463
chr15	467640	468491	852	151.08	4.39576	1.38639	2.56424	.//_peak_420
chr9	924872	925243	372	147.25	4.27367	1.38633	2.44988	.//_peak_1275
chr14	719203	720760	1558	172.96	5.07923	1.38618	3.1627	.//_peak_321
chr11	561340	561573	234	147.22	4.27629	1.38613	2.45335	.//_peak_173
chr9	863362	863624	263	147.2	4.24985	1.3859	2.42723	.//_peak_1265
chr7	560823	564071	3249	170.16	4.84954	1.38567	2.94926	.//_peak_1148
chr6	225209	226912	1704	250.64	6.89822	1.38565	5.90153	.//_peak_2434
chr7	215630	218412	2783	190.41	5.39881	1.38548	3.42665	.//_peak_1091
chr1	1722506	1723287	782	159.79	4.58686	1.38539	2.7254	.//_peak_48
chr9	886711	888202	1492	147.15	4.28334	1.38539	2.46248	.//_peak_1268
chr14	714597	714900	304	147.33	4.3396	1.38538	2.52173	.//_peak_319
chr11	477079	480431	3353	151.43	4.42764	1.38533	2.59184	.//_peak_160
chr11	515551	517121	1571	147.93	4.29733	1.38503	2.47471	.//_peak_166
chr6	437342	439363	2022	375.36	9.93444	1.38498	8.89818	.//_peak_2460
chr6	959187	960642	1456	147.1	4.25987	1.38497	2.44009	.//_peak_1034
chr15	780168	781789	1622	147.1	4.38375	1.38495	2.5617	.//_peak_448
chr13	1029458	1030277	820	334.48	8.75137	1.38489	7.72539	.//_peak_775
chr21	251254	253696	2443	167.48	4.78689	1.38487	2.90054	.//_peak_703
chr18	220258	221201	944	294.59	8.35443	1.3848	7.33932	.//_peak_1222
chr20	456688	459314	2627	187.9	5.36731	1.38447	3.40297	.//_peak_680
chr6	1459066	1460111	1046	147.33	4.28362	1.38443	2.46559	.//_peak_1061
chr1	1315427	1317801	2375	147.03	4.27562	1.38435	2.45703	.//_peak_28
chr3	928902	931123	2222	147.16	4.37807	1.3843	2.55797	.//_peak_837
chr8	596161	596437	277	147.7	4.27012	1.38422	2.45195	.//_peak_1191
chr15	274722	276470	1749	154.32	4.4228	1.38403	2.58349	.//_peak_398
chr37	4667	5623	957	261.37	6.96165	1.38402	4.76886	.//_peak_892
chr4	528368	529146	779	146.99	4.24214	1.38393	2.42509	.//_peak_912
chr6	1472459	1473496	1038	147.54	4.2998	1.3839	2.48115	.//_peak_1063
chr14	981150	982078	929	399.55	10.4813	1.38385	9.42879	.//_peak_909
chr21	335930	339910	3981	160.53	4.7072	1.38359	2.84127	.//_peak_714
chr7	200166	201019	854	222.21	6.16609	1.38344	4.09471	.//_peak_1088
chr23	200482	202701	2220	156.9	4.48232	1.38343	2.63732	.//_peak_785
chr9	1029985	1030895	911	147.15	4.27844	1.38323	2.46349	.//_peak_1293
chr23	227764	228111	348	158.69	4.46904	1.38308	2.61759	.//_peak_788
chr12	493668	495178	1511	230.09	6.46614	1.38303	5.47972	.//_peak_565
chr4	987310	988185	876	419.75	10.4869	1.38293	9.42909	.//_peak_2112
chr4	1302391	1303771	1381	147.52	4.2451	1.38279	2.42974	.//_peak_948
chr18	150711	153384	2674	233.46	7.15501	1.38266	6.16814	.//_peak_1213
chr7	240291	244228	3938	212.53	5.90358	1.38232	3.87768	.//_peak_1096
chr10	907198	909570	2373	147.08	4.2446	1.38224	2.43155	.//_peak_89
chr15	849520	849859	340	396.25	10.1037	1.38219	9.05474	.//_peak_1019
chr3	1093951	1094262	312	146.8	4.25019	1.38217	2.43795	.//_peak_847
chr14	779084	780533	1450	175.94	4.91619	1.38212	3.00442	.//_peak_330
chr4	545805	546474	670	146.79	4.2358	1.38207	2.42332	.//_peak_914
chr14	748978	749441	464	146.79	4.22094	1.38203	2.40922	.//_peak_325
chr3	628643	629046	404	184.51	5.05428	1.38197	3.11596	.//_peak_821
chr14	506816	510185	3370	372.81	9.5404	1.38189	8.50077	.//_peak_843
chr20	408289	412758	4470	249.62	6.88666	1.38186	4.75218	.//_peak_672
chr10	284250	284680	431	257.51	6.99215	1.38184	5.99408	.//_peak_230
chr20	284996	286056	1061	734.16	17.6025	1.38166	16.474	.//_peak_1553
chr7	490237	490736	500	146.74	4.2199	1.38162	2.40945	.//_peak_1139
chr13	922968	923455	488	515.86	12.5171	1.3816	11.4301	.//_peak_758
chr20	296271	299040	2770	199.37	5.44466	1.38119	3.4618	.//_peak_668
chr3	786314	789293	2980	146.74	4.22068	1.38108	2.41108	.//_peak_830
chr9	1061384	1063443	2060	150.66	4.40073	1.38099	2.58282	.//_peak_1298
chr11	742287	744441	2155	166.55	4.6676	1.38098	2.79195	.//_peak_194
chr1	1762429	1762978	550	669.95	15.7957	1.38083	14.6651	.//_peak_189
chr21	385508	385785	278	167.59	4.64959	1.38068	2.7729	.//_peak_719
chr9	855520	857987	2468	147.16	4.24524	1.38068	2.43583	.//_peak_1263
chr15	767473	767895	423	173.15	4.89699	1.38062	2.99613	.//_peak_446
chr11	1044775	1047110	2336	147.07	4.27739	1.3806	2.4673	.//_peak_211
chr10	196884	197606	723	148.26	4.19798	1.38017	2.38765	.//_peak_64
chr3	1246567	1248407	1841	146.59	4.24467	1.38016	2.43713	.//_peak_854
chr14	691417	693610	2194	479.3	13.8081	1.38006	12.7274	.//_peak_871
chr8	850502	851258	757	187.2	5.19502	1.38005	3.24776	.//_peak_1210
chr2	457580	458470	891	318.84	8.82633	1.37985	7.80553	.//_peak_1364
chr14	907913	908223	311	163.4	4.54021	1.37984	2.67937	.//_peak_347
chr3	516526	517309	784	150.97	4.30962	1.37984	2.49285	.//_peak_812
chr15	948177	949628	1452	146.7	4.17016	1.37955	2.36518	.//_peak_457
chr7	411786	412810	1025	152.36	4.30053	1.37951	2.48132	.//_peak_1125
chr3	166914	168207	1294	247.4	6.72615	1.37946	5.73258	.//_peak_1769
chr18	378741	380572	1832	162.76	4.61703	1.37941	2.76231	.//_peak_569
chr17	472033	472508	476	367.41	9.46481	1.37922	8.42771	.//_peak_1173
chr11	323943	327664	3722	149.22	4.28748	1.3792	2.47614	.//_peak_143
chr7	1048042	1048687	646	229.11	6.077	1.37917	5.09201	.//_peak_2752
chr4	1440383	1441722	1340	231.34	6.2332	1.37912	5.24798	.//_peak_2180
chr10	678361	679363	1003	146.46	4.1376	1.37898	2.33426	.//_peak_84
chr7	536969	537230	262	146.46	4.14802	1.37898	2.34504	.//_peak_1144
chr22	464991	465960	970	152.47	4.28504	1.37894	2.46234	.//_peak_749
chr3	618223	619817	1595	152.58	4.44978	1.37886	2.6209	.//_peak_819
chr11	123653	124649	997	148.3	4.20726	1.37884	2.40128	.//_peak_113
chr1	988097	988522	426	146.44	4.21764	1.37878	2.41443	.//_peak_18
chr17	139344	139952	609	175.06	4.84021	1.37867	2.94075	.//_peak_495
chr15	771935	772330	396	146.42	4.17878	1.37862	2.3765	.//_peak_447
chr6	370670	371707	1038	276.52	7.7246	1.37848	6.72207	.//_peak_2450
chr2	1119414	1119815	402	146.4	4.17965	1.37846	2.37796	.//_peak_615
chr2	1231856	1233299	1444	146.4	4.17169	1.37841	2.36972	.//_peak_619
chr14	247513	247993	481	146.39	4.1499	1.37834	2.34824	.//_peak_266
chr11	126169	126781	613	146.68	4.15796	1.37826	2.35623	.//_peak_114
chr14	519332	521752	2421	148.53	4.25535	1.37811	2.44843	.//_peak_303
chr9	529348	530446	1099	146.33	4.18515	1.37781	2.38517	.//_peak_1250
chr12	176545	178603	2059	390.91	9.86623	1.37773	8.83026	.//_peak_530
chr7	392202	392937	736	173.55	4.75414	1.3777	2.8623	.//_peak_1119
chr9	838070	838801	732	169.43	4.88192	1.37758	3.00299	.//_peak_1261
chr16	354421	355832	1412	320.05	8.17437	1.37745	7.16458	.//_peak_1067
chr18	371927	372159	233	146.59	4.16156	1.37727	2.36376	.//_peak_568
chr1	50461	52980	2520	159.33	4.50572	1.37713	2.67064	.//_peak_3
chr23	68310	69401	1092	162.78	4.49389	1.3771	2.64564	.//_peak_762
chr4	1282800	1283982	1183	146.23	4.18069	1.3768	2.38302	.//_peak_947
chr9	931589	932014	426	148.8	4.18	1.37674	2.37779	.//_peak_1276
chr23	47313	48047	735	309.65	8.62978	1.37656	7.61182	.//_peak_1655
chr12	1073637	1074231	595	146.17	4.10906	1.37631	2.31345	.//_peak_237
chr14	949169	949540	372	536.11	13.6527	1.37631	12.5605	.//_peak_905
chr17	120553	121031	479	173.28	4.85565	1.37615	2.96653	.//_peak_493
chr3	1337594	1337866	273	146.15	4.13882	1.3761	2.34388	.//_peak_861
chr21	276751	278675	1925	165.21	4.63008	1.37597	2.77313	.//_peak_706
chr6	1497420	1502453	5034	227.03	6.02651	1.37593	3.96677	.//_peak_1068
chr23	23001	25119	2119	147.21	4.23785	1.3759	2.4426	.//_peak_755
chr17	588377	589394	1018	294.89	7.26651	1.37587	6.26338	.//_peak_1183
chr20	138955	141233	2279	240.79	6.71593	1.37586	5.7291	.//_peak_1535
chr8	586296	587305	1010	146.13	4.10516	1.37585	2.3108	.//_peak_1188
chr9	1116820	1119530	2711	146.32	4.15343	1.37578	2.35849	.//_peak_1305
chr14	732010	733772	1763	180.18	4.98624	1.3756	3.07726	.//_peak_322
chr23	11220	13559	2340	150.97	4.22887	1.37547	2.42312	.//_peak_753
chr9	1112417	1113416	1000	146.08	4.13583	1.37546	2.34226	.//_peak_1304
chr6	1092460	1093136	677	359.08	9.7082	1.37542	8.67455	.//_peak_2563
chr17	574010	574245	236	146.08	4.09849	1.37539	2.30544	.//_peak_552
plasmid	14254	20931	6678	28204	714.157	1.37539	711.666	.//_peak_3049
chr12	941926	943444	1519	146.15	4.12748	1.3753	2.33416	.//_peak_231
chr12	1155595	1156006	412	146.05	4.10148	1.37518	2.30906	.//_peak_238
chr8	107346	107584	239	146.05	4.05572	1.37511	2.26315	.//_peak_1175
chr7	692550	696951	4402	231.24	6.1066	1.37503	4.067	.//_peak_1156
chr1	1592593	1594049	1457	146.86	4.11673	1.37493	2.32319	.//_peak_35
chr2	341489	343769	2281	160.89	4.55759	1.37493	2.71161	.//_peak_596
chr13	686657	687907	1251	288.18	8.76907	1.37488	7.7596	.//_peak_723
chr6	1375257	1376975	1719	146.01	4.11791	1.37474	2.32622	.//_peak_1055
chr9	1167965	1168577	613	149.65	4.18977	1.37472	2.39319	.//_peak_1311
chr20	276690	278347	1658	177.84	4.87014	1.37463	2.97129	.//_peak_665
chr11	420293	421443	1151	152.15	4.26234	1.3746	2.45278	.//_peak_154
chr19	453413	454143	731	237.61	6.18565	1.37454	5.1989	.//_peak_1300
chr7	418237	419464	1228	398.17	10.2501	1.37447	9.20262	.//_peak_2677
chr7	54572	54900	329	294.27	7.54988	1.37409	6.54129	.//_peak_2620
chr20	170115	170475	361	177.89	4.76939	1.37387	2.87289	.//_peak_648
chr4	113416	114544	1129	214.21	5.69639	1.37374	3.68119	.//_peak_905
chr5	1252253	1252875	623	148.86	4.16926	1.37368	2.37376	.//_peak_999
chr20	165612	166053	442	185.19	4.97151	1.37364	3.05025	.//_peak_646
chr9	163496	164675	1180	146.14	4.22134	1.37363	2.43098	.//_peak_1239
chr11	459925	465016	5092	146.9	4.12576	1.37349	2.3351	.//_peak_158
chr5	86811	89340	2530	225.92	5.8516	1.37319	3.79991	.//_peak_970
chr7	373624	377149	3526	153.49	4.2514	1.37314	2.44196	.//_peak_1117
chr23	63065	63450	386	175.5	4.67361	1.37312	2.78858	.//_peak_761
chr11	767276	767629	354	481.31	12.6712	1.37268	11.598	.//_peak_463
chr14	559894	561256	1363	149.35	4.15455	1.37262	2.36434	.//_peak_307
chr14	405113	405711	599	145.77	4.03867	1.3725	2.25386	.//_peak_290
chr18	570530	571336	807	145.76	4.0997	1.37247	2.3144	.//_peak_580
chr16	880348	884680	4333	369.56	9.67774	1.37226	8.64804	.//_peak_1115
chr9	871286	872342	1057	509.89	13.7631	1.37201	12.6796	.//_peak_2987
chr15	427557	428405	849	146.11	4.11864	1.37195	2.33361	.//_peak_415
chr3	1161664	1161994	331	145.87	4.05711	1.37159	2.27457	.//_peak_852
chr14	946004	947487	1484	172.09	4.67651	1.37142	2.80504	.//_peak_355
chr16	101082	101576	495	485.28	12.0321	1.37124	10.9583	.//_peak_1038
chr3	909015	909751	737	559.56	13.4483	1.37108	12.3605	.//_peak_1847
chr22	386740	388953	2214	274.28	6.77937	1.37103	4.59231	.//_peak_741
chr6	732614	732956	343	145.6	3.99087	1.37092	2.21011	.//_peak_1024
chr9	1078419	1078852	434	145.59	4.02408	1.37087	2.24347	.//_peak_1300
chr13	437299	438405	1107	145.56	4.04512	1.37058	2.26553	.//_peak_241
chr7	314980	318954	3975	148.74	4.23585	1.37047	2.44739	.//_peak_1107
chr23	86437	88020	1584	167.65	4.64424	1.37022	2.79153	.//_peak_764
chr4	900267	900684	418	388.31	9.75553	1.37009	8.71433	.//_peak_2098
chr14	857862	861252	3391	469.94	11.4296	1.37	10.3653	.//_peak_891
chr13	996926	998686	1761	145.5	4.06178	1.36998	2.28316	.//_peak_255
chr17	212141	212615	475	190.11	5.01618	1.36977	3.08919	.//_peak_506
chr17	146112	150939	4828	171.84	4.61849	1.36971	2.75492	.//_peak_496
chr7	504254	504881	628	293.94	7.38949	1.36967	6.38323	.//_peak_2689
chr9	1153926	1154795	870	145.45	4.02987	1.36957	2.2532	.//_peak_1309
chr14	223861	228762	4902	232.48	6.07314	1.3695	5.09113	.//_peak_811
chr15	810051	811457	1407	145.44	4.03302	1.36949	2.2564	.//_peak_449
chr14	818367	818695	329	145.44	3.99135	1.36946	2.21474	.//_peak_335
chr6	1464478	1467055	2578	145.55	4.04224	1.3692	2.26627	.//_peak_1062
chr4	1098179	1099860	1682	145.41	4.00219	1.36913	2.22677	.//_peak_935
chr9	939737	941648	1912	145.4	4.02538	1.36905	2.25004	.//_peak_1278
chr6	929869	932459	2591	145.4	4.09383	1.36896	2.31761	.//_peak_1029
chr13	897734	899846	2113	315.43	8.39924	1.36896	7.38353	.//_peak_754
chr5	1301278	1301786	509	270.57	6.74182	1.36885	5.74774	.//_peak_2378
chr9	387023	388090	1068	145.38	4.00479	1.36883	2.23025	.//_peak_1247
chr1	999565	1000650	1086	273.3	7.30785	1.36881	6.31006	.//_peak_98
chr15	296175	298996	2822	158.51	4.29088	1.36879	2.47591	.//_peak_404
chr3	1483689	1485130	1442	146.51	4.12043	1.3687	2.342	.//_peak_882
chr35	23886	25112	1227	227.35	6.06452	1.36866	5.08522	.//_peak_1962
chr12	391273	391799	527	346.6	9.18569	1.36854	8.16095	.//_peak_554
chr5	402564	404035	1472	145.38	4.04289	1.3684	2.26882	.//_peak_984
chr11	1106723	1107136	414	179.16	4.7297	1.36819	2.84646	.//_peak_214
chr15	520367	521713	1347	145.61	4.02169	1.36816	2.24807	.//_peak_430
chr24	214883	215735	853	145.29	4.02709	1.36807	2.2539	.//_peak_791
chr17	276519	277080	562	180.73	4.76286	1.36804	2.87211	.//_peak_516
chr5	25420	26136	717	221.73	5.64463	1.36802	3.62101	.//_peak_965
chr11	538885	539213	329	145.28	3.96735	1.36791	2.19534	.//_peak_169
chr20	464842	466284	1443	164.87	4.41331	1.3679	2.57787	.//_peak_681
chr11	691481	691714	234	161.85	4.32519	1.36781	2.5001	.//_peak_188
chr7	688236	689019	784	155.05	4.19805	1.36753	2.40053	.//_peak_1155
chr5	270774	271141	368	284.23	7.13792	1.36738	6.1364	.//_peak_2234
chr11	360718	361054	337	158.56	4.28113	1.36736	2.46692	.//_peak_147
chr1	895061	895321	261	145.21	3.98135	1.36729	2.2112	.//_peak_16
chr11	1072908	1073632	725	145.21	3.96387	1.36728	2.19362	.//_peak_212
chr15	674641	675910	1270	146.88	4.03245	1.36719	2.25787	.//_peak_436
chr3	1457617	1460424	2808	145.2	3.99094	1.36718	2.22053	.//_peak_877
chr13	829678	831881	2204	145.37	3.99164	1.36701	2.22197	.//_peak_252
chr14	600675	602158	1484	145.17	4.02929	1.36688	2.259	.//_peak_308
chr1	636506	637171	666	145.14	3.94596	1.3666	2.17747	.//_peak_10
chr14	262443	264051	1609	145.76	4.01784	1.36642	2.24852	.//_peak_269
chr5	1149961	1151314	1354	145.23	3.95549	1.36636	2.18783	.//_peak_997
chr7	225886	226238	353	194.37	5.00877	1.36633	3.07846	.//_peak_1093
chr4	1388848	1389253	406	235.42	5.95352	1.36618	4.97181	.//_peak_2173
chr3	1275170	1276371	1202	145.05	3.93615	1.36578	2.17037	.//_peak_857
chr5	346444	348128	1685	145.05	3.97045	1.36576	2.20445	.//_peak_981
chr13	349966	350552	587	308.08	7.86975	1.36574	6.8625	.//_peak_678
chr14	258834	260587	1754	145.19	3.94193	1.36561	2.17623	.//_peak_268
chr9	934046	935361	1316	145.03	3.94614	1.36559	2.18064	.//_peak_1277
chr15	476897	477600	704	145.43	3.93742	1.36542	2.17213	.//_peak_422
chr20	138694	141212	2519	187.86	4.99499	1.36532	3.08975	.//_peak_642
chr8	500549	503633	3085	144.99	3.94577	1.36525	2.18124	.//_peak_1186
chr5	1370600	1371283	684	255.76	6.40536	1.36515	5.41976	.//_peak_2389
chr9	514589	514827	239	144.97	3.92031	1.36504	2.15639	.//_peak_1249
chr11	662566	664939	2374	532.76	13.5875	1.36498	12.5061	.//_peak_451
chr21	341024	343505	2482	154.69	4.26973	1.36497	2.47611	.//_peak_715
chr31	39975	41740	1766	144.96	3.93602	1.36497	2.1725	.//_peak_888
chr5	1261666	1264478	2813	145.83	3.98952	1.36469	2.22445	.//_peak_1001
chr15	31491	35322	3832	158.22	4.31038	1.36467	2.50516	.//_peak_373
chr7	724661	725242	582	144.92	3.91767	1.36458	2.15527	.//_peak_1158
chr15	27987	30375	2389	150.03	4.04001	1.36447	2.26479	.//_peak_372
chr1	1733366	1734371	1006	154.05	4.14309	1.36437	2.35328	.//_peak_52
chr22	260425	261310	886	154.32	4.13077	1.36434	2.33976	.//_peak_736
chr8	740649	740939	291	144.89	3.91514	1.36426	2.15329	.//_peak_1202
chr3	1374285	1376356	2072	155.28	4.16883	1.3642	2.37588	.//_peak_867
chr8	630151	630407	257	167.76	4.42921	1.36408	2.59198	.//_peak_1197
chr23	36914	37288	375	144.86	3.89364	1.36403	2.13249	.//_peak_758
chr11	165970	169063	3094	154.06	4.13477	1.36396	2.34631	.//_peak_120
chr10	442179	443347	1169	285.35	7.05423	1.36394	6.05423	.//_peak_253
chr14	922808	923699	892	154.47	4.14145	1.36385	2.35383	.//_peak_351
chr13	313869	314568	700	144.84	3.94166	1.36379	2.18143	.//_peak_240
chr10	1100422	1101744	1323	144.83	3.92621	1.36371	2.16609	.//_peak_95
chr7	1232690	1233805	1116	295.91	7.54272	1.36369	6.54207	.//_peak_2769
chr21	183188	184917	1730	155.03	4.17314	1.36365	2.3823	.//_peak_691
chr3	1372200	1373037	838	169.79	4.52538	1.36365	2.67995	.//_peak_866
chr3	1320687	1321323	637	144.8	3.91566	1.36345	2.15643	.//_peak_860
chr17	613557	614400	844	145.93	3.95154	1.3634	2.19105	.//_peak_555
chr16	592487	593000	514	144.79	3.89756	1.36337	2.13827	.//_peak_476
chr4	1272115	1273843	1729	144.79	3.97667	1.36336	2.21669	.//_peak_945
chr21	448446	449577	1132	145.18	3.94224	1.36333	2.187	.//_peak_724
chr1	773832	774996	1165	146.85	3.96736	1.36332	2.20209	.//_peak_13
chr5	307560	307857	298	144.82	3.90294	1.36329	2.14415	.//_peak_978
chr14	550143	550638	496	144.77	3.88894	1.3632	2.13	.//_peak_305
chr9	634993	637393	2401	144.96	3.90745	1.3632	2.14853	.//_peak_1251
chr35	17569	19210	1642	144.77	3.90127	1.36313	2.14294	.//_peak_889
chr7	155716	160229	4514	212.08	5.5705	1.36308	3.60463	.//_peak_1081
chr3	1252385	1252874	490	144.75	3.91442	1.36302	2.15623	.//_peak_856
chr23	129233	132267	3035	157.52	4.19627	1.36274	2.40309	.//_peak_772
chr4	841300	841782	483	270.88	6.47517	1.36271	5.48063	.//_peak_2090
chr9	1024890	1027248	2359	147.2	3.96376	1.3627	2.20007	.//_peak_1292
chr4	1048348	1049816	1469	144.7	3.9091	1.36253	2.15236	.//_peak_932
chr20	91687	92463	777	196.38	5.00693	1.36209	3.08115	.//_peak_634
chr12	1026599	1027890	1292	144.97	3.90557	1.36205	2.14963	.//_peak_234
chr3	1250448	1251340	893	144.65	3.89617	1.36204	2.14045	.//_peak_855
chr12	73948	74721	774	144.63	3.93692	1.36184	2.18144	.//_peak_216
chr14	21299	21619	321	144.62	3.86416	1.36174	2.10957	.//_peak_256
chr7	131461	133204	1744	201.1	5.04281	1.36172	3.1041	.//_peak_1074
chr11	84254	84722	469	147.96	3.93029	1.36146	2.16983	.//_peak_107
chr23	117289	120597	3309	154.97	4.07648	1.36118	2.29224	.//_peak_770
chr11	798928	799240	313	527.98	12.3187	1.36109	11.2405	.//_peak_467
chr9	1123908	1124398	491	144.53	3.88549	1.36093	2.13345	.//_peak_1306
chr7	140923	141226	304	220.67	5.38165	1.36088	3.38644	.//_peak_1076
chr11	695945	697904	1960	652.77	15.5437	1.36077	14.4393	.//_peak_457
chr1	1672912	1679411	6500	189.99	4.95715	1.36065	3.06419	.//_peak_42
chr17	506839	508782	1944	146.2	3.99324	1.36065	2.23563	.//_peak_549
chr17	783316	785447	2132	189.51	5.28444	1.36058	3.39694	.//_peak_558
[truncated: 1,052 more rows]

## Sheet: Trial 3
Table S6. ChIP-seq for E. histolytica expressing HA-KERP2
Trial 3
chr	start	end	length	pileup	-LOG10(pvalue)	fold_enrichment	-LOG10(qvalue)	name
chr4	1506171	1507611	1441	251.69	16.922	1.75222	14.2039	.//_peak_1380
chr9	894566	896883	2318	250.04	13.7156	1.61613	11.3191	.//_peak_1793
chr5	343801	344303	503	229.22	11.8259	1.59807	9.50498	.//_peak_1408
chr21	294370	296746	2377	226.27	10.7597	1.57868	8.48049	.//_peak_1010
chr8	632444	632871	428	294.19	13.5978	1.56988	11.1182	.//_peak_1693
chr14	500347	500822	476	223.74	10.6672	1.56257	8.45343	.//_peak_449
chr2	1152271	1153493	1223	223.21	9.95792	1.55558	7.74707	.//_peak_909
chr15	121386	125481	4096	231.76	10.2484	1.53844	8.05765	.//_peak_558
chr4	1027638	1028161	524	220.02	9.97687	1.53654	7.83336	.//_peak_1340
chr11	878500	879370	871	232.44	9.84636	1.53119	7.66151	.//_peak_301
chr16	295650	296039	390	218.07	9.08734	1.52372	6.9703	.//_peak_680
chr19	178150	179337	1188	263.49	10.8895	1.51967	8.62794	.//_peak_844
chr11	103220	103841	622	223.21	9.43894	1.51825	7.33633	.//_peak_170
chr4	152216	152495	280	234.21	9.66266	1.51702	7.49659	.//_peak_1297
chr4	720455	721426	972	214.67	8.56576	1.49956	6.52765	.//_peak_1327
chr4	1512318	1512893	576	213.46	8.1753	1.49164	6.15935	.//_peak_1381
chr20	162012	164498	2487	295.01	11.7433	1.49129	9.51557	.//_peak_940
chr9	924822	925324	503	213.41	8.16537	1.49102	6.15177	.//_peak_1802
chr11	226988	229339	2352	223.1	8.86216	1.49086	6.83791	.//_peak_196
chr17	781566	782129	564	547.8	20.9503	1.48713	18.2545	.//_peak_801
chr4	605371	607787	2417	228.82	10.1636	1.48578	8.14532	.//_peak_1319
chr5	448539	449261	723	213.05	8.3662	1.48544	6.36834	.//_peak_1416
chr14	247444	248022	579	213.66	8.06026	1.48522	6.06245	.//_peak_411
chr11	562695	572564	9870	215.99	8.39412	1.48427	6.40276	.//_peak_254
chr21	153324	153857	534	217.05	8.4714	1.48386	6.46842	.//_peak_982
chr5	1168159	1169920	1762	253.05	10.9048	1.4837	8.8076	.//_peak_1440
chr11	165983	168426	2444	212.87	7.91372	1.47922	5.93541	.//_peak_182
chr7	565803	567590	1788	238.56	9.28149	1.47875	7.24648	.//_peak_1619
chr17	115610	116316	707	249.88	9.41644	1.47721	7.31089	.//_peak_728
chr5	1578642	1578902	261	221.16	8.12287	1.47627	6.11884	.//_peak_1463
chr9	803500	804980	1481	216.32	7.78666	1.47319	5.81535	.//_peak_1780
chr10	215151	215403	253	236.64	8.67309	1.47293	6.63338	.//_peak_98
chr1	1726946	1728430	1485	237.39	9.28452	1.4725	7.26864	.//_peak_76
chr5	455243	456259	1017	214.68	7.87553	1.47227	5.90816	.//_peak_1418
chr18	553563	554391	829	210.73	7.87271	1.47109	5.92231	.//_peak_837
chr6	17910	19621	1712	244.06	9.14095	1.47076	7.09262	.//_peak_1466
chr9	443898	445095	1198	209.61	7.60329	1.46488	5.67252	.//_peak_1759
chr21	176651	179684	3034	233.36	8.87283	1.46283	6.88208	.//_peak_987
chr20	271241	272430	1190	245.76	8.77334	1.46134	6.73318	.//_peak_957
chr8	931355	940174	8820	352.92	12.2477	1.45954	9.92754	.//_peak_1721
chr17	347052	347632	581	276.31	9.44028	1.45789	7.3103	.//_peak_769
chr8	1034475	1035183	709	214.71	8.15297	1.45699	6.22396	.//_peak_1730
chr4	815719	816171	453	209.62	7.55138	1.45689	5.6352	.//_peak_1330
chr3	1342131	1344678	2548	224.89	7.85922	1.45601	5.90091	.//_peak_1226
chr11	420077	421560	1484	208.23	7.22899	1.45324	5.33438	.//_peak_230
chr11	805440	807660	2221	219.29	7.62064	1.4526	5.69845	.//_peak_294
chr16	592512	593177	666	207.77	7.14951	1.45211	5.25864	.//_peak_697
chr9	863197	863597	401	224.87	7.69645	1.45137	5.75509	.//_peak_1788
chr4	48537	48927	391	220.78	7.85901	1.4505	5.92085	.//_peak_1280
chr6	492776	493448	673	211.37	7.45256	1.44645	5.55406	.//_peak_1480
chr9	53676	54026	351	206.96	7.09962	1.44645	5.22353	.//_peak_1737
chr8	288189	289586	1398	298.1	10.5953	1.44644	8.46995	.//_peak_1669
chr18	504127	505630	1504	233.66	8.00116	1.44554	6.03234	.//_peak_835
chr8	610877	611499	623	206.71	7.18061	1.44468	5.30787	.//_peak_1687
chr11	186980	188102	1123	208.7	6.95878	1.44456	5.08943	.//_peak_187
chr24	247859	248272	414	212.94	7.20697	1.44455	5.31728	.//_peak_1092
chr14	820614	828039	7426	209.43	7.17746	1.44415	5.30339	.//_peak_507
chr14	922791	923829	1039	211.96	7.67173	1.44321	5.78367	.//_peak_519
chr7	240326	244309	3984	292.48	9.97931	1.44228	7.90018	.//_peak_1570
chr21	417398	420065	2668	226.28	7.52742	1.44193	5.61215	.//_peak_1031
chr17	730165	730583	419	253.75	8.54484	1.44089	6.5269	.//_peak_799
chr11	540204	541690	1487	208.05	6.96855	1.439	5.11267	.//_peak_249
chr21	236323	239559	3237	227.62	7.73346	1.43721	5.83803	.//_peak_999
chr1	1365363	1366015	653	205.88	6.6848	1.43687	4.8436	.//_peak_46
chr14	790719	792831	2113	247.11	8.46387	1.4365	6.48807	.//_peak_501
chr14	640796	642247	1452	210.68	7.04427	1.43507	5.18428	.//_peak_473
chr11	410086	410480	395	205.37	6.66715	1.43479	4.83265	.//_peak_227
chr11	87591	88186	596	210.89	6.89526	1.43397	5.04471	.//_peak_168
chr4	1457591	1457905	315	207.38	6.84791	1.43259	5.00759	.//_peak_1378
chr18	282317	283388	1072	231.49	7.58184	1.43238	5.68572	.//_peak_820
chr8	617751	621189	3439	204.89	6.7903	1.4315	4.96158	.//_peak_1690
chr15	410911	413757	2847	206.95	6.75346	1.43135	4.92163	.//_peak_610
chr3	644895	646701	1807	229.59	7.79891	1.4296	5.89989	.//_peak_1156
chr15	467592	468572	981	205.03	6.49113	1.42954	4.67412	.//_peak_619
chr7	692321	701267	8947	311.4	9.51447	1.42855	7.41098	.//_peak_1630
chr19	259870	261278	1409	243.55	8.09898	1.42831	6.18075	.//_peak_846
chr11	105462	107941	2480	204.86	6.80531	1.42803	4.98313	.//_peak_171
chr7	485877	486635	759	204.16	6.80521	1.42694	4.98783	.//_peak_1604
chr4	528218	529202	985	204.49	6.70341	1.42495	4.8972	.//_peak_1312
chr3	1406812	1411339	4528	208.75	7.11418	1.42391	5.29898	.//_peak_1238
chr11	508133	511752	3620	203.8	6.9933	1.42328	5.19199	.//_peak_242
chr8	1076410	1076840	431	227.76	7.48853	1.42324	5.60167	.//_peak_1734
chr17	109862	114468	4607	240.55	7.73354	1.42253	5.82116	.//_peak_727
chr15	211596	213370	1775	203.57	6.60655	1.42151	4.80495	.//_peak_571
chr11	646408	647020	613	206.9	6.63108	1.42143	4.82496	.//_peak_268
chr9	200226	203495	3270	204.35	7.17022	1.42137	5.37301	.//_peak_1748
chr4	93717	94390	674	315.8	10.0518	1.42114	7.94412	.//_peak_1289
chr22	256285	262221	5937	230.37	7.24448	1.42086	5.37283	.//_peak_1043
chr23	125707	145021	19315	227.88	7.18145	1.42062	5.31642	.//_peak_1080
chr15	207017	207694	678	210.04	6.65093	1.41913	4.83851	.//_peak_570
chr20	126770	129189	2420	290.74	9.14599	1.41906	7.08719	.//_peak_935
chr17	394738	401256	6519	270.22	8.36984	1.41889	6.38499	.//_peak_778
chr14	444038	449034	4997	216.09	7.26213	1.4187	5.43903	.//_peak_440
chr10	196058	197905	1848	202.98	6.57777	1.41867	4.78266	.//_peak_97
chr17	501820	502926	1107	318.29	11.0642	1.41856	8.94056	.//_peak_790
chr3	64433	66162	1730	203.07	6.54008	1.41762	4.74987	.//_peak_1123
chr11	47011	50102	3092	209.1	6.67668	1.41743	4.867	.//_peak_161
chr3	745171	746860	1690	205.99	6.53963	1.41722	4.74157	.//_peak_1165
chr18	706512	707204	693	202.5	6.21149	1.41545	4.43551	.//_peak_842
chr7	268154	270278	2125	204.49	6.45867	1.41538	4.6761	.//_peak_1574
chr12	820003	820340	338	202.36	6.37343	1.41428	4.59458	.//_peak_341
chr11	350282	351905	1624	202.72	6.2757	1.41407	4.50017	.//_peak_217
chr7	534238	535665	1428	255.79	8.00961	1.41371	6.0655	.//_peak_1612
chr7	767728	773049	5322	244.92	7.63229	1.4131	5.74031	.//_peak_1638
chr15	42202	43127	926	261.35	8.64268	1.41221	6.69583	.//_peak_546
chr5	346327	348039	1713	201.96	6.27537	1.41166	4.50723	.//_peak_1409
chr16	801043	801294	252	205.9	6.23173	1.41137	4.45721	.//_peak_711
chr17	262232	262743	512	247.92	7.28843	1.41088	5.38499	.//_peak_756
chr2	1104232	1105287	1056	201.84	6.16322	1.41086	4.39885	.//_peak_905
chr18	382169	385599	3431	204.21	6.63619	1.4103	4.87635	.//_peak_825
chr9	953732	954820	1089	204.95	6.51671	1.40966	4.74582	.//_peak_1807
chr16	281280	282348	1069	204.32	6.35182	1.40914	4.58215	.//_peak_678
chr19	229955	232952	2998	221.04	6.87387	1.40841	5.05528	.//_peak_845
chr9	736790	741939	5150	202.78	6.1668	1.40778	4.41043	.//_peak_1774
chr3	1465671	1467153	1483	201.9	6.05774	1.40753	4.30488	.//_peak_1247
chr16	289498	289791	294	201.35	6.04798	1.40741	4.29603	.//_peak_679
chr14	473925	477382	3458	220.26	6.72907	1.40709	4.91603	.//_peak_444
chr17	359712	361843	2132	241.45	7.1463	1.40648	5.27534	.//_peak_773
chr18	466282	468823	2542	252.29	7.33156	1.4061	5.43033	.//_peak_830
chr14	833517	837410	3894	217.62	6.75977	1.40605	4.9655	.//_peak_509
chr1	808437	809662	1226	201.1	6.11155	1.40566	4.36115	.//_peak_20
chr18	168902	169234	333	201.05	5.89187	1.40531	4.15116	.//_peak_813
chr1	1764770	1769461	4692	216.04	6.47164	1.4053	4.68134	.//_peak_83
chr11	17207	20081	2875	215.45	6.51852	1.40521	4.7305	.//_peak_156
chr14	123780	127578	3799	234.56	7.05926	1.40517	5.21396	.//_peak_395
chr9	1176535	1181224	4690	203.78	6.22841	1.40423	4.4817	.//_peak_1838
chr13	437473	438543	1071	200.82	6.04745	1.40378	4.303	.//_peak_361
chr15	520028	521800	1773	200.86	6.03878	1.4034	4.29743	.//_peak_628
chr22	268146	270312	2167	204.24	6.02006	1.40338	4.27294	.//_peak_1045
chr8	291057	293326	2270	225.63	6.58361	1.40322	4.76979	.//_peak_1670
chr5	93101	94714	1614	274.78	8.41526	1.40321	6.44935	.//_peak_1392
chr14	339392	342692	3301	202.13	6.00983	1.403	4.26756	.//_peak_425
chr15	514942	518073	3132	202.33	6.05774	1.40291	4.31303	.//_peak_627
chr20	408243	411990	3748	335.9	9.47797	1.40173	7.38389	.//_peak_963
chr9	915803	916086	284	200.66	5.87868	1.40152	4.14635	.//_peak_1798
chr13	596233	597640	1408	200.49	5.98055	1.40142	4.24352	.//_peak_367
chr14	503953	504333	381	200.58	5.9909	1.40087	4.25511	.//_peak_450
chr3	599163	600649	1487	200.41	6.16966	1.40086	4.42686	.//_peak_1149
chr15	4191	5047	857	213.21	6.37931	1.40073	4.60515	.//_peak_540
chr3	963122	968126	5005	200.76	6.02272	1.40063	4.29005	.//_peak_1187
chr23	18707	26763	8057	203.67	6.05318	1.39963	4.31469	.//_peak_1065
chr9	1031797	1033549	1753	214.54	6.68534	1.39963	4.90624	.//_peak_1819
chr7	314889	319047	4159	204.49	5.86925	1.39903	4.13678	.//_peak_1581
chr14	344510	345240	731	202.44	5.94921	1.39896	4.21535	.//_peak_426
chr2	982773	985763	2991	200.05	5.88997	1.39838	4.16369	.//_peak_894
chr3	516040	517400	1361	200.31	5.91322	1.39768	4.18762	.//_peak_1141
chr1	57053	58319	1267	202.65	5.90295	1.39765	4.17503	.//_peak_3
chr23	93672	98903	5232	203.68	6.18565	1.3976	4.45249	.//_peak_1076
chr5	10788	26133	15346	300.57	8.63509	1.39747	6.6486	.//_peak_1384
chr11	678668	680338	1671	251.56	7.17108	1.39714	5.2964	.//_peak_273
chr15	524594	528814	4221	200.21	5.89235	1.3971	4.1708	.//_peak_629
chr11	180279	183969	3691	202.1	6.00577	1.39691	4.27703	.//_peak_186
chr17	206960	207393	434	258.15	7.15855	1.39674	5.26812	.//_peak_743
chr1	1737637	1738233	597	234.92	6.63936	1.39669	4.81595	.//_peak_79
chr15	166843	168275	1433	199.8	6.02362	1.39663	4.29944	.//_peak_565
chr24	303297	306555	3259	259.61	7.54215	1.39663	5.65005	.//_peak_1094
chr11	331118	332941	1824	205.55	6.12529	1.3965	4.38466	.//_peak_215
chr17	267019	268279	1261	245.91	7.01975	1.3962	5.16131	.//_peak_757
chr14	223085	229916	6832	202.43	5.85671	1.39564	4.13455	.//_peak_407
chr1	1777936	1780580	2645	241.39	7.18092	1.39559	5.33306	.//_peak_84
chr14	387944	389939	1996	211.85	6.12999	1.39554	4.37945	.//_peak_435
chr8	971266	975399	4134	247.11	7.00223	1.39538	5.18303	.//_peak_1728
chr7	735893	736219	327	200.91	5.74896	1.39526	4.03412	.//_peak_1634
chr9	267462	269270	1809	199.51	5.72318	1.39465	4.01198	.//_peak_1751
chr5	1545778	1548087	2310	204.02	6.14102	1.39464	4.40856	.//_peak_1458
chr10	356781	359189	2409	200.14	5.83472	1.39441	4.1197	.//_peak_107
chr17	30010	33330	3321	240.45	7.01409	1.39435	5.18036	.//_peak_714
chr11	604874	610760	5887	207.43	6.08147	1.39433	4.34821	.//_peak_263
chr23	187612	204533	16922	230.65	6.61835	1.39417	4.81685	.//_peak_1086
chr11	75586	76059	474	199.42	5.82303	1.39403	4.10976	.//_peak_164
chr15	340739	342260	1522	205.73	5.8549	1.39377	4.13067	.//_peak_597
chr21	220485	221241	757	205.76	5.85265	1.39364	4.12917	.//_peak_996
chr14	1002118	1004311	2194	199.49	5.89455	1.39317	4.17888	.//_peak_532
chr2	907321	907597	277	199.28	5.71586	1.39301	4.00736	.//_peak_889
chr20	98690	99303	614	238.91	6.65155	1.39272	4.82941	.//_peak_931
chr8	832675	836072	3398	243.89	6.95862	1.39267	5.1164	.//_peak_1708
chr2	1480149	1480555	407	199.21	5.65268	1.39256	3.94862	.//_peak_919
chr1	1632413	1637141	4729	241.94	6.85539	1.39235	5.02792	.//_peak_63
chr9	1221760	1223225	1466	203.58	5.75326	1.39204	4.04078	.//_peak_1844
chr9	942527	947592	5066	204.05	6.13184	1.39193	4.41049	.//_peak_1805
chr9	761570	762780	1211	199.17	5.87348	1.39161	4.16611	.//_peak_1778
chr27	42687	46052	3366	209.27	6.06517	1.39142	4.33609	.//_peak_1112
chr9	917262	918588	1327	199.04	5.74862	1.39135	4.04221	.//_peak_1799
chr11	340600	344966	4367	204.57	5.84671	1.39113	4.12954	.//_peak_216
chr18	419576	421662	2087	199.34	5.89527	1.39097	4.188	.//_peak_828
chr2	8963	11775	2813	280.99	7.86745	1.39076	5.95713	.//_peak_848
chr23	155442	169595	14154	215.97	6.23567	1.39066	4.4902	.//_peak_1082
chr23	212653	216146	3494	205.66	5.97612	1.39037	4.25612	.//_peak_1087
chr10	1200890	1201808	919	199.19	5.77982	1.3902	4.07563	.//_peak_154
chr16	65472	69029	3558	198.85	5.69769	1.39002	3.99933	.//_peak_670
chr15	191559	195999	4441	202.66	5.86976	1.38984	4.16016	.//_peak_569
chr9	972515	974395	1881	202.27	5.68883	1.38957	3.9858	.//_peak_1810
chr9	282099	285108	3010	231.91	6.61146	1.3895	4.81038	.//_peak_1752
chr15	398239	403110	4872	209.25	6.12806	1.38946	4.40519	.//_peak_608
chr26	10416	11605	1190	207.63	5.76519	1.38924	4.04727	.//_peak_1106
chr14	725490	726945	1456	215.91	6.01521	1.38919	4.27	.//_peak_489
chr7	685116	690285	5170	203.81	5.94612	1.38891	4.23319	.//_peak_1629
chr8	920940	921342	403	307.44	8.37677	1.38848	6.37086	.//_peak_1719
chr15	86802	90417	3616	252.01	7.13959	1.3882	5.2842	.//_peak_554
chr13	658159	659342	1184	198.77	5.71084	1.38803	4.01473	.//_peak_371
chr10	22707	23265	559	198.51	5.55525	1.38771	3.86603	.//_peak_87
chr14	818326	818694	369	201.57	5.62347	1.38759	3.92924	.//_peak_506
chr3	840921	844566	3646	203.31	5.82652	1.38711	4.11794	.//_peak_1177
chr23	27833	34153	6321	200.27	5.74163	1.38707	4.04445	.//_peak_1066
chr8	748076	749208	1133	198.39	5.65719	1.38686	3.96465	.//_peak_1700
chr10	934563	936767	2205	211.39	6.28756	1.38671	4.56349	.//_peak_147
chr19	132545	132874	330	243.09	6.45627	1.38648	4.64292	.//_peak_843
chr37	4633	5640	1008	384.74	10.7274	1.38625	8.60856	.//_peak_1269
chr4	1144292	1145611	1320	198.26	5.5156	1.38592	3.83116	.//_peak_1353
chr9	1053438	1053811	374	208.98	5.80757	1.38556	4.09216	.//_peak_1822
chr15	810090	811527	1438	199.26	5.45052	1.38533	3.76906	.//_peak_656
chr22	375568	380198	4631	239.38	6.4724	1.3851	4.67375	.//_peak_1049
chr7	898290	899685	1396	206.18	6.02041	1.38463	4.30151	.//_peak_1644
chr14	911707	913845	2139	210.46	5.74551	1.38442	4.03451	.//_peak_516
chr23	47710	52803	5094	208.83	5.88053	1.38433	4.1673	.//_peak_1070
chr2	1241747	1247150	5404	203.67	6.0053	1.38403	4.30533	.//_peak_913
chr20	295505	303122	7618	250.14	7.04823	1.38364	5.21953	.//_peak_960
chr7	301689	310813	9125	201.94	5.74094	1.38362	4.04726	.//_peak_1580
chr17	245605	246362	758	246.64	6.82302	1.38352	4.99968	.//_peak_753
chr5	331781	334888	3108	197.92	5.51962	1.3834	3.83966	.//_peak_1407
chr18	170430	174160	3731	202.92	5.89015	1.3831	4.19376	.//_peak_814
chr9	1057995	1063544	5550	200.9	5.6411	1.38294	3.95454	.//_peak_1823
chr2	415216	416025	810	197.81	5.73062	1.3828	4.04502	.//_peak_872
chr3	912602	917163	4562	200.35	5.55911	1.38261	3.87785	.//_peak_1180
chr18	274891	276486	1596	206.48	5.85571	1.38204	4.15673	.//_peak_818
chr14	600420	604108	3689	198.68	5.43206	1.382	3.75943	.//_peak_467
chr3	836632	837406	775	221.41	5.86821	1.38152	4.1341	.//_peak_1176
chr8	213423	214999	1577	199.5	5.55551	1.38148	3.87648	.//_peak_1666
chr3	659585	661185	1601	228.43	6.17776	1.38128	4.41725	.//_peak_1158
chr15	971173	974355	3183	197.47	5.49463	1.38045	3.82264	.//_peak_667
chr20	195879	202441	6563	262.11	7.17958	1.38044	5.32929	.//_peak_946
chr9	1268308	1268828	521	197.44	5.43384	1.38026	3.76438	.//_peak_1853
chr11	204766	206585	1820	209.01	5.76478	1.38024	4.0646	.//_peak_190
chr14	916080	917171	1092	201.11	5.62733	1.37995	3.94438	.//_peak_517
chr3	786239	788096	1858	197.4	5.34208	1.3798	3.67823	.//_peak_1170
chr14	21409	21830	422	197.38	5.32192	1.37979	3.65875	.//_peak_389
chr23	170650	177679	7030	207	5.67447	1.37956	3.98352	.//_peak_1083
chr12	527712	529658	1947	197.33	5.52216	1.37948	3.8523	.//_peak_330
chr23	178834	181167	2334	201.15	5.53512	1.37875	3.86198	.//_peak_1084
chr7	411481	416742	5262	218.31	6.05209	1.37841	4.324	.//_peak_1595
chr11	467716	470119	2404	197.49	5.77626	1.37839	4.10212	.//_peak_236
chr20	490572	491593	1022	199.35	5.42394	1.37803	3.75763	.//_peak_973
chr15	469694	471193	1500	197.77	5.33836	1.37729	3.67876	.//_peak_620
chr14	488549	488849	301	202	5.47175	1.37708	3.80045	.//_peak_446
chr17	289929	290204	276	248.02	6.37716	1.37695	4.57917	.//_peak_761
chr11	485615	489701	4087	203.65	5.56998	1.37688	3.89254	.//_peak_239
chr15	259228	263566	4339	228.91	6.09644	1.3767	4.34863	.//_peak_581
chr3	1371269	1373084	1816	216.78	6.17489	1.37659	4.45716	.//_peak_1231
chr14	672484	675356	2873	211.66	5.84697	1.37639	4.14131	.//_peak_479
chr15	59310	61088	1779	196.86	5.49883	1.3762	3.83646	.//_peak_548
chr22	411036	414588	3553	319.65	8.43894	1.37606	6.45904	.//_peak_1054
chr20	111170	121498	10329	247.07	6.81204	1.37602	5.01252	.//_peak_934
chr7	236921	238318	1398	344.28	9.13015	1.37595	7.10899	.//_peak_1569
chr7	560740	563986	3247	219.46	6.04013	1.37593	4.3277	.//_peak_1618
chr7	285898	288416	2519	202.96	5.4876	1.3759	3.81519	.//_peak_1578
chr1	1672241	1679330	7090	238.38	6.47682	1.37582	4.7077	.//_peak_67
chr5	1055185	1056069	885	216.95	5.73907	1.37516	4.03242	.//_peak_1436
chr18	163437	163820	384	196.67	5.29953	1.37491	3.64734	.//_peak_812
chr4	530662	537300	6639	200.78	5.5429	1.37488	3.87573	.//_peak_1313
chr16	104462	107981	3520	197.67	5.43999	1.37473	3.78325	.//_peak_672
chr12	1073525	1074154	630	196.63	5.34136	1.37458	3.68774	.//_peak_350
chr2	1215129	1216719	1591	199.12	5.32955	1.37436	3.67437	.//_peak_911
chr11	176431	178950	2520	196.9	5.36612	1.37419	3.71281	.//_peak_185
chr15	379231	383747	4517	199.09	5.80451	1.37408	4.14645	.//_peak_605
chr5	1257902	1260265	2364	197.66	5.25809	1.37348	3.60925	.//_peak_1444
chr11	1095854	1096397	544	196.45	5.21524	1.37332	3.57009	.//_peak_308
chr15	650614	651621	1008	202.19	5.6292	1.37326	3.96101	.//_peak_635
chr21	188234	188841	608	210.49	5.67094	1.37315	3.9851	.//_peak_990
chr11	366738	375210	8473	217.81	5.81431	1.3728	4.10823	.//_peak_221
chr7	372232	379574	7343	202.81	5.50192	1.37247	3.83826	.//_peak_1587
chr21	310306	314172	3867	200.3	5.45468	1.37232	3.79755	.//_peak_1015
chr2	27222	28671	1450	196.31	5.31817	1.37209	3.67181	.//_peak_851
chr24	214892	215719	828	196.38	5.30377	1.37193	3.65788	.//_peak_1091
chr31	5498	10693	5196	196.24	5.48779	1.37186	3.83789	.//_peak_1258
chr2	651695	655981	4287	209.37	5.55199	1.3715	3.87138	.//_peak_882
chr15	107485	107762	278	196.17	5.16604	1.37137	3.52686	.//_peak_556
chr3	21051	21831	781	202.14	5.4898	1.37099	3.82902	.//_peak_1116
chr15	64502	65925	1424	196.23	5.36867	1.37095	3.72173	.//_peak_549
chr20	138235	147419	9185	248.19	6.60099	1.37057	4.81939	.//_peak_936
chr14	945343	948548	3206	211.77	5.70278	1.37043	4.02251	.//_peak_523
chr12	941877	942808	932	196.03	5.28871	1.37042	3.64557	.//_peak_343
chr2	969899	970193	295	199.61	5.31359	1.37014	3.66587	.//_peak_893
chr17	102359	106030	3672	242.82	6.4306	1.3698	4.66071	.//_peak_726
chr21	226514	230689	4176	221.13	5.75278	1.36979	4.05176	.//_peak_997
chr6	317503	319428	1926	220.03	5.94401	1.36943	4.23428	.//_peak_1477
chr8	175454	176859	1406	199.75	5.30762	1.36939	3.65893	.//_peak_1662
chr14	779080	780636	1557	221.48	5.83858	1.36917	4.13124	.//_peak_499
chr2	424664	425047	384	235.43	6.08956	1.36893	4.33796	.//_peak_875
chr17	410541	412334	1794	253.75	6.62856	1.36879	4.836	.//_peak_780
chr11	583268	584368	1101	196.69	5.09705	1.36878	3.46596	.//_peak_256
chr6	1473265	1473975	711	197.99	5.29014	1.36822	3.64964	.//_peak_1541
chr20	148840	152669	3830	254.71	6.4966	1.36762	4.70135	.//_peak_937
chr8	900557	917167	16611	338.07	8.36765	1.36762	6.37697	.//_peak_1718
chr17	482696	485523	2828	195.62	5.14139	1.3676	3.51133	.//_peak_787
chr15	737979	750392	12414	200.44	5.26695	1.36747	3.62448	.//_peak_647
chr23	102934	105247	2314	210.77	5.5638	1.36747	3.89154	.//_peak_1078
chr6	704862	707335	2474	195.56	5.19748	1.36714	3.56534	.//_peak_1491
chr14	868170	876085	7916	218.93	5.72223	1.36684	4.02916	.//_peak_512
chr1	1615228	1615537	310	195.5	5.02347	1.36673	3.40076	.//_peak_60
chr21	174488	175279	792	204.44	5.39732	1.36668	3.74419	.//_peak_986
chr4	1466123	1466405	283	195.48	5.07123	1.36657	3.44618	.//_peak_1379
chr23	72814	74504	1691	205.84	5.26829	1.36651	3.61799	.//_peak_1074
chr8	595776	599470	3695	195.55	5.19529	1.36648	3.56507	.//_peak_1685
chr17	212165	212652	488	242.54	6.25729	1.36623	4.49903	.//_peak_744
chr9	1255038	1256011	974	198.97	5.17944	1.36614	3.54649	.//_peak_1849
chr9	1071314	1076083	4770	196.66	5.25873	1.36535	3.62885	.//_peak_1824
chr2	341468	343804	2337	219.66	5.95746	1.36533	4.25653	.//_peak_866
chr16	218321	218833	513	195.3	5.03038	1.36513	3.41055	.//_peak_674
chr26	12722	13127	406	271.55	7.02587	1.36502	5.19065	.//_peak_1107
chr1	1314742	1317889	3148	195.25	5.03408	1.365	3.41387	.//_peak_42
chr4	1001529	1002347	819	195.23	5.05147	1.36483	3.4306	.//_peak_1337
chr9	634902	637298	2397	195.25	5.09214	1.36461	3.4706	.//_peak_1766
chr1	213482	215058	1577	198.19	5.14422	1.36407	3.51549	.//_peak_4
chr17	293150	293669	520	235.37	5.87175	1.36391	4.14433	.//_peak_762
chr15	690008	694616	4609	207.68	5.41801	1.3639	3.76458	.//_peak_639
chr3	1068120	1071301	3182	233.22	6.12845	1.36389	4.39338	.//_peak_1196
chr20	203761	208876	5116	259.84	6.56294	1.36361	4.76602	.//_peak_947
chr25	75029	77408	2380	326.15	8.49273	1.36358	6.55886	.//_peak_1102
chr5	1171593	1172593	1001	209.89	5.40477	1.36352	3.7485	.//_peak_1441
chr2	1098607	1098928	322	195.96	5.11065	1.36343	3.48892	.//_peak_903
chr17	280472	285161	4690	262.65	6.79163	1.36334	5.00098	.//_peak_759
chr11	113778	114889	1112	198.28	5.1088	1.3633	3.48537	.//_peak_173
chr15	296388	301224	4837	212.87	5.57325	1.36306	3.90545	.//_peak_586
chr14	592397	594555	2159	194.97	5.14171	1.36302	3.52025	.//_peak_465
chr6	878966	880750	1785	194.95	5.09004	1.36288	3.47276	.//_peak_1497
chr11	1044816	1047056	2241	194.93	4.979	1.36275	3.36593	.//_peak_305
chr15	427680	432826	5147	198.77	5.18797	1.36253	3.5626	.//_peak_613
chr2	256698	257298	601	194.89	4.98547	1.36251	3.3725	.//_peak_864
chr18	201715	203973	2259	194.91	5.24465	1.36213	3.62387	.//_peak_816
chr3	1095532	1096617	1086	195.35	5.18406	1.362	3.56189	.//_peak_1199
chr11	634482	636160	1679	194.84	5.10355	1.36192	3.48609	.//_peak_265
chr7	366428	371221	4794	205.44	5.41445	1.36191	3.76982	.//_peak_1586
chr15	407405	407711	307	194.95	4.95062	1.36175	3.3411	.//_peak_609
chr10	607030	607628	599	205.25	5.28665	1.36174	3.64326	.//_peak_127
chr9	840155	841057	903	220.49	5.53638	1.36163	3.85691	.//_peak_1783
chr3	782940	783266	327	194.74	4.99364	1.36145	3.38206	.//_peak_1169
chr35	28630	33163	4534	194.77	5.06598	1.36137	3.45202	.//_peak_1267
chr8	634090	635437	1348	195.08	5.06346	1.36136	3.44839	.//_peak_1694
chr13	748392	749036	645	194.71	4.90791	1.36122	3.30142	.//_peak_379
chr12	82825	86690	3866	194.68	5.06604	1.36101	3.45252	.//_peak_313
chr11	642336	645292	2957	214.1	5.50678	1.36096	3.83782	.//_peak_267
chr14	195669	195961	293	194.91	4.90915	1.36085	3.30309	.//_peak_403
chr14	768557	773251	4695	195.83	5.0495	1.36073	3.43614	.//_peak_497
chr11	458262	464989	6728	200.16	5.10032	1.36068	3.47949	.//_peak_235
chr8	280394	283482	3089	200.32	5.18855	1.36068	3.56151	.//_peak_1668
chr14	135775	136071	297	194.62	4.95878	1.3606	3.35058	.//_peak_397
chr1	1178252	1178541	290	194.59	4.8741	1.36043	3.27092	.//_peak_36
chr17	492304	492653	350	194.58	4.95283	1.36033	3.3457	.//_peak_789
chr5	1276715	1278079	1365	194.52	5.03103	1.35992	3.42043	.//_peak_1446
chr8	807295	807897	603	204.72	5.24018	1.35988	3.60478	.//_peak_1702
chr17	60019	61835	1817	250.99	6.27234	1.35974	4.50821	.//_peak_720
chr22	285336	287851	2516	207.57	5.47529	1.35971	3.82308	.//_peak_1046
chr7	1079118	1079678	561	198.17	5.04937	1.35968	3.43536	.//_peak_1646
chr11	515921	517117	1197	194.97	4.91241	1.35956	3.30932	.//_peak_243
chr20	481493	488285	6793	232.95	5.86551	1.35951	4.16036	.//_peak_972
chr6	938005	939911	1907	194.79	4.96235	1.35931	3.35708	.//_peak_1502
chr8	1126341	1130788	4448	219.9	5.59831	1.35915	3.9215	.//_peak_1735
chr15	134043	137015	2973	203.01	5.25826	1.35873	3.62511	.//_peak_560
chr13	962642	963651	1010	194.34	5.01064	1.35868	3.40395	.//_peak_383
chr3	1434686	1435836	1151	195.58	4.94977	1.35859	3.34595	.//_peak_1242
chr1	279007	279269	263	194.32	4.89916	1.35848	3.29859	.//_peak_6
chr22	320433	320745	313	194.26	4.9021	1.35813	3.30204	.//_peak_1048
chr5	1037725	1040159	2435	223.48	5.79716	1.35812	4.11276	.//_peak_1435
chr11	254988	255730	743	225.45	5.68487	1.35796	3.99592	.//_peak_202
chr8	1074056	1074529	474	209.94	5.33225	1.35785	3.68833	.//_peak_1733
chr11	595783	597336	1554	195.65	4.87481	1.35778	3.27576	.//_peak_261
chr5	303951	305761	1811	196.24	5.04566	1.35777	3.43867	.//_peak_1403
chr11	742354	744518	2165	237.72	5.87319	1.35769	4.15364	.//_peak_282
chr15	709331	711190	1860	246.32	6.09042	1.35765	4.3493	.//_peak_642
chr11	173006	174744	1739	209.03	5.26584	1.35754	3.62625	.//_peak_184
chr23	3832	15504	11673	199.3	5.05064	1.35711	3.43863	.//_peak_1063
chr11	481479	483877	2399	202.84	5.15356	1.35696	3.53383	.//_peak_238
chr8	500005	503781	3777	194.08	4.97248	1.35687	3.37212	.//_peak_1680
chr22	225230	228997	3768	342.72	7.89253	1.3566	5.9335	.//_peak_1042
chr23	110005	122431	12427	199.17	5.08881	1.3565	3.47843	.//_peak_1079
chr9	1159318	1160014	697	202.91	4.98035	1.35631	3.36834	.//_peak_1835
chr3	982752	985608	2857	199.29	5.04461	1.35623	3.43419	.//_peak_1190
chr3	609685	612710	3026	200.07	5.02623	1.3562	3.41368	.//_peak_1150
chr1	8326	10549	2224	214.71	5.48722	1.35615	3.833	.//_peak_1
chr17	574003	574338	336	193.93	4.81985	1.35581	3.22817	.//_peak_794
chr13	996909	998791	1883	193.92	4.88429	1.35577	3.28943	.//_peak_384
chr15	588036	591271	3236	196.51	4.82177	1.35567	3.2275	.//_peak_634
chr2	548199	548799	601	193.95	4.85402	1.35563	3.26141	.//_peak_878
chr2	421702	422009	308	199.62	4.90012	1.35555	3.29741	.//_peak_874
chr11	817041	818589	1549	194.14	4.97155	1.35532	3.37402	.//_peak_297
chr13	313685	314526	842	194.08	4.88696	1.3551	3.29341	.//_peak_356
chr7	204183	218463	14281	291.01	7.2544	1.35479	5.40609	.//_peak_1564
chr17	599503	600414	912	193.78	4.7846	1.35478	3.19674	.//_peak_796
chr20	428457	435835	7379	332.91	8.0197	1.35472	6.08255	.//_peak_966
chr25	745	13832	13088	299.14	7.6	1.35462	5.73752	.//_peak_1095
chr15	454538	455688	1151	193.71	4.94033	1.35427	3.34662	.//_peak_617
chr11	538742	539153	412	195.82	4.89699	1.35424	3.30247	.//_peak_248
chr11	243604	252431	8828	213.59	5.31884	1.35404	3.67562	.//_peak_201
chr20	52996	56656	3661	240.88	5.9547	1.35398	4.23712	.//_peak_925
chr9	1261859	1264035	2177	196.6	4.93516	1.3539	3.33769	.//_peak_1852
chr15	233201	234578	1378	209.86	5.21904	1.35355	3.58639	.//_peak_576
chr12	1089799	1091773	1975	193.58	4.76216	1.35336	3.17797	.//_peak_351
chr9	1153700	1155617	1918	194.39	4.86576	1.35331	3.27671	.//_peak_1833
chr5	103971	106842	2872	232.54	5.76753	1.35311	4.07788	.//_peak_1393
chr15	485933	489494	3562	219.87	5.73875	1.35305	4.06734	.//_peak_622
chr11	883489	883992	504	194.01	4.87221	1.35304	3.2825	.//_peak_302
chr7	279436	283053	3618	193.81	5.01254	1.35303	3.41929	.//_peak_1577
chr17	273566	277182	3617	265.18	6.88651	1.35287	5.11908	.//_peak_758
chr3	226161	226716	556	193.5	4.8152	1.35282	3.22911	.//_peak_1129
chr4	614298	615123	826	193.58	4.76924	1.35264	3.18614	.//_peak_1322
chr21	200672	200975	304	199.22	4.86437	1.35257	3.27166	.//_peak_992
chr23	86107	88126	2020	223.14	5.47104	1.35257	3.80675	.//_peak_1075
chr7	463148	478559	15412	203.11	5.0505	1.35243	3.44105	.//_peak_1601
chr18	499022	501228	2207	199.36	4.95348	1.35236	3.35458	.//_peak_834
chr4	113372	114433	1062	289.23	6.87886	1.35235	5.04495	.//_peak_1292
chr12	644443	645390	948	203.05	5.08747	1.35215	3.47694	.//_peak_339
chr9	1205201	1205739	539	193.97	4.90743	1.35215	3.31934	.//_peak_1842
chr17	337168	340156	2989	236.48	5.65205	1.35213	3.9571	.//_peak_768
chr9	633583	633894	312	193.38	4.74115	1.35203	3.16063	.//_peak_1765
chr11	413727	415254	1528	195.84	4.91348	1.35187	3.32368	.//_peak_228
chr14	748762	753942	5181	194.13	4.87882	1.35184	3.29201	.//_peak_494
chr37	13737	26291	12555	327.05	7.7422	1.35184	5.83806	.//_peak_1270
chr15	504117	506797	2681	194.45	4.76686	1.35182	3.18768	.//_peak_625
chr9	1116793	1119590	2798	194.38	4.79413	1.3518	3.21101	.//_peak_1829
chr6	1374021	1377049	3029	193.38	4.86445	1.35177	3.27828	.//_peak_1533
chr8	648997	650643	1647	193.33	4.94457	1.35164	3.3563	.//_peak_1695
chr14	650292	660586	10295	207.63	5.22183	1.35149	3.59955	.//_peak_475
chr2	418485	419271	787	193.3	4.78965	1.35142	3.2076	.//_peak_873
chr15	240538	241071	534	285.4	7.03566	1.35135	5.21096	.//_peak_578
chr1	216507	217252	746	197.58	4.99057	1.35121	3.39446	.//_peak_5
chr8	801307	804137	2831	263.08	6.64268	1.35107	4.87261	.//_peak_1701
chr2	217739	218211	473	194.37	4.68114	1.35094	3.105	.//_peak_861
chr15	338877	339204	328	193.32	4.71691	1.35092	3.13993	.//_peak_596
chr22	454981	456444	1464	223.56	5.61948	1.35075	3.95942	.//_peak_1059
chr4	1454057	1455864	1808	193.21	4.93157	1.35073	3.34576	.//_peak_1377
chr17	512071	515021	2951	193.64	4.78165	1.3502	3.20224	.//_peak_793
chr12	587519	588909	1391	235.95	5.75569	1.34957	4.06221	.//_peak_333
chr20	212034	218084	6051	242.52	5.7054	1.34946	4.00539	.//_peak_948
chr6	951290	961091	9802	193	4.87617	1.3493	3.29576	.//_peak_1504
chr21	335836	338541	2706	205.31	5.00626	1.34928	3.40094	.//_peak_1020
chr9	976052	980472	4421	206.19	5.08811	1.3492	3.47878	.//_peak_1811
chr2	57855	60361	2507	235.29	5.78414	1.3491	4.08659	.//_peak_855
chr11	812921	815319	2399	194.61	4.83172	1.34907	3.25188	.//_peak_296
chr5	237847	240975	3129	203.44	5.20389	1.34906	3.60027	.//_peak_1397
chr7	490220	499645	9426	201.56	4.98803	1.34899	3.39341	.//_peak_1606
chr31	21179	26866	5688	195.95	5.02141	1.34898	3.43133	.//_peak_1260
chr4	1102154	1102471	318	192.94	4.79177	1.34896	3.21443	.//_peak_1347
chr21	448425	449524	1100	201.3	4.93567	1.3488	3.34068	.//_peak_1034
chr22	19933	20351	419	192.92	4.83671	1.34879	3.25823	.//_peak_1038
chr17	352418	354044	1627	248.83	5.97086	1.34858	4.24702	.//_peak_771
chr3	1365537	1366643	1107	200.04	4.81446	1.34854	3.22896	.//_peak_1230
chr15	476017	481367	5351	197.46	4.97452	1.34844	3.38566	.//_peak_621
chr7	167513	168905	1393	352.59	8.09744	1.34812	6.13444	.//_peak_1559
chr9	934017	935667	1651	198.04	4.88872	1.34799	3.30263	.//_peak_1803
chr15	348582	349478	897	192.81	4.65763	1.34795	3.08928	.//_peak_598
chr14	950629	952384	1756	201.21	4.81527	1.34784	3.22862	.//_peak_524
chr5	901128	902150	1023	193.99	4.86962	1.34782	3.28849	.//_peak_1430
chr3	1469710	1470093	384	192.79	4.58804	1.34741	3.02457	.//_peak_1248
chr5	329028	329545	518	193.29	4.62321	1.3474	3.05778	.//_peak_1406
chr21	460732	462566	1835	199.31	4.76883	1.34731	3.18937	.//_peak_1036
chr7	487685	489009	1325	194.81	4.96977	1.34728	3.38605	.//_peak_1605
chr3	1575627	1576674	1048	197.26	4.90885	1.3472	3.32165	.//_peak_1257
chr13	828987	832002	3016	192.68	4.7906	1.34714	3.21796	.//_peak_381
chr12	513430	515150	1721	192.63	4.66169	1.34678	3.09572	.//_peak_329
chr14	507959	509249	1291	198.81	4.75474	1.34665	3.17678	.//_peak_451
chr10	360217	362022	1806	197.84	5.05734	1.34658	3.46242	.//_peak_108
chr14	255934	257222	1289	192.73	4.68283	1.34631	3.11648	.//_peak_412
chr11	810551	811713	1163	194.14	4.72631	1.34618	3.15791	.//_peak_295
chr17	388293	389138	846	286.18	6.72001	1.34598	4.9153	.//_peak_777
chr1	1646349	1649938	3590	257.32	6.08149	1.34595	4.34954	.//_peak_64
chr5	1551321	1552557	1237	212.09	5.08744	1.34587	3.47833	.//_peak_1459
chr5	1149031	1151560	2530	197.24	4.77566	1.34586	3.2007	.//_peak_1438
chr4	1413181	1415630	2450	195.4	4.73644	1.34584	3.16535	.//_peak_1371
chr9	650062	652640	2579	192.49	4.75166	1.34579	3.18316	.//_peak_1767
chr9	801279	801838	560	192.46	4.6973	1.34559	3.13156	.//_peak_1779
chr5	509700	513010	3311	192.45	4.7221	1.34553	3.15503	.//_peak_1422
chr9	838012	838765	754	241.65	5.68641	1.34553	3.99455	.//_peak_1782
chr24	301078	301668	591	199.27	4.73692	1.34551	3.16087	.//_peak_1093
chr6	516876	517726	851	195.35	4.67097	1.34546	3.10303	.//_peak_1484
chr11	144081	146152	2072	193.27	4.66601	1.34534	3.10219	.//_peak_177
chr10	27185	28983	1799	205.15	5.17789	1.34508	3.56546	.//_peak_88
chr7	153907	160693	6787	288.64	6.6208	1.34491	4.818	.//_peak_1557
chr3	829367	832037	2671	199.33	4.82583	1.34489	3.24489	.//_peak_1175
chr3	537822	543012	5191	196.56	4.7687	1.34487	3.19466	.//_peak_1142
chr11	132207	133426	1220	192.47	4.62749	1.34484	3.06697	.//_peak_175
chr10	311479	313015	1537	192.35	4.67475	1.34482	3.11146	.//_peak_105
chr11	666507	667943	1437	215.86	5.0299	1.34478	3.41253	.//_peak_271
chr20	180357	184275	3919	255.84	6.8069	1.34477	5.11011	.//_peak_944
chr15	779413	780988	1576	193.42	4.6828	1.34469	3.11847	.//_peak_652
chr1	1722510	1723259	750	214.38	5.08967	1.3446	3.47306	.//_peak_74
chr14	301922	303232	1311	193.95	4.71292	1.34413	3.14906	.//_peak_419
chr6	1459000	1460078	1079	196.35	4.67448	1.34404	3.10973	.//_peak_1539
chr14	559915	561712	1798	200.03	4.7131	1.34402	3.14019	.//_peak_460
chr2	1050228	1053025	2798	194.06	4.67462	1.344	3.11157	.//_peak_897
chr5	1568305	1570572	2268	204.02	4.85715	1.34382	3.26839	.//_peak_1462
chr7	348398	362318	13921	197.62	4.80166	1.34379	3.228	.//_peak_1585
chr11	1106706	1107146	441	252.84	5.72847	1.34356	4.02465	.//_peak_309
chr6	891531	892628	1098	192.13	4.66019	1.34332	3.09994	.//_peak_1498
chr14	902865	910348	7484	215.85	5.3507	1.34315	3.7319	.//_peak_515
chr8	740599	741083	485	192.1	4.551	1.3431	2.99736	.//_peak_1699
chr35	21525	22842	1318	192.3	4.55477	1.34309	3.00088	.//_peak_1265
chr5	67506	69104	1599	192.09	4.61364	1.34303	3.05673	.//_peak_1388
chr9	830972	831474	503	192.07	4.56478	1.34287	3.01079	.//_peak_1781
chr11	476760	480417	3658	208.97	4.94512	1.34262	3.34967	.//_peak_237
chr13	678295	679040	746	192.36	4.63506	1.34229	3.07848	.//_peak_374
chr9	849640	849888	249	199.29	4.62912	1.34212	3.06455	.//_peak_1784
chr1	1036200	1038802	2603	192.08	4.5615	1.3421	3.0092	.//_peak_31
chr6	940905	941598	694	192.35	4.67237	1.34189	3.11549	.//_peak_1503
chr23	36867	37243	377	191.96	4.5833	1.34182	3.03059	.//_peak_1068
chr17	613465	614393	929	191.89	4.63678	1.3416	3.08218	.//_peak_797
chr17	55130	58122	2993	239.66	5.65816	1.3415	3.97917	.//_peak_719
chr14	918506	921412	2907	193.6	4.6718	1.34117	3.11394	.//_peak_518
chr3	1387317	1388968	1652	212.14	4.95082	1.34088	3.35121	.//_peak_1235
chr11	653192	653930	739	191.75	4.58032	1.34063	3.02977	.//_peak_269
chr17	438985	441860	2876	210.1	5.01917	1.34058	3.42025	.//_peak_786
chr18	378281	380479	2199	210.56	4.97784	1.34034	3.37911	.//_peak_824
chr11	794259	795364	1106	193.97	4.70061	1.34032	3.14326	.//_peak_291
chr1	1544507	1546892	2386	191.7	4.55064	1.3403	3.00236	.//_peak_55
chr23	100802	101095	294	194.09	4.58754	1.34017	3.03668	.//_peak_1077
chr9	855591	858020	2430	193.76	4.63473	1.34013	3.08065	.//_peak_1786
chr17	160398	163593	3196	246.33	5.75548	1.33995	4.06389	.//_peak_735
chr20	289333	294435	5103	251.47	5.86711	1.33989	4.16205	.//_peak_959
chr1	1627315	1628032	718	255.33	6.00469	1.33985	4.28825	.//_peak_62
chr12	814611	816072	1462	191.63	4.52612	1.33976	2.98049	.//_peak_340
chr7	527236	529891	2656	202.66	4.76805	1.33956	3.1969	.//_peak_1611
chr12	451992	452422	431	191.57	4.63223	1.33943	3.08122	.//_peak_326
chr2	743368	743693	326	191.56	4.52481	1.33932	2.97926	.//_peak_885
chr11	525835	528667	2833	203.05	4.80073	1.33928	3.22779	.//_peak_245
chr6	1498022	1502526	4505	318.67	6.96143	1.33928	5.10514	.//_peak_1546
chr6	1308845	1309727	883	191.53	4.51365	1.33911	2.96938	.//_peak_1530
chr16	31991	33694	1704	194.67	4.53487	1.33905	2.9872	.//_peak_669
chr9	887187	889563	2377	193.65	4.81194	1.33902	3.25516	.//_peak_1792
chr21	280648	283531	2884	203.78	4.91275	1.33889	3.33299	.//_peak_1007
chr13	746456	746729	274	191.48	4.43556	1.33879	2.89584	.//_peak_378
chr4	1555406	1556617	1212	192.04	4.57868	1.33861	3.03228	.//_peak_1382
chr22	222407	224000	1594	375.23	8.64361	1.33844	6.67398	.//_peak_1041
chr14	273652	278148	4497	193.12	4.66595	1.33832	3.11655	.//_peak_416
chr14	703892	705181	1290	191.4	4.50465	1.33823	2.9622	.//_peak_485
chr21	240561	242074	1514	192.6	4.68514	1.33778	3.13588	.//_peak_1000
chr14	1017136	1020189	3054	204.54	4.76194	1.33776	3.19087	.//_peak_535
chr23	35176	35748	573	191.8	4.51157	1.33754	2.97026	.//_peak_1067
chr15	500860	501823	964	198.2	4.65451	1.33731	3.09776	.//_peak_624
chr8	814180	815840	1661	237.96	5.44521	1.33705	3.79025	.//_peak_1703
chr14	178442	180386	1945	191.21	4.53129	1.33693	2.98994	.//_peak_400
chr2	1060785	1065469	4685	191.21	4.56931	1.33689	3.02792	.//_peak_899
chr7	398478	399164	687	217.29	5.03327	1.33685	3.4274	.//_peak_1591
chr16	614300	614654	355	231.47	5.10183	1.33666	3.47182	.//_peak_699
chr8	159135	161310	2176	191.38	4.43045	1.33665	2.8952	.//_peak_1661
chr4	832595	833538	944	191.15	4.48303	1.33647	2.94505	.//_peak_1331
chr5	493010	494778	1769	191.59	4.40899	1.33625	2.87552	.//_peak_1420
chr2	497395	500666	3272	191.66	4.44294	1.33602	2.90754	.//_peak_877
chr11	749442	750575	1134	231.02	5.21717	1.33601	3.58593	.//_peak_283
chr5	1015914	1017643	1730	204.02	4.86069	1.33586	3.28241	.//_peak_1433
chr11	79784	81342	1559	200.12	4.5975	1.33562	3.04311	.//_peak_166
chr9	1005818	1012309	6492	195.98	4.63215	1.33536	3.08241	.//_peak_1815
chr18	318977	321458	2482	190.97	4.38502	1.33525	2.85477	.//_peak_821
chr15	727422	728264	843	190.97	4.49953	1.33511	2.96397	.//_peak_645
chr11	1018693	1021114	2422	201.09	4.89069	1.33496	3.32093	.//_peak_304
chr2	1316584	1317158	575	190.92	4.34362	1.33491	2.81642	.//_peak_916
chr15	325412	327517	2106	196.97	4.59831	1.33482	3.05203	.//_peak_593
chr15	734281	734725	445	192.43	4.48779	1.3347	2.9534	.//_peak_646
chr11	97390	101150	3761	193.92	4.45992	1.33458	2.92295	.//_peak_169
chr5	402467	404045	1579	190.85	4.39014	1.33434	2.86124	.//_peak_1414
chr21	301214	303165	1952	194.64	4.5283	1.33411	2.98982	.//_peak_1012
chr7	446171	452495	6325	218.01	5.05437	1.33389	3.45115	.//_peak_1598
chr3	1339673	1340943	1271	203.18	4.62057	1.33364	3.06398	.//_peak_1225
chr5	52305	53925	1621	190.73	4.42458	1.33353	2.89546	.//_peak_1386
chr3	925062	930678	5617	190.77	4.44714	1.33332	2.91765	.//_peak_1183
chr10	247449	249131	1683	219.81	4.97214	1.3333	3.37206	.//_peak_101
chr21	249057	253746	4690	215.04	4.86258	1.3333	3.27561	.//_peak_1002
chr9	859473	861269	1797	191.17	4.40993	1.33317	2.88226	.//_peak_1787
chr20	73242	88942	15701	236.42	5.3153	1.33295	3.67545	.//_peak_929
chr16	305472	305855	384	190.75	4.43148	1.33289	2.90371	.//_peak_681
chr1	803364	803616	253	190.63	4.31388	1.33285	2.79195	.//_peak_19
chr11	134814	135544	731	195.57	4.47504	1.33272	2.94048	.//_peak_176
chr3	1160871	1163366	2496	190.99	4.60042	1.33271	3.06378	.//_peak_1207
chr18	652859	653113	255	190.6	4.3142	1.33269	2.79283	.//_peak_841
chr15	15609	16863	1255	212.03	4.73193	1.33266	3.15748	.//_peak_542
chr4	88299	92245	3947	306.39	6.75041	1.33261	4.94561	.//_peak_1288
chr9	1248450	1251500	3051	196.75	4.56154	1.33254	3.02176	.//_peak_1847
chr15	238189	239069	881	229.15	5.07357	1.33245	3.45403	.//_peak_577
chr3	1479754	1481851	2098	191.35	4.4197	1.33244	2.89257	.//_peak_1250
chr2	38656	39258	603	190.56	4.2828	1.33236	2.76366	.//_peak_854
chr20	275507	285803	10297	240.92	5.28724	1.33236	3.63963	.//_peak_958
chr17	119877	120962	1086	233.81	5.17502	1.33233	3.54328	.//_peak_730
chr15	868737	870041	1305	190.61	4.3768	1.33206	2.85328	.//_peak_663
chr14	998191	999440	1250	207.47	4.67484	1.33188	3.11231	.//_peak_531
chr11	152188	155372	3185	221.85	4.93749	1.33181	3.34137	.//_peak_178
chr4	748748	751860	3113	218.8	5.09574	1.33178	3.4954	.//_peak_1328
chr8	369572	374051	4480	190.47	4.39561	1.33176	2.87146	.//_peak_1672
chr17	365069	368406	3338	248.27	5.5684	1.3317	3.90268	.//_peak_774
chr4	1156572	1157822	1251	190.52	4.35063	1.33159	2.82927	.//_peak_1355
chr15	769826	772522	2697	195.36	4.48023	1.33153	2.94753	.//_peak_650
chr15	23347	24166	820	232.09	5.23849	1.33149	3.60794	.//_peak_544
chr21	276193	279041	2849	217.31	4.99318	1.33146	3.40265	.//_peak_1006
chr11	360535	361398	864	208	4.73728	1.33139	3.17207	.//_peak_219
chr3	40248	41006	759	190.5	4.32136	1.3312	2.80236	.//_peak_1120
chr6	27696	28050	355	190.38	4.29072	1.3311	2.77332	.//_peak_1469
chr7	391703	395246	3544	219	5.01165	1.33099	3.41719	.//_peak_1590
chr7	402748	405013	2266	208.24	4.60817	1.33081	3.04977	.//_peak_1592
chr1	1479086	1480883	1798	190.32	4.3235	1.33075	2.80478	.//_peak_52
chr11	753736	755177	1442	225.5	4.99985	1.33068	3.39326	.//_peak_284
chr6	1119355	1119659	305	190.3	4.28332	1.33058	2.76721	.//_peak_1518
chr17	184447	184922	476	242.12	5.19125	1.33038	3.5501	.//_peak_739
chr7	381478	382139	662	190.38	4.38448	1.33007	2.86364	.//_peak_1588
chr8	227396	229111	1716	190.21	4.36926	1.32997	2.84974	.//_peak_1667
chr3	1393914	1394464	551	203.07	4.52006	1.32992	2.97509	.//_peak_1236
chr13	1064245	1065242	998	190.19	4.39977	1.32981	2.87842	.//_peak_386
chr8	567669	568226	558	193.38	4.33705	1.32972	2.81606	.//_peak_1682
chr14	511374	515048	3675	212.37	4.77225	1.32965	3.20063	.//_peak_452
chr15	386165	388759	2595	201.79	4.48839	1.32965	2.94907	.//_peak_606
chr1	1689720	1695637	5918	245.24	5.44409	1.32958	3.79478	.//_peak_68
chr10	637596	637938	343	190.1	4.26735	1.32919	2.7546	.//_peak_132
chr10	795969	796382	414	190.1	4.24924	1.32919	2.7375	.//_peak_139
chr1	52125	52997	873	209.05	4.62377	1.32914	3.07116	.//_peak_2
chr1	1706203	1706767	565	212.65	4.68497	1.32904	3.11913	.//_peak_69
chr9	1253288	1253916	629	201.92	4.48233	1.32892	2.94232	.//_peak_1848
chr5	57726	60410	2685	190.05	4.32162	1.32886	2.80696	.//_peak_1387
chr14	810440	812908	2469	191.96	4.32987	1.32883	2.81253	.//_peak_504
chr14	397356	397857	502	194.26	4.29208	1.32879	2.77483	.//_peak_437
chr15	29532	39734	10203	210.77	4.79127	1.32877	3.22572	.//_peak_545
chr4	117525	119730	2206	268.92	5.80402	1.32866	4.09481	.//_peak_1293
chr20	241916	245348	3433	256.98	5.58991	1.32836	3.91424	.//_peak_952
chr9	62214	62516	303	261.39	5.54424	1.32836	3.85821	.//_peak_1738
chr11	492041	493111	1071	191.66	4.39742	1.32812	2.8788	.//_peak_240
chr1	1379644	1383004	3361	189.94	4.24658	1.32807	2.73723	.//_peak_48
chr4	658364	660481	2118	204.66	4.52241	1.32804	2.97963	.//_peak_1324
chr11	302069	302817	749	224.72	4.87221	1.32802	3.28042	.//_peak_210
chr3	1306897	1308594	1698	190.12	4.3167	1.328	2.80366	.//_peak_1222
chr14	204422	206064	1643	224.48	4.89268	1.3279	3.29854	.//_peak_404
chr9	919726	920842	1117	190.3	4.32305	1.32786	2.81019	.//_peak_1800
chr15	946721	949856	3136	190.83	4.28049	1.32779	2.76853	.//_peak_666
chr12	583050	583375	326	189.89	4.20412	1.3277	2.69779	.//_peak_332
chr3	679271	679710	440	191.54	4.28795	1.32761	2.77863	.//_peak_1160
chr14	409552	410962	1411	191.73	4.35245	1.32757	2.83672	.//_peak_439
chr31	32347	33095	749	189.82	4.35483	1.32722	2.84114	.//_peak_1261
chr3	1378340	1381091	2752	211.62	4.67681	1.32709	3.11687	.//_peak_1233
chr11	56395	58658	2264	209.36	4.60145	1.32702	3.04881	.//_peak_162
chr17	303194	305349	2156	232.84	4.97105	1.327	3.36133	.//_peak_764
chr5	1562376	1565566	3191	205.76	4.56656	1.3269	3.02193	.//_peak_1461
chr9	1102514	1105424	2911	192.16	4.30773	1.3266	2.79546	.//_peak_1827
chr2	1117816	1120623	2808	199.58	4.47295	1.32659	2.94156	.//_peak_906
chr4	40298	40808	511	211.93	4.64803	1.32647	3.09014	.//_peak_1278
chr7	407619	410098	2480	196.71	4.34725	1.32594	2.82891	.//_peak_1594
chr11	314460	315684	1225	191.07	4.26185	1.32588	2.75495	.//_peak_212
chr11	161039	162133	1095	190.59	4.27382	1.32566	2.76806	.//_peak_181
chr29	34916	37919	3004	190.14	4.38562	1.32541	2.87314	.//_peak_1114
chr4	1282585	1283948	1364	189.57	4.24995	1.32539	2.74542	.//_peak_1360
chr17	24151	26035	1885	226.16	5.03278	1.3253	3.43721	.//_peak_713
chr17	138960	140230	1271	240.8	5.24507	1.32514	3.61352	.//_peak_733
chr13	346053	346847	795	189.51	4.17454	1.32507	2.67426	.//_peak_358
chr10	510392	511617	1226	189.5	4.22102	1.325	2.7185	.//_peak_121
chr11	799668	803230	3563	192.08	4.29158	1.32475	2.78559	.//_peak_293
chr17	117596	118742	1147	226.08	4.85319	1.3246	3.26415	.//_peak_729
chr15	420849	422202	1354	194.32	4.26461	1.3245	2.75488	.//_peak_612
chr15	675189	676961	1773	189.43	4.2067	1.3245	2.70593	.//_peak_637
chr3	1131880	1134527	2648	189.51	4.25834	1.32433	2.755	.//_peak_1203
chr7	385308	387350	2043	193.79	4.3152	1.32431	2.80461	.//_peak_1589
chr17	357815	358113	299	225.65	4.80502	1.32427	3.21961	.//_peak_772
chr2	1301699	1302421	723	189.38	4.23965	1.32421	2.73762	.//_peak_915
chr21	101779	103802	2024	197.43	4.33862	1.32419	2.82283	.//_peak_977
chr3	1019787	1020310	524	189.37	4.24517	1.32411	2.74267	.//_peak_1192
chr9	964588	967864	3277	190.78	4.33859	1.32404	2.83167	.//_peak_1809
chr4	1314429	1316033	1605	205.28	4.60826	1.32381	3.06335	.//_peak_1364
chr17	507438	508858	1421	189.32	4.23191	1.32379	2.73124	.//_peak_792
chr2	1348442	1351224	2783	189.32	4.22119	1.32378	2.7211	.//_peak_918
chr1	771681	775010	3330	189.32	4.25506	1.32376	2.75319	.//_peak_18
chr9	898006	900880	2875	194.88	4.43232	1.32375	2.91628	.//_peak_1794
chr14	310077	313033	2957	190.38	4.26211	1.32359	2.75987	.//_peak_421
chr4	143005	143288	284	197.87	4.26913	1.32355	2.75713	.//_peak_1296
chr11	589879	591631	1753	189.44	4.24246	1.3235	2.742	.//_peak_259
chr4	412823	414607	1785	203.06	4.58885	1.3235	3.05705	.//_peak_1308
chr7	229581	232120	2540	320.14	6.86971	1.3233	5.06025	.//_peak_1568
chr17	86624	87267	644	247.85	5.19582	1.32318	3.55853	.//_peak_723
chr8	829890	830529	640	237.66	4.9658	1.32284	3.35743	.//_peak_1707
chr11	585367	585741	375	189.39	4.09404	1.32239	2.60502	.//_peak_257
chr23	225316	229225	3910	194.71	4.24845	1.32233	2.7449	.//_peak_1089
chr21	160316	163927	3612	204.8	4.47995	1.32231	2.94756	.//_peak_984
chr1	1708259	1710952	2694	205.34	4.57481	1.32227	3.0382	.//_peak_70
chr9	1235629	1240744	5116	189.49	4.16849	1.3222	2.67408	.//_peak_1846
chr15	510835	511687	853	194.15	4.2649	1.32212	2.76157	.//_peak_626
chr14	373423	374696	1274	192.98	4.23293	1.32211	2.73206	.//_peak_432
chr7	136380	139240	2861	270.01	5.69472	1.32205	4.00501	.//_peak_1554
chr21	393660	397125	3466	190.54	4.28259	1.322	2.78131	.//_peak_1027
chr14	547122	548765	1644	191.49	4.20379	1.32189	2.70765	.//_peak_456
chr14	1034873	1037067	2195	191.69	4.16008	1.32181	2.66504	.//_peak_538
chr9	1081927	1083383	1457	195.71	4.23489	1.32154	2.73119	.//_peak_1826
chr9	162964	164878	1915	191.65	4.19947	1.32153	2.70095	.//_peak_1746
chr7	902856	903372	517	189	4.19766	1.32152	2.70313	.//_peak_1645
chr21	384499	385947	1449	215.22	4.62393	1.32138	3.07156	.//_peak_1026
chr5	355360	357085	1726	189.35	4.20359	1.32129	2.70958	.//_peak_1411
chr11	23955	26826	2872	190.07	4.19624	1.32116	2.70135	.//_peak_158
chr7	671627	671925	299	188.94	4.07418	1.32113	2.58705	.//_peak_1627
chr7	721474	721841	368	188.93	4.12874	1.32103	2.6384	.//_peak_1632
chr17	91676	94952	3277	241.6	5.16375	1.32079	3.54419	.//_peak_724
chr4	128012	128429	418	188.89	4.07649	1.32074	2.59001	.//_peak_1295
chr14	519122	521718	2597	201.78	4.35057	1.32071	2.83338	.//_peak_453
chr14	304520	305457	938	188.85	4.15067	1.32047	2.66014	.//_peak_420
chr1	1074074	1074533	460	188.84	4.11584	1.32041	2.62752	.//_peak_32
chr22	314365	315145	781	196.46	4.28826	1.32024	2.78254	.//_peak_1047
chr3	1382134	1385121	2988	219.85	4.63793	1.32006	3.07911	.//_peak_1234
chr4	1103610	1104805	1196	188.77	4.13406	1.31993	2.64545	.//_peak_1348
chr8	525034	526122	1089	188.75	4.13199	1.31982	2.64397	.//_peak_1681
chr14	556291	558360	2070	191.16	4.22789	1.31967	2.73523	.//_peak_459
chr14	880796	881220	425	189.82	4.07139	1.31947	2.58672	.//_peak_513
chr17	318154	324403	6250	233.36	5.0185	1.3194	3.42549	.//_peak_766
chr9	1046017	1049472	3456	188.69	4.08464	1.31933	2.60019	.//_peak_1821
chr7	823869	825227	1359	188.67	4.13878	1.31922	2.65127	.//_peak_1639
chr12	304182	304456	275	188.92	4.06625	1.3192	2.58324	.//_peak_320
chr9	864760	865176	417	204.94	4.3343	1.31914	2.81528	.//_peak_1789
chr22	391561	392145	585	368.62	7.62395	1.31889	5.73872	.//_peak_1051
chr14	759713	764436	4724	189.14	4.09233	1.31876	2.60802	.//_peak_496
chr8	818213	818712	500	237.94	5.07065	1.31872	3.46647	.//_peak_1704
chr6	1408665	1409601	937	192.36	4.1273	1.31854	2.63698	.//_peak_1534
chr21	232837	234694	1858	198.71	4.25696	1.31839	2.75281	.//_peak_998
chr1	1747196	1747542	347	199.81	4.24712	1.31836	2.74213	.//_peak_81
chr4	1302113	1303827	1715	188.52	4.0979	1.31817	2.61449	.//_peak_1363
chr14	551748	552261	514	190.23	4.07831	1.31809	2.59785	.//_peak_458
chr20	231926	238773	6848	260.09	5.46432	1.31802	3.81049	.//_peak_951
chr5	1261508	1267708	6201	193.94	4.16878	1.31789	2.67754	.//_peak_1445
chr9	1080179	1080545	367	200.08	4.25601	1.31774	2.75111	.//_peak_1825
chr14	741962	744408	2447	203.1	4.27432	1.31757	2.76395	.//_peak_492
chr17	593910	595752	1843	188.42	4.08547	1.3175	2.60441	.//_peak_795
chr7	1269614	1270366	753	325.89	6.42356	1.3175	4.62969	.//_peak_1660
chr15	8632	9073	442	198.67	4.24507	1.31729	2.74411	.//_peak_541
chr6	501486	502328	843	188.37	4.02429	1.31717	2.54708	.//_peak_1482
chr21	264165	267998	3834	202.99	4.3145	1.31713	2.80357	.//_peak_1004
chr8	722196	724348	2153	188.37	4.05637	1.31713	2.5772	.//_peak_1697
chr18	409167	410065	899	188.35	4.04894	1.31702	2.57055	.//_peak_826
chr3	1374140	1376811	2672	205.78	4.4261	1.31678	2.90561	.//_peak_1232
chr1	1660267	1664973	4707	203.3	4.32994	1.31665	2.81928	.//_peak_66
chr4	170258	172268	2011	188.28	4.047	1.31655	2.56958	.//_peak_1299
chr15	442399	444811	2413	188.25	4.0021	1.31631	2.52764	.//_peak_615
chr15	813539	815509	1971	201.42	4.23916	1.3162	2.73603	.//_peak_657
chr20	419907	427196	7290	326.87	6.76621	1.31618	4.97872	.//_peak_965
chr3	1457483	1460577	3095	188.44	4.02243	1.31617	2.54744	.//_peak_1245
chr7	331414	334222	2809	188.78	4.04074	1.31616	2.56412	.//_peak_1582
chr11	109889	110367	479	188.2	4.01438	1.31594	2.53957	.//_peak_172
chr1	1078464	1081747	3284	188.18	4.04532	1.3158	2.56973	.//_peak_33
chr14	967317	968041	725	188.16	3.97284	1.31568	2.50142	.//_peak_525
chr1	1607854	1608141	288	188.13	4.08762	1.3155	2.60949	.//_peak_59
chr10	907277	909250	1974	188.25	4.07475	1.31537	2.59848	.//_peak_144
chr7	429717	435198	5482	212.21	4.47819	1.31531	2.94867	.//_peak_1596
chr10	442108	442702	595	188.15	4.05023	1.31525	2.57495	.//_peak_110
chr7	339297	347235	7939	190.44	4.0684	1.31511	2.59087	.//_peak_1584
chr21	378493	379173	681	188.06	3.94793	1.31502	2.47915	.//_peak_1025
chr17	372426	376211	3786	232.37	4.82659	1.31498	3.24774	.//_peak_775
chr16	345730	348968	3239	189.44	4.08289	1.31487	2.60643	.//_peak_683
chr6	1134426	1134704	279	188.04	3.98712	1.31485	2.51621	.//_peak_1520
chr4	1350183	1351524	1342	188.17	3.99988	1.31477	2.52831	.//_peak_1366
chr6	1080785	1084692	3908	192.97	4.11486	1.31472	2.6315	.//_peak_1510
chr15	351591	352520	930	188.61	4.03759	1.31455	2.56891	.//_peak_599
chr15	829055	830258	1204	199.37	4.24677	1.31455	2.7482	.//_peak_659
chr3	1462157	1464135	1979	191.2	4.03573	1.31438	2.56061	.//_peak_1246
chr17	296580	298200	1621	224.73	4.5599	1.31432	3.0075	.//_peak_763
chr7	336525	337569	1045	187.96	4.02525	1.31432	2.55345	.//_peak_1583
chr21	155410	157081	1672	195.77	4.12837	1.31422	2.64249	.//_peak_983
chr1	1781731	1787785	6055	264.54	5.55893	1.31397	3.90332	.//_peak_85
chr6	1417871	1419388	1518	231.37	4.44628	1.31395	2.91946	.//_peak_1535
chr17	215595	217957	2363	232.21	4.87922	1.31393	3.30015	.//_peak_745
chr19	361152	363228	2077	187.9	3.99918	1.31381	2.52953	.//_peak_847
chr10	75432	76833	1402	201.69	4.19982	1.31376	2.70099	.//_peak_92
chr17	146831	155430	8600	249.21	5.11779	1.31376	3.50433	.//_peak_734
chr9	514598	514870	273	187.86	3.92216	1.31357	2.4573	.//_peak_1761
chr9	1024870	1027934	3065	201.46	4.35137	1.3132	2.84756	.//_peak_1818
chr9	386713	388122	1410	187.8	3.92267	1.31315	2.45854	.//_peak_1758
chr3	701193	703532	2340	237.02	4.91195	1.31313	3.32622	.//_peak_1163
chr14	258626	264023	5398	190.66	4.05919	1.31309	2.58525	.//_peak_413
chr3	1238711	1239575	865	187.78	3.94139	1.31303	2.47621	.//_peak_1216
chr7	256776	257505	730	222.24	4.51186	1.31272	2.97053	.//_peak_1572
chr12	1031519	1036194	4676	187.73	4.05883	1.31269	2.58881	.//_peak_348
chr7	264804	266500	1697	224	4.52807	1.3126	2.98214	.//_peak_1573
chr2	1231869	1233874	2006	187.71	3.98954	1.31259	2.52256	.//_peak_912
chr9	1174943	1175299	357	187.69	3.90983	1.3124	2.44775	.//_peak_1837
chr1	1020009	1020470	462	187.67	3.92867	1.3123	2.46554	.//_peak_29
chr14	623923	625338	1416	188.62	3.96547	1.3122	2.49984	.//_peak_470
chr14	536774	537723	950	225.69	4.84409	1.31219	3.28066	.//_peak_455
chr7	182220	187891	5672	276.47	5.59963	1.31214	3.92838	.//_peak_1561
chr13	937629	937992	364	187.64	3.94683	1.31209	2.48323	.//_peak_382
chr8	1022840	1026334	3495	199.05	4.15255	1.31209	2.66432	.//_peak_1729
chr11	586894	588636	1743	187.66	3.97788	1.31198	2.51258	.//_peak_258
chr6	284059	284364	306	187.62	3.89179	1.31194	2.43189	.//_peak_1476
chr25	20610	25671	5062	200.64	4.2222	1.31181	2.72612	.//_peak_1097
chr11	445250	448710	3461	188.68	4.0275	1.31174	2.56005	.//_peak_233
chr13	533218	533521	304	187.6	3.91933	1.31169	2.45817	.//_peak_364
chr13	536303	537104	802	187.58	3.97711	1.31163	2.51233	.//_peak_365
chr6	928261	936580	8320	188.58	3.99711	1.31162	2.53038	.//_peak_1501
chr3	1114738	1115209	472	187.79	3.93935	1.31146	2.47718	.//_peak_1201
chr7	225852	227725	1874	265.64	5.17129	1.31146	3.53425	.//_peak_1567
chr2	185944	186191	248	196.22	4.03362	1.31137	2.55638	.//_peak_859
chr10	922866	923912	1047	202.4	4.25492	1.31112	2.75842	.//_peak_146
chr11	377270	381134	3865	191.8	4.00917	1.31097	2.54217	.//_peak_222
chr17	286372	288546	2175	238.97	4.83889	1.31095	3.25733	.//_peak_760
chr1	1592573	1594147	1575	189.73	3.92786	1.31094	2.46556	.//_peak_58
chr9	733681	734460	780	187.47	3.99613	1.31092	2.53174	.//_peak_1773
chr15	418356	418669	314	187.46	3.91307	1.3108	2.45353	.//_peak_611
chr4	3874	4875	1002	191.84	4.02189	1.31078	2.55096	.//_peak_1272
chr11	687442	689385	1944	234.14	4.89935	1.31076	3.32467	.//_peak_274
chr14	620280	622581	2302	193.25	4.14659	1.31056	2.6676	.//_peak_469
chr21	326898	328350	1453	191.83	3.94583	1.31055	2.48007	.//_peak_1018
chr3	1335459	1338203	2745	197.07	4.19696	1.31053	2.71177	.//_peak_1224
chr20	456585	461144	4560	235.76	4.82435	1.31037	3.24861	.//_peak_970
chr12	95696	98196	2501	188.39	3.96243	1.31027	2.5004	.//_peak_314
chr8	630111	630421	311	222.32	4.54263	1.31015	2.99952	.//_peak_1692
chr6	1123570	1124059	490	189.82	3.95052	1.31005	2.48788	.//_peak_1519
chr15	353615	355513	1899	195.35	4.03559	1.30999	2.56343	.//_peak_600
chr8	841387	843076	1690	240.24	4.83783	1.30993	3.25666	.//_peak_1709
chr14	283693	284225	533	187.37	3.88231	1.30986	2.42643	.//_peak_417
chr17	378139	379879	1741	228.08	4.66766	1.30984	3.11176	.//_peak_776
chr10	562107	564252	2146	187.33	3.96599	1.30969	2.50599	.//_peak_123
chr7	1080769	1081739	971	187.29	3.93192	1.30963	2.47348	.//_peak_1647
chr11	544630	545667	1038	216.85	4.45561	1.30955	2.92673	.//_peak_250
chr9	962054	962801	748	189.49	4.06179	1.30941	2.59596	.//_peak_1808
chr9	939316	940895	1580	188.11	3.97639	1.30917	2.51567	.//_peak_1804
chr2	1094998	1095566	569	187.23	3.87411	1.30912	2.41977	.//_peak_902
chr4	608784	609181	398	187.21	3.86383	1.30907	2.41032	.//_peak_1320
chr11	289922	290578	657	223.68	4.48596	1.30892	2.94839	.//_peak_206
chr20	402955	407066	4112	320.76	6.11905	1.30891	4.37129	.//_peak_962
chr7	504523	504806	284	187.48	3.86867	1.30874	2.41528	.//_peak_1607
chr23	16584	17512	929	191.25	3.96996	1.30844	2.50728	.//_peak_1064
chr11	822505	823688	1184	188.92	3.89253	1.3084	2.4375	.//_peak_299
chr4	1046071	1049537	3467	187.11	3.93823	1.3084	2.48194	.//_peak_1341
chr9	1040187	1044096	3910	188.46	3.9072	1.30819	2.45177	.//_peak_1820
chr17	232619	235108	2490	246.33	4.88702	1.30813	3.29947	.//_peak_749
chr7	508973	512085	3113	194.47	4.07562	1.30797	2.60399	.//_peak_1609
chr15	159264	160270	1007	189.96	4.03597	1.30782	2.57388	.//_peak_563
chr10	104448	105042	595	189.96	3.86438	1.30777	2.41031	.//_peak_94
chr4	1080263	1080757	495	206.1	4.09678	1.30772	2.60925	.//_peak_1344
chr12	891277	892933	1657	187	3.88454	1.30762	2.43221	.//_peak_342
chr3	583874	584869	996	189.15	3.90683	1.3074	2.45222	.//_peak_1148
chr14	490475	492039	1565	190.97	3.95671	1.3073	2.49814	.//_peak_447
chr8	432745	433154	410	186.92	3.8127	1.30707	2.36577	.//_peak_1674
chr4	1092135	1094100	1966	186.91	3.90445	1.30702	2.4521	.//_peak_1345
chr14	802853	805010	2158	188.86	3.87499	1.30695	2.42305	.//_peak_503
chr2	1055508	1057441	1934	186.9	3.83236	1.30692	2.38456	.//_peak_898
chr1	467874	468641	768	247.25	4.85758	1.3069	3.27034	.//_peak_8
chr15	265514	267582	2069	198.05	4.04615	1.30676	2.57435	.//_peak_582
chr15	151557	156923	5367	187.75	3.88221	1.30659	2.43167	.//_peak_562
chr3	970570	970918	349	187.22	3.81424	1.30645	2.3689	.//_peak_1188
chr12	589989	590343	355	193.22	3.89217	1.30643	2.43627	.//_peak_334
chr7	576690	577788	1099	193.87	3.91789	1.30643	2.4577	.//_peak_1622
chr21	373908	375499	1592	193.91	3.94495	1.30626	2.48575	.//_peak_1023
chr5	366009	366532	524	186.79	3.82225	1.30619	2.37596	.//_peak_1412
chr6	1464088	1466977	2890	187.24	3.85734	1.30604	2.40912	.//_peak_1540
chr9	922148	923828	1681	187.87	3.9101	1.30588	2.45865	.//_peak_1801
chr15	552587	554159	1573	189.4	3.85812	1.30585	2.40885	.//_peak_632
chr11	292794	293364	571	237.2	4.64231	1.30556	3.08349	.//_peak_207
chr18	149267	155070	5804	187.15	3.83564	1.30554	2.38989	.//_peak_809
chr11	619119	619439	321	186.71	3.78273	1.3055	2.34049	.//_peak_264
chr21	408121	412975	4855	195.75	3.96095	1.30537	2.49951	.//_peak_1029
chr15	83998	85723	1726	191.71	3.90182	1.30526	2.4496	.//_peak_553
chr9	1192692	1197916	5225	198.94	4.03624	1.30526	2.56632	.//_peak_1841
chr20	309494	310424	931	186.65	3.80569	1.30518	2.36232	.//_peak_961
chr8	846341	846883	543	233.85	4.52871	1.30518	2.98146	.//_peak_1710
chr9	457813	458102	290	186.64	3.80353	1.3051	2.36035	.//_peak_1760
chr14	714602	715607	1006	186.81	3.7884	1.30503	2.34659	.//_peak_487
chr14	394031	394817	787	187.29	3.86116	1.30501	2.41531	.//_peak_436
chr4	1297935	1299125	1191	186.65	3.78354	1.30498	2.34197	.//_peak_1361
chr1	1719938	1720835	898	207	4.08741	1.30492	2.60322	.//_peak_73
chr4	9563	11598	2036	200.14	4.01202	1.30484	2.54268	.//_peak_1273
chr14	1009516	1010084	569	188.83	3.8148	1.30477	2.37058	.//_peak_534
chr2	270399	272111	1713	186.59	3.8483	1.30475	2.40332	.//_peak_865
chr2	387629	387930	302	186.56	3.77501	1.30453	2.3346	.//_peak_870
chr9	318033	320237	2205	186.55	3.80326	1.30446	2.36146	.//_peak_1753
chr2	148696	148994	299	186.53	3.74631	1.30435	2.30818	.//_peak_857
chr7	197844	198827	984	288.68	5.40656	1.30432	3.74097	.//_peak_1562
chr3	1484142	1485679	1538	194.33	3.94155	1.30379	2.48481	.//_peak_1251
chr31	39815	41530	1716	186.5	3.76945	1.30378	2.33072	.//_peak_1262
chr6	807887	808998	1112	186.59	3.74898	1.30366	2.31184	.//_peak_1494
chr14	294209	294885	677	186.43	3.82244	1.30359	2.38091	.//_peak_418
chr10	475386	477461	2076	189.86	3.83586	1.30358	2.39013	.//_peak_117
chr7	1120389	1121401	1013	186.42	3.74981	1.30358	2.31267	.//_peak_1650
chr4	1132539	1134662	2124	194.99	3.91529	1.30352	2.45893	.//_peak_1352
chr14	367619	367917	299	211.49	4.13656	1.30348	2.64535	.//_peak_431
chr12	56621	58598	1978	186.4	3.80644	1.30343	2.36632	.//_peak_310
chr6	816339	817022	684	186.39	3.86629	1.3034	2.42267	.//_peak_1495
chr3	816565	817974	1410	187.09	3.78837	1.30339	2.3488	.//_peak_1173
chr10	480396	482671	2276	239.82	5.10698	1.30315	3.53524	.//_peak_118
chr14	597095	598548	1454	186.4	3.76961	1.30307	2.33227	.//_peak_466
chr3	973882	975386	1505	186.32	3.79407	1.30281	2.35553	.//_peak_1189
chr3	714637	716189	1553	186.31	3.74981	1.30279	2.31394	.//_peak_1164
chr11	223922	224795	874	190.43	3.79429	1.30263	2.35527	.//_peak_195
chr14	842458	849894	7437	187.33	3.81174	1.30262	2.3725	.//_peak_510
chr21	270809	271778	970	203.77	4.07581	1.30241	2.60236	.//_peak_1005
chr9	529012	530149	1138	186.24	3.77422	1.30237	2.33753	.//_peak_1762
chr14	731973	735298	3326	223.74	4.5239	1.30229	2.99784	.//_peak_490
chr16	644473	644723	251	186.23	3.82398	1.30229	2.38462	.//_peak_701
chr2	1024380	1025548	1169	186.22	3.7458	1.30221	2.31131	.//_peak_895
chr14	220361	220617	257	194.03	3.85642	1.30207	2.40766	.//_peak_406
chr11	787993	790261	2269	186.4	3.79057	1.30199	2.354	.//_peak_290
chr21	209249	210274	1026	189.1	3.76126	1.30198	2.32617	.//_peak_994
chr15	715846	716922	1077	199.15	3.94552	1.30188	2.48496	.//_peak_643
chr3	28915	29235	321	186.87	3.70349	1.30182	2.27314	.//_peak_1117
chr6	408028	409042	1015	186.12	3.74142	1.30148	2.30835	.//_peak_1478
chr17	39254	39824	571	224.11	4.41884	1.3014	2.89775	.//_peak_716
chr2	175965	176221	257	186.1	3.73146	1.30139	2.29892	.//_peak_858
chr15	1740	2338	599	188.26	3.78378	1.30126	2.34772	.//_peak_539
chr2	383475	385600	2126	186.08	3.75361	1.30114	2.32057	.//_peak_869
chr4	15377	16031	655	186.02	3.69894	1.30079	2.26968	.//_peak_1275
chr1	1715294	1716201	908	196.89	3.91525	1.30074	2.46261	.//_peak_71
chr11	1072933	1073577	645	186.03	3.68466	1.30072	2.25657	.//_peak_307
chr11	455301	457022	1722	186.15	3.7317	1.30068	2.30207	.//_peak_234
chr14	314696	320271	5576	192.75	3.8468	1.30045	2.40376	.//_peak_422
chr12	245140	245602	463	190.77	3.74848	1.30035	2.31373	.//_peak_319
chr14	78905	81604	2700	185.97	3.69348	1.30026	2.26553	.//_peak_394
chr15	183022	183414	393	185.94	3.75527	1.30026	2.32325	.//_peak_568
chr14	631633	635511	3879	189.88	3.82766	1.30022	2.39044	.//_peak_471
chr11	318408	327717	9310	187.24	3.74841	1.30019	2.31647	.//_peak_214
chr6	1487029	1489792	2764	319.05	5.82836	1.30016	4.11246	.//_peak_1543
chr11	599195	599441	247	202.15	3.91415	1.29994	2.45454	.//_peak_262
chr4	635387	636594	1208	185.89	3.72541	1.29987	2.29633	.//_peak_1323
chr15	833729	836831	3103	189.41	3.79533	1.29964	2.35913	.//_peak_660
chr2	798945	799914	970	185.8	3.70521	1.29929	2.27818	.//_peak_887
chr3	1280998	1281645	648	212.22	4.09558	1.29917	2.61224	.//_peak_1220
chr11	237814	238868	1055	198.61	3.85395	1.29911	2.4058	.//_peak_199
chr15	767300	767730	431	205.56	4.01095	1.29874	2.54289	.//_peak_649
chr12	1026309	1028064	1756	185.72	3.67736	1.29871	2.25291	.//_peak_347
chr3	1320574	1321709	1136	185.77	3.67841	1.29868	2.25421	.//_peak_1223
chr3	1275168	1276375	1208	185.71	3.67496	1.29862	2.25099	.//_peak_1219
chr16	219883	220995	1113	188.44	3.83736	1.29856	2.40108	.//_peak_675
chr22	263946	265502	1557	186.19	3.68717	1.29833	2.26282	.//_peak_1044
chr15	706040	706833	794	196.72	3.82401	1.29807	2.38026	.//_peak_641
chr2	32194	32894	701	185.62	3.63967	1.29803	2.21885	.//_peak_853
chr14	405020	406540	1521	186.55	3.73675	1.29779	2.3099	.//_peak_438
chr18	365056	365321	266	185.58	3.64044	1.29771	2.21994	.//_peak_822
chr14	687924	689596	1673	186.18	3.69444	1.29763	2.27109	.//_peak_482
chr11	258130	258569	440	202.89	3.87264	1.29761	2.41961	.//_peak_203
chr9	981502	985755	4254	187.28	3.737	1.29743	2.3107	.//_peak_1812
chr1	1324252	1324511	260	185.53	3.61992	1.29741	2.20148	.//_peak_44
chr14	360837	363108	2272	204.88	3.99186	1.29734	2.52932	.//_peak_430
chr14	737138	739232	2095	207.98	4.05132	1.29726	2.58055	.//_peak_491
chr7	479641	481421	1781	210.34	4.17284	1.29709	2.69175	.//_peak_1602
chr10	910457	912934	2478	186.63	3.65828	1.29692	2.23799	.//_peak_145
chr14	550010	550656	647	185.64	3.69295	1.2969	2.2708	.//_peak_457
chr14	889332	893783	4452	228.83	4.42393	1.29661	2.90848	.//_peak_514
chr11	311920	313078	1159	185.44	3.64332	1.29653	2.22517	.//_peak_211
chr9	1148029	1150739	2711	190.41	3.7387	1.2965	2.31201	.//_peak_1832
chr5	1361262	1361568	307	185.66	3.62393	1.29643	2.20754	.//_peak_1452
chr15	799264	804139	4876	195.49	3.86296	1.29628	2.42343	.//_peak_655
chr6	1145881	1147638	1758	185.37	3.64028	1.29626	2.22231	.//_peak_1521
chr17	224987	227061	2075	253.03	4.69887	1.29624	3.13404	.//_peak_747
chr6	1339369	1342474	3106	191.02	3.72954	1.29618	2.29967	.//_peak_1531
chr10	1085894	1086265	372	185.34	3.6118	1.2961	2.19592	.//_peak_151
chr8	848705	852982	4278	232.64	4.51581	1.29605	2.98955	.//_peak_1711
chr15	319080	320435	1356	186.54	3.68408	1.29603	2.26317	.//_peak_591
chr25	64240	65276	1037	215.38	4.03688	1.29591	2.56351	.//_peak_1098
chr7	290266	290869	604	186.88	3.67601	1.29585	2.25661	.//_peak_1579
chr11	530814	531771	958	190.48	3.72568	1.29578	2.30088	.//_peak_246
chr3	1441565	1443663	2099	185.62	3.6757	1.29578	2.25663	.//_peak_1244
chr5	905028	905455	428	189.43	3.68931	1.29578	2.26611	.//_peak_1431
chr3	1093938	1094372	435	185.3	3.62202	1.29572	2.2063	.//_peak_1198
chr11	693144	694462	1319	212.28	4.08285	1.29571	2.6074	.//_peak_276
chr16	368472	372797	4326	192.64	3.84162	1.29566	2.40233	.//_peak_684
chr20	57904	59640	1737	222.63	4.23855	1.29557	2.74033	.//_peak_926
chr6	276608	278590	1983	185.27	3.69879	1.29557	2.27845	.//_peak_1475
chr18	570365	570807	443	185.25	3.59523	1.29548	2.18144	.//_peak_838
chr16	877909	878164	256	185.25	3.62287	1.29542	2.20734	.//_peak_712
chr9	155532	155848	317	185.24	3.57282	1.2954	2.16083	.//_peak_1745
chr21	341599	344061	2463	215.71	4.06595	1.29539	2.58764	.//_peak_1021
chr22	450540	453117	2578	253.1	4.99994	1.29524	3.41743	.//_peak_1058
chr4	1320022	1320568	547	185.54	3.60249	1.29523	2.18865	.//_peak_1365
chr11	534474	536096	1623	185.22	3.604	1.29517	2.19021	.//_peak_247
chr3	439079	441105	2027	185.2	3.59951	1.2951	2.18616	.//_peak_1134
chr9	105824	108067	2244	185.2	3.61839	1.2951	2.20375	.//_peak_1740
chr15	302623	304561	1939	206.79	3.98196	1.29495	2.5205	.//_peak_587
chr3	1249795	1251387	1593	185.16	3.61069	1.29481	2.19693	.//_peak_1218
chr4	1444373	1445289	917	221.48	4.18969	1.29477	2.69654	.//_peak_1375
chr17	204314	204697	384	220.43	4.12104	1.29475	2.63306	.//_peak_742
chr9	1167559	1168870	1312	185.42	3.65178	1.29462	2.23618	.//_peak_1836
chr7	524323	524646	324	191.6	3.6506	1.29411	2.23086	.//_peak_1610
chr3	1091676	1092255	580	185.04	3.5962	1.29402	2.18478	.//_peak_1197
chr17	486678	490120	3443	186.13	3.62032	1.29394	2.20676	.//_peak_788
chr20	90002	97155	7154	237.9	4.48031	1.29385	2.95217	.//_peak_930
chr3	1158810	1159829	1020	184.97	3.55713	1.29352	2.14908	.//_peak_1206
chr11	520132	522666	2535	186.2	3.60745	1.29351	2.19647	.//_peak_244
chr8	1038179	1039210	1032	250.99	4.55323	1.29345	3.00388	.//_peak_1731
chr11	193242	196232	2991	199.33	3.80655	1.29334	2.36856	.//_peak_188
chr14	67717	69427	1711	184.94	3.59585	1.29331	2.18575	.//_peak_393
chr3	689802	691134	1333	185.07	3.63405	1.29327	2.22175	.//_peak_1162
chr9	687831	688206	376	184.93	3.5744	1.29322	2.16566	.//_peak_1770
chr23	236614	239183	2570	189.98	3.72548	1.29321	2.30554	.//_peak_1090
chr9	129066	129704	639	184.9	3.57408	1.293	2.16578	.//_peak_1742
chr10	288164	288835	672	202.87	3.87959	1.29295	2.42904	.//_peak_103
chr7	573263	573995	733	184.89	3.59696	1.29292	2.18725	.//_peak_1620
chr12	131508	133418	1911	184.88	3.59481	1.29288	2.18537	.//_peak_315
chr16	246563	247053	491	187.05	3.58915	1.29285	2.17972	.//_peak_677
chr6	1193536	1193932	397	184.87	3.56143	1.29279	2.1543	.//_peak_1524
chr1	813937	815072	1136	184.99	3.54134	1.29278	2.13573	.//_peak_22
chr4	1117960	1122708	4749	185.48	3.62189	1.29278	2.21098	.//_peak_1350
chr15	332654	333256	603	184.86	3.53191	1.29276	2.12684	.//_peak_595
chr9	908243	908623	381	229.29	4.21852	1.29266	2.71732	.//_peak_1796
chr21	368703	372127	3425	224.83	4.16147	1.29262	2.66947	.//_peak_1022
chr17	248992	250277	1286	230.65	4.44731	1.29234	2.93357	.//_peak_754
chr11	38337	40771	2435	184.9	3.64106	1.29232	2.22993	.//_peak_159
chr3	1540970	1541292	323	184.77	3.58211	1.29208	2.17476	.//_peak_1255
chr5	1470941	1473683	2743	184.75	3.57643	1.29198	2.16995	.//_peak_1455
chr7	723312	725363	2052	184.75	3.56167	1.29197	2.15597	.//_peak_1633
chr8	447226	449141	1916	184.74	3.55471	1.29189	2.14944	.//_peak_1676
chr18	551999	552341	343	188.07	3.58439	1.29181	2.17566	.//_peak_836
chr6	35068	36321	1254	184.72	3.57758	1.29176	2.17094	.//_peak_1470
chr11	796791	798292	1502	185.22	3.55274	1.29167	2.14878	.//_peak_292
chr11	219733	220555	823	185.09	3.58155	1.29165	2.17594	.//_peak_193
chr15	306027	308233	2207	199.57	3.78169	1.29155	2.34808	.//_peak_588
chr18	142876	145670	2795	184.69	3.54943	1.29154	2.14513	.//_peak_808
chr1	816571	819825	3255	187.04	3.62514	1.29149	2.21325	.//_peak_23
chr1	810900	811618	719	184.67	3.54927	1.29144	2.14517	.//_peak_21
chr8	585909	587630	1722	184.67	3.56795	1.29141	2.16279	.//_peak_1683
chr18	608965	611660	2696	184.67	3.546	1.2914	2.14211	.//_peak_839
chr16	732513	733885	1373	189.4	3.59459	1.29129	2.18374	.//_peak_705
chr8	194735	195116	382	184.63	3.5605	1.2911	2.15608	.//_peak_1664
chr11	408439	408879	441	184.92	3.50218	1.29087	2.10261	.//_peak_226
chr10	192022	192304	283	184.57	3.50321	1.29073	2.10324	.//_peak_96
chr6	1446772	1450706	3935	190.53	3.62862	1.29071	2.21497	.//_peak_1538
chr1	1530437	1535472	5036	185.01	3.59047	1.29065	2.18552	.//_peak_53
chr3	628145	629210	1066	226.1	4.20567	1.29065	2.71323	.//_peak_1153
chr11	84124	86247	2124	192.11	3.63563	1.29063	2.22152	.//_peak_167
chr15	721326	721863	538	184.89	3.53101	1.29062	2.1293	.//_peak_644
chr3	42394	43894	1501	184.54	3.52205	1.2905	2.12123	.//_peak_1121
chr13	720014	720272	259	184.53	3.53458	1.29043	2.13292	.//_peak_377
chr21	244271	245594	1324	188.27	3.58062	1.29033	2.17376	.//_peak_1001
chr2	668275	669917	1643	184.5	3.55683	1.29022	2.1544	.//_peak_883
chr4	1105968	1106230	263	184.5	3.5076	1.2902	2.10816	.//_peak_1349
chr17	783358	785519	2162	201.2	3.69196	1.29012	2.26897	.//_peak_802
chr16	433478	435680	2203	184.48	3.50903	1.29008	2.10981	.//_peak_687
chr14	128702	132573	3872	184.57	3.58357	1.29005	2.18008	.//_peak_396
chr18	161751	162433	683	184.46	3.50073	1.28998	2.10216	.//_peak_811
chr4	1452286	1452793	508	190.56	3.56429	1.28977	2.15858	.//_peak_1376
chr14	814679	814999	321	187.81	3.52803	1.28962	2.12736	.//_peak_505
chr7	545232	548195	2964	192.3	3.62483	1.28958	2.21148	.//_peak_1615
chr3	1119624	1121816	2193	184.4	3.50409	1.28955	2.10598	.//_peak_1202
chr3	229908	230267	360	184.4	3.46552	1.28951	2.07031	.//_peak_1130
chr18	487401	487889	489	184.39	3.48703	1.28946	2.09021	.//_peak_832
chr11	402396	404591	2196	184.39	3.59655	1.28945	2.19301	.//_peak_225
chr4	1580233	1582461	2229	186.98	3.56562	1.28944	2.16227	.//_peak_1383
chr3	1534427	1534807	381	184.38	3.50649	1.28936	2.10854	.//_peak_1254
chr14	326080	327974	1895	188.76	3.62334	1.2893	2.21568	.//_peak_424
chr8	726732	728097	1366	188.37	3.54115	1.28919	2.13811	.//_peak_1698
chr15	822153	822514	362	192.97	3.60452	1.28916	2.19244	.//_peak_658
chr17	756696	756955	260	184.34	3.4838	1.28913	2.08775	.//_peak_800
chr10	444477	446384	1908	184.33	3.52632	1.28908	2.12755	.//_peak_111
chr17	505050	506425	1376	184.64	3.51868	1.28907	2.12052	.//_peak_791
chr4	342059	343932	1874	186.49	3.5781	1.28904	2.17498	.//_peak_1305
chr9	1215132	1216897	1766	230.51	4.08335	1.28889	2.60148	.//_peak_1843
chr3	123573	124505	933	184.3	3.49659	1.28885	2.10011	.//_peak_1124
chr20	33924	34221	298	223	4.0936	1.28873	2.61495	.//_peak_920
chr15	71406	73378	1973	186.13	3.54965	1.28872	2.14851	.//_peak_550
chr20	451569	452305	737	257.26	4.57553	1.28862	3.02632	.//_peak_969
chr7	1092496	1093304	809	184.27	3.49553	1.28861	2.0996	.//_peak_1648
chr9	116634	117210	577	184.26	3.47304	1.28855	2.07868	.//_peak_1741
chr12	988466	990763	2298	184.25	3.51215	1.2885	2.11513	.//_peak_345
chr21	183099	184918	1820	211.19	3.91504	1.28846	2.46235	.//_peak_989
chr9	1015528	1016520	993	201.83	3.81583	1.28841	2.38179	.//_peak_1816
chr1	1652920	1655687	2768	236.9	4.41277	1.2884	2.90085	.//_peak_65
chr15	228493	231987	3495	191.96	3.64971	1.28833	2.23759	.//_peak_575
chr6	1219852	1220399	548	184.21	3.46967	1.28819	2.07606	.//_peak_1525
chr3	685954	688520	2567	185.21	3.50211	1.28813	2.10601	.//_peak_1161
chr11	547735	551627	3893	186.8	3.56233	1.28812	2.16244	.//_peak_251
chr14	785322	785665	344	215.82	3.98373	1.28806	2.52239	.//_peak_500
chr8	826213	828736	2524	237.84	4.39287	1.28788	2.87995	.//_peak_1706
chr16	342026	343173	1148	184.16	3.45898	1.28785	2.06664	.//_peak_682
chr14	570727	572705	1979	184.38	3.56	1.28762	2.16211	.//_peak_461
chr5	1354550	1355049	500	188.51	3.55679	1.2875	2.15603	.//_peak_1451
chr11	820203	820895	693	184.1	3.51816	1.28748	2.12255	.//_peak_298
chr5	1159355	1160088	734	184.1	3.4643	1.28748	2.07217	.//_peak_1439
chr22	387517	388979	1463	373.96	6.24207	1.28742	4.4713	.//_peak_1050
chr11	236291	236732	442	186.93	3.52462	1.2874	2.1295	.//_peak_198
chr7	861350	862769	1420	184.08	3.43897	1.28733	2.04891	.//_peak_1641
chr14	969300	970192	893	184.11	3.48127	1.28731	2.08831	.//_peak_526
chr4	1272111	1273909	1799	184.14	3.47979	1.28728	2.08703	.//_peak_1357
chr5	307554	308354	801	188.74	3.54098	1.28725	2.14212	.//_peak_1404
chr15	359443	360079	637	189.16	3.53869	1.28717	2.14025	.//_peak_602
chr7	140802	144245	3444	252.75	4.5933	1.2871	3.05136	.//_peak_1555
chr3	1062343	1062620	278	184.04	3.43094	1.28705	2.04185	.//_peak_1195
chr11	781408	782804	1397	200.95	3.73106	1.28704	2.30491	.//_peak_288
chr15	219117	221495	2379	185.31	3.4915	1.28701	2.09837	.//_peak_573
chr8	866729	867560	832	190.06	3.55846	1.287	2.15697	.//_peak_1713
chr1	341484	342205	722	184.09	3.44401	1.28695	2.05411	.//_peak_7
chr14	1025572	1027571	2000	205.63	3.75798	1.28673	2.32503	.//_peak_537
chr8	401054	402251	1198	183.99	3.50115	1.2867	2.10803	.//_peak_1673
chr6	601603	601899	297	183.98	3.45597	1.28663	2.06567	.//_peak_1489
chr11	44972	45230	259	185.05	3.46691	1.28653	2.07585	.//_peak_160
chr7	200168	202898	2731	279.76	5.4348	1.28649	3.84136	.//_peak_1563
chr10	87515	88154	640	183.96	3.43763	1.28648	2.04887	.//_peak_93
chr15	288096	288920	825	235.18	4.1916	1.28648	2.69536	.//_peak_584
chr3	148768	149602	835	183.92	3.44941	1.28622	2.06036	.//_peak_1127
chr14	587545	589344	1800	185.13	3.47634	1.2862	2.08576	.//_peak_464
chr13	1071779	1072642	864	183.91	3.43938	1.28614	2.05107	.//_peak_387
chr15	79475	81292	1818	189.01	3.5028	1.28596	2.10756	.//_peak_552
chr10	42055	42667	613	215.38	4.02614	1.28593	2.56437	.//_peak_90
chr13	391547	392984	1438	183.87	3.45662	1.28584	2.06753	.//_peak_360
chr3	146110	146366	257	183.86	3.42594	1.28577	2.03914	.//_peak_1126
chr4	27987	28478	492	184.19	3.4485	1.28572	2.06031	.//_peak_1276
chr20	37188	38631	1444	219.37	3.96395	1.28558	2.50261	.//_peak_921
chr7	272220	272479	260	183.82	3.42419	1.2855	2.03789	.//_peak_1575
chr3	776186	776432	247	183.81	3.42278	1.28542	2.03685	.//_peak_1168
chr4	1161297	1161668	372	200.94	3.7425	1.28541	2.31678	.//_peak_1356
chr23	67772	70394	2623	201.74	3.68326	1.28521	2.26182	.//_peak_1073
chr25	70632	71254	623	298.84	5.0531	1.28521	3.43399	.//_peak_1100
chr4	1421050	1421857	808	184.77	3.44953	1.2852	2.06202	.//_peak_1374
chr14	210368	211657	1290	207.61	3.79764	1.2851	2.36073	.//_peak_405
chr7	277280	277935	656	183.77	3.41952	1.28506	2.03435	.//_peak_1576
chr9	1112381	1115796	3416	191.41	3.56153	1.285	2.16065	.//_peak_1828
chr14	466673	467469	797	195.23	3.5671	1.28485	2.16108	.//_peak_442
chr3	1109669	1112856	3188	183.67	3.42593	1.28436	2.04141	.//_peak_1200
chr2	253471	255179	1709	273.8	4.88398	1.28407	3.30753	.//_peak_863
chr13	524962	525864	903	183.61	3.40244	1.28402	2.02007	.//_peak_362
chr3	38609	39150	542	191.29	3.47933	1.28382	2.08596	.//_peak_1119
chr16	581891	582281	391	183.58	3.4001	1.2838	2.0181	.//_peak_695
chr4	545780	547585	1806	183.56	3.39856	1.28368	2.01714	.//_peak_1314
chr3	1246972	1248454	1483	183.55	3.44204	1.28355	2.05817	.//_peak_1217
chr14	756769	758663	1895	183.51	3.41656	1.28335	2.03434	.//_peak_495
chr10	45164	46627	1464	184.97	3.42789	1.28333	2.04391	.//_peak_91
chr9	901939	903782	1844	195.83	3.55976	1.28322	2.15778	.//_peak_1795
chr21	400844	404670	3827	189.16	3.47367	1.28319	2.0835	.//_peak_1028
chr15	274244	276746	2503	197.7	3.6139	1.2831	2.20609	.//_peak_583
chr12	598072	600599	2528	183.76	3.39776	1.28302	2.0173	.//_peak_335
chr7	458038	459031	994	183.67	3.40422	1.28298	2.02357	.//_peak_1599
chr11	316884	317404	521	183.65	3.39615	1.28294	2.01649	.//_peak_213
chr3	672570	673548	979	185.9	3.4298	1.28291	2.04566	.//_peak_1159
chr4	1276409	1276929	521	183.41	3.36514	1.28265	1.98748	.//_peak_1358
chr10	861294	861580	287	183.4	3.35949	1.28257	1.98233	.//_peak_142
chr14	718421	720656	2236	199.12	3.6053	1.28255	2.19652	.//_peak_488
chr23	149320	150617	1298	200.16	3.66734	1.28246	2.25362	.//_peak_1081
chr21	180758	181262	505	225.51	3.98005	1.28235	2.5159	.//_peak_988
chr3	618320	619902	1583	213.04	3.8235	1.28228	2.38437	.//_peak_1151
chr10	946444	948568	2125	183.35	3.41184	1.28226	2.03162	.//_peak_148
chr18	646564	646829	266	183.35	3.35097	1.28223	1.97505	.//_peak_840
chr20	167418	172285	4868	242.06	4.25998	1.28211	2.75996	.//_peak_942
chr15	162325	163614	1290	184.33	3.38764	1.28205	2.0091	.//_peak_564
chr11	211094	212382	1289	184.73	3.37343	1.28202	1.99548	.//_peak_192
chr3	1419227	1425720	6494	203.59	3.68111	1.28197	2.26212	.//_peak_1239
chr12	635573	636645	1073	183.96	3.35361	1.28191	1.97783	.//_peak_338
chr14	239104	239549	446	183.3	3.36133	1.28191	1.98499	.//_peak_408
chr15	215569	217023	1455	183.29	3.38574	1.28179	2.00814	.//_peak_572
chr15	753114	754720	1607	199.19	3.57827	1.28176	2.17231	.//_peak_648
chr6	1479865	1482139	2275	304.24	5.1516	1.2817	3.53044	.//_peak_1542
chr4	1150773	1152462	1690	184.13	3.36989	1.28166	1.99309	.//_peak_1354
chr17	239471	242026	2556	229.09	4.29451	1.28163	2.81538	.//_peak_751
chr21	289225	290535	1311	195.22	3.53163	1.28156	2.13381	.//_peak_1009
chr15	356627	357264	638	185.15	3.38343	1.28147	2.0054	.//_peak_601
chr15	126619	129724	3106	183.7	3.39837	1.28146	2.0204	.//_peak_559
chr2	1250582	1252357	1776	183.23	3.33555	1.2814	1.96196	.//_peak_914
chr22	398806	406179	7374	417.84	6.83863	1.28133	5.02363	.//_peak_1053
chr10	399929	401031	1103	183.2	3.36574	1.28117	1.9905	.//_peak_109
chr17	707588	708844	1257	195.92	3.57795	1.281	2.17479	.//_peak_798
chr9	1134791	1136730	1940	183.54	3.35148	1.281	1.97777	.//_peak_1831
chr14	670496	671335	840	186.27	3.3754	1.28083	2.00051	.//_peak_478
chr20	255177	255487	311	235.92	4.04474	1.28083	2.56606	.//_peak_954
chr12	1020121	1021339	1219	183.11	3.34289	1.28059	1.97003	.//_peak_346
chr1	887194	887918	725	183.06	3.33359	1.28018	1.96201	.//_peak_25
chr15	309967	314344	4378	184.75	3.37261	1.28014	1.99856	.//_peak_589
chr9	84777	88654	3878	183.03	3.35217	1.28004	1.97959	.//_peak_1739
chr14	829785	830977	1193	184.68	3.34107	1.27996	1.97166	.//_peak_508
chr8	588703	590594	1892	185.4	3.36327	1.27996	1.9888	.//_peak_1684
chr7	114303	115100	798	291.74	4.85529	1.27987	3.26495	.//_peak_1551
chr21	285293	286021	729	185.43	3.37849	1.27984	2.00728	.//_peak_1008
chr23	54939	56354	1416	204.12	3.69559	1.2796	2.27894	.//_peak_1071
chr12	323487	325274	1788	182.96	3.3298	1.27952	1.95954	.//_peak_321
chr16	532659	534052	1394	182.94	3.3184	1.27937	1.94915	.//_peak_694
chr20	224935	226105	1171	250.95	4.28269	1.27932	2.77489	.//_peak_950
chr10	450444	452473	2030	182.93	3.34706	1.2793	1.97597	.//_peak_113
chr10	354364	355240	877	185.31	3.35341	1.27918	1.98027	.//_peak_106
chr4	993413	994706	1294	182.91	3.35923	1.27916	1.98768	.//_peak_1336
chr13	626546	628666	2121	183.61	3.3263	1.27904	1.95701	.//_peak_369
chr9	1123991	1124353	363	182.88	3.31436	1.27899	1.94588	.//_peak_1830
chr20	449747	450290	544	246.82	4.24286	1.27895	2.74311	.//_peak_968
chr6	1035256	1036614	1359	182.92	3.33207	1.27894	1.96258	.//_peak_1507
chr14	680889	681157	269	183.51	3.29453	1.27882	1.92844	.//_peak_481
chr6	1160563	1164023	3461	182.86	3.32636	1.27878	1.95757	.//_peak_1522
chr4	236319	236974	656	182.84	3.34667	1.27869	1.97648	.//_peak_1301
chr11	67514	69108	1595	194.97	3.49253	1.27856	2.10288	.//_peak_163
chr16	752652	753128	477	209.78	3.65063	1.27855	2.23161	.//_peak_707
chr14	987432	988588	1157	202.84	3.57821	1.27854	2.17268	.//_peak_530
chr3	905291	907261	1971	189.18	3.40282	1.2785	2.02455	.//_peak_1178
chr21	192012	193744	1733	196.8	3.49145	1.27836	2.09948	.//_peak_991
chr14	696083	697683	1601	184.31	3.31973	1.27824	1.9512	.//_peak_483
chr9	349922	353141	3220	182.77	3.34772	1.27819	1.97853	.//_peak_1755
chr1	1092970	1094379	1410	182.76	3.28438	1.27809	1.91949	.//_peak_35
chr9	206236	209461	3226	182.75	3.31525	1.27804	1.94821	.//_peak_1749
chr20	173510	178402	4893	233.33	4.08163	1.2777	2.60988	.//_peak_943
chr8	185467	186424	958	182.69	3.28012	1.27764	1.91617	.//_peak_1663
chr8	961205	965643	4439	344.43	5.63263	1.27762	3.95634	.//_peak_1725
chr10	553791	554508	718	182.68	3.2913	1.2776	1.92665	.//_peak_122
chr9	148950	152210	3261	182.67	3.32256	1.27753	1.95599	.//_peak_1744
chr17	403865	406057	2193	224.37	3.8992	1.27727	2.45003	.//_peak_779
chr14	645212	645960	749	182.62	3.2741	1.27709	1.91146	.//_peak_474
chr3	1221119	1222410	1292	182.59	3.2648	1.27697	1.90297	.//_peak_1213
chr8	457842	458343	502	186.43	3.32241	1.27695	1.9539	.//_peak_1679
chr12	459786	460077	292	182.59	3.26971	1.27693	1.90759	.//_peak_327
chr5	287766	289881	2116	182.57	3.28337	1.27682	1.92049	.//_peak_1401
chr6	225659	226829	1171	188.21	3.36585	1.27676	1.9926	.//_peak_1474
chr11	298705	300703	1999	226.16	3.87451	1.27648	2.42674	.//_peak_209
chr6	47238	47773	536	182.51	3.25988	1.27637	1.89928	.//_peak_1471
chr20	192230	194701	2472	232.99	3.9367	1.27625	2.47664	.//_peak_945
chr17	422739	424857	2119	206.25	3.5988	1.27617	2.19189	.//_peak_782
chr15	848367	849890	1524	182.48	3.24393	1.27616	1.88485	.//_peak_661
chr4	12972	13820	849	183.71	3.27257	1.27608	1.91339	.//_peak_1274
chr11	637355	638358	1004	182.54	3.27093	1.27605	1.9103	.//_peak_266
chr2	85682	86218	537	182.46	3.23777	1.27604	1.87934	.//_peak_856
chr21	214334	215747	1414	195.09	3.45044	1.27596	2.06657	.//_peak_995
chr10	762605	762893	289	182.44	3.23509	1.27589	1.87699	.//_peak_137
chr15	933804	936104	2301	182.41	3.28268	1.27573	1.9216	.//_peak_665
chr15	330308	330629	322	182.41	3.23268	1.27571	1.87515	.//_peak_594
chr8	929182	930289	1108	277.9	4.51995	1.27563	2.97906	.//_peak_1720
chr16	672543	672915	373	182.4	3.28964	1.27561	1.92822	.//_peak_702
chr7	1259464	1260610	1147	354.93	5.94874	1.27561	4.24759	.//_peak_1659
chr22	113261	114180	920	186.24	3.28306	1.27548	1.91971	.//_peak_1039
chr11	716383	717551	1169	248.68	4.12643	1.2753	2.6374	.//_peak_279
chr8	613093	614828	1736	184.88	3.28307	1.27528	1.92148	.//_peak_1688
chr10	730842	732601	1760	182.34	3.25155	1.27522	1.89341	.//_peak_134
chr8	615820	616317	498	182.34	3.24768	1.27522	1.88976	.//_peak_1689
chr8	626974	629077	2104	183.73	3.26914	1.27511	1.90972	.//_peak_1691
chr9	354172	358139	3968	183.15	3.25074	1.27509	1.89261	.//_peak_1756
chr6	1105486	1107560	2075	308.38	4.9569	1.27506	3.35412	.//_peak_1516
chr16	157934	158317	384	182.32	3.22621	1.27505	1.87017	.//_peak_673
chr8	434581	436360	1780	182.31	3.23821	1.275	1.88135	.//_peak_1675
chr10	117570	117982	413	182.3	3.23227	1.27493	1.87589	.//_peak_95
chr1	1569671	1570007	337	182.29	3.22228	1.27489	1.86672	.//_peak_56
chr3	18365	19316	952	192.54	3.38656	1.27482	2.01149	.//_peak_1115
chr4	1065199	1065589	391	182.26	3.22101	1.27466	1.86591	.//_peak_1342
chr4	491256	492355	1100	182.26	3.22133	1.27465	1.86615	.//_peak_1310
chr8	295509	295860	352	182.26	3.24002	1.27464	1.88357	.//_peak_1671
chr18	413740	415755	2016	182.24	3.25625	1.27454	1.89882	.//_peak_827
chr4	330148	331475	1328	182.24	3.21954	1.27454	1.8647	.//_peak_1303
chr23	1631	1965	335	183.04	3.2655	1.27438	1.90816	.//_peak_1062
chr11	387026	387458	433	182.21	3.22754	1.27432	1.87245	.//_peak_223
chr6	503952	505918	1967	182.21	3.24052	1.27429	1.88455	.//_peak_1483
chr3	1430190	1431130	941	183.38	3.26465	1.27423	1.90776	.//_peak_1241
chr15	497800	498996	1197	182.2	3.22411	1.27418	1.86958	.//_peak_623
chr1	987764	988645	882	182.19	3.21731	1.27413	1.86329	.//_peak_27
chr11	659696	662093	2398	206.71	3.59435	1.27405	2.18929	.//_peak_270
chr3	557504	557829	326	182.17	3.204	1.27401	1.85111	.//_peak_1144
chr7	754504	755052	549	182.16	3.23562	1.27395	1.88048	.//_peak_1636
chr8	601106	604194	3089	182.14	3.22059	1.27375	1.86688	.//_peak_1686
chr5	452104	452782	679	184.79	3.25995	1.27368	1.90275	.//_peak_1417
chr7	1137278	1139045	1768	186.19	3.26358	1.27368	1.90425	.//_peak_1651
chr14	383190	385373	2184	185.05	3.26721	1.27361	1.90972	.//_peak_434
chr5	790532	791012	481	182.5	3.21512	1.27357	1.86205	.//_peak_1427
chr6	1235576	1235843	268	190.07	3.32318	1.27357	1.95749	.//_peak_1527
chr10	572135	573148	1014	182.1	3.21823	1.27352	1.8651	.//_peak_124
chr14	864279	865213	935	188.28	3.28097	1.27342	1.92104	.//_peak_511
chr14	241582	243992	2411	190.75	3.34788	1.27333	1.97965	.//_peak_409
chr17	331253	334989	3737	212.94	3.71544	1.27333	2.29857	.//_peak_767
chr1	1542669	1543278	610	182.06	3.21968	1.27324	1.86678	.//_peak_54
chr35	26789	27110	322	267.94	4.33778	1.27316	2.81831	.//_peak_1266
chr6	12488	16588	4101	265.71	4.46085	1.27308	2.93681	.//_peak_1465
chr2	1087690	1088260	571	182.01	3.21418	1.27291	1.86219	.//_peak_900
chr3	625107	626591	1485	192.94	3.40459	1.27282	2.03109	.//_peak_1152
chr3	57286	58517	1232	182	3.19567	1.27277	1.84532	.//_peak_1122
chr4	584538	586343	1806	181.99	3.20527	1.27277	1.85414	.//_peak_1315
chr22	463065	464013	949	257.34	4.23944	1.27265	2.7417	.//_peak_1060
chr1	1406465	1406872	408	181.96	3.20914	1.27258	1.858	.//_peak_49
chr14	48581	48896	316	181.95	3.21549	1.27251	1.86404	.//_peak_391
chr4	68950	70616	1667	183.57	3.2294	1.27251	1.87726	.//_peak_1282
chr17	41723	42665	943	254.94	4.14391	1.27214	2.65325	.//_peak_717
chr2	947975	948719	745	181.9	3.21209	1.27214	1.86147	.//_peak_891
chr7	220660	222537	1878	264.17	4.40592	1.27201	2.88913	.//_peak_1565
chr35	16626	19806	3181	183.19	3.21947	1.27176	1.86858	.//_peak_1264
chr1	635863	637255	1393	181.84	3.18954	1.27174	1.84113	.//_peak_14
chr7	667906	669802	1897	181.84	3.1699	1.27173	1.82292	.//_peak_1626
chr16	451693	452787	1095	181.83	3.2005	1.27166	1.85144	.//_peak_688
chr17	179989	182654	2666	238.89	3.93483	1.27143	2.4763	.//_peak_738
chr27	36703	37145	443	219.57	3.62933	1.27139	2.21368	.//_peak_1110
chr9	991840	997344	5505	262.05	4.18499	1.27131	2.69547	.//_peak_1813
chr22	210652	214495	3844	192.79	3.31411	1.27129	1.94912	.//_peak_1040
chr14	351760	353878	2119	182.44	3.19972	1.27118	1.85121	.//_peak_428
chr18	159656	160701	1046	181.76	3.17209	1.27117	1.82574	.//_peak_810
chr8	869733	871390	1658	259.23	4.18617	1.27113	2.69498	.//_peak_1714
chr13	604706	605627	922	181.75	3.19184	1.27111	1.84428	.//_peak_368
chr20	267404	268026	623	221.86	3.69518	1.27111	2.27211	.//_peak_956
chr1	1725232	1725741	510	204.12	3.47922	1.27095	2.09028	.//_peak_75
chr9	195100	197592	2493	181.82	3.17277	1.2709	1.82691	.//_peak_1747
chr1	596506	597163	658	181.7	3.15634	1.27074	1.8118	.//_peak_13
chr6	1243048	1243377	330	181.7	3.17471	1.27073	1.8289	.//_peak_1528
chr3	1397827	1398989	1163	223.4	3.71639	1.27066	2.29053	.//_peak_1237
chr3	31919	33764	1846	184.68	3.21591	1.27062	1.86768	.//_peak_1118
chr3	464555	464957	403	181.73	3.16336	1.2706	1.81905	.//_peak_1135
chr14	321407	324030	2624	185.5	3.21543	1.27057	1.86568	.//_peak_423
chr17	123173	129079	5907	231.7	3.83987	1.2705	2.39776	.//_peak_731
chr9	1001622	1004497	2876	187.62	3.243	1.27036	1.88894	.//_peak_1814
chr1	1278256	1278902	647	181.6	3.15186	1.27008	1.80872	.//_peak_41
chr7	131435	133236	1802	265.4	4.28446	1.27004	2.77704	.//_peak_1553
chr1	1717275	1718920	1646	193.74	3.32656	1.26996	1.96144	.//_peak_72
chr20	50736	51998	1263	232.19	3.81123	1.26995	2.37155	.//_peak_924
chr12	1159424	1159895	472	181.55	3.13726	1.26974	1.79575	.//_peak_355
chr4	1097553	1099875	2323	181.53	3.15508	1.2696	1.81245	.//_peak_1346
chr3	1206541	1208765	2225	207.01	3.52578	1.26954	2.13141	.//_peak_1211
chr22	465021	465916	896	194.85	3.30124	1.26941	1.93566	.//_peak_1061
chr1	1732673	1734509	1837	212.91	3.55728	1.26939	2.15496	.//_peak_78
chr17	221073	223052	1980	226.09	3.73773	1.26938	2.30919	.//_peak_746
chr11	417359	417742	384	183.22	3.16994	1.26936	1.82794	.//_peak_229
chr7	506560	506822	263	181.48	3.11725	1.2692	1.77802	.//_peak_1608
chr3	546783	547059	277	181.47	3.14877	1.26918	1.80715	.//_peak_1143
chr5	1018801	1019611	811	187.88	3.21578	1.26915	1.86491	.//_peak_1434
chr3	1179503	1179836	334	181.51	3.13401	1.2691	1.79379	.//_peak_1209
chr13	815709	818356	2648	181.73	3.14447	1.26907	1.80347	.//_peak_380
chr13	675934	677223	1290	182.74	3.1434	1.26906	1.80235	.//_peak_373
chr4	1419356	1419621	266	181.47	3.14238	1.26896	1.80172	.//_peak_1373
chr1	1585882	1586285	404	181.43	3.11464	1.2689	1.77596	.//_peak_57
chr3	1347675	1348980	1306	184.29	3.17599	1.26884	1.8327	.//_peak_1227
chr11	295231	296204	974	227.76	3.70103	1.26879	2.27423	.//_peak_208
chr21	464632	465078	447	182.47	3.13649	1.26872	1.79641	.//_peak_1037
chr4	589146	589500	355	181.4	3.12283	1.26865	1.78398	.//_peak_1316
chr8	941214	941769	556	251.14	4.02223	1.26859	2.54913	.//_peak_1722
chr14	471601	472861	1261	193.57	3.34108	1.26858	1.97749	.//_peak_443
chr6	1101533	1101981	449	316.44	4.83968	1.26854	3.2485	.//_peak_1515
chr18	375044	376174	1131	181.38	3.14403	1.26853	1.80374	.//_peak_823
chr14	1005461	1005773	313	181.35	3.11168	1.26835	1.77405	.//_peak_533
chr6	533854	534105	252	181.34	3.13228	1.26827	1.79319	.//_peak_1486
chr14	10351	10616	266	181.33	3.11104	1.26816	1.7737	.//_peak_388
chr6	701274	702150	877	181.32	3.10934	1.26813	1.77216	.//_peak_1490
chr16	689764	690668	905	181.31	3.1271	1.26798	1.78899	.//_peak_703
chr21	331530	333885	2356	181.61	3.13085	1.26788	1.79366	.//_peak_1019
chr15	47236	48535	1300	181.28	3.10609	1.26787	1.76955	.//_peak_547
chr4	98921	100785	1865	276.65	4.30833	1.26736	2.79261	.//_peak_1290
chr14	699877	700490	614	185.07	3.14956	1.26715	1.80838	.//_peak_484
chr7	120542	120893	352	236.07	3.81428	1.26703	2.37329	.//_peak_1552
chr15	247720	250056	2337	365.13	5.50656	1.26699	3.83266	.//_peak_579
chr16	75983	76650	668	181.16	3.11806	1.26698	1.78203	.//_peak_671
chr6	731809	732965	1157	181.16	3.1072	1.26698	1.77184	.//_peak_1493
chr16	404920	405265	346	181.15	3.10605	1.26692	1.77109	.//_peak_685
chr1	1367055	1368130	1076	181.13	3.09872	1.26679	1.76433	.//_peak_47
chr4	882677	886442	3766	181.08	3.12811	1.26645	1.79229	.//_peak_1332
chr23	62080	63768	1689	225.14	3.70064	1.26637	2.28069	.//_peak_1072
chr7	549313	551152	1840	205.03	3.45296	1.26634	2.07116	.//_peak_1616
chr17	435008	436854	1847	209.77	3.49004	1.26623	2.1024	.//_peak_785
chr38	22736	23791	1056	181.41	3.09727	1.2662	1.76395	.//_peak_1271
chr10	469998	470631	634	181.04	3.09463	1.26617	1.76149	.//_peak_116
chr7	608447	610675	2229	181.55	3.08627	1.26615	1.75397	.//_peak_1624
chr1	1006651	1006935	285	181.02	3.06147	1.26599	1.73097	.//_peak_28
chr12	74081	74444	364	181.01	3.09256	1.26597	1.75995	.//_peak_311
chr1	903661	903921	261	181.01	3.06291	1.26594	1.73244	.//_peak_26
chr5	1251987	1253086	1100	184.47	3.12797	1.26586	1.79186	.//_peak_1443
chr3	638796	639591	796	180.99	3.09595	1.26582	1.76331	.//_peak_1154
chr14	980290	985295	5006	187.25	3.16042	1.26575	1.81784	.//_peak_529
chr16	488751	489241	491	180.94	3.06601	1.2655	1.73608	.//_peak_691
chr4	591875	593070	1196	180.94	3.11019	1.26549	1.77703	.//_peak_1317
chr5	951484	952136	653	180.93	3.0589	1.26542	1.72949	.//_peak_1432
chr15	902489	902901	413	188.21	3.1413	1.26523	1.80089	.//_peak_664
chr6	1494142	1496747	2606	316.68	5.23782	1.26521	3.63676	.//_peak_1545
chr4	153632	153938	307	180.88	3.06402	1.26508	1.73478	.//_peak_1298
chr16	29858	30280	423	182.74	3.10931	1.26505	1.77741	.//_peak_668
chr12	966150	968738	2589	180.85	3.0807	1.26485	1.75062	.//_peak_344
chr14	1021507	1024015	2509	197.59	3.28806	1.2648	1.92946	.//_peak_536
chr3	1217862	1218671	810	180.84	3.04787	1.26478	1.72029	.//_peak_1212
chr4	494105	494624	520	180.84	3.06254	1.26478	1.73396	.//_peak_1311
chr8	700983	701583	601	180.84	3.04712	1.26478	1.71958	.//_peak_1696
chr1	494119	494955	837	180.83	3.05881	1.26472	1.73043	.//_peak_9
chr5	299698	300313	616	180.79	3.05365	1.26445	1.72607	.//_peak_1402
chr14	940078	942618	2541	187.47	3.15025	1.26438	1.8127	.//_peak_521
chr7	483351	484433	1083	198.94	3.29646	1.2643	1.93598	.//_peak_1603
chr1	1250174	1251274	1101	180.76	3.04859	1.26419	1.72171	.//_peak_39
chr5	395987	396499	513	180.76	3.04904	1.26419	1.72226	.//_peak_1413
chr2	392496	394599	2104	180.69	3.07705	1.26376	1.74899	.//_peak_871
chr17	34559	37436	2878	223.55	3.61101	1.26374	2.20337	.//_peak_715
chr5	463766	464750	985	180.69	3.03978	1.26374	1.71428	.//_peak_1419
chr20	61665	64833	3169	222.36	3.58364	1.26373	2.17908	.//_peak_927
chr21	414019	415702	1684	183.77	3.08436	1.26356	1.7565	.//_peak_1030
chr10	609752	610730	979	180.66	3.03534	1.26354	1.71065	.//_peak_128
chr14	453221	453472	252	180.64	3.04532	1.26337	1.71994	.//_peak_441
chr11	578306	579847	1542	181.35	3.05673	1.26334	1.7302	.//_peak_255
chr22	417075	417972	898	271.15	4.12474	1.2633	2.63617	.//_peak_1055
chr11	122597	129070	6474	182.72	3.07653	1.26311	1.74843	.//_peak_174
chr11	695924	697901	1978	208.85	3.41576	1.26295	2.03813	.//_peak_277
chr21	305216	306795	1580	180.74	3.04394	1.2629	1.71969	.//_peak_1013
chr11	729513	730810	1298	248.99	3.91238	1.2627	2.45967	.//_peak_281
chr9	570662	571208	547	180.53	3.0183	1.26262	1.69603	.//_peak_1764
chr7	835065	835615	551	180.52	3.0268	1.26255	1.70412	.//_peak_1640
chr5	500529	501868	1340	181.02	3.0146	1.26254	1.69283	.//_peak_1421
chr20	67604	71586	3983	216.71	3.47777	1.26223	2.08824	.//_peak_928
chr20	107569	108667	1099	209.75	3.44273	1.26221	2.06363	.//_peak_933
chr3	919951	920989	1039	181.54	3.02946	1.26217	1.70855	.//_peak_1181
chr8	854433	855345	913	257.16	4.00838	1.26207	2.54269	.//_peak_1712
chr5	899281	899594	314	180.66	3.02058	1.26202	1.69915	.//_peak_1429
chr6	549381	550075	695	180.44	3.00534	1.26197	1.68508	.//_peak_1487
chr9	851008	851315	308	182.42	3.03722	1.26183	1.71614	.//_peak_1785
chr14	667368	668592	1225	190.02	3.12865	1.26181	1.7932	.//_peak_477
chr3	509996	510250	255	180.41	3.0021	1.2618	1.68236	.//_peak_1139
chr3	756869	757781	913	180.4	2.99491	1.26171	1.6758	.//_peak_1167
chr11	560915	561507	593	180.44	2.99621	1.26158	1.67708	.//_peak_253
chr17	71559	73588	2030	222.15	3.54714	1.26148	2.14852	.//_peak_722
chr15	776821	777679	859	182.07	3.03063	1.26144	1.7082	.//_peak_651
chr3	390268	391111	844	180.36	3.00384	1.26143	1.68448	.//_peak_1132
chr17	419206	420832	1627	225.11	3.62316	1.26138	2.21637	.//_peak_781
chr3	823754	824203	450	181.83	3.02476	1.26099	1.70568	.//_peak_1174
chr4	774617	775461	845	180.29	3.00706	1.26097	1.68824	.//_peak_1329
chr4	1124263	1126224	1962	180.27	2.99136	1.26082	1.6738	.//_peak_1351
chr6	1075975	1078254	2280	180.27	3.00829	1.2608	1.68962	.//_peak_1509
chr3	474160	474451	292	180.26	2.98752	1.26063	1.67087	.//_peak_1138
chr5	214879	216927	2049	181.38	2.99327	1.26058	1.6757	.//_peak_1395
chr14	794679	795667	989	195.21	3.16304	1.26023	1.82215	.//_peak_502
chr8	1246795	1247244	450	180.18	2.98264	1.26018	1.66676	.//_peak_1736
chr1	550107	550528	422	180.17	2.97248	1.2601	1.65738	.//_peak_10
chr12	379482	379864	383	180.15	2.9619	1.25996	1.64771	.//_peak_322
chr4	1403380	1404219	840	180.15	2.98157	1.25995	1.66611	.//_peak_1369
chr9	1187283	1187644	362	181.54	2.98908	1.25992	1.67388	.//_peak_1839
chr15	109097	110479	1383	242.42	3.75424	1.25985	2.32426	.//_peak_557
chr11	240740	241846	1107	191.65	3.12261	1.2598	1.78766	.//_peak_200
chr2	747271	747920	650	180.11	2.98896	1.25969	1.67332	.//_peak_886
chr12	76481	76788	308	180.09	2.96187	1.25955	1.64844	.//_peak_312
chr9	253043	254504	1462	180.08	2.9755	1.2595	1.6611	.//_peak_1750
chr14	977291	978117	827	194.32	3.17438	1.25949	1.83441	.//_peak_528
chr16	586846	587907	1062	180.08	2.97438	1.25948	1.6601	.//_peak_696
chr3	794085	794997	913	180.09	2.97085	1.25946	1.6571	.//_peak_1171
chr10	1100330	1101781	1452	180.07	2.9703	1.2594	1.6564	.//_peak_153
chr6	1088403	1089637	1235	192.3	3.12386	1.25934	1.78944	.//_peak_1512
chr10	590074	590553	480	180.06	2.96283	1.25933	1.64965	.//_peak_125
chr9	1230267	1231370	1104	180.05	2.99042	1.25929	1.67532	.//_peak_1845
chr16	474705	475888	1184	180.04	2.97003	1.25922	1.65651	.//_peak_690
chr11	198354	199196	843	196.9	3.16742	1.25892	1.8258	.//_peak_189
chr21	110223	111836	1614	189.92	3.08776	1.2587	1.75966	.//_peak_978
chr20	248502	251246	2745	233.65	3.60932	1.25853	2.19972	.//_peak_953
chr7	537164	537562	399	180.18	2.94753	1.25843	1.63716	.//_peak_1613
chr6	1226196	1228331	2136	179.92	2.95839	1.25837	1.64698	.//_peak_1526
chr15	294450	295276	827	211.3	3.33613	1.25834	1.96848	.//_peak_585
chr5	1482724	1483845	1122	179.91	2.94597	1.25828	1.63565	.//_peak_1456
chr21	95259	96111	853	180.69	2.96563	1.25826	1.65516	.//_peak_976
chr14	575797	577293	1497	179.88	2.96201	1.25809	1.65078	.//_peak_462
chr15	361226	362383	1158	182.78	2.97588	1.25795	1.66286	.//_peak_603
chr10	33190	33921	732	179.83	2.94755	1.25778	1.6379	.//_peak_89
chr12	446092	446349	258	179.81	2.92327	1.25762	1.61545	.//_peak_325
chr14	265584	267092	1509	183.24	2.98747	1.25761	1.67481	.//_peak_414
chr37	550	1179	630	401.83	5.74466	1.2576	4.05103	.//_peak_1268
chr6	1086188	1086828	641	180.08	2.93234	1.25745	1.62489	.//_peak_1511
chr11	763524	763799	276	218.14	3.4317	1.2574	2.05243	.//_peak_285
chr4	676524	678445	1922	179.87	2.93829	1.25739	1.63018	.//_peak_1326
chr18	48698	48965	268	179.76	2.92838	1.25724	1.62092	.//_peak_804
chr11	441411	443272	1862	196.24	3.15566	1.2572	1.81883	.//_peak_232
chr9	876511	876834	324	185.6	2.98875	1.25709	1.67308	.//_peak_1791
chr10	816214	816576	363	179.73	2.92843	1.25706	1.62119	.//_peak_140
chr6	726853	727491	639	179.71	2.9193	1.25689	1.61298	.//_peak_1492
chr4	335487	335794	308	179.68	2.91967	1.25674	1.61353	.//_peak_1304
chr2	16661	16943	283	179.68	2.92692	1.25672	1.62031	.//_peak_850
chr6	875186	877937	2752	180.25	2.93487	1.25669	1.62786	.//_peak_1496
chr14	182236	182888	653	179.67	2.9203	1.25664	1.6143	.//_peak_401
chr3	1145977	1146352	376	179.67	2.93999	1.25664	1.63257	.//_peak_1204
chr3	1154107	1156101	1995	179.64	2.91802	1.25646	1.61239	.//_peak_1205
chr10	447852	448627	776	179.64	2.91948	1.25645	1.61381	.//_peak_112
chr6	108702	109403	702	179.64	2.92472	1.25642	1.61871	.//_peak_1472
chr1	1236829	1237157	329	179.64	2.91021	1.25641	1.60522	.//_peak_38
chr4	887799	888056	258	179.63	2.91276	1.25639	1.60761	.//_peak_1333
chr15	447212	447943	732	191.78	3.06258	1.25615	1.73804	.//_peak_616
chr5	251173	254113	2941	179.6	2.93035	1.25614	1.62433	.//_peak_1398
chr21	170827	172660	1834	190.39	3.04863	1.25607	1.72699	.//_peak_985
chr5	1384002	1384375	374	179.58	2.91697	1.25601	1.61228	.//_peak_1454
chr6	1358152	1358766	615	179.57	2.90326	1.25594	1.59948	.//_peak_1532
chr12	1155496	1156175	680	179.56	2.91876	1.25584	1.61407	.//_peak_354
chr11	159434	159750	317	180.53	2.91556	1.25578	1.61193	.//_peak_180
chr12	1151635	1151909	275	179.52	2.89202	1.25559	1.5895	.//_peak_353
chr10	233232	234098	867	179.49	2.91553	1.25539	1.61185	.//_peak_100
chr2	1101001	1101762	762	179.87	2.90318	1.25535	1.60105	.//_peak_904
chr10	306831	307289	459	179.46	2.88905	1.2552	1.58742	.//_peak_104
chr7	593339	593974	636	179.46	2.88601	1.25516	1.58464	.//_peak_1623
chr3	1173175	1174597	1423	179.42	2.89207	1.25491	1.59073	.//_peak_1208
chr4	1300785	1301078	294	179.43	2.88492	1.25491	1.58405	.//_peak_1362
chr23	185192	186381	1190	182.93	2.93296	1.2549	1.6281	.//_peak_1085
chr9	759673	760214	542	179.42	2.88792	1.25489	1.58692	.//_peak_1777
chr5	1280948	1282844	1897	186.83	2.98196	1.25483	1.66992	.//_peak_1447
chr20	464447	471052	6606	208.52	3.27719	1.25458	1.92302	.//_peak_971
chr5	1505513	1506279	767	179.37	2.88828	1.25455	1.58761	.//_peak_1457
chr14	347111	347657	547	179.37	2.87823	1.25454	1.57844	.//_peak_427
chr14	156086	157942	1857	179.39	2.88284	1.25451	1.58288	.//_peak_399
chr12	631020	631978	959	210.58	3.25268	1.25447	1.89797	.//_peak_337
chr11	157037	157438	402	179.36	2.89261	1.25432	1.59239	.//_peak_179
chr11	670166	670994	829	210.65	3.25396	1.25423	1.89856	.//_peak_272
chr5	325005	325816	812	179.32	2.88302	1.2542	1.58348	.//_peak_1405
chr6	1421966	1422396	431	206.05	3.22017	1.25417	1.87223	.//_peak_1536
chr17	193398	199234	5837	237.71	3.61253	1.2541	2.20648	.//_peak_741
chr7	406011	406283	273	186.48	2.95729	1.25386	1.65118	.//_peak_1593
chr4	1072777	1073812	1036	179.97	2.88289	1.25376	1.58492	.//_peak_1343
chr5	1207341	1207924	584	179.25	2.8775	1.25373	1.57894	.//_peak_1442
chr11	230865	232104	1240	194.56	3.04754	1.25371	1.72502	.//_peak_197
chr1	573176	574855	1680	179.22	2.86876	1.25349	1.57121	.//_peak_11
chr15	686532	688441	1910	190.57	3.0044	1.25348	1.6894	.//_peak_638
chr16	771235	771484	250	221.03	3.33567	1.25341	1.96533	.//_peak_710
chr18	493664	494633	970	179.2	2.86495	1.25339	1.5678	.//_peak_833
chr4	1394808	1395735	928	179.2	2.86585	1.25339	1.56857	.//_peak_1368
chr11	222316	222929	614	182.93	2.92252	1.25327	1.61979	.//_peak_194
chr10	745413	747209	1797	179.18	2.8722	1.25326	1.57471	.//_peak_136
chr16	712814	713267	454	179.18	2.86476	1.25326	1.56787	.//_peak_704
chr14	932547	933094	548	202.14	3.14536	1.25317	1.80848	.//_peak_520
chr7	1145024	1146111	1088	179.17	2.86216	1.25315	1.5656	.//_peak_1652
chr1	768226	768616	391	179.16	2.86801	1.25312	1.57112	.//_peak_17
chr17	237544	237839	296	223.46	3.37461	1.2531	1.99976	.//_peak_750
chr15	695649	696390	742	209.94	3.22378	1.25309	1.87343	.//_peak_640
chr3	949331	952511	3181	195.43	3.05015	1.25307	1.7272	.//_peak_1185
chr2	964750	965544	795	179.15	2.86474	1.25301	1.56817	.//_peak_892
chr15	321573	322065	493	179.15	2.86219	1.25299	1.56596	.//_peak_592
chr1	1625483	1626044	562	252.64	3.69242	1.2529	2.26703	.//_peak_61
chr18	279251	280624	1374	179.13	2.85738	1.25288	1.56157	.//_peak_819
chr13	368116	368638	523	179.12	2.86303	1.25281	1.56699	.//_peak_359
chr17	191074	191952	879	228.27	3.44998	1.2528	2.06493	.//_peak_740
chr11	771115	771479	365	220.46	3.32459	1.25278	1.95675	.//_peak_287
chr11	552656	553316	661	179.82	2.86294	1.25276	1.56716	.//_peak_252
chr3	748055	749385	1331	179.11	2.85448	1.25274	1.55913	.//_peak_1166
chr15	535728	536038	311	181.59	2.87687	1.2527	1.5816	.//_peak_630
chr8	455799	456475	677	186.63	2.93042	1.2526	1.62495	.//_peak_1678
chr2	596441	597121	681	179.08	2.85183	1.25257	1.55695	.//_peak_880
chr5	130918	134707	3790	243.87	3.5626	1.25239	2.15869	.//_peak_1394
chr14	193480	193764	285	184.1	2.90131	1.25229	1.60108	.//_peak_402
chr5	35822	37472	1651	255.96	3.75879	1.25219	2.32856	.//_peak_1385
chr10	278034	278833	800	179.03	2.84766	1.25217	1.55364	.//_peak_102
chr25	123722	124328	607	351.51	4.92207	1.25214	3.32853	.//_peak_1105
chr7	558062	559128	1067	210.06	3.20547	1.25212	1.85745	.//_peak_1617
chr9	1156672	1157265	594	179.02	2.85057	1.25209	1.55641	.//_peak_1834
chr2	841491	841766	276	179.01	2.83835	1.25203	1.54514	.//_peak_888
chr9	949565	951736	2172	181.96	2.88385	1.2518	1.58614	.//_peak_1806
chr22	421159	423738	2580	218.02	3.30414	1.25178	1.94178	.//_peak_1056
chr9	911731	914033	2303	187.64	2.95765	1.25164	1.65076	.//_peak_1797
chr14	775931	777582	1652	190.33	2.96746	1.25147	1.65789	.//_peak_498
chr3	813317	813800	484	180.89	2.85864	1.2514	1.56636	.//_peak_1172
chr5	82932	84475	1544	286.25	4.11592	1.25094	2.63545	.//_peak_1390
chr9	1258131	1259350	1220	178.83	2.82228	1.25077	1.53238	.//_peak_1850
chr15	561281	562495	1215	182.18	2.86652	1.25076	1.57176	.//_peak_633
chr15	75482	76533	1052	178.81	2.81378	1.25066	1.52437	.//_peak_551
chr8	208726	209377	652	178.79	2.81757	1.25053	1.52824	.//_peak_1665
chr18	438193	439961	1769	178.79	2.83184	1.25048	1.54155	.//_peak_829
chr5	598280	599154	875	178.78	2.81574	1.25047	1.52659	.//_peak_1423
chr9	750623	751385	763	178.78	2.82538	1.25045	1.53562	.//_peak_1775
chr4	1278181	1278640	460	178.76	2.82278	1.25029	1.53345	.//_peak_1359
chr8	820973	821382	410	227.24	3.36708	1.25019	1.99366	.//_peak_1705
chr21	441928	442398	471	194.59	2.98794	1.25018	1.67475	.//_peak_1033
chr8	1071419	1072417	999	254.18	3.71868	1.24993	2.29431	.//_peak_1732
chr11	955761	959508	3748	178.84	2.82843	1.2497	1.53964	.//_peak_303
chr11	1059507	1061094	1588	178.65	2.81246	1.24956	1.525	.//_peak_306
chr3	1036328	1038056	1729	178.64	2.80946	1.24947	1.52232	.//_peak_1194
chr31	14619	15464	846	178.78	2.80374	1.2494	1.51735	.//_peak_1259
chr6	894388	894953	566	178.7	2.80138	1.24923	1.51508	.//_peak_1499
chr21	298162	299526	1365	212.43	3.21368	1.24921	1.86757	.//_peak_1011
chr7	247153	247585	433	225.29	3.34824	1.24887	1.97996	.//_peak_1571
chr14	679578	679836	259	178.62	2.79511	1.24876	1.51025	.//_peak_480
chr3	1198030	1198764	735	180.77	2.81563	1.24876	1.5274	.//_peak_1210
chr20	219112	220345	1234	240.3	3.5004	1.24867	2.10716	.//_peak_949
chr11	273638	274359	722	182.09	2.83845	1.24861	1.55059	.//_peak_205
chr20	165541	166174	634	230.75	3.41656	1.24859	2.03843	.//_peak_941
chr11	14694	15566	873	198.81	3.00821	1.24846	1.69182	.//_peak_155
chr17	169490	172066	2577	220.21	3.2551	1.24831	1.89955	.//_peak_736
chr1	1752657	1755007	2351	214.55	3.18884	1.24809	1.84437	.//_peak_82
chr11	77997	78590	594	178.67	2.78506	1.24809	1.50203	.//_peak_165
chr6	1443525	1444071	547	180.04	2.79716	1.24805	1.51452	.//_peak_1537
chr26	14332	14587	256	178.95	2.7763	1.24804	1.49403	.//_peak_1108
chr7	575008	575647	640	178.42	2.78498	1.24791	1.50207	.//_peak_1621
chr2	690746	691179	434	178.41	2.79165	1.2479	1.50832	.//_peak_884
chr2	367720	370748	3029	178.46	2.79536	1.24786	1.51201	.//_peak_867
chr22	447167	449324	2158	180.42	2.79046	1.24741	1.50664	.//_peak_1057
chr21	376681	377029	349	178.34	2.76155	1.24738	1.4809	.//_peak_1024
chr27	39793	40169	377	186.9	2.86511	1.24727	1.57257	.//_peak_1111
chr23	44798	45356	559	178.33	2.76712	1.2472	1.48677	.//_peak_1069
chr3	939122	940645	1524	203.48	3.03848	1.24718	1.7177	.//_peak_1184
chr2	915214	915653	440	178.31	2.76267	1.24717	1.48235	.//_peak_890
chr21	318236	318596	361	178.37	2.75793	1.24661	1.47916	.//_peak_1017
chr20	414537	415606	1070	295.18	4.14905	1.24626	2.66674	.//_peak_964
chr2	1323355	1324338	984	178.17	2.75216	1.24622	1.47409	.//_peak_917
chr3	140737	141783	1047	178.16	2.75009	1.24615	1.47221	.//_peak_1125
chr3	1354595	1355018	424	180.51	2.78049	1.24613	1.50151	.//_peak_1228
chr21	307796	308827	1032	178.32	2.77012	1.246	1.49157	.//_peak_1014
chr13	680221	680594	374	178.13	2.75279	1.24596	1.47509	.//_peak_375
chr1	1741768	1742511	744	200.52	3.00623	1.24592	1.69121	.//_peak_80
chr1	1274877	1275321	445	178.12	2.74479	1.24589	1.46766	.//_peak_40
chr10	631171	632060	890	178.1	2.74229	1.24574	1.46567	.//_peak_131
chr3	1361751	1363061	1311	178.14	2.74693	1.24572	1.47004	.//_peak_1229
chr1	1729632	1729965	334	212.4	3.12055	1.24558	1.78654	.//_peak_77
chr6	25739	26299	561	178.07	2.74402	1.2455	1.46756	.//_peak_1468
chr11	354114	354388	275	190.63	2.87552	1.2452	1.58125	.//_peak_218
chr3	511523	511834	312	178.02	2.73952	1.24514	1.46411	.//_peak_1140
chr3	1010314	1010957	644	177.99	2.73415	1.24494	1.45932	.//_peak_1191
chr10	465974	467761	1788	177.98	2.73239	1.2449	1.45777	.//_peak_115
chr11	502154	502559	406	184.65	2.80604	1.2449	1.52382	.//_peak_241
chr4	1405401	1406286	886	178.01	2.72757	1.24482	1.45344	.//_peak_1370
chr3	922591	923903	1313	178.55	2.72833	1.24473	1.45435	.//_peak_1182
chr21	204469	205650	1182	183.81	2.79354	1.24424	1.51219	.//_peak_993
chr11	840753	841823	1071	178.18	2.71805	1.24416	1.44566	.//_peak_300
chr10	626322	626613	292	177.85	2.7184	1.24399	1.44617	.//_peak_130
chr8	879712	881170	1459	314.29	4.21737	1.24395	2.71703	.//_peak_1715
chr15	315517	316093	577	177.86	2.7154	1.24384	1.44375	.//_peak_590
chr9	376575	376871	297	177.82	2.70883	1.24376	1.43754	.//_peak_1757
chr4	390266	390621	356	177.81	2.71264	1.2437	1.44126	.//_peak_1306
chr7	461062	461601	540	177.79	2.7073	1.24351	1.43671	.//_peak_1600
chr2	1173663	1174289	627	177.77	2.70536	1.24343	1.4349	.//_peak_910
chr14	493741	494994	1254	177.81	2.70487	1.24332	1.43462	.//_peak_448
chr4	663608	664519	912	177.7	2.69488	1.24292	1.42591	.//_peak_1325
chr6	572817	573115	299	177.66	2.69227	1.24267	1.42388	.//_peak_1488
chr6	1492574	1492989	416	306.15	4.09255	1.24267	2.6101	.//_peak_1544
chr14	245760	246097	338	183.44	2.75179	1.24266	1.47679	.//_peak_410
chr7	1158265	1160547	2283	178.02	2.70871	1.24266	1.43952	.//_peak_1653
chr15	180281	180992	712	183.86	2.75919	1.24265	1.48372	.//_peak_567
chr17	130878	132349	1472	228.06	3.27932	1.24257	1.92302	.//_peak_732
chr2	440864	442787	1924	177.64	2.69345	1.24253	1.42524	.//_peak_876
chr2	214095	214361	267	179.8	2.70808	1.24237	1.44068	.//_peak_860
chr7	173269	176267	2999	308.83	4.1712	1.24218	2.68183	.//_peak_1560
chr6	23049	24502	1454	177.59	2.68765	1.24215	1.42046	.//_peak_1467
chr5	1297685	1298246	562	177.58	2.67704	1.24207	1.41054	.//_peak_1449
chr5	86934	92110	5177	301	4.04706	1.24195	2.57426	.//_peak_1391
chr23	217501	218891	1391	194.45	2.87593	1.24193	1.58222	.//_peak_1088
chr14	711450	711702	253	177.53	2.67761	1.24174	1.41173	.//_peak_486
chr2	568522	568781	260	177.52	2.67759	1.24167	1.41181	.//_peak_879
chr2	1136034	1136296	263	177.52	2.68222	1.24167	1.41619	.//_peak_907
chr10	493743	494073	331	183.36	2.74899	1.24159	1.47548	.//_peak_119
chr15	142083	143556	1474	177.52	2.68159	1.24156	1.41579	.//_peak_561
chr4	1013573	1013849	277	177.5	2.67106	1.24154	1.40582	.//_peak_1339
chr18	485602	486130	529	179.33	2.693	1.24149	1.42686	.//_peak_831
chr5	1136610	1138884	2275	177.49	2.67173	1.24149	1.40656	.//_peak_1437
chr7	1190437	1191052	616	177.48	2.67217	1.24138	1.40717	.//_peak_1655
chr15	665328	665752	425	177.54	2.66898	1.24125	1.40654	.//_peak_636
chr10	464392	464966	575	177.45	2.66792	1.2412	1.40352	.//_peak_114
chr14	943644	944152	509	182.04	2.7259	1.24077	1.45841	.//_peak_522
chr7	1107602	1108645	1044	177.37	2.6619	1.24066	1.39874	.//_peak_1649
chr10	981659	982214	556	177.34	2.66079	1.24041	1.39821	.//_peak_149
chr4	934673	935419	747	177.29	2.65227	1.24012	1.39066	.//_peak_1335
chr15	851977	852737	761	182.89	2.71108	1.24006	1.44442	.//_peak_662
chr3	469995	470422	428	179.75	2.6718	1.24	1.41	.//_peak_1137
chr20	157693	158308	616	244.59	3.34369	1.2399	1.97194	.//_peak_939
chr7	704459	704945	487	179.17	2.67825	1.23986	1.41595	.//_peak_1631
chr15	787167	787879	713	191.4	2.79022	1.23983	1.50845	.//_peak_654
chr12	412561	413123	563	177.25	2.65262	1.23979	1.3916	.//_peak_324
chr4	66151	66803	653	179.01	2.66621	1.23979	1.40615	.//_peak_1281
chr3	1571860	1572565	706	177.24	2.65379	1.23975	1.39265	.//_peak_1256
chr6	902283	902674	392	177.24	2.6434	1.23973	1.38294	.//_peak_1500
chr29	11284	12816	1533	177.24	2.64706	1.2397	1.38648	.//_peak_1113
chr4	612044	612882	839	177.23	2.64541	1.23967	1.38491	.//_peak_1321
chr5	1285404	1286016	613	177.22	2.64537	1.2396	1.38503	.//_peak_1448
chr3	1032101	1032453	353	177.2	2.63859	1.23943	1.37892	.//_peak_1193
chr4	101936	107462	5527	265.89	3.607	1.23931	2.19885	.//_peak_1291
chr14	533548	534551	1004	185.18	2.71762	1.23916	1.44852	.//_peak_454
chr4	29790	30241	452	177.16	2.6396	1.23916	1.3804	.//_peak_1277
chr6	1270884	1272021	1138	177.13	2.63431	1.23895	1.37577	.//_peak_1529
chr35	14288	15325	1038	177.11	2.6312	1.23885	1.37304	.//_peak_1263
chr1	1419156	1419402	247	177.1	2.63014	1.23875	1.37217	.//_peak_51
chr9	1260347	1260748	402	177.08	2.62911	1.23859	1.37149	.//_peak_1851
chr16	762893	765878	2986	356.32	4.54777	1.23858	3.00217	.//_peak_708
chr15	175196	175910	715	186.4	2.7288	1.23852	1.45861	.//_peak_566
chr11	21100	22194	1095	178.44	2.63873	1.23827	1.38162	.//_peak_157
chr9	674999	675246	248	177.01	2.61867	1.23816	1.36238	.//_peak_1769
chr14	378973	380151	1179	177.28	2.62517	1.23807	1.36893	.//_peak_433
chr15	548885	549162	278	178	2.6297	1.23796	1.37475	.//_peak_631
chr9	719467	719937	471	176.98	2.61047	1.2379	1.35502	.//_peak_1771
chr2	29914	30426	513	176.97	2.61495	1.23785	1.35942	.//_peak_852
plasmid	4115	13848	9734	31155.7	342.272	1.23774	338.47	.//_peak_1855
chr2	1142626	1143313	688	176.95	2.61439	1.23773	1.35912	.//_peak_908
chr16	408888	409476	589	176.95	2.61167	1.23771	1.35658	.//_peak_686
chr7	145779	149485	3707	263.64	3.56851	1.2376	2.16805	.//_peak_1556
chr5	1378641	1378960	320	176.93	2.60894	1.23758	1.35419	.//_peak_1453
chr3	1298549	1298873	325	176.92	2.62088	1.23751	1.36567	.//_peak_1221
chr3	1427882	1428259	378	198.93	2.83708	1.23737	1.54841	.//_peak_1240
chr11	784277	785831	1555	179.86	2.63938	1.23733	1.38314	.//_peak_289
chr12	477827	478720	894	176.84	2.60193	1.23696	1.34872	.//_peak_328
chr1	584620	585473	854	176.82	2.59612	1.23679	1.34349	.//_peak_12
chr1	1802502	1803262	761	383.43	4.67881	1.23658	3.11704	.//_peak_86
chr12	1043178	1044011	834	176.75	2.59069	1.23634	1.3392	.//_peak_349
chr3	641022	642331	1310	192.99	2.77003	1.23628	1.49354	.//_peak_1155
chr5	832573	833267	695	176.74	2.59037	1.23628	1.339	.//_peak_1428
chr5	629925	630486	562	207.22	2.88793	1.23607	1.59218	.//_peak_1425
chr6	993181	993623	443	176.68	2.58471	1.23582	1.33453	.//_peak_1505
chr14	42226	42823	598	176.66	2.58166	1.23572	1.33176	.//_peak_390
chr1	760265	762816	2552	176.65	2.58393	1.23566	1.33403	.//_peak_15
chr3	200971	201234	264	176.65	2.58176	1.23566	1.33194	.//_peak_1128
chr12	548113	548367	255	176.62	2.58142	1.23541	1.33209	.//_peak_331
chr5	424512	425759	1248	176.61	2.5749	1.23536	1.32601	.//_peak_1415
chr16	750229	751373	1145	194.03	2.75881	1.23523	1.48366	.//_peak_706
chr7	105673	107111	1439	273.4	3.6178	1.23522	2.21001	.//_peak_1549
chr16	227042	227502	461	176.57	2.5753	1.2351	1.32688	.//_peak_676
chr4	78981	79441	461	322.06	4.12547	1.2351	2.64261	.//_peak_1285
chr17	229604	230338	735	224.89	3.0856	1.23507	1.75826	.//_peak_748
chr2	377302	377607	306	176.46	2.56346	1.23431	1.31713	.//_peak_868
chr20	39860	40888	1029	198.13	2.78891	1.23428	1.5092	.//_peak_922
chr8	943025	943713	689	251.01	3.31575	1.23414	1.95016	.//_peak_1723
chr16	638657	640102	1446	176.41	2.5568	1.23395	1.31148	.//_peak_700
chr11	262364	262620	257	195.01	2.74935	1.23388	1.47494	.//_peak_204
chr13	568120	568962	843	176.39	2.5546	1.23382	1.3096	.//_peak_366
chr18	177797	179707	1911	176.38	2.55691	1.23374	1.31194	.//_peak_815
chr15	223127	224055	929	177.14	2.5623	1.23363	1.31738	.//_peak_574
chr3	1491885	1492612	728	176.36	2.54927	1.23362	1.30492	.//_peak_1252
chr6	1003830	1004275	446	176.35	2.54827	1.23356	1.30407	.//_peak_1506
chr9	722261	722699	439	176.35	2.54854	1.23351	1.30444	.//_peak_1772
chr16	462302	462606	305	176.33	2.54615	1.23342	1.30232	.//_peak_689
chr6	1186914	1187616	703	176.32	2.55116	1.23335	1.30722	.//_peak_1523
chr8	945899	952913	7015	342.05	4.35507	1.23333	2.84868	.//_peak_1724
chr7	108214	110381	2168	270.08	3.51209	1.23324	2.11734	.//_peak_1550
chr3	426031	426467	437	176.41	2.54185	1.23314	1.29914	.//_peak_1133
chr5	352353	352961	609	176.4	2.53913	1.23283	1.29686	.//_peak_1410
chr14	746532	747454	923	179.11	2.56691	1.23278	1.32245	.//_peak_493
chr4	123359	123678	320	176.24	2.53653	1.23277	1.2944	.//_peak_1294
chr3	649104	650470	1367	199.06	2.77046	1.2326	1.49478	.//_peak_1157
chr10	893402	894054	653	176.18	2.52997	1.23236	1.28891	.//_peak_143
chr1	1360093	1361362	1270	176.17	2.52853	1.23231	1.28763	.//_peak_45
chr3	957144	957444	301	182.91	2.59751	1.23227	1.34961	.//_peak_1186
chr21	86803	87383	581	176.15	2.53343	1.23218	1.29257	.//_peak_975
chr15	367368	367735	368	176.23	2.53532	1.23216	1.29455	.//_peak_604
chr11	208602	209093	492	181.28	2.57738	1.23197	1.33258	.//_peak_191
chr7	763416	763906	491	181.39	2.57551	1.23178	1.33025	.//_peak_1637
chr14	356369	357342	974	176.19	2.52185	1.23174	1.28257	.//_peak_429
chr7	872437	873162	726	212.06	2.87993	1.23169	1.58382	.//_peak_1643
chr3	909360	910442	1083	176.06	2.51672	1.23156	1.27785	.//_peak_1179
chr2	1092090	1093046	957	176.88	2.52216	1.23133	1.28388	.//_peak_901
chr18	134137	134573	437	176.03	2.51363	1.23132	1.27534	.//_peak_807
chr5	218469	218819	351	184.49	2.59968	1.23125	1.35115	.//_peak_1396
chr14	582766	584509	1744	179.65	2.55179	1.23111	1.31027	.//_peak_463
chr18	219249	220118	870	175.97	2.50728	1.23092	1.27005	.//_peak_817
plasmid	15178	15562	385	38701.7	427.492	1.2307	423.644	.//_peak_1856
chr12	620445	621033	589	222.5	3.00787	1.23068	1.69471	.//_peak_336
chr16	523357	523713	357	175.93	2.50678	1.2306	1.27019	.//_peak_693
chr15	391410	392029	620	198.46	2.73494	1.23049	1.46405	.//_peak_607
chr5	635352	635601	250	175.9	2.50058	1.2304	1.26466	.//_peak_1426
chr3	330233	331064	832	175.89	2.49892	1.23032	1.26324	.//_peak_1131
chr21	130551	131226	676	210.34	2.84492	1.23024	1.55559	.//_peak_979
chr14	66149	66666	518	175.87	2.49675	1.23023	1.26134	.//_peak_392
chr15	251411	252247	837	298.42	3.73625	1.22989	2.30906	.//_peak_580
chr1	1088134	1088741	608	175.81	2.48895	1.22976	1.25479	.//_peak_34
chr14	973614	974620	1007	176.74	2.49851	1.22943	1.26403	.//_peak_527
chr2	1045805	1046927	1123	175.97	2.48792	1.22939	1.25456	.//_peak_896
chr10	230528	231458	931	175.75	2.48494	1.22938	1.25169	.//_peak_99
chr10	1068140	1069255	1116	175.7	2.48148	1.22903	1.24908	.//_peak_150
chr12	134719	134974	256	175.7	2.47947	1.229	1.24723	.//_peak_316
chr3	1512638	1514394	1757	175.7	2.48047	1.229	1.24816	.//_peak_1253
chr10	679343	679606	264	175.68	2.47876	1.22892	1.24671	.//_peak_133
chr20	264624	266155	1532	207.72	2.79657	1.2289	1.51518	.//_peak_955
chr4	403464	404071	608	175.68	2.47619	1.22887	1.24432	.//_peak_1307
chr14	141358	141883	526	175.67	2.48223	1.22879	1.25021	.//_peak_398
chr3	581273	581777	505	175.67	2.47809	1.22878	1.24636	.//_peak_1147
chr21	258062	258406	345	198.91	2.70854	1.22876	1.44122	.//_peak_1003
chr14	268967	270172	1206	185.62	2.57632	1.22837	1.33302	.//_peak_415
chr7	868702	869205	504	175.56	2.46676	1.22808	1.23685	.//_peak_1642
chr7	99653	101545	1893	305.93	3.77638	1.22801	2.34356	.//_peak_1548
chr3	1438971	1439518	548	175.76	2.46793	1.228	1.2419	.//_peak_1243
chr8	882700	884180	1481	329.19	3.94626	1.22785	2.48556	.//_peak_1716
chr7	743460	744373	914	175.52	2.46185	1.2278	1.23273	.//_peak_1635
chr21	135230	136309	1080	186.42	2.56867	1.22768	1.32523	.//_peak_980
chr14	484210	484872	663	182.91	2.53323	1.22756	1.29559	.//_peak_445
chr8	966682	966953	272	298.36	3.62919	1.22754	2.21299	.//_peak_1726
chr21	140837	141941	1105	179.88	2.49887	1.22746	1.26875	.//_peak_981
chr7	162447	164826	2380	284.87	3.54334	1.22744	2.14517	.//_peak_1558
chr5	268054	268777	724	175.47	2.45419	1.22739	1.22623	.//_peak_1399
chr11	766449	767130	682	211.7	2.81601	1.22725	1.53242	.//_peak_286
chr12	394407	394690	284	175.43	2.45074	1.22716	1.22333	.//_peak_323
chr26	168624	169713	1090	179.72	2.48938	1.22708	1.25915	.//_peak_1109
chr11	703562	704941	1380	220.75	2.89739	1.22704	1.59966	.//_peak_278
chr5	1554863	1555438	576	175.41	2.44881	1.22703	1.22176	.//_peak_1460
chr8	453284	454398	1115	175.41	2.4501	1.227	1.22305	.//_peak_1677
chr3	578813	579241	429	175.39	2.44706	1.2269	1.22035	.//_peak_1146
chr18	43763	44391	629	175.89	2.45112	1.22688	1.22419	.//_peak_803
chr10	613742	614080	339	175.38	2.44599	1.22679	1.21955	.//_peak_129
chr5	78793	81719	2927	267.02	3.34617	1.22652	1.97832	.//_peak_1389
chr6	463178	464015	838	175.29	2.4373	1.22617	1.21242	.//_peak_1479
chr2	250664	251040	377	176.61	2.44996	1.22605	1.22797	.//_peak_862
chr21	457770	458586	817	188.06	2.55964	1.22599	1.31734	.//_peak_1035
chr1	1232389	1233539	1151	175.22	2.43009	1.2257	1.20646	.//_peak_37
chr3	1475911	1477892	1982	176.68	2.44555	1.22568	1.22061	.//_peak_1249
chr17	307381	308730	1350	198.73	2.66011	1.22563	1.40176	.//_peak_765
chr17	432798	433455	658	231.77	2.97477	1.22551	1.66377	.//_peak_784
chr3	467242	468527	1286	175.42	2.42953	1.2253	1.20726	.//_peak_1136
chr5	617084	617741	658	175.16	2.42438	1.22527	1.20188	.//_peak_1424
chr12	1136984	1137888	905	175.04	2.41375	1.22441	1.19336	.//_peak_352
chr14	616709	619056	2348	175.25	2.41541	1.22441	1.19476	.//_peak_468
chr6	499675	499953	279	175.01	2.40755	1.22421	1.18785	.//_peak_1481
chr17	63473	64512	1040	228.24	2.92342	1.22418	1.62173	.//_peak_721
chr2	14302	14607	306	178.85	2.44331	1.22408	1.22153	.//_peak_849
chr1	846968	847850	883	174.98	2.40872	1.224	1.18931	.//_peak_24
chr17	176460	178355	1896	243.64	3.06693	1.22396	1.74201	.//_peak_737
chr25	72256	72844	589	281.5	3.40849	1.22389	2.02854	.//_peak_1101
chr4	891513	892460	948	174.93	2.40252	1.22364	1.18415	.//_peak_1334
chr11	593014	593651	638	175.2	2.403	1.22358	1.18542	.//_peak_260
chr13	332108	332639	532	174.9	2.39671	1.22347	1.17891	.//_peak_357
chr4	598464	599305	842	174.88	2.39662	1.22335	1.17905	.//_peak_1318
chr7	538974	539883	910	175.28	2.39877	1.22328	1.18317	.//_peak_1614
chr16	766959	767563	605	358.02	4.10066	1.22325	2.61581	.//_peak_709
chr11	433755	434449	695	192.39	2.55639	1.22308	1.31449	.//_peak_231
chr5	278671	279314	644	174.84	2.39103	1.22305	1.17433	.//_peak_1400
chr6	116528	116787	260	174.82	2.39023	1.22294	1.17375	.//_peak_1473
chr3	1223944	1224923	980	174.8	2.38789	1.22275	1.17188	.//_peak_1214
chr9	322661	323551	891	174.76	2.38298	1.22251	1.16769	.//_peak_1754
chr18	131261	131976	716	174.75	2.38137	1.22244	1.16628	.//_peak_806
chr4	1361228	1361609	382	174.74	2.37972	1.22235	1.16489	.//_peak_1367
chr9	662789	663577	789	174.73	2.38023	1.22224	1.16556	.//_peak_1768
chr13	674190	674629	440	174.67	2.37378	1.22184	1.16017	.//_peak_372
chr18	79398	80273	876	174.67	2.37435	1.22184	1.16072	.//_peak_805
chr10	774090	775110	1021	174.65	2.37247	1.22175	1.15908	.//_peak_138
chr7	613140	613537	398	174.66	2.37138	1.22164	1.15843	.//_peak_1625
chr7	437420	437982	563	201.59	2.61922	1.22156	1.36727	.//_peak_1597
chr15	94157	96146	1990	197.2	2.55747	1.22148	1.31409	.//_peak_555
chr4	1417001	1417691	691	174.63	2.36692	1.2214	1.15519	.//_peak_1372
chr4	226431	227257	827	174.54	2.35952	1.22098	1.14829	.//_peak_1300
chr12	237647	238042	396	174.53	2.35947	1.22091	1.14835	.//_peak_318
chr6	1095053	1095544	492	290.02	3.43695	1.22088	2.05365	.//_peak_1513
chr14	636536	637309	774	182.18	2.42811	1.22086	1.20723	.//_peak_472
chr4	482327	482771	445	536.46	5.75129	1.22086	4.06235	.//_peak_1309
chr10	734552	734921	370	174.51	2.35738	1.22073	1.14666	.//_peak_135
chr20	493877	494455	579	174.49	2.35393	1.22061	1.14369	.//_peak_974
chr9	565368	565854	487	174.49	2.35389	1.22059	1.14363	.//_peak_1763
chr4	325784	326212	429	174.47	2.35246	1.22044	1.14254	.//_peak_1302
chr11	363400	364483	1084	200.28	2.58514	1.22037	1.33864	.//_peak_220
chr9	1191107	1191663	557	205.42	2.62964	1.22006	1.37573	.//_peak_1840
chr11	169837	171305	1469	206.45	2.6456	1.2199	1.38995	.//_peak_183
chr21	315778	316061	284	174.38	2.34317	1.21984	1.13488	.//_peak_1016
chr1	1414843	1415954	1112	174.33	2.33826	1.21948	1.13087	.//_peak_50
chr4	86046	86316	271	336.3	3.82819	1.21919	2.38528	.//_peak_1287
chr10	1094125	1095268	1144	174.26	2.33153	1.21898	1.12539	.//_peak_152
chr6	1049368	1050444	1077	174.24	2.33056	1.21889	1.12463	.//_peak_1508
chr11	399597	400589	993	174.31	2.33038	1.21887	1.12494	.//_peak_224
chr16	499805	500201	397	174.23	2.32912	1.2188	1.12342	.//_peak_692
chr9	1021701	1022692	992	203.22	2.59337	1.21877	1.34556	.//_peak_1817
chr5	1348050	1348560	511	174.21	2.32739	1.21866	1.12209	.//_peak_1450
[truncated: 62 more rows]
