# Supplementary material for: Dual Role of Entamoeba histolytica KERP2 in Regulating Gene Expression and Modulating Host Cell Function for Intestinal Colonization
Source: Research Square preprint supplement (doi:10.21203/rs.3.rs-6191032/v1), 2025-04-28
Supplement: Supplementary file 2 [file 1423c0eb8af80410a7799595.xlsx]

## Sheet: Table S1
Table S2. RNA-seq of KERPgs & psAP-mock
Gene name	psAP.Mock.1_TMM	psAP.Mock.2_TMM	psAP.Mock.3_TMM	psAP.K2gs.1_TMM	psAP.K2gs.2_TMM	psAP.K2gs.3_TMM	p.value	q.value	logFC	FC	ranking
EHI_020720	0	0	0	7.87169	0.979349	4.68785	0.000562066	0.0370249	5.2376	37.7289	116
EHI_197430	0	0	0	6.99706	1.9587	0	0.0106314	0.266434	4.66561	25.3799	304
EHI_165450	0	0	0	0.874632	1.9587	4.68785	0.0126129	0.293433	4.38358	20.8733	329
EHI_138490	0	0	0	3.49853	2.93805	0.937569	0.0213342	0.38858	4.37676	20.7748	420
EHI_043130	0	0	0	6.12243	0.979349	0	0.0303983	0.463302	4.3546	20.458	501
EHI_057550	0	0	0	3.49853	1.9587	0.937569	0.0395094	0.508297	4.19171	18.2739	594
EHI_153590	0	0	0	5.24779	0.979349	0	0.0478278	0.536172	4.17702	18.0887	682
EHI_077280	0	0.914349	0	0	16.6489	6.56298	0.00127577	0.0664266	4.02445	16.2734	147
EHI_161170	0	0	0	0	0.979349	4.68785	0.0459382	0.533163	3.99386	15.932	658
EHI_130060	0	0	0	0.874632	2.93805	1.87514	0.0394247	0.508297	3.99204	15.912	593
EHI_050330	0	0	0	1.74926	2.93805	0.937569	0.039405	0.508297	3.9892	15.8806	592
EHI_075430	0	0	0	1.74926	0.979349	2.81271	0.0393314	0.508297	3.98578	15.8431	591
EHI_120750	0	0	0	3.49853	0	1.87514	0.0420274	0.520908	3.97636	15.74	613
EHI_153620	0	0	0	0	1.9587	2.81271	0.0756211	0.640371	3.74903	13.4453	902
EHI_173610	0	0	0	0.874632	2.93805	0.937569	0.0744643	0.639674	3.74724	13.4287	891
EHI_005110	0	0	0	1.74926	0	2.81271	0.0757167	0.640371	3.73788	13.3418	905
EHI_078960	0	0	0	2.6239	0	1.87514	0.0754906	0.640371	3.73451	13.3106	900
EHI_154740	1.35169	0	0	9.62095	0	6.56298	0.00325779	0.129198	3.50297	11.337	193
EHI_021880	0	0	0	0	3.91739	0	0.151139	0.77889	3.46378	11.0332	1484
EHI_107340	0	0	0	0.874632	2.93805	0	0.142558	0.76995	3.45265	10.9484	1416
EHI_197000	0	0	0	0	0.979349	2.81271	0.142184	0.76995	3.45172	10.9414	1408
EHI_123850	0	0	0	0.874632	0.979349	1.87514	0.138787	0.76995	3.44762	10.9103	1374
EHI_092400	0	0	0	1.74926	1.9587	0	0.140584	0.76995	3.44628	10.9002	1396
EHI_064920	0	0	0	1.74926	0.979349	0.937569	0.138707	0.76995	3.44438	10.8858	1372
EHI_015960	0	0	0	1.74926	0	1.87514	0.140558	0.76995	3.44193	10.8673	1395
EHI_052830	0	0	0	2.6239	0.979349	0	0.142205	0.76995	3.43994	10.8524	1412
EHI_113440	0	0	0	2.6239	0	0.937569	0.142299	0.76995	3.43753	10.8343	1413
EHI_080890	1.35169	4.57175	2.1379	30.6121	30.3598	31.8773	3.07e-14	2.94e-11	3.37217	10.3544	8
EHI_014130	0	0	0	0	2.93805	0	0.271517	0.884361	3.08676	8.49588	2349
EHI_039720	0	0	0	0	0.979349	1.87514	0.265915	0.882727	3.07941	8.45271	2303
EHI_017900	0	0	0	0.874632	1.9587	0	0.266166	0.882727	3.07791	8.44392	2305
EHI_174490	0	0	0	0	0	2.81271	0.271369	0.884361	3.07763	8.44227	2345
EHI_055850	0	0	0	0.874632	0.979349	0.937569	0.264154	0.882128	3.07551	8.4299	2292
EHI_157150	0	0	1.06895	4.37316	6.85544	0	0.0164684	0.339712	2.98463	7.91524	371
EHI_024230	5.40676	9.14349	12.8274	74.3437	67.575	77.8182	3.52e-22	8.98e-19	2.95299	7.74351	3
EHI_045230	1.35169	0	0	7.87169	0.979349	1.87514	0.017264	0.346821	2.94191	7.68428	381
EHI_034830	2.70338	0.914349	2.1379	9.62095	16.6489	16.8762	3.18e-06	0.000565636	2.89469	7.43685	43
EHI_119760	0	0	1.06895	4.37316	1.9587	3.75028	0.0178321	0.353545	2.85557	7.23788	386
EHI_074550	0	0.914349	0	6.12243	1.9587	0.937569	0.0359553	0.498827	2.72443	6.609	551
EHI_068150	0	0.914349	1.06895	8.74632	3.91739	2.81271	0.00392557	0.145856	2.6649	6.34182	206
EHI_055140	0	0.914349	0	2.6239	1.9587	3.75028	0.0506275	0.550944	2.58704	6.00863	701
EHI_073500	0	0	0	0	1.9587	0	0.512357	0.974958	2.58045	5.98127	4015
EHI_188610	0	0	0	0	0.979349	0.937569	0.510568	0.974958	2.5771	5.96737	3994
EHI_118220	0	0	0	0	0	1.87514	0.512379	0.974958	2.5749	5.95828	4018
EHI_042870	0	0	0	0.874632	0.979349	0	0.510652	0.974958	2.57309	5.95081	3995
EHI_118130	0	0	0	0.874632	0	0.937569	0.51068	0.974958	2.57067	5.94084	3998
EHI_193470	0	0	0	1.74926	0	0	0.512336	0.974958	2.56568	5.92035	4014
EHI_051910	0	0	1.06895	6.12243	0.979349	0.937569	0.062735	0.600968	2.56338	5.91092	799
EHI_071350	2.70338	0	1.06895	2.6239	9.79349	8.43812	0.00459976	0.160761	2.51385	5.71143	219
EHI_180930	0	2.74305	1.06895	7.87169	13.7109	4.68785	0.000646442	0.0410192	2.50939	5.69379	120
EHI_188740	1.35169	1.8287	1.06895	2.6239	9.79349	14.0635	0.00118086	0.0623331	2.50407	5.67285	145
EHI_012440	4.05507	6.40044	5.34474	29.7375	37.2152	26.2519	8.26e-10	2.53e-07	2.49491	5.63692	25
EHI_114920	14.8686	20.1157	25.6548	140.816	109.687	90.0066	5.57e-19	8.52e-16	2.4657	5.52394	5
EHI_037240	0	0	1.06895	0	4.89674	2.81271	0.0590378	0.588472	2.4335	5.40203	767
EHI_047820	0	0	1.06895	0.874632	3.91739	2.81271	0.0533674	0.559863	2.42629	5.3751	729
EHI_129730	0	0	1.06895	1.74926	1.9587	3.75028	0.086534	0.671887	2.42043	5.35331	983
EHI_167060	10.8135	54.861	64.1369	244.897	207.622	213.766	5.83e-12	3.43e-09	2.32738	5.01895	13
EHI_187250	1.35169	0.914349	0	4.37316	1.9587	5.62541	0.0215549	0.38858	2.28615	4.87754	424
EHI_183400	9.46183	30.1735	29.9306	110.204	126.336	115.321	2.78e-17	3.55e-14	2.27936	4.85462	6
EHI_010030	16.2203	36.574	36.3442	167.055	142.985	135.01	9.83e-21	1.88e-17	2.27642	4.84476	4
EHI_196700	1.35169	3.6574	4.27579	6.12243	14.6902	26.2519	0.000629699	0.0405018	2.23917	4.72124	119
EHI_160930	28.3855	28.3448	25.6548	133.819	133.191	120.009	6.58e-24	2.52e-20	2.22777	4.68409	2
EHI_074080	6.75845	4.57175	2.1379	20.9912	19.587	21.5641	1.59e-06	0.000311486	2.22102	4.66222	39
EHI_036490	1.35169	0.914349	0	4.37316	2.93805	3.75028	0.0322952	0.474033	2.1757	4.51805	521
EHI_036390	1.35169	0	0	6.12243	0	0	0.194815	0.82376	2.16787	4.49359	1808
EHI_159470	1.35169	0	1.06895	6.12243	0.979349	3.75028	0.0379136	0.505559	2.1585	4.46449	574
EHI_025600	1.35169	0.914349	7.48264	13.1195	11.7522	19.689	0.00016764	0.0133658	2.14684	4.42858	96
EHI_169350	10.8135	11.8865	2.1379	34.9853	42.112	30.0022	1.3e-07	2.99e-05	2.0892	4.25513	33
EHI_044500	1.35169	0.914349	0	0.874632	6.85544	2.81271	0.0628893	0.601416	2.06934	4.19694	800
EHI_169470	1.35169	0	1.06895	2.6239	2.93805	4.68785	0.0525374	0.555416	2.05204	4.14692	724
EHI_157460	1.35169	2.74305	4.27579	20.9912	7.83479	7.50055	0.00185822	0.0881552	2.04299	4.121	161
EHI_197520	1.35169	0	0	0	2.93805	2.81271	0.15067	0.77889	2.02426	4.06783	1480
EHI_072520	0	0	1.06895	2.6239	0	2.81271	0.150493	0.77889	2.02045	4.05711	1478
EHI_202700	1.35169	0.914349	6.41369	10.4956	13.7109	12.1884	0.000648461	0.0410192	2.01698	4.04734	121
EHI_144590	1.35169	0	0	2.6239	1.9587	0.937569	0.14603	0.776116	2.01515	4.04221	1440
EHI_146120	0	0.914349	1.06895	0	5.87609	3.75028	0.0651617	0.609142	1.95122	3.86702	818
EHI_013130	1.35169	1.8287	3.20685	8.74632	7.83479	9.37569	0.00364602	0.138839	1.94015	3.83745	201
EHI_118650	2.70338	0	2.1379	2.6239	11.7522	3.75028	0.0377065	0.504821	1.92808	3.80548	570
EHI_193530	1.35169	0	1.06895	4.37316	1.9587	2.81271	0.0841022	0.67147	1.91355	3.76734	958
EHI_196760	2.70338	2.74305	3.20685	13.1195	10.7728	9.37569	0.00116578	0.0623331	1.90011	3.73243	143
EHI_170440	2.70338	0.914349	0	6.12243	3.91739	2.81271	0.0727974	0.634283	1.8696	3.6543	877
EHI_020840	0	7.31479	4.27579	12.2449	19.587	15.0011	0.000263577	0.0192135	1.84254	3.58641	105
EHI_137070	2.70338	1.8287	2.1379	8.74632	10.7728	4.68785	0.00931835	0.250255	1.83178	3.55975	285
EHI_108480	0	0.914349	0	0	3.91739	0.937569	0.251822	0.871243	1.80608	3.49691	2210
EHI_092250	0	0	0	0	0.979349	0	1	1	1.80086	3.48429	7327
EHI_042860	0	0	0	0	0	0.937569	1	1	1.79817	3.4778	7396
EHI_195270	1.35169	0.914349	1.06895	1.74926	9.79349	0.937569	0.0820392	0.664474	1.79556	3.4715	945
EHI_149530	0	0.914349	0	0.874632	2.93805	0.937569	0.243236	0.864082	1.7955	3.47135	2154
EHI_054540	0	0	0	0.874632	0	0	1	1	1.79367	3.46695	7396
EHI_009580	0	0	1.06895	1.74926	1.9587	0.937569	0.240738	0.861951	1.78217	3.43943	2136
EHI_035740	1.35169	0	1.06895	0.874632	3.91739	3.75028	0.135315	0.76995	1.77774	3.42888	1339
EHI_118110	1.35169	0	1.06895	2.6239	1.9587	3.75028	0.131177	0.76109	1.77163	3.4144	1318
EHI_142570	2.70338	0	0	1.74926	2.93805	3.75028	0.262212	0.881824	1.7655	3.39991	2273
EHI_126660	1.35169	0	0	2.6239	0	1.87514	0.245302	0.865932	1.76325	3.39462	2167
EHI_104220	0	2.74305	4.27579	5.24779	14.6902	6.56298	0.00919108	0.249344	1.75913	3.38495	282
EHI_069320	5.40676	0.914349	2.1379	11.3702	2.93805	12.1884	0.014252	0.313094	1.73475	3.32821	348
EHI_192040	5.40676	11.8865	0	18.3673	22.525	18.7514	0.00124306	0.0651668	1.7058	3.26209	146
EHI_183290	5.40676	4.57175	0	8.74632	11.7522	12.1884	0.00342451	0.13238	1.69974	3.24843	198
EHI_151540	18.9237	10.0578	4.27579	51.6033	12.7315	40.3155	0.00297474	0.121758	1.68202	3.20877	187
EHI_180790	1.35169	0.914349	1.06895	2.6239	2.93805	5.62541	0.0775973	0.64928	1.6667	3.17487	914
EHI_018290	2.70338	3.6574	2.1379	5.24779	14.6902	8.43812	0.0113092	0.273365	1.65837	3.15661	316
EHI_148620	12.1652	26.5161	26.7237	72.5945	68.5544	71.2553	7.98e-10	2.53e-07	1.65196	3.14261	24
EHI_079610	0	0.914349	1.06895	1.74926	0	5.62541	0.226358	0.850364	1.62539	3.08525	2036
EHI_137900	0	0.914349	1.06895	1.74926	1.9587	3.75028	0.205401	0.837133	1.6248	3.08399	1878
EHI_196740	1.35169	2.74305	0	3.49853	8.81414	1.87514	0.0618661	0.600968	1.62442	3.08318	785
EHI_072530	1.35169	0	1.06895	4.37316	0.979349	1.87514	0.209998	0.842674	1.60011	3.03167	1906
EHI_196780	0	13.7152	10.6895	19.2419	32.3185	26.2519	0.00204936	0.0939271	1.57213	2.97343	167
EHI_057960	1.35169	3.6574	1.06895	4.37316	12.7315	2.81271	0.0359185	0.498827	1.5651	2.95898	549
EHI_189450	2.70338	2.74305	2.1379	9.62095	4.89674	8.43812	0.0222624	0.392618	1.56299	2.95466	434
EHI_164190	1.35169	0	2.1379	3.49853	4.89674	1.87514	0.216997	0.846409	1.53964	2.90723	1956
EHI_178000	2.70338	0.914349	0	1.74926	2.93805	5.62541	0.222774	0.846567	1.53851	2.90494	2014
EHI_095450	8.11014	0.914349	8.55159	17.4926	5.87609	26.2519	0.0273088	0.439785	1.53732	2.90254	475
EHI_153540	1.35169	1.8287	3.20685	6.12243	7.83479	5.62541	0.0332041	0.480424	1.53424	2.89635	529
EHI_114360	6.75845	7.31479	8.55159	19.2419	20.5663	26.2519	0.000130661	0.0109899	1.52166	2.8712	91
EHI_000020	1.35169	3.6574	2.1379	10.4956	8.81414	2.81271	0.0241181	0.410576	1.51795	2.86383	449
EHI_183180	1.35169	0	7.48264	6.99706	9.79349	8.43812	0.0316383	0.468385	1.48744	2.80391	517
EHI_034560	0	0	1.06895	0.874632	0	2.81271	0.401264	0.944743	1.48543	2.80001	3246
EHI_186360	1.35169	0	0	0	2.93805	0.937569	0.40125	0.944743	1.48309	2.79546	3245
EHI_112390	1.35169	0	0	0.874632	2.93805	0	0.401618	0.944743	1.47917	2.78788	3250
EHI_200850	1.35169	0	0	0	0.979349	2.81271	0.400909	0.944743	1.47863	2.78683	3243
EHI_114000	2.70338	3.6574	0	3.49853	1.9587	13.126	0.0695305	0.617933	1.47509	2.78002	861
EHI_156390	2.70338	3.6574	18.1721	25.3643	27.4218	16.8762	0.00726689	0.217177	1.47438	2.77863	256
EHI_006670	424.431	510.207	630.68	1552.47	1380.88	1418.54	3.22e-16	3.52e-13	1.47317	2.77632	7
EHI_189155	0	3.6574	3.20685	5.24779	5.87609	10.3133	0.0287921	0.453446	1.46804	2.76646	486
EHI_050530	6.75845	5.4861	5.34474	17.4926	11.7522	18.7514	0.00202032	0.0931536	1.45182	2.73553	166
EHI_110630	0	0.914349	1.06895	0.874632	3.91739	1.87514	0.210183	0.842674	1.44867	2.72957	1907
EHI_008440	4.05507	3.6574	4.27579	16.618	6.85544	9.37569	0.011726	0.278729	1.447	2.7264	322
EHI_049160	0	1.8287	1.06895	0	2.93805	6.56298	0.203828	0.835591	1.44511	2.72283	1867
EHI_153940	0	0.914349	1.06895	2.6239	1.9587	1.87514	0.314266	0.912515	1.43935	2.71199	2636
EHI_194540	21.627	41.1457	25.6548	92.711	82.2653	70.3177	4.56e-08	1.16e-05	1.43627	2.70619	30
EHI_059860	2.70338	7.31479	9.62054	18.3673	9.79349	27.1895	0.00479401	0.165285	1.43472	2.7033	222
EHI_092510	12.1652	21.03	36.3442	72.5945	45.05	73.1304	2.86e-05	0.00296205	1.432	2.69821	74
EHI_125020	1.35169	0	1.06895	0	1.9587	4.68785	0.219792	0.846409	1.42994	2.69435	1978
EHI_020830	0	3.6574	0	0.874632	10.7728	0	0.265664	0.882727	1.42823	2.69116	2300
EHI_192390	0	2.74305	0	5.24779	1.9587	1.87514	0.186857	0.816077	1.42738	2.68957	1750
EHI_019290	0	2.74305	0	5.24779	0.979349	2.81271	0.190432	0.818139	1.42689	2.68866	1781
EHI_044350	4.05507	4.57175	3.20685	8.74632	14.6902	9.37569	0.00855493	0.240733	1.42562	2.6863	272
EHI_130520	2.70338	0	0	1.74926	2.93805	1.87514	0.379138	0.93747	1.41901	2.67403	3095
EHI_019630	54.0676	18.287	59.8611	138.192	118.501	90.9442	1.81e-05	0.00224655	1.41359	2.66399	61
EHI_143430	398.749	251.446	342.063	876.381	820.694	933.819	5.78e-14	4.91e-11	1.41184	2.66076	9
EHI_140530	1.35169	0.914349	1.06895	3.49853	3.91739	1.87514	0.172882	0.79954	1.41175	2.66059	1655
EHI_064670	6.75845	3.6574	10.6895	18.3673	16.6489	20.6265	0.00110787	0.0610047	1.41114	2.65948	139
EHI_010950	2.70338	1.8287	0	2.6239	9.79349	0	0.267163	0.882929	1.41074	2.65874	2316
EHI_050580	2.70338	2.74305	0	4.37316	8.81414	1.87514	0.0785619	0.651346	1.4029	2.64432	921
EHI_152140	2.70338	0.914349	1.06895	4.37316	4.89674	2.81271	0.177239	0.80414	1.39427	2.62855	1687
EHI_119790	1.35169	0.914349	2.1379	5.24779	0.979349	5.62541	0.109837	0.722245	1.39233	2.62502	1164
EHI_138810	8.11014	28.3448	17.1032	48.9794	47.9881	49.6912	1.93e-05	0.00224655	1.38793	2.61702	64
EHI_139570	68.9362	34.7453	54.5164	129.446	134.171	141.573	1.95e-09	5.73e-07	1.38322	2.6085	26
EHI_141800	6.75845	7.31479	2.1379	13.1195	18.6076	11.2508	0.00449104	0.158763	1.37987	2.60245	216
EHI_092440	6.75845	0.914349	0	0	5.87609	13.126	0.197104	0.827886	1.37689	2.59709	1822
EHI_099860	10.8135	10.9722	19.2411	39.3584	34.2772	32.8149	2.81e-05	0.00294903	1.36451	2.57489	73
EHI_007460	5.40676	1.8287	4.27579	6.99706	5.87609	15.9387	0.0284099	0.450324	1.3607	2.5681	482
EHI_196750	4.05507	4.57175	3.20685	11.3702	10.7728	8.43812	0.0133205	0.301055	1.33585	2.52424	338
EHI_009230	68.9362	43.8888	55.5853	156.559	130.253	130.322	5.78e-10	2.01e-07	1.32935	2.5129	22
EHI_163240	1997.8	9415.97	2067.35	22436.9	6510.71	4838.79	0.0215215	0.38858	1.32534	2.50592	422
EHI_192030	1.35169	2.74305	2.1379	5.24779	8.81414	2.81271	0.0600354	0.593196	1.32428	2.50407	774
EHI_051870	0	5.4861	9.62054	10.4956	9.79349	19.689	0.0193237	0.368838	1.30993	2.4793	400
EHI_089440	10.8135	0	6.41369	10.4956	9.79349	19.689	0.0473643	0.535563	1.30353	2.46832	675
EHI_137370	1.35169	0.914349	3.20685	5.24779	3.91739	4.68785	0.147926	0.776116	1.3002	2.46262	1458
EHI_158270	118.949	104.236	154.998	326.238	286.949	315.023	2.48e-13	1.9e-10	1.29712	2.45738	10
EHI_010000	2.70338	4.57175	3.20685	8.74632	4.89674	13.126	0.0359035	0.498827	1.28909	2.44373	548
EHI_170340	236.546	171.898	281.133	503.788	550.394	619.733	9.94e-12	5.43e-09	1.28262	2.4328	14
EHI_127690	2.70338	6.40044	8.55159	12.2449	20.5663	12.1884	0.00715937	0.214971	1.27579	2.42131	254
EHI_052050	9.46183	10.0578	12.8274	31.4868	27.4218	19.689	0.000599866	0.0389099	1.26826	2.4087	118
EHI_195040	2.70338	11.8865	14.9653	21.8658	31.3392	21.5641	0.00241637	0.105685	1.26531	2.40379	175
EHI_071340	0	4.57175	1.06895	7.87169	0.979349	6.56298	0.118378	0.737484	1.2603	2.39546	1228
EHI_163460	1.35169	0	2.1379	4.37316	1.9587	1.87514	0.424793	0.951576	1.25395	2.38494	3416
EHI_083410	0	2.74305	3.20685	3.49853	7.83479	4.68785	0.083217	0.668537	1.25221	2.38207	952
EHI_180940	5.40676	0	1.06895	1.74926	10.7728	1.87514	0.248567	0.869132	1.25182	2.38142	2189
EHI_200060	13.5169	4.57175	14.9653	20.9912	30.3598	25.3144	0.00284127	0.11692	1.24781	2.37481	186
EHI_170960	1.35169	9.14349	12.8274	26.239	15.6696	15.9387	0.0101356	0.262646	1.24014	2.36221	295
EHI_182800	81.1014	82.2914	117.584	187.171	234.064	243.768	2.85e-10	1.09e-07	1.23825	2.35912	20
EHI_119590	747.485	544.952	740.781	1443.14	1468.04	1878.89	3.61e-11	1.62e-08	1.23778	2.35836	17
EHI_112290	0	0.914349	1.06895	0.874632	1.9587	2.81271	0.317713	0.915727	1.23534	2.35437	2655
EHI_025990	1.35169	0.914349	0	0	3.91739	1.87514	0.325853	0.918226	1.23364	2.3516	2708
EHI_035160	0	0.914349	4.27579	2.6239	8.81414	1.87514	0.16852	0.798913	1.22933	2.34457	1614
EHI_092410	4.05507	0	0	4.37316	1.9587	1.87514	0.435673	0.956306	1.22923	2.34442	3487
EHI_127960	0	0	2.1379	3.49853	0.979349	0.937569	0.48322	0.968413	1.21733	2.32516	3816
EHI_092470	205.457	197.499	261.892	467.054	481.839	585.981	2.43e-12	1.69e-09	1.2062	2.3073	11
EHI_020990	4.05507	1.8287	7.48264	11.3702	9.79349	9.37569	0.02543	0.419485	1.20373	2.30334	464
EHI_095490	2.70338	0	0	2.6239	0.979349	1.87514	0.539072	0.982629	1.20097	2.29894	4196
EHI_048640	4.05507	2.74305	5.34474	12.2449	9.79349	5.62541	0.0387702	0.507906	1.19089	2.28293	581
EHI_105060	48.6609	144.467	94.0675	289.503	179.221	194.077	5.59e-05	0.00548595	1.19035	2.28207	78
EHI_095310	24.3304	1.8287	17.1032	29.7375	23.5044	42.1906	0.038453	0.507906	1.18312	2.27067	577
EHI_061030	1.35169	6.40044	0	6.12243	9.79349	3.75028	0.0899909	0.681971	1.17856	2.26351	1010
EHI_168860	4.05507	1.8287	5.34474	6.12243	6.85544	12.1884	0.0595834	0.591245	1.17542	2.25859	771
EHI_137910	4.05507	1.8287	2.1379	6.12243	4.89674	6.56298	0.105609	0.713926	1.16984	2.24987	1132
EHI_095480	18.9237	0.914349	11.7584	22.7404	18.6076	26.2519	0.0460266	0.533163	1.15949	2.23379	660
EHI_057320	9.46183	4.57175	3.20685	13.1195	9.79349	14.0635	0.027224	0.439785	1.15737	2.2305	472
EHI_180820	4.05507	0.914349	0	2.6239	6.85544	0.937569	0.37697	0.937153	1.14871	2.21715	3078
EHI_147220	4.05507	0	1.06895	1.74926	3.91739	4.68785	0.350768	0.929633	1.14805	2.21614	2888
EHI_020960	0	0.914349	0	0	2.93805	0	0.644173	0.99492	1.13826	2.20115	4950
EHI_159480	14.8686	23.7731	13.8963	34.9853	44.0707	39.3779	0.00019346	0.014957	1.13427	2.19507	99
EHI_085050	333.868	318.194	414.752	802.038	808.942	725.678	2.93e-11	1.4e-08	1.13087	2.1899	16
EHI_158340	1.35169	1.8287	5.34474	7.87169	1.9587	9.37569	0.157406	0.787443	1.12966	2.18807	1530
EHI_093700	0	0.914349	0	0	0.979349	1.87514	0.639788	0.99492	1.12884	2.18683	4905
EHI_166820	6.75845	9.14349	10.6895	20.9912	21.5457	16.8762	0.00415828	0.153017	1.12683	2.18379	208
EHI_199150	0	0.914349	0	0.874632	0	1.87514	0.640032	0.99492	1.12301	2.17801	4909
EHI_020980	4.05507	5.4861	6.41369	4.37316	13.7109	17.8138	0.0459659	0.533163	1.12159	2.17586	659
EHI_197180	1.35169	3.6574	0	2.6239	4.89674	4.68785	0.183984	0.810652	1.12062	2.1744	1735
EHI_164890	21.627	14.6296	20.31	45.4809	37.2152	38.4403	0.00015953	0.0128531	1.12047	2.17418	95
EHI_109120	8.11014	9.14349	14.9653	27.9882	10.7728	31.8773	0.0164146	0.339598	1.12046	2.17417	369
EHI_131920	0	0	1.06895	0.874632	0.979349	0.937569	0.638018	0.99492	1.11555	2.16678	4888
EHI_053210	5.40676	0.914349	5.34474	7.87169	9.79349	6.56298	0.108884	0.72144	1.11342	2.16358	1154
EHI_192600	1.35169	1.8287	2.1379	1.74926	5.87609	4.68785	0.181181	0.807657	1.1125	2.16219	1715
EHI_014910	1.35169	0.914349	1.06895	0	1.9587	5.62541	0.277727	0.887051	1.10996	2.1584	2394
EHI_102280	1.35169	0.914349	3.20685	1.74926	5.87609	4.68785	0.287113	0.895261	1.10774	2.15508	2454
EHI_128900	12.1652	26.5161	19.2411	46.3555	46.0294	36.5652	0.000334152	0.0241283	1.1071	2.15412	106
EHI_051400	1.35169	0	0	0.874632	1.9587	0	0.639688	0.99492	1.10564	2.15194	4904
EHI_104650	1.35169	0	0	0.874632	0.979349	0.937569	0.637988	0.99492	1.10485	2.15077	4887
EHI_075310	0	0	1.06895	2.6239	0	0	0.644016	0.99492	1.10338	2.14858	4948
EHI_051030	27.0338	11.8865	19.2411	35.8599	44.0707	41.253	0.000842254	0.0499737	1.0988	2.14177	129
EHI_188020	18.9237	9.14349	17.1032	32.3614	31.3392	30.0022	0.00149337	0.0747077	1.09006	2.12883	153
EHI_126550	9.46183	10.9722	13.8963	27.1136	13.7109	32.8149	0.00827012	0.236192	1.08795	2.12572	268
EHI_095510	12.1652	3.6574	2.1379	15.7434	13.7109	6.56298	0.0928365	0.687233	1.08588	2.12267	1033
EHI_110720	625.833	779.94	859.434	1647.81	1666.85	1493.55	2.75e-10	1.09e-07	1.08415	2.12013	19
EHI_091680	2.70338	0.914349	0	0.874632	0	6.56298	0.619157	0.994775	1.08032	2.11451	4763
EHI_010850	174.368	239.56	300.374	502.914	462.252	548.478	1.23e-08	3.23e-06	1.07761	2.11054	29
EHI_153520	9.46183	24.6874	10.6895	25.3643	25.4631	46.8785	0.00950404	0.252964	1.07449	2.10598	287
EHI_096430	6.75845	5.4861	9.62054	20.9912	8.81414	15.9387	0.0272388	0.439785	1.07141	2.10148	473
EHI_101420	33.7923	56.6897	23.5169	93.5856	70.5131	78.7558	0.000199532	0.0152722	1.07029	2.09986	100
EHI_117790	4.05507	3.6574	13.8963	24.4897	10.7728	10.3133	0.0670475	0.616563	1.06611	2.09379	830
EHI_059640	0	4.57175	6.41369	10.4956	3.91739	10.3133	0.080062	0.6568	1.06611	2.09377	933
EHI_095440	8.11014	19.2013	19.2411	26.239	38.1946	36.5652	0.00191418	0.0898843	1.06352	2.09002	163
EHI_145850	4.05507	4.57175	5.34474	12.2449	8.81414	8.43812	0.0446064	0.533163	1.05528	2.07812	637
EHI_192820	8.11014	21.9444	4.27579	27.9882	13.7109	31.8773	0.0467732	0.533535	1.0535	2.07555	671
EHI_054110	16.2203	17.3726	25.6548	38.4838	43.0913	41.253	0.000427134	0.0291901	1.03862	2.05426	112
EHI_077110	21.627	25.6018	35.2753	41.1077	39.1739	90.0066	0.00464732	0.161684	1.03442	2.04829	220
EHI_118730	12.1652	10.0578	10.6895	17.4926	29.3805	20.6265	0.0077096	0.225226	1.03381	2.04743	262
EHI_170950	28.3855	24.6874	29.9306	63.8482	46.0294	59.0669	0.000104454	0.00898301	1.03265	2.04578	89
EHI_059440	6.75845	2.74305	14.9653	20.1165	9.79349	19.689	0.0565661	0.578046	1.03174	2.04449	749
EHI_192240	1.35169	5.4861	3.20685	8.74632	7.83479	5.62541	0.0818331	0.664474	1.0285	2.0399	942
EHI_086000	9.46183	0	3.20685	6.99706	8.81414	7.50055	0.171046	0.799432	1.02105	2.02939	1637
EHI_031200	2.70338	1.8287	3.20685	4.37316	4.89674	6.56298	0.190019	0.818139	1.01944	2.02713	1777
EHI_091050	8.11014	0.914349	3.20685	12.2449	4.89674	5.62541	0.18139	0.807657	1.01436	2.02001	1718
EHI_178340	494.719	401.399	548.371	981.337	916.67	1004.14	3.64e-09	1.03e-06	1.00804	2.01117	27
EHI_073160	4.05507	8.22914	3.20685	6.99706	13.7109	12.1884	0.0554688	0.572181	1.00548	2.00761	742
EHI_156690	3603.61	2764.99	4235.17	7483.35	6618.44	7131.15	6.77e-08	1.67e-05	1.00194	2.00269	31
EHI_027350	5.40676	16.4583	5.34474	24.4897	11.7522	20.6265	0.0387018	0.507906	1.00066	2.00091	580
EHI_153250	22.9787	35.6596	45.9648	79.5915	69.5337	62.8171	0.000128503	0.0109285	0.99681	1.99558	90
EHI_074560	0	0.914349	1.06895	0	0.979349	3.75028	0.486368	0.968413	0.994905	1.99295	3840
EHI_154290	2.70338	8.22914	2.1379	8.74632	12.7315	6.56298	0.0682183	0.616563	0.993162	1.99054	845
EHI_084160	1.35169	0.914349	0	0.874632	2.93805	0.937569	0.479077	0.968309	0.982906	1.97644	3786
EHI_097900	0	0	2.1379	1.74926	2.93805	0	0.485389	0.968413	0.982316	1.97563	3830
EHI_033860	0	2.74305	0	0	4.89674	1.87514	0.403621	0.944743	0.971802	1.96129	3266
EHI_135320	1.35169	0.914349	0	3.49853	0.979349	0	0.485785	0.968413	0.968196	1.95639	3833
EHI_148960	2.70338	0	0	1.74926	0.979349	1.87514	0.480187	0.968413	0.958066	1.9427	3791
EHI_045380	9.46183	12.8009	9.62054	19.2419	20.5663	23.4392	0.00844515	0.239404	0.956411	1.94048	270
EHI_159550	17.572	10.9722	19.2411	25.3643	36.2359	30.0022	0.0059508	0.190101	0.953213	1.93618	236
EHI_065730	6.75845	1.8287	1.06895	6.99706	1.9587	8.43812	0.25681	0.876793	0.953039	1.93595	2241
EHI_095300	13.5169	13.7152	27.7927	43.7316	30.3598	32.8149	0.00601517	0.190101	0.951693	1.93414	242
EHI_089460	0	3.6574	3.20685	6.99706	2.93805	4.68785	0.182399	0.809874	0.948114	1.92935	1723
EHI_145280	0	1.8287	1.06895	0	2.93805	3.75028	0.384442	0.938375	0.946091	1.92665	3131
EHI_067080	52.7159	27.4305	54.5164	67.3467	84.224	105.008	0.000907761	0.0530382	0.945807	1.92627	131
EHI_124330	1600.4	1948.48	2411.55	4056.54	4014.35	3402.44	4.1e-07	8.47e-05	0.944257	1.9242	37
EHI_011240	4.05507	9.14349	3.20685	18.3673	5.87609	8.43812	0.115922	0.73146	0.942558	1.92193	1212
EHI_031950	91.9149	59.4327	79.1022	98.8334	136.129	203.452	0.000447533	0.0300475	0.936032	1.91326	114
EHI_062750	6.75845	6.40044	14.9653	13.9941	27.4218	13.126	0.0508973	0.551796	0.93511	1.91204	706
EHI_137970	70.2879	103.321	112.24	210.786	171.386	168.762	2.52e-06	0.000470677	0.933984	1.91055	41
EHI_008430	20.2754	8.22914	8.55159	34.1107	12.7315	21.5641	0.0690152	0.617649	0.933597	1.91003	854
EHI_000460	21.627	17.3726	6.41369	38.4838	24.4837	22.5017	0.0272681	0.439785	0.930619	1.90609	474
EHI_034810	4.05507	0.914349	5.34474	9.62095	0.979349	8.43812	0.252526	0.871243	0.929695	1.90487	2218
EHI_170430	8.11014	5.4861	4.27579	10.4956	11.7522	11.2508	0.0833269	0.668537	0.927367	1.9018	954
EHI_117870	35.1439	32.9166	60.9301	66.472	96.9555	82.5061	0.000741816	0.0450624	0.925021	1.89871	126
EHI_081625	1.35169	0.914349	1.06895	0.874632	2.93805	2.81271	0.373904	0.934028	0.924957	1.89863	3064
EHI_160450	0	0.914349	2.1379	4.37316	0.979349	0.937569	0.541253	0.982629	0.920307	1.89252	4207
EHI_191760	8.11014	3.6574	6.41369	11.3702	8.81414	13.126	0.0888176	0.680448	0.918776	1.89051	998
EHI_052120	14.8686	10.9722	18.1721	34.9853	27.4218	19.689	0.0139513	0.310417	0.911547	1.88106	344
EHI_151590	40.5507	30.1735	29.9306	75.2184	58.7609	52.5039	0.000565968	0.0370249	0.907833	1.87623	117
EHI_103770	0	6.40044	5.34474	9.62095	3.91739	10.3133	0.140007	0.76995	0.90169	1.86825	1390
EHI_030140	4.05507	13.7152	3.20685	19.2419	10.7728	11.2508	0.0818198	0.664474	0.900594	1.86683	941
EHI_085680	6.75845	13.7152	11.7584	19.2419	20.5663	22.5017	0.0161421	0.337572	0.895312	1.86001	366
EHI_151890	1.35169	1.8287	10.6895	2.6239	13.7109	10.3133	0.260739	0.88004	0.895299	1.86	2264
EHI_179050	1.35169	2.74305	2.1379	0	8.81414	3.75028	0.329563	0.918226	0.892596	1.85651	2737
EHI_181550	6.75845	5.4861	7.48264	7.87169	16.6489	12.1884	0.0925109	0.687233	0.883788	1.84521	1029
EHI_070780	16.2203	13.7152	10.6895	27.9882	28.4011	17.8138	0.0146143	0.317209	0.878193	1.83807	352
EHI_033120	1.35169	0.914349	2.1379	6.12243	1.9587	0	0.446146	0.95928	0.872243	1.83051	3559
EHI_107160	5.40676	4.57175	1.06895	12.2449	4.89674	2.81271	0.256382	0.876775	0.871273	1.82928	2238
EHI_133790	6.75845	1.8287	3.20685	8.74632	6.85544	4.68785	0.205719	0.837689	0.86976	1.82736	1879
EHI_077290	56.771	60.3471	48.1027	64.7228	113.604	124.697	0.000917773	0.0532169	0.86927	1.82674	132
EHI_171750	1.35169	1.8287	3.20685	2.6239	4.89674	4.68785	0.276474	0.886525	0.861144	1.81648	2387
EHI_027740	8.11014	4.57175	7.48264	16.618	13.7109	5.62541	0.114817	0.73146	0.861101	1.81642	1201
EHI_076840	248.711	151.782	255.479	386.587	390.76	406.905	6.78e-06	0.000997762	0.858963	1.81373	52
EHI_092310	2.70338	3.6574	1.06895	3.49853	7.83479	2.81271	0.344893	0.924627	0.85695	1.81121	2855
EHI_163860	27.0338	27.4305	21.379	41.9823	47.9881	47.816	0.00140342	0.0720224	0.856831	1.81106	148
EHI_126030	205.457	112.465	175.308	276.384	308.495	300.96	1.94e-05	0.00224655	0.855671	1.8096	66
EHI_092210	12.1652	6.40044	12.8274	19.2419	15.6696	20.6265	0.0402752	0.513777	0.854743	1.80844	600
EHI_122780	59.4744	25.6018	45.9648	62.0989	79.3272	90.0066	0.00435164	0.155728	0.84515	1.79645	213
EHI_188600	2.70338	5.4861	0	9.62095	1.9587	3.75028	0.320846	0.916697	0.84373	1.79468	2678
EHI_085720	9.46183	31.0879	20.31	37.6092	18.6076	55.3166	0.0600636	0.593196	0.839242	1.78911	775
EHI_152250	22.9787	27.4305	30.9995	48.9794	56.8022	40.3155	0.00254636	0.110738	0.828283	1.77557	176
EHI_014180	112.19	94.178	86.5848	188.046	160.613	167.825	4.38e-06	0.000728461	0.827019	1.77402	46
EHI_124340	17.572	13.7152	19.2411	19.2419	47.0087	23.4392	0.0420398	0.520908	0.824835	1.77133	615
EHI_112490	8.11014	10.9722	6.41369	20.9912	3.91739	20.6265	0.17174	0.799432	0.823338	1.7695	1643
EHI_153550	4.05507	6.40044	7.48264	8.74632	14.6902	9.37569	0.091602	0.686172	0.817708	1.7626	1021
EHI_044550	1727.46	1192.31	1577.77	2707.86	2577.65	2631.76	4.36e-06	0.000728461	0.816894	1.76161	45
EHI_198670	93.2666	60.3471	91.9296	127.696	154.737	146.261	8.85e-05	0.00769624	0.816017	1.76054	88
EHI_151310	4.05507	10.9722	10.6895	20.1165	14.6902	12.1884	0.0589971	0.588472	0.811219	1.75469	766
EHI_093810	0	8.22914	3.20685	12.2449	5.87609	3.75028	0.257405	0.876793	0.80926	1.75231	2246
EHI_142890	35.1439	15.5439	19.2411	41.1077	36.2359	41.253	0.0165482	0.339712	0.806383	1.74882	372
EHI_164470	6.75845	8.22914	5.34474	12.2449	8.81414	15.0011	0.0843776	0.67147	0.805668	1.74796	961
EHI_048170	1098.92	798.227	1136.29	1806.99	1590.46	1900.45	8.93e-06	0.00124205	0.805608	1.74788	55
EHI_023290	6.75845	4.57175	5.34474	10.4956	9.79349	8.43812	0.149997	0.77889	0.804177	1.74615	1472
EHI_069140	37.8473	38.4027	45.9648	82.2154	82.2653	48.7536	0.0027927	0.11656	0.799932	1.74102	183
EHI_023860	8.11014	18.287	10.6895	25.3643	31.3392	9.37569	0.0919797	0.686172	0.792161	1.73167	1026
EHI_102160	2.70338	9.14349	1.06895	7.87169	6.85544	9.37569	0.17496	0.800016	0.792035	1.73152	1672
EHI_126250	990.789	634.558	831.642	1386.29	1371.09	1471.05	1.93e-05	0.00224655	0.785412	1.72358	65
EHI_067240	5.40676	9.14349	3.20685	8.74632	14.6902	8.43812	0.126211	0.751682	0.783861	1.72173	1285
EHI_013895	598.799	450.774	596.473	943.728	843.219	1041.64	9.92e-06	0.00135652	0.783101	1.72083	56
EHI_006540	27.0338	20.1157	12.8274	24.4897	41.1326	36.5652	0.0267428	0.437371	0.781379	1.71877	468
EHI_161190	43.2541	65.8331	30.9995	97.0842	66.5957	78.7558	0.00500442	0.167999	0.777573	1.71424	228
EHI_003790	1.35169	3.6574	4.27579	3.49853	9.79349	3.75028	0.23465	0.853522	0.775541	1.71183	2102
EHI_121620	37.8473	24.6874	33.1374	55.9765	65.6164	40.3155	0.00755348	0.221511	0.775399	1.71166	261
EHI_168310	5.40676	15.5439	10.6895	22.7404	20.5663	13.126	0.0626437	0.600968	0.772653	1.70841	796
EHI_032470	266.283	292.592	318.547	475.8	527.869	496.912	3.45e-07	7.34e-05	0.771286	1.70679	36
EHI_127050	2.70338	6.40044	3.20685	12.2449	6.85544	2.81271	0.275666	0.886525	0.770619	1.706	2379
EHI_039610	4320	5488.84	6660.62	9007.84	9779.77	9288.5	2.64e-05	0.00284436	0.769307	1.70445	71
EHI_134990	18.9237	32.0022	10.6895	32.3614	39.1739	35.6276	0.0326441	0.477739	0.767983	1.70289	523
EHI_023220	4329.46	3431.55	4022.45	6669.95	6000.47	7385.23	6.57e-06	0.000986431	0.767526	1.70235	51
EHI_155640	18.9237	14.6296	11.7584	27.9882	22.525	25.3144	0.0251845	0.417764	0.763588	1.69771	461
EHI_120950	17.572	25.6018	27.7927	43.7316	27.4218	50.6287	0.0179877	0.353545	0.760903	1.69455	387
EHI_170940	150.038	96.0067	133.619	229.154	219.374	189.389	6.9e-05	0.00655657	0.760752	1.69437	80
EHI_158210	2.70338	4.57175	3.20685	10.4956	5.87609	1.87514	0.353157	0.930821	0.758154	1.69133	2903
EHI_021580	0	2.74305	4.27579	6.12243	2.93805	3.75028	0.316543	0.91415	0.756823	1.68977	2650
EHI_149880	0	3.6574	0	5.24779	0	1.87514	0.613028	0.994383	0.756703	1.68962	4706
EHI_042730	27.0338	22.8587	20.31	43.7316	39.1739	34.6901	0.00859336	0.240929	0.756012	1.68882	273
EHI_038990	16.2203	16.4583	27.7927	23.6151	36.2359	43.1282	0.0302417	0.463302	0.755845	1.68862	498
EHI_153710	32.4406	25.6018	54.5164	45.4809	76.3892	68.4425	0.0165551	0.339712	0.755418	1.68812	373
EHI_018840	0	2.74305	3.20685	7.87169	1.9587	0.937569	0.422554	0.950097	0.751632	1.6837	3404
EHI_024540	8.11014	0.914349	4.27579	5.24779	1.9587	14.0635	0.411382	0.947145	0.750989	1.68295	3320
EHI_054730	4.05507	9.14349	7.48264	8.74632	9.79349	17.8138	0.132695	0.765371	0.750468	1.68234	1327
EHI_045040	1.35169	1.8287	3.20685	4.37316	3.91739	2.81271	0.369286	0.932432	0.74492	1.67588	3031
EHI_116050	2.70338	7.31479	9.62054	11.3702	14.6902	8.43812	0.14157	0.76995	0.744899	1.67586	1405
EHI_128180	31.0889	35.6596	34.2063	60.3496	71.4924	38.4403	0.00925185	0.249344	0.744536	1.67544	284
EHI_127700	20.2754	8.22914	23.5169	33.236	24.4837	27.1895	0.0574457	0.581737	0.739285	1.66935	755
EHI_165670	16.2203	5.4861	10.6895	19.2419	19.587	13.126	0.110013	0.722745	0.739251	1.66931	1165
EHI_006770	29.7372	14.6296	21.379	34.1107	37.2152	35.6276	0.0233124	0.402598	0.739136	1.66918	443
EHI_058820	21.627	3.6574	9.62054	22.7404	18.6076	14.0635	0.178161	0.805332	0.737603	1.6674	1690
EHI_082580	59.4744	64.9188	45.9648	113.702	78.3479	91.8818	0.00145654	0.0733442	0.736387	1.666	152
EHI_055830	0	0	4.27579	1.74926	4.89674	0.937569	0.599039	0.991147	0.735737	1.66525	4626
EHI_186810	152.741	128.923	137.894	183.673	277.156	236.267	8.05e-05	0.00716854	0.734884	1.66426	86
EHI_026490	2.70338	1.8287	2.1379	4.37316	0.979349	5.62541	0.524973	0.980653	0.734796	1.66416	4095
EHI_159600	1958.6	1756.46	1957.24	3075.21	3194.63	3167.11	2.88e-06	0.000523938	0.734632	1.66397	42
EHI_025480	1.35169	0	5.34474	2.6239	1.9587	6.56298	0.549394	0.982629	0.732241	1.66122	4272
EHI_154190	6.75845	8.22914	10.6895	16.618	1.9587	24.3768	0.274806	0.886525	0.731486	1.66035	2370
EHI_061750	8.11014	5.4861	9.62054	7.87169	11.7522	18.7514	0.152546	0.780552	0.729403	1.65795	1494
EHI_103260	233.842	145.382	205.238	339.357	325.144	297.209	7.38e-05	0.00672086	0.727817	1.65613	84
EHI_083120	47.3092	42.0601	79.1022	94.4603	110.666	74.068	0.00644671	0.198964	0.726733	1.65489	248
EHI_010090	33.7923	28.3448	26.7237	48.1048	53.8642	44.0657	0.00515016	0.171388	0.725344	1.65329	230
EHI_159910	1.35169	0.914349	2.1379	2.6239	1.9587	2.81271	0.572357	0.985638	0.725302	1.65325	4444
EHI_030800	20516	16477.5	21567.1	31862	30444	34389.1	2.23e-05	0.00254743	0.723557	1.65125	67
EHI_027800	466.333	442.545	457.51	703.204	734.511	817.56	4.78e-06	0.000778867	0.723299	1.65095	47
EHI_120570	4.05507	0.914349	1.06895	3.49853	2.93805	2.81271	0.63565	0.99492	0.721287	1.64865	4867
EHI_086500	2.70338	7.31479	2.1379	7.87169	8.81414	4.68785	0.228528	0.851873	0.719497	1.64661	2053
EHI_019860	68.9362	54.861	64.1369	106.705	100.873	99.3823	0.00037136	0.0263184	0.718489	1.64546	108
EHI_152020	13.5169	22.8587	5.34474	31.4868	17.6283	20.6265	0.126994	0.752378	0.717963	1.64486	1291
EHI_154710	2.70338	0	6.41369	4.37316	0.979349	9.37569	0.449632	0.95928	0.716528	1.64322	3585
EHI_096720	8.11014	11.8865	13.8963	13.1195	20.5663	23.4392	0.0666049	0.615693	0.716125	1.64276	828
EHI_145480	0	0	5.34474	6.12243	0.979349	1.87514	0.520233	0.977769	0.715869	1.64247	4070
EHI_123390	1959.95	1986.88	2220.21	3295.61	3521.74	3311.49	5.83e-06	0.000905536	0.715656	1.64223	49
EHI_128210	0	1.8287	0	0	2.93805	0.937569	0.70677	1	0.713852	1.64018	5399
EHI_188130	104.08	115.208	110.102	167.929	187.056	186.576	1.43e-05	0.00182743	0.711435	1.63743	60
EHI_119750	0	0	3.20685	1.74926	0.979349	2.81271	0.541189	0.982629	0.71133	1.63731	4206
EHI_157780	1.35169	0	2.1379	0.874632	4.89674	0	0.553066	0.982629	0.710288	1.63613	4308
EHI_193330	5406.76	5702.8	6941.75	9541.36	10403.6	9584.77	1.9e-05	0.00224655	0.70996	1.63576	63
EHI_083640	31.0889	38.4027	41.689	67.3467	62.6783	53.4414	0.00309681	0.125224	0.70966	1.63542	189
EHI_143940	28.3855	73.1479	72.6885	119.825	90.1001	78.7558	0.0156896	0.331264	0.707413	1.63287	362
EHI_135760	168.961	172.812	177.445	276.384	268.341	303.772	3.29e-06	0.000571931	0.707317	1.63276	44
EHI_003030	1.35169	0	2.1379	1.74926	1.9587	1.87514	0.532986	0.982296	0.705426	1.63063	4153
EHI_179380	198.698	141.724	220.203	291.253	301.639	316.898	7.93e-05	0.00714112	0.704066	1.62909	85
EHI_144280	171.665	151.782	205.238	244.022	322.206	294.397	6.82e-05	0.00655657	0.703207	1.62812	79
EHI_052820	0	1.8287	0	1.74926	1.9587	0	0.70496	1	0.70224	1.62703	5389
EHI_115270	0	1.8287	0	0.874632	0.979349	1.87514	0.703164	1	0.701839	1.62658	5374
EHI_141030	74.343	100.578	67.3437	125.072	142.985	129.385	0.000425045	0.0291901	0.700858	1.62547	111
EHI_164420	8.11014	19.2013	27.7927	28.8629	29.3805	33.7525	0.0490678	0.545879	0.700181	1.62471	688
EHI_019390	9.46183	12.8009	9.62054	20.1165	12.7315	19.689	0.0854135	0.671887	0.699874	1.62436	970
EHI_021520	2.70338	0.914349	0	2.6239	0.979349	1.87514	0.742032	1	0.698445	1.62276	5635
EHI_095470	0	0.914349	1.06895	0	0.979349	2.81271	0.704403	1	0.697848	1.62208	5381
EHI_080850	16.2203	5.4861	12.8274	12.2449	22.525	19.689	0.138611	0.76995	0.697247	1.62141	1370
EHI_185610	18.9237	8.22914	8.55159	17.4926	15.6696	22.5017	0.123055	0.747759	0.695673	1.61964	1259
EHI_049880	31.0889	36.574	38.4821	62.0989	47.0087	63.7547	0.00518029	0.171645	0.694997	1.61888	231
EHI_148660	4.05507	5.4861	3.20685	10.4956	0.979349	9.37569	0.35037	0.92922	0.693691	1.61742	2886
EHI_114160	14.8686	5.4861	26.7237	34.9853	19.587	20.6265	0.17371	0.800016	0.69183	1.61533	1657
EHI_054650	4.05507	5.4861	1.06895	5.24779	3.91739	8.43812	0.331709	0.918226	0.690712	1.61408	2758
EHI_187100	47.3092	35.6596	39.5511	71.7198	58.7609	64.6923	0.00420572	0.154022	0.688658	1.61178	209
EHI_159540	28.3855	31.0879	12.8274	26.239	38.1946	52.5039	0.0689456	0.617649	0.687599	1.6106	853
EHI_138960	16.2203	19.2013	6.41369	21.8658	24.4837	21.5641	0.0847791	0.671887	0.685638	1.60841	964
EHI_192440	1.35169	0.914349	0	0.874632	1.9587	0.937569	0.701604	1	0.68555	1.60832	5360
EHI_167340	8.11014	6.40044	7.48264	15.7434	10.7728	8.43812	0.176812	0.803591	0.684617	1.60728	1683
EHI_062810	1.35169	0.914349	1.06895	5.24779	0	0	0.757027	1	0.684558	1.60721	5742
EHI_147990	1.35169	0.914349	0	0.874632	0.979349	1.87514	0.701552	1	0.683834	1.6064	5359
EHI_194070	4.05507	1.8287	5.34474	2.6239	7.83479	7.50055	0.335375	0.920024	0.681954	1.60431	2789
EHI_021450	801.552	586.098	841.262	1145.77	1150.73	1275.09	0.000135265	0.0112535	0.68167	1.604	92
EHI_007890	10.8135	15.5439	3.20685	15.7434	15.6696	16.8762	0.146924	0.776116	0.679328	1.60139	1447
EHI_118210	62.1778	42.9744	23.5169	68.2213	67.575	67.505	0.0215389	0.38858	0.678773	1.60078	423
EHI_108490	8.11014	8.22914	9.62054	12.2449	15.6696	14.0635	0.112532	0.730271	0.678647	1.60064	1178
EHI_030070	533.918	488.263	621.059	818.656	822.653	985.385	7.02e-05	0.00655657	0.676958	1.59877	82
EHI_189960	241.953	164.583	249.065	292.127	444.624	308.46	0.00106218	0.0597789	0.676412	1.59816	136
EHI_002160	6.75845	3.6574	1.06895	2.6239	5.87609	9.37569	0.355078	0.930856	0.674549	1.5961	2917
EHI_021780	21.627	21.9444	24.5858	44.6062	26.4424	37.5028	0.030987	0.468385	0.673	1.59439	506
EHI_167740	21.627	26.5161	17.1032	36.7346	32.3185	35.6276	0.0217223	0.389162	0.668709	1.58965	427
EHI_111830	64.8811	38.4027	38.4821	62.9735	73.4511	85.3188	0.0116403	0.278227	0.667792	1.58864	320
EHI_189090	0	0	2.1379	3.49853	0	0	0.714864	1	0.667203	1.58799	5456
EHI_041680	0	4.57175	2.1379	6.99706	2.93805	1.87514	0.429614	0.953381	0.666867	1.58762	3447
EHI_166460	6.75845	2.74305	2.1379	6.99706	3.91739	6.56298	0.40249	0.944743	0.665494	1.58611	3257
EHI_132000	2.70338	4.57175	5.34474	6.12243	13.7109	0.937569	0.384589	0.938375	0.66443	1.58494	3132
EHI_054190	5.40676	26.5161	10.6895	27.9882	13.7109	28.1271	0.185017	0.812377	0.660878	1.58104	1743
EHI_002460	2.70338	0	0	0.874632	0	2.81271	0.70805	1	0.656202	1.57593	5406
EHI_115360	323.054	289.849	307.857	507.287	454.418	483.786	1.21e-05	0.00161919	0.653008	1.57244	57
EHI_138440	89.2116	87.7775	92.9985	168.804	128.295	126.572	0.000668217	0.0415456	0.652057	1.57141	123
EHI_137060	18.9237	13.7152	6.41369	22.7404	19.587	17.8138	0.123491	0.748379	0.650732	1.56996	1263
EHI_095140	1.35169	2.74305	4.27579	9.62095	0.979349	2.81271	0.389335	0.938375	0.650598	1.56982	3174
EHI_201410	2.70338	5.4861	6.41369	0.874632	13.7109	9.37569	0.374581	0.934499	0.6498	1.56895	3068
EHI_198000	60.8261	46.6318	33.1374	61.2243	90.1001	67.505	0.0157106	0.331264	0.648589	1.56763	363
EHI_024490	240.601	787.255	287.547	1190.37	520.034	351.588	0.135465	0.76995	0.646632	1.56551	1342
EHI_199470	9.46183	11.8865	8.55159	13.9941	16.6489	16.8762	0.115873	0.73146	0.642207	1.56071	1211
EHI_138790	120.3	115.208	133.619	195.043	214.477	165.95	0.000232083	0.0172462	0.640401	1.55876	103
EHI_038860	6589.49	4769.25	6244.8	9092.68	8617.29	9720.72	0.000227008	0.0170345	0.640162	1.5585	102
EHI_169620	98.6734	62.1757	68.4127	90.0871	140.047	123.759	0.00751706	0.221291	0.639038	1.55729	260
EHI_045350	47.3092	26.5161	42.7579	62.9735	47.0087	68.4425	0.0247735	0.414915	0.637303	1.55542	457
EHI_073280	21.627	17.3726	24.5858	47.2301	25.4631	25.3144	0.0749565	0.640371	0.636579	1.55464	895
EHI_012090	12.1652	9.14349	4.27579	9.62095	17.6283	12.1884	0.193395	0.82348	0.636358	1.5544	1797
EHI_004070	0	5.4861	6.41369	1.74926	10.7728	7.50055	0.366654	0.931628	0.635824	1.55382	3010
EHI_086360	27.0338	20.1157	18.1721	34.9853	29.3805	35.6276	0.0377923	0.504821	0.63576	1.55376	573
EHI_146580	24.3304	28.3448	19.2411	39.3584	46.0294	27.1895	0.043177	0.524567	0.635585	1.55357	630
EHI_159460	68.9362	61.2614	24.5858	66.472	74.4305	98.4448	0.0453514	0.533163	0.634311	1.5522	649
EHI_068580	144.631	99.6641	143.239	216.909	170.407	210.015	0.000953438	0.0548693	0.634294	1.55218	133
EHI_138400	18.9237	7.31479	10.6895	23.6151	11.7522	19.689	0.173988	0.800016	0.633405	1.55122	1662
EHI_131470	166.258	96.0067	129.343	152.186	214.477	236.267	0.00492685	0.166124	0.632496	1.55024	227
EHI_191200	67.5845	114.294	110.102	178.425	149.84	128.447	0.00336027	0.131774	0.631191	1.54884	195
EHI_155340	147.334	131.666	144.308	218.658	214.477	220.329	5.07e-05	0.0050436	0.630154	1.54773	77
EHI_092320	56.771	72.2336	54.5164	90.0871	92.0588	104.07	0.00236995	0.105463	0.628814	1.54629	172
EHI_196770	0	0.914349	0	0	0.979349	0.937569	1	1	0.626529	1.54385	7353
EHI_110490	5.40676	0.914349	2.1379	3.49853	4.89674	3.75028	0.544737	0.982629	0.626336	1.54364	4231
EHI_157010	0	0.914349	0	0	0	1.87514	1	1	0.625905	1.54318	7396
EHI_155360	231.139	202.986	231.962	380.465	314.371	329.087	6.98e-05	0.00655657	0.623874	1.54101	81
EHI_106800	9.46183	21.03	21.379	31.4868	25.4631	25.3144	0.0591528	0.588759	0.623369	1.54047	769
EHI_177020	1.35169	8.22914	3.20685	6.12243	4.89674	10.3133	0.318591	0.915727	0.620472	1.53738	2660
EHI_021380	0	0.914349	0	0.874632	0	0.937569	1	1	0.620419	1.53732	7396
EHI_177410	0	0	1.06895	0	1.9587	0	1	1	0.6201	1.53698	7396
EHI_001860	31.0889	42.9744	39.5511	65.5974	52.8848	58.1293	0.00979505	0.25538	0.619711	1.53657	293
EHI_084260	1.35169	4.57175	8.55159	5.24779	7.83479	10.3133	0.342183	0.922371	0.618806	1.5356	2839
EHI_126910	0	0.914349	0	1.74926	0	0	1	1	0.616972	1.53365	7353
EHI_012030	0	0	1.06895	0	0.979349	0.937569	1	1	0.616961	1.53364	7335
EHI_182840	58.1227	61.2614	86.5848	113.702	99.8935	103.133	0.0033744	0.131774	0.61682	1.53349	196
EHI_051710	7200.45	8810.67	10160.4	13518.3	14048.8	12561.6	0.000411073	0.0286032	0.616498	1.53315	110
EHI_051010	492.015	783.597	612.507	1118.65	875.538	904.754	0.00162363	0.0791543	0.616012	1.53263	157
EHI_103140	0	0	1.06895	0	0	1.87514	1	1	0.614749	1.53129	7396
EHI_099280	63.5294	83.2058	65.2059	90.0871	119.481	118.134	0.00310851	0.125224	0.61474	1.53128	190
EHI_161660	0	0	1.06895	0.874632	0.979349	0	1	1	0.61309	1.52953	7396
EHI_103480	9.46183	5.4861	3.20685	6.12243	7.83479	13.126	0.325876	0.918226	0.612781	1.5292	2709
EHI_165810	4.05507	4.57175	7.48264	9.62095	4.89674	10.3133	0.280444	0.887142	0.611034	1.52735	2419
EHI_196900	66.2328	85.9488	42.7579	102.332	110.666	86.2564	0.0133339	0.301055	0.609555	1.52579	339
EHI_098070	24.3304	17.3726	59.8611	55.9765	34.2772	64.6923	0.143143	0.770476	0.609532	1.52576	1422
EHI_118610	47.3092	63.0901	48.1027	76.9676	98.9142	68.4425	0.00870537	0.243179	0.608674	1.52486	274
EHI_163620	28.3855	25.6018	25.6548	33.236	44.0707	44.0657	0.0293205	0.458935	0.608234	1.52439	489
EHI_096310	29.7372	27.4305	30.9995	62.9735	31.3392	39.3779	0.0620873	0.600968	0.60804	1.52419	788
EHI_164480	114.894	111.551	115.446	161.807	185.097	174.388	0.000218897	0.0165885	0.607991	1.52414	101
EHI_131250	22.9787	16.4583	5.34474	18.3673	27.4218	21.5641	0.169011	0.798913	0.6079	1.52404	1619
EHI_100700	0	0	1.06895	1.74926	0	0	1	1	0.6059	1.52193	7396
EHI_110980	31.0889	50.2892	61.999	85.714	66.5957	68.4425	0.018153	0.353545	0.604918	1.52089	393
EHI_094250	1.35169	0	0	0	0.979349	0.937569	1	1	0.604719	1.52068	7396
EHI_169910	47.3092	36.574	41.689	47.2301	75.4098	67.505	0.0226775	0.396286	0.604701	1.52066	438
EHI_149010	37.8473	41.1457	30.9995	65.5974	56.8022	45.0033	0.0213943	0.38858	0.60334	1.51923	421
EHI_181150	51.3642	59.4327	57.7232	76.093	103.811	77.8182	0.0059736	0.190101	0.601969	1.51779	238
EHI_048300	1.35169	0	0	0.874632	0.979349	0	1	1	0.600809	1.51657	7320
EHI_021480	1.35169	0	0	0	0	1.87514	1	1	0.600583	1.51633	7353
EHI_013930	39.199	54.861	52.3785	69.9706	66.5957	88.1315	0.00880193	0.243934	0.60056	1.5163	276
EHI_151550	87.8599	37.4883	78.0332	102.332	118.501	83.4437	0.0355341	0.498827	0.598419	1.51406	544
EHI_123950	1.35169	0	0	0.874632	0	0.937569	1	1	0.598407	1.51404	7396
EHI_174260	8.11014	9.14349	14.9653	17.4926	21.5457	10.3133	0.169406	0.798913	0.597189	1.51277	1623
EHI_126560	20.2754	12.8009	26.7237	30.6121	6.85544	52.5039	0.306031	0.903946	0.59522	1.5107	2591
EHI_147710	39.199	27.4305	64.1369	64.7228	59.7403	72.1928	0.0454674	0.533163	0.593658	1.50907	652
EHI_194830	1.35169	2.74305	1.06895	5.24779	1.9587	0.937569	0.615495	0.994383	0.593389	1.50879	4727
EHI_189520	21.627	32.0022	26.7237	42.857	37.2152	43.1282	0.0279264	0.445309	0.592711	1.50808	480
EHI_067070	6.75845	5.4861	6.41369	3.49853	10.7728	14.0635	0.355127	0.930856	0.59231	1.50766	2919
EHI_016450	25.6821	40.2314	24.5858	56.8511	37.2152	44.0657	0.0492717	0.546292	0.59142	1.50673	690
EHI_112990	2.70338	1.8287	5.34474	2.6239	6.85544	5.62541	0.479403	0.968413	0.590805	1.50609	3789
EHI_157260	5.40676	5.4861	0	7.87169	0	8.43812	0.604331	0.992797	0.588302	1.50348	4658
EHI_065250	827.234	1218.83	878.676	1438.77	1360.32	1598.56	0.00142088	0.0720224	0.586747	1.50186	151
EHI_159450	214.919	151.782	195.618	296.5	285.97	256.894	0.000659876	0.0413991	0.586123	1.50121	122
EHI_048600	4.05507	4.57175	1.06895	6.99706	2.93805	4.68785	0.478872	0.968309	0.58601	1.50109	3783
EHI_141010	135.169	250.532	209.514	327.112	317.309	255.019	0.00429137	0.155185	0.585699	1.50077	211
EHI_124390	4.05507	7.31479	5.34474	8.74632	10.7728	6.56298	0.284291	0.891986	0.58489	1.49992	2439
EHI_191730	10.8135	6.40044	16.0342	13.9941	16.6489	18.7514	0.186156	0.815125	0.583992	1.49899	1748
EHI_170580	4.05507	0.914349	2.1379	6.12243	0	3.75028	0.678739	0.996951	0.582712	1.49766	5209
EHI_113930	22.9787	7.31479	8.55159	20.1165	21.5457	14.0635	0.253501	0.872076	0.582588	1.49753	2224
EHI_065660	62.1778	52.1179	47.0337	86.5886	70.5131	82.5061	0.00837497	0.238298	0.58233	1.49727	269
EHI_034820	1.35169	8.22914	5.34474	2.6239	15.6696	5.62541	0.37851	0.937274	0.581916	1.49684	3091
EHI_126870	16817.7	13620.1	17495.5	24596.4	23132.2	23999.9	0.00046322	0.0308303	0.581574	1.49648	115
EHI_142690	0	3.6574	0	2.6239	0	3.75028	0.78129	1	0.577706	1.49247	5917
EHI_076000	41.9024	43.8888	48.1027	69.0959	54.8435	75.9431	0.0127644	0.296057	0.575718	1.49042	330
EHI_030100	16.2203	25.6018	26.7237	24.4897	47.0087	32.8149	0.0940577	0.691037	0.575511	1.4902	1041
EHI_124560	293.317	231.33	269.375	411.952	385.863	380.653	0.000252029	0.0185484	0.574687	1.48935	104
EHI_137780	6.75845	3.6574	0	5.24779	4.89674	4.68785	0.486848	0.968413	0.573549	1.48818	3847
EHI_022840	16.2203	16.4583	17.1032	25.3643	26.4424	22.5017	0.0813715	0.664474	0.57262	1.48722	936
EHI_137080	2.70338	4.57175	0	0.874632	7.83479	2.81271	0.564789	0.985128	0.570936	1.48549	4384
EHI_023880	263.58	288.934	246.927	406.704	386.843	394.717	0.000145597	0.0118553	0.570021	1.48455	94
EHI_040390	16.2203	32.0022	33.1374	39.3584	40.1533	44.0657	0.0498611	0.546758	0.568076	1.48254	698
EHI_118020	4.05507	10.0578	4.27579	13.1195	6.85544	8.43812	0.335751	0.920024	0.567583	1.48204	2791
EHI_068690	44.6058	28.3448	34.2063	50.7287	53.8642	51.5663	0.0312627	0.468385	0.566905	1.48134	510
EHI_064560	16.2203	14.6296	13.8963	18.3673	25.4631	22.5017	0.113361	0.730271	0.566573	1.481	1183
EHI_050490	48.6609	38.4027	40.62	67.3467	62.6783	57.1917	0.0170727	0.344787	0.565943	1.48035	379
EHI_074540	2.70338	3.6574	6.41369	11.3702	5.87609	1.87514	0.481162	0.968413	0.564519	1.47889	3802
EHI_194480	66.2328	61.2614	43.8269	72.5945	90.1001	90.0066	0.0131372	0.300155	0.563651	1.478	335
EHI_051800	58.1227	60.3471	38.4821	76.9676	67.575	87.1939	0.0180624	0.353545	0.56244	1.47676	390
EHI_182590	3360.3	2057.29	3022.99	4146.63	3922.29	4382.2	0.00392506	0.145856	0.56146	1.47576	205
EHI_091520	36.4956	28.3448	27.7927	26.239	51.9055	58.1293	0.0978376	0.695178	0.561338	1.47564	1076
EHI_159190	9.46183	2.74305	0	3.49853	4.89674	8.43812	0.571283	0.985128	0.559943	1.47421	4437
EHI_079300	700.176	1387.98	690.541	1555.1	1245.73	1298.53	0.0217614	0.389162	0.55926	1.47351	428
EHI_178130	17.572	21.9444	9.62054	31.4868	16.6489	24.3768	0.164327	0.791277	0.555141	1.46931	1586
EHI_175460	129.762	175.555	184.928	200.291	273.238	251.269	0.00278401	0.11656	0.55482	1.46899	182
EHI_165080	44.6058	55.7753	43.8269	60.3496	83.2446	70.3177	0.017005	0.344329	0.553903	1.46805	378
EHI_201260	71.6396	47.5462	71.6195	79.5915	95.9762	102.195	0.0167943	0.342784	0.553615	1.46776	375
EHI_081240	24.3304	8.22914	17.1032	26.239	25.4631	18.7514	0.199442	0.831445	0.553612	1.46776	1836
EHI_025340	21.627	24.6874	23.5169	34.9853	41.1326	27.1895	0.0623954	0.600968	0.552628	1.46675	793
EHI_177050	37.8473	79.5484	34.2063	99.7081	57.7816	67.505	0.087168	0.671887	0.552459	1.46658	993
EHI_164390	6.75845	6.40044	6.41369	8.74632	8.81414	11.2508	0.31231	0.910491	0.552432	1.46656	2625
EHI_015240	4.05507	0.914349	4.27579	4.37316	4.89674	3.75028	0.56275	0.985128	0.55193	1.46605	4369
EHI_129940	158.148	152.696	188.135	272.011	236.023	223.141	0.000896359	0.0527748	0.551884	1.466	130
EHI_135040	72.9913	83.2058	56.6543	111.078	85.2033	116.259	0.0123439	0.288048	0.551257	1.46536	328
EHI_192070	6.75845	6.40044	6.41369	9.62095	6.85544	12.1884	0.319592	0.915822	0.550297	1.46439	2671
EHI_104370	114.894	120.694	114.377	183.673	149.84	179.076	0.00117278	0.0623331	0.549808	1.46389	144
EHI_188860	5.40676	6.40044	3.20685	6.12243	8.81414	7.50055	0.379832	0.93769	0.549479	1.46356	3098
EHI_155380	39.199	46.6318	22.4479	62.9735	47.0087	48.7536	0.0625032	0.600968	0.547741	1.46179	794
EHI_079940	39.199	29.2592	19.2411	39.3584	46.0294	41.253	0.071978	0.632514	0.547365	1.46141	871
EHI_047780	63.5294	49.3749	71.6195	79.5915	100.873	88.1315	0.0138788	0.309703	0.547248	1.4613	343
EHI_104690	10.8135	19.2013	20.31	20.9912	25.4631	29.0646	0.110595	0.72412	0.546113	1.46015	1169
EHI_092120	4705.23	3490.07	4829.51	6587.73	6089.59	6327.65	0.00181807	0.0869721	0.545389	1.45941	160
EHI_170620	16.2203	13.7152	22.4479	26.239	35.2565	15.0011	0.168906	0.798913	0.544566	1.45858	1616
EHI_096480	68.9362	108.808	71.6195	123.323	137.109	106.883	0.0115566	0.278073	0.542361	1.45635	318
EHI_146920	70.2879	98.7497	91.9296	118.95	124.377	140.635	0.0042983	0.155185	0.542359	1.45635	212
EHI_098860	21.627	10.0578	21.379	33.236	21.5457	20.6265	0.173938	0.800016	0.541709	1.4557	1660
EHI_015290	2.70338	1.8287	7.48264	5.24779	1.9587	10.3133	0.556956	0.984424	0.540797	1.45478	4328
EHI_060370	48.6609	33.8309	47.0337	66.472	55.8229	63.7547	0.0268856	0.438769	0.540155	1.45413	469
EHI_197320	52.7159	98.7497	84.4469	134.693	105.77	106.883	0.016881	0.343635	0.540097	1.45407	376
EHI_114400	1.35169	0	3.20685	1.74926	4.89674	0	0.801402	1	0.539562	1.45353	6054
EHI_175260	27.0338	24.6874	33.1374	50.7287	49.9468	22.5017	0.122967	0.747759	0.538402	1.45236	1258
EHI_031520	63.5294	59.4327	82.309	104.081	93.0381	100.32	0.00980946	0.25538	0.536094	1.45004	294
EHI_151450	2.70338	4.57175	4.27579	13.9941	2.93805	0	0.629601	0.99492	0.535619	1.44956	4829
EHI_042950	27.0338	19.2013	11.7584	28.8629	26.4424	27.1895	0.125807	0.751682	0.534896	1.44884	1279
EHI_092700	1.35169	0.914349	5.34474	1.74926	3.91739	5.62541	0.687373	0.999839	0.53477	1.44871	5262
EHI_171310	20.2754	24.6874	20.31	33.236	29.3805	32.8149	0.0623421	0.600968	0.53453	1.44847	791
EHI_039020	3381.93	2610.47	3284.88	4370.54	4132.85	4921.3	0.00198198	0.0924108	0.533475	1.44741	164
EHI_010390	16.2203	11.8865	10.6895	21.8658	10.7728	22.5017	0.205043	0.836604	0.532791	1.44673	1875
EHI_006180	70.2879	82.2914	61.999	118.075	91.0794	102.195	0.0103751	0.265588	0.532643	1.44658	299
EHI_009690	13.5169	26.5161	23.5169	40.2331	24.4837	29.0646	0.119908	0.738526	0.532425	1.44636	1241
EHI_156290	63.5294	33.8309	45.9648	75.2184	48.9674	79.6934	0.0680774	0.616563	0.532405	1.44634	842
EHI_166830	6.75845	1.8287	4.27579	6.99706	5.87609	4.68785	0.509052	0.974958	0.53169	1.44562	3977
EHI_028980	39.199	21.03	24.5858	41.1077	47.0087	31.8773	0.109199	0.72144	0.530429	1.44436	1157
EHI_126210	255.469	174.641	185.997	308.745	272.259	302.835	0.00276184	0.11656	0.530128	1.44406	180
EHI_154250	72.9913	56.6897	52.3785	76.9676	91.0794	92.8193	0.0150142	0.3219	0.530015	1.44394	357
EHI_133780	8.11014	1.8287	10.6895	9.62095	9.79349	9.37569	0.352822	0.930821	0.528898	1.44283	2901
EHI_084720	1.35169	0	3.20685	2.6239	0	3.75028	1	1	0.528004	1.44193	7316
EHI_105310	48.6609	47.5462	11.7584	54.2272	63.6577	37.5028	0.202398	0.83472	0.527869	1.4418	1854
EHI_168320	35.1439	26.5161	32.0685	45.4809	56.8022	31.8773	0.0828652	0.667632	0.526768	1.4407	950
EHI_021680	40.5507	36.574	27.7927	47.2301	45.05	58.1293	0.0474617	0.535563	0.526396	1.44033	678
EHI_128460	2.70338	2.74305	5.34474	5.24779	3.91739	6.56298	0.488263	0.969876	0.526365	1.4403	3853
EHI_069070	17.572	16.4583	19.2411	31.4868	17.6283	27.1895	0.135649	0.76995	0.525856	1.43979	1345
EHI_078540	12.1652	12.8009	23.5169	27.1136	17.6283	25.3144	0.151648	0.77889	0.525816	1.43975	1489
EHI_042240	36.4956	39.317	39.5511	44.6062	57.7816	64.6923	0.0341441	0.487572	0.525464	1.4394	536
EHI_110240	45.9575	28.3448	23.5169	50.7287	44.0707	43.1282	0.0792548	0.654386	0.52474	1.43867	927
EHI_142070	22.9787	35.6596	29.9306	55.9765	39.1739	33.7525	0.0860084	0.671887	0.523626	1.43756	978
EHI_159180	18.9237	29.2592	17.1032	31.4868	32.3185	31.8773	0.0916563	0.686172	0.522484	1.43643	1022
EHI_049030	448.761	511.121	390.166	750.434	616.01	571.917	0.0030453	0.123982	0.521075	1.43502	188
EHI_179700	17.572	25.6018	8.55159	27.1136	30.3598	17.8138	0.202249	0.83472	0.520994	1.43494	1850
EHI_169890	24.3304	24.6874	22.4479	25.3643	44.0707	33.7525	0.0961111	0.693826	0.520534	1.43449	1060
EHI_067600	16.2203	21.03	24.5858	32.3614	18.6076	38.4403	0.14475	0.772632	0.520131	1.43409	1433
EHI_148340	35.1439	35.6596	37.4132	63.8482	49.9468	41.253	0.0512821	0.552058	0.519811	1.43377	711
EHI_170450	41.9024	28.3448	25.6548	50.7287	48.9674	35.6276	0.0871552	0.671887	0.519197	1.43316	991
EHI_101430	117.597	162.754	140.032	233.527	167.469	204.39	0.00507434	0.169603	0.518602	1.43257	229
EHI_054760	36.4956	32.9166	38.4821	50.7287	49.9468	53.4414	0.0315493	0.468385	0.518325	1.43229	514
EHI_073470	625.833	768.053	846.607	1162.39	1203.62	844.75	0.00628485	0.196344	0.517799	1.43177	245
EHI_086560	33.7923	35.6596	34.2063	47.2301	59.7403	42.1906	0.0425588	0.520908	0.517788	1.43176	624
EHI_098460	1.35169	14.6296	7.48264	6.99706	16.6489	12.1884	0.380995	0.93769	0.516268	1.43025	3107
EHI_004520	8.11014	5.4861	1.06895	6.12243	12.7315	1.87514	0.467146	0.963497	0.515791	1.42978	3711
EHI_174060	5.40676	10.0578	6.41369	13.1195	6.85544	12.1884	0.303057	0.901321	0.515537	1.42953	2572
EHI_044510	55.4193	40.2314	55.5853	69.0959	67.575	76.8807	0.0270843	0.439785	0.511083	1.42512	471
EHI_187790	109.487	104.236	110.102	130.32	160.613	170.638	0.00452187	0.158763	0.510801	1.42484	218
EHI_059260	154.093	89.6062	150.722	207.288	196.849	153.761	0.019822	0.374354	0.510612	1.42465	405
EHI_040370	436.596	471.804	533.405	789.793	648.329	616.92	0.00281993	0.116669	0.510538	1.42458	185
EHI_004540	6.75845	27.4305	19.2411	28.8629	14.6902	34.6901	0.259899	0.879819	0.509563	1.42362	2261
EHI_108640	200.05	171.898	209.514	316.617	243.858	264.394	0.00241521	0.105685	0.508734	1.4228	174
EHI_035070	20.2754	29.2592	32.0685	37.6092	40.1533	40.3155	0.0653903	0.609142	0.508541	1.42261	820
EHI_049000	3576.57	3726.89	3855.7	5310.77	5295.34	5261.64	0.0010128	0.0574218	0.507772	1.42185	135
EHI_140980	52.7159	56.6897	50.2406	77.8423	79.3272	70.3177	0.0155582	0.329868	0.506379	1.42048	361
EHI_020490	95.97	49.3749	29.9306	62.9735	91.0794	91.8818	0.140151	0.76995	0.506366	1.42047	1392
EHI_006680	16.2203	8.22914	10.6895	13.9941	17.6283	16.8762	0.234908	0.853522	0.504715	1.41884	2105
EHI_187270	216.27	200.242	252.272	338.483	285.97	323.461	0.00160618	0.0788059	0.504676	1.4188	156
EHI_024570	24.3304	31.0879	20.31	37.6092	38.1946	32.8149	0.0798709	0.656333	0.504288	1.41842	931
EHI_197310	24.3304	42.9744	56.6543	67.3467	67.575	43.1282	0.097781	0.695178	0.503334	1.41749	1075
EHI_148260	128.411	120.694	126.136	215.16	158.654	156.574	0.00598684	0.190101	0.502952	1.41711	239
EHI_147520	50.0125	32.9166	36.3442	53.3526	59.7403	53.4414	0.0524487	0.555416	0.50283	1.41699	722
EHI_029930	5.40676	1.8287	1.06895	5.24779	5.87609	0	0.702558	1	0.502818	1.41698	5368
EHI_197140	12.1652	16.4583	9.62054	12.2449	19.587	23.4392	0.199412	0.831445	0.502482	1.41665	1835
EHI_158300	10.8135	12.8009	10.6895	16.618	10.7728	21.5641	0.2144	0.846409	0.502322	1.41649	1929
EHI_122310	1105.68	1530.62	1011.23	1704.66	1849.01	1616.37	0.00671006	0.205435	0.502121	1.41629	250
EHI_117470	112.19	90.5206	117.584	148.687	153.758	149.073	0.00485297	0.165824	0.501924	1.4161	224
EHI_183530	91.9149	131.666	94.0675	146.938	162.572	144.386	0.00798176	0.230841	0.501704	1.41588	264
EHI_169340	86.5082	157.268	130.412	175.801	188.035	170.638	0.0128364	0.296827	0.498502	1.41275	331
EHI_136990	124.356	144.467	117.584	168.804	189.994	189.389	0.002778	0.11656	0.498231	1.41248	181
EHI_017680	33.7923	44.8031	36.3442	60.3496	56.8022	46.8785	0.0425581	0.520908	0.497927	1.41218	623
EHI_125180	14.8686	11.8865	1.06895	14.8687	8.81414	15.0011	0.413124	0.94715	0.497593	1.41186	3337
EHI_170290	6.75845	10.9722	8.55159	10.4956	10.7728	16.8762	0.247143	0.867076	0.496633	1.41092	2181
EHI_015230	421.727	448.945	417.959	572.884	590.547	654.423	0.0014078	0.0720224	0.495394	1.40971	149
EHI_142180	77.0463	76.8053	49.1716	88.3379	76.3892	120.946	0.0463923	0.533163	0.494567	1.4089	666
EHI_126860	10.8135	15.5439	14.9653	10.4956	29.3805	19.689	0.23679	0.855809	0.494514	1.40885	2117
EHI_044970	133.817	619.929	363.442	548.394	435.81	593.481	0.16509	0.791277	0.493907	1.40825	1596
EHI_037550	8.11014	11.8865	6.41369	13.1195	12.7315	12.1884	0.286962	0.895261	0.493276	1.40764	2453
EHI_189160	29.7372	40.2314	20.31	41.1077	48.9674	38.4403	0.0998251	0.69969	0.492367	1.40675	1092
EHI_178640	197.347	189.27	224.479	306.121	284.011	269.082	0.00141467	0.0720224	0.492292	1.40668	150
EHI_049990	0	2.74305	0	2.6239	1.9587	0	0.748359	1	0.491964	1.40636	5681
EHI_125890	29.7372	29.2592	53.4474	51.6033	45.05	61.8796	0.0968941	0.693826	0.491738	1.40614	1068
EHI_197360	75.6947	42.9744	79.1022	91.8364	94.0175	89.0691	0.045031	0.533163	0.490788	1.40521	643
EHI_096730	5.40676	4.57175	6.41369	11.3702	2.93805	8.43812	0.422404	0.950097	0.490754	1.40518	3402
EHI_154160	5.40676	10.0578	4.27579	16.618	9.79349	1.87514	0.501128	0.974958	0.490595	1.40502	3926
EHI_126170	0	2.74305	0	4.37316	0	0	1	1	0.490401	1.40483	7315
EHI_192560	2.70338	0.914349	3.20685	0.874632	6.85544	1.87514	0.828723	1	0.490103	1.40455	6250
EHI_078180	45.9575	32.0022	58.7922	71.7198	41.1326	77.8182	0.112146	0.729853	0.489083	1.40355	1175
EHI_159850	47.3092	64.9188	70.5506	104.956	81.2859	72.1928	0.0337764	0.484129	0.48869	1.40317	534
EHI_141390	37.8473	35.6596	38.4821	53.3526	53.8642	49.6912	0.0377327	0.504821	0.48845	1.40294	571
EHI_118440	475.795	509.293	400.856	659.473	701.214	584.106	0.00354939	0.135835	0.488146	1.40264	200
EHI_095060	33.7923	37.4883	23.5169	48.1048	40.1533	45.0033	0.0732818	0.634703	0.488076	1.40257	882
EHI_079230	43.2541	66.7475	47.0337	83.0901	65.6164	74.068	0.0377694	0.504821	0.486919	1.40145	572
EHI_005970	2105.93	2093.86	2504.55	3196.78	3126.08	3072.41	0.00240175	0.105685	0.486754	1.40129	173
EHI_075980	87.8599	65.8331	51.3095	91.8364	94.9968	97.5072	0.0329126	0.478902	0.485949	1.40051	526
EHI_096190	55.4193	47.5462	44.8958	76.093	64.637	64.6923	0.0334758	0.481702	0.484893	1.39948	531
EHI_103380	1.35169	1.8287	3.20685	5.24779	0.979349	2.81271	0.639867	0.99492	0.484814	1.39941	4906
EHI_022600	4.05507	9.14349	3.20685	11.3702	1.9587	10.3133	0.486498	0.968413	0.484603	1.3992	3842
EHI_030050	16.2203	17.3726	19.2411	22.7404	23.5044	28.1271	0.139763	0.76995	0.4838	1.39842	1383
EHI_107920	29.7372	25.6018	12.8274	34.9853	30.3598	29.0646	0.147925	0.776116	0.483501	1.39813	1457
EHI_049850	9.46183	12.8009	3.20685	13.1195	12.7315	10.3133	0.360368	0.930992	0.482061	1.39674	2954
EHI_140730	72.9913	52.1179	58.7922	70.8452	71.4924	112.508	0.0571041	0.58122	0.481834	1.39652	751
EHI_151170	14.8686	6.40044	0	13.1195	9.79349	5.62541	0.594971	0.989416	0.481507	1.3962	4600
EHI_023840	2105.93	1458.39	1293.43	2408.74	2048.8	2313.92	0.0147108	0.317738	0.480279	1.39501	354
EHI_151860	32.4406	35.6596	25.6548	50.7287	30.3598	49.6912	0.105328	0.713926	0.479921	1.39467	1129
EHI_126110	6.75845	4.57175	13.8963	13.9941	6.85544	14.0635	0.375078	0.935128	0.479619	1.39438	3070
EHI_105230	1.35169	5.4861	1.06895	4.37316	2.93805	4.68785	0.548346	0.982629	0.479477	1.39424	4266
EHI_054810	31.0889	16.4583	7.48264	28.8629	34.2772	12.1884	0.360161	0.930992	0.478557	1.39335	2952
EHI_144040	2.70338	0.914349	3.20685	4.37316	3.91739	0.937569	0.821376	1	0.478408	1.39321	6193
EHI_012370	27.0338	25.6018	25.6548	29.7375	41.1326	38.4403	0.0997134	0.69969	0.478336	1.39314	1090
EHI_029030	210.864	137.152	231.962	299.999	257.569	246.581	0.015535	0.329868	0.478113	1.39292	360
EHI_173600	4.05507	4.57175	8.55159	5.24779	11.7522	7.50055	0.427085	0.952722	0.477631	1.39246	3430
EHI_011170	21.627	35.6596	20.31	42.857	29.3805	37.5028	0.131677	0.76109	0.477319	1.39215	1323
EHI_001970	21.627	24.6874	22.4479	37.6092	33.2978	25.3144	0.116677	0.732603	0.477262	1.3921	1219
EHI_062500	268.986	197.499	258.686	338.483	323.185	343.15	0.00351906	0.135351	0.47663	1.39149	199
EHI_025240	33.7923	53.0323	47.0337	63.8482	58.7609	66.5674	0.0408783	0.518876	0.476502	1.39137	603
EHI_103900	55.4193	48.4605	76.9643	111.953	68.5544	70.3177	0.073288	0.634703	0.476375	1.39124	883
EHI_000660	27.0338	60.3471	32.0685	63.8482	57.7816	47.816	0.116017	0.73146	0.476209	1.39108	1214
EHI_118170	91.9149	93.2636	148.584	167.929	151.799	145.323	0.0216273	0.38858	0.476166	1.39104	426
EHI_155510	93.2666	72.2336	52.3785	84.8393	98.9142	117.196	0.0496124	0.546292	0.47604	1.39092	695
EHI_022020	8.11014	4.57175	3.20685	3.49853	7.83479	10.3133	0.58124	0.987047	0.475819	1.39071	4506
EHI_136430	43.2541	20.1157	23.5169	42.857	42.112	32.8149	0.16033	0.791277	0.475725	1.39062	1548
EHI_195010	21.627	46.6318	37.4132	55.1018	52.8848	42.1906	0.0952839	0.692595	0.475371	1.39028	1053
EHI_188040	4.05507	8.22914	6.41369	6.12243	10.7728	10.3133	0.373879	0.934028	0.47461	1.38954	3062
EHI_081670	14.8686	10.0578	17.1032	15.7434	20.5663	21.5641	0.251577	0.871243	0.473983	1.38894	2208
EHI_019120	20.2754	24.6874	22.4479	34.1107	29.3805	30.9398	0.09592	0.693269	0.473642	1.38861	1059
EHI_044830	721.803	458.089	769.643	882.504	857.909	962.883	0.0178199	0.353545	0.473516	1.38849	385
EHI_185110	6.75845	20.1157	27.7927	15.7434	28.4011	33.7525	0.293946	0.897438	0.473358	1.38834	2506
EHI_143600	13.5169	38.4027	28.8616	36.7346	26.4424	51.5663	0.197101	0.827886	0.473251	1.38823	1821
EHI_172380	1.35169	0.914349	1.06895	0	2.93805	1.87514	0.742858	1	0.473152	1.38814	5644
EHI_202710	83.8048	34.7453	81.2401	55.1018	106.749	113.446	0.161041	0.791277	0.472632	1.38764	1553
EHI_093990	0	0.914349	2.1379	2.6239	1.9587	0	0.74475	1	0.472533	1.38754	5658
EHI_093940	41.9024	53.0323	34.2063	67.3467	56.8022	56.2541	0.0563511	0.577391	0.472437	1.38745	747
EHI_086200	135.169	142.638	144.308	214.285	189.994	181.888	0.00323374	0.128912	0.472228	1.38725	192
EHI_023230	18852	18868.5	24431.9	27968.1	30813.2	27435.1	0.00598748	0.190101	0.472135	1.38716	240
EHI_050430	45.9575	45.7175	47.0337	59.475	69.5337	63.7547	0.0334813	0.481702	0.471745	1.38679	532
EHI_065890	89.2116	183.784	97.2743	202.04	145.923	169.7	0.0572176	0.581598	0.471458	1.38651	753
EHI_059040	4.05507	0.914349	7.48264	0.874632	10.7728	5.62541	0.598574	0.99095	0.471418	1.38647	4622
EHI_047790	47.3092	42.9744	22.4479	47.2301	56.8022	51.5663	0.11197	0.729853	0.470532	1.38562	1174
EHI_154270	22.9787	16.4583	17.1032	25.3643	26.4424	25.3144	0.151728	0.77889	0.469349	1.38448	1491
EHI_151350	48.6609	34.7453	47.0337	47.2301	62.6783	69.3801	0.0699149	0.618823	0.469007	1.38416	864
EHI_140630	60.8261	53.9466	57.7232	75.2184	79.3272	83.4437	0.0241389	0.410576	0.469007	1.38416	450
EHI_124450	114.894	92.3493	138.963	158.308	171.386	148.136	0.0135407	0.303932	0.468882	1.38404	341
EHI_059880	8.11014	9.14349	29.9306	11.3702	29.3805	25.3144	0.396576	0.943547	0.468425	1.3836	3217
EHI_079240	72.9913	64.0044	82.309	90.0871	114.584	98.4448	0.0226683	0.396286	0.468231	1.38341	437
EHI_087620	32.4406	36.574	18.1721	36.7346	46.0294	38.4403	0.131427	0.76109	0.467807	1.38301	1321
EHI_021300	44.6058	64.9188	44.8958	79.5915	75.4098	60.942	0.0474461	0.535563	0.467388	1.3826	677
EHI_050120	144.631	207.557	228.755	284.255	253.651	269.082	0.00918583	0.249344	0.466318	1.38158	280
EHI_157890	60.8261	56.6897	37.4132	65.5974	77.3685	70.3177	0.0523579	0.555416	0.46479	1.38012	721
EHI_051830	197.347	158.182	136.825	188.046	248.755	240.018	0.0123298	0.288048	0.464329	1.37968	327
EHI_030180	0	0	3.20685	2.6239	1.9587	0	0.749236	1	0.463803	1.37917	5685
EHI_023160	12.1652	31.0879	18.1721	29.7375	34.2772	23.4392	0.1876	0.816077	0.463711	1.37908	1754
EHI_009400	62.1778	47.5462	90.8606	88.3379	83.2446	104.07	0.065157	0.609142	0.462689	1.37811	817
EHI_038910	4.05507	5.4861	9.62054	7.87169	8.81414	10.3133	0.371042	0.933257	0.462641	1.37806	3042
EHI_104460	4.05507	16.4583	3.20685	8.74632	12.7315	13.126	0.410978	0.947145	0.46255	1.37798	3316
EHI_193940	64.8811	43.8888	66.2748	78.7169	81.2859	78.7558	0.0426561	0.520908	0.461892	1.37735	626
EHI_038290	12.1652	13.7152	5.34474	20.9912	7.83479	14.0635	0.358168	0.930992	0.461483	1.37696	2941
EHI_194610	12.1652	13.7152	6.41369	11.3702	18.6076	15.0011	0.270359	0.884361	0.460467	1.37599	2333
EHI_000670	173.016	158.182	172.101	211.661	251.693	227.829	0.00379042	0.142215	0.458894	1.37449	204
EHI_150140	104.08	114.294	63.068	123.323	120.46	143.448	0.0366552	0.501895	0.458864	1.37446	559
EHI_156280	93.2666	50.2892	66.2748	107.58	90.1001	86.2564	0.0626797	0.600968	0.45879	1.37439	798
EHI_092340	2.70338	10.0578	16.0342	12.2449	18.6076	10.3133	0.346914	0.927468	0.458718	1.37432	2862
EHI_115290	8.11014	13.7152	13.8963	13.9941	22.525	14.0635	0.262253	0.881824	0.458606	1.37421	2274
EHI_077000	5.40676	1.8287	0	4.37316	0.979349	3.75028	0.82742	1	0.457705	1.37336	6241
EHI_193840	10.8135	6.40044	14.9653	12.2449	11.7522	19.689	0.366208	0.931628	0.45736	1.37303	3005
EHI_019140	31.0889	41.1457	45.9648	57.7257	52.8848	53.4414	0.0561512	0.57642	0.457262	1.37293	745
EHI_151240	131.114	101.493	87.6538	170.553	133.191	132.197	0.0253646	0.41931	0.456358	1.37207	463
EHI_008350	5.40676	0.914349	9.62054	4.37316	4.89674	12.1884	0.630166	0.99492	0.456011	1.37174	4831
EHI_154310	2.70338	0.914349	0	1.74926	0.979349	1.87514	0.742351	1	0.455369	1.37113	5639
EHI_026360	154.093	198.414	249.065	227.404	254.631	345.025	0.0269922	0.43957	0.453854	1.36969	470
EHI_099360	29.7372	28.3448	38.4821	50.7287	35.2565	45.9409	0.105923	0.713926	0.453229	1.3691	1134
EHI_105160	8.11014	10.0578	17.1032	22.7404	12.7315	13.126	0.317936	0.915727	0.453148	1.36902	2657
EHI_107050	1966.71	2173.41	2596.48	2977.25	3273.96	2960.84	0.00730419	0.217177	0.451131	1.36711	257
EHI_096220	18.9237	10.9722	11.7584	22.7404	19.587	13.126	0.300274	0.901321	0.4505	1.36651	2547
EHI_156350	66.2328	51.2036	60.9301	76.9676	87.162	77.8182	0.037469	0.504821	0.450075	1.36611	566
EHI_081390	93.2666	104.236	94.0675	131.195	145.923	122.822	0.0106017	0.266434	0.450015	1.36605	302
EHI_159560	33.7923	32.9166	35.2753	45.4809	47.9881	45.9409	0.0676125	0.616563	0.449999	1.36604	837
EHI_157790	72.9913	69.4905	73.7574	103.207	94.0175	97.5072	0.0193238	0.368838	0.449347	1.36542	401
EHI_086580	20.2754	19.2013	30.9995	37.6092	34.2772	24.3768	0.164905	0.791277	0.448996	1.36509	1593
EHI_015980	24.3304	27.4305	26.7237	26.239	52.8848	29.0646	0.184594	0.811536	0.448944	1.36504	1741
EHI_039490	77.0463	50.2892	58.7922	84.8393	100.873	65.6298	0.0714685	0.630207	0.448211	1.36435	868
EHI_013080	21.627	15.5439	12.8274	13.9941	25.4631	28.1271	0.252307	0.871243	0.447158	1.36335	2214
EHI_098240	35.1439	20.1157	25.6548	43.7316	30.3598	33.7525	0.180761	0.807657	0.447074	1.36327	1711
EHI_175220	0	8.22914	2.1379	5.24779	5.87609	4.68785	0.528692	0.980707	0.447034	1.36323	4126
EHI_127290	8.11014	16.4583	13.8963	13.1195	16.6489	24.3768	0.267653	0.88301	0.446488	1.36272	2320
EHI_117680	5.40676	1.8287	2.1379	4.37316	4.89674	2.81271	0.693025	1	0.446179	1.36243	5291
EHI_020310	1.35169	1.8287	9.62054	2.6239	8.81414	6.56298	0.585698	0.987974	0.446111	1.36236	4533
EHI_088500	1.35169	0.914349	1.06895	4.37316	0	0	1	1	0.446014	1.36227	7396
EHI_048720	143.279	167.326	189.204	237.025	219.374	226.892	0.00577355	0.188849	0.445917	1.36218	234
EHI_127440	1.35169	0.914349	6.41369	6.99706	2.93805	1.87514	0.716864	1	0.445614	1.36189	5472
EHI_033900	5.40676	4.57175	6.41369	7.87169	8.81414	5.62541	0.469057	0.964245	0.444558	1.3609	3719
EHI_045220	54.0676	89.6062	73.7574	118.075	92.0588	89.0691	0.0472321	0.535563	0.444539	1.36088	673
EHI_067540	64.8811	53.0323	50.2406	79.5915	64.637	82.5061	0.0521038	0.555416	0.443525	1.35992	716
EHI_129830	28.3855	14.6296	23.5169	26.239	32.3185	30.0022	0.184319	0.810791	0.443034	1.35946	1740
EHI_005940	59.4744	41.1457	48.1027	76.9676	55.8229	66.5674	0.0751133	0.640371	0.442671	1.35912	896
EHI_180430	218.974	209.386	224.479	272.011	331.02	284.083	0.00435404	0.155728	0.442126	1.3586	214
EHI_068570	417.672	402.314	375.201	527.403	519.055	574.73	0.00411357	0.152103	0.440517	1.35709	207
EHI_012940	248.711	189.27	159.273	266.763	250.713	287.834	0.0162966	0.339598	0.438712	1.35539	367
EHI_039050	25.6821	36.574	28.8616	33.236	53.8642	38.4403	0.136194	0.76995	0.438495	1.35519	1349
EHI_051460	36.4956	61.2614	36.3442	62.9735	55.8229	65.6298	0.0867261	0.671887	0.43753	1.35428	986
EHI_065230	71.6396	65.8331	47.0337	67.3467	91.0794	90.9442	0.0639765	0.605286	0.437035	1.35382	809
EHI_044700	10.8135	13.7152	25.6548	22.7404	25.4631	20.6265	0.247114	0.867076	0.436623	1.35343	2180
EHI_069370	425.782	413.286	423.304	581.63	616.99	509.1	0.00546339	0.179471	0.436104	1.35295	233
EHI_104920	2.70338	0	1.06895	0	0	4.68785	1	1	0.43486	1.35178	7309
EHI_152650	86.5082	106.979	97.2743	134.693	137.109	123.759	0.014737	0.317738	0.434518	1.35146	355
EHI_022240	90.5633	63.0901	94.0675	96.2095	113.604	122.822	0.0426717	0.520908	0.434378	1.35133	627
EHI_069120	70.2879	28.3448	39.5511	45.4809	66.5957	71.2553	0.196147	0.827211	0.432668	1.34973	1814
EHI_035960	112.19	128.009	96.2054	160.058	158.654	135.948	0.0169961	0.344329	0.430445	1.34765	377
EHI_104540	110.839	118.865	84.4469	146.938	135.15	141.573	0.0204081	0.380985	0.430393	1.3476	410
EHI_195000	9.46183	6.40044	8.55159	13.9941	9.79349	8.43812	0.422972	0.950097	0.429825	1.34707	3406
EHI_126530	37.8473	39.317	49.1716	56.8511	50.9261	62.8171	0.0773231	0.64928	0.429648	1.3469	911
EHI_110370	93.2666	95.0923	110.102	110.204	141.026	151.886	0.0236364	0.405635	0.42964	1.3469	446
EHI_181280	8.11014	7.31479	5.34474	9.62095	11.7522	6.56298	0.458154	0.961533	0.428813	1.34613	3640
EHI_137720	690.714	755.252	848.745	1079.3	1121.35	889.753	0.0118313	0.279496	0.428658	1.34598	324
EHI_001750	40.5507	40.2314	42.7579	50.7287	54.8435	60.942	0.0693602	0.617649	0.428261	1.34561	859
EHI_151720	58.1227	80.4627	56.6543	89.2125	76.3892	99.3823	0.05347	0.559863	0.428108	1.34547	731
EHI_025490	177.071	121.608	190.273	218.658	216.436	219.391	0.0204619	0.381059	0.428103	1.34546	411
EHI_170970	2.70338	2.74305	0	3.49853	1.9587	1.87514	0.790669	1	0.42755	1.34495	5992
EHI_022010	1508.49	1606.51	1673.97	2442.85	1931.28	2066.4	0.00962834	0.253964	0.42733	1.34474	290
EHI_153070	13329	10783.8	15076.4	18400.5	16920.2	17374.1	0.0130192	0.298738	0.42726	1.34468	333
EHI_022870	178.423	149.039	111.171	233.527	198.808	154.699	0.042567	0.520908	0.426839	1.34428	625
EHI_092110	1121.9	815.6	1110.64	1342.56	1183.05	1567.62	0.0205914	0.382541	0.426496	1.34397	412
EHI_056120	62.1778	50.2892	71.6195	80.4662	80.3066	85.3188	0.0522564	0.555416	0.425598	1.34313	720
EHI_014350	40.5507	29.2592	34.2063	53.3526	46.0294	38.4403	0.125398	0.751675	0.424904	1.34248	1276
EHI_173750	4.05507	0	0	0.874632	3.91739	0	1	1	0.424719	1.34231	7396
EHI_011960	24.3304	30.1735	23.5169	31.4868	48.9674	25.3144	0.198161	0.828687	0.42286	1.34058	1830
EHI_159160	33008.3	25900.8	28505.6	35161.1	39986.8	41953.4	0.013283	0.301055	0.421847	1.33964	337
EHI_081370	1081.35	922.578	1050.78	1480.75	1351.5	1257.28	0.00915023	0.249344	0.421768	1.33957	279
EHI_095110	32.4406	35.6596	21.379	34.1107	46.0294	40.3155	0.154051	0.781405	0.420899	1.33876	1508
EHI_159660	82.4531	50.2892	53.4474	78.7169	86.1827	80.6309	0.0843943	0.67147	0.42016	1.33808	962
EHI_062540	275.745	168.24	97.2743	198.542	242.878	279.396	0.137399	0.76995	0.420055	1.33798	1356
EHI_042920	16241.9	12012.7	17052.9	19310.1	19931.7	21354.1	0.0176587	0.352867	0.419538	1.3375	382
EHI_045460	90.5633	80.4627	103.688	116.326	141.026	109.696	0.0323289	0.474033	0.419222	1.33721	522
EHI_175100	29.7372	32.0022	23.5169	32.3614	33.2978	48.7536	0.157307	0.787443	0.419202	1.33719	1527
EHI_017780	1.35169	3.6574	2.1379	6.12243	2.93805	0.937569	0.666642	0.99492	0.418078	1.33615	5123
EHI_093800	82.4531	48.4605	55.5853	92.711	78.3479	74.068	0.0943509	0.691064	0.417424	1.33554	1045
EHI_118710	201.402	167.326	235.169	270.261	262.465	271.895	0.0117992	0.279496	0.417147	1.33528	323
EHI_130490	13.5169	1.8287	5.34474	4.37316	6.85544	15.0011	0.624065	0.99492	0.415544	1.3338	4790
EHI_068610	13.5169	8.22914	7.48264	13.1195	9.79349	15.0011	0.412443	0.947145	0.415498	1.33376	3331
EHI_118270	11200.1	10352.3	11422.8	15447.8	13588.5	14937.4	0.00799228	0.230841	0.415301	1.33358	265
EHI_008650	10.8135	8.22914	6.41369	9.62095	12.7315	11.2508	0.42581	0.951576	0.414998	1.3333	3425
EHI_086540	98.6734	90.5206	81.2401	131.195	106.749	120.946	0.027849	0.445309	0.414414	1.33276	478
EHI_096710	94.6183	110.636	127.205	138.192	163.551	143.448	0.0229734	0.399633	0.413096	1.33154	440
EHI_158570	10875.7	9267.84	12151.8	13533.2	13998.8	15424.9	0.013498	0.303864	0.411609	1.33017	340
EHI_098520	264.931	232.245	199.893	341.981	280.094	301.897	0.0130005	0.298738	0.411161	1.32976	332
EHI_056370	32.4406	38.4027	42.7579	51.6033	51.9055	48.7536	0.0852085	0.671887	0.410979	1.32959	967
EHI_030730	144.631	181.041	120.791	216.909	191.952	186.576	0.0240064	0.410144	0.410339	1.329	448
EHI_153320	45.9575	49.3749	61.999	70.8452	72.4718	66.5674	0.0661442	0.612174	0.409663	1.32838	827
EHI_155370	137.872	163.669	165.687	214.285	190.973	217.516	0.0113218	0.273365	0.409066	1.32783	317
EHI_006040	923.205	931.722	816.677	1181.63	1173.26	1191.65	0.00879036	0.243934	0.408754	1.32754	275
EHI_142190	2.70338	1.8287	3.20685	3.49853	2.93805	3.75028	0.828088	1	0.407617	1.32649	6246
EHI_029390	12.1652	5.4861	17.1032	19.2419	13.7109	12.1884	0.39963	0.944743	0.40756	1.32644	3236
EHI_098490	212.215	188.356	215.928	258.017	292.825	265.332	0.00814351	0.233447	0.40681	1.32575	267
EHI_075160	4.05507	8.22914	10.6895	13.1195	6.85544	11.2508	0.429208	0.953381	0.406426	1.3254	3444
EHI_053820	24.3304	29.2592	14.9653	22.7404	35.2565	33.7525	0.225266	0.849772	0.405971	1.32498	2029
EHI_151790	83.8048	106.979	82.309	117.201	121.439	125.634	0.0285609	0.450733	0.404972	1.32406	485
EHI_148420	56.771	45.7175	45.9648	79.5915	59.7403	55.3166	0.105581	0.713926	0.404615	1.32374	1130
EHI_010330	24.3304	30.1735	13.8963	24.4897	28.4011	38.4403	0.239564	0.858841	0.404606	1.32373	2135
EHI_073450	58.1227	31.0879	41.689	33.236	88.1414	50.6287	0.272548	0.885433	0.404242	1.32339	2356
EHI_192480	168.961	148.125	114.377	189.795	198.808	180.013	0.0246256	0.414915	0.403475	1.32269	454
EHI_041470	5.40676	2.74305	0	1.74926	5.87609	2.81271	0.838344	1	0.403171	1.32241	6325
EHI_010280	44.6058	51.2036	48.1027	62.0989	57.7816	71.2553	0.0681386	0.616563	0.401579	1.32095	844
EHI_170300	63.5294	62.1757	54.5164	74.3437	73.4511	90.0066	0.0606032	0.596209	0.401035	1.32045	778
EHI_031210	50.0125	36.574	39.5511	73.4691	46.0294	45.0033	0.164054	0.791277	0.400906	1.32034	1582
EHI_075650	218.974	87.7775	72.6885	155.685	181.179	159.387	0.206549	0.839312	0.400168	1.31966	1883
EHI_183200	44.6058	34.7453	56.6543	69.9706	58.7609	49.6912	0.136434	0.76995	0.400159	1.31965	1351
EHI_101730	24.3304	45.7175	28.8616	53.3526	38.1946	41.253	0.173544	0.800016	0.399986	1.31949	1656
EHI_038850	2.70338	0	3.20685	1.74926	0	5.62541	1	1	0.399034	1.31862	7396
EHI_039210	59.4744	97.8354	66.2748	104.956	95.9762	97.5072	0.0650432	0.609142	0.398825	1.31843	815
EHI_027790	52.7159	83.2058	64.1369	62.0989	118.501	86.2564	0.129407	0.756195	0.398395	1.31804	1308
EHI_029380	162.203	124.351	125.067	199.416	165.51	173.45	0.0273501	0.439785	0.397731	1.31743	476
EHI_179940	48.6609	52.1179	61.999	80.4662	78.3479	56.2541	0.0931828	0.689102	0.397712	1.31742	1035
EHI_119500	209.512	195.671	144.308	244.022	244.837	233.455	0.0213	0.38858	0.397565	1.31728	419
EHI_019620	18.9237	14.6296	10.6895	21.8658	22.525	13.126	0.353687	0.930856	0.397007	1.31677	2907
EHI_152900	2.70338	12.8009	10.6895	10.4956	15.6696	10.3133	0.433499	0.954545	0.396088	1.31593	3475
EHI_054660	24.3304	31.0879	50.2406	60.3496	38.1946	41.253	0.210208	0.842674	0.396033	1.31588	1908
EHI_001900	109.487	93.2636	75.8953	112.828	128.295	123.759	0.0431579	0.524567	0.395787	1.31566	629
EHI_196520	50.0125	65.8331	54.5164	63.8482	97.9349	64.6923	0.106307	0.715004	0.395785	1.31566	1138
EHI_072500	1.35169	0	6.41369	1.74926	0.979349	7.50055	0.859244	1	0.395483	1.31538	6448
EHI_012560	33.7923	26.5161	22.4479	38.4838	40.1533	29.0646	0.196374	0.827211	0.395331	1.31524	1817
EHI_168190	82.4531	76.8053	88.7227	126.822	98.9142	99.3823	0.0466981	0.533535	0.394955	1.3149	668
EHI_183500	5.40676	18.287	5.34474	20.1165	13.7109	5.62541	0.502125	0.974958	0.39425	1.31426	3933
EHI_190000	29.7372	14.6296	20.31	25.3643	27.4218	30.0022	0.263575	0.882128	0.394174	1.31419	2286
EHI_191510	31.0889	31.0879	25.6548	28.8629	34.2772	52.5039	0.200613	0.834508	0.394166	1.31418	1840
EHI_023010	148.686	178.298	138.963	197.667	218.395	198.765	0.0167131	0.342039	0.393779	1.31383	374
EHI_086550	16.2203	10.9722	29.9306	29.7375	17.6283	27.1895	0.369559	0.932432	0.39349	1.31357	3033
EHI_003950	316.296	388.598	276.858	460.931	396.636	434.095	0.0177033	0.352867	0.393304	1.3134	384
EHI_065220	10.8135	5.4861	4.27579	8.74632	9.79349	7.50055	0.527182	0.980653	0.393175	1.31328	4111
EHI_099310	48.6609	33.8309	67.3437	54.2272	71.4924	70.3177	0.156206	0.786064	0.392769	1.31291	1521
EHI_192620	12.1652	17.3726	10.6895	20.1165	17.6283	15.9387	0.301265	0.901321	0.391936	1.31215	2555
EHI_192530	90.5633	81.3771	57.7232	113.702	97.9349	88.1315	0.07746	0.64928	0.39172	1.31196	912
EHI_071370	32.4406	33.8309	28.8616	47.2301	37.2152	40.3155	0.147678	0.776116	0.391708	1.31195	1453
EHI_189880	27.0338	33.8309	24.5858	41.1077	37.2152	34.6901	0.153475	0.781405	0.390772	1.3111	1502
EHI_192800	3507.64	2911.29	3141.64	3732.93	4794.89	3996.86	0.0226189	0.396286	0.389822	1.31023	436
EHI_124350	117.597	131.666	84.4469	135.568	148.861	153.761	0.0452003	0.533163	0.389584	1.31002	645
EHI_030740	91.9149	72.2336	80.1711	123.323	107.728	86.2564	0.0690461	0.617649	0.387582	1.3082	855
EHI_148230	11442.1	8748.49	11350.1	14417.4	13145.8	13664.1	0.0208927	0.385062	0.386511	1.30723	415
EHI_093920	435.244	339.224	427.579	324.489	683.585	562.541	0.0972045	0.695178	0.386324	1.30706	1070
EHI_153560	41.9024	60.3471	39.5511	48.9794	62.6783	75.9431	0.132997	0.766537	0.386112	1.30687	1328
EHI_127380	25.6821	20.1157	22.4479	29.7375	35.2565	23.4392	0.238368	0.858171	0.385008	1.30587	2124
EHI_084990	4.05507	5.4861	8.55159	9.62095	6.85544	7.50055	0.498407	0.974958	0.38448	1.30539	3910
EHI_152530	78.398	72.2336	102.619	96.2095	115.563	119.071	0.0611006	0.598802	0.384469	1.30538	781
EHI_086890	1.35169	6.40044	0	5.24779	0.979349	4.68785	0.709344	1	0.383481	1.30449	5418
EHI_158580	94.6183	53.0323	80.1711	81.3408	103.811	108.758	0.118914	0.738526	0.382679	1.30376	1231
EHI_027610	183.83	123.437	166.756	207.288	171.386	235.33	0.0498117	0.546758	0.382623	1.30371	697
EHI_182760	82.4531	63.0901	60.9301	100.583	91.0794	75.0055	0.0850049	0.671887	0.382455	1.30356	966
EHI_093930	33.7923	54.861	20.31	47.2301	39.1739	57.1917	0.267765	0.88301	0.382242	1.30337	2321
EHI_065370	18.9237	24.6874	29.9306	15.7434	38.1946	43.1282	0.32408	0.918226	0.382186	1.30331	2697
EHI_059660	129.762	210.3	173.17	251.019	231.126	191.264	0.0447668	0.533163	0.381939	1.30309	639
EHI_152780	542.028	606.214	493.854	661.222	697.296	782.87	0.0208016	0.384578	0.381937	1.30309	414
EHI_127100	85.1565	82.2914	71.6195	143.44	66.5957	100.32	0.147993	0.776116	0.381547	1.30274	1459
EHI_044170	13.5169	16.4583	4.27579	11.3702	22.525	11.2508	0.448573	0.95928	0.380922	1.30217	3575
EHI_010370	62.1778	84.1201	36.3442	69.0959	77.3685	92.8193	0.17513	0.800016	0.38046	1.30176	1675
EHI_090270	52.7159	42.9744	58.7922	76.9676	72.4718	50.6287	0.127395	0.752378	0.380271	1.30159	1296
EHI_155580	117.597	78.634	74.8264	127.696	101.852	119.071	0.0856171	0.671887	0.379961	1.30131	972
EHI_160730	104.08	106.979	85.5159	130.32	120.46	135.01	0.0345025	0.489948	0.379573	1.30096	539
EHI_178120	79.7497	85.0345	98.3433	116.326	108.708	118.134	0.0395135	0.508297	0.379492	1.30088	595
EHI_001880	78.398	74.9766	83.378	85.714	90.1001	132.197	0.0882018	0.677808	0.379359	1.30076	996
EHI_140170	7213.97	6906.99	8121.87	9664.69	9673.03	9593.21	0.0158759	0.33379	0.379277	1.30069	364
EHI_186780	20.2754	11.8865	20.31	17.4926	24.4837	25.3144	0.320572	0.91657	0.379066	1.3005	2677
EHI_145840	7039.6	7077.06	6986.65	8577.52	9979.56	8868.47	0.0159176	0.33379	0.378019	1.29956	365
EHI_054480	1393.59	1763.78	2099.41	2190.08	2418.01	2222.98	0.0369836	0.503411	0.37718	1.2988	562
EHI_092100	6.75845	11.8865	11.7584	21.8658	6.85544	11.2508	0.437799	0.95824	0.37702	1.29866	3496
EHI_127370	1.35169	4.57175	2.1379	0.874632	3.91739	6.56298	0.689273	1	0.376696	1.29836	5269
EHI_187090	28.3855	14.6296	21.379	19.2419	24.4837	38.4403	0.349968	0.92922	0.37647	1.29816	2882
EHI_177870	21.627	70.4049	50.2406	64.7228	57.7816	65.6298	0.222607	0.846567	0.374069	1.296	2012
EHI_022900	24.3304	26.5161	41.689	45.4809	43.0913	31.8773	0.211368	0.843927	0.373489	1.29548	1917
EHI_009840	393.342	304.478	405.131	400.582	517.096	509.1	0.0339076	0.485101	0.373352	1.29536	535
EHI_154580	6.75845	2.74305	9.62054	2.6239	8.81414	13.126	0.655841	0.99492	0.372797	1.29486	5034
EHI_192490	71.6396	96.0067	58.7922	109.329	78.3479	106.883	0.108012	0.719119	0.371975	1.29412	1149
EHI_197880	20.2754	26.5161	19.2411	15.7434	37.2152	33.7525	0.318264	0.915727	0.371917	1.29407	2659
EHI_133910	13.5169	6.40044	0	9.62095	3.91739	11.2508	0.631953	0.99492	0.371742	1.29391	4843
EHI_025390	143.279	146.296	98.3433	141.69	185.097	175.325	0.0616873	0.600968	0.371323	1.29354	783
EHI_012000	40.5507	38.4027	28.8616	48.9794	39.1739	50.6287	0.164469	0.791277	0.370802	1.29307	1587
EHI_128190	14.8686	33.8309	33.1374	27.9882	43.0913	37.5028	0.246058	0.866696	0.370669	1.29295	2173
EHI_103390	243.304	223.101	227.686	313.118	258.548	323.461	0.018147	0.353545	0.369891	1.29226	392
EHI_107900	35.1439	55.7753	44.8958	59.475	46.0294	72.1928	0.165354	0.791277	0.369669	1.29206	1597
EHI_039470	5.40676	15.5439	6.41369	18.3673	9.79349	8.43812	0.526374	0.980653	0.369359	1.29178	4106
EHI_036590	44.6058	27.4305	44.8958	57.7257	48.9674	42.1906	0.190312	0.818139	0.368808	1.29129	1780
EHI_097180	51.3642	37.4883	40.62	56.8511	52.8848	55.3166	0.134457	0.769799	0.368607	1.29111	1336
EHI_104910	9.46183	4.57175	9.62054	7.87169	16.6489	5.62541	0.528078	0.980653	0.368385	1.29091	4120
EHI_180180	75.6947	62.1757	73.7574	107.58	77.3685	86.2564	0.0969036	0.693826	0.36811	1.29066	1069
EHI_112040	185.182	251.446	205.238	249.27	306.536	276.583	0.0275549	0.44215	0.36698	1.28965	477
EHI_134710	2.70338	5.4861	2.1379	4.37316	6.85544	2.81271	0.585161	0.987974	0.366249	1.289	4528
EHI_079980	447.41	350.196	425.441	574.633	499.468	498.787	0.0262334	0.43088	0.366193	1.28895	466
EHI_151730	85.1565	98.7497	71.6195	123.323	101.852	105.008	0.0654487	0.609142	0.366173	1.28893	821
EHI_152150	59.4744	51.2036	78.0332	82.2154	97.9349	62.8171	0.136214	0.76995	0.365636	1.28845	1350
EHI_031260	170.313	146.296	161.411	206.413	209.581	197.827	0.0211167	0.386668	0.365575	1.28839	418
EHI_081780	25.6821	42.0601	25.6548	41.1077	40.1533	41.253	0.192824	0.822286	0.36513	1.288	1794
EHI_062090	12.1652	17.3726	26.7237	20.1165	13.7109	39.3779	0.41146	0.947145	0.365121	1.28799	3322
EHI_106360	135.169	160.011	164.618	195.918	203.704	195.014	0.0209284	0.385062	0.364294	1.28725	416
EHI_156310	275.745	380.369	247.996	485.421	322.206	358.151	0.0728236	0.634283	0.364134	1.28711	878
EHI_078190	77.0463	72.2336	74.8264	122.449	85.2033	79.6934	0.105083	0.713926	0.363923	1.28692	1126
EHI_153110	36.4956	51.2036	48.1027	64.7228	47.9881	63.7547	0.142844	0.76995	0.363803	1.28681	1420
EHI_098740	51.3642	52.1179	52.3785	74.3437	50.9261	75.0055	0.127961	0.753766	0.363656	1.28668	1298
EHI_053090	12.1652	10.9722	5.34474	9.62095	18.6076	8.43812	0.500121	0.974958	0.362463	1.28562	3921
EHI_128090	17.572	8.22914	4.27579	13.1195	13.7109	10.3133	0.512032	0.974958	0.362406	1.28557	4009
EHI_100420	0	2.74305	3.20685	1.74926	2.93805	3.75028	0.807217	1	0.361877	1.2851	6096
EHI_008070	33.7923	80.4627	60.9301	76.9676	91.0794	60.942	0.193844	0.82376	0.361873	1.28509	1801
EHI_160850	181.127	148.125	165.687	214.285	203.704	214.703	0.0243963	0.412207	0.360975	1.28429	453
EHI_042220	25.6821	25.6018	12.8274	35.8599	24.4837	21.5641	0.363541	0.930992	0.360833	1.28417	2983
EHI_008460	41.9024	42.0601	41.689	57.7257	54.8435	48.7536	0.127364	0.752378	0.360467	1.28384	1295
EHI_099790	11854.3	8134.05	11814	14251.3	12616	13956.7	0.0475976	0.535563	0.360416	1.2838	679
EHI_024500	59.4744	75.891	69.4816	98.8334	83.2446	82.5061	0.0775504	0.64928	0.359553	1.28303	913
EHI_007910	82.4531	90.5206	84.4469	112.828	109.687	108.758	0.0456404	0.533163	0.359501	1.28298	654
EHI_025210	1.35169	2.74305	10.6895	8.74632	7.83479	2.81271	0.69916	1	0.359442	1.28293	5342
EHI_006820	121.652	126.18	106.895	163.556	152.778	138.76	0.0384828	0.507906	0.359216	1.28273	579
EHI_155670	21.627	29.2592	19.2411	27.1136	33.2978	30.9398	0.221534	0.846409	0.358836	1.28239	1995
EHI_109850	320.351	277.962	299.306	376.966	398.595	373.153	0.017686	0.352867	0.358441	1.28204	383
EHI_111600	1.35169	0.914349	6.41369	0.874632	5.87609	4.68785	0.853253	1	0.357659	1.28135	6405
EHI_051920	4.05507	3.6574	7.48264	6.12243	10.7728	2.81271	0.668504	0.99492	0.357518	1.28122	5139
EHI_117830	59.4744	59.4327	66.2748	78.7169	67.575	90.9442	0.101602	0.703631	0.357243	1.28098	1105
EHI_121720	171.665	150.868	204.169	211.661	245.816	216.578	0.0359428	0.498827	0.357003	1.28076	550
EHI_117930	16.2203	12.8009	11.7584	20.9912	9.79349	20.6265	0.418986	0.948892	0.356831	1.28061	3379
EHI_012110	47.3092	38.4027	36.3442	50.7287	46.0294	58.1293	0.160157	0.791277	0.356553	1.28036	1544
EHI_100400	64.8811	72.2336	79.1022	83.0901	84.224	110.633	0.0894575	0.681654	0.356164	1.28002	1004
EHI_186930	124.356	80.4627	120.791	126.822	162.572	124.697	0.0964917	0.693826	0.356072	1.27994	1063
EHI_182880	160.851	155.439	132.55	184.547	177.262	211.891	0.0334706	0.481702	0.355986	1.27986	530
EHI_191780	78.398	90.5206	78.0332	103.207	124.377	90.0066	0.0785983	0.651346	0.355536	1.27946	923
EHI_192580	12.1652	18.287	14.9653	23.6151	17.6283	17.8138	0.336071	0.920024	0.355226	1.27919	2793
EHI_187780	132.466	128.009	118.653	142.565	182.159	160.324	0.0390279	0.508297	0.354967	1.27896	587
EHI_171300	4814.72	3597.96	5037.95	5474.32	5517.65	6205.77	0.0452786	0.533163	0.354776	1.27879	646
EHI_183050	148.686	126.18	149.653	185.422	174.324	180.951	0.0319173	0.469798	0.354541	1.27858	520
EHI_107150	74.343	66.7475	44.8958	70.8452	94.9968	71.2553	0.148044	0.776116	0.354184	1.27826	1460
EHI_104360	2773.67	2583.04	2550.51	3293.86	3533.49	3275.87	0.0237121	0.406023	0.353715	1.27785	447
EHI_011930	50.0125	46.6318	44.8958	55.9765	65.6164	59.0669	0.115594	0.73146	0.353625	1.27777	1208
EHI_012450	0	2.74305	3.20685	6.99706	0.979349	0	0.832084	1	0.352685	1.27693	6273
EHI_201610	0	2.74305	1.06895	2.6239	1.9587	0.937569	1	1	0.352418	1.2767	7396
EHI_100360	52.7159	50.2892	56.6543	69.9706	82.2653	51.5663	0.142187	0.76995	0.351579	1.27596	1410
EHI_196790	0	1.8287	4.27579	3.49853	1.9587	2.81271	0.808269	1	0.351527	1.27591	6102
EHI_117950	81.1014	69.4905	109.033	99.7081	128.295	103.133	0.106053	0.713926	0.351283	1.27569	1137
EHI_107200	27.0338	26.5161	17.1032	34.1107	32.3185	23.4392	0.289136	0.896709	0.350931	1.27538	2466
EHI_127710	0	3.6574	9.62054	3.49853	7.83479	6.56298	0.578606	0.986544	0.350364	1.27488	4488
EHI_130260	6.75845	6.40044	4.27579	10.4956	6.85544	4.68785	0.57786	0.986383	0.350073	1.27463	4484
EHI_062300	52.7159	27.4305	65.2059	78.7169	66.5957	38.4403	0.327433	0.918226	0.350013	1.27457	2718
EHI_020090	21.627	30.1735	39.5511	37.6092	33.2978	46.8785	0.233218	0.853522	0.349612	1.27422	2088
EHI_097970	198.698	275.219	199.893	318.366	255.61	287.834	0.0453823	0.533163	0.349467	1.27409	650
EHI_088440	20.2754	18.287	18.1721	32.3614	19.587	19.689	0.341421	0.922371	0.349439	1.27407	2830
EHI_148210	147.334	155.439	113.309	147.813	187.056	195.952	0.0633037	0.601887	0.349182	1.27384	805
EHI_056430	13.5169	9.14349	10.6895	15.7434	12.7315	13.126	0.485045	0.968413	0.348749	1.27346	3826
EHI_077260	22.9787	13.7152	23.5169	21.8658	30.3598	23.4392	0.323209	0.918226	0.348611	1.27333	2693
EHI_152200	105.432	166.412	156.066	224.78	172.365	150.949	0.0959074	0.693269	0.348352	1.27311	1058
EHI_199840	35.1439	67.6618	56.6543	76.9676	62.6783	66.5674	0.152663	0.780552	0.347844	1.27266	1497
EHI_114210	45.9575	51.2036	61.999	62.9735	68.5544	72.1928	0.112234	0.729853	0.347589	1.27243	1177
EHI_156380	59.4744	73.1479	106.895	98.8334	103.811	104.07	0.117322	0.733047	0.3475	1.27235	1225
EHI_160880	198.698	204.814	173.17	277.258	201.746	254.081	0.0434037	0.525919	0.34737	1.27224	631
EHI_096740	39.199	53.0323	38.4821	58.6004	61.699	47.816	0.147201	0.776116	0.347304	1.27218	1449
EHI_044730	1736.92	1590.05	1955.11	2274.04	2266.21	2177.97	0.0312209	0.468385	0.347123	1.27202	508
EHI_153760	43.2541	32.9166	34.2063	59.475	32.3185	46.8785	0.249776	0.870248	0.347096	1.272	2196
EHI_077760	4.05507	3.6574	3.20685	6.12243	2.93805	4.68785	0.716968	1	0.346599	1.27156	5474
EHI_024480	17.572	12.8009	7.48264	16.618	12.7315	17.8138	0.431696	0.954144	0.346359	1.27135	3463
EHI_152950	18.9237	21.03	7.48264	19.2419	24.4837	16.8762	0.405001	0.944743	0.346325	1.27132	3279
EHI_041940	31.0889	49.3749	37.4132	49.854	52.8848	49.6912	0.164618	0.791277	0.345644	1.27072	1589
EHI_099320	16.2203	28.3448	18.1721	28.8629	27.4218	25.3144	0.275289	0.886525	0.34559	1.27067	2375
EHI_036560	51.3642	35.6596	40.62	62.0989	57.7816	40.3155	0.21282	0.846409	0.34548	1.27057	1923
EHI_101410	350.088	442.545	360.236	580.756	441.686	444.408	0.0482046	0.539412	0.345419	1.27052	684
EHI_020470	2.70338	13.7152	2.1379	6.99706	6.85544	11.2508	0.590849	0.98878	0.345223	1.27035	4572
EHI_118690	22.9787	22.8587	17.1032	25.3643	28.4011	26.2519	0.303545	0.901321	0.344972	1.27013	2577
EHI_063010	21.627	27.4305	30.9995	18.3673	48.9674	35.6276	0.356739	0.930992	0.344569	1.26977	2932
EHI_130710	21.627	30.1735	34.2063	32.3614	30.3598	47.816	0.257124	0.876793	0.344063	1.26933	2243
EHI_081260	48.6609	48.4605	40.62	55.1018	60.7196	59.0669	0.141349	0.76995	0.34371	1.26902	1401
EHI_010140	43.2541	44.8031	24.5858	48.1048	45.05	49.6912	0.22022	0.846409	0.343595	1.26891	1986
EHI_146100	8.11014	3.6574	4.27579	5.24779	7.83479	6.56298	0.765328	1	0.343389	1.26873	5796
EHI_108460	60.8261	84.1201	57.7232	104.081	89.1207	65.6298	0.153799	0.781405	0.343307	1.26866	1504
EHI_031740	10.8135	9.14349	13.8963	11.3702	14.6902	16.8762	0.443598	0.95824	0.342378	1.26784	3541
EHI_107930	555.545	485.519	534.474	664.72	690.441	640.36	0.0301227	0.463302	0.342197	1.26769	497
EHI_008810	150.038	180.127	162.48	229.154	219.374	178.138	0.0412587	0.519337	0.342114	1.26761	608
EHI_024220	133.817	74.0623	110.102	97.9588	165.51	136.885	0.174329	0.800016	0.34199	1.2675	1665
EHI_181610	5.40676	8.22914	5.34474	1.74926	14.6902	8.43812	0.587357	0.987974	0.341936	1.26746	4545
EHI_140000	74.343	75.891	68.4127	106.705	71.4924	98.4448	0.115813	0.73146	0.341856	1.26739	1210
EHI_135060	4994.5	3917.07	4879.75	5688.61	5898.62	5886.06	0.0388648	0.507906	0.341626	1.26718	583
EHI_103880	277.097	215.786	281.133	306.121	341.793	330.024	0.0328712	0.478902	0.341376	1.26696	525
EHI_032790	1.35169	1.8287	3.20685	3.49853	0	4.68785	0.810581	1	0.341144	1.26676	6119
EHI_052750	29.7372	26.5161	30.9995	38.4838	26.4424	45.0033	0.281831	0.889915	0.340713	1.26638	2423
EHI_121870	50.0125	53.0323	44.8958	60.3496	67.575	60.0044	0.127093	0.752378	0.340556	1.26624	1292
EHI_137100	33.7923	34.7453	27.7927	52.4779	41.1326	28.1271	0.278859	0.887051	0.340144	1.26588	2402
EHI_093720	66.2328	67.6618	47.0337	77.8423	64.637	86.2564	0.148968	0.77889	0.339974	1.26573	1462
EHI_111190	0	1.8287	0	0	0	2.81271	1	1	0.339173	1.26503	7367
EHI_058920	14440.1	13054.2	14883	17745.4	18177.7	17669.4	0.0298318	0.462825	0.338773	1.26468	493
EHI_183030	51.3642	53.9466	87.6538	79.5915	96.9555	68.4425	0.180729	0.807657	0.33837	1.26433	1710
EHI_152700	98.6734	63.0901	89.7917	107.58	124.377	83.4437	0.15015	0.77889	0.338125	1.26411	1474
EHI_054670	113.542	117.037	111.171	153.061	117.522	161.262	0.067365	0.616563	0.338074	1.26407	833
EHI_096490	35.1439	41.1457	32.0685	32.3614	63.6577	42.1906	0.266472	0.882727	0.338065	1.26406	2308
EHI_005980	33.7923	38.4027	41.689	43.7316	66.5957	34.6901	0.241834	0.862856	0.337939	1.26395	2143
EHI_192730	20.2754	22.8587	14.9653	34.9853	20.5663	17.8138	0.389874	0.938375	0.337935	1.26395	3179
EHI_064430	66.2328	65.8331	83.378	90.0871	104.79	77.8182	0.117318	0.733047	0.337051	1.26317	1224
EHI_124190	77.0463	73.1479	96.2054	105.83	110.666	94.6945	0.0911593	0.685396	0.336563	1.26274	1018
EHI_014100	123.004	132.581	104.757	160.058	123.398	171.575	0.0799193	0.656333	0.336166	1.2624	932
EHI_013100	43.2541	36.574	21.379	50.7287	44.0707	31.8773	0.299343	0.901305	0.33613	1.26237	2540
EHI_178570	436.596	356.596	510.957	439.94	610.134	595.356	0.0748121	0.640371	0.335936	1.2622	893
EHI_092630	50.0125	38.4027	65.2059	69.0959	66.5957	57.1917	0.18812	0.816077	0.335618	1.26192	1760
EHI_089880	1.35169	0.914349	2.1379	1.74926	2.93805	0.937569	0.768485	1	0.335598	1.2619	5824
EHI_164850	87.8599	102.407	105.826	118.95	129.274	127.509	0.0567814	0.579473	0.33546	1.26178	750
EHI_139080	32.4406	44.8031	45.9648	64.7228	47.0087	45.0033	0.197912	0.828619	0.335184	1.26154	1828
EHI_016380	20.2754	18.287	16.0342	26.239	18.6076	23.4392	0.335031	0.919774	0.334845	1.26124	2788
EHI_052790	77.0463	91.4349	86.5848	104.081	116.542	103.133	0.0714307	0.630207	0.334762	1.26117	867
EHI_083610	16.2203	28.3448	39.5511	27.1136	48.9674	31.8773	0.342644	0.922371	0.334107	1.2606	2842
EHI_142910	47.3092	50.2892	40.62	57.7257	58.7609	58.1293	0.140265	0.76995	0.333782	1.26031	1393
EHI_095460	4.05507	1.8287	1.06895	0	1.9587	6.56298	1	1	0.333719	1.26026	7396
EHI_028970	66.2328	75.891	55.5853	81.3408	88.1414	80.6309	0.112843	0.730271	0.33248	1.25918	1180
EHI_085710	5.40676	11.8865	7.48264	13.9941	10.7728	7.50055	0.511021	0.974958	0.33234	1.25905	4002
EHI_035260	44.6058	53.9466	59.8611	65.5974	74.4305	60.942	0.141219	0.76995	0.331195	1.25805	1399
EHI_117990	37.8473	34.7453	41.689	42.857	57.7816	43.1282	0.204812	0.836515	0.329856	1.25689	1874
EHI_026480	1746.38	1921.96	1737.04	2110.49	2278.94	2405.8	0.0376835	0.504821	0.329772	1.25681	569
EHI_119030	2.70338	0.914349	5.34474	6.12243	1.9587	2.81271	0.844929	1	0.329671	1.25673	6367
EHI_155780	195.995	126.18	184.928	178.425	216.436	239.08	0.0956471	0.693183	0.329461	1.25654	1056
EHI_151940	29.7372	30.1735	47.0337	42.857	47.9881	44.0657	0.219377	0.846409	0.329027	1.25617	1974
EHI_139000	206.809	242.303	182.79	269.387	273.238	253.144	0.0387928	0.507906	0.328964	1.25611	582
EHI_093980	33.7923	20.1157	14.9653	28.8629	31.3392	24.3768	0.393545	0.940135	0.328175	1.25542	3204
EHI_053430	51.3642	39.317	29.9306	45.4809	50.9261	53.4414	0.222384	0.846409	0.328067	1.25533	2011
EHI_148350	187.885	222.187	230.893	277.258	270.3	259.707	0.033152	0.480424	0.327943	1.25522	528
EHI_098020	191.94	202.071	159.273	278.133	184.118	231.58	0.0814606	0.664474	0.327762	1.25506	938
EHI_200760	75.6947	103.321	70.5506	128.571	103.811	82.5061	0.151263	0.77889	0.327614	1.25494	1485
EHI_009405	54.0676	55.7753	68.4127	82.2154	67.575	74.068	0.131189	0.76109	0.327444	1.25479	1319
EHI_150660	2.70338	0.914349	1.06895	1.74926	1.9587	1.87514	1	1	0.327416	1.25476	7318
EHI_198840	102.728	135.324	126.136	168.804	129.274	161.262	0.0742088	0.638196	0.327347	1.2547	890
EHI_110200	71.6396	51.2036	45.9648	74.3437	57.7816	76.8807	0.204765	0.836515	0.326426	1.2539	1873
EHI_173070	67.5845	72.2336	44.8958	76.9676	95.9762	59.0669	0.201895	0.83472	0.326354	1.25384	1847
EHI_031280	44.6058	59.4327	11.7584	49.854	49.9468	45.9409	0.439836	0.95824	0.32633	1.25382	3507
EHI_194075	162.203	96.0067	167.825	160.058	189.014	181.888	0.125899	0.751682	0.326157	1.25367	1280
EHI_192420	216.27	226.759	197.755	262.39	278.135	263.457	0.0301204	0.463302	0.32591	1.25345	496
EHI_178920	548.786	718.679	675.575	895.623	747.243	795.059	0.0555738	0.572492	0.325466	1.25307	743
EHI_151630	1209.76	757.996	1097.81	1236.73	1341.71	1258.22	0.0844963	0.671583	0.325296	1.25292	963
EHI_194180	47.3092	45.7175	35.2753	40.2331	59.7403	60.942	0.222649	0.846567	0.325018	1.25268	2013
EHI_142150	296.02	319.108	292.892	358.599	404.471	375.965	0.0311688	0.468385	0.325015	1.25268	507
EHI_006910	143.279	138.067	161.411	182.798	186.076	185.639	0.0418219	0.520908	0.324833	1.25252	612
EHI_182630	213.567	198.414	203.1	239.649	243.858	285.959	0.0370498	0.503411	0.324801	1.25249	563
EHI_017770	0	1.8287	0	2.6239	0	0	1	1	0.324632	1.25234	7396
EHI_091950	62.1778	64.9188	53.4474	66.472	89.1207	71.2553	0.135492	0.76995	0.32461	1.25233	1343
EHI_014090	36.4956	63.0901	28.8616	60.3496	54.8435	47.816	0.262816	0.881931	0.324521	1.25225	2280
EHI_050670	510.939	971.953	600.749	1039.06	673.792	900.066	0.170129	0.799107	0.324477	1.25221	1628
EHI_098480	31.0889	18.287	13.8963	33.236	28.4011	15.9387	0.447807	0.95928	0.324474	1.25221	3569
EHI_114180	45.9575	25.6018	33.1374	29.7375	51.9055	47.816	0.33093	0.918226	0.324409	1.25215	2750
EHI_024510	294.668	329.166	266.168	361.223	419.161	335.65	0.0436391	0.527668	0.32422	1.25199	633
EHI_199720	232.491	360.254	230.893	348.978	363.338	323.461	0.0798333	0.656333	0.324141	1.25192	930
EHI_197130	29.7372	25.6018	36.3442	35.8599	44.0707	34.6901	0.251111	0.871243	0.323992	1.25179	2206
EHI_107260	105.432	84.1201	100.481	129.446	136.129	95.632	0.114882	0.73146	0.323589	1.25144	1202
EHI_166860	314.944	287.106	250.134	383.089	367.256	314.086	0.0448141	0.533163	0.323477	1.25134	641
EHI_060750	27.0338	28.3448	28.8616	41.9823	40.1533	23.4392	0.306577	0.903946	0.3233	1.25119	2594
EHI_055650	20.2754	24.6874	22.4479	35.8599	25.4631	23.4392	0.316859	0.91415	0.32325	1.25115	2653
EHI_166410	10.8135	9.14349	16.0342	8.74632	23.5044	13.126	0.522888	0.978918	0.323146	1.25106	4088
EHI_184520	204.105	199.328	204.169	238.775	268.341	253.144	0.0329738	0.478902	0.323078	1.251	527
EHI_072070	402.804	470.89	429.717	559.765	512.199	560.666	0.0375786	0.504821	0.322968	1.2509	567
EHI_004760	17.572	6.40044	10.6895	17.4926	12.7315	11.2508	0.590318	0.98878	0.322449	1.25045	4567
EHI_040610	198.698	118.865	141.101	179.3	201.746	187.514	0.10953	0.72144	0.322162	1.2502	1161
EHI_182040	214.919	239.56	171.032	262.39	243.858	276.583	0.0537971	0.562055	0.322033	1.25009	732
EHI_129930	58.1227	56.6897	35.2753	74.3437	41.1326	71.2553	0.288129	0.896115	0.321282	1.24944	2461
EHI_119490	152.741	145.382	182.79	207.288	213.498	180.013	0.0545602	0.566626	0.321229	1.24939	737
EHI_061980	524.456	656.503	530.198	697.957	728.635	714.428	0.0501396	0.54824	0.32121	1.24938	700
EHI_134600	0	0.914349	1.06895	0.874632	0.979349	0.937569	1	1	0.321188	1.24936	7327
EHI_095080	160.851	188.356	221.272	223.906	248.755	242.83	0.0527797	0.556266	0.321121	1.2493	726
EHI_135100	14.8686	18.287	18.1721	21.8658	6.85544	35.6276	0.531462	0.981852	0.321027	1.24922	4143
EHI_063560	137.872	96.0067	115.446	134.693	154.737	143.448	0.0918249	0.686172	0.320483	1.24875	1023
EHI_008720	43.2541	45.7175	54.5164	66.472	53.8642	59.0669	0.174499	0.800016	0.320138	1.24845	1667
EHI_045180	166.258	191.099	211.652	230.028	240.92	241.893	0.0428392	0.522119	0.320064	1.24839	628
EHI_045450	1.35169	0.914349	0	0	2.93805	0	1	1	0.319922	1.24826	7367
EHI_155650	22.9787	38.4027	20.31	41.1077	35.2565	27.1895	0.329682	0.918226	0.319768	1.24813	2739
EHI_144610	413.617	511.121	489.578	772.3	465.191	528.789	0.110502	0.72412	0.319694	1.24807	1168
EHI_137890	156.796	133.495	116.515	151.311	178.241	176.263	0.0752774	0.640371	0.319481	1.24788	899
EHI_012360	140.576	117.951	121.86	178.425	172.365	121.884	0.102905	0.703631	0.319201	1.24764	1118
EHI_011260	62.1778	77.7197	75.8953	105.83	82.2653	82.5061	0.127101	0.752378	0.319178	1.24762	1293
EHI_103780	1284.11	1193.23	1184.39	1492.12	1550.31	1523.55	0.0393226	0.508297	0.318747	1.24725	590
EHI_062530	62.1778	40.2314	30.9995	50.7287	56.8022	56.2541	0.27137	0.884361	0.317355	1.24604	2346
EHI_134820	175.72	265.161	202.031	325.363	225.25	253.144	0.102124	0.703631	0.316377	1.2452	1109
EHI_080230	8.11014	5.4861	3.20685	6.99706	7.83479	5.62541	0.658466	0.99492	0.316174	1.24502	5060
EHI_087830	140.576	168.24	107.964	175.801	163.551	180.951	0.0911496	0.685396	0.316062	1.24493	1017
EHI_079985	0	0	2.1379	0.874632	1.9587	0	1	1	0.315943	1.24483	7367
EHI_055360	55.4193	70.4049	47.0337	79.5915	63.6577	73.1304	0.16491	0.791277	0.315815	1.24471	1594
EHI_062960	240.601	186.527	258.686	262.39	316.33	272.833	0.0655527	0.609142	0.315641	1.24456	822
EHI_009700	98.6734	103.321	100.481	105.83	152.778	119.071	0.102235	0.703631	0.315451	1.2444	1111
EHI_011990	2.70338	0.914349	3.20685	6.12243	0.979349	0.937569	1	1	0.315265	1.24424	7396
EHI_098970	2.70338	10.9722	3.20685	5.24779	5.87609	11.2508	0.61641	0.994383	0.314785	1.24383	4741
EHI_156440	208.16	273.39	211.652	300.873	269.321	295.334	0.0506671	0.550944	0.314721	1.24377	703
EHI_200980	205.457	190.185	189.204	269.387	237.002	219.391	0.0476507	0.535563	0.314699	1.24375	681
EHI_006160	350.088	316.365	330.305	421.573	433.851	382.528	0.0358789	0.498827	0.314444	1.24353	547
EHI_197530	89.2116	88.6919	115.446	124.198	132.212	108.758	0.100055	0.699798	0.313908	1.24307	1094
EHI_023890	343.329	316.365	240.513	356.85	378.029	382.528	0.0603899	0.594995	0.313898	1.24306	776
EHI_080590	52.7159	58.5184	67.3437	73.4691	80.3066	69.3801	0.142831	0.76995	0.313859	1.24303	1418
EHI_190450	98.6734	65.8331	101.55	110.204	125.357	92.8193	0.164676	0.791277	0.313574	1.24278	1590
EHI_192250	36.4956	36.574	25.6548	41.1077	43.0913	38.4403	0.244775	0.865594	0.31351	1.24273	2164
EHI_202480	1.35169	0.914349	0	0.874632	1.9587	0	1	1	0.313398	1.24263	7396
EHI_000630	31.0889	32.0022	26.7237	47.2301	27.4218	36.5652	0.293137	0.897438	0.313287	1.24254	2496
EHI_152480	0	0.914349	1.06895	2.6239	0	0	1	1	0.313123	1.24239	7367
EHI_137010	2.70338	0	4.27579	5.24779	1.9587	0.937569	1	1	0.312972	1.24226	7396
EHI_159870	562.303	494.663	477.82	826.527	531.786	545.665	0.111108	0.726858	0.312749	1.24207	1170
EHI_159530	118.949	74.9766	96.2054	133.819	117.522	105.008	0.14777	0.776116	0.31254	1.24189	1455
EHI_151770	48.6609	46.6318	45.9648	70.8452	38.1946	65.6298	0.251921	0.871243	0.312331	1.24171	2212
EHI_050620	305.482	320.937	243.72	398.832	345.71	335.65	0.0579634	0.583385	0.312237	1.24163	760
EHI_172020	6.75845	4.57175	19.2411	14.8687	12.7315	10.3133	0.550879	0.982629	0.311874	1.24132	4285
EHI_106110	182.478	158.182	149.653	201.165	201.746	203.452	0.0517529	0.554469	0.311838	1.24129	714
EHI_005050	17.572	22.8587	20.31	21.8658	31.3392	23.4392	0.340518	0.922371	0.311695	1.24116	2824
EHI_152800	278.448	254.189	259.754	377.841	297.722	305.648	0.0489421	0.545554	0.311455	1.24096	686
EHI_121800	5990.69	5761.31	6267.24	7915.42	7381.35	7063.65	0.0461098	0.533163	0.311444	1.24095	661
EHI_100500	151.389	142.638	136.825	170.553	189.994	173.45	0.0539045	0.562105	0.311172	1.24071	734
EHI_073340	156.796	137.152	145.377	179.3	179.221	184.701	0.0506748	0.550944	0.311043	1.2406	704
EHI_160950	159.499	215.786	178.514	223.906	214.477	252.206	0.0636408	0.603602	0.310649	1.24027	807
EHI_086050	10.8135	14.6296	14.9653	21.8658	14.6902	14.0635	0.436863	0.957538	0.310617	1.24024	3492
EHI_049890	31.0889	30.1735	51.3095	50.7287	42.112	46.8785	0.273474	0.886525	0.310445	1.24009	2361
EHI_102030	68.9362	67.6618	47.0337	83.0901	84.224	60.0044	0.204024	0.835591	0.310391	1.24004	1868
EHI_084700	85.1565	77.7197	113.309	109.329	125.357	107.82	0.128024	0.753766	0.310151	1.23984	1300
EHI_082050	50.0125	41.1457	76.9643	70.8452	75.4098	61.8796	0.246645	0.867076	0.309828	1.23956	2177
EHI_050390	71.6396	69.4905	66.2748	80.4662	99.8935	76.8807	0.140135	0.76995	0.309796	1.23953	1391
EHI_163490	339.274	311.793	345.27	391.835	425.037	417.218	0.036597	0.501895	0.30971	1.23946	556
EHI_110560	189.237	139.895	169.963	158.308	231.126	226.892	0.114762	0.73146	0.309018	1.23886	1200
EHI_014210	105.432	108.808	72.6885	112.828	132.212	110.633	0.136846	0.76995	0.309	1.23885	1355
EHI_151570	296.02	287.106	240.513	367.346	302.619	348.776	0.0524869	0.555416	0.308669	1.23856	723
EHI_050370	47.3092	88.6919	69.4816	97.9588	78.3479	81.5685	0.188034	0.816077	0.308403	1.23834	1759
EHI_100370	98.6734	128.923	109.033	135.568	137.109	147.198	0.0788846	0.652738	0.308246	1.2382	925
EHI_015550	1.35169	0.914349	0	1.74926	0.979349	0	1	1	0.308032	1.23802	7396
EHI_061000	108.135	72.2336	68.4127	104.956	101.852	97.5072	0.162301	0.791277	0.307813	1.23783	1564
EHI_124490	58.1227	97.8354	50.2406	99.7081	74.4305	83.4437	0.233785	0.853522	0.307425	1.2375	2093
EHI_104660	15324.1	13153.8	15491.2	18418	18093.5	17898.2	0.0522485	0.555416	0.307423	1.2375	719
EHI_192470	877.247	1025.9	847.676	1223.61	1083.16	1098.83	0.0575352	0.581737	0.307317	1.2374	757
EHI_162800	1.35169	0	1.06895	0	0.979349	1.87514	1	1	0.306443	1.23666	7327
EHI_148720	135.169	130.752	123.998	153.061	171.386	157.512	0.0623381	0.600968	0.30621	1.23646	790
EHI_188880	164.906	140.81	159.273	186.297	184.118	202.515	0.0590471	0.588472	0.306134	1.23639	768
EHI_082260	1.35169	0.914349	0	1.74926	0	0.937569	1	1	0.306032	1.2363	7396
EHI_126960	67.5845	85.0345	96.2054	104.956	95.9762	108.758	0.124413	0.750402	0.306027	1.2363	1269
EHI_062790	1144.88	1057.9	988.777	1388.92	1295.68	1259.16	0.0526921	0.556266	0.305917	1.2362	725
EHI_099710	6.75845	8.22914	4.27579	9.62095	8.81414	5.62541	0.596629	0.989416	0.305776	1.23608	4615
EHI_021350	72.9913	58.5184	69.4816	73.4691	104.79	69.3801	0.196161	0.827211	0.305637	1.23596	1815
EHI_141840	91.9149	59.4327	79.1022	85.714	88.1414	107.82	0.17896	0.805645	0.304253	1.23478	1699
EHI_023850	47.3092	57.604	28.8616	57.7257	48.9674	59.0669	0.280185	0.887051	0.303579	1.2342	2416
EHI_182580	74.343	60.3471	48.1027	76.093	76.3892	71.2553	0.188493	0.816077	0.303513	1.23415	1764
EHI_054710	18.9237	21.9444	36.3442	40.2331	22.525	32.8149	0.399521	0.944743	0.303192	1.23387	3234
EHI_008140	39.199	32.0022	28.8616	46.3555	40.1533	35.6276	0.291809	0.897438	0.302602	1.23337	2487
EHI_151820	62.1778	78.634	65.2059	111.953	76.3892	66.5674	0.213821	0.846409	0.302491	1.23327	1926
EHI_013340	40.5507	47.5462	19.2411	55.9765	31.3392	45.0033	0.413654	0.94715	0.301991	1.23285	3342
EHI_042200	55.4193	42.0601	43.8269	62.9735	39.1739	70.3177	0.297645	0.900132	0.301918	1.23278	2529
EHI_025330	117.597	119.78	103.688	164.431	117.522	137.823	0.10681	0.716381	0.301898	1.23277	1141
EHI_186920	301.427	316.365	287.547	387.462	389.781	339.4	0.0463886	0.533163	0.30181	1.23269	665
EHI_167720	36.4956	40.2314	32.0685	43.7316	42.112	48.7536	0.221039	0.846409	0.301526	1.23245	1991
EHI_169690	10.8135	8.22914	9.62054	17.4926	5.87609	11.2508	0.55229	0.982629	0.301288	1.23224	4298
EHI_134770	60.8261	58.5184	74.8264	85.714	78.3479	75.0055	0.159386	0.791277	0.300974	1.23198	1539
EHI_001930	114.894	113.379	109.033	126.822	129.274	159.387	0.0938308	0.691037	0.300755	1.23179	1038
EHI_166440	271.69	246.874	243.72	327.112	321.226	288.771	0.045932	0.533163	0.300579	1.23164	657
EHI_070720	3117	4777.47	3359.7	4746.63	4270.94	4843.48	0.113684	0.730271	0.300141	1.23126	1186
EHI_027590	24.3304	25.6018	19.2411	28.8629	25.4631	30.9398	0.33176	0.918226	0.300129	1.23125	2759
EHI_194580	171.665	208.472	151.791	258.017	189.014	209.078	0.0989401	0.698718	0.3001	1.23123	1083
EHI_021550	1.35169	0	1.06895	1.74926	0.979349	0	1	1	0.2998	1.23097	7396
EHI_096280	116.245	66.7475	104.757	173.177	86.1827	91.8818	0.308121	0.906612	0.299392	1.23063	2600
EHI_100430	104.08	157.268	116.515	163.556	136.129	168.762	0.121799	0.743421	0.299197	1.23046	1254
EHI_001420	12054.4	12548.5	13356.5	14885.4	17310	14512.6	0.0614573	0.600968	0.299171	1.23044	782
EHI_064530	224.381	305.393	249.065	342.856	293.805	325.336	0.06557	0.609142	0.299155	1.23042	823
EHI_110830	123.004	235.902	194.549	244.897	197.828	242.83	0.154496	0.781645	0.298771	1.2301	1512
EHI_012240	1680.15	1955.79	1827.9	2298.53	2201.58	2222.98	0.0581556	0.583385	0.298728	1.23006	763
EHI_019100	120.3	136.238	107.964	177.55	136.129	135.01	0.113768	0.730271	0.298248	1.22965	1189
EHI_104890	39.199	64.9188	30.9995	57.7257	64.637	45.9409	0.308994	0.906612	0.298207	1.22962	2608
EHI_075660	462.278	299.907	297.168	451.31	444.624	401.28	0.114008	0.730271	0.298127	1.22955	1193
EHI_096840	70.2879	125.266	118.653	139.067	132.212	119.071	0.157278	0.787443	0.297473	1.22899	1526
EHI_037170	40.5507	47.5462	44.8958	60.3496	63.6577	40.3155	0.240898	0.861951	0.296965	1.22856	2139
EHI_151330	64.8811	94.178	84.4469	84.8393	129.274	88.1315	0.188628	0.816077	0.296648	1.22829	1767
EHI_194060	59.4744	136.238	114.377	140.816	126.336	118.134	0.218851	0.846409	0.296635	1.22828	1972
EHI_073380	194.643	188.356	161.411	230.903	249.734	187.514	0.0834402	0.668745	0.296618	1.22826	955
EHI_135160	114.894	79.5484	74.8264	135.568	96.9555	94.6945	0.208444	0.840586	0.296403	1.22808	1898
EHI_181540	197.347	207.557	211.652	239.649	272.259	246.581	0.0496759	0.546292	0.296274	1.22797	696
EHI_110950	318.999	289.849	277.927	364.722	383.905	338.462	0.051532	0.553192	0.295914	1.22766	713
EHI_073400	236.546	270.647	260.823	286.005	311.433	347.838	0.0534447	0.559863	0.295808	1.22757	730
EHI_192060	105.432	125.266	98.3433	139.067	139.067	127.509	0.0948266	0.692541	0.295572	1.22737	1047
EHI_013210	118.949	100.578	92.9985	134.693	130.253	116.259	0.111762	0.729262	0.29467	1.2266	1173
EHI_122810	51.3642	48.4605	32.0685	52.4779	41.1326	67.505	0.309794	0.907448	0.294404	1.22638	2613
EHI_050750	206.809	210.3	196.687	260.64	226.23	265.332	0.0571045	0.58122	0.293756	1.22583	752
EHI_029350	97.3217	180.127	167.825	204.664	164.531	180.951	0.163972	0.791277	0.293734	1.22581	1581
EHI_201210	254.118	289.849	273.651	349.853	323.185	330.962	0.0457657	0.533163	0.293452	1.22557	656
EHI_070790	500.125	459.003	402.994	606.995	494.571	565.354	0.0756263	0.640371	0.293147	1.22531	903
EHI_024370	125.707	134.409	119.722	148.687	174.324	143.448	0.0870367	0.671887	0.292779	1.225	988
EHI_184480	10747.3	10033.2	12239.5	13573.4	13689.3	13181.3	0.064618	0.608347	0.292605	1.22485	813
EHI_146780	27.0338	8.22914	20.31	13.9941	22.525	30.0022	0.546315	0.982629	0.29216	1.22447	4247
EHI_049540	41.9024	37.4883	28.8616	44.6062	43.0913	44.0657	0.26388	0.882128	0.292115	1.22443	2289
EHI_069060	3873.94	4153.89	4714.06	5173.45	5274.77	5153.82	0.0679838	0.616563	0.292011	1.22435	841
EHI_109900	240.601	275.219	342.063	375.217	330.04	346.901	0.0793558	0.654514	0.291832	1.22419	928
EHI_066760	1250.31	1653.14	1545.7	1896.2	1745.2	1807.63	0.0820311	0.664474	0.291518	1.22393	944
EHI_090430	779.925	1093.56	826.297	1311.07	1131.15	864.439	0.138559	0.76995	0.291313	1.22375	1368
EHI_200220	397.397	357.511	327.098	423.322	421.12	477.223	0.0604012	0.594995	0.290755	1.22328	777
EHI_081660	446.058	463.575	565.474	657.723	586.63	560.666	0.0816808	0.664474	0.290609	1.22316	940
EHI_094110	40.5507	40.2314	41.689	47.2301	59.7403	43.1282	0.250561	0.87081	0.28999	1.22263	2202
EHI_140990	67.5845	71.3192	75.8953	83.9647	99.8935	79.6934	0.151054	0.77889	0.289962	1.22261	1482
EHI_175600	1.35169	0	1.06895	2.6239	0	0	1	1	0.289777	1.22245	7353
EHI_092590	51.3642	62.1757	69.4816	64.7228	75.4098	85.3188	0.192711	0.822286	0.28933	1.22207	1793
EHI_131900	58.1227	53.0323	70.5506	75.2184	67.575	78.7558	0.182592	0.809874	0.288974	1.22177	1725
EHI_040630	62.1778	112.465	45.9648	86.5886	89.1207	96.5696	0.300989	0.901321	0.288928	1.22173	2554
EHI_023170	98.6734	93.2636	94.0675	104.956	119.481	124.697	0.113928	0.730271	0.288563	1.22142	1192
EHI_201720	275.745	419.686	357.029	375.217	491.633	423.781	0.110102	0.722745	0.28847	1.22134	1166
EHI_030710	179.775	113.379	159.273	181.923	194.89	171.575	0.139306	0.76995	0.288126	1.22105	1378
EHI_184810	2.70338	4.57175	4.27579	12.2449	0	1.87514	0.895488	1	0.288	1.22095	6658
EHI_148690	194.643	222.187	260.823	264.139	293.805	271.895	0.0736487	0.635521	0.2878	1.22078	887
EHI_134730	75.6947	110.636	86.5848	111.953	118.501	105.945	0.143327	0.770923	0.286882	1.22	1423
EHI_142130	25.6821	10.9722	13.8963	14.8687	25.4631	19.689	0.53851	0.982629	0.28669	1.21984	4189
EHI_155260	37.8473	25.6018	43.8269	50.7287	40.1533	38.4403	0.350594	0.929492	0.286042	1.21929	2887
EHI_128330	31.0889	12.8009	23.5169	19.2419	27.4218	33.7525	0.483774	0.968413	0.285398	1.21875	3818
EHI_118790	71.6396	64.0044	66.2748	83.9647	89.1207	72.1928	0.172344	0.79954	0.285354	1.21871	1647
EHI_125160	89.2116	101.493	98.3433	118.95	120.46	114.383	0.101028	0.702968	0.285315	1.21868	1100
EHI_019180	43.2541	57.604	50.2406	55.9765	63.6577	66.5674	0.202892	0.83472	0.284546	1.21803	1859
EHI_152190	259.525	232.245	243.72	296.5	270.3	327.212	0.0653079	0.609142	0.284541	1.21802	819
EHI_045260	54.0676	49.3749	52.3785	67.3467	61.699	60.0044	0.188155	0.816077	0.284513	1.218	1761
EHI_018030	2.70338	0	0	1.74926	0.979349	0	1	1	0.284432	1.21793	7396
EHI_016140	86.5082	96.0067	118.653	104.081	134.171	130.322	0.144566	0.772632	0.284203	1.21774	1429
EHI_095320	8.11014	7.31479	12.8274	6.12243	6.85544	21.5641	0.667203	0.99492	0.284201	1.21774	5126
EHI_168080	47.3092	55.7753	55.5853	70.8452	48.9674	74.068	0.247	0.867076	0.284159	1.2177	2178
EHI_197480	28938.3	26406.4	28284.4	34045.1	34056.8	33731.9	0.0691275	0.617649	0.284156	1.2177	856
EHI_188070	228.436	158.182	144.308	209.037	210.56	222.204	0.138584	0.76995	0.283585	1.21722	1369
EHI_158330	78.398	59.4327	30.9995	78.7169	68.5544	56.2541	0.364867	0.930992	0.282868	1.21661	2999
EHI_053070	87.8599	79.5484	52.3785	89.2125	81.2859	95.632	0.225153	0.849765	0.282746	1.21651	2028
EHI_108660	198.698	160.011	158.204	211.661	205.663	208.14	0.0837966	0.670198	0.282602	1.21639	957
EHI_135770	106.784	77.7197	101.55	114.577	108.708	121.884	0.155097	0.783571	0.282547	1.21634	1515
EHI_009500	539.324	537.637	685.196	792.417	653.225	696.614	0.101357	0.703631	0.281712	1.21564	1102
EHI_027540	131.114	158.182	105.826	179.3	162.572	139.698	0.14245	0.76995	0.281512	1.21547	1415
EHI_067990	25.6821	31.0879	29.9306	38.4838	47.0087	20.6265	0.405081	0.944743	0.280746	1.21482	3281
EHI_081740	139.224	81.3771	96.2054	144.314	103.811	132.197	0.231761	0.853522	0.280563	1.21467	2075
EHI_156400	31.0889	52.1179	55.5853	51.6033	60.7196	59.0669	0.266986	0.882727	0.280339	1.21448	2315
EHI_127000	44.6058	106.979	80.1711	96.2095	82.2653	106.883	0.280139	0.887051	0.280162	1.21433	2415
EHI_020260	72.9913	72.2336	74.8264	83.9647	73.4511	109.696	0.195963	0.827211	0.280028	1.21422	1813
EHI_194350	27.0338	31.0879	41.689	55.1018	39.1739	27.1895	0.383968	0.938375	0.279614	1.21387	3129
EHI_048180	33.7923	35.6596	40.62	41.9823	54.8435	37.5028	0.287428	0.895754	0.279501	1.21377	2456
EHI_170360	55.4193	56.6897	43.8269	69.0959	68.5544	51.5663	0.243001	0.864082	0.27936	1.21366	2152
EHI_016340	51.3642	74.9766	51.3095	72.5945	67.575	77.8182	0.213607	0.846409	0.279125	1.21346	1924
EHI_086170	50.0125	41.1457	22.4479	45.4809	55.8229	35.6276	0.388079	0.938375	0.279085	1.21342	3162
EHI_035630	335.219	413.286	380.546	469.677	448.542	454.721	0.0717866	0.631557	0.278961	1.21332	870
EHI_053450	79.7497	53.0323	80.1711	71.7198	89.1207	95.632	0.237049	0.856239	0.278822	1.2132	2119
EHI_118860	150.038	106.065	122.929	136.443	167.469	152.824	0.149484	0.77889	0.278648	1.21306	1465
EHI_019090	217.622	285.277	216.997	255.393	299.681	321.586	0.099959	0.699798	0.278123	1.21262	1093
EHI_083420	246.008	265.161	244.789	313.118	327.102	277.52	0.0670637	0.616563	0.277851	1.21239	831
EHI_044610	314.944	263.333	307.857	346.354	393.698	331.899	0.0786312	0.651346	0.277244	1.21188	924
EHI_105100	106.784	137.152	131.481	144.314	164.531	149.073	0.106031	0.713926	0.276287	1.21107	1136
EHI_171770	50.0125	74.9766	71.6195	107.58	59.7403	72.1928	0.290866	0.897438	0.276207	1.21101	2476
EHI_138930	10.8135	10.9722	4.27579	12.2449	11.7522	7.50055	0.663085	0.99492	0.275888	1.21074	5094
EHI_066740	151.389	180.127	154.998	147.813	225.25	218.454	0.145477	0.775022	0.275679	1.21056	1436
EHI_122860	24.3304	11.8865	23.5169	20.9912	26.4424	23.4392	0.510813	0.974958	0.275644	1.21053	4000
EHI_073580	706.934	917.092	799.573	1004.95	984.245	947.882	0.0949571	0.692541	0.275549	1.21045	1049
EHI_155480	58.1227	85.9488	76.9643	83.0901	84.224	103.133	0.192841	0.822286	0.275139	1.21011	1795
EHI_100250	37.8473	42.9744	32.0685	49.854	44.0707	43.1282	0.274151	0.886525	0.274785	1.20981	2365
EHI_039200	266.283	320.022	321.753	416.325	350.607	333.775	0.0871585	0.671887	0.274747	1.20978	992
EHI_107190	54.0676	32.9166	34.2063	62.9735	33.2978	47.816	0.403835	0.944743	0.274523	1.20959	3267
EHI_150970	72.9913	38.4027	64.1369	52.4779	69.5337	88.1315	0.353972	0.930856	0.274476	1.20955	2909
EHI_146130	5.40676	10.9722	12.8274	8.74632	16.6489	11.2508	0.548635	0.982629	0.274471	1.20955	4267
EHI_035650	558.248	588.841	490.647	672.592	608.175	700.364	0.0896503	0.681971	0.274455	1.20954	1006
EHI_081730	132.466	142.638	89.7917	133.819	140.047	167.825	0.179264	0.805645	0.274274	1.20939	1702
EHI_153260	366.308	408.714	318.547	495.042	424.058	404.092	0.0909244	0.684976	0.274216	1.20934	1016
EHI_199940	11171.7	13903.6	13729.6	15634.1	16043.7	15250.5	0.0912784	0.685618	0.274115	1.20925	1019
EHI_028530	56.771	57.604	55.5853	69.9706	86.1827	49.6912	0.27548	0.886525	0.27374	1.20894	2376
EHI_010110	72.9913	94.178	74.8264	90.9617	101.852	102.195	0.164786	0.791277	0.273663	1.20887	1592
EHI_171440	20.2754	15.5439	21.379	26.239	17.6283	24.3768	0.475886	0.967868	0.273388	1.20864	3763
EHI_118750	23120.7	18835.6	21396.1	24689.1	26892.9	24985.3	0.0925267	0.687233	0.273377	1.20863	1030
EHI_010020	15199.8	15830.1	17565	18430.2	21241.1	19041.1	0.088901	0.680448	0.272829	1.20817	1000
EHI_141980	48.6609	33.8309	44.8958	41.9823	43.0913	67.505	0.364114	0.930992	0.272703	1.20807	2988
EHI_134620	129.762	186.527	244.789	258.891	213.498	208.14	0.192555	0.822286	0.272522	1.20792	1792
EHI_183100	347.384	365.74	363.442	424.197	431.893	445.345	0.0597562	0.591687	0.272465	1.20787	773
EHI_103680	293.317	324.594	247.996	311.369	398.595	337.525	0.102074	0.703631	0.272373	1.20779	1108
EHI_163660	54.0676	96.921	98.3433	113.702	92.0588	98.4448	0.227003	0.850867	0.271184	1.2068	2041
EHI_111080	225.732	275.219	234.1	278.133	266.383	345.025	0.100115	0.699798	0.271144	1.20676	1095
EHI_199970	3548.19	3734.2	3623.73	4511.35	4279.75	4367.2	0.0812546	0.664474	0.270761	1.20644	935
EHI_188900	336.571	276.133	301.443	383.964	383.905	331.899	0.0864269	0.671887	0.270516	1.20624	982
EHI_152830	25.6821	33.8309	33.1374	41.1077	34.2772	37.5028	0.333015	0.918226	0.270465	1.2062	2775
EHI_149000	10617.5	8463.22	11233.6	12306.9	11888.3	12365.6	0.106778	0.716381	0.270394	1.20614	1140
EHI_053610	177.071	152.696	178.514	193.294	224.271	194.077	0.0964384	0.693826	0.270012	1.20582	1062
EHI_140560	221.677	288.02	188.135	282.506	288.908	272.833	0.122877	0.747759	0.269919	1.20574	1256
EHI_169300	109.487	209.386	138.963	222.157	193.911	139.698	0.248996	0.869373	0.269868	1.2057	2191
EHI_087430	1.35169	10.9722	6.41369	9.62095	9.79349	4.68785	0.634883	0.99492	0.269696	1.20555	4865
EHI_097910	206.809	174.641	226.617	230.028	239.94	261.582	0.0990474	0.698718	0.269665	1.20553	1085
EHI_087320	217.622	216.701	206.307	275.509	221.333	274.708	0.089891	0.681971	0.269575	1.20545	1008
EHI_035680	1.35169	10.9722	1.06895	3.49853	12.7315	0.937569	0.834293	1	0.26894	1.20492	6296
EHI_165270	758.298	1165.8	777.125	1200.87	973.472	1083.83	0.164483	0.791277	0.268827	1.20483	1588
EHI_035250	202.754	181.956	205.238	256.267	247.775	205.328	0.0974796	0.695178	0.268788	1.2048	1072
EHI_001850	0	3.6574	1.06895	2.6239	1.9587	1.87514	1	1	0.268468	1.20453	7396
EHI_017590	78.398	95.0923	68.4127	119.825	104.79	67.505	0.263702	0.882128	0.268153	1.20427	2288
EHI_062830	60.8261	127.095	73.7574	112.828	108.708	97.5072	0.278031	0.887051	0.267884	1.20404	2397
EHI_072120	133.817	219.444	154.998	244.022	177.262	194.077	0.184881	0.812331	0.267572	1.20378	1742
EHI_167100	45.9575	74.0623	61.999	93.5856	68.5544	59.0669	0.272909	0.885727	0.267496	1.20372	2358
EHI_040330	37.8473	52.1179	30.9995	43.7316	55.8229	47.816	0.323861	0.918226	0.267239	1.2035	2696
EHI_004850	281.152	300.821	205.238	318.366	324.164	304.71	0.116553	0.732426	0.266463	1.20285	1218
EHI_111430	18.9237	17.3726	19.2411	27.9882	19.587	18.7514	0.463571	0.963166	0.266334	1.20275	3683
EHI_131500	852.917	804.627	815.608	986.585	1009.71	976.947	0.0867635	0.671887	0.266067	1.20252	987
EHI_174210	36.4956	81.3771	54.5164	65.5974	61.699	83.4437	0.322777	0.918226	0.266024	1.20249	2687
EHI_078420	43.2541	21.9444	20.31	28.8629	31.3392	40.3155	0.480799	0.968413	0.265777	1.20228	3795
EHI_141910	97.3217	58.5184	144.308	124.198	130.253	105.008	0.333245	0.918226	0.265237	1.20183	2776
EHI_132890	2.70338	5.4861	2.1379	5.24779	4.89674	2.81271	0.707122	1	0.26491	1.20156	5401
EHI_194230	52.7159	47.5462	32.0685	44.6062	52.8848	60.942	0.330983	0.918226	0.264799	1.20147	2751
EHI_140250	95.97	174.641	122.929	164.431	148.861	164.075	0.197346	0.827886	0.264729	1.20141	1824
EHI_045510	154.093	219.444	183.859	224.78	242.878	206.265	0.12031	0.738993	0.264696	1.20138	1246
EHI_112030	97.3217	71.3192	82.309	96.2095	91.0794	111.571	0.210496	0.843087	0.264674	1.20136	1911
EHI_025840	64.8811	39.317	56.6543	62.0989	74.4305	54.379	0.329822	0.918226	0.26423	1.20099	2741
EHI_182750	264.931	290.763	231.962	322.739	300.66	323.461	0.0852723	0.671887	0.264216	1.20098	968
EHI_148390	51.3642	85.0345	75.8953	101.457	80.3066	75.9431	0.248817	0.869373	0.264097	1.20088	2190
EHI_184250	63.5294	66.7475	52.3785	80.4662	66.5957	72.1928	0.2156	0.846409	0.264014	1.20082	1944
EHI_048650	66.2328	64.0044	80.1711	77.8423	77.3685	97.5072	0.21831	0.846409	0.263692	1.20055	1967
EHI_139360	10.8135	9.14349	3.20685	14.8687	3.91739	8.43812	0.755171	1	0.263436	1.20033	5723
EHI_017710	48.6609	78.634	43.8269	77.8423	75.4098	54.379	0.325844	0.918226	0.263407	1.20031	2707
EHI_151970	13.5169	24.6874	11.7584	17.4926	24.4837	19.689	0.480269	0.968413	0.263385	1.20029	3792
EHI_098010	232.491	271.562	206.307	299.999	263.445	290.646	0.101582	0.703631	0.263276	1.2002	1104
EHI_012250	886.709	886.004	904.33	1088.92	1094.91	1028.51	0.0866607	0.671887	0.262934	1.19992	984
EHI_023420	36.4956	50.2892	55.5853	55.9765	58.7609	58.1293	0.26681	0.882727	0.262639	1.19967	2311
EHI_196920	24946.8	24381.1	26894.7	30885.9	31000.3	29555.9	0.0937993	0.691037	0.262639	1.19967	1037
EHI_087630	66.2328	97.8354	69.4816	93.5856	90.1001	99.3823	0.206265	0.838986	0.26247	1.19953	1881
EHI_051450	24.3304	18.287	22.4479	24.4897	31.3392	21.5641	0.425102	0.951576	0.262282	1.19937	3417
EHI_105770	232.491	268.819	211.652	272.011	322.206	262.519	0.10698	0.716381	0.26137	1.19862	1143
EHI_168280	78.398	76.8053	58.7922	95.3349	97.9349	62.8171	0.271377	0.884361	0.261038	1.19834	2347
EHI_154170	2.70338	8.22914	7.48264	10.4956	6.85544	5.62541	0.694276	1	0.260556	1.19794	5301
EHI_002350	140.576	173.726	151.791	178.425	180.2	202.515	0.109017	0.72144	0.260548	1.19793	1156
EHI_152710	305.482	356.596	256.548	455.683	311.433	333.775	0.165688	0.791277	0.260535	1.19792	1602
EHI_092330	74.343	84.1201	86.5848	91.8364	106.749	96.5696	0.178424	0.805332	0.260493	1.19789	1695
EHI_098590	24.3304	28.3448	28.8616	32.3614	32.3185	33.7525	0.334897	0.919774	0.260416	1.19782	2786
EHI_114340	1300.33	1364.21	1325.5	1479	1570.88	1729.82	0.0979836	0.695178	0.260221	1.19766	1077
EHI_012400	458.223	405.971	415.821	518.657	536.683	475.348	0.0942569	0.691037	0.259703	1.19723	1044
EHI_025230	32.4406	21.03	34.2063	41.1077	39.1739	23.4392	0.472877	0.966144	0.258896	1.19656	3745
EHI_200560	4.05507	10.0578	11.7584	5.24779	3.91739	22.5017	0.75383	1	0.258847	1.19652	5716
EHI_146150	283.855	349.281	299.306	397.083	348.648	372.215	0.0989991	0.698718	0.258501	1.19624	1084
EHI_194380	52.7159	91.4349	87.6538	100.583	90.1001	90.0066	0.242263	0.862856	0.258354	1.19611	2149
EHI_169100	1048.91	804.627	942.812	1112.53	1107.64	1120.4	0.115745	0.73146	0.25803	1.19584	1209
EHI_151810	16642	14721	15039	18419.8	18710.5	18345.4	0.0979917	0.695178	0.257713	1.19558	1078
EHI_049560	173.016	157.268	174.239	218.658	200.766	181.888	0.114172	0.730271	0.256564	1.19463	1196
EHI_153750	325.757	252.36	307.857	333.235	380.967	341.275	0.113463	0.730271	0.256427	1.19452	1184
EHI_152400	127.059	170.069	184.928	182.798	198.808	197.827	0.139133	0.76995	0.256266	1.19438	1376
EHI_003920	66.2328	98.7497	80.1711	113.702	99.8935	81.5685	0.230854	0.853192	0.255121	1.19344	2071
EHI_102930	56.771	49.3749	41.689	55.1018	49.9468	70.3177	0.308552	0.906612	0.254754	1.19313	2604
EHI_194340	58.1227	68.5762	45.9648	71.7198	71.4924	63.7547	0.27104	0.884361	0.254714	1.1931	2342
EHI_124590	29.7372	26.5161	44.8958	53.3526	28.4011	38.4403	0.456377	0.961533	0.254696	1.19308	3625
EHI_105190	131.114	107.893	145.377	150.437	152.778	153.761	0.155974	0.785413	0.254516	1.19294	1520
EHI_168240	39638.3	36244.8	37732.8	44924.6	47373	43221	0.109381	0.72144	0.254338	1.19279	1159
EHI_051410	36.4956	41.1457	52.3785	53.3526	52.8848	49.6912	0.282698	0.890222	0.253991	1.1925	2430
EHI_035150	212.215	306.307	262.961	309.62	292.825	333.775	0.125104	0.751313	0.253727	1.19228	1274
EHI_165100	60.8261	63.0901	60.9301	82.2154	77.3685	60.942	0.248498	0.869132	0.253709	1.19227	2187
EHI_109690	235.194	288.02	231.962	302.623	251.693	347.838	0.138266	0.76995	0.253404	1.19202	1366
EHI_124820	94.6183	69.4905	69.4816	100.583	77.3685	97.5072	0.268456	0.88301	0.252985	1.19167	2327
EHI_193370	106.784	105.15	86.5848	128.571	93.0381	133.135	0.218154	0.846409	0.252378	1.19117	1966
EHI_079930	20.2754	16.4583	18.1721	26.239	20.5663	17.8138	0.499537	0.974958	0.252323	1.19112	3916
EHI_167310	11846.2	15900.5	13300.9	16319.8	16141.6	16419.6	0.131088	0.76109	0.251862	1.19074	1317
EHI_130910	108.135	74.0623	59.8611	93.5856	91.0794	100.32	0.302622	0.901321	0.251366	1.19033	2566
EHI_103530	39.199	53.0323	53.4474	59.475	52.8848	62.8171	0.268008	0.88301	0.251292	1.19027	2322
EHI_159830	128.411	130.752	120.791	145.189	149.84	157.512	0.126295	0.751682	0.251277	1.19026	1286
EHI_013950	244.656	238.645	286.478	334.11	294.784	286.896	0.108046	0.719119	0.25103	1.19006	1150
EHI_022850	47.3092	91.4349	61.999	90.9617	61.699	89.0691	0.326417	0.918226	0.250981	1.19002	2713
EHI_110360	420.376	390.427	419.028	502.914	491.633	467.847	0.0974123	0.695178	0.250933	1.18998	1071
EHI_107300	59.4744	32.9166	57.7232	61.2243	77.3685	38.4403	0.447371	0.95928	0.25072	1.1898	3565
EHI_012220	29.7372	45.7175	39.5511	43.7316	57.7816	37.5028	0.355861	0.930992	0.250688	1.18977	2924
EHI_100450	162.203	106.979	96.2054	147.813	145.923	136.885	0.244029	0.86432	0.250665	1.18976	2161
EHI_092370	1692.32	1360.55	1542.49	1893.58	1822.57	1747.63	0.123704	0.748869	0.250509	1.18963	1264
EHI_024690	748.836	691.248	739.712	1007.58	770.747	812.872	0.137473	0.76995	0.250325	1.18947	1359
EHI_014810	27.0338	42.9744	20.31	29.7375	30.3598	48.7536	0.466448	0.963356	0.250192	1.18937	3705
EHI_125870	233.842	256.932	242.651	283.381	280.094	310.335	0.0923218	0.687233	0.250143	1.18933	1028
EHI_152300	44.6058	76.8053	63.068	75.2184	70.5131	76.8807	0.263402	0.882128	0.249849	1.18908	2285
EHI_154700	12.1652	8.22914	6.41369	15.7434	4.89674	10.3133	0.680902	0.99763	0.249839	1.18907	5224
EHI_095830	587.985	659.246	683.058	704.079	767.809	825.061	0.121095	0.740896	0.24958	1.18886	1251
EHI_115510	31.0889	42.9744	40.62	51.6033	33.2978	52.5039	0.371454	0.933257	0.249216	1.18856	3044
EHI_158290	116.245	114.294	134.687	163.556	134.171	135.948	0.164104	0.791277	0.2491	1.18847	1583
EHI_004600	5201.3	4873.48	4984.51	5159.46	6411.79	6325.78	0.128934	0.756195	0.249085	1.18845	1304
EHI_136980	367.66	353.853	349.546	441.689	405.45	424.719	0.0898389	0.681971	0.248979	1.18837	1007
EHI_129000	100.025	59.4327	94.0675	85.714	117.522	95.632	0.299647	0.901305	0.248954	1.18835	2543
EHI_124610	816.421	864.974	745.057	924.486	1040.07	919.755	0.122874	0.747759	0.248924	1.18832	1255
EHI_091110	27.0338	15.5439	26.7237	26.239	31.3392	23.4392	0.49923	0.974958	0.248404	1.18789	3914
EHI_068480	1016.47	837.544	1211.12	1342.56	1180.11	1116.64	0.165573	0.791277	0.248373	1.18787	1600
EHI_109840	168.961	142.638	116.515	192.419	137.109	176.263	0.215156	0.846409	0.248089	1.18763	1940
EHI_040580	32.4406	28.3448	27.7927	37.6092	26.4424	40.3155	0.418974	0.948892	0.248068	1.18762	3378
EHI_170140	20.2754	17.3726	13.8963	14.8687	32.3185	14.0635	0.563053	0.985128	0.24806	1.18761	4372
EHI_161070	6838.2	7704.31	6474.62	8512.8	8149.16	8297.49	0.116178	0.731876	0.247938	1.18751	1215
EHI_009380	309.537	281.62	287.547	362.972	345.71	332.837	0.0954198	0.692889	0.247634	1.18726	1054
EHI_142710	16.2203	9.14349	8.55159	6.99706	15.6696	16.8762	0.654454	0.99492	0.247536	1.18718	5023
EHI_086260	100.025	107.893	66.2748	118.075	88.1414	119.071	0.273338	0.886495	0.247302	1.18699	2360
EHI_129350	83.8048	110.636	109.033	103.207	140.047	120.009	0.20236	0.83472	0.246921	1.18667	1853
EHI_166370	71.6396	43.8888	56.6543	49.854	86.1827	66.5674	0.378053	0.937274	0.246659	1.18646	3085
EHI_112790	467.685	384.027	478.889	494.167	539.621	542.853	0.125102	0.751313	0.246581	1.18639	1273
EHI_073180	237.897	229.502	281.133	311.369	272.259	303.772	0.118417	0.737484	0.246098	1.186	1229
EHI_015320	608.261	442.545	741.85	704.954	695.337	723.803	0.202445	0.83472	0.246092	1.18599	1855
EHI_151200	337.923	404.142	343.132	424.197	418.182	447.22	0.102961	0.703631	0.246015	1.18593	1120
EHI_165310	300.075	386.77	298.237	431.194	373.132	366.59	0.133954	0.768807	0.245975	1.18589	1333
EHI_076860	183.83	183.784	140.032	210.786	186.076	204.39	0.14913	0.77889	0.245937	1.18586	1463
EHI_044920	181.127	200.242	163.549	195.918	209.581	241.893	0.137789	0.76995	0.245566	1.18556	1362
EHI_009260	1590.94	1322.15	1451.63	1741.39	1711.9	1718.56	0.123096	0.747759	0.245523	1.18552	1260
EHI_174150	81.1014	56.6897	96.2054	97.9588	98.9142	78.7558	0.30094	0.901321	0.244864	1.18498	2553
EHI_009420	1.35169	4.57175	2.1379	4.37316	4.89674	0.937569	0.833419	1	0.24466	1.18481	6285
EHI_135480	124.356	95.0923	106.895	106.705	144.944	133.135	0.222101	0.846409	0.244333	1.18455	2003
EHI_092390	271.69	355.682	358.098	401.456	392.719	376.903	0.12494	0.751313	0.244308	1.18452	1270
EHI_083270	114.894	67.6618	95.1364	132.944	88.1414	104.07	0.315884	0.913747	0.244105	1.18436	2646
EHI_197380	32.4406	26.5161	17.1032	31.4868	36.2359	21.5641	0.517727	0.977769	0.243528	1.18388	4051
EHI_058540	191.94	177.384	180.652	207.288	230.147	212.828	0.118171	0.737148	0.243411	1.18379	1227
EHI_169370	93.2666	92.3493	99.4122	93.5856	127.315	117.196	0.207055	0.840297	0.243173	1.18359	1886
EHI_174990	121.652	145.382	128.274	174.926	158.654	135.948	0.162837	0.791277	0.243157	1.18358	1570
EHI_011230	4.05507	9.14349	11.7584	13.1195	7.83479	9.37569	0.65566	0.99492	0.242996	1.18345	5029
EHI_001890	78.398	21.9444	40.62	45.4809	48.9674	69.3801	0.552614	0.982629	0.242842	1.18332	4303
EHI_060860	1650.41	1313.01	1608.77	1835.85	1813.75	1757	0.139542	0.76995	0.242566	1.18309	1382
EHI_019130	29.7372	9.14349	19.2411	27.1136	21.5457	17.8138	0.640938	0.99492	0.242283	1.18286	4919
EHI_012310	132.466	118.865	126.136	137.317	147.882	160.324	0.153793	0.781405	0.242283	1.18286	1503
EHI_188100	174.368	211.215	193.48	232.652	209.581	244.706	0.126681	0.752378	0.241456	1.18218	1288
EHI_137260	14.8686	14.6296	16.0342	15.7434	15.6696	22.5017	0.555855	0.984207	0.241418	1.18215	4321
EHI_161980	559.6	475.462	565.474	648.102	649.308	592.544	0.135356	0.76995	0.241244	1.18201	1340
EHI_065820	412.266	376.712	411.545	474.925	466.17	476.285	0.111559	0.728561	0.24083	1.18167	1172
EHI_038160	97.3217	137.152	118.653	118.075	155.716	147.198	0.202008	0.83472	0.240767	1.18162	1848
EHI_152290	70.2879	85.0345	123.998	132.069	91.0794	107.82	0.304754	0.902158	0.240312	1.18125	2585
EHI_109000	40.5507	30.1735	50.2406	30.6121	55.8229	56.2541	0.468092	0.964245	0.240152	1.18112	3715
EHI_167070	85.1565	78.634	81.2401	109.329	83.2446	95.632	0.238593	0.858171	0.240074	1.18105	2128
EHI_000920	29.7372	25.6018	22.4479	23.6151	32.3185	35.6276	0.446887	0.95928	0.240009	1.181	3563
EHI_073410	106.784	101.493	97.2743	97.0842	145.923	118.134	0.228263	0.851427	0.239817	1.18084	2052
EHI_095160	54.0676	20.1157	50.2406	40.2331	56.8022	47.816	0.513133	0.974958	0.239693	1.18074	4023
EHI_065340	235.194	210.3	265.099	273.76	234.064	330.024	0.172765	0.79954	0.239478	1.18057	1653
EHI_197200	117.597	134.409	118.653	122.449	159.634	157.512	0.18521	0.812377	0.239418	1.18052	1745
EHI_119260	82.4531	67.6618	84.4469	94.4603	85.2033	95.632	0.242079	0.862856	0.239329	1.18044	2147
EHI_159790	198.698	201.157	147.515	225.655	191.952	227.829	0.171138	0.799432	0.239257	1.18038	1638
EHI_129880	47.3092	38.4027	49.1716	62.9735	49.9468	45.0033	0.347457	0.927515	0.239149	1.1803	2866
EHI_193430	197.347	225.844	153.929	193.294	242.878	246.581	0.191155	0.819207	0.239099	1.18026	1786
EHI_073990	71.6396	93.2636	66.2748	90.9617	89.1207	94.6945	0.246301	0.867057	0.238653	1.17989	2174
EHI_015970	14.8686	13.7152	17.1032	19.2419	17.6283	16.8762	0.545936	0.982629	0.238577	1.17983	4244
EHI_137050	124.356	133.495	133.619	134.693	166.489	162.199	0.163142	0.791277	0.238534	1.17979	1577
EHI_180780	632.591	640.959	743.988	872.008	775.644	732.241	0.14738	0.776116	0.238155	1.17948	1450
EHI_186880	218.974	213.958	208.445	282.506	225.25	247.518	0.133994	0.768807	0.237855	1.17924	1334
EHI_137930	323.054	272.476	215.928	322.739	340.813	290.646	0.172697	0.79954	0.237793	1.17919	1652
EHI_156430	162.203	167.326	163.549	188.046	206.643	187.514	0.124313	0.750402	0.237775	1.17917	1267
EHI_012540	91.9149	91.4349	51.3095	100.583	92.0588	83.4437	0.319162	0.915727	0.237721	1.17913	2667
EHI_053840	67.5845	51.2036	58.7922	62.0989	75.4098	70.3177	0.291491	0.897438	0.237581	1.17901	2481
EHI_055720	104.08	120.694	125.067	136.443	142.006	135.948	0.161413	0.791277	0.237394	1.17886	1555
EHI_045410	54.0676	79.5484	76.9643	95.3349	78.3479	76.8807	0.272379	0.88526	0.237319	1.1788	2355
EHI_023630	68.9362	76.8053	54.5164	79.5915	78.3479	78.7558	0.26178	0.881824	0.237256	1.17875	2271
EHI_178490	566.358	690.334	603.956	746.936	690.441	757.556	0.141813	0.76995	0.236745	1.17833	1406
EHI_148130	373.067	353.853	311.064	449.561	376.07	395.654	0.130947	0.76109	0.236611	1.17822	1316
EHI_051000	36.4956	60.3471	39.5511	48.9794	65.6164	48.7536	0.36168	0.930992	0.236595	1.17821	2966
EHI_165300	123.004	179.212	140.032	182.798	171.386	170.638	0.180219	0.807611	0.236467	1.1781	1708
EHI_146540	114.894	145.382	130.412	153.935	138.088	170.638	0.17036	0.799107	0.236384	1.17804	1630
EHI_198550	881.302	1106.36	1019.78	1336.44	1054.76	1153.21	0.163021	0.791277	0.236079	1.17779	1573
EHI_070770	85.1565	76.8053	103.688	114.577	102.832	94.6945	0.236818	0.855809	0.235683	1.17746	2118
EHI_012570	1624.73	1543.42	1466.6	1746.64	1862.72	1847.01	0.131846	0.76109	0.235638	1.17743	1325
EHI_118890	13.5169	10.9722	16.0342	15.7434	22.525	9.37569	0.62412	0.99492	0.235635	1.17743	4792
EHI_045570	81.1014	138.981	80.1711	124.198	117.522	115.321	0.283674	0.891358	0.235548	1.17735	2435
EHI_152450	514.994	547.695	530.198	714.575	570.96	589.731	0.150722	0.77889	0.235295	1.17715	1481
EHI_152640	18.9237	22.8587	16.0342	24.4897	23.5044	20.6265	0.510362	0.974958	0.235267	1.17712	3989
EHI_121830	204.105	170.983	167.825	265.014	172.365	198.765	0.220117	0.846409	0.235073	1.17697	1984
EHI_004830	291.965	251.446	296.099	334.11	336.896	315.023	0.119642	0.738526	0.234916	1.17684	1239
EHI_096260	877.247	707.706	752.54	997.955	848.116	901.004	0.162055	0.791277	0.234647	1.17662	1562
EHI_178990	117.597	129.838	162.48	174.926	154.737	153.761	0.190244	0.818139	0.234519	1.17651	1778
EHI_025290	644.756	647.359	641.369	797.665	769.768	706.927	0.134468	0.769799	0.234288	1.17633	1337
EHI_010130	56.771	64.0044	47.0337	76.093	55.8229	65.6298	0.32864	0.918226	0.233872	1.17599	2728
EHI_114140	1447.66	1410.84	1697.49	1855.97	1770.66	1730.75	0.146993	0.776116	0.233752	1.17589	1448
EHI_096800	205.457	207.557	185.997	250.145	242.878	210.953	0.138119	0.76995	0.233312	1.17553	1364
EHI_182460	2.70338	0	3.20685	0	6.85544	0	1	1	0.233213	1.17545	7396
EHI_017730	48.6609	46.6318	43.8269	59.475	55.8229	47.816	0.327826	0.918226	0.233213	1.17545	2723
EHI_149840	37.8473	35.6596	30.9995	34.9853	31.3392	56.2541	0.45851	0.961533	0.233187	1.17543	3645
EHI_135750	25.6821	62.1757	43.8269	48.9794	52.8848	56.2541	0.409204	0.947145	0.233183	1.17543	3306
EHI_166910	39.199	64.9188	67.3437	81.3408	74.4305	47.816	0.391395	0.938772	0.232835	1.17514	3191
EHI_193420	25.6821	9.14349	12.8274	17.4926	22.525	14.0635	0.624766	0.99492	0.232819	1.17513	4797
EHI_130880	125.707	167.326	134.687	185.422	154.737	165.012	0.182988	0.810323	0.232649	1.17499	1728
EHI_086190	160.851	203.9	122.929	207.288	195.87	171.575	0.22965	0.852033	0.232582	1.17494	2063
EHI_001840	352.791	324.594	299.306	391.835	406.43	347.838	0.135014	0.76995	0.232567	1.17492	1338
EHI_148380	223.029	214.872	199.893	245.772	241.899	260.644	0.123768	0.748869	0.231995	1.17446	1265
EHI_086570	48.6609	39.317	26.7237	43.7316	36.2359	53.4414	0.45436	0.961533	0.231986	1.17445	3614
EHI_001800	286.558	330.994	324.96	408.453	344.731	355.339	0.137441	0.76995	0.23193	1.1744	1358
EHI_125140	20.2754	35.6596	32.0685	27.1136	34.2772	44.0657	0.462744	0.962719	0.231909	1.17439	3679
EHI_124860	102.728	119.78	102.619	109.329	148.861	125.634	0.21722	0.846409	0.231474	1.17403	1957
EHI_197230	104.08	155.439	123.998	162.682	136.129	154.699	0.216291	0.846409	0.231009	1.17366	1948
EHI_059700	12.1652	13.7152	14.9653	13.9941	11.7522	22.5017	0.611912	0.994383	0.230906	1.17357	4699
EHI_155600	158.148	140.81	121.86	153.061	176.283	163.137	0.187472	0.816077	0.230776	1.17347	1753
EHI_135130	22.9787	27.4305	14.9653	21.8658	27.4218	28.1271	0.484448	0.968413	0.230766	1.17346	3823
EHI_032780	174.368	147.21	178.514	167.929	211.539	206.265	0.17976	0.806024	0.230595	1.17332	1707
EHI_094130	8.11014	7.31479	5.34474	5.24779	11.7522	7.50055	0.799159	1	0.230211	1.17301	6043
EHI_012330	1.35169	10.0578	3.20685	6.12243	4.89674	7.50055	0.775572	1	0.230137	1.17295	5880
EHI_026320	21.627	22.8587	37.4132	38.4838	39.1739	18.7514	0.520433	0.977769	0.230133	1.17294	4073
EHI_178530	13.5169	18.287	7.48264	16.618	22.525	7.50055	0.661706	0.99492	0.229898	1.17275	5080
EHI_092130	89.2116	138.981	128.274	139.067	151.799	131.26	0.23121	0.853271	0.229895	1.17275	2074
EHI_006030	1044.86	1136.54	1122.4	1173.76	1414.18	1288.22	0.149532	0.77889	0.229823	1.17269	1466
EHI_163960	6.75845	2.74305	2.1379	6.12243	5.87609	0.937569	0.862413	1	0.229563	1.17248	6467
EHI_147560	168.961	188.356	168.894	206.413	232.106	180.013	0.159188	0.791277	0.229411	1.17236	1537
EHI_096170	416.321	464.489	351.684	511.66	440.707	493.161	0.164243	0.791277	0.229333	1.17229	1585
EHI_069230	151.389	151.782	192.411	212.536	204.684	164.075	0.194946	0.82376	0.229295	1.17226	1810
EHI_169960	86.5082	44.8031	83.378	105.83	81.2859	61.8796	0.44127	0.95824	0.22926	1.17223	3522
EHI_183240	332.516	327.337	287.547	353.351	350.607	405.967	0.142977	0.770123	0.229012	1.17203	1421
EHI_177030	77.0463	114.294	83.378	123.323	101.852	99.3823	0.271115	0.884361	0.228773	1.17184	2343
EHI_010630	101.377	130.752	128.274	163.556	135.15	125.634	0.214908	0.846409	0.228598	1.1717	1937
EHI_045600	44.6058	53.0323	43.8269	64.7228	53.8642	47.816	0.354401	0.930856	0.228227	1.17139	2913
EHI_024520	12.1652	17.3726	11.7584	14.8687	15.6696	18.7514	0.537043	0.982629	0.227914	1.17114	4181
EHI_197870	90.5633	127.095	80.1711	134.693	91.0794	124.697	0.304353	0.902089	0.227878	1.17111	2582
EHI_137770	33.7923	58.5184	41.689	47.2301	64.637	47.816	0.394796	0.94172	0.227337	1.17067	3207
EHI_000580	260.876	244.131	220.203	244.897	328.082	275.645	0.171399	0.799432	0.227216	1.17057	1640
EHI_150550	537.973	510.207	474.613	598.248	546.476	636.609	0.153893	0.781405	0.227173	1.17054	1506
EHI_069220	78.398	80.4627	75.8953	70.8452	94.0175	110.633	0.298171	0.900277	0.227169	1.17054	2535
EHI_014290	70.2879	53.9466	66.2748	67.3467	72.4718	81.5685	0.316758	0.91415	0.226802	1.17024	2651
EHI_152580	197.347	188.356	183.859	226.53	231.126	208.14	0.139358	0.76995	0.226749	1.1702	1380
EHI_064650	82.4531	112.465	61.999	90.0871	106.749	105.945	0.313071	0.910697	0.226646	1.17011	2630
EHI_077240	206.809	262.418	180.652	240.524	273.238	249.393	0.18611	0.815125	0.226407	1.16992	1747
EHI_005890	1024.58	622.672	1122.4	711.951	1364.23	1162.59	0.36961	0.932432	0.226328	1.16985	3034
EHI_167120	39.199	24.6874	24.5858	21.8658	41.1326	39.3779	0.545208	0.982629	0.226008	1.16959	4234
EHI_188810	452.816	520.265	473.544	616.616	508.282	568.167	0.158702	0.790822	0.225801	1.16943	1536
EHI_141060	216.27	241.388	213.79	248.396	275.197	263.457	0.131399	0.76109	0.225644	1.1693	1320
EHI_110290	40.5507	40.2314	38.4821	42.857	48.9674	47.816	0.360409	0.930992	0.225629	1.16929	2955
EHI_095190	195.995	231.33	168.894	232.652	251.693	214.703	0.179179	0.805645	0.225562	1.16923	1701
EHI_044810	11119	14398.3	13497.6	15234.3	15379.7	15006.7	0.168067	0.798501	0.225553	1.16923	1611
EHI_152500	45.9575	47.5462	34.2063	53.3526	50.9261	45.0033	0.383641	0.938375	0.225471	1.16916	3127
EHI_007500	391.99	491.92	485.303	518.657	544.518	540.977	0.15705	0.787443	0.225391	1.16909	1525
EHI_170090	62.1778	96.0067	76.9643	99.7081	88.1414	90.0066	0.268188	0.88301	0.225231	1.16896	2323
EHI_167670	33.7923	25.6018	29.9306	30.6121	41.1326	31.8773	0.442219	0.95824	0.224961	1.16875	3529
EHI_126260	309.537	303.564	335.65	440.815	345.71	321.586	0.181113	0.807657	0.224957	1.16874	1714
EHI_004560	20.2754	21.9444	40.62	30.6121	20.5663	45.9409	0.573553	0.985993	0.22448	1.16836	4451
EHI_017570	173.016	197.499	149.653	211.661	189.014	208.14	0.177457	0.804654	0.224412	1.1683	1688
EHI_054210	198.698	152.696	197.755	213.41	209.581	215.641	0.178364	0.805332	0.224385	1.16828	1693
EHI_180410	1069.19	1128.31	1283.81	1308.45	1439.64	1320.1	0.160667	0.791277	0.224248	1.16817	1550
EHI_187170	64.8811	84.1201	63.068	93.5856	89.1207	66.5674	0.318947	0.915727	0.224168	1.1681	2663
EHI_000770	143.279	144.467	153.929	173.177	171.386	171.575	0.154511	0.781645	0.224015	1.16798	1513
EHI_137680	185.182	104.236	138.963	107.58	207.622	182.826	0.390883	0.938758	0.223978	1.16795	3187
EHI_151620	89.2116	103.321	90.8606	110.204	133.191	89.0691	0.267638	0.88301	0.223777	1.16779	2319
EHI_188980	296.02	288.02	295.03	341.107	342.772	342.213	0.122929	0.747759	0.223583	1.16763	1257
EHI_086390	9.46183	2.74305	5.34474	8.74632	7.83479	2.81271	0.891054	1	0.223564	1.16761	6637
EHI_197270	140.576	178.298	152.86	195.043	183.138	175.325	0.170445	0.799107	0.223518	1.16758	1631
EHI_153800	305.482	276.133	277.927	355.975	343.751	301.897	0.144646	0.772632	0.223252	1.16736	1430
EHI_093870	360.901	493.749	370.925	486.296	462.252	485.661	0.183048	0.810323	0.223164	1.16729	1729
EHI_149020	79.7497	87.7775	115.446	113.702	113.604	104.07	0.262943	0.881931	0.222627	1.16686	2282
EHI_104380	502.829	610.785	474.613	747.811	540.6	565.354	0.225784	0.850049	0.222177	1.16649	2033
EHI_071210	9.46183	5.4861	11.7584	11.3702	9.79349	9.37569	0.732234	1	0.222166	1.16648	5573
EHI_051580	9.46183	7.31479	7.48264	5.24779	11.7522	11.2508	0.72517	1	0.222132	1.16646	5521
EHI_109980	148.686	135.324	125.067	167.929	154.737	152.824	0.18959	0.817531	0.221974	1.16633	1775
EHI_103250	39.199	16.4583	14.9653	26.239	28.4011	25.3144	0.636976	0.99492	0.221848	1.16623	4876
EHI_151650	285.207	294.42	287.547	328.862	340.813	342.213	0.126402	0.751731	0.221648	1.16606	1287
EHI_124440	350.088	313.622	307.857	432.068	352.565	345.963	0.169344	0.798913	0.221643	1.16606	1622
EHI_154690	9.46183	0.914349	30.9995	18.3673	14.6902	15.0011	0.782185	1	0.221608	1.16603	5926
EHI_103630	16.2203	11.8865	17.1032	13.9941	20.5663	17.8138	0.615777	0.994383	0.221571	1.166	4730
EHI_030490	9.46183	2.74305	5.34474	7.87169	9.79349	1.87514	0.89594	1	0.221335	1.16581	6660
EHI_001780	9661.88	8182.51	7845.01	9658.56	10280.2	10002.9	0.171379	0.799432	0.221101	1.16562	1639
EHI_020370	23820.8	26405.5	26250.2	30256.2	30347.1	28539.6	0.159925	0.791277	0.221076	1.1656	1542
EHI_029520	21.627	47.5462	32.0685	39.3584	33.2978	47.816	0.473445	0.966144	0.221021	1.16556	3749
EHI_051940	72.9913	98.7497	65.2059	109.329	72.4718	95.632	0.349892	0.92922	0.220922	1.16548	2881
EHI_134950	86.5082	86.8632	109.033	113.702	112.625	103.133	0.239419	0.858721	0.220765	1.16535	2134
EHI_050720	458.223	397.742	386.959	459.182	504.364	482.848	0.159361	0.791277	0.220704	1.1653	1538
EHI_127300	85.1565	62.1757	67.3437	88.3379	84.224	75.0055	0.330157	0.918226	0.220607	1.16522	2744
EHI_153220	132.466	107.893	134.687	150.437	137.109	147.198	0.216639	0.846409	0.220245	1.16493	1954
EHI_012950	121.652	115.208	90.8606	165.305	94.0175	120.946	0.345464	0.925187	0.220186	1.16488	2858
EHI_082600	450.113	520.265	437.2	559.765	517.096	564.417	0.163428	0.791277	0.220138	1.16485	1580
EHI_143810	10.8135	17.3726	10.6895	6.99706	23.5044	15.9387	0.657072	0.99492	0.219799	1.16457	5046
EHI_024630	143.279	163.669	160.342	181.923	184.118	180.013	0.161631	0.791277	0.219604	1.16441	1558
EHI_110000	2047.81	2144.15	2048.11	2685.12	2330.85	2249.23	0.170225	0.799107	0.219406	1.16425	1629
EHI_173420	29.7372	9.14349	18.1721	8.74632	29.3805	27.1895	0.704557	1	0.219352	1.16421	5383
EHI_085960	4.05507	5.4861	12.8274	2.6239	14.6902	9.37569	0.765441	1	0.219153	1.16405	5800
EHI_052850	570.413	518.436	582.577	566.762	680.647	697.551	0.181047	0.807657	0.219004	1.16393	1713
EHI_040360	289.262	345.624	370.925	376.966	355.504	440.657	0.177709	0.805319	0.218903	1.16385	1689
EHI_171450	110.839	91.4349	99.4122	120.699	133.191	95.632	0.274455	0.886525	0.21862	1.16362	2367
EHI_073330	367.66	423.344	399.787	440.815	466.17	480.973	0.15331	0.781405	0.218612	1.16361	1499
EHI_073360	901.577	853.088	819.883	1018.07	1015.58	961.008	0.161497	0.791277	0.21854	1.16356	1556
EHI_133930	79.7497	64.9188	73.7574	87.4632	89.1207	75.9431	0.306697	0.903946	0.218183	1.16327	2596
EHI_038300	144.631	143.553	145.377	202.04	173.345	128.447	0.263105	0.882086	0.218034	1.16315	2283
EHI_164620	13.5169	25.6018	10.6895	19.2419	19.587	20.6265	0.571254	0.985128	0.217865	1.16301	4435
EHI_126010	189.237	139.895	159.273	174.052	190.973	199.702	0.216781	0.846409	0.217852	1.163	1955
EHI_188250	94.6183	111.551	117.584	118.075	124.377	135.948	0.223388	0.847281	0.217209	1.16248	2018
EHI_095910	5.40676	2.74305	1.06895	3.49853	4.89674	1.87514	1	1	0.216799	1.16215	7396
EHI_158640	250.063	393.17	345.27	421.573	351.586	379.715	0.228127	0.851427	0.216498	1.16191	2049
EHI_110550	112.19	181.041	138.963	211.661	149.84	143.448	0.309726	0.907448	0.216295	1.16175	2611
EHI_019110	16.2203	10.9722	9.62054	8.74632	15.6696	17.8138	0.654033	0.99492	0.216084	1.16158	5019
EHI_049440	18.9237	37.4883	24.5858	37.6092	28.4011	30.0022	0.497168	0.974958	0.215891	1.16142	3902
EHI_180660	97.3217	109.722	100.481	149.562	101.852	105.945	0.283375	0.891182	0.215838	1.16138	2433
EHI_129740	366.308	363.911	304.65	426.821	386.843	387.216	0.162433	0.791277	0.21563	1.16121	1565
EHI_189900	386.583	477.29	396.58	478.424	502.406	485.661	0.171016	0.799432	0.215497	1.1611	1636
EHI_197820	75.6947	96.0067	71.6195	124.198	79.3272	79.6934	0.367138	0.931628	0.215473	1.16108	3015
EHI_124830	375.77	415.115	344.201	424.197	500.447	394.717	0.182629	0.809874	0.215342	1.16098	1726
EHI_141400	343.329	369.397	347.408	410.203	403.492	418.156	0.137596	0.76995	0.215239	1.1609	1360
EHI_179030	91.9149	77.7197	102.619	103.207	108.708	103.133	0.279643	0.887051	0.215235	1.16089	2411
EHI_081120	206.809	160.925	180.652	209.912	205.663	217.516	0.192481	0.822286	0.214738	1.16049	1791
EHI_098530	44.6058	47.5462	50.2406	45.4809	58.7609	61.8796	0.349457	0.92922	0.214715	1.16047	2877
EHI_001280	5.40676	7.31479	14.9653	7.87169	12.7315	12.1884	0.757188	1	0.214336	1.16017	5744
EHI_110710	270.338	247.789	296.099	291.253	334.937	317.836	0.162503	0.791277	0.213959	1.15987	1568
EHI_020610	67.5845	124.351	109.033	127.696	132.212	92.8193	0.35743	0.930992	0.213914	1.15983	2936
EHI_097750	48.6609	47.5462	47.0337	69.9706	39.1739	56.2541	0.440879	0.95824	0.21374	1.15969	3518
EHI_050400	63.5294	50.2892	83.378	67.3467	75.4098	85.3188	0.376572	0.937153	0.213731	1.15968	3075
EHI_044900	174.368	160.011	191.342	174.926	237.982	196.89	0.21961	0.846409	0.213647	1.15962	1976
EHI_027910	29.7372	24.6874	25.6548	23.6151	32.3185	36.5652	0.486699	0.968413	0.213587	1.15957	3844
EHI_026420	567.71	405.971	470.337	547.52	587.609	535.352	0.212583	0.846409	0.213557	1.15954	1922
EHI_019170	263.58	280.705	247.996	269.387	269.321	380.653	0.219973	0.846409	0.213462	1.15947	1981
EHI_122850	573.117	533.066	644.576	704.079	692.399	632.859	0.188498	0.816077	0.213424	1.15944	1765
EHI_163580	1167.86	1225.23	1098.88	1388.04	1289.8	1370.73	0.169875	0.799107	0.213254	1.1593	1626
EHI_120300	97.3217	107.893	83.378	125.072	102.832	106.883	0.264761	0.882727	0.212719	1.15887	2295
EHI_050680	13.5169	5.4861	14.9653	20.1165	6.85544	11.2508	0.743348	1	0.212237	1.15848	5648
EHI_167040	79.7497	81.3771	73.7574	94.4603	101.852	75.9431	0.302714	0.901321	0.211871	1.15819	2567
EHI_006880	118.949	88.6919	91.9296	110.204	125.357	108.758	0.291397	0.897438	0.211749	1.15809	2480
EHI_194220	843.455	1154.82	935.33	1189.5	1039.09	1171.96	0.215903	0.846409	0.211658	1.15802	1946
EHI_148580	310.889	325.508	267.237	390.086	291.846	363.777	0.207	0.840297	0.211279	1.15771	1885
EHI_139050	308.185	364.825	351.684	394.459	399.574	394.717	0.155446	0.784302	0.210907	1.15742	1517
EHI_022950	970.514	952.752	1057.19	1100.29	1209.5	1140.08	0.175891	0.801352	0.210864	1.15738	1680
EHI_124380	87.8599	53.0323	65.2059	72.5945	104.79	59.0669	0.450892	0.959393	0.210722	1.15727	3597
EHI_066750	75.6947	40.2314	43.8269	61.2243	51.9055	68.4425	0.48523	0.968413	0.210523	1.15711	3827
EHI_183230	105.432	122.523	98.3433	118.075	110.666	150.011	0.279	0.887051	0.210358	1.15698	2403
EHI_157120	1001.6	957.324	999.467	1079.3	1212.43	1130.71	0.175284	0.800016	0.210289	1.15692	1677
EHI_129760	74.343	161.84	131.481	157.434	138.088	134.072	0.36033	0.930992	0.210168	1.15682	2953
EHI_148090	121.652	135.324	104.757	151.311	145.923	121.884	0.256221	0.876671	0.209886	1.1566	2237
EHI_138350	217.622	243.217	195.618	263.264	242.878	254.081	0.178448	0.805332	0.209681	1.15643	1696
EHI_199270	72.9913	77.7197	79.1022	76.093	97.9349	92.8193	0.300838	0.901321	0.209503	1.15629	2550
EHI_174170	313.592	314.536	296.099	319.241	363.338	386.278	0.170596	0.799107	0.209184	1.15603	1634
EHI_092480	62.1778	59.4327	54.5164	54.2272	76.3892	73.1304	0.370284	0.933257	0.20871	1.15565	3036
EHI_131660	140.576	193.842	165.687	175.801	199.787	206.265	0.220066	0.846409	0.208515	1.1555	1983
EHI_012530	17.572	30.1735	27.7927	30.6121	21.5457	36.5652	0.545468	0.982629	0.208491	1.15548	4237
EHI_106130	48.6609	45.7175	39.5511	48.9794	51.9055	53.4414	0.398508	0.944464	0.20791	1.15501	3228
EHI_177510	66.2328	69.4905	80.1711	99.7081	82.2653	67.505	0.355072	0.930856	0.207864	1.15498	2916
EHI_130860	35.1439	39.317	65.2059	41.9823	46.0294	74.068	0.511617	0.974958	0.207449	1.15464	4006
EHI_151410	0	2.74305	0	0	1.9587	1.87514	1	1	0.207227	1.15447	7367
EHI_148180	22.9787	32.9166	19.2411	22.7404	39.1739	26.2519	0.555481	0.984179	0.207068	1.15434	4320
EHI_011250	83.8048	89.6062	82.309	106.705	96.9555	91.8818	0.277825	0.887051	0.20701	1.15429	2395
EHI_068430	178.423	233.159	251.203	267.637	265.403	235.33	0.215159	0.846409	0.206982	1.15427	1941
EHI_070700	314.944	257.846	220.203	297.375	302.619	312.211	0.215037	0.846409	0.206965	1.15426	1939
EHI_128200	48.6609	63.0901	69.4816	54.2272	77.3685	79.6934	0.377657	0.937274	0.206826	1.15415	3081
EHI_140580	20.2754	24.6874	26.7237	27.1136	22.525	33.7525	0.491649	0.971719	0.206798	1.15412	3872
EHI_092070	44.6058	75.891	69.4816	58.6004	84.224	79.6934	0.389192	0.938375	0.206773	1.1541	3173
EHI_058490	329.812	339.224	316.409	413.701	314.371	408.78	0.20404	0.835591	0.206701	1.15405	1869
EHI_103760	105.432	127.095	89.7917	119.825	124.377	129.385	0.268781	0.883698	0.206333	1.15375	2328
EHI_060310	37.8473	26.5161	28.8616	33.236	40.1533	32.8149	0.518088	0.977769	0.206331	1.15375	4054
EHI_122910	6.75845	10.0578	10.6895	13.9941	4.89674	13.126	0.757632	1	0.205461	1.15305	5747
EHI_178680	309.537	323.68	355.96	354.226	394.677	392.841	0.175103	0.800016	0.205212	1.15286	1674
EHI_118740	237.897	264.247	224.479	339.357	233.085	265.332	0.240749	0.861951	0.205192	1.15284	2137
EHI_075850	85.1565	96.0067	90.8606	90.9617	109.687	114.383	0.279039	0.887051	0.204522	1.1523	2404
EHI_000300	158.148	195.671	205.238	209.037	226.23	211.891	0.204405	0.836515	0.204174	1.15203	1870
EHI_050540	77.0463	88.6919	64.1369	83.0901	85.2033	97.5072	0.329594	0.918226	0.203865	1.15178	2738
EHI_177160	35.1439	10.0578	20.31	26.239	19.587	27.1895	0.712849	1	0.203813	1.15174	5444
EHI_153000	35.1439	41.1457	45.9648	53.3526	43.0913	45.0033	0.439339	0.95824	0.203682	1.15163	3503
EHI_167730	354.143	309.05	355.96	367.346	433.851	371.277	0.191943	0.821202	0.203605	1.15157	1789
EHI_080240	67.5845	80.4627	56.6543	76.093	79.3272	81.5685	0.327301	0.918226	0.20358	1.15155	2717
EHI_069510	312.24	207.557	206.307	278.133	282.052	270.957	0.274088	0.886525	0.203297	1.15133	2364
EHI_125620	83.8048	93.2636	81.2401	79.5915	103.811	115.321	0.315147	0.913315	0.203246	1.15129	2640
EHI_188770	637.998	629.987	560.129	756.557	670.854	675.987	0.206294	0.838986	0.202912	1.15102	1882
EHI_103870	21.627	42.9744	27.7927	41.1077	40.1533	27.1895	0.493818	0.973637	0.2029	1.15101	3880
EHI_049730	296.02	383.112	297.168	415.45	354.524	356.276	0.218673	0.846409	0.202771	1.15091	1968
EHI_003000	121.652	129.838	123.998	156.559	136.129	139.698	0.23338	0.853522	0.202283	1.15052	2090
EHI_011060	129.762	133.495	97.2743	156.559	125.357	132.197	0.289281	0.896709	0.201876	1.15019	2468
EHI_135140	91.9149	116.122	96.2054	98.8334	118.501	135.01	0.291637	0.897438	0.201804	1.15014	2484
EHI_087590	22.9787	25.6018	14.9653	23.6151	23.5044	26.2519	0.541719	0.982629	0.201575	1.14995	4210
EHI_128120	18.9237	32.9166	19.2411	27.9882	25.4631	30.0022	0.512366	0.974958	0.201566	1.14995	4016
EHI_069050	162.203	208.472	211.652	230.028	246.796	195.952	0.236465	0.855689	0.20155	1.14993	2115
EHI_148120	35.1439	73.1479	48.1027	50.7287	71.4924	60.942	0.460163	0.961533	0.201388	1.1498	3662
EHI_115340	63.5294	90.5206	99.4122	68.2213	129.274	96.5696	0.425127	0.951576	0.201323	1.14975	3418
EHI_000930	132.466	131.666	85.5159	135.568	148.861	117.196	0.330354	0.918226	0.201274	1.14971	2746
EHI_041900	101.377	141.724	153.929	135.568	147.882	176.263	0.303008	0.901321	0.201222	1.14967	2571
EHI_197540	20.2754	33.8309	17.1032	29.7375	25.4631	28.1271	0.523806	0.980181	0.201099	1.14957	4090
EHI_108710	3752.29	3549.5	4344.21	4760.62	4178.88	4445.95	0.221582	0.846409	0.200888	1.14941	1997
EHI_017660	1016.47	615.357	885.089	1082.79	917.65	887.878	0.31328	0.910697	0.200779	1.14932	2632
EHI_053030	220.326	240.474	244.789	322.739	243.858	244.706	0.229942	0.852288	0.200749	1.1493	2065
EHI_037160	1285.46	939.037	1080.71	1095.04	1367.17	1333.22	0.257631	0.876793	0.20066	1.14922	2249
EHI_004200	11502.9	9059.37	11991.5	12682.2	11912.8	12813.8	0.227335	0.850867	0.200651	1.14922	2045
EHI_197800	29.7372	11.8865	21.379	25.3643	30.3598	15.0011	0.696384	1	0.200608	1.14918	5322
EHI_048970	32.4406	33.8309	25.6548	36.7346	33.2978	35.6276	0.467579	0.963871	0.200563	1.14915	3713
EHI_183220	36.4956	21.03	17.1032	23.6151	30.3598	30.0022	0.616371	0.994383	0.200043	1.14873	4740
EHI_101390	45.9575	62.1757	38.4821	72.5945	43.0913	53.4414	0.481926	0.968413	0.199857	1.14858	3808
EHI_007900	81.1014	72.2336	91.9296	96.2095	86.1827	98.4448	0.331811	0.918226	0.199705	1.14846	2760
EHI_002110	95.97	115.208	96.2054	111.953	105.77	136.885	0.291032	0.897438	0.19962	1.1484	2478
EHI_183270	51.3642	47.5462	50.2406	55.1018	53.8642	61.8796	0.403988	0.944743	0.199604	1.14838	3269
EHI_177360	41.9024	35.6596	44.8958	52.4779	45.05	42.1906	0.435277	0.956237	0.199556	1.14834	3483
EHI_179060	102.728	85.0345	115.446	125.947	127.315	93.7569	0.336186	0.920024	0.199511	1.14831	2794
EHI_159860	3713.09	3459.9	3382.15	3955.09	4011.41	4150.62	0.203173	0.83472	0.199228	1.14808	1863
EHI_016490	139.224	153.611	100.481	115.451	164.531	172.513	0.352014	0.930678	0.198878	1.14781	2895
EHI_103570	1.35169	12.8009	9.62054	6.99706	11.7522	10.3133	0.679563	0.997013	0.198875	1.1478	5216
EHI_159520	173.016	169.155	159.273	224.78	174.324	175.325	0.243889	0.864226	0.198822	1.14776	2160
EHI_158060	156.796	122.523	149.653	122.449	182.159	186.576	0.329079	0.918226	0.198661	1.14763	2733
EHI_012130	36.4956	42.0601	49.1716	59.475	54.8435	32.8149	0.49316	0.973349	0.198511	1.14751	3878
EHI_085000	97.3217	96.0067	51.3095	97.9588	94.0175	88.1315	0.41479	0.94759	0.198497	1.1475	3348
EHI_094790	54.0676	53.9466	68.4127	76.9676	57.7816	67.505	0.388181	0.938375	0.19846	1.14747	3163
EHI_065300	79.7497	83.2058	79.1022	110.204	72.4718	94.6945	0.362246	0.930992	0.198366	1.1474	2970
EHI_095710	0	2.74305	0	0.874632	0.979349	1.87514	1	1	0.198342	1.14738	7396
EHI_128080	40.5507	38.4027	30.9995	53.3526	46.0294	26.2519	0.539824	0.982629	0.197898	1.14703	4203
EHI_168250	90.5633	102.407	115.446	130.32	120.46	104.07	0.285803	0.893577	0.197689	1.14686	2446
EHI_148550	16.2203	26.5161	16.0342	20.1165	20.5663	28.1271	0.590663	0.98878	0.197512	1.14672	4571
EHI_097600	205.457	171.898	184.928	225.655	241.899	175.325	0.262458	0.881824	0.197461	1.14668	2276
EHI_103890	41.9024	42.9744	29.9306	59.475	29.3805	42.1906	0.560058	0.985128	0.197315	1.14656	4349
EHI_193360	528.511	593.413	654.196	725.945	706.11	605.67	0.236561	0.855689	0.197073	1.14637	2116
EHI_024420	901.577	822.914	829.504	945.477	1059.66	921.63	0.217503	0.846409	0.197039	1.14634	1961
EHI_114350	1265.18	1725.38	1245.32	1447.52	1618.86	1792.63	0.276637	0.886674	0.196984	1.1463	2388
EHI_123240	237.897	302.65	250.134	297.375	309.474	302.835	0.202947	0.83472	0.19686	1.1462	1860
EHI_110660	75.6947	113.379	90.8606	104.081	95.9762	123.759	0.337146	0.920024	0.196643	1.14603	2803
EHI_122730	158.148	199.328	161.411	201.165	213.498	182.826	0.229273	0.851873	0.196604	1.146	2060
EHI_052800	113.542	93.2636	129.343	123.323	131.233	129.385	0.306666	0.903946	0.196392	1.14583	2595
EHI_191400	4.05507	11.8865	9.62054	3.49853	18.6076	8.43812	0.79014	1	0.196227	1.1457	5987
EHI_139340	24.3304	16.4583	27.7927	32.3614	24.4837	20.6265	0.625956	0.99492	0.196142	1.14563	4806
EHI_109910	197.347	221.273	167.825	237.025	212.519	223.141	0.232381	0.853522	0.196141	1.14563	2082
EHI_153730	2191.09	2318.79	2235.17	2739.35	2497.34	2491.12	0.207338	0.840334	0.196129	1.14562	1887
EHI_167080	474.443	402.314	475.682	452.185	518.075	577.543	0.236211	0.855393	0.195931	1.14546	2113
EHI_008780	469.037	646.445	633.886	643.729	668.895	694.739	0.255335	0.875204	0.195636	1.14523	2233
EHI_151220	1102.98	1186.83	922.502	1238.48	1223.21	1216.96	0.230549	0.852888	0.195361	1.14501	2069
EHI_200070	700.176	653.76	642.438	704.954	793.272	786.62	0.216418	0.846409	0.195145	1.14484	1952
EHI_036580	793.442	633.644	729.023	742.563	904.918	818.498	0.250147	0.870393	0.194949	1.14468	2199
EHI_081310	43.2541	48.4605	50.2406	61.2243	57.7816	44.0657	0.417623	0.948352	0.194818	1.14458	3370
EHI_004190	377.122	434.316	359.167	487.17	418.182	435.032	0.22217	0.846409	0.194028	1.14395	2008
EHI_011840	155.444	135.324	102.619	158.308	154.737	135.01	0.321422	0.917059	0.193916	1.14386	2682
EHI_040820	1381.43	1323.98	1389.63	1498.24	1638.45	1546.99	0.21028	0.842674	0.193832	1.1438	1909
EHI_073480	94.6183	71.3192	70.5506	82.2154	115.563	71.2553	0.441161	0.95824	0.193623	1.14363	3521
EHI_113900	420.376	412.372	518.44	496.791	519.055	529.727	0.227745	0.851427	0.193446	1.14349	2046
EHI_103340	164.906	119.78	110.102	159.183	150.82	137.823	0.333368	0.918226	0.193383	1.14344	2778
EHI_005960	527.159	461.746	491.716	580.756	605.237	505.35	0.23069	0.852994	0.193382	1.14344	2070
EHI_168210	155.444	175.555	149.653	195.043	184.118	171.575	0.228069	0.851427	0.193112	1.14323	2048
EHI_122820	51.3642	64.9188	68.4127	67.3467	76.3892	69.3801	0.367222	0.931628	0.19309	1.14321	3017
EHI_124320	87.8599	92.3493	106.895	108.454	116.542	104.07	0.296519	0.899749	0.192893	1.14305	2521
EHI_000440	2831.79	3234.05	2783.54	3388.33	3377.77	3350.87	0.223321	0.847281	0.192886	1.14305	2017
EHI_151700	71.6396	44.8031	36.3442	66.472	67.575	38.4403	0.573426	0.985993	0.192722	1.14292	4449
EHI_194190	113.542	129.838	117.584	154.81	127.315	131.26	0.268448	0.88301	0.192451	1.1427	2326
EHI_130890	206.809	234.988	220.203	259.766	257.569	240.955	0.2011	0.83472	0.192379	1.14265	1842
EHI_062080	24.3304	11.8865	24.5858	35.8599	10.7728	21.5641	0.726854	1	0.192226	1.14252	5531
EHI_198960	174.368	228.587	175.308	254.518	211.539	196.89	0.275023	0.886525	0.192207	1.14251	2373
EHI_082560	33.7923	21.03	40.62	26.239	33.2978	48.7536	0.605766	0.993258	0.192138	1.14246	4668
EHI_009980	83.8048	67.6618	61.999	84.8393	73.4511	83.4437	0.384719	0.938375	0.191826	1.14221	3134
EHI_012160	82.4531	123.437	83.378	126.822	106.749	99.3823	0.362973	0.930992	0.191737	1.14214	2977
EHI_045010	346.033	348.367	313.202	387.462	345.71	417.218	0.214058	0.846409	0.191682	1.14209	1927
EHI_030440	93.2666	108.808	68.4127	95.3349	108.708	105.945	0.35826	0.930992	0.191179	1.1417	2942
EHI_067920	362.253	331.909	395.511	393.584	428.955	420.969	0.20737	0.840334	0.191163	1.14168	1888
EHI_196910	56.771	54.861	68.4127	79.5915	65.6164	60.0044	0.411087	0.947145	0.191149	1.14167	3317
EHI_152420	131.114	165.497	122.929	167.055	154.737	159.387	0.270662	0.884361	0.19113	1.14166	2337
EHI_097890	0	0	3.20685	0	3.91739	0	1	1	0.191025	1.14157	7308
EHI_199710	44.6058	41.1457	56.6543	49.854	45.05	67.505	0.473202	0.966144	0.190958	1.14152	3747
EHI_198780	162.203	125.266	140.032	174.052	182.159	129.385	0.330717	0.918226	0.190957	1.14152	2748
EHI_048660	59.4744	90.5206	67.3437	104.081	80.3066	65.6298	0.421029	0.950097	0.190943	1.14151	3385
EHI_142670	6.75845	8.22914	7.48264	9.62095	6.85544	9.37569	0.702498	1	0.190897	1.14147	5365
EHI_199680	63.5294	56.6897	29.9306	63.8482	54.8435	51.5663	0.511604	0.974958	0.19043	1.1411	4004
EHI_125940	594.744	591.584	521.647	668.219	661.06	618.796	0.228251	0.851427	0.190061	1.14081	2050
EHI_183580	229.787	291.677	264.03	300.873	252.672	345.025	0.259037	0.87887	0.190004	1.14077	2255
EHI_166470	813.718	701.306	708.713	834.399	838.322	861.626	0.234811	0.853522	0.18985	1.14065	2103
EHI_122870	216.27	232.245	237.307	290.378	242.878	249.393	0.217387	0.846409	0.189524	1.14039	1959
EHI_197510	1958.6	2450.46	2102.62	2782.21	2309.3	2336.42	0.259684	0.879479	0.189507	1.14037	2260
EHI_035570	45.9575	25.6018	35.2753	51.6033	46.0294	22.5017	0.626437	0.99492	0.189415	1.1403	4809
EHI_035190	236.546	179.212	204.169	267.637	238.961	196.89	0.2943	0.897438	0.189372	1.14027	2510
EHI_127160	798.849	1010.36	950.295	1174.63	1022.44	951.633	0.260829	0.88004	0.189195	1.14013	2268
EHI_118640	287.91	374.883	314.271	421.573	379.008	315.961	0.266457	0.882727	0.189074	1.14003	2307
EHI_055970	63.5294	68.5762	100.481	93.5856	83.2446	89.0691	0.393	0.939419	0.189067	1.14003	3202
EHI_045250	113.542	86.8632	114.377	125.947	105.77	124.697	0.341974	0.922371	0.189053	1.14001	2837
EHI_030880	240.601	266.99	253.341	307.871	314.371	246.581	0.234622	0.853522	0.188966	1.13995	2100
EHI_079910	105.432	115.208	106.895	92.711	154.737	127.509	0.365205	0.930992	0.188931	1.13992	3000
EHI_170190	51.3642	48.4605	55.5853	50.7287	67.575	59.0669	0.41215	0.947145	0.188765	1.13979	3329
EHI_189940	8293.97	8180.68	9256.02	9855.36	9816.01	9656.02	0.226137	0.850364	0.188751	1.13978	2034
EHI_058510	182.478	175.555	148.584	194.168	194.89	187.514	0.248267	0.869132	0.188704	1.13974	2185
EHI_115280	624.481	552.267	579.37	722.446	615.031	661.924	0.242225	0.862856	0.188689	1.13973	2148
EHI_097610	79.7497	79.5484	99.4122	89.2125	112.625	93.7569	0.352973	0.930821	0.188631	1.13968	2902
EHI_117820	1078.65	907.034	921.433	1027.69	1150.73	1132.58	0.242003	0.862856	0.188624	1.13968	2146
EHI_040480	29.7372	26.5161	32.0685	34.9853	39.1739	26.2519	0.507855	0.974958	0.188518	1.13959	3970
EHI_167050	6732.77	6063.05	6556.93	7060.91	7566.45	7422.73	0.226303	0.850364	0.188321	1.13944	2035
EHI_141990	615.019	533.066	590.06	589.502	730.594	659.111	0.25087	0.870822	0.188181	1.13933	2205
EHI_087730	52.7159	49.3749	18.1721	50.7287	55.8229	30.0022	0.644364	0.99492	0.188034	1.13921	4952
EHI_193830	1.35169	1.8287	3.20685	1.74926	3.91739	1.87514	1	1	0.188006	1.13919	7342
EHI_095040	94.6183	85.9488	82.309	111.953	105.77	80.6309	0.362199	0.930992	0.187714	1.13896	2969
EHI_152090	452.816	602.556	504.544	635.858	521.993	621.608	0.276068	0.886525	0.187706	1.13895	2382
EHI_052810	835.345	931.722	854.09	980.463	1050.84	954.445	0.234202	0.853522	0.187079	1.13846	2097
EHI_092450	3519.8	4420.88	4473.55	4625.06	4650.93	4857.55	0.259567	0.879472	0.186809	1.13824	2259
EHI_110460	517.697	458.089	433.993	506.412	583.692	512.85	0.244841	0.865594	0.186635	1.13811	2165
EHI_087820	141.927	139.895	112.24	174.052	148.861	124.697	0.326902	0.918226	0.186557	1.13804	2714
EHI_182940	86.5082	87.7775	74.8264	87.4632	94.0175	102.195	0.342846	0.922371	0.186457	1.13797	2845
EHI_193810	17.572	12.8009	8.55159	14.8687	9.79349	18.7514	0.727651	1	0.18624	1.13779	5540
EHI_196950	444.706	426.087	431.855	513.409	463.232	504.412	0.222047	0.846409	0.18607	1.13766	2002
EHI_013910	21.627	12.8009	21.379	18.3673	21.5457	22.5017	0.658022	0.99492	0.185844	1.13748	5054
EHI_154260	101.377	69.4905	117.584	120.699	109.687	95.632	0.418426	0.948687	0.185843	1.13748	3375
EHI_119270	77.0463	136.238	98.3433	122.449	126.336	109.696	0.369539	0.932432	0.185712	1.13738	3032
EHI_061240	58.1227	60.3471	35.2753	69.0959	51.9055	53.4414	0.492178	0.972162	0.185702	1.13737	3875
EHI_168040	136.521	119.78	94.0675	153.935	123.398	119.071	0.369003	0.932432	0.185572	1.13727	3029
EHI_044590	7462.68	5853.66	6578.31	7538.45	7638.92	7444.3	0.253026	0.871586	0.185525	1.13723	2222
EHI_108650	82.4531	137.152	95.1364	123.323	110.666	127.509	0.363507	0.930992	0.185398	1.13713	2982
EHI_178940	366.308	348.367	378.408	362.098	453.438	427.532	0.232159	0.853522	0.185256	1.13702	2081
EHI_050290	289.262	230.416	261.892	272.011	298.701	315.023	0.249132	0.869373	0.184842	1.13669	2192
EHI_035400	419.024	456.26	390.166	551.018	452.459	435.032	0.259281	0.878893	0.184634	1.13653	2258
EHI_182640	29.7372	32.0022	38.4821	35.8599	43.0913	35.6276	0.531803	0.982006	0.184501	1.13642	4145
EHI_196600	29.7372	31.0879	28.8616	33.236	33.2978	35.6276	0.520288	0.977769	0.184452	1.13639	4072
EHI_110820	47.3092	64.0044	53.4474	65.5974	56.8022	66.5674	0.413325	0.94715	0.184404	1.13635	3339
EHI_139350	9.46183	6.40044	10.6895	7.87169	9.79349	12.1884	0.730978	1	0.184387	1.13633	5563
EHI_181170	406.859	442.545	303.581	464.43	422.099	423.781	0.288359	0.896273	0.184307	1.13627	2462
EHI_152260	82.4531	78.634	67.3437	83.0901	114.584	61.8796	0.456724	0.961533	0.184184	1.13617	3627
EHI_023180	627.184	696.734	628.542	776.673	712.966	729.429	0.241128	0.862025	0.183925	1.13597	2141
EHI_126980	435.244	365.74	405.131	444.313	462.252	461.284	0.237252	0.856568	0.183917	1.13596	2120
EHI_094070	304.13	238.645	283.271	306.996	303.598	324.399	0.241868	0.862856	0.183699	1.13579	2144
EHI_004360	60.8261	98.7497	122.929	125.947	96.9555	100.32	0.444411	0.958266	0.183506	1.13564	3549
EHI_153450	1788.29	1776.58	1634.42	2056.26	1890.14	1955.77	0.241919	0.862856	0.183061	1.13529	2145
EHI_000590	9847.06	10824.1	11310.5	11942.2	11958.8	12408.7	0.235058	0.853522	0.183047	1.13528	2107
EHI_050410	174.368	175.555	151.791	180.174	212.519	177.201	0.269294	0.884361	0.183013	1.13525	2329
EHI_133770	2.70338	5.4861	5.34474	1.74926	3.91739	10.3133	0.882204	1	0.182829	1.13511	6580
EHI_127090	301.427	272.476	272.582	335.859	293.805	329.087	0.225497	0.849805	0.182757	1.13505	2031
EHI_076780	35.1439	39.317	37.4132	55.9765	37.2152	33.7525	0.535049	0.982629	0.182155	1.13458	4163
EHI_052890	218.974	206.643	239.444	314.868	203.704	234.392	0.331368	0.918226	0.18164	1.13417	2754
EHI_140270	44.6058	42.0601	42.7579	55.1018	49.9468	41.253	0.474493	0.966489	0.1816	1.13414	3756
EHI_164380	132.466	174.641	157.135	149.562	192.932	187.514	0.298006	0.900132	0.181526	1.13408	2534
EHI_062840	473.092	411.457	377.339	471.427	484.778	472.535	0.25351	0.872076	0.181428	1.13401	2225
EHI_109990	2315.45	2279.47	2187.07	2543.43	2608.98	2538	0.238253	0.858171	0.181399	1.13398	2123
EHI_022280	9.46183	17.3726	9.62054	21.8658	7.83479	12.1884	0.750168	1	0.1813	1.13391	5695
EHI_148450	100.025	75.891	76.9643	72.5945	107.728	105.008	0.442346	0.95824	0.181202	1.13383	3530
EHI_030760	35026.4	35620.3	36052.4	41561.6	40085.7	39331	0.245894	0.866516	0.181199	1.13383	2172
EHI_105840	27.0338	22.8587	39.5511	34.1107	32.3185	34.6901	0.596427	0.989416	0.18109	1.13374	4613
EHI_180400	1.35169	1.8287	3.20685	2.6239	0	4.68785	1	1	0.180892	1.13358	7396
EHI_008770	331.164	284.363	298.237	427.695	301.639	303.772	0.311837	0.91021	0.180764	1.13348	2621
EHI_008400	133.817	210.3	149.653	208.162	164.531	190.327	0.346823	0.927468	0.18044	1.13323	2861
EHI_035950	31.0889	38.4027	50.2406	38.4838	44.0707	54.379	0.498722	0.974958	0.180412	1.13321	3912
EHI_175060	374.418	430.659	437.2	495.916	449.521	464.097	0.244368	0.865121	0.180347	1.13316	2162
EHI_085030	56.771	56.6897	53.4474	53.3526	73.4511	62.8171	0.437857	0.95824	0.18027	1.1331	3497
EHI_068180	56.771	89.6062	101.55	93.5856	108.708	81.5685	0.434014	0.955098	0.180196	1.13304	3478
EHI_200050	63.5294	42.9744	49.1716	42.857	62.6783	69.3801	0.538772	0.982629	0.180175	1.13302	4194
EHI_065770	321.702	343.795	326.029	370.844	367.256	386.278	0.22041	0.846409	0.180094	1.13296	1987
EHI_040800	4830.94	3744.26	4301.45	4692.4	5031.89	4858.48	0.274881	0.886525	0.179802	1.13273	2372
EHI_038540	202.754	238.645	257.617	266.763	276.176	251.269	0.248525	0.869132	0.179539	1.13252	2188
EHI_030400	270.338	270.647	242.651	310.494	277.156	299.085	0.231875	0.853522	0.179237	1.13228	2077
EHI_006700	378.473	346.538	373.063	380.465	478.901	383.466	0.258457	0.878822	0.179113	1.13219	2251
EHI_182470	1689.61	1323.06	1476.22	1688.91	1638.45	1751.38	0.275597	0.886525	0.17902	1.13211	2377
EHI_016460	825.883	713.192	740.781	820.405	922.546	836.312	0.270622	0.884361	0.178942	1.13205	2336
EHI_003250	62.1778	71.3192	58.7922	84.8393	70.5131	62.8171	0.4311	0.953872	0.17876	1.13191	3459
EHI_150440	336.571	330.08	317.478	356.85	379.987	376.903	0.228045	0.851427	0.178692	1.13186	2047
EHI_189550	41.9024	34.7453	45.9648	53.3526	49.9468	34.6901	0.521973	0.978917	0.178621	1.1318	4081
EHI_093580	2750.69	2668.99	2661.68	3080.45	3083.97	2981.47	0.246501	0.867057	0.178597	1.13178	2176
EHI_141410	393.342	329.166	282.202	334.984	375.09	424.719	0.305019	0.902158	0.178557	1.13175	2587
EHI_049530	112.19	102.407	117.584	120.699	156.696	98.4448	0.391388	0.938772	0.178487	1.1317	3190
EHI_076890	318.999	327.337	267.237	333.235	387.822	313.148	0.270582	0.884361	0.178377	1.13161	2335
EHI_185130	60.8261	46.6318	35.2753	54.2272	62.6783	43.1282	0.535657	0.982629	0.17798	1.1313	4168
EHI_141560	14.8686	15.5439	27.7927	17.4926	26.4424	22.5017	0.644748	0.99492	0.177966	1.13129	4957
EHI_181200	327.109	284.363	284.34	308.745	343.751	359.089	0.251837	0.871243	0.177902	1.13124	2211
EHI_135700	35.1439	38.4027	12.8274	41.9823	25.4631	30.0022	0.679398	0.997013	0.177806	1.13116	5215
EHI_163720	13.5169	14.6296	19.2411	13.9941	10.7728	29.0646	0.732712	1	0.177729	1.1311	5578
EHI_035370	48.6609	52.1179	45.9648	56.8511	64.637	45.0033	0.475763	0.967868	0.177634	1.13103	3761
EHI_080750	200.05	175.555	195.618	238.775	201.746	203.452	0.275992	0.886525	0.1776	1.131	2381
EHI_197160	4980.98	5229.16	4634.96	5873.16	4496.19	6419.54	0.315638	0.913747	0.177528	1.13094	2643
EHI_151850	14.8686	36.574	27.7927	34.1107	34.2772	23.4392	0.583749	0.987974	0.177286	1.13075	4519
EHI_202590	732.616	796.398	683.058	950.725	757.036	793.183	0.292028	0.897438	0.176953	1.13049	2490
EHI_147890	95.97	106.065	120.791	119.825	129.274	117.196	0.327778	0.918226	0.176606	1.13022	2721
EHI_126900	729.913	762.567	786.746	861.513	892.186	823.186	0.262178	0.881824	0.176606	1.13022	2272
EHI_105330	171.665	226.759	182.79	257.142	185.097	216.578	0.32819	0.918226	0.176397	1.13006	2726
EHI_126330	36.4956	33.8309	43.8269	45.4809	36.2359	46.8785	0.506325	0.974958	0.176262	1.12995	3962
EHI_047770	323.054	299.907	243.72	303.497	365.297	309.398	0.286961	0.895261	0.176016	1.12976	2452
EHI_118280	0	0.914349	2.1379	1.74926	0	1.87514	1	1	0.176	1.12975	7396
EHI_021400	110.839	123.437	96.2054	119.825	145.923	108.758	0.361132	0.930992	0.175826	1.12961	2961
EHI_143120	151.389	169.155	125.067	182.798	166.489	154.699	0.316192	0.91411	0.175764	1.12956	2647
EHI_006930	439.299	414.2	486.372	572.009	459.314	480.973	0.282694	0.890222	0.17562	1.12945	2429
EHI_094040	32.4406	42.0601	36.3442	59.475	30.3598	35.6276	0.571462	0.985128	0.175015	1.12898	4440
EHI_073370	81.1014	68.5762	81.2401	90.9617	75.4098	92.8193	0.404468	0.944743	0.174749	1.12877	3270
EHI_181580	66.2328	65.8331	70.5506	56.8511	90.1001	82.5061	0.453211	0.961175	0.174686	1.12872	3609
EHI_040470	78.398	117.037	79.1022	125.072	95.9762	90.9442	0.432318	0.954292	0.174619	1.12867	3466
EHI_096570	21306.7	27129.7	22901.1	32677.1	24015.6	23802.1	0.346415	0.927409	0.174205	1.12834	2859
EHI_197210	218.974	213.043	206.307	251.019	231.126	237.205	0.247241	0.867076	0.173927	1.12813	2182
EHI_042170	10733.8	14800.6	12388	14496.2	14012.5	14267.9	0.303129	0.901321	0.173645	1.1279	2574
EHI_106070	509.587	474.547	438.269	572.884	489.674	540.04	0.274875	0.886525	0.173601	1.12787	2371
EHI_160890	131.114	138.067	114.377	146.938	125.357	160.324	0.331969	0.918226	0.173467	1.12777	2761
EHI_179980	2220.83	1706.18	2140.03	2281.92	2276.99	2280.17	0.297955	0.900132	0.173419	1.12773	2533
EHI_181230	140.576	146.296	171.032	181.923	155.716	179.076	0.303971	0.90178	0.173178	1.12754	2580
EHI_008040	651.515	588.841	547.302	681.338	665.957	666.612	0.279369	0.887051	0.173166	1.12753	2408
EHI_074180	170028	198757	193427	210988	213473	209373	0.282861	0.890222	0.172985	1.12739	2432
EHI_069580	86.5082	106.979	94.0675	105.83	115.563	105.008	0.347549	0.927515	0.172933	1.12735	2868
EHI_194510	25.6821	28.3448	36.3442	47.2301	27.4218	27.1895	0.63104	0.99492	0.1728	1.12724	4835
EHI_013010	364.956	406.885	347.408	495.916	371.173	394.717	0.294571	0.897908	0.172544	1.12704	2511
EHI_029340	83.8048	69.4905	79.1022	96.2095	90.1001	74.068	0.430204	0.953381	0.172499	1.12701	3453
EHI_137240	9.46183	23.7731	30.9995	27.9882	14.6902	30.9398	0.685344	0.999427	0.172467	1.12698	5247
EHI_152790	83.8048	53.9466	38.4821	69.0959	51.9055	75.0055	0.596384	0.989416	0.172454	1.12697	4612
EHI_182530	212.215	194.756	218.065	253.643	226.23	223.141	0.266914	0.882727	0.17245	1.12697	2313
EHI_195060	209.512	167.326	161.411	217.783	203.704	181.888	0.321462	0.917059	0.172422	1.12695	2683
EHI_160920	74.343	108.808	101.55	132.944	101.852	88.1315	0.428186	0.952722	0.172398	1.12693	3439
EHI_046640	67.5845	67.6618	49.1716	70.8452	57.7816	78.7558	0.471638	0.964907	0.172357	1.1269	3741
EHI_077530	2099.18	2290.44	2018.17	2658.01	2252.5	2310.17	0.286665	0.895199	0.172204	1.12678	2451
EHI_194990	128.411	196.585	172.101	206.413	182.159	175.325	0.337286	0.920024	0.172158	1.12674	2806
EHI_151470	128.411	105.15	91.9296	95.3349	135.15	135.01	0.421924	0.950097	0.172157	1.12674	3394
EHI_115390	543.38	445.288	482.096	490.669	616.01	548.478	0.301555	0.901321	0.172034	1.12665	2557
EHI_096160	252.766	304.478	278.996	327.987	339.834	276.583	0.270767	0.884361	0.171528	1.12625	2339
EHI_023610	270.338	270.647	302.512	306.121	312.412	331.899	0.247299	0.867076	0.171505	1.12623	2183
EHI_020340	171.665	201.157	206.307	236.151	214.477	203.452	0.284132	0.891986	0.171451	1.12619	2438
EHI_179930	175.72	187.442	188.135	202.04	187.056	232.517	0.285912	0.893577	0.171328	1.12609	2449
EHI_194210	47.3092	56.6897	34.2063	35.8599	64.637	56.2541	0.558981	0.985128	0.171183	1.12598	4342
EHI_127390	45.9575	64.9188	63.068	78.7169	55.8229	62.8171	0.461626	0.961538	0.171067	1.12589	3674
EHI_121840	187.885	136.238	159.273	139.067	225.25	178.138	0.413624	0.94715	0.170805	1.12569	3341
EHI_093830	108.135	168.24	105.826	153.061	129.274	150.949	0.404745	0.944743	0.170752	1.12564	3275
EHI_152120	742.078	641.873	654.196	786.294	768.789	736.929	0.28251	0.890222	0.170731	1.12563	2428
EHI_152110	97.3217	128.923	94.0675	100.583	137.109	125.634	0.382435	0.938063	0.170696	1.1256	3120
EHI_137760	105.432	92.3493	68.4127	80.4662	106.749	111.571	0.448882	0.95928	0.170694	1.1256	3578
EHI_135110	94.6183	90.5206	86.5848	104.956	102.832	97.5072	0.353737	0.930856	0.170662	1.12557	2908
EHI_044490	412.266	358.425	348.477	429.444	415.244	412.53	0.26079	0.88004	0.170655	1.12557	2265
EHI_073660	497.422	514.779	540.888	479.298	623.845	645.985	0.315086	0.913315	0.17044	1.1254	2639
EHI_148430	79.7497	74.0623	74.8264	92.711	77.3685	86.2564	0.402726	0.944743	0.170405	1.12537	3259
EHI_062850	110.839	119.78	91.9296	113.702	148.861	101.257	0.411918	0.947145	0.170096	1.12513	3328
EHI_106300	205.457	236.816	274.72	269.387	297.722	241.893	0.302313	0.901321	0.170061	1.12511	2565
EHI_177550	159.499	136.238	100.481	126.822	143.964	173.45	0.422547	0.950097	0.169975	1.12504	3403
EHI_154450	4209.16	4419.96	4648.86	5603.77	4393.36	4940.05	0.302076	0.901321	0.169855	1.12495	2563
EHI_017890	0	0	3.20685	1.74926	0.979349	0.937569	1	1	0.169766	1.12488	7367
EHI_198320	139.224	143.553	105.826	133.819	147.882	155.636	0.356477	0.930992	0.169712	1.12483	2929
EHI_164840	110.839	92.3493	90.8606	98.8334	141.026	90.0066	0.44069	0.95824	0.169523	1.12469	3516
EHI_038650	31.0889	40.2314	24.5858	32.3614	39.1739	37.5028	0.575325	0.986045	0.16915	1.1244	4465
EHI_007330	7918.2	9370.25	9221.82	9990.05	9641.69	10177.3	0.28779	0.895913	0.169085	1.12435	2458
EHI_013090	32.4406	32.9166	38.4821	26.239	50.9261	40.3155	0.593208	0.988981	0.168925	1.12422	4591
EHI_141790	4.05507	19.2013	4.27579	10.4956	11.7522	10.3133	0.792576	1	0.168911	1.12421	6008
EHI_201220	14.8686	10.9722	5.34474	11.3702	14.6902	8.43812	0.843095	1	0.168833	1.12415	6354
EHI_131220	51.3642	66.7475	60.9301	70.8452	55.8229	75.9431	0.451696	0.959798	0.168537	1.12392	3601
EHI_001120	250.063	211.215	189.204	225.655	232.106	270.957	0.31812	0.915727	0.16847	1.12387	2658
EHI_152880	409.562	363.911	430.786	508.161	430.913	412.53	0.302064	0.901321	0.168346	1.12377	2562
EHI_001820	27.0338	38.4027	39.5511	42.857	34.2772	42.1906	0.555922	0.984207	0.16833	1.12376	4322
EHI_042690	148.686	93.2636	166.756	160.932	166.489	129.385	0.4525	0.96005	0.168187	1.12365	3607
EHI_091540	305.482	286.191	286.478	349.853	278.135	357.214	0.294283	0.897438	0.16817	1.12363	2508
EHI_175000	5.40676	9.14349	7.48264	5.24779	15.6696	4.68785	0.823342	1	0.167991	1.12349	6207
EHI_142030	29.7372	46.6318	21.379	40.2331	37.2152	33.7525	0.623593	0.99492	0.167787	1.12333	4788
EHI_135220	58.1227	59.4327	49.1716	62.9735	53.8642	70.3177	0.456914	0.961533	0.167785	1.12333	3628
EHI_075040	20.2754	12.8009	25.6548	19.2419	26.4424	19.689	0.685654	0.999427	0.16736	1.123	5251
EHI_087210	64.8811	64.0044	61.999	67.3467	56.8022	90.0066	0.485402	0.968413	0.167341	1.12299	3831
EHI_037130	20291.6	17769.5	20909.7	23132.3	22339.9	20745.6	0.297798	0.900132	0.167253	1.12292	2531
EHI_127240	969.162	988.412	931.054	1066.18	1117.44	1060.39	0.276396	0.886525	0.167242	1.12291	2385
EHI_050340	112.19	113.379	160.342	134.693	139.067	160.324	0.392492	0.939419	0.167209	1.12288	3195
EHI_147530	205.457	298.992	277.927	339.357	244.837	297.209	0.364281	0.930992	0.16698	1.12271	2991
EHI_074770	273.041	266.99	245.858	252.769	324.164	305.648	0.291578	0.897438	0.166919	1.12266	2483
EHI_103590	688.01	766.225	774.988	740.813	843.219	919.755	0.310663	0.9093	0.166475	1.12231	2615
EHI_155200	79.7497	77.7197	57.7232	88.3379	81.2859	71.2553	0.451482	0.959798	0.166468	1.12231	3600
EHI_138450	35.1439	51.2036	55.5853	58.6004	50.9261	51.5663	0.502156	0.974958	0.166434	1.12228	3935
EHI_164770	75.6947	71.3192	71.6195	83.0901	74.4305	87.1939	0.423038	0.950097	0.166421	1.12227	3408
EHI_047210	5.40676	12.8009	5.34474	4.37316	16.6489	6.56298	0.843707	1	0.166326	1.1222	6356
EHI_055680	66.2328	59.4327	67.3437	82.2154	69.5337	63.7547	0.452556	0.96005	0.165733	1.12174	3608
EHI_186830	61943.9	42630.6	60298.3	59253.7	64098.4	61587	0.366234	0.931628	0.16572	1.12173	3006
EHI_074790	36.4956	16.4583	27.7927	27.1136	32.3185	29.0646	0.667818	0.99492	0.165656	1.12168	5133
EHI_135050	171.665	164.583	171.032	209.912	199.787	158.449	0.336358	0.920024	0.165145	1.12128	2795
EHI_130970	217.622	188.356	175.308	234.401	207.622	207.203	0.320491	0.91657	0.16512	1.12126	2675
EHI_024460	164.906	148.125	94.0675	174.052	135.15	145.323	0.46082	0.961538	0.164892	1.12108	3668
EHI_118450	87.8599	65.8331	97.2743	90.9617	94.0175	94.6945	0.449544	0.95928	0.164642	1.12089	3583
EHI_178450	171.665	202.986	194.549	212.536	195.87	231.58	0.302095	0.901321	0.164485	1.12077	2564
EHI_072640	10.8135	7.31479	20.31	10.4956	14.6902	17.8138	0.744247	1	0.164306	1.12063	5653
EHI_018590	158.148	160.925	154.998	195.918	158.654	176.263	0.322972	0.918226	0.164274	1.1206	2689
EHI_169610	304.13	312.707	269.375	357.725	284.011	350.651	0.305485	0.902774	0.163977	1.12037	2590
EHI_044860	135.169	146.296	162.48	186.297	166.489	145.323	0.339305	0.920689	0.16396	1.12036	2820
EHI_185120	20.2754	2.74305	4.27579	9.62095	12.7315	6.56298	0.86604	1	0.163803	1.12024	6488
EHI_040680	143.279	196.585	142.17	189.795	191.952	161.262	0.361463	0.930992	0.163794	1.12023	2964
EHI_050100	310.889	264.247	264.03	330.611	305.557	300.96	0.288094	0.896115	0.163706	1.12016	2460
EHI_178600	64.8811	70.4049	78.0332	79.5915	87.162	73.1304	0.422226	0.950097	0.163628	1.1201	3398
EHI_138030	212.215	205.729	173.17	223.031	230.147	208.14	0.308719	0.906612	0.163421	1.11994	2606
EHI_170390	55.4193	43.8888	40.62	72.5945	65.6164	17.8138	0.693033	1	0.163212	1.11978	5292
EHI_012050	197.347	174.641	179.583	209.912	227.209	179.076	0.329443	0.918226	0.16309	1.11968	2736
EHI_044850	221.677	264.247	259.754	268.512	253.651	315.023	0.30847	0.906612	0.163003	1.11962	2602
EHI_085370	197.347	179.212	173.17	217.783	205.663	190.327	0.308681	0.906612	0.162926	1.11956	2605
EHI_038560	287.91	288.02	331.374	339.357	346.689	330.024	0.279471	0.887051	0.162687	1.11937	2409
EHI_125880	101.377	102.407	72.6885	118.95	98.9142	90.9442	0.455521	0.961533	0.16246	1.11919	3619
EHI_128590	4.05507	0.914349	2.1379	2.6239	0.979349	3.75028	1	1	0.162459	1.11919	7396
EHI_192840	71.6396	70.4049	37.4132	54.2272	70.5131	75.9431	0.567527	0.985128	0.162311	1.11908	4405
EHI_120360	3417.07	3421.49	3219.67	3779.29	3755.8	3719.34	0.296733	0.899749	0.16213	1.11894	2523
EHI_127670	33.7923	5.4861	24.5858	25.3643	11.7522	32.8149	0.841401	1	0.162115	1.11893	6340
EHI_072130	63.5294	74.9766	86.5848	87.4632	83.2446	82.5061	0.43184	0.954187	0.162107	1.11892	3464
EHI_062680	232.491	292.592	219.134	284.255	246.796	303.772	0.332082	0.918226	0.161922	1.11878	2762
EHI_148790	6188.04	6250.49	7973.29	7820.09	6897.55	8117.47	0.343438	0.922967	0.16182	1.1187	2848
EHI_126930	421.727	469.061	433.993	560.639	474.005	448.158	0.312859	0.910697	0.161778	1.11867	2628
EHI_005060	7903.33	9454.37	8128.28	9443.4	9205.88	9862.29	0.311022	0.909419	0.161729	1.11863	2617
EHI_021540	4.05507	8.22914	5.34474	5.24779	4.89674	10.3133	0.889254	1	0.161619	1.11854	6618
EHI_199050	1688.26	1511.42	1574.56	1784.25	1734.43	1819.82	0.301721	0.901321	0.161598	1.11853	2559
EHI_049290	123.004	156.354	187.066	150.437	198.808	175.325	0.395193	0.94172	0.161282	1.11828	3212
EHI_117980	66.2328	60.3471	60.9301	68.2213	68.5544	72.1928	0.464796	0.963356	0.161029	1.11808	3688
EHI_148480	1286.81	1547.99	1433.46	1554.22	1570.88	1649.18	0.311299	0.909419	0.160856	1.11795	2620
EHI_165340	163.555	138.981	148.584	143.44	195.87	164.075	0.374871	0.934918	0.160819	1.11792	3069
EHI_183250	2132.97	2276.73	1897.38	2526.81	2192.76	2330.8	0.322912	0.918226	0.160693	1.11782	2688
EHI_110220	250.063	234.988	200.962	257.142	244.837	263.457	0.308987	0.906612	0.160659	1.1178	2607
EHI_087410	63.5294	42.0601	86.5848	72.5945	75.4098	65.6298	0.557276	0.984424	0.160575	1.11773	4332
EHI_067520	10514.8	11304.1	10783.6	12500.2	12166.4	11774.9	0.291052	0.897438	0.160568	1.11773	2479
EHI_024610	113.542	88.6919	105.826	78.7169	118.501	146.261	0.50684	0.974958	0.160452	1.11764	3965
EHI_105850	10.8135	13.7152	10.6895	16.618	12.7315	10.3133	0.768527	1	0.160363	1.11757	5825
EHI_080260	4205.11	4212.41	3554.25	4465.87	4071.15	4841.61	0.332423	0.918226	0.16035	1.11756	2765
EHI_020970	6.75845	1.8287	5.34474	6.99706	2.93805	4.68785	0.869365	1	0.160224	1.11746	6504
EHI_050470	271.69	270.647	272.582	313.993	311.433	285.021	0.274752	0.886525	0.160041	1.11732	2369
EHI_163250	67.5845	60.3471	79.1022	97.0842	67.575	65.6298	0.50389	0.974958	0.159838	1.11716	3947
EHI_197850	68.9362	57.604	39.5511	55.9765	64.637	63.7547	0.536656	0.982629	0.159832	1.11716	4175
EHI_177420	21.627	45.7175	50.2406	26.239	53.8642	53.4414	0.645301	0.99492	0.159718	1.11707	4961
EHI_125740	946.183	970.125	892.572	1144.89	1016.56	976.009	0.313283	0.910697	0.159693	1.11705	2633
EHI_125840	11208.2	10251.7	11023	12020.1	11935.3	12328.1	0.294298	0.897438	0.15968	1.11704	2509
EHI_140550	7527.56	8904.85	8053.46	9458.27	8800.43	9093.48	0.312891	0.910697	0.159597	1.11698	2629
EHI_073670	327.109	425.172	348.477	398.832	408.388	425.656	0.306945	0.903946	0.15939	1.11681	2599
EHI_166050	67.5845	71.3192	75.8953	62.0989	76.3892	102.195	0.497954	0.974958	0.159342	1.11678	3905
EHI_088460	838.048	807.37	805.987	1057.43	823.632	855.063	0.342055	0.922371	0.159141	1.11662	2838
EHI_024580	55.4193	85.0345	59.8611	73.4691	89.1207	63.7547	0.50455	0.974958	0.159102	1.11659	3952
EHI_040620	150.038	195.671	127.205	164.431	189.014	177.201	0.39002	0.938375	0.159047	1.11655	3181
EHI_035770	329.812	297.164	346.339	299.124	366.276	420.969	0.352532	0.930794	0.158991	1.11651	2898
EHI_098780	14790.2	18808.2	17620.5	19234.9	19769.1	18172	0.333388	0.918226	0.158653	1.11624	2779
EHI_067090	9222.58	8415.67	8689.48	8705.21	11097	9580.08	0.33476	0.919774	0.158388	1.11604	2785
EHI_164450	78.398	66.7475	76.9643	99.7081	73.4511	73.1304	0.50205	0.974958	0.158238	1.11592	3931
EHI_010120	64.8811	44.8031	55.5853	56.8511	47.0087	78.7558	0.579114	0.986544	0.158233	1.11592	4493
EHI_148110	112.19	93.2636	113.309	140.816	116.542	96.5696	0.440957	0.95824	0.158204	1.1159	3520
EHI_159140	45.9575	43.8888	66.2748	60.3496	52.8848	60.942	0.529815	0.981673	0.158124	1.11583	4130
EHI_105830	110.839	165.497	125.067	138.192	163.551	150.011	0.394646	0.94172	0.157902	1.11566	3206
EHI_026430	346.033	318.194	267.237	352.477	361.38	323.461	0.326373	0.918226	0.157479	1.11534	2712
EHI_152630	408.21	432.487	366.649	512.534	395.657	437.845	0.340781	0.922371	0.157134	1.11507	2827
EHI_069430	210.864	284.363	249.065	308.745	264.424	259.707	0.341232	0.922371	0.156834	1.11484	2829
EHI_179360	85.1565	89.6062	73.7574	82.2154	99.8935	95.632	0.425793	0.951576	0.156742	1.11477	3424
EHI_135010	50.0125	45.7175	37.4132	25.3643	50.9261	72.1928	0.668766	0.99492	0.156635	1.11468	5143
EHI_169330	91.9149	91.4349	91.9296	82.2154	115.563	109.696	0.445243	0.958619	0.156376	1.11448	3555
EHI_082380	593.392	524.836	599.68	625.362	676.73	611.295	0.3253	0.918226	0.156361	1.11447	2704
EHI_051050	583.93	590.67	455.372	580.756	612.093	623.483	0.351903	0.930678	0.15633	1.11445	2892
EHI_037210	89.2116	106.979	126.136	133.819	103.811	122.822	0.427727	0.952722	0.156176	1.11433	3435
EHI_182480	1081.35	1208.77	1083.91	1323.32	1203.62	1233.84	0.3192	0.915727	0.156112	1.11428	2668
EHI_162230	29.7372	42.9744	21.379	31.4868	38.1946	36.5652	0.631444	0.99492	0.15603	1.11422	4838
EHI_142920	20.2754	38.4027	20.31	32.3614	23.5044	33.7525	0.643199	0.99492	0.15593	1.11414	4937
EHI_155520	882.654	954.581	867.986	1053.06	924.505	1036.95	0.32533	0.918226	0.155885	1.11411	2705
EHI_064580	58.1227	42.9744	55.5853	63.8482	46.0294	62.8171	0.578366	0.986544	0.155865	1.11409	4486
EHI_104520	252.766	319.108	261.892	383.089	252.672	294.397	0.390881	0.938758	0.155804	1.11404	3186
EHI_178590	1246.26	1441.01	1340.46	1635.56	1404.39	1448.54	0.330327	0.918226	0.155786	1.11403	2745
EHI_048680	170.313	162.754	146.446	177.55	192.932	163.137	0.345399	0.925187	0.155775	1.11402	2857
EHI_007920	159.499	135.324	171.032	179.3	160.613	177.201	0.368448	0.932184	0.155595	1.11388	3024
EHI_199030	58.1227	64.0044	65.2059	61.2243	77.3685	71.2553	0.460484	0.961538	0.155536	1.11384	3665
EHI_178730	205.457	213.958	206.307	226.53	256.589	214.703	0.313206	0.910697	0.155416	1.11374	2631
EHI_178630	150.038	138.067	157.135	194.168	169.427	131.26	0.417324	0.948352	0.155413	1.11374	3366
EHI_068020	160.851	178.298	136.825	196.792	177.262	156.574	0.375549	0.935501	0.15538	1.11372	3072
EHI_065320	921.853	789.083	1075.36	805.536	1173.26	1124.15	0.416265	0.947977	0.155339	1.11368	3358
EHI_003020	2.70338	2.74305	5.34474	1.74926	3.91739	6.56298	1	1	0.155217	1.11359	7396
EHI_174640	478.498	483.691	519.509	529.152	569.981	551.291	0.31283	0.910697	0.155039	1.11345	2627
EHI_142090	928.611	939.037	1013.36	1090.67	1065.53	1051.95	0.314762	0.913264	0.155017	1.11343	2638
EHI_064630	67.5845	58.5184	55.5853	64.7228	55.8229	80.6309	0.542182	0.982629	0.155003	1.11342	4213
EHI_131240	62.1778	70.4049	44.8958	73.4691	57.7816	66.5674	0.528358	0.980653	0.154972	1.1134	4123
EHI_031640	75.6947	137.152	100.481	148.687	87.162	115.321	0.533865	0.982629	0.15433	1.1129	4156
EHI_193510	254.118	219.444	270.444	257.142	299.681	270.02	0.336463	0.920024	0.154135	1.11275	2796
EHI_035090	10518.9	13152.9	12530.2	13087.1	13687.4	13509.4	0.338288	0.920552	0.154022	1.11267	2812
EHI_027620	104.08	108.808	107.964	106.705	133.191	118.134	0.382138	0.938063	0.153959	1.11262	3118
EHI_143580	625.833	477.29	509.888	556.266	680.647	555.041	0.383749	0.938375	0.15393	1.1126	3128
EHI_088230	919.149	719.593	848.745	927.985	968.576	868.189	0.35861	0.930992	0.153873	1.11255	2944
EHI_027670	93.2666	125.266	95.1364	125.072	117.522	108.758	0.415635	0.947977	0.153783	1.11248	3355
EHI_039040	386.583	443.459	509.888	497.666	515.137	480.035	0.340931	0.922371	0.153756	1.11246	2828
EHI_051790	314.944	238.645	230.893	322.739	296.743	249.393	0.392508	0.939419	0.153653	1.11238	3196
EHI_179880	59.4744	56.6897	81.2401	52.4779	87.162	80.6309	0.557254	0.984424	0.153516	1.11228	4331
EHI_192050	1819.38	2009.74	1814.01	2210.2	1954.78	2112.34	0.332442	0.918226	0.153445	1.11222	2766
EHI_152670	974.569	779.94	840.193	1042.56	846.157	993.823	0.368781	0.932184	0.15337	1.11216	3028
EHI_170010	531.214	588.841	547.302	629.735	597.403	628.171	0.325731	0.918226	0.153119	1.11197	2706
EHI_010520	301.427	365.74	289.685	341.107	340.813	384.403	0.332512	0.918226	0.153006	1.11188	2768
EHI_025890	579.875	484.605	475.682	580.756	602.299	526.914	0.353396	0.930856	0.152976	1.11186	2905
EHI_179800	24.3304	37.4883	27.7927	30.6121	34.2772	36.5652	0.6234	0.99492	0.152941	1.11183	4787
EHI_103790	66.2328	67.6618	82.309	90.9617	73.4511	75.9431	0.477282	0.967868	0.152871	1.11178	3774
EHI_023210	141.927	127.095	142.17	121.574	170.407	165.012	0.41623	0.947977	0.15281	1.11173	3357
EHI_014110	13199.3	12933.5	13966.9	15461.7	14460.1	14653.3	0.32137	0.917059	0.152659	1.11162	2681
EHI_178880	590.689	526.665	564.405	649.852	615.031	602.857	0.332768	0.918226	0.15262	1.11159	2771
EHI_155550	2027.54	1830.53	1952.97	2230.31	2106.58	2120.78	0.329707	0.918226	0.152557	1.11154	2740
EHI_126080	78.398	93.2636	84.4469	92.711	100.873	92.8193	0.421687	0.950097	0.152509	1.1115	3391
EHI_189480	78.398	78.634	56.6543	69.0959	81.2859	87.1939	0.509231	0.974958	0.152509	1.1115	3979
EHI_192830	110.839	109.722	97.2743	111.953	114.584	126.572	0.396808	0.943805	0.152425	1.11144	3218
EHI_124870	358.198	492.834	351.684	463.555	434.831	441.595	0.371624	0.933257	0.152386	1.11141	3046
EHI_186470	94.6183	180.127	118.653	172.303	140.047	128.447	0.491437	0.971719	0.152357	1.11138	3870
EHI_035240	5.40676	5.4861	3.20685	8.74632	2.93805	3.75028	1	1	0.152306	1.11134	7396
EHI_153170	148.686	96.0067	126.136	128.571	125.357	154.699	0.47041	0.964252	0.15212	1.1112	3734
EHI_179090	168.961	135.324	214.859	138.192	212.519	225.954	0.494677	0.974486	0.152102	1.11119	3885
EHI_010600	174.368	208.472	183.859	211.661	203.704	216.578	0.33246	0.918226	0.1521	1.11119	2767
EHI_163540	5155.35	5340.71	4805.99	5615.14	5554.86	5830.74	0.330465	0.918226	0.151848	1.11099	2747
EHI_099740	300.075	311.793	288.616	339.357	341.793	319.711	0.298369	0.900514	0.151759	1.11092	2536
EHI_069380	560.951	714.107	686.265	738.19	722.759	720.991	0.351154	0.930333	0.151749	1.11092	2889
[truncated: 5,656 more rows]
