# Supplementary material for: Dual Role of Entamoeba histolytica KERP2 in Regulating Gene Expression and Modulating Host Cell Function for Intestinal Colonization
Source: Research Square preprint supplement (doi:10.21203/rs.3.rs-6191032/v1), 2025-04-28
Supplement: Supplementary file 3 [file 81c244824897a52a66483afa.xlsx]

## Sheet: Sheet1
Table S1. Primer list
Primer name	Sequence	Direction	Usage
XmaI-KERP2	CAACCCGGGATGTCTACATTAGCTGAAAGAAG	Forward	Construction of pEhEx-HA-KERP2
KERP2-XhoI	CCCTCGAGTTATTTCTTTCCTTTTGTTTTAGCCTC	Reverse	Construction of pEhEx-HA-KERP2
HA-KERP2∆185−239-F	TAACTCGAGTTGAACTCTTCTTTTTTAAACTT	Forward	Construction of pEhEx-HA-KERP2∆185−239
HA-KERP2∆185−239-R	TTTTTTTTCTTTCTTTTCTTTTGTACTTTGCTTTT	Reverse	Construction of pEhEx-HA-KERP2∆185−239
BglII-GFP-F	CACAGATCTATGAGTAAAGGAGAAGAACTTTTC	Forward	Amplification of GFP
GFP-BglII-R	CACAGATCTTTTGTATAGTTCATCCATGCCA	Reverse	Amplification of GFP
OligoDNA-HA	TCAGGTACCATGTATCCATATGATGTTCCAGATTATGCTTATCCATATGATGTTCCAGATTATGCTTATCCATATGATGTTCCAGATTATCCCGGGTAAGGATCCTAA		Construction of pEhHYG-tetR-O-Cass-HA
StuI-KERP2	GGAGGCCTATGTCTACATTAGCTGAAAGAAG	Forward	Construction of psAP-KERP2gs
KERP2-420bp-SacI	GCCGAGCTCAAATTCAACTATTTCTTCTGCATAC	Reverse	Construction of psAP-KERP2gs
In fusion_GFP-KERP2-pET151-F	TTTTCAGGGAGGATCCAGTAAAGGAGAAGAACTTTTCACTG	Forward	Construction of pET151-GFP-KERP2
In fusion_GFP-KERP2-pET151-R	TAGCAGCCGGATCTGCTCGAGTTATTTCTTTCCTTTTGTT	Reverse	Construction of pET151-GFP-KERP2
GA linker-XmaI-up	CCGGAGCTGGAGCAGGAGCTGGAGCAGGAGCTC		Inserting GA linker in pET151-GFP-KERP2
GA linker-XmaI-down	CCGGGAGCTCCTGCTCCAGCTCCTGCTCCAGCT		Inserting GA linker in pET151-GFP-KERP2
pET151-GFP-F	cttctcgagcagatccggc	Forward	Construction of pET151-GFP
pET151-GFP-R	ctgctcgagttaTCCGGGTTTGTATAGTTCATCC	Reverse	Construction of pET151-GFP
CS+25	GTAATTATTTAAAGGTTGGTC	Forward	Sequencing for pEhEx constructs
CS-30	GTGACTTTTTATTTAAAAAAAAC	Reverse	Sequencing for pEhEx constructs
tet-O-F	TTTAAATCCCTATCAGTGATAGAGAAATTCA	Forward	Sequencing for pEhHYG-tetR-O-Cass constructs
pET151-Seq-F	CCGCGAAATTAATACGACTCACTATAGGG	Forward	Sequencing for pET151 constructs
pET151-Seq-R	GTTTAGAGGCCCCAAGGGG	Reverse	Sequencing for pET151 constructs
KERP2-249-216	TTTAAATGACATAATATCTTTTTTTCTTTCTTC	Reverse	Sequencing for pET151-GFP-KERP2
psAP-F	GTGGTGTTTCAGACGT	Forward	Sequencing for psAP-KERP2gs
psAP-R	ACACTTTATGCTTCCG	Reverse	Sequencing for psAP-KERP2gs
KERP2gs-F	AGCCTTAAAGGAAATTCCAGAAATTG	Forward	Gene silencing confirmation
KERP2gs-R	TTGAGCTACTTCTTTTTTTAACGATT	Reverse	Gene silencing confirmation
RNApolII_F	GATCCAACATATCCTAAAACAACA	Forward	Gene silencing confirmation
RNApolII_R	TCAATTATTTTCTGACCCGTCTTC	Reverse	Gene silencing confirmation
