# Supplementary material for: Dual Role of Entamoeba histolytica KERP2 in Regulating Gene Expression and Modulating Host Cell Function for Intestinal Colonization
Source: Research Square preprint supplement (doi:10.21203/rs.3.rs-6191032/v1), 2025-04-28
Supplement: Supplementary file 4 [file dbafdaade96d39c343a8587a.xlsx]

## Sheet: Trial 1
Table S3. E. histolytica HA-KERP2 co-IP proteome
Trial 1
Identified Proteins (1080)	Accession Number	Alternate ID	Molecular Weight	HAKERP2-cytosol (1A)	HAKERP2∆185−239 -cytosol (1B)	HAmock-cytosol (1C)	HAKERP2-nucleus (1D)	HAKERP2∆185−239-nucleus (1E)	HAmock-nucleus (1F)
Myosin heavy chain OS=Entamoeba histolytica HM-1:IMSS OX=294381 GN=EHI_110180 PE=3 SV=1	C4LU72 (+2)	EHI_110180	247 kDa	135.99	96.685	38.916	28.006	25.073	46.048
Actin OS=Entamoeba histolytica HM-1:IMSS OX=294381 GN=EHI_107290 PE=3 SV=1	B1N2P0	EHI_107290	42 kDa	64.415	35.912	29.935	14.314	11.462	12.152
Nuclear pore protein, putative OS=Entamoeba histolytica HM-1:IMSS OX=294381 GN=EHI_183510 PE=3 SV=1	C4M730 (+2)	EHI_183510	186 kDa	0	0	0	11.825	15.044	12.791
Interaptin, putative OS=Entamoeba histolytica HM-1:IMSS OX=294381 GN=EHI_148910 PE=4 SV=1	C4LT58 (+2)	EHI_148910	135 kDa	0	0	0	7.4684	7.8801	7.6747
Myosin heavy chain OS=Entamoeba histolytica HM-1:IMSS OX=294381 GN=EHI_140720 PE=4 SV=1	C4M3P4 (+2)	EHI_140720	152 kDa	0	5.5249	0	13.692	15.044	22.384
Aldehyde-alcohol dehydrogenase OS=Entamoeba histolytica HM-1:IMSS OX=294381 GN=EHI_150490 PE=3 SV=1	C4M230 (+1)	EHI_150490	96 kDa	35.786	24.862	20.955	5.6013	5.731	8.3142
Axoneme-associated protein mst101 OS=Entamoeba histolytica HM-1:IMSS OX=294381 GN=EHI_160980 PE=4 SV=1	C4M2R6 (+2)	EHI_160980	34 kDa	14.314	5.5249	14.968	4.9789	5.0146	5.756
Pyruvate phosphate dikinase OS=Entamoeba histolytica HM-1:IMSS OX=294381 GN=EHI_009530 PE=4 SV=1	A0A8U0WP38 (+2)	EHI_009530	98 kDa	28.629	22.099	20.955	4.9789	2.8655	1.9187
DUF4200 domain-containing protein OS=Entamoeba histolytica HM-1:IMSS OX=294381 GN=EHI_008020 PE=4 SV=1	C4LYD8 (+2)	EHI_008020	99 kDa	0	0	0	9.3355	7.1637	8.9538
Galactose-specific adhesin 170kD subunit OS=Entamoeba histolytica HM-1:IMSS OX=294381 GN=EHI_077500 PE=4 SV=1	C4M8N3	EHI_077500	145 kDa	0	2.7624	0	4.9789	10.029	7.6747
Peroxiredoxin, putative OS=Entamoeba histolytica HM-1:IMSS OX=294381 GN=EHI_122310 PE=3 SV=1	C4MBP3	EHI_122310	27 kDa	35.786	13.812	20.955	1.8671	1.4327	2.5582
Clathrin heavy chain OS=Entamoeba histolytica HM-1:IMSS-B OX=885319 GN=EHI8A_063050 PE=3 SV=1	M3TXX7 (+1)	EHI8A_063050	193 kDa	0	11.05	14.968	7.4684	8.5965	7.6747
Serine-threonine rich protein OS=Entamoeba histolytica HM-1:IMSS OX=294381 GN=EHI_095870 PE=4 SV=1	C4M3E4 (+2)	EHI_095870	104 kDa	0	0	0	6.846	8.5965	8.3142
Adenylyl cyclase-associated protein OS=Entamoeba histolytica HM-1:IMSS OX=294381 GN=EHI_136150 PE=3 SV=1	C4M295	EHI_136150	53 kDa	0	2.7624	2.9935	7.4684	6.4473	10.233
Heat shock protein 70, putative OS=Entamoeba histolytica HM-1:IMSS OX=294381 GN=EHI_052860 PE=3 SV=1	C4M3S5	EHI_052860	72 kDa	14.314	13.812	2.9935	3.1118	5.0146	2.5582
Gal/GalNAc lectin heavy subunit OS=Entamoeba histolytica HM-1:IMSS OX=294381 GN=EHI_012270 PE=4 SV=1	C4LTM0	EHI_012270	144 kDa	0	0	0	3.1118	5.731	4.4769
Elongation factor 1-alpha OS=Entamoeba histolytica HM-1:IMSS OX=294381 GN=EHI_052400 PE=2 SV=1	C4MAC9	EHI_052400	48 kDa	0	0	0	0	0	0
Elongation factor 1-alpha OS=Entamoeba histolytica HM-1:IMSS OX=294381 GN=EHI_011210 PE=3 SV=1	C4M7D4	EHI_011210	48 kDa	21.472	11.05	14.968	0.62236	0.71637	1.2791
Protein serine/threonine kinase OS=Entamoeba histolytica HM-1:IMSS OX=294381 GN=EHI_098510 PE=4 SV=1	C4LXD1	EHI_098510	188 kDa	0	0	0	3.7342	4.2982	9.5933
GRIP domain-containing protein OS=Entamoeba histolytica HM-1:IMSS OX=294381 GN=EHI_152940 PE=4 SV=1	C4LS87 (+2)	EHI_152940	124 kDa	0	0	0	4.3566	2.1491	6.3955
Serine-threonine-isoleucine rich protein, putative OS=Entamoeba histolytica HM-1:IMSS OX=294381 GN=EHI_012330 PE=4 SV=1	C4LTM6	EHI_012330	291 kDa	0	0	0	3.7342	7.8801	8.9538
Epsin-2 OS=Entamoeba histolytica HM-1:IMSS OX=294381 GN=EHI_145610 PE=4 SV=1	B1N3Z3	EHI_145610	80 kDa	0	0	0	5.6013	7.1637	7.6747
Serine-threonine-isoleucine rich protein, putative OS=Entamoeba histolytica HM-1:IMSS OX=294381 GN=EHI_025700 PE=4 SV=1	C4MAX8	EHI_025700	288 kDa	0	0	0	4.9789	8.5965	10.233
Galactose-specific adhesin 170kD subunit, putative OS=Entamoeba histolytica HM-1:IMSS OX=294381 GN=EHI_042370 PE=4 SV=1	B1N559	EHI_042370	143 kDa	0	0	0	0	0	0
Glutamic acid-rich protein, putative OS=Entamoeba histolytica HM-1:IMSS OX=294381 GN=EHI_082590 PE=4 SV=1	C4M6A8	EHI_082590	121 kDa	0	0	0	6.2236	5.0146	5.1164
Uncharacterized protein OS=Entamoeba histolytica HM-1:IMSS OX=294381 GN=EHI_145970 PE=4 SV=1	C4M3Q2	EHI_145970	166 kDa	0	0	0	7.4684	10.746	6.3955
70 kDa heat shock protein, putative OS=Entamoeba histolytica HM-1:IMSS OX=294381 GN=EHI_199590 PE=3 SV=1	C4M770 (+2)	EHI_199590	73 kDa	0	2.7624	0	2.4895	2.8655	0
Galactose-inhibitable lectin 35 kDa subunit OS=Entamoeba histolytica HM-1:IMSS OX=294381 GN=EHI_035690 PE=4 SV=1	C4LXZ9 (+1)	EHI_035690	34 kDa	0	0	0	4.3566	6.4473	5.756
Gal/GalNAc lectin light subunit OS=Entamoeba histolytica HM-1:IMSS OX=294381 GN=EHI_148790 PE=4 SV=1	C4LT47 (+2)	EHI_148790	32 kDa	0	0	0	6.846	6.4473	6.3955
Galactose-specific adhesin light subunit, putative OS=Entamoeba histolytica HM-1:IMSS OX=294381 GN=EHI_049690 PE=4 SV=1	B1N2L3 (+1)	EHI_049690	34 kDa	0	0	0	3.7342	4.2982	5.1164
DNA topoisomerase II, putative OS=Entamoeba histolytica HM-1:IMSS OX=294381 GN=EHI_120640 PE=4 SV=1	A0A8U0WPS2 (+2)	EHI_120640	155 kDa	0	0	0	5.6013	2.1491	1.9187
PIWI, putative OS=Entamoeba histolytica HM-1:IMSS OX=294381 GN=EHI_125650 PE=3 SV=1	C4LVV2 (+1)	EHI_125650	110 kDa	0	2.7624	8.9805	0.62236	2.8655	1.2791
Pyruvate:ferredoxin oxidoreductase OS=Entamoeba histolytica HM-1:IMSS OX=294381 GN=EHI_051060 PE=4 SV=1	C4LTX6 (+1)	EHI_051060	128 kDa	28.629	16.575	17.961	3.7342	2.8655	2.5582
Unconventional myosin IB OS=Entamoeba histolytica HM-1:IMSS OX=294381 GN=EHI_110810 PE=1 SV=1	C4LUC7 (+2)	EHI_110810	119 kDa	0	2.7624	0	8.7131	6.4473	7.0351
TNase-like domain-containing protein OS=Entamoeba histolytica HM-1:IMSS OX=294381 GN=EHI_005150 PE=4 SV=1	C4M0A8 (+2)	EHI_005150	99 kDa	0	5.5249	8.9805	3.1118	3.5819	0.63955
EF-hand calcium-binding domain containing protein OS=Entamoeba histolytica HM-1:IMSS OX=294381 GN=EHI_060740 PE=1 SV=1	C4MBE2 (+2)	EHI_060740	27 kDa	0	0	0	3.1118	1.4327	2.5582
Uncharacterized protein OS=Entamoeba histolytica HM-1:IMSS OX=294381 GN=EHI_169970 PE=4 SV=1	C4M1B9 (+2)	EHI_169970	43 kDa	0	0	0	2.4895	4.2982	3.8373
40S ribosomal protein S2, putative OS=Entamoeba histolytica HM-1:IMSS OX=294381 GN=EHI_020280 PE=3 SV=1	C4M7U0 (+2)	EHI_020280	28 kDa	0	5.5249	2.9935	3.1118	2.8655	1.2791
GRIP domain-containing protein OS=Entamoeba histolytica HM-1:IMSS OX=294381 GN=EHI_131060 PE=4 SV=1	C4LXH4 (+2)	EHI_131060	64 kDa	0	0	0	3.7342	2.8655	2.5582
Serine-threonine-isoleucine rich protein, putative OS=Entamoeba histolytica HM-1:IMSS OX=294381 GN=EHI_004340 PE=4 SV=1	B1N330	EHI_004340	260 kDa	0	0	0	0	6.4473	8.9538
Glyceraldehyde-3-phosphate dehydrogenase OS=Entamoeba histolytica HM-1:IMSS OX=294381 GN=EHI_008200 PE=3 SV=1	C4LVR9	EHI_008200	36 kDa	7.1572	11.05	8.9805	2.4895	5.0146	3.1978
Uncharacterized protein OS=Entamoeba histolytica HM-1:IMSS OX=294381 GN=EHI_177420 PE=4 SV=1	C4LY45	EHI_177420	53 kDa	0	0	0	5.6013	0	6.3955
Actin-like protein, putative OS=Entamoeba histolytica HM-1:IMSS OX=294381 GN=EHI_111050 PE=3 SV=1	C4M5I6 (+2)	EHI_111050	45 kDa	0	2.7624	0	4.3566	2.8655	3.1978
Galactose-inhibitable lectin, putative OS=Entamoeba histolytica HM-1:IMSS OX=294381 GN=EHI_058330 PE=4 SV=1	C4M5G9 (+2)	EHI_058330	32 kDa	0	0	0	5.6013	6.4473	6.3955
RanBD1 domain-containing protein OS=Entamoeba histolytica HM-1:IMSS OX=294381 GN=EHI_085060 PE=4 SV=1	C4M1L6 (+2)	EHI_085060	77 kDa	0	0	0	4.3566	5.0146	3.8373
NAD(P) transhydrogenase subunit alpha, putative OS=Entamoeba histolytica HM-1:IMSS OX=294381 GN=EHI_014030 PE=4 SV=1	A0A8U0WPM4	EHI_014030	118 kDa	0	0	2.9935	5.6013	5.0146	3.8373
Dot/Icm system substrate protein LidA OS=Entamoeba histolytica HM-1:IMSS OX=294381 GN=EHI_083620 PE=4 SV=1	C4M946 (+2)	EHI_083620	185 kDa	0	2.7624	5.987	0.62236	7.1637	10.872
60S ribosomal protein L7a OS=Entamoeba histolytica HM-1:IMSS OX=294381 GN=EHI_029530 PE=3 SV=1	B1N3R9 (+1)	EHI_029530	32 kDa	0	2.7624	14.968	1.8671	2.1491	0
DNA double-strand break repair Rad50 ATPase OS=Entamoeba histolytica HM-1:IMSS OX=294381 GN=EHI_022130 PE=4 SV=1	C4MAT9 (+2)	EHI_022130	71 kDa	0	0	0	3.1118	2.8655	2.5582
G protein alpha subunit, putative OS=Entamoeba histolytica HM-1:IMSS OX=294381 GN=EHI_140350 PE=1 SV=1	C4M483 (+2)	EHI_140350	40 kDa	0	0	0	4.3566	7.1637	5.1164
Leucine rich repeats family protein OS=Entamoeba histolytica HM-1:IMSS OX=294381 GN=EHI_140310 PE=4 SV=1	C4M479 (+2)	EHI_140310	76 kDa	0	0	0	3.1118	5.0146	1.9187
40S ribosomal protein SA OS=Entamoeba histolytica HM-1:IMSS OX=294381 GN=EHI_081410 PE=3 SV=1	C4M5A0 (+2)	EHI_081410	29 kDa	21.472	24.862	20.955	3.7342	4.2982	3.8373
CNH domain-containing protein OS=Entamoeba histolytica HM-1:IMSS OX=294381 GN=EHI_035980 PE=4 SV=1	C4M7F7 (+2)	EHI_035980	103 kDa	0	0	0	3.1118	3.5819	3.1978
Grainin 1 OS=Entamoeba histolytica HM-1:IMSS OX=294381 GN=EHI_167300 PE=4 SV=1	C4MAF9 (+2)	EHI_167300	24 kDa	35.786	13.812	5.987	1.8671	1.4327	0.63955
Actin-related protein 2/3 complex subunit OS=Entamoeba histolytica HM-1:IMSS OX=294381 GN=EHI_045000 PE=3 SV=1	C4LTB5 (+1)	EHI_045000	40 kDa	0	5.5249	2.9935	4.3566	2.8655	3.8373
Saposin B-type domain-containing protein OS=Entamoeba histolytica HM-1:IMSS OX=294381 GN=EHI_096370 PE=4 SV=1	C4LWF0 (+2)	EHI_096370	115 kDa	0	0	0	1.2447	2.8655	3.1978
Grainin 2 OS=Entamoeba histolytica HM-1:IMSS OX=294381 GN=EHI_167310 PE=4 SV=1	A0A8U0WPU5 (+2)	EHI_167310	24 kDa	35.786	13.812	0	3.7342	3.5819	1.2791
40S ribosomal protein S6 OS=Entamoeba histolytica HM-1:IMSS OX=294381 GN=EHI_013890 PE=3 SV=1	C4LXN2	EHI_013890	30 kDa	0	0	0	4.3566	2.1491	0
60S ribosomal protein L4, putative OS=Entamoeba histolytica HM-1:IMSS OX=294381 GN=EHI_000510 PE=3 SV=1	C4LZA2	EHI_000510	47 kDa	0	5.5249	8.9805	1.8671	1.4327	1.2791
4-alpha-glucanotransferase OS=Entamoeba histolytica HM-1:IMSS OX=294381 GN=EHI_148560 PE=3 SV=1	C4LT26 (+2)	EHI_148560	103 kDa	0	0	0	3.1118	5.731	5.1164
40S ribosomal protein S3a OS=Entamoeba histolytica HM-1:IMSS OX=294381 GN=EHI_065270 PE=3 SV=1	C4M609	EHI_065270	29 kDa	0	5.5249	8.9805	3.7342	3.5819	1.9187
DNA double-strand break repair Rad50 ATPase OS=Entamoeba histolytica HM-1:IMSS OX=294381 GN=EHI_194550 PE=4 SV=1	C4LZW6	EHI_194550	40 kDa	0	0	0	0.62236	2.8655	2.5582
Actinin-like protein, putative OS=Entamoeba histolytica HM-1:IMSS OX=294381 GN=EHI_164430 PE=4 SV=1	C4M1S5 (+1)	EHI_164430	54 kDa	0	11.05	5.987	2.4895	2.8655	1.9187
Nucleolar protein Nop56, putative OS=Entamoeba histolytica HM-1:IMSS OX=294381 GN=EHI_122740 PE=3 SV=1	C4M5N2 (+2)	EHI_122740	52 kDa	0	0	0	3.1118	1.4327	1.2791
Phosphopyruvate hydratase OS=Entamoeba histolytica HM-1:IMSS OX=294381 GN=EHI_130700 PE=3 SV=1	C4LXE8 (+2)	EHI_130700	47 kDa	14.314	13.812	14.968	3.1118	2.1491	1.2791
Helicase C-terminal domain-containing protein OS=Entamoeba histolytica HM-1:IMSS OX=294381 GN=EHI_031370 PE=4 SV=1	C4M4L4 (+2)	EHI_031370	118 kDa	0	0	0	5.6013	4.2982	0.63955
60S ribosomal protein L3, putative OS=Entamoeba histolytica HM-1:IMSS OX=294381 GN=EHI_005890 PE=3 SV=1	C4LW09	EHI_005890	46 kDa	0	13.812	8.9805	0.62236	0.71637	0
Uncharacterized protein OS=Entamoeba histolytica HM-1:IMSS OX=294381 GN=EHI_146110 PE=4 SV=1	C4M3Q5 (+2)	EHI_146110	43 kDa	7.1572	2.7624	0	3.7342	2.8655	3.8373
40S ribosomal protein S7 OS=Entamoeba histolytica HM-1:IMSS OX=294381 GN=EHI_067530 PE=3 SV=1	C4M9F9 (+2)	EHI_067530	22 kDa	7.1572	0	5.987	3.1118	2.1491	0.63955
Heat shock protein 70, putative OS=Entamoeba histolytica HM-1:IMSS OX=294381 GN=EHI_188610 PE=3 SV=1	B1N486 (+1)	EHI_188610	71 kDa	0	0	0	0	0	0
DNA double-strand break repair Rad50 ATPase OS=Entamoeba histolytica HM-1:IMSS OX=294381 GN=EHI_188170 PE=4 SV=1	C4M191	EHI_188170	36 kDa	0	0	0	0.62236	2.8655	2.5582
40S ribosomal protein S8 OS=Entamoeba histolytica HM-1:IMSS OX=294381 GN=EHI_009870 PE=3 SV=1	C4M0Q2	EHI_009870	27 kDa	7.1572	5.5249	8.9805	3.7342	0.71637	1.2791
Fructose-1,6-bisphosphate aldolase, putative OS=Entamoeba histolytica HM-1:IMSS OX=294381 GN=EHI_098570 PE=4 SV=1	C4LXD7	EHI_098570	36 kDa	7.1572	5.5249	14.968	3.1118	1.4327	0.63955
DNA-directed RNA polymerase subunit OS=Entamoeba histolytica HM-1:IMSS-B OX=885319 GN=EHI8A_079580 PE=3 SV=1	M3TGJ8	EHI8A_079580	178 kDa	0	0	0	3.7342	2.1491	1.9187
BRCT domain-containing protein OS=Entamoeba histolytica HM-1:IMSS OX=294381 GN=EHI_004350 PE=4 SV=1	C4LYP8 (+2)	EHI_004350	63 kDa	0	0	0	3.7342	5.0146	2.5582
E3 ubiquitin protein ligase OS=Entamoeba histolytica HM-1:IMSS OX=294381 GN=EHI_059690 PE=4 SV=1	C4M339 (+2)	EHI_059690	106 kDa	0	0	0	1.2447	0.71637	0.63955
Nuclease OS=Entamoeba histolytica HM-1:IMSS OX=294381 GN=EHI_101240 PE=4 SV=1	C4M8B5 (+2)	EHI_101240	96 kDa	0	5.5249	8.9805	1.2447	1.4327	0.63955
40S ribosomal protein S3a OS=Entamoeba histolytica HM-1:IMSS OX=294381 GN=EHI_050280 PE=3 SV=1	C4LTQ5	EHI_050280	29 kDa	0	0	0	0	0	0
14-3-3 protein 2 OS=Entamoeba histolytica HM-1:IMSS OX=294381 GN=EHI_098280 PE=3 SV=1	C4LXB1 (+2)	EHI_098280	28 kDa	0	13.812	5.987	1.8671	1.4327	0.63955
V-type ATPase, B subunit, putative OS=Entamoeba histolytica HM-1:IMSS OX=294381 GN=EHI_189850 PE=3 SV=1	A0A8U0WP39 (+2)	EHI_189850	55 kDa	0	0	0	1.2447	2.8655	1.9187
Acetyl-CoA synthetase, putative OS=Entamoeba histolytica HM-1:IMSS OX=294381 GN=EHI_178960 PE=4 SV=1	C4LUV9 (+2)	EHI_178960	77 kDa	21.472	8.2873	5.987	0	0	0
Calmodulin, putative OS=Entamoeba histolytica HM-1:IMSS OX=294381 GN=EHI_023500 PE=4 SV=1	C4LUQ9 (+2)	EHI_023500	17 kDa	0	5.5249	0	3.7342	2.1491	2.5582
40S ribosomal protein S4, putative OS=Entamoeba histolytica HM-1:IMSS OX=294381 GN=EHI_118170 PE=3 SV=1	B1N336 (+1)	EHI_118170	36 kDa	0	2.7624	0	2.4895	0	0
60S ribosomal protein L9, putative OS=Entamoeba histolytica HM-1:IMSS OX=294381 GN=EHI_126140 PE=3 SV=1	C4LVZ9	EHI_126140	22 kDa	0	2.7624	5.987	1.8671	2.1491	0.63955
BRO1 domain-containing protein OS=Entamoeba histolytica HM-1:IMSS OX=294381 GN=EHI_167710 PE=4 SV=1	C4M7Z2 (+2)	EHI_167710	104 kDa	0	0	0	3.1118	2.1491	2.5582
Villidin, putative OS=Entamoeba histolytica HM-1:IMSS OX=294381 GN=EHI_021270 PE=4 SV=1	C4M042 (+2)	EHI_021270	170 kDa	0	0	0	3.7342	2.8655	4.4769
60S ribosomal protein L27 OS=Entamoeba histolytica HM-1:IMSS OX=294381 GN=EHI_183480 PE=3 SV=1	C4M727 (+2)	EHI_183480	16 kDa	7.1572	8.2873	8.9805	3.1118	2.1491	1.9187
KERP2-1-164 Truncated DEK_C domain-containing protein OS=Entamoeba histolytica HM-1:IMSS OX=294381 GN=EHI_065630 PE=4 SV=1	1C4LZX9 (+3)	EHI_065630	21 kDa	14.314	19.337	0	1.8671	1.4327	0
Nucleosome assembly protein, putative OS=Entamoeba histolytica HM-1:IMSS OX=294381 GN=EHI_072030 PE=3 SV=1	C4M608 (+2)	EHI_072030	28 kDa	21.472	5.5249	8.9805	0	0	0
60S ribosomal protein L5, putative OS=Entamoeba histolytica HM-1:IMSS OX=294381 GN=EHI_006860 PE=3 SV=1	C4LU56	EHI_006860	32 kDa	21.472	13.812	8.9805	4.3566	0.71637	2.5582
Plastin-2, putative OS=Entamoeba histolytica HM-1:IMSS-B OX=885319 GN=EHI8A_186020 PE=4 SV=1	M3TGQ4	EHI8A_186020	111 kDa	0	0	0	3.1118	2.8655	6.3955
Gal/GalNAc lectin subunit Igl2 OS=Entamoeba histolytica HM-1:IMSS OX=294381 GN=EHI_065330 PE=4 SV=1	C4M6L0	EHI_065330	120 kDa	0	8.2873	0	1.8671	2.1491	2.5582
Fibrillarin, putative OS=Entamoeba histolytica HM-1:IMSS OX=294381 GN=EHI_118840 PE=3 SV=1	C4LYN2 (+2)	EHI_118840	32 kDa	0	0	0	3.1118	2.1491	1.9187
ELMO domain-containing protein OS=Entamoeba histolytica HM-1:IMSS OX=294381 GN=EHI_098830 PE=4 SV=1	C4M876 (+2)	EHI_098830	161 kDa	0	0	0	0	0.71637	1.9187
FHA domain-containing protein OS=Entamoeba histolytica HM-1:IMSS OX=294381 GN=EHI_129340 PE=4 SV=1	C4M9W7 (+1)	EHI_129340	65 kDa	0	0	0	2.4895	2.1491	0.63955
Fimbrin OS=Entamoeba histolytica HM-1:IMSS OX=294381 GN=EHI_154330 PE=4 SV=1	C4M596 (+1)	EHI_154330	111 kDa	0	0	0	2.4895	2.1491	6.3955
40S ribosomal protein S3, putative OS=Entamoeba histolytica HM-1:IMSS OX=294381 GN=EHI_146340 PE=3 SV=1	C4LT02	EHI_146340	27 kDa	7.1572	5.5249	2.9935	0.62236	0.71637	0.63955
Actin-related protein 2/3 complex subunit 4 OS=Entamoeba histolytica HM-1:IMSS OX=294381 GN=EHI_030820 PE=3 SV=1	C4LSV0	EHI_030820	22 kDa	0	0	0	3.7342	5.0146	3.8373
Uncharacterized protein OS=Entamoeba histolytica HM-1:IMSS OX=294381 GN=EHI_175270 PE=4 SV=1	C4M3A6 (+2)	EHI_175270	50 kDa	21.472	5.5249	5.987	2.4895	2.1491	2.5582
40S ribosomal protein S17, putative OS=Entamoeba histolytica HM-1:IMSS OX=294381 GN=EHI_135060 PE=3 SV=1	C4M0Z2 (+2)	EHI_135060	14 kDa	21.472	13.812	14.968	1.2447	1.4327	0.63955
Alpha-1,4 glucan phosphorylase OS=Entamoeba histolytica HM-1:IMSS OX=294381 GN=EHI_096830 PE=3 SV=1	C4LWJ2 (+1)	EHI_096830	102 kDa	0	0	0	2.4895	2.1491	1.9187
Ras family GTPase OS=Entamoeba histolytica HM-1:IMSS OX=294381 GN=EHI_058090 PE=3 SV=1	C4M8B0 (+2)	EHI_058090	21 kDa	0	0	2.9935	3.1118	2.1491	3.1978
Alcohol dehydrogenase, putative OS=Entamoeba histolytica HM-1:IMSS OX=294381 GN=EHI_198760 PE=3 SV=1	C4LWS2 (+1)	EHI_198760	43 kDa	7.1572	8.2873	8.9805	2.4895	1.4327	0
Calmodulin, putative OS=Entamoeba histolytica HM-1:IMSS OX=294381 GN=EHI_148890 PE=4 SV=1	C4LT56 (+1)	EHI_148890	17 kDa	0	2.7624	0	1.2447	2.1491	2.5582
Actin, putative OS=Entamoeba histolytica HM-1:IMSS OX=294381 GN=EHI_008780 PE=3 SV=1	C4M0P2 (+2)	EHI_008780	85 kDa	0	0	0	0.62236	1.4327	1.2791
60S ribosomal protein L18a OS=Entamoeba histolytica HM-1:IMSS OX=294381 GN=EHI_035600 PE=3 SV=1	C4LXZ0	EHI_035600	20 kDa	0	5.5249	8.9805	3.1118	1.4327	0.63955
rRNA biogenesis protein RRP5, putative OS=Entamoeba histolytica HM-1:IMSS OX=294381 GN=EHI_077270 PE=4 SV=1	C4M2T6	EHI_077270	198 kDa	0	0	0	1.2447	1.4327	0.63955
Uncharacterized protein OS=Entamoeba histolytica HM-1:IMSS OX=294381 GN=EHI_190870 PE=4 SV=1	C4M9U9 (+2)	EHI_190870	47 kDa	0	0	0	1.2447	0.71637	0
14-3-3 protein 3 OS=Entamoeba histolytica HM-1:IMSS OX=294381 GN=EHI_006810 PE=3 SV=1	C4M0F4 (+2)	EHI_006810	28 kDa	0	5.5249	5.987	1.2447	0	0
SnoRNA binding protein, putative OS=Entamoeba histolytica HM-1:IMSS OX=294381 GN=EHI_183900 PE=3 SV=1	C4MAW3 (+1)	EHI_183900	57 kDa	0	0	2.9935	1.2447	2.1491	2.5582
Immuno-dominant variable surface antigen OS=Entamoeba histolytica HM-1:IMSS OX=294381 GN=EHI_015380 PE=4 SV=1	C4M0X6 (+2)	EHI_015380	125 kDa	0	0	0	0.62236	2.1491	3.8373
F-actin-capping protein subunit alpha OS=Entamoeba histolytica HM-1:IMSS OX=294381 GN=EHI_033740 PE=3 SV=1	C4M3N6	EHI_033740	31 kDa	0	2.7624	2.9935	2.4895	2.8655	1.2791
60S ribosomal protein L6, putative OS=Entamoeba histolytica HM-1:IMSS OX=294381 GN=EHI_045300 PE=3 SV=1	C4LTE3	EHI_045300	23 kDa	0	5.5249	8.9805	2.4895	0.71637	1.9187
Type A flavoprotein, putative OS=Entamoeba histolytica HM-1:IMSS OX=294381 GN=EHI_096710 PE=4 SV=1	B1N2F9 (+1)	EHI_096710	46 kDa	0	2.7624	0	0.62236	0	0.63955
40S ribosomal protein S9, putative OS=Entamoeba histolytica HM-1:IMSS OX=294381 GN=EHI_179000 PE=3 SV=1	C4LUW3	EHI_179000	21 kDa	0	0	0	2.4895	2.1491	1.2791
Ubiquitin, putative OS=Entamoeba histolytica HM-1:IMSS OX=294381 GN=EHI_083270 PE=1 SV=1	C4M760 (+2)	EHI_083270	9 kDa	0	2.7624	0	1.8671	1.4327	1.9187
Skp1 protein, putative OS=Entamoeba histolytica HM-1:IMSS OX=294381 GN=EHI_066770 PE=3 SV=1	C4M261	EHI_066770	18 kDa	0	0	0	1.2447	1.4327	1.9187
Calponin homology domain protein, putative OS=Entamoeba histolytica HM-1:IMSS OX=294381 GN=EHI_199000 PE=1 SV=1	C4LWU6 (+2)	EHI_199000	70 kDa	0	8.2873	2.9935	2.4895	0.71637	1.9187
Axoneme-associated protein mst101 OS=Entamoeba histolytica HM-1:IMSS OX=294381 GN=EHI_110740 PE=4 SV=1	C4LUC1 (+2)	EHI_110740	95 kDa	0	0	0	1.2447	4.2982	2.5582
Protein kinase domain containing protein OS=Entamoeba histolytica HM-1:IMSS OX=294381 GN=EHI_118810 PE=4 SV=1	C4LYM9	EHI_118810	122 kDa	0	0	0	0.62236	0.71637	1.2791
60S ribosomal protein L11, putative OS=Entamoeba histolytica HM-1:IMSS OX=294381 GN=EHI_124300 PE=3 SV=1	C4LZG9 (+2)	EHI_124300	20 kDa	14.314	5.5249	5.987	2.4895	2.8655	0
Rab family GTPase OS=Entamoeba histolytica HM-1:IMSS OX=294381 GN=EHI_143650 PE=4 SV=1	A0A8U0WP91 (+2)	EHI_143650	23 kDa	0	0	0	2.4895	1.4327	1.2791
Uncharacterized protein OS=Entamoeba histolytica HM-1:IMSS OX=294381 GN=EHI_126950 PE=4 SV=1	C4LWX1 (+1)	EHI_126950	40 kDa	0	0	0	1.2447	1.4327	2.5582
Importin N-terminal domain-containing protein OS=Entamoeba histolytica HM-1:IMSS OX=294381 GN=EHI_171760 PE=4 SV=1	C4MAH1	EHI_171760	93 kDa	0	0	0	0	0.71637	0.63955
Filamin 2, putative OS=Entamoeba histolytica HM-1:IMSS OX=294381 GN=EHI_104630 PE=4 SV=1	C4LZ72 (+2)	EHI_104630	95 kDa	0	5.5249	2.9935	0.62236	4.2982	4.4769
Nucleoporin OS=Entamoeba histolytica HM-1:IMSS OX=294381 GN=EHI_110160 PE=4 SV=1	C4LU70 (+2)	EHI_110160	54 kDa	0	0	0	4.3566	5.0146	5.1164
Elongation factor 2 OS=Entamoeba histolytica HM-1:IMSS OX=294381 GN=EHI_166810 PE=3 SV=1	B1N306 (+2)	EHI_166810	97 kDa	0	5.5249	5.987	1.2447	0	0.63955
DNA double-strand break repair Rad50 ATPase OS=Entamoeba histolytica HM-1:IMSS OX=294381 GN=EHI_133530 PE=4 SV=1	C4M1L7 (+2)	EHI_133530	72 kDa	0	0	0	0	0	0
Small GTPase Rab7A OS=Entamoeba histolytica HM-1:IMSS OX=294381 GN=EHI_192810 PE=4 SV=1	A0A8U0WPK6 (+2)	EHI_192810	23 kDa	0	0	2.9935	3.1118	2.1491	0.63955
40S ribosomal protein S7 OS=Entamoeba histolytica HM-1:IMSS OX=294381 GN=EHI_140540 PE=3 SV=1	B1N3K9 (+2)	EHI_140540	22 kDa	0	0	0	0	0	0
Histone H4 OS=Entamoeba histolytica HM-1:IMSS OX=294381 GN=EHI_023230 PE=3 SV=1	C4LUN4 (+2)	EHI_023230	13 kDa	0	0	0	1.2447	0	1.9187
DUF4142 domain-containing protein OS=Entamoeba histolytica HM-1:IMSS OX=294381 GN=EHI_095180 PE=4 SV=1	C4M4T0 (+2)	EHI_095180	34 kDa	0	0	0	0	1.4327	0.63955
Secreted protein OS=Entamoeba histolytica HM-1:IMSS OX=294381 GN=EHI_109920 PE=4 SV=1	C4M3L1 (+2)	EHI_109920	53 kDa	0	2.7624	0	1.8671	2.8655	1.9187
Chaperonin 1 60 kDa OS=Entamoeba histolytica HM-1:IMSS OX=294381 GN=EHI_178570 PE=4 SV=1	A0A8U0WP12 (+2)	EHI_178570	57 kDa	0	8.2873	5.987	0	0	0
V-type ATPase, A subunit, putative OS=Entamoeba histolytica HM-1:IMSS OX=294381 GN=EHI_043010 PE=3 SV=1	A0A8U0WNY3 (+2)	EHI_043010	67 kDa	0	2.7624	2.9935	0.62236	1.4327	0.63955
Actinin-like protein, putative OS=Entamoeba histolytica HM-1:IMSS OX=294381 GN=EHI_155290 PE=4 SV=1	C4LW82 (+1)	EHI_155290	58 kDa	0	0	0	1.8671	0.71637	0.63955
Arp2/3 complex 34 kDa subunit OS=Entamoeba histolytica HM-1:IMSS OX=294381 GN=EHI_091250 PE=3 SV=1	C4M782	EHI_091250	34 kDa	0	2.7624	0	1.8671	0.71637	1.2791
UNC45-central domain-containing protein OS=Entamoeba histolytica HM-1:IMSS OX=294381 GN=EHI_068510 PE=4 SV=1	C4LU42 (+2)	EHI_068510	83 kDa	0	0	0	2.4895	1.4327	0
Uncharacterized protein OS=Entamoeba histolytica HM-1:IMSS OX=294381 GN=EHI_137110 PE=4 SV=1	C4M5Y9	EHI_137110	30 kDa	0	0	0	0.62236	1.4327	3.1978
Alpha-1,4 glucan phosphorylase (Fragment) OS=Entamoeba histolytica HM-1:IMSS-A OX=885318 GN=EHI7A_165570 PE=3 SV=1	N9TNP8	EHI7A_165570	97 kDa	0	0	0	1.8671	2.8655	1.9187
SNF7 family protein OS=Entamoeba histolytica HM-1:IMSS OX=294381 GN=EHI_194400 PE=4 SV=1	C4LZV3 (+2)	EHI_194400	28 kDa	0	0	0	2.4895	3.5819	3.1978
NTF2 domain-containing protein OS=Entamoeba histolytica HM-1:IMSS OX=294381 GN=EHI_035490 PE=3 SV=1	C4LXY0 (+2)	EHI_035490	61 kDa	0	0	0	3.1118	3.5819	1.2791
Protein PXR1-like OS=Entamoeba histolytica HM-1:IMSS OX=294381 GN=EHI_040340 PE=4 SV=1	C4M2G3	EHI_040340	24 kDa	0	0	0	1.2447	1.4327	1.2791
RNA recognition motif domain containing protein OS=Entamoeba histolytica HM-1:IMSS OX=294381 GN=EHI_026440 PE=4 SV=1	C4M5W4 (+2)	EHI_026440	29 kDa	14.314	5.5249	2.9935	1.8671	0.71637	0.63955
Peptidase S59 domain-containing protein OS=Entamoeba histolytica HM-1:IMSS OX=294381 GN=EHI_108620 PE=4 SV=1	C4M830 (+2)	EHI_108620	71 kDa	0	0	0	2.4895	1.4327	1.2791
Protein tyrosine kinase domain-containing protein OS=Entamoeba histolytica HM-1:IMSS OX=294381 GN=EHI_101280 PE=4 SV=1	C4M8B8	EHI_101280	134 kDa	0	0	0	1.8671	2.1491	1.9187
Small GTPase Rab11B OS=Entamoeba histolytica HM-1:IMSS OX=294381 GN=EHI_107250 PE=4 SV=1	A0A8U0WPZ4 (+2)	EHI_107250	24 kDa	0	0	0	2.4895	2.8655	0.63955
Heat shock protein 70 family OS=Entamoeba histolytica HM-1:IMSS OX=294381 GN=EHI_001950 PE=3 SV=1	C4M5K9 (+2)	EHI_001950	74 kDa	0	2.7624	0	0	0.71637	0
40S ribosomal protein S15a, putative OS=Entamoeba histolytica HM-1:IMSS OX=294381 GN=EHI_073600 PE=3 SV=1	C4LXM0 (+2)	EHI_073600	15 kDa	0	0	5.987	1.8671	0.71637	1.9187
60S ribosomal protein L26, putative OS=Entamoeba histolytica HM-1:IMSS OX=294381 GN=EHI_111570 PE=3 SV=1	C4M569 (+2)	EHI_111570	24 kDa	0	0	2.9935	0	0	0
LIM zinc finger domain containing protein OS=Entamoeba histolytica HM-1:IMSS OX=294381 GN=EHI_161940 PE=4 SV=1	C4M6N7 (+2)	EHI_161940	21 kDa	0	0	0	0	0.71637	1.2791
Sulfate adenylyltransferase OS=Entamoeba histolytica HM-1:IMSS OX=294381 GN=EHI_197160 PE=3 SV=1	C4LVD3 (+2)	EHI_197160	48 kDa	0	0	0	1.8671	2.1491	0.63955
Uncharacterized protein OS=Entamoeba histolytica HM-1:IMSS OX=294381 GN=EHI_006980 PE=4 SV=1	A0A8U0WPN4	EHI_006980	120 kDa	0	11.05	0	0	0	0
Chromosome partition protein, putative OS=Entamoeba histolytica HM-1:IMSS OX=294381 GN=EHI_155530 PE=4 SV=1	C4LWA4 (+2)	EHI_155530	121 kDa	0	0	0	0.62236	0.71637	1.2791
LisH domain-containing protein OS=Entamoeba histolytica HM-1:IMSS OX=294381 GN=EHI_051420 PE=4 SV=1	C4LY61 (+2)	EHI_051420	106 kDa	0	0	0	2.4895	0.71637	1.9187
DNAJ homolog subfamily A member 1, putative OS=Entamoeba histolytica HM-1:IMSS OX=294381 GN=EHI_182520 PE=4 SV=1	C4LV33 (+2)	EHI_182520	39 kDa	0	0	0	1.2447	2.1491	0.63955
60S ribosomal protein L14, putative OS=Entamoeba histolytica HM-1:IMSS OX=294381 GN=EHI_050130 PE=3 SV=1	C4LTQ0 (+2)	EHI_050130	13 kDa	14.314	2.7624	5.987	0.62236	0.71637	0.63955
DNA-directed RNA polymerase subunit beta OS=Entamoeba histolytica HM-1:IMSS OX=294381 GN=EHI_186020 PE=3 SV=1	C4MAB3 (+2)	EHI_186020	125 kDa	0	0	0	1.8671	0	0.63955
40S ribosomal protein S18, putative OS=Entamoeba histolytica HM-1:IMSS OX=294381 GN=EHI_009680 PE=3 SV=1	C4LZ42 (+3)	EHI_009680	18 kDa	14.314	5.5249	8.9805	1.8671	0.71637	1.2791
DNA-directed RNA polymerase III subunit RPC5 OS=Entamoeba histolytica HM-1:IMSS OX=294381 GN=EHI_093820 PE=3 SV=1	C4LYH3 (+2)	EHI_093820	48 kDa	0	0	0	1.2447	0	0.63955
60S ribosomal protein L6, putative OS=Entamoeba histolytica HM-1:IMSS OX=294381 GN=EHI_067520 PE=3 SV=1	C4M9F8	EHI_067520	23 kDa	0	0	0	0	0	0
90 kDa heat shock protein, putative OS=Entamoeba histolytica HM-1:IMSS OX=294381 GN=EHI_163480 PE=3 SV=1	C4M3S9 (+2)	EHI_163480	81 kDa	0	5.5249	2.9935	1.2447	0	0
EF-hand domain-containing protein OS=Entamoeba histolytica HM-1:IMSS OX=294381 GN=EHI_017560 PE=4 SV=1	C4M3G1 (+1)	EHI_017560	41 kDa	0	0	0	0	0	0
Fe-S cluster assembly protein NifU, putative OS=Entamoeba histolytica HM-1:IMSS OX=294381 GN=EHI_049620 PE=4 SV=1	A0A8U0WQ51 (+2)	EHI_049620	39 kDa	0	5.5249	5.987	1.2447	0.71637	0.63955
Uro-adherence factor A, putative OS=Entamoeba histolytica HM-1:IMSS OX=294381 GN=EHI_060430 PE=4 SV=1	C4M6J8	EHI_060430	120 kDa	0	0	0	2.4895	2.8655	3.1978
ATP-binding cassette, putative OS=Entamoeba histolytica HM-1:IMSS OX=294381 GN=EHI_095820 PE=4 SV=1	C4M3D9	EHI_095820	152 kDa	0	0	0	0.62236	0.71637	0.63955
DNA double-strand break repair Rad50 ATPase OS=Entamoeba histolytica HM-1:IMSS OX=294381 GN=EHI_084660 PE=4 SV=1	C4M1J7 (+1)	EHI_084660	122 kDa	0	0	0	0	0.71637	1.9187
Calponin-domain containing family protein OS=Entamoeba histolytica HM-1:IMSS-B OX=885319 GN=EHI8A_180230 PE=4 SV=1	M3US77 (+1)	EHI8A_180230	26 kDa	0	0	0	0	0	0
Protein disulfide isomerase, putative OS=Entamoeba histolytica HM-1:IMSS OX=294381 GN=EHI_071590 PE=3 SV=1	C4MB38	EHI_071590	42 kDa	0	2.7624	0	0.62236	0.71637	0
Uncharacterized protein OS=Entamoeba histolytica HM-1:IMSS OX=294381 GN=EHI_099350 PE=4 SV=1	C4M6C3 (+2)	EHI_099350	24 kDa	0	0	0	1.2447	1.4327	1.9187
Calponin-homology (CH) domain-containing protein OS=Entamoeba histolytica HM-1:IMSS OX=294381 GN=EHI_177190 PE=4 SV=1	C4LY33 (+1)	EHI_177190	84 kDa	0	0	0	3.7342	1.4327	3.8373
ATP synthase (E/31 kDa) subunit, putative (Fragment) OS=Entamoeba histolytica HM-1:IMSS-B OX=885319 GN=EHI8A_118640 PE=3 SV=1	M3UU68	EHI8A_118640	45 kDa	0	0	0	1.2447	1.4327	0
60S ribosomal protein L2/L8, putative OS=Entamoeba histolytica HM-1:IMSS OX=294381 GN=EHI_127200 PE=3 SV=1	C4LWZ3	EHI_127200	28 kDa	0	0	5.987	1.2447	2.1491	1.2791
Enhancer binding protein-2, putative OS=Entamoeba histolytica HM-1:IMSS OX=294381 GN=EHI_182670 PE=4 SV=1	C4LV48 (+2)	EHI_182670	26 kDa	0	0	2.9935	0.62236	0.71637	0
Uncharacterized protein OS=Entamoeba histolytica HM-1:IMSS OX=294381 GN=EHI_047800 PE=4 SV=1	C4M7X1 (+1)	EHI_047800	34 kDa	0	0	0	0.62236	2.8655	1.2791
Mucin-2, putative OS=Entamoeba histolytica HM-1:IMSS OX=294381 GN=EHI_173410 PE=3 SV=1	C4M6H8	EHI_173410	59 kDa	0	0	0	1.2447	0.71637	2.5582
Coronin OS=Entamoeba histolytica HM-1:IMSS OX=294381 GN=EHI_122800 PE=3 SV=1	C4M5M6 (+1)	EHI_122800	187 kDa	0	0	0	3.1118	0.71637	0.63955
PPM-type phosphatase domain-containing protein OS=Entamoeba histolytica HM-1:IMSS OX=294381 GN=EHI_138330 PE=4 SV=1	C4M3H6 (+1)	EHI_138330	102 kDa	0	0	0	0.62236	0	0.63955
Adhesin 112 (EhADH112) OS=Entamoeba histolytica HM-1:IMSS OX=294381 GN=EHI_181220 PE=4 SV=1	A0A8U0WNY2 (+2)	EHI_181220	78 kDa	0	0	0	0.62236	2.1491	1.2791
Malate dehydrogenase, putative OS=Entamoeba histolytica HM-1:IMSS OX=294381 GN=EHI_165350 PE=1 SV=1	C4M213 (+2)	EHI_165350	40 kDa	0	0	5.987	0	0	0
60S ribosomal protein L32, putative OS=Entamoeba histolytica HM-1:IMSS OX=294381 GN=EHI_092430 PE=3 SV=1	C4LV05 (+3)	EHI_092430	16 kDa	0	0	0	0	0	0
Actin-related protein 3, putative OS=Entamoeba histolytica HM-1:IMSS OX=294381 GN=EHI_198930 PE=3 SV=1	C4LWT9 (+2)	EHI_198930	47 kDa	0	0	0	1.2447	0.71637	0
Actin binding protein, putative OS=Entamoeba histolytica HM-1:IMSS OX=294381 GN=EHI_104390 PE=4 SV=1	C4LZ50	EHI_104390	64 kDa	0	0	0	1.8671	2.1491	2.5582
Zinc finger, C2H2 type family protein OS=Entamoeba histolytica HM-1:IMSS OX=294381 GN=EHI_158220 PE=4 SV=1	C4M2E1 (+2)	EHI_158220	42 kDa	0	0	0	1.8671	2.1491	1.9187
40S ribosomal protein S5, putative OS=Entamoeba histolytica HM-1:IMSS OX=294381 GN=EHI_044590 PE=3 SV=1	C4LT81	EHI_044590	23 kDa	7.1572	2.7624	2.9935	1.2447	1.4327	1.2791
40S ribosomal protein S16, putative OS=Entamoeba histolytica HM-1:IMSS OX=294381 GN=EHI_038620 PE=3 SV=1	C4LZP6	EHI_038620	17 kDa	0	0	0	1.2447	0.71637	0.63955
Actin-related protein 2/3 complex subunit 3 OS=Entamoeba histolytica HM-1:IMSS OX=294381 GN=EHI_174910 PE=3 SV=1	C4LZL6 (+1)	EHI_174910	22 kDa	0	0	0	0.62236	0	0.63955
Nucleoporin p58/p45 OS=Entamoeba histolytica HM-1:IMSS OX=294381 GN=EHI_010010 PE=4 SV=1	C4M0R5 (+2)	EHI_010010	33 kDa	0	0	0	0.62236	1.4327	2.5582
Uncharacterized protein OS=Entamoeba histolytica HM-1:IMSS OX=294381 GN=EHI_020080 PE=4 SV=1	C4MAN1 (+2)	EHI_020080	32 kDa	0	0	0	1.2447	2.1491	1.2791
Syntaxin binding protein, putative OS=Entamoeba histolytica HM-1:IMSS OX=294381 GN=EHI_093130 PE=4 SV=1	A0A8U0WPZ7 (+1)	EHI_093130	70 kDa	0	0	0	1.8671	2.1491	1.2791
40S ribosomal protein S14, putative OS=Entamoeba histolytica HM-1:IMSS OX=294381 GN=EHI_012360 PE=3 SV=1	B1N2I3 (+2)	EHI_012360	16 kDa	0	0	8.9805	1.8671	0.71637	0
C2 domain containing protein OS=Entamoeba histolytica HM-1:IMSS OX=294381 GN=EHI_069320 PE=4 SV=1	C4LWM0 (+2)	EHI_069320	21 kDa	0	0	0	1.2447	2.1491	1.9187
EF-hand calcium-binding domain containing protein OS=Entamoeba histolytica HM-1:IMSS OX=294381 GN=EHI_016120 PE=4 SV=1	C4MAN5 (+2)	EHI_016120	76 kDa	0	0	0	1.8671	2.1491	1.2791
Ran-binding protein, putative OS=Entamoeba histolytica HM-1:IMSS OX=294381 GN=EHI_009630 PE=3 SV=1	C4LZ37 (+2)	EHI_009630	120 kDa	0	0	0	0	0	1.2791
Vesicle-fusing ATPase OS=Entamoeba histolytica HM-1:IMSS OX=294381 GN=EHI_004640 PE=3 SV=1	C4LYS4 (+2)	EHI_004640	83 kDa	0	0	0	1.8671	2.1491	0.63955
Serine-threonine-isoleucine rich protein, putative OS=Entamoeba histolytica HM-1:IMSS OX=294381 GN=EHI_073630 PE=4 SV=1	C4LXM3 (+1)	EHI_073630	559 kDa	0	0	0	0	1.4327	5.756
RhoGAP domain containing protein OS=Entamoeba histolytica HM-1:IMSS OX=294381 GN=EHI_049570 PE=4 SV=1	C4LUF8	EHI_049570	73 kDa	7.1572	8.2873	14.968	0	0	0
VPS9 domain-containing protein OS=Entamoeba histolytica HM-1:IMSS OX=294381 GN=EHI_163600 PE=4 SV=1	C4M3U1 (+2)	EHI_163600	71 kDa	0	0	0	1.8671	0	1.2791
GTP-binding nuclear protein OS=Entamoeba histolytica HM-1:IMSS OX=294381 GN=EHI_148190 PE=3 SV=1	C4LSY9 (+2)	EHI_148190	25 kDa	0	2.7624	0	0.62236	0.71637	0.63955
C2 domain containing protein OS=Entamoeba histolytica HM-1:IMSS OX=294381 GN=EHI_059860 PE=4 SV=1	C4M344	EHI_059860	22 kDa	7.1572	0	0	0	1.4327	1.9187
Dynamin-like protein OS=Entamoeba histolytica HM-1:IMSS OX=294381 GN=EHI_052740 PE=3 SV=1	C4M3R5 (+2)	EHI_052740	75 kDa	0	0	0	0.62236	1.4327	2.5582
Centromere/microtubule binding protein cbf5, putative OS=Entamoeba histolytica HM-1:IMSS OX=294381 GN=EHI_115300 PE=3 SV=1	C4M8E1 (+2)	EHI_115300	54 kDa	0	0	0	1.2447	1.4327	1.9187
Transmembrane domain-containing protein OS=Entamoeba histolytica HM-1:IMSS OX=294381 GN=EHI_158120 PE=4 SV=1	C4M2D1 (+2)	EHI_158120	59 kDa	0	0	0	1.2447	1.4327	0.63955
Protein kinase domain containing protein OS=Entamoeba histolytica HM-1:IMSS OX=294381 GN=EHI_110250 PE=4 SV=1	C4LU78 (+2)	EHI_110250	72 kDa	0	0	0	0	0.71637	2.5582
Uncharacterized protein OS=Entamoeba histolytica HM-1:IMSS OX=294381 GN=EHI_155590 PE=4 SV=1	C4LWB0 (+2)	EHI_155590	20 kDa	0	0	0	0.62236	0.71637	0
Uncharacterized protein OS=Entamoeba histolytica HM-1:IMSS OX=294381 GN=EHI_031390 PE=4 SV=1	C4M4L6 (+2)	EHI_031390	20 kDa	0	0	0	1.8671	2.1491	1.2791
WD domain containing protein OS=Entamoeba histolytica HM-1:IMSS OX=294381 GN=EHI_118780 PE=4 SV=1	C4LYM6 (+2)	EHI_118780	38 kDa	0	0	0	0.62236	1.4327	0.63955
RING-type domain-containing protein OS=Entamoeba histolytica HM-1:IMSS OX=294381 GN=EHI_192840 PE=4 SV=1	B1N4D3 (+2)	EHI_192840	82 kDa	0	0	0	0	0.71637	0
Axoneme-associated protein mst101 OS=Entamoeba histolytica HM-1:IMSS OX=294381 GN=EHI_177640 PE=4 SV=1	C4LY17 (+2)	EHI_177640	56 kDa	0	0	0	0.62236	0.71637	1.9187
Soluble calcium-activated nucleotidase 1, putative OS=Entamoeba histolytica HM-1:IMSS OX=294381 GN=EHI_103690 PE=3 SV=1	C4LVL3 (+2)	EHI_103690	39 kDa	0	0	0	0.62236	0.71637	0.63955
Uncharacterized protein OS=Entamoeba histolytica HM-1:IMSS OX=294381 GN=EHI_021190 PE=4 SV=1	C4M035	EHI_021190	39 kDa	0	0	0	0	1.4327	0.63955
p-glycoprotein-1 OS=Entamoeba histolytica HM-1:IMSS OX=294381 GN=EHI_114150 PE=4 SV=1	C4M422	EHI_114150	145 kDa	0	0	0	1.2447	1.4327	1.2791
14-3-3 protein 1 OS=Entamoeba histolytica HM-1:IMSS OX=294381 GN=EHI_025360 PE=3 SV=1	C4M323 (+2)	EHI_025360	27 kDa	0	0	0	0	0	0
Axoneme-associated protein OS=Entamoeba histolytica HM-1:IMSS OX=294381 GN=EHI_117850 PE=4 SV=1	C4LYW9 (+2)	EHI_117850	18 kDa	0	0	0	1.8671	1.4327	1.2791
Phospholipid-transporting ATPase OS=Entamoeba histolytica HM-1:IMSS OX=294381 GN=EHI_096620 PE=3 SV=1	C4LWH4 (+2)	EHI_096620	132 kDa	0	0	0	1.2447	1.4327	2.5582
C2 domain protein, putative OS=Entamoeba histolytica HM-1:IMSS OX=294381 GN=EHI_015290 PE=3 SV=1	C4M0W7 (+2)	EHI_015290	30 kDa	0	0	0	1.2447	2.1491	1.2791
Protein tyrosine kinase domain-containing protein OS=Entamoeba histolytica HM-1:IMSS OX=294381 GN=EHI_201270 PE=4 SV=1	C4M6Q6	EHI_201270	134 kDa	0	0	0	0	1.4327	1.2791
60S ribosomal protein L10, putative OS=Entamoeba histolytica HM-1:IMSS OX=294381 GN=EHI_044810 PE=3 SV=1	C4LTA0	EHI_044810	24 kDa	0	2.7624	0	1.2447	1.4327	0
Vacuolar protein sorting-associated protein OS=Entamoeba histolytica HM-1:IMSS OX=294381 GN=EHI_055720 PE=4 SV=1	C4M7B4 (+2)	EHI_055720	66 kDa	0	0	0	1.2447	0.71637	1.2791
WD_REPEATS_REGION domain-containing protein OS=Entamoeba histolytica HM-1:IMSS OX=294381 GN=EHI_104430 PE=4 SV=1	C4LZ54 (+2)	EHI_104430	73 kDa	0	0	0	0.62236	0	0
20 kDa antigen OS=Entamoeba histolytica HM-1:IMSS OX=294381 GN=EHI_057670 PE=4 SV=1	C4M6Z9 (+1)	EHI_057670	21 kDa	0	0	2.9935	0	2.1491	3.1978
DNA double-strand break repair Rad50 ATPase OS=Entamoeba histolytica HM-1:IMSS OX=294381 GN=EHI_122900 PE=4 SV=1	C4M5M1 (+1)	EHI_122900	74 kDa	0	0	0	0.62236	0	1.2791
60S ribosomal protein L24, putative OS=Entamoeba histolytica HM-1:IMSS OX=294381 GN=EHI_030760 PE=3 SV=1	C4LSA0	EHI_030760	19 kDa	0	8.2873	8.9805	0	0	0
LIM zinc finger domain containing protein OS=Entamoeba histolytica HM-1:IMSS OX=294381 GN=EHI_025450 PE=4 SV=1	C4M332 (+2)	EHI_025450	25 kDa	0	0	5.987	1.2447	2.1491	2.5582
Phosphoglycerate kinase OS=Entamoeba histolytica HM-1:IMSS OX=294381 GN=EHI_188180 PE=3 SV=1	C4M192 (+2)	EHI_188180	45 kDa	0	2.7624	8.9805	0.62236	0	0
60S ribosomal protein L13, putative OS=Entamoeba histolytica HM-1:IMSS OX=294381 GN=EHI_181560 PE=3 SV=1	C4M8R8	EHI_181560	33 kDa	0	2.7624	0	0.62236	0	0
Uncharacterized protein OS=Entamoeba histolytica HM-1:IMSS OX=294381 GN=EHI_048240 PE=4 SV=1	C4M4B5 (+2)	EHI_048240	20 kDa	0	0	0	0	0	0.63955
V-type proton ATPase subunit OS=Entamoeba histolytica HM-1:IMSS OX=294381 GN=EHI_106350 PE=3 SV=1	C4M399 (+2)	EHI_106350	40 kDa	0	0	0	0	0.71637	0.63955
Cell surface protease gp63, putative OS=Entamoeba histolytica HM-1:IMSS OX=294381 GN=EHI_200230 PE=3 SV=1	C4M7M4 (+2)	EHI_200230	72 kDa	0	0	0	1.8671	1.4327	1.9187
NTF2 domain-containing protein OS=Entamoeba histolytica HM-1:IMSS OX=294381 GN=EHI_080900 PE=3 SV=1	C4MAD6 (+2)	EHI_080900	52 kDa	0	0	0	0.62236	0.71637	0.63955
Transmembrane protein OS=Entamoeba histolytica HM-1:IMSS OX=294381 GN=EHI_088470 PE=4 SV=1	C4MA16 (+2)	EHI_088470	19 kDa	0	0	0	1.2447	0.71637	0.63955
Uncharacterized protein OS=Entamoeba histolytica HM-1:IMSS OX=294381 GN=EHI_170460 PE=4 SV=1	A0A8U0WQ52 (+2)	EHI_170460	39 kDa	0	0	0	1.2447	2.1491	1.2791
Uncharacterized protein OS=Entamoeba histolytica HM-1:IMSS-B OX=885319 GN=EHI8A_039800 PE=4 SV=1	M3THR8 (+1)	EHI8A_039800	29 kDa	0	0	0	1.2447	1.4327	1.2791
Malic enzyme, putative OS=Entamoeba histolytica HM-1:IMSS OX=294381 GN=EHI_044970 PE=1 SV=1	A0A8U0WNY6 (+3)	EHI_044970	53 kDa	0	2.7624	0	0.62236	0.71637	0
CHAD domain-containing protein OS=Entamoeba histolytica HM-1:IMSS OX=294381 GN=EHI_182980 PE=4 SV=1	B1N2P1	EHI_182980	34 kDa	0	0	0	0	0	0.63955
Peptidase S74 domain-containing protein OS=Entamoeba histolytica HM-1:IMSS OX=294381 GN=EHI_185450 PE=4 SV=1	B1N494	EHI_185450	94 kDa	0	0	0	0	0	0
Histone H1-like nucleoprotein HC2 OS=Entamoeba histolytica HM-1:IMSS OX=294381 GN=EHI_096340 PE=4 SV=1	C4LWE7 (+2)	EHI_096340	40 kDa	0	0	0	0	1.4327	0.63955
F_actin_bund_C domain-containing protein OS=Entamoeba histolytica HM-1:IMSS OX=294381 GN=EHI_004550 PE=4 SV=1	C4LYR5 (+1)	EHI_004550	45 kDa	0	2.7624	8.9805	1.8671	1.4327	1.2791
Rab family GTPase OS=Entamoeba histolytica HM-1:IMSS OX=294381 GN=EHI_199820 PE=4 SV=1	A0A8U0WPS5 (+2)	EHI_199820	22 kDa	0	0	0	1.2447	0.71637	1.2791
SNF7 family protein OS=Entamoeba histolytica HM-1:IMSS OX=294381 GN=EHI_169820 PE=4 SV=1	C4M1A5 (+2)	EHI_169820	24 kDa	0	0	0	0	0	0
WH2 domain-containing protein OS=Entamoeba histolytica HM-1:IMSS OX=294381 GN=EHI_016130 PE=4 SV=1	C4MAN6 (+2)	EHI_016130	56 kDa	0	0	0	1.8671	0.71637	1.9187
Chromosome partition protein Smc OS=Entamoeba histolytica HM-1:IMSS OX=294381 GN=EHI_107130 PE=4 SV=1	C4M154 (+1)	EHI_107130	40 kDa	0	0	0	0	0.71637	1.9187
60S ribosomal protein L17, putative OS=Entamoeba histolytica HM-1:IMSS OX=294381 GN=EHI_127330 PE=3 SV=1	C4LX05 (+1)	EHI_127330	20 kDa	0	0	0	1.2447	0	0.63955
Profilin OS=Entamoeba histolytica HM-1:IMSS OX=294381 GN=EHI_176140 PE=3 SV=1	C4MB21 (+2)	EHI_176140	13 kDa	0	2.7624	5.987	1.2447	0.71637	0
Rab family GTPase OS=Entamoeba histolytica HM-1:IMSS OX=294381 GN=EHI_046390 PE=4 SV=1	A0A8U0WQ41	EHI_046390	24 kDa	0	0	0	0	0.71637	0
Nucleoporin NUP53 OS=Entamoeba histolytica HM-1:IMSS OX=294381 GN=EHI_026310 PE=4 SV=1	C4M5V9 (+2)	EHI_026310	51 kDa	0	0	0	0.62236	0.71637	0
Uncharacterized protein OS=Entamoeba histolytica HM-1:IMSS OX=294381 GN=EHI_192420 PE=4 SV=1	C4M1G2 (+1)	EHI_192420	34 kDa	0	0	0	1.2447	0.71637	0
Uncharacterized protein OS=Entamoeba histolytica HM-1:IMSS-B OX=885319 GN=EHI8A_147110 PE=4 SV=1	M3S967 (+1)	EHI8A_147110	30 kDa	0	0	0	0	0	0.63955
DNA-directed RNA polymerase II large subunit, putative OS=Entamoeba histolytica HM-1:IMSS OX=294381 GN=EHI_121760 PE=4 SV=1	A0A8U0WPB3 (+2)	EHI_121760	185 kDa	0	0	0	0	0.71637	0
Caldesmon OS=Entamoeba histolytica HM-1:IMSS OX=294381 GN=EHI_092080 PE=4 SV=1	C4LUX3 (+2)	EHI_092080	58 kDa	0	0	0	1.8671	1.4327	2.5582
RhoGAP domain containing protein OS=Entamoeba histolytica HM-1:IMSS OX=294381 GN=EHI_017650 PE=4 SV=1	C4M3H0 (+2)	EHI_017650	48 kDa	0	0	0	0	0.71637	0
Beige/BEACH domain containing protein OS=Entamoeba histolytica HM-1:IMSS OX=294381 GN=EHI_175420 PE=4 SV=1	C4M3A9 (+2)	EHI_175420	100 kDa	0	0	0	1.2447	1.4327	1.9187
Proteasome subunit alpha type OS=Entamoeba histolytica HM-1:IMSS OX=294381 GN=EHI_163650 PE=3 SV=1	C4M3U5 (+1)	EHI_163650	28 kDa	0	0	0	0	0	0
Enhancer binding protein-1 OS=Entamoeba histolytica HM-1:IMSS OX=294381 GN=EHI_121780 PE=4 SV=1	C4M5C4 (+2)	EHI_121780	35 kDa	0	8.2873	2.9935	1.8671	0	0
CXXC-rich protein OS=Entamoeba histolytica HM-1:IMSS OX=294381 GN=EHI_111990 PE=3 SV=1	C4M7I1 (+2)	EHI_111990	131 kDa	0	0	0	0.62236	0	0
Uncharacterized protein OS=Entamoeba histolytica HM-1:IMSS OX=294381 GN=EHI_107040 PE=4 SV=1	A0A8U0WP02 (+2)	EHI_107040	32 kDa	0	0	0	0	1.4327	1.2791
Ccaat-box-binding transcription factor, putative OS=Entamoeba histolytica HM-1:IMSS OX=294381 GN=EHI_132370 PE=3 SV=1	C4M8Q0 (+2)	EHI_132370	84 kDa	0	0	0	1.2447	0.71637	0
V-type proton ATPase subunit a OS=Entamoeba histolytica HM-1:IMSS OX=294381 GN=EHI_074020 PE=3 SV=1	C4M2Z1 (+2)	EHI_074020	93 kDa	0	0	0	1.2447	1.4327	1.2791
WD domain, G-beta repeat protein OS=Entamoeba histolytica HM-1:IMSS OX=294381 GN=EHI_178780 PE=4 SV=1	C4LUU2 (+2)	EHI_178780	102 kDa	0	0	0	0.62236	1.4327	0.63955
Protein serine/threonine kinase OS=Entamoeba histolytica HM-1:IMSS OX=294381 GN=EHI_052880 PE=4 SV=1	C4M3S6 (+2)	EHI_052880	200 kDa	0	0	0	0.62236	1.4327	1.9187
Heat shock protein 90, putative OS=Entamoeba histolytica HM-1:IMSS OX=294381 GN=EHI_102270 PE=3 SV=1	C4MBP1 (+1)	EHI_102270	83 kDa	0	0	0	1.2447	0.71637	0
Adenylyl-sulfate kinase OS=Entamoeba histolytica HM-1:IMSS OX=294381 GN=EHI_179080 PE=3 SV=1	C4LUW9 (+2)	EHI_179080	53 kDa	0	0	0	0	0	0
LisH domain-containing protein OS=Entamoeba histolytica HM-1:IMSS OX=294381 GN=EHI_138520 PE=4 SV=1	C4M3J4 (+2)	EHI_138520	111 kDa	0	0	0	1.2447	1.4327	0
Helicase, putative OS=Entamoeba histolytica HM-1:IMSS OX=294381 GN=EHI_044890 PE=4 SV=1	C4LTA8 (+2)	EHI_044890	112 kDa	0	0	0	0	0	0
TBC domain containing protein OS=Entamoeba histolytica HM-1:IMSS OX=294381 GN=EHI_009510 PE=4 SV=1	C4LZ27 (+2)	EHI_009510	36 kDa	0	0	0	0.62236	1.4327	0.63955
5'-3' exoribonuclease OS=Entamoeba histolytica HM-1:IMSS OX=294381 GN=EHI_132400 PE=3 SV=1	C4M8Q3 (+2)	EHI_132400	92 kDa	0	0	0	0.62236	0.71637	0
Transcription elongation factor spt6 OS=Entamoeba histolytica HM-1:IMSS OX=294381 GN=EHI_092290 PE=4 SV=1	C4LUZ3	EHI_092290	145 kDa	0	0	0	2.4895	0.71637	0
40S ribosomal protein S24, putative OS=Entamoeba histolytica HM-1:IMSS OX=294381 GN=EHI_148820 PE=3 SV=1	C4LT49 (+2)	EHI_148820	16 kDa	0	0	0	0.62236	0.71637	0.63955
Coronin OS=Entamoeba histolytica HM-1:IMSS OX=294381 GN=EHI_083590 PE=3 SV=1	C4M943 (+1)	EHI_083590	48 kDa	0	0	0	0	0	1.2791
60S ribosomal protein L7, putative OS=Entamoeba histolytica HM-1:IMSS OX=294381 GN=EHI_025830 PE=3 SV=1	C4M938	EHI_025830	26 kDa	0	0	0	1.8671	0	0
Nucleolar GTP-binding protein 1 OS=Entamoeba histolytica HM-1:IMSS OX=294381 GN=EHI_174940 PE=3 SV=1	C4LZL9 (+1)	EHI_174940	76 kDa	0	0	0	1.2447	0.71637	0
Viral A-type inclusion protein OS=Entamoeba histolytica HM-1:IMSS OX=294381 GN=EHI_064640 PE=4 SV=1	C4M0D0 (+2)	EHI_064640	31 kDa	0	0	0	1.2447	2.1491	2.5582
Sec1 family protein OS=Entamoeba histolytica HM-1:IMSS OX=294381 GN=EHI_060310 PE=4 SV=1	C4M6I8 (+2)	EHI_060310	53 kDa	0	0	0	0	0	0
ShKT domain-containing protein OS=Entamoeba histolytica HM-1:IMSS OX=294381 GN=EHI_050520 PE=4 SV=1	C4LTS5 (+2)	EHI_050520	25 kDa	0	0	0	0	0	0
60S acidic ribosomal protein P0 OS=Entamoeba histolytica HM-1:IMSS OX=294381 GN=EHI_090400 PE=3 SV=1	B1N2Z3	EHI_090400	34 kDa	0	0	8.9805	0	0	0
26s proteasome subunit P45 family protein, putative OS=Entamoeba histolytica HM-1:IMSS OX=294381 GN=EHI_177320 PE=3 SV=1	C4LY36 (+2)	EHI_177320	44 kDa	0	0	0	0.62236	0.71637	0.63955
Uncharacterized protein OS=Entamoeba histolytica HM-1:IMSS OX=294381 GN=EHI_131050 PE=4 SV=1	C4LXH3 (+2)	EHI_131050	52 kDa	0	0	0	0.62236	0	0
Galactose-inhibitable lectin small subunit, putative OS=Entamoeba histolytica HM-1:IMSS OX=294381 GN=EHI_159870 PE=4 SV=1	B1N2V4 (+2)	EHI_159870	31 kDa	0	0	0	1.8671	1.4327	1.9187
Axoneme-associated protein mst101(2)-like OS=Entamoeba histolytica HM-1:IMSS OX=294381 GN=EHI_096350 PE=4 SV=1	C4LWE8 (+2)	EHI_096350	59 kDa	0	0	0	0.62236	0.71637	0.63955
Gal/GalNAc lectin heavy subunit, putative OS=Entamoeba histolytica HM-1:IMSS OX=294381 GN=EHI_046650 PE=4 SV=1	C4M7A1 (+1)	EHI_046650	135 kDa	0	0	0	0.62236	0.71637	0.63955
Rho guanine nucleotide exchange factor, putative OS=Entamoeba histolytica HM-1:IMSS OX=294381 GN=EHI_078740 PE=1 SV=1	C4M4E9 (+2)	EHI_078740	99 kDa	0	0	0	0.62236	1.4327	1.2791
DNA double-strand break repair Rad50 ATPase OS=Entamoeba histolytica HM-1:IMSS OX=294381 GN=EHI_066720 PE=4 SV=1	C4MAC6 (+2)	EHI_066720	242 kDa	0	0	0	3.7342	1.4327	0
60S ribosomal protein L12, putative OS=Entamoeba histolytica HM-1:IMSS OX=294381 GN=EHI_030710 PE=3 SV=1	C4M1E1	EHI_030710	18 kDa	7.1572	2.7624	2.9935	0.62236	0.71637	0.63955
60S ribosomal protein L7, putative OS=Entamoeba histolytica HM-1:IMSS OX=294381 GN=EHI_010650 PE=3 SV=1	C4LYV2 (+2)	EHI_010650	26 kDa	0	2.7624	5.987	1.2447	0.71637	0
Transmembrane protein OS=Entamoeba histolytica HM-1:IMSS OX=294381 GN=EHI_068670 PE=4 SV=1	C4LU57 (+2)	EHI_068670	19 kDa	0	0	0	0.62236	0.71637	1.2791
Uncharacterized protein OS=Entamoeba histolytica HM-1:IMSS OX=294381 GN=EHI_182730 PE=4 SV=1	C4LV54 (+2)	EHI_182730	19 kDa	0	0	0	0	0	0.63955
Serine/threonine protein kinase OS=Entamoeba histolytica HM-1:IMSS OX=294381 GN=EHI_015420 PE=4 SV=1	B1N399 (+2)	EHI_015420	85 kDa	0	0	0	0.62236	0	0.63955
Uncharacterized protein OS=Entamoeba histolytica HM-1:IMSS OX=294381 GN=EHI_069150 PE=4 SV=1	B1N2T7 (+2)	EHI_069150	39 kDa	0	0	0	1.2447	1.4327	1.2791
ANK_REP_REGION domain-containing protein OS=Entamoeba histolytica HM-1:IMSS OX=294381 GN=EHI_021460 PE=4 SV=1	C4M060 (+2)	EHI_021460	82 kDa	0	0	0	0.62236	0.71637	0
40S ribosomal protein S13, putative OS=Entamoeba histolytica HM-1:IMSS OX=294381 GN=EHI_035460 PE=3 SV=1	A0A175JJM9 (+1)	EHI_035460	17 kDa	0	2.7624	2.9935	0	0	0
TLDc domain-containing protein OS=Entamoeba histolytica HM-1:IMSS OX=294381 GN=EHI_201280 PE=4 SV=1	C4M6Q7 (+2)	EHI_201280	45 kDa	0	0	0	1.8671	0.71637	0.63955
Secreted protein OS=Entamoeba histolytica HM-1:IMSS OX=294381 GN=EHI_050510 PE=4 SV=1	C4LTS4 (+2)	EHI_050510	42 kDa	0	0	0	0	0	1.9187
F-box only protein OS=Entamoeba histolytica HM-1:IMSS OX=294381 GN=EHI_153290 PE=4 SV=1	C4LSC0 (+2)	EHI_153290	47 kDa	0	0	0	0.62236	0	1.9187
LTXXQ motif family protein OS=Entamoeba histolytica HM-1:IMSS OX=294381 GN=EHI_108710 PE=4 SV=1	C4M835 (+2)	EHI_108710	16 kDa	0	0	0	0	0	0
p-glycoprotein-5 OS=Entamoeba histolytica HM-1:IMSS OX=294381 GN=EHI_175450 PE=4 SV=1	C4M3B2	EHI_175450	145 kDa	0	0	0	0	0	1.2791
Uncharacterized protein OS=Entamoeba histolytica HM-1:IMSS OX=294381 GN=EHI_025370 PE=4 SV=1	C4M324 (+2)	EHI_025370	96 kDa	0	0	0	1.2447	1.4327	1.9187
Vacuolar ATP synthase subunit E, putative OS=Entamoeba histolytica HM-1:IMSS OX=294381 GN=EHI_182560 PE=3 SV=1	C4LV37 (+1)	EHI_182560	25 kDa	0	0	0	0	1.4327	0
40S ribosomal protein S11, putative OS=Entamoeba histolytica HM-1:IMSS OX=294381 GN=EHI_155410 PE=3 SV=1	C4LW92 (+1)	EHI_155410	18 kDa	0	2.7624	0	0	0	0
60S ribosomal protein L7, putative OS=Entamoeba histolytica HM-1:IMSS OX=294381 GN=EHI_141990 PE=4 SV=1	C4LW44 (+2)	EHI_141990	29 kDa	0	0	0	1.8671	0.71637	0
Cortexillin, putative OS=Entamoeba histolytica HM-1:IMSS OX=294381 GN=EHI_104560 PE=4 SV=1	B1N341	EHI_104560	65 kDa	0	0	0	0	0	0
SH3 domain-containing protein OS=Entamoeba histolytica HM-1:IMSS OX=294381 GN=EHI_130920 PE=3 SV=1	C4LXG0 (+1)	EHI_130920	280 kDa	0	0	0	0	0	0
NUC173 domain-containing protein OS=Entamoeba histolytica HM-1:IMSS OX=294381 GN=EHI_092660 PE=3 SV=1	C4LV26 (+2)	EHI_092660	129 kDa	0	0	0	0	1.4327	0.63955
Rab family GTPase OS=Entamoeba histolytica HM-1:IMSS OX=294381 GN=EHI_005460 PE=4 SV=1	A0A8U0WP83 (+2)	EHI_005460	23 kDa	0	0	0	0	0	0
Conserved secreted protein OS=Entamoeba histolytica HM-1:IMSS OX=294381 GN=EHI_148240 PE=4 SV=1	C4LSZ4 (+2)	EHI_148240	15 kDa	0	0	0	0	0.71637	0
Nucleotide binding protein 2, putative OS=Entamoeba histolytica HM-1:IMSS OX=294381 GN=EHI_000610 PE=3 SV=1	C4LZB2 (+2)	EHI_000610	29 kDa	0	0	0	0	0	0
Uncharacterized protein OS=Entamoeba histolytica HM-1:IMSS OX=294381 GN=EHI_067090 PE=4 SV=1	C4MA45 (+2)	EHI_067090	24 kDa	0	0	0	1.8671	0.71637	1.2791
Histone H2A OS=Entamoeba histolytica HM-1:IMSS OX=294381 GN=EHI_188960 PE=3 SV=1	C4M2W3	EHI_188960	18 kDa	0	0	0	0.62236	1.4327	1.2791
Uncharacterized protein OS=Entamoeba histolytica HM-1:IMSS OX=294381 GN=EHI_069560 PE=4 SV=1	C4LWP4 (+2)	EHI_069560	23 kDa	0	0	0	1.2447	1.4327	0.63955
Formin 2 OS=Entamoeba histolytica HM-1:IMSS OX=294381 GN=EHI_188820 PE=4 SV=1	C4M2U9 (+2)	EHI_188820	59 kDa	0	0	0	1.8671	0.71637	0
MIT domain protein OS=Entamoeba histolytica HM-1:IMSS OX=294381 GN=EHI_093860 PE=4 SV=1	C4LYH7 (+1)	EHI_093860	76 kDa	0	0	0	0.62236	0.71637	1.2791
RRM domain-containing protein OS=Entamoeba histolytica HM-1:IMSS OX=294381 GN=EHI_048650 PE=4 SV=1	C4M2X8 (+2)	EHI_048650	19 kDa	0	0	0	0.62236	0.71637	1.2791
Intracellular protein transport protein USO1, putative OS=Entamoeba histolytica HM-1:IMSS OX=294381 GN=EHI_147540 PE=4 SV=1	B1N402 (+1)	EHI_147540	109 kDa	0	0	0	0	0	0
VHS domain-containing protein OS=Entamoeba histolytica HM-1:IMSS OX=294381 GN=EHI_004370 PE=4 SV=1	C4LYQ0 (+2)	EHI_004370	39 kDa	0	0	0	1.2447	1.4327	0
TolA protein, putative OS=Entamoeba histolytica HM-1:IMSS OX=294381 GN=EHI_159620 PE=4 SV=1	C4LX42 (+2)	EHI_159620	35 kDa	0	0	5.987	0	0	0
Sec1 family protein OS=Entamoeba histolytica HM-1:IMSS OX=294381 GN=EHI_160900 PE=4 SV=1	A0A8U0WPJ0 (+2)	EHI_160900	60 kDa	0	0	0	0.62236	0.71637	0
Uncharacterized protein OS=Entamoeba histolytica HM-1:IMSS OX=294381 GN=EHI_068490 PE=4 SV=1	C4LU40 (+2)	EHI_068490	36 kDa	0	0	0	0.62236	0	0
Heat shock protein, putative OS=Entamoeba histolytica HM-1:IMSS OX=294381 GN=EHI_022620 PE=3 SV=1	B1N2L8 (+2)	EHI_022620	98 kDa	0	0	0	1.2447	0	0
40S ribosomal protein S26 OS=Entamoeba histolytica HM-1:IMSS OX=294381 GN=EHI_105180 PE=3 SV=1	C4M123 (+2)	EHI_105180	16 kDa	0	0	0	0.62236	0	0
Transmembrane protein 144 OS=Entamoeba histolytica HM-1:IMSS OX=294381 GN=EHI_057700 PE=3 SV=1	C4M705 (+2)	EHI_057700	44 kDa	0	0	0	1.2447	0.71637	1.2791
Non-specific serine/threonine protein kinase OS=Entamoeba histolytica HM-1:IMSS OX=294381 GN=EHI_151950 PE=3 SV=1	C4LSN4 (+2)	EHI_151950	39 kDa	0	0	0	0	0.71637	1.9187
Rho family GTPase OS=Entamoeba histolytica HM-1:IMSS OX=294381 GN=EHI_070730 PE=3 SV=1	C4M5T0	EHI_070730	22 kDa	0	0	0	0	0	0
Nucleolar complex protein 2 homolog, putative OS=Entamoeba histolytica HM-1:IMSS OX=294381 GN=EHI_105790 PE=3 SV=1	C4M9H6 (+2)	EHI_105790	58 kDa	0	0	0	1.2447	1.4327	0
Villin, putative OS=Entamoeba histolytica HM-1:IMSS OX=294381 GN=EHI_007480 PE=4 SV=1	C4LYC0 (+2)	EHI_007480	77 kDa	0	0	0	2.4895	1.4327	2.5582
Beta_helix domain-containing protein OS=Entamoeba histolytica HM-1:IMSS OX=294381 GN=EHI_103420 PE=4 SV=1	C4LVI6 (+1)	EHI_103420	48 kDa	0	0	0	0	0.71637	1.2791
Saposin B-type domain-containing protein OS=Entamoeba histolytica HM-1:IMSS OX=294381 GN=EHI_048580 PE=4 SV=1	C4M2X1 (+1)	EHI_048580	105 kDa	0	0	0	0	0	0
BRO1 domain-containing protein OS=Entamoeba histolytica HM-1:IMSS OX=294381 GN=EHI_165220 PE=4 SV=1	C4M203 (+2)	EHI_165220	103 kDa	0	0	0	0	0.71637	1.9187
Ribosomal protein L23A, putative OS=Entamoeba histolytica HM-1:IMSS OX=294381 GN=EHI_182850 PE=3 SV=1	C4LV64 (+2)	EHI_182850	14 kDa	0	0	0	0	0.71637	1.2791
Periplasmic heavy metal sensor OS=Entamoeba histolytica HM-1:IMSS OX=294381 GN=EHI_081630 PE=4 SV=1	C4M684 (+1)	EHI_081630	20 kDa	0	0	0	0	0	0
F-actin-capping protein subunit beta OS=Entamoeba histolytica HM-1:IMSS OX=294381 GN=EHI_005020 PE=3 SV=1	C4M096 (+1)	EHI_005020	31 kDa	0	0	0	1.8671	1.4327	1.9187
V-type proton ATPase subunit G OS=Entamoeba histolytica HM-1:IMSS OX=294381 GN=EHI_086230 PE=3 SV=1	C4M378 (+2)	EHI_086230	13 kDa	0	0	0	1.2447	1.4327	1.2791
p-glycoprotein 6, putative OS=Entamoeba histolytica HM-1:IMSS OX=294381 GN=EHI_050640 PE=4 SV=1	B1N2J5	EHI_050640	50 kDa	0	0	0	0	0.71637	0
Protein tyrosine kinase domain-containing protein OS=Entamoeba histolytica HM-1:IMSS OX=294381 GN=EHI_064500 PE=4 SV=1	C4M0B9	EHI_064500	133 kDa	0	0	0	0	0	0
60S ribosomal protein L35a, putative OS=Entamoeba histolytica HM-1:IMSS OX=294381 GN=EHI_014110 PE=3 SV=1	B1N4V3 (+2)	EHI_014110	12 kDa	14.314	5.5249	5.987	0.62236	0	0.63955
Pept_C1 domain-containing protein OS=Entamoeba histolytica HM-1:IMSS-B OX=885319 GN=EHI8A_021990 PE=3 SV=1	M3TBT6 (+1)	EHI8A_021990	63 kDa	0	0	0	0	0.71637	0
Ribosome biogenesis protein BOP1 homolog OS=Entamoeba histolytica HM-1:IMSS OX=294381 GN=EHI_163740 PE=3 SV=1	C4M3V4 (+1)	EHI_163740	68 kDa	0	0	0	1.8671	1.4327	0
Cysteine proteinase 2, putative OS=Entamoeba histolytica HM-1:IMSS-B OX=885319 GN=EHI8A_050360 PE=3 SV=1	M3S7G8	EHI8A_050360	35 kDa	0	0	0	1.2447	0	0
Calponin-homology (CH) domain-containing protein OS=Entamoeba histolytica HM-1:IMSS OX=294381 GN=EHI_156420 PE=4 SV=1	C4M4E1 (+2)	EHI_156420	46 kDa	0	0	0	0.62236	1.4327	0.63955
I/LWEQ domain protein OS=Entamoeba histolytica HM-1:IMSS OX=294381 GN=EHI_003930 PE=4 SV=1	C4M9B6 (+2)	EHI_003930	115 kDa	0	0	0	0.62236	0	1.2791
G domain-containing protein OS=Entamoeba histolytica HM-1:IMSS OX=294381 GN=EHI_011270 PE=4 SV=1	C4M7D6	EHI_011270	93 kDa	0	0	0	0	0	2.5582
40S ribosomal protein S10, putative OS=Entamoeba histolytica HM-1:IMSS OX=294381 GN=EHI_197030 PE=3 SV=1	C4LVC0 (+2)	EHI_197030	15 kDa	0	0	2.9935	0	0.71637	0.63955
Rho family GTPase OS=Entamoeba histolytica HM-1:IMSS OX=294381 GN=EHI_129750 PE=3 SV=1	C4M5Q7 (+2)	EHI_129750	22 kDa	0	0	0	0.62236	0	0
Nucleolar phosphoprotein Nopp34, putative OS=Entamoeba histolytica HM-1:IMSS OX=294381 GN=EHI_068680 PE=4 SV=1	C4LU58 (+2)	EHI_068680	18 kDa	0	0	0	1.2447	1.4327	0
Uncharacterized protein OS=Entamoeba histolytica HM-1:IMSS OX=294381 GN=EHI_182860 PE=4 SV=1	C4LV65 (+2)	EHI_182860	47 kDa	0	0	0	0.62236	0.71637	0.63955
Rab family GTPase OS=Entamoeba histolytica HM-1:IMSS OX=294381 GN=EHI_161030 PE=3 SV=1	C4M2S0 (+2)	EHI_161030	24 kDa	0	0	0	0.62236	0	1.9187
Eukaryotic translation initiation factor 5B OS=Entamoeba histolytica HM-1:IMSS OX=294381 GN=EHI_039330 PE=4 SV=1	C4M8C5	EHI_039330	67 kDa	0	0	0	1.2447	0	0.63955
Nuclear pore protein, putative OS=Entamoeba histolytica HM-1:IMSS OX=294381 GN=EHI_179400 PE=4 SV=1	C4M9Y0 (+2)	EHI_179400	39 kDa	0	0	0	1.2447	0.71637	1.2791
SAC3/GANP family protein OS=Entamoeba histolytica HM-1:IMSS OX=294381 GN=EHI_199100 PE=4 SV=1	C4LWV5 (+2)	EHI_199100	57 kDa	0	0	0	0.62236	0.71637	0.63955
Grainin, putative OS=Entamoeba histolytica HM-1:IMSS OX=294381 GN=EHI_120360 PE=4 SV=1	B1N4A1 (+2)	EHI_120360	25 kDa	0	0	0	1.2447	1.4327	1.2791
Copine, putative OS=Entamoeba histolytica HM-1:IMSS OX=294381 GN=EHI_140260 PE=4 SV=1	C4M474 (+2)	EHI_140260	31 kDa	0	0	0	0	0	0
Steroid 5-alpha reductase, putative OS=Entamoeba histolytica HM-1:IMSS OX=294381 GN=EHI_076870 PE=3 SV=1	C4M2S8 (+2)	EHI_076870	34 kDa	0	0	0	1.2447	1.4327	0.63955
Calmodulin, putative OS=Entamoeba histolytica HM-1:IMSS OX=294381 GN=EHI_000130 PE=4 SV=1	C4MB98	EHI_000130	17 kDa	0	0	5.987	0.62236	1.4327	0
NAD(FAD)-dependent dehydrogenase, putative OS=Entamoeba histolytica HM-1:IMSS OX=294381 GN=EHI_099700 PE=4 SV=1	C4M6H3	EHI_099700	116 kDa	0	2.7624	2.9935	0	0	0
HECT domain and RCC1-like domain-containing protein, putative (Fragment) OS=Entamoeba histolytica HM-1:IMSS OX=294381 GN=EHI_030610 PE=4 SV=1	B1N591 (+3)	EHI_030610	20 kDa	0	0	0	0.62236	0	0.63955
Actin, putative OS=Entamoeba histolytica HM-1:IMSS OX=294381 GN=EHI_131230 PE=3 SV=1	C4LXI9 (+1)	EHI_131230	97 kDa	0	0	0	0.62236	0	0.63955
Adenosylhomocysteinase OS=Entamoeba histolytica HM-1:IMSS OX=294381 GN=EHI_068250 PE=3 SV=1	C4LU18 (+2)	EHI_068250	52 kDa	0	2.7624	5.987	0	0.71637	0.63955
Calmodulin, putative OS=Entamoeba histolytica HM-1:IMSS OX=294381 GN=EHI_044820 PE=4 SV=1	C4LTA1 (+1)	EHI_044820	17 kDa	0	0	0	0	0.71637	0
Uncharacterized protein OS=Entamoeba histolytica HM-1:IMSS OX=294381 GN=EHI_129500 PE=4 SV=1	B1N4P8 (+2)	EHI_129500	18 kDa	0	0	0	0.62236	0.71637	0.63955
Protein HIRA OS=Entamoeba histolytica HM-1:IMSS OX=294381 GN=EHI_056440 PE=3 SV=1	C4M6Z3 (+2)	EHI_056440	87 kDa	0	0	0	0	0	0.63955
Proliferating-cell nucleolar antigen p120, putative OS=Entamoeba histolytica HM-1:IMSS OX=294381 GN=EHI_198880 PE=3 SV=1	C4LWT4 (+2)	EHI_198880	55 kDa	0	0	0	1.2447	0.71637	0.63955
Helicase, putative OS=Entamoeba histolytica HM-1:IMSS OX=294381 GN=EHI_053080 PE=4 SV=1	C4M3C6 (+2)	EHI_053080	60 kDa	0	0	0	0.62236	0	0
Uncharacterized protein OS=Entamoeba histolytica HM-1:IMSS OX=294381 GN=EHI_113950 PE=4 SV=1	C4M8W1	EHI_113950	36 kDa	0	0	0	0.62236	0	3.1978
40S ribosomal protein S19, putative OS=Entamoeba histolytica HM-1:IMSS OX=294381 GN=EHI_198740 PE=3 SV=1	C4LWS0 (+2)	EHI_198740	18 kDa	0	0	2.9935	0	0	0
Calreticulin OS=Entamoeba histolytica HM-1:IMSS OX=294381 GN=EHI_136160 PE=3 SV=1	C4M296 (+2)	EHI_136160	45 kDa	0	2.7624	0	0	0	0
Inorganic diphosphatase OS=Entamoeba histolytica HM-1:IMSS OX=294381 GN=EHI_124880 PE=3 SV=1	C4M982 (+2)	EHI_124880	28 kDa	0	0	0	0.62236	0.71637	0
Histone H2B OS=Entamoeba histolytica HM-1:IMSS OX=294381 GN=EHI_182990 PE=3 SV=1	C4LV75	EHI_182990	15 kDa	0	0	0	0.62236	0.71637	1.9187
Calmodulin, putative OS=Entamoeba histolytica HM-1:IMSS OX=294381 GN=EHI_100270 PE=1 SV=1	C4M0U8 (+2)	EHI_100270	17 kDa	0	0	0	1.2447	2.1491	0.63955
WD domain containing protein OS=Entamoeba histolytica HM-1:IMSS OX=294381 GN=EHI_035080 PE=4 SV=1	C4M4Z9 (+2)	EHI_035080	46 kDa	0	0	0	1.8671	1.4327	1.2791
Leucine-rich repeat containing protein OS=Entamoeba histolytica HM-1:IMSS OX=294381 GN=EHI_164460 PE=4 SV=1	B1N3D5 (+2)	EHI_164460	83 kDa	0	0	0	0	0	0
Rab family GTPase OS=Entamoeba histolytica HM-1:IMSS OX=294381 GN=EHI_059670 PE=3 SV=1	B1N3J0	EHI_059670	86 kDa	0	0	0	0	0.71637	0
Importin beta, putative OS=Entamoeba histolytica HM-1:IMSS OX=294381 GN=EHI_036520 PE=4 SV=1	C4M8F5 (+2)	EHI_036520	95 kDa	0	0	0	0.62236	0	0.63955
HEAT repeat-containing protein 1 OS=Entamoeba histolytica HM-1:IMSS OX=294381 GN=EHI_198890 PE=3 SV=1	C4LWT5 (+2)	EHI_198890	229 kDa	0	0	0	0	0	0
Cdc48-like protein, putative OS=Entamoeba histolytica HM-1:IMSS OX=294381 GN=EHI_176970 PE=4 SV=1	C4LY22 (+1)	EHI_176970	86 kDa	0	0	0	0	0	0
Rhodanese domain-containing protein OS=Entamoeba histolytica HM-1:IMSS OX=294381 GN=EHI_031950 PE=4 SV=1	C4MAW5	EHI_031950	68 kDa	0	0	0	0.62236	0.71637	0
Utp12 domain-containing protein OS=Entamoeba histolytica HM-1:IMSS OX=294381 GN=EHI_054840 PE=4 SV=1	C4M2K2 (+2)	EHI_054840	64 kDa	0	0	0	0	0.71637	0.63955
Histone deacetylase, putative OS=Entamoeba histolytica HM-1:IMSS OX=294381 GN=EHI_119320 PE=4 SV=1	A0A8U0WPW0 (+2)	EHI_119320	51 kDa	0	0	0	0.62236	0	0
Rho guanine nucleotide exchange factor, putative OS=Entamoeba histolytica HM-1:IMSS OX=294381 GN=EHI_011390 PE=4 SV=1	C4MAC2 (+2)	EHI_011390	73 kDa	0	0	0	0	0.71637	0
Insulin-like growth factor 2 receptor OS=Entamoeba histolytica HM-1:IMSS OX=294381 GN=EHI_161650 PE=4 SV=1	C4MBF6 (+2)	EHI_161650	96 kDa	0	0	0	0.62236	1.4327	0.63955
VASt domain-containing protein OS=Entamoeba histolytica HM-1:IMSS OX=294381 GN=EHI_024350 PE=4 SV=1	C4M0I0 (+2)	EHI_024350	69 kDa	0	0	0	0	0.71637	0
Uncharacterized protein OS=Entamoeba histolytica HM-1:IMSS OX=294381 GN=EHI_197450 PE=4 SV=1	C4LVG1 (+2)	EHI_197450	28 kDa	0	0	0	0.62236	0	0
Calmodulin, putative OS=Entamoeba histolytica HM-1:IMSS OX=294381 GN=EHI_117470 PE=4 SV=1	B1N2S2	EHI_117470	9 kDa	0	2.7624	0	1.8671	0.71637	1.9187
Triosephosphate isomerase OS=Entamoeba histolytica HM-1:IMSS OX=294381 GN=EHI_056480 PE=3 SV=1	C4M6Z7 (+2)	EHI_056480	28 kDa	0	2.7624	0	0	0	0
Ribosomal protein L19 OS=Entamoeba histolytica HM-1:IMSS OX=294381 GN=EHI_110340 PE=3 SV=1	C4LU86 (+5)	EHI_110340	23 kDa	0	0	0	0.62236	0	0.63955
4-alpha-glucanotransferase OS=Entamoeba histolytica HM-1:IMSS OX=294381 GN=EHI_084680 PE=3 SV=1	C4M1J9 (+2)	EHI_084680	97 kDa	0	0	0	0	0	2.5582
Auxin efflux carrier family protein, putative OS=Entamoeba histolytica HM-1:IMSS OX=294381 GN=EHI_111850 PE=3 SV=1	C4M583 (+2)	EHI_111850	60 kDa	0	0	0	0.62236	0.71637	0
Rab family GTPase OS=Entamoeba histolytica HM-1:IMSS OX=294381 GN=EHI_040310 PE=4 SV=1	A0A8U0WPB0 (+2)	EHI_040310	21 kDa	0	0	0	1.2447	1.4327	0.63955
WD_REPEATS_REGION domain-containing protein OS=Entamoeba histolytica HM-1:IMSS OX=294381 GN=EHI_069460 PE=4 SV=1	C4LWN4 (+2)	EHI_069460	80 kDa	0	0	0	1.8671	2.1491	1.2791
WW domain-containing protein OS=Entamoeba histolytica HM-1:IMSS OX=294381 GN=EHI_068340 PE=4 SV=1	C4LU27 (+2)	EHI_068340	91 kDa	0	0	0	1.8671	1.4327	1.9187
Uncharacterized protein OS=Entamoeba histolytica HM-1:IMSS-B OX=885319 GN=EHI8A_063990 PE=4 SV=1	M3UXH2 (+1)	EHI8A_063990	11 kDa	0	0	0	0	0	1.2791
Uncharacterized protein OS=Entamoeba histolytica HM-1:IMSS OX=294381 GN=EHI_183880 PE=4 SV=1	C4MAW1 (+2)	EHI_183880	28 kDa	0	0	0	0.62236	0.71637	0
Receptor mediated endocytosis protein, putative OS=Entamoeba histolytica HM-1:IMSS OX=294381 GN=EHI_105270 PE=4 SV=1	C4M131	EHI_105270	58 kDa	0	0	0	0	0	0
Grainin, putative OS=Entamoeba histolytica HM-1:IMSS OX=294381 GN=EHI_060380 PE=4 SV=1	C4M6J3 (+2)	EHI_060380	25 kDa	7.1572	0	0	0	0	0.63955
Ribonucloprotein OS=Entamoeba histolytica HM-1:IMSS OX=294381 GN=EHI_104600 PE=3 SV=1	C4LZ69 (+4)	EHI_104600	14 kDa	0	0	0	0	0.71637	0
Ribosome biogenesis regulatory protein OS=Entamoeba histolytica HM-1:IMSS OX=294381 GN=EHI_098810 PE=3 SV=1	C4M883 (+2)	EHI_098810	29 kDa	0	0	0	1.2447	1.4327	0
40S ribosomal protein S23, putative OS=Entamoeba histolytica HM-1:IMSS OX=294381 GN=EHI_020310 PE=3 SV=1	C4M5B7	EHI_020310	16 kDa	0	0	0	0	0	0
Ribosomal protein L15 (Fragment) OS=Entamoeba histolytica HM-1:IMSS-B OX=885319 GN=EHI8A_170770 PE=3 SV=1	M3UM91 (+1)	EHI8A_170770	22 kDa	0	0	0	0.62236	0	0
40S ribosomal protein S25 OS=Entamoeba histolytica HM-1:IMSS OX=294381 GN=EHI_074800 PE=3 SV=1	C4M9F4	EHI_074800	15 kDa	0	0	0	0	0	0
F-box domain-containing protein OS=Entamoeba histolytica HM-1:IMSS OX=294381 GN=EHI_165310 PE=4 SV=1	C4M209 (+2)	EHI_165310	74 kDa	0	0	0	0	0.71637	1.2791
NUC153 domain-containing protein OS=Entamoeba histolytica HM-1:IMSS OX=294381 GN=EHI_097980 PE=3 SV=1	B1N3N6 (+2)	EHI_097980	67 kDa	0	0	0	1.2447	0.71637	0.63955
Superoxide dismutase OS=Entamoeba histolytica HM-1:IMSS OX=294381 GN=EHI_159160 PE=3 SV=1	C4LX20	EHI_159160	22 kDa	0	2.7624	0	0	0	0
Guanine nucleotide-binding protein subunit beta 2-like 1, putative OS=Entamoeba histolytica HM-1:IMSS OX=294381 GN=EHI_110400 PE=3 SV=1	C4LU92	EHI_110400	35 kDa	0	0	2.9935	1.2447	1.4327	0
Histone deacetylase HDT1-like OS=Entamoeba histolytica HM-1:IMSS OX=294381 GN=EHI_125630 PE=4 SV=1	C4LVV1 (+2)	EHI_125630	17 kDa	0	0	0	0.62236	0	1.2791
Ras family GTPase OS=Entamoeba histolytica HM-1:IMSS OX=294381 GN=EHI_198330 PE=3 SV=1	C4MA96 (+2)	EHI_198330	23 kDa	0	0	0	1.8671	2.1491	1.2791
Venom polypeptide OS=Entamoeba histolytica HM-1:IMSS OX=294381 GN=EHI_188850 PE=4 SV=1	C4M2V2 (+2)	EHI_188850	26 kDa	0	0	0	0	0	0.63955
Protein BIG1 OS=Entamoeba histolytica HM-1:IMSS OX=294381 GN=EHI_044360 PE=4 SV=1	C4M783 (+2)	EHI_044360	30 kDa	0	0	0	0	0.71637	0.63955
Syntaxin, putative OS=Entamoeba histolytica HM-1:IMSS OX=294381 GN=EHI_139030 PE=4 SV=1	A0A8U0WNX3 (+2)	EHI_139030	35 kDa	0	0	0	0.62236	1.4327	0.63955
Uncharacterized protein OS=Entamoeba histolytica HM-1:IMSS OX=294381 GN=EHI_104580 PE=4 SV=1	C4LZ67 (+2)	EHI_104580	29 kDa	0	0	0	0	0.71637	1.2791
Uncharacterized protein OS=Entamoeba histolytica HM-1:IMSS OX=294381 GN=EHI_194870 PE=4 SV=1	C4M402	EHI_194870	71 kDa	0	0	0	1.2447	0	0
Uncharacterized protein OS=Entamoeba histolytica HM-1:IMSS OX=294381 GN=EHI_035190 PE=4 SV=1	B1N3R8 (+2)	EHI_035190	14 kDa	0	0	0	0.62236	0	0.63955
ATP-binding cassette protein, putative OS=Entamoeba histolytica HM-1:IMSS OX=294381 GN=EHI_178580 PE=4 SV=1	B1N2M5	EHI_178580	154 kDa	0	0	0	0	0	0
Ras GTPase activating protein, putative OS=Entamoeba histolytica HM-1:IMSS OX=294381 GN=EHI_035800 PE=4 SV=1	C4LY07 (+2)	EHI_035800	90 kDa	0	0	0	0.62236	0.71637	1.2791
Utp12 domain-containing protein OS=Entamoeba histolytica HM-1:IMSS OX=294381 GN=EHI_054170 PE=4 SV=1	C4M6U2 (+2)	EHI_054170	64 kDa	0	0	0	0	0	0
WD_REPEATS_REGION domain-containing protein OS=Entamoeba histolytica HM-1:IMSS OX=294381 GN=EHI_017010 PE=4 SV=1	C4MAK3 (+2)	EHI_017010	52 kDa	0	0	0	1.8671	0.71637	0.63955
AAA domain-containing protein OS=Entamoeba histolytica HM-1:IMSS-B OX=885319 GN=EHI8A_039970 PE=4 SV=1	M3UZW6	EHI8A_039970	60 kDa	0	0	0	0.62236	0.71637	0
TSNAXIP1_N domain-containing protein OS=Entamoeba histolytica HM-1:IMSS OX=294381 GN=EHI_193460 PE=4 SV=1	C4M4V0 (+2)	EHI_193460	58 kDa	0	0	0	0.62236	0	0
Rab family GTPase OS=Entamoeba histolytica HM-1:IMSS OX=294381 GN=EHI_177520 PE=4 SV=1	A0A8U0WPU0	EHI_177520	23 kDa	0	0	0	0	0	0
Alpha-NAC protein, putative OS=Entamoeba histolytica HM-1:IMSS OX=294381 GN=EHI_083250 PE=4 SV=1	C4M758	EHI_083250	24 kDa	0	2.7624	0	0.62236	1.4327	0
Gelsolin repeat protein, putative OS=Entamoeba histolytica HM-1:IMSS OX=294381 GN=EHI_009570 PE=4 SV=1	C4LZ32 (+2)	EHI_009570	169 kDa	0	0	0	0.62236	0	2.5582
Uncharacterized protein OS=Entamoeba histolytica HM-1:IMSS OX=294381 GN=EHI_109990 PE=4 SV=1	C4M3L7 (+2)	EHI_109990	27 kDa	0	0	0	0.62236	0.71637	1.2791
26S protease regulatory subunit 7, putative OS=Entamoeba histolytica HM-1:IMSS OX=294381 GN=EHI_080890 PE=3 SV=1	B1N4Q6 (+2)	EHI_080890	47 kDa	0	0	0	0.62236	0.71637	0
C2 domain containing protein OS=Entamoeba histolytica HM-1:IMSS OX=294381 GN=EHI_118130 PE=3 SV=1	C4LYZ7 (+2)	EHI_118130	42 kDa	0	0	0	1.2447	0.71637	0.63955
Leucine-rich repeat containing protein OS=Entamoeba histolytica HM-1:IMSS OX=294381 GN=EHI_119950 PE=4 SV=1	C4M989 (+2)	EHI_119950	41 kDa	0	0	0	0	0.71637	0.63955
Periplasmic protein OS=Entamoeba histolytica HM-1:IMSS OX=294381 GN=EHI_022970 PE=4 SV=1	C4LUL0 (+2)	EHI_022970	20 kDa	0	0	0	0	0	0
Leucine-rich repeat containing protein OS=Entamoeba histolytica HM-1:IMSS OX=294381 GN=EHI_024640 PE=4 SV=1	C4M0K6 (+2)	EHI_024640	56 kDa	0	0	0	0.62236	0.71637	1.2791
DnaJ family protein OS=Entamoeba histolytica HM-1:IMSS OX=294381 GN=EHI_022950 PE=3 SV=1	C4LUK8 (+2)	EHI_022950	41 kDa	0	0	0	0	0	0
Reverse transcriptase domain-containing protein OS=Entamoeba histolytica HM-1:IMSS OX=294381 GN=EHI_109000 PE=3 SV=1	C4M7E0	EHI_109000	66 kDa	0	0	0	0.62236	0	0
Putative rRNA methyltransferase OS=Entamoeba histolytica HM-1:IMSS OX=294381 GN=EHI_088070 PE=3 SV=1	C4M6R5 (+2)	EHI_088070	96 kDa	0	0	0	0	0	0
Actophorin, putative OS=Entamoeba histolytica HM-1:IMSS OX=294381 GN=EHI_197480 PE=3 SV=1	C4LVG4 (+2)	EHI_197480	16 kDa	0	0	2.9935	0	0.71637	0
NAC-A/B domain-containing protein OS=Entamoeba histolytica HM-1:IMSS OX=294381 GN=EHI_048560 PE=4 SV=1	C4M2W9 (+2)	EHI_048560	19 kDa	0	0	5.987	0	0	0
60S ribosomal protein L10a, putative OS=Entamoeba histolytica HM-1:IMSS OX=294381 GN=EHI_012480 PE=3 SV=1	B1N2I7	EHI_012480	24 kDa	0	0	0	0.62236	0	0
Eukaryotic translation initiation factor 6 OS=Entamoeba histolytica HM-1:IMSS OX=294381 GN=EIF6 PE=3 SV=1	C4M2Q1 (+2)	EIF6	26 kDa	0	0	0	1.2447	1.4327	0
Axoneme-associated protein mst101 OS=Entamoeba histolytica HM-1:IMSS OX=294381 GN=EHI_049670 PE=4 SV=1	C4LUG8 (+2)	EHI_049670	94 kDa	0	0	0	0	0	0.63955
MIB/HERC2 domain-containing protein OS=Entamoeba histolytica HM-1:IMSS OX=294381 GN=EHI_181140 PE=4 SV=1	C4M602 (+2)	EHI_181140	25 kDa	0	0	0	0.62236	0.71637	0.63955
DNA double-strand break repair Rad50 ATPase OS=Entamoeba histolytica HM-1:IMSS OX=294381 GN=EHI_008630 PE=4 SV=1	C4M0M7 (+2)	EHI_008630	69 kDa	0	0	0	0	0	0
HEAT repeat domain containing protein OS=Entamoeba histolytica HM-1:IMSS OX=294381 GN=EHI_050150 PE=4 SV=1	C4LTQ2	EHI_050150	78 kDa	0	0	0	0	0	0.63955
Serine/threonine-protein kinase PLK OS=Entamoeba histolytica HM-1:IMSS OX=294381 GN=EHI_008410 PE=3 SV=1	C4M0L7 (+2)	EHI_008410	62 kDa	0	0	0	0	0	0
Importin beta-3 family protein, putative OS=Entamoeba histolytica HM-1:IMSS OX=294381 GN=EHI_098400 PE=4 SV=1	C4LXC2 (+2)	EHI_098400	126 kDa	0	0	0	0	0	0
Cullin, putative OS=Entamoeba histolytica HM-1:IMSS OX=294381 GN=EHI_118180 PE=3 SV=1	C4LZ01 (+2)	EHI_118180	87 kDa	0	0	0	0.62236	0	0
Transmembrane protein OS=Entamoeba histolytica HM-1:IMSS OX=294381 GN=EHI_069270 PE=4 SV=1	C4LWL5 (+1)	EHI_069270	57 kDa	0	0	0	0	0	0
Folliculin domain-containing protein OS=Entamoeba histolytica HM-1:IMSS OX=294381 GN=EHI_110430 PE=4 SV=1	C4LU95 (+2)	EHI_110430	103 kDa	0	0	0	0	0	0
Nucleolar GTP-binding protein 2 OS=Entamoeba histolytica HM-1:IMSS OX=294381 GN=EHI_164370 PE=3 SV=1	C4M1R9 (+1)	EHI_164370	71 kDa	0	0	0	0	0	0
Actin-binding protein, cofilin/tropomyosin family OS=Entamoeba histolytica HM-1:IMSS OX=294381 GN=EHI_186840 PE=4 SV=1	C4LVQ1 (+2)	EHI_186840	16 kDa	0	0	0	0.62236	1.4327	0.63955
Uncharacterized protein OS=Entamoeba histolytica HM-1:IMSS OX=294381 GN=EHI_099720 PE=4 SV=1	C4M6H5	EHI_099720	14 kDa	0	0	0	0.62236	0	0
Serine-rich protein OS=Entamoeba histolytica HM-1:IMSS OX=294381 GN=EHI_116360 PE=4 SV=1	C4MBR8	EHI_116360	25 kDa	0	5.5249	2.9935	0.62236	0.71637	0
TLDc domain-containing protein OS=Entamoeba histolytica HM-1:IMSS OX=294381 GN=EHI_161020 PE=4 SV=1	C4M2R9 (+2)	EHI_161020	46 kDa	0	0	0	1.2447	0.71637	0.63955
FHA domain-containing protein OS=Entamoeba histolytica HM-1:IMSS OX=294381 GN=EHI_149010 PE=4 SV=1	C4LT67 (+2)	EHI_149010	26 kDa	0	0	0	0	0	0
EF-hand calcium-binding domain containing protein OS=Entamoeba histolytica HM-1:IMSS OX=294381 GN=EHI_197510 PE=4 SV=1	C4LVG7 (+2)	EHI_197510	30 kDa	0	0	0	0	0	0
Ubiquitin-like protein OS=Entamoeba histolytica HM-1:IMSS OX=294381 GN=EHI_170060 PE=4 SV=1	C4M1C8 (+2)	EHI_170060	13 kDa	0	0	0	0.62236	0.71637	0.63955
Uncharacterized protein OS=Entamoeba histolytica HM-1:IMSS OX=294381 GN=EHI_164800 PE=4 SV=1	C4M1X3 (+2)	EHI_164800	101 kDa	0	0	0	0	0.71637	0
High-affinity potassium uptake transporter, putative OS=Entamoeba histolytica HM-1:IMSS OX=294381 GN=EHI_199020 PE=4 SV=1	C4LWU8 (+2)	EHI_199020	83 kDa	0	0	0	0.62236	0.71637	1.2791
SH3 domain-containing protein OS=Entamoeba histolytica HM-1:IMSS OX=294381 GN=EHI_054800 PE=4 SV=1	C4M2J9 (+2)	EHI_054800	55 kDa	0	0	0	1.8671	0.71637	1.2791
Multidrug resistance protein, putative OS=Entamoeba histolytica HM-1:IMSS OX=294381 GN=EHI_100320 PE=4 SV=1	C4M0V2 (+2)	EHI_100320	182 kDa	0	0	0	0	0	0
Ribosome production factor 2 homolog OS=Entamoeba histolytica HM-1:IMSS OX=294381 GN=EHI_029200 PE=3 SV=1	C4MAW7	EHI_029200	34 kDa	0	0	0	0	0	0
40S ribosomal protein S27 OS=Entamoeba histolytica HM-1:IMSS OX=294381 GN=EHI_149000 PE=3 SV=1	C4LT66 (+1)	EHI_149000	9 kDa	0	0	0	0.62236	0.71637	0.63955
40S ribosomal protein S21 OS=Entamoeba histolytica HM-1:IMSS OX=294381 GN=EHI_126870 PE=3 SV=1	C4LWW3 (+2)	EHI_126870	10 kDa	7.1572	5.5249	2.9935	0	0	0
LIM zinc finger domain containing protein OS=Entamoeba histolytica HM-1:IMSS OX=294381 GN=EHI_096420 PE=4 SV=1	C4LWF5 (+2)	EHI_096420	16 kDa	7.1572	2.7624	5.987	0	0	0
Rab family GTPase OS=Entamoeba histolytica HM-1:IMSS OX=294381 GN=EHI_108610 PE=4 SV=1	A0A8U0WPG2 (+1)	EHI_108610	23 kDa	0	0	0	0.62236	0.71637	0
Clathrin coat assembly protein, putative OS=Entamoeba histolytica HM-1:IMSS OX=294381 GN=EHI_135430 PE=4 SV=1	A0A8U0WQ23 (+1)	EHI_135430	46 kDa	0	0	0	0.62236	0.71637	0
Cysteine desulfurase, putative OS=Entamoeba histolytica HM-1:IMSS OX=294381 GN=EHI_136380 PE=4 SV=1	A0A8U0WPM8 (+2)	EHI_136380	43 kDa	0	0	5.987	0.62236	0	0
Uncharacterized protein OS=Entamoeba histolytica HM-1:IMSS OX=294381 GN=EHI_059830 PE=4 SV=1	C4M342 (+2)	EHI_059830	99 kDa	0	0	0	0.62236	0	0
UEV domain-containing protein OS=Entamoeba histolytica HM-1:IMSS OX=294381 GN=EHI_135460 PE=4 SV=1	C4M9S4 (+2)	EHI_135460	56 kDa	0	0	0	1.2447	0.71637	1.2791
20 kDa antigen, putative OS=Entamoeba histolytica HM-1:IMSS OX=294381 GN=EHI_056490 PE=4 SV=1	C4M6Y3 (+2)	EHI_056490	21 kDa	0	0	0	0	0	0
MSC domain-containing protein OS=Entamoeba histolytica HM-1:IMSS OX=294381 GN=EHI_124620 PE=4 SV=1	C4LZJ6 (+2)	EHI_124620	187 kDa	0	0	0	0	1.4327	1.2791
Tho2 domain-containing protein OS=Entamoeba histolytica HM-1:IMSS OX=294381 GN=EHI_052850 PE=4 SV=1	C4M3S4 (+2)	EHI_052850	87 kDa	0	0	0	1.2447	0.71637	0
PHR domain-containing protein OS=Entamoeba histolytica HM-1:IMSS OX=294381 GN=EHI_109980 PE=4 SV=1	C4M3L6 (+2)	EHI_109980	79 kDa	0	0	0	0	0	0
Receptor protein serine/threonine kinase OS=Entamoeba histolytica HM-1:IMSS OX=294381 GN=EHI_174100 PE=3 SV=1	C4M258 (+2)	EHI_174100	76 kDa	0	0	0	0.62236	0.71637	0.63955
Tyrosine kinase, putative OS=Entamoeba histolytica HM-1:IMSS-B OX=885319 GN=EHI8A_044120 PE=4 SV=1	M3TMB9	EHI8A_044120	138 kDa	0	0	0	0	0.71637	0
Brix domain containing protein OS=Entamoeba histolytica HM-1:IMSS OX=294381 GN=EHI_012190 PE=4 SV=1	C4LTL2 (+1)	EHI_012190	41 kDa	0	0	0	1.8671	0	0
Uncharacterized protein OS=Entamoeba histolytica HM-1:IMSS OX=294381 GN=EHI_041070 PE=4 SV=1	C4MAD2 (+1)	EHI_041070	53 kDa	0	0	0	0	0	1.2791
WW domain-containing protein OS=Entamoeba histolytica HM-1:IMSS OX=294381 GN=EHI_011550 PE=4 SV=1	C4M9J1 (+2)	EHI_011550	70 kDa	0	0	0	0	0	0
ATP-dependent RNA helicase OS=Entamoeba histolytica HM-1:IMSS OX=294381 GN=EHI_069410 PE=3 SV=1	C4LWM9 (+2)	EHI_069410	79 kDa	0	0	0	0.62236	0.71637	0
60S ribosomal protein L31, putative OS=Entamoeba histolytica HM-1:IMSS OX=294381 GN=EHI_068200 PE=3 SV=1	C4LU13 (+2)	EHI_068200	17 kDa	0	0	0	0.62236	0	0.63955
LIM zinc finger domain containing protein OS=Entamoeba histolytica HM-1:IMSS OX=294381 GN=EHI_194520 PE=4 SV=1	C4LZW4 (+2)	EHI_194520	16 kDa	0	5.5249	2.9935	0	0	1.2791
TLDc domain-containing protein OS=Entamoeba histolytica HM-1:IMSS OX=294381 GN=EHI_201420 PE=4 SV=1	B1N569	EHI_201420	41 kDa	0	0	0	0	0	0
DEAD/DEAH box helicase, putative OS=Entamoeba histolytica HM-1:IMSS OX=294381 GN=EHI_093900 PE=3 SV=1	C4LYI1 (+2)	EHI_093900	44 kDa	0	0	0	0	0	0
EF-hand calcium-binding domain containing protein OS=Entamoeba histolytica HM-1:IMSS OX=294381 GN=EHI_148810 PE=4 SV=1	B1N2G5 (+2)	EHI_148810	35 kDa	0	0	0	0.62236	1.4327	0.63955
Flagellar hook-length control protein FliK OS=Entamoeba histolytica HM-1:IMSS OX=294381 GN=EHI_138350 PE=4 SV=1	C4M3H7 (+2)	EHI_138350	19 kDa	0	0	0	1.2447	0.71637	0.63955
Nucleoside transporter, putative OS=Entamoeba histolytica HM-1:IMSS OX=294381 GN=EHI_110730 PE=3 SV=1	C4LUC0 (+2)	EHI_110730	56 kDa	0	0	0	0.62236	0.71637	0
DEAD/DEAH box helicase, putative OS=Entamoeba histolytica HM-1:IMSS OX=294381 GN=EHI_078560 PE=4 SV=1	C4M4E5 (+2)	EHI_078560	63 kDa	0	0	0	0.62236	0	0.63955
Dipeptidyl-peptidase, putative OS=Entamoeba histolytica HM-1:IMSS OX=294381 GN=EHI_182720 PE=4 SV=1	C4LV53 (+2)	EHI_182720	76 kDa	0	0	0	0	2.1491	0.63955
Rab GTPase activating protein, putative OS=Entamoeba histolytica HM-1:IMSS OX=294381 GN=EHI_165290 PE=4 SV=1	C4M207 (+2)	EHI_165290	73 kDa	0	0	0	0	0.71637	0.63955
BRCT domain-containing protein OS=Entamoeba histolytica HM-1:IMSS OX=294381 GN=EHI_053100 PE=4 SV=1	C4M3C8 (+2)	EHI_053100	103 kDa	0	0	0	2.4895	0.71637	0.63955
Villidin, putative OS=Entamoeba histolytica HM-1:IMSS OX=294381 GN=EHI_150430 PE=4 SV=1	C4M224 (+2)	EHI_150430	195 kDa	0	0	0	1.8671	0.71637	0
Protein kinase, putative OS=Entamoeba histolytica HM-1:IMSS OX=294381 GN=EHI_011510 PE=4 SV=1	C4M9I7 (+2)	EHI_011510	48 kDa	0	0	0	0	0	0
DNA-directed RNA polymerase subunit beta OS=Entamoeba histolytica HM-1:IMSS OX=294381 GN=EHI_022940 PE=3 SV=1	C4LUK7 (+2)	EHI_022940	132 kDa	0	0	0	1.2447	0	0
Thioredoxin domain-containing protein OS=Entamoeba histolytica HM-1:IMSS OX=294381 GN=EHI_018950 PE=4 SV=1	B1N4T1	EHI_018950	83 kDa	0	0	0	0	0	0
Rho family GTPase OS=Entamoeba histolytica HM-1:IMSS OX=294381 GN=EHI_181250 PE=3 SV=1	C4M5Z7 (+5)	EHI_181250	22 kDa	0	0	0	0	0	0
WD domain containing protein OS=Entamoeba histolytica HM-1:IMSS OX=294381 GN=EHI_103620 PE=3 SV=1	C4LVK6 (+2)	EHI_103620	45 kDa	0	0	0	0.62236	0.71637	0
AIG1 family protein, putative OS=Entamoeba histolytica HM-1:IMSS OX=294381 GN=EHI_180390 PE=4 SV=1	C4M288 (+2)	EHI_180390	39 kDa	0	0	0	0.62236	0.71637	0.63955
Actin-related protein 2/3 complex subunit 5 OS=Entamoeba histolytica HM-1:IMSS OX=294381 GN=EHI_103440 PE=3 SV=1	B1N2Q5 (+2)	EHI_103440	15 kDa	0	0	0	0	0.71637	0
Adaptor protein (AP) family protein OS=Entamoeba histolytica HM-1:IMSS OX=294381 GN=EHI_023600 PE=4 SV=1	A0A8U0WPZ3 (+2)	EHI_023600	81 kDa	0	0	0	0.62236	0	0.63955
Axoneme-associated protein mst101(2)-like OS=Entamoeba histolytica HM-1:IMSS OX=294381 GN=EHI_096360 PE=4 SV=1	C4LWE9 (+2)	EHI_096360	51 kDa	0	0	0	0	0	1.2791
T-complex protein 1 subunit delta OS=Entamoeba histolytica HM-1:IMSS OX=294381 GN=EHI_114120 PE=3 SV=1	C4M419 (+1)	EHI_114120	58 kDa	0	0	0	0.62236	0	0
Ribosomal protein L1 OS=Entamoeba histolytica HM-1:IMSS-B OX=885319 GN=EHI8A_208740 PE=4 SV=1	M3TSU2 (+1)	EHI8A_208740	33 kDa	0	0	0	0	0	0
NPL domain-containing protein OS=Entamoeba histolytica HM-1:IMSS OX=294381 GN=EHI_178460 PE=4 SV=1	C4LUR2 (+2)	EHI_178460	22 kDa	0	0	0	0	0	0
Myosin-2 heavy chain, putative OS=Entamoeba histolytica HM-1:IMSS OX=294381 GN=EHI_014010 PE=4 SV=1	B1N2X4 (+1)	EHI_014010	82 kDa	0	0	0	0	0	0.63955
DNA double-strand break repair Rad50 ATPase OS=Entamoeba histolytica HM-1:IMSS OX=294381 GN=EHI_133540 PE=4 SV=1	C4M1L8 (+2)	EHI_133540	74 kDa	0	0	0	0	0	0
Rab family GTPase OS=Entamoeba histolytica HM-1:IMSS OX=294381 GN=EHI_127380 PE=4 SV=1	A0A8U0WQ04 (+2)	EHI_127380	23 kDa	0	0	0	0	0	0
26S protease regulatory subunit, putative OS=Entamoeba histolytica HM-1:IMSS OX=294381 GN=EHI_185410 PE=3 SV=1	C4M8D7 (+1)	EHI_185410	45 kDa	0	0	0	0	0	0
Secreted protein (Fragment) OS=Entamoeba histolytica HM-1:IMSS OX=294381 GN=EHI_089000 PE=4 SV=1	B1N589	EHI_089000	54 kDa	0	0	0	0	0	0
Lipase_3 domain-containing protein OS=Entamoeba histolytica HM-1:IMSS OX=294381 GN=EHI_032470 PE=4 SV=1	C4MB72	EHI_032470	95 kDa	0	0	0	1.2447	1.4327	0
Uncharacterized protein OS=Entamoeba histolytica HM-1:IMSS OX=294381 GN=EHI_017750 PE=4 SV=1	C4M3F8 (+1)	EHI_017750	21 kDa	0	0	0	0	0	0.63955
Alcohol dehydrogenase, putative OS=Entamoeba histolytica HM-1:IMSS OX=294381 GN=EHI_125950 PE=3 SV=1	C4LVY0 (+2)	EHI_125950	42 kDa	0	0	0	1.2447	0	0
MIR domain protein OS=Entamoeba histolytica HM-1:IMSS OX=294381 GN=EHI_100480 PE=4 SV=1	C4M0T6 (+2)	EHI_100480	23 kDa	0	0	0	0	0	0
Uncharacterized protein OS=Entamoeba histolytica HM-1:IMSS OX=294381 GN=EHI_134980 PE=4 SV=1	C4M0Y5 (+2)	EHI_134980	97 kDa	0	0	0	0.62236	0.71637	0
DNA double-strand break repair Rad50 ATPase OS=Entamoeba histolytica HM-1:IMSS OX=294381 GN=EHI_186800 PE=4 SV=1	C4LVP7 (+2)	EHI_186800	109 kDa	0	0	0	0	0	0
Tho2 domain-containing protein OS=Entamoeba histolytica HM-1:IMSS OX=294381 GN=EHI_185590 PE=4 SV=1	C4M8D0 (+2)	EHI_185590	117 kDa	0	0	0	1.2447	0.71637	0
Guanylate-binding protein, putative OS=Entamoeba histolytica HM-1:IMSS OX=294381 GN=EHI_093930 PE=4 SV=1	C4LYI4 (+2)	EHI_093930	88 kDa	0	0	0	0	0	0
Pore-forming peptide ameobapore A, putative OS=Entamoeba histolytica HM-1:IMSS OX=294381 GN=EHI_159480 PE=4 SV=1	C4LX30 (+2)	EHI_159480	11 kDa	0	0	0	0	0	0.63955
40S ribosomal protein S15, putative OS=Entamoeba histolytica HM-1:IMSS OX=294381 GN=EHI_064570 PE=3 SV=1	C4M0C6 (+5)	EHI_064570	16 kDa	0	0	0	0	0	0
Aminoacyl-histidine dipeptidase, putative OS=Entamoeba histolytica HM-1:IMSS OX=294381 GN=EHI_042170 PE=4 SV=1	C4M4H1 (+2)	EHI_042170	57 kDa	0	0	0	0	0	0
DUF1899 domain-containing protein OS=Entamoeba histolytica HM-1:IMSS OX=294381 GN=EHI_170130 PE=4 SV=1	C4M1D5 (+2)	EHI_170130	13 kDa	0	0	0	0	1.4327	0.63955
Uncharacterized protein OS=Entamoeba histolytica HM-1:IMSS OX=294381 GN=EHI_052720 PE=4 SV=1	B1N3L4 (+2)	EHI_052720	23 kDa	0	0	0	0.62236	1.4327	0
Uncharacterized protein OS=Entamoeba histolytica HM-1:IMSS OX=294381 GN=EHI_035510 PE=4 SV=1	C4LXY2 (+2)	EHI_035510	29 kDa	0	0	0	1.2447	1.4327	0.63955
RNA recognition motif domain containing protein OS=Entamoeba histolytica HM-1:IMSS OX=294381 GN=EHI_009470 PE=4 SV=1	C4LZ24 (+2)	EHI_009470	20 kDa	0	0	0	0	0	0.63955
Vacuolar sorting protein VPS4, putative OS=Entamoeba histolytica HM-1:IMSS OX=294381 GN=EHI_118900 PE=3 SV=1	C4LYN8 (+2)	EHI_118900	47 kDa	0	0	0	0.62236	0	1.2791
Rho family GTPase OS=Entamoeba histolytica HM-1:IMSS OX=294381 GN=EHI_015440 PE=3 SV=1	C4M0Y0 (+1)	EHI_015440	24 kDa	0	0	0	0	0.71637	0.63955
AIG1 family protein, putative (Fragment) OS=Entamoeba histolytica HM-1:IMSS OX=294381 GN=EHI_109120 PE=4 SV=1	B1N607	EHI_109120	23 kDa	0	0	0	1.2447	0.71637	0.63955
PX domain-containing protein OS=Entamoeba histolytica HM-1:IMSS OX=294381 GN=EHI_131140 PE=4 SV=1	C4LXI2 (+2)	EHI_131140	100 kDa	0	0	0	0.62236	0.71637	0
Cell division control protein, putative OS=Entamoeba histolytica HM-1:IMSS OX=294381 GN=EHI_105300 PE=3 SV=1	C4M134 (+2)	EHI_105300	36 kDa	0	0	0	0.62236	0.71637	0
Adaptor protein (AP) family protein OS=Entamoeba histolytica HM-1:IMSS OX=294381 GN=EHI_013040 PE=3 SV=1	B1N2V8 (+2)	EHI_013040	123 kDa	0	0	0	0.62236	0	0
26S protease regulatory subunit, putative OS=Entamoeba histolytica HM-1:IMSS OX=294381 GN=EHI_053020 PE=3 SV=1	C4M3C0 (+2)	EHI_053020	47 kDa	0	0	0	0	0	0
DUF148 domain-containing protein OS=Entamoeba histolytica HM-1:IMSS OX=294381 GN=EHI_025890 PE=4 SV=1	B1N4D8 (+2)	EHI_025890	26 kDa	0	0	0	0	0	0.63955
Glycogen debranching enzyme, putative OS=Entamoeba histolytica HM-1:IMSS OX=294381 GN=EHI_098360 PE=4 SV=1	C4LXB9 (+2)	EHI_098360	166 kDa	0	0	0	0	0	0
Helicase ATP-binding domain-containing protein OS=Entamoeba histolytica HM-1:IMSS OX=294381 GN=EHI_130890 PE=4 SV=1	C4LXF7 (+2)	EHI_130890	112 kDa	0	0	0	1.2447	0	0
CG10680 protein (Fragment) OS=Entamoeba histolytica HM-1:IMSS-B OX=885319 GN=EHI8A_153800 PE=4 SV=1	M3ULN4	EHI8A_153800	13 kDa	0	0	0	0	0	0
Sporozoite surface protein 2-like OS=Entamoeba histolytica HM-1:IMSS OX=294381 GN=EHI_178970 PE=4 SV=1	C4LUW0	EHI_178970	57 kDa	0	0	0	1.2447	0.71637	0
5'-3' exoribonuclease OS=Entamoeba histolytica HM-1:IMSS OX=294381 GN=EHI_128220 PE=3 SV=1	B1N3S5	EHI_128220	102 kDa	0	0	0	0	0	0
Histone H3, putative OS=Entamoeba histolytica HM-1:IMSS OX=294381 GN=EHI_096650 PE=3 SV=1	C4LWH7 (+2)	EHI_096650	16 kDa	0	0	0	0	0	0
TolA-like protein, putative OS=Entamoeba histolytica HM-1:IMSS OX=294381 GN=EHI_052780 PE=4 SV=1	C4M3R7 (+1)	EHI_052780	38 kDa	0	5.5249	0	0.62236	0	0
RPW8 domain-containing protein OS=Entamoeba histolytica HM-1:IMSS OX=294381 GN=EHI_136410 PE=4 SV=1	C4M2B0 (+2)	EHI_136410	35 kDa	0	0	0	0	0	0
Hyphal_reg_CWP domain-containing protein OS=Entamoeba histolytica HM-1:IMSS OX=294381 GN=EHI_151580 PE=4 SV=1	C4LSJ9 (+2)	EHI_151580	49 kDa	0	0	0	0	0	0
Transmembrane protein OS=Entamoeba histolytica HM-1:IMSS OX=294381 GN=EHI_008120 PE=4 SV=1	C4LYE6 (+2)	EHI_008120	37 kDa	0	0	0	1.2447	0.71637	0.63955
DNA double-strand break repair Rad50 ATPase OS=Entamoeba histolytica HM-1:IMSS OX=294381 GN=EHI_058110 PE=4 SV=1	C4M8B2 (+2)	EHI_058110	71 kDa	0	0	0	0	0	0
Uncharacterized protein OS=Entamoeba histolytica HM-1:IMSS-B OX=885319 GN=EHI8A_080480 PE=4 SV=1	M3S8Z8	EHI8A_080480	41 kDa	0	0	0	0.62236	0.71637	0.63955
Sjogrens syndrome scleroderma autoantigen 1 OS=Entamoeba histolytica HM-1:IMSS OX=294381 GN=EHI_006840 PE=4 SV=1	C4M0F7 (+2)	EHI_006840	26 kDa	0	0	0	0.62236	0.71637	0
DUF4047 domain-containing protein OS=Entamoeba histolytica HM-1:IMSS OX=294381 GN=EHI_093740 PE=4 SV=1	C4LYG5 (+2)	EHI_093740	37 kDa	0	0	0	0.62236	0.71637	0.63955
Rho guanine nucleotide exchange factor, putative OS=Entamoeba histolytica HM-1:IMSS-A OX=885318 GN=EHI7A_017670 PE=4 SV=1	N9TNQ0	EHI7A_017670	62 kDa	0	0	0	0.62236	0	0.63955
NUC173 domain-containing protein OS=Entamoeba histolytica HM-1:IMSS OX=294381 GN=EHI_030450 PE=3 SV=1	C4M457 (+2)	EHI_030450	107 kDa	0	0	0	0	1.4327	0.63955
Midasin OS=Entamoeba histolytica HM-1:IMSS OX=294381 GN=EHI_153780 PE=3 SV=1	C4LSF8 (+1)	EHI_153780	520 kDa	0	0	0	0	0	0
Zonadhesin OS=Entamoeba histolytica HM-1:IMSS OX=294381 GN=EHI_178820 PE=4 SV=1	C4LUU6	EHI_178820	64 kDa	0	0	0	0	0	0
Eukaryotic translation initiation factor 5A OS=Entamoeba histolytica HM-1:IMSS OX=294381 GN=EHI_186480 PE=3 SV=1	C4LVN8	EHI_186480	17 kDa	0	0	0	0	0	0
Glutenin, low molecular weight subunit OS=Entamoeba histolytica HM-1:IMSS OX=294381 GN=EHI_197520 PE=4 SV=1	C4LVG8 (+2)	EHI_197520	45 kDa	0	0	0	1.2447	0.71637	1.2791
Ribosome biogenesis protein, putative OS=Entamoeba histolytica HM-1:IMSS OX=294381 GN=EHI_175090 PE=3 SV=1	C4LZN4 (+2)	EHI_175090	34 kDa	0	0	0	1.2447	1.4327	1.2791
Secreted protein OS=Entamoeba histolytica HM-1:IMSS OX=294381 GN=EHI_110000 PE=4 SV=1	C4M3L8	EHI_110000	24 kDa	0	0	0	0.62236	0	0.63955
DNA double-strand break repair Rad50 ATPase OS=Entamoeba histolytica HM-1:IMSS OX=294381 GN=EHI_086030 PE=4 SV=1	C4M358 (+2)	EHI_086030	75 kDa	0	0	0	0	0	0
DEAD/DEAH box helicase, putative OS=Entamoeba histolytica HM-1:IMSS OX=294381 GN=EHI_036900 PE=4 SV=1	C4M9V7 (+2)	EHI_036900	48 kDa	0	0	0	0	0.71637	1.2791
Nucleosome assembly protein, putative OS=Entamoeba histolytica HM-1:IMSS OX=294381 GN=EHI_120340 PE=3 SV=1	C4M8H9 (+2)	EHI_120340	31 kDa	0	2.7624	5.987	0	0	0
Phosphoglycerate mutase (2,3-diphosphoglycerate-independent) OS=Entamoeba histolytica HM-1:IMSS OX=294381 GN=EHI_050940 PE=3 SV=1	C4LTW4 (+2)	EHI_050940	62 kDa	0	2.7624	2.9935	0.62236	0	0
Uncharacterized protein OS=Entamoeba histolytica HM-1:IMSS OX=294381 GN=EHI_067260 PE=4 SV=1	C4MA84 (+1)	EHI_067260	47 kDa	0	0	0	0	0.71637	0.63955
Uncharacterized protein OS=Entamoeba histolytica HM-1:IMSS OX=294381 GN=EHI_092230 PE=4 SV=1	C4LUY8 (+2)	EHI_092230	34 kDa	0	0	0	0.62236	0.71637	0
Glutamic acid-rich protein OS=Entamoeba histolytica HM-1:IMSS OX=294381 GN=EHI_183160 PE=4 SV=1	C4LV89 (+1)	EHI_183160	32 kDa	0	0	0	1.8671	0.71637	0
Saposin B-type domain-containing protein OS=Entamoeba histolytica HM-1:IMSS OX=294381 GN=EHI_146810 PE=4 SV=1	C4MB36 (+2)	EHI_146810	77 kDa	0	0	0	0	0	0
rRNA-processing protein efg1 OS=Entamoeba histolytica HM-1:IMSS OX=294381 GN=EHI_088060 PE=4 SV=1	B1N405 (+2)	EHI_088060	19 kDa	0	0	0	0	0	0
Transcription factor BTF3, putative OS=Entamoeba histolytica HM-1:IMSS OX=294381 GN=EHI_198870 PE=4 SV=1	C4LWT3 (+2)	EHI_198870	19 kDa	0	0	5.987	0	0	0
Uncharacterized protein OS=Entamoeba histolytica HM-1:IMSS OX=294381 GN=EHI_075200 PE=4 SV=1	B1N4P2 (+2)	EHI_075200	28 kDa	0	0	0	0	0.71637	0
60S acidic ribosomal protein P2, putative OS=Entamoeba histolytica HM-1:IMSS OX=294381 GN=EHI_138770 PE=3 SV=1	C4M4I3 (+2)	EHI_138770	11 kDa	0	0	0	0	0	0
TLDc domain-containing protein OS=Entamoeba histolytica HM-1:IMSS OX=294381 GN=EHI_110780 PE=4 SV=1	C4LUC5 (+2)	EHI_110780	51 kDa	0	0	0	0	0.71637	1.2791
Transmembrane protein OS=Entamoeba histolytica HM-1:IMSS OX=294381 GN=EHI_153160 PE=4 SV=1	C4LSA8 (+2)	EHI_153160	68 kDa	0	0	0	0.62236	1.4327	0
Receptor protein kinase, putative OS=Entamoeba histolytica HM-1:IMSS OX=294381 GN=EHI_037140 PE=4 SV=1	C4M7N9 (+2)	EHI_037140	129 kDa	0	0	0	0	0	1.2791
Spc7 domain-containing protein OS=Entamoeba histolytica HM-1:IMSS OX=294381 GN=EHI_023320 PE=4 SV=1	C4LUP3 (+2)	EHI_023320	120 kDa	0	0	0	0	0	0
AIG1-type G domain-containing protein OS=Entamoeba histolytica HM-1:IMSS OX=294381 GN=EHI_165770 PE=4 SV=1	C4MBF1 (+2)	EHI_165770	23 kDa	0	0	0	0	0	0
Uncharacterized protein OS=Entamoeba histolytica HM-1:IMSS OX=294381 GN=EHI_107090 PE=4 SV=1	C4M150 (+2)	EHI_107090	29 kDa	0	0	0	0.62236	0.71637	0.63955
LisH domain-containing protein OS=Entamoeba histolytica HM-1:IMSS OX=294381 GN=EHI_152870 PE=4 SV=1	B1N2G1 (+2)	EHI_152870	32 kDa	0	0	0	0	0.71637	0
VWFA domain-containing protein OS=Entamoeba histolytica HM-1:IMSS OX=294381 GN=EHI_096790 PE=4 SV=1	C4LWI9 (+2)	EHI_096790	29 kDa	0	0	0	0	0	0
Coiled-coil domain-containing protein OS=Entamoeba histolytica HM-1:IMSS OX=294381 GN=EHI_104730 PE=4 SV=1	C4LZ81 (+2)	EHI_104730	66 kDa	0	0	0	0	0	0
Molybdopterin cofactor sulfurase, putative OS=Entamoeba histolytica HM-1:IMSS OX=294381 GN=EHI_027700 PE=4 SV=1	C4M1V6 (+2)	EHI_027700	53 kDa	0	0	0	0	0	0
Pept_C1 domain-containing protein OS=Entamoeba histolytica HM-1:IMSS OX=294381 GN=EHI_010340 PE=4 SV=1	C4LYT1	EHI_010340	64 kDa	0	0	0	0	1.4327	0
Uncharacterized protein OS=Entamoeba histolytica HM-1:IMSS OX=294381 GN=EHI_087870 PE=4 SV=1	C4LXW6 (+2)	EHI_087870	42 kDa	0	0	0	0	0	0.63955
F-BAR domain-containing protein OS=Entamoeba histolytica HM-1:IMSS OX=294381 GN=EHI_105210 PE=4 SV=1	C4M126 (+2)	EHI_105210	38 kDa	0	0	5.987	0	0	0
H/ACA ribonucleoprotein complex subunit OS=Entamoeba histolytica HM-1:IMSS OX=294381 GN=EHI_194040 PE=3 SV=1	C4LZT0	EHI_194040	19 kDa	0	0	0	0	0.71637	0
HMG box domain-containing protein OS=Entamoeba histolytica HM-1:IMSS OX=294381 GN=EHI_016350 PE=4 SV=1	C4M3V7 (+2)	EHI_016350	38 kDa	0	2.7624	5.987	0	0	0
HEAT repeat domain containing protein OS=Entamoeba histolytica HM-1:IMSS OX=294381 GN=EHI_118620 PE=4 SV=1	C4LYL2 (+2)	EHI_118620	181 kDa	0	0	0	0	0	0
SNF7 family protein OS=Entamoeba histolytica HM-1:IMSS OX=294381 GN=EHI_114790 PE=4 SV=1	C4M7T5 (+2)	EHI_114790	24 kDa	0	0	0	0	0	0
Dipeptidyl-peptidase, putative OS=Entamoeba histolytica HM-1:IMSS OX=294381 GN=EHI_136440 PE=4 SV=1	A0A8U0WPM9 (+2)	EHI_136440	77 kDa	0	0	0	0	0.71637	0.63955
Transmembrane protein OS=Entamoeba histolytica HM-1:IMSS OX=294381 GN=EHI_168290 PE=4 SV=1	C4M4R5 (+2)	EHI_168290	19 kDa	0	0	0	0	0	0
FACT complex subunit SSRP1 OS=Entamoeba histolytica HM-1:IMSS OX=294381 GN=EHI_082500 PE=3 SV=1	C4M6A1 (+2)	EHI_082500	44 kDa	0	0	0	0	0	0
Uncharacterized protein OS=Entamoeba histolytica HM-1:IMSS-B OX=885319 GN=EHI8A_178480 PE=4 SV=1	M3U1L7 (+1)	EHI8A_178480	73 kDa	0	0	0	0	0.71637	0
RRM domain-containing protein OS=Entamoeba histolytica HM-1:IMSS OX=294381 GN=EHI_167680 PE=4 SV=1	C4M800 (+2)	EHI_167680	22 kDa	0	0	0	0.62236	0	0
Trichohyalin-like OS=Entamoeba histolytica HM-1:IMSS OX=294381 GN=EHI_002190 PE=4 SV=1	C4M821 (+1)	EHI_002190	69 kDa	0	0	0	0	0	0.63955
tRNA splicing endonuclease, putative OS=Entamoeba histolytica HM-1:IMSS OX=294381 GN=EHI_111220 PE=4 SV=1	C4M5H1 (+2)	EHI_111220	131 kDa	0	0	0	0.62236	1.4327	0.63955
Aurora kinase OS=Entamoeba histolytica HM-1:IMSS OX=294381 GN=EHI_177010 PE=3 SV=1	C4LY26	EHI_177010	59 kDa	0	0	0	0	0	0
Replication factor A protein 1, putative OS=Entamoeba histolytica HM-1:IMSS OX=294381 GN=EHI_062980 PE=3 SV=1	C4M8G6 (+2)	EHI_062980	67 kDa	0	0	0	1.8671	0	0
Uncharacterized protein OS=Entamoeba histolytica HM-1:IMSS OX=294381 GN=EHI_054670 PE=4 SV=1	C4M2I6 (+2)	EHI_054670	22 kDa	0	0	0	0	0	0
Alpha-amylase family protein OS=Entamoeba histolytica HM-1:IMSS OX=294381 GN=EHI_023360 PE=4 SV=1	C4LUP7 (+2)	EHI_023360	57 kDa	0	0	0	0	0.71637	0
19S cap proteasome S2 subunit OS=Entamoeba histolytica HM-1:IMSS OX=294381 GN=EHI_198010 PE=3 SV=1	C4MB71 (+2)	EHI_198010	92 kDa	0	0	0	0	0	0
Uncharacterized protein OS=Entamoeba histolytica HM-1:IMSS OX=294381 GN=EHI_155310 PE=4 SV=1	C4LW84	EHI_155310	24 kDa	0	0	0	0	0	0
Uncharacterized protein OS=Entamoeba histolytica HM-1:IMSS OX=294381 GN=EHI_152510 PE=4 SV=1	C4LST8 (+2)	EHI_152510	27 kDa	0	0	0	0.62236	0.71637	0.63955
Uncharacterized protein OS=Entamoeba histolytica HM-1:IMSS OX=294381 GN=EHI_019630 PE=4 SV=1	C4MA47 (+2)	EHI_019630	23 kDa	0	0	0	0	0	0.63955
LIM zinc finger domain containing protein OS=Entamoeba histolytica HM-1:IMSS OX=294381 GN=EHI_001070 PE=4 SV=1	C4M1I7 (+2)	EHI_001070	44 kDa	0	0	0	0	0	0.63955
Proliferating cell nuclear antigen OS=Entamoeba histolytica HM-1:IMSS OX=294381 GN=EHI_128450 PE=1 SV=1	C4M9R9 (+2)	EHI_128450	29 kDa	0	0	0	1.2447	0	0
Heat shock protein 70, putative OS=Entamoeba histolytica HM-1:IMSS OX=294381 GN=EHI_198320 PE=3 SV=1	C4MA95	EHI_198320	63 kDa	0	0	0	0	0	0
VHS domain-containing protein OS=Entamoeba histolytica HM-1:IMSS OX=294381 GN=EHI_188100 PE=4 SV=1	C4M184 (+1)	EHI_188100	45 kDa	0	0	0	0	0	0
HMG box protein OS=Entamoeba histolytica HM-1:IMSS OX=294381 GN=EHI_179340 PE=4 SV=1	C4M9X4 (+2)	EHI_179340	45 kDa	0	0	0	0.62236	1.4327	0
Transcription initiation factor SPT5, putative OS=Entamoeba histolytica HM-1:IMSS OX=294381 GN=EHI_187280 PE=3 SV=1	C4LVU5 (+2)	EHI_187280	89 kDa	0	0	0	0	0	0
Uncharacterized protein OS=Entamoeba histolytica HM-1:IMSS OX=294381 GN=EHI_155400 PE=4 SV=1	C4LW91 (+2)	EHI_155400	25 kDa	0	0	0	0	0	1.2791
Copine, putative OS=Entamoeba histolytica HM-1:IMSS OX=294381 GN=EHI_163260 PE=4 SV=1	C4MBJ7 (+2)	EHI_163260	29 kDa	0	0	0	1.2447	0.71637	0.63955
DUF1394 domain-containing protein OS=Entamoeba histolytica HM-1:IMSS OX=294381 GN=EHI_131000 PE=3 SV=1	C4LXG8 (+2)	EHI_131000	34 kDa	0	0	0	0	0	0
DNA-directed RNA polymerase subunit N, putative OS=Entamoeba histolytica HM-1:IMSS OX=294381 GN=EHI_122780 PE=3 SV=1	C4M5M4 (+2)	EHI_122780	8 kDa	0	0	0	0	0	0
RhoGAP domain containing protein OS=Entamoeba histolytica HM-1:IMSS OX=294381 GN=EHI_182930 PE=4 SV=1	C4LV70 (+2)	EHI_182930	108 kDa	0	0	0	0.62236	0	1.9187
Proteasome subunit alpha type OS=Entamoeba histolytica HM-1:IMSS OX=294381 GN=EHI_004760 PE=3 SV=1	C4LUL4	EHI_004760	27 kDa	0	0	0	0	0	0
Phospholipid-transporting ATPase OS=Entamoeba histolytica HM-1:IMSS OX=294381 GN=EHI_009460 PE=3 SV=1	C4LZ23 (+1)	EHI_009460	129 kDa	0	0	0	0	0	0.63955
CUB_2 domain-containing protein OS=Entamoeba histolytica HM-1:IMSS OX=294381 GN=EHI_107300 PE=4 SV=1	C4M171 (+2)	EHI_107300	34 kDa	0	0	0	0	0.71637	0.63955
Lipase_3 domain-containing protein OS=Entamoeba histolytica HM-1:IMSS OX=294381 GN=EHI_077750 PE=4 SV=1	C4MAW4	EHI_077750	94 kDa	0	0	0	0.62236	0.71637	0
V-type proton ATPase subunit C OS=Entamoeba histolytica HM-1:IMSS-B OX=885319 GN=EHI8A_095620 PE=3 SV=1	M3TNT5	EHI8A_095620	74 kDa	0	0	0	0	0	0
WD domain containing protein OS=Entamoeba histolytica HM-1:IMSS OX=294381 GN=EHI_170100 PE=4 SV=1	C4M1D2 (+2)	EHI_170100	55 kDa	0	0	0	0	0	0
Kinesin, putative OS=Entamoeba histolytica HM-1:IMSS OX=294381 GN=EHI_119530 PE=3 SV=1	C4M7Y1	EHI_119530	64 kDa	0	0	0	0	0	0.63955
LIM zinc finger domain containing protein OS=Entamoeba histolytica HM-1:IMSS OX=294381 GN=EHI_111790 PE=4 SV=1	C4M577 (+2)	EHI_111790	19 kDa	0	0	0	0	0.71637	0.63955
HABP4_PAI-RBP1 domain-containing protein OS=Entamoeba histolytica HM-1:IMSS OX=294381 GN=EHI_017690 PE=4 SV=1	C4M3F2	EHI_017690	42 kDa	0	2.7624	2.9935	0	0	0
DNA double-strand break repair Rad50 ATPase OS=Entamoeba histolytica HM-1:IMSS OX=294381 GN=EHI_001130 PE=4 SV=1	C4M1J3 (+2)	EHI_001130	59 kDa	0	0	0	0.62236	0.71637	0.63955
Tetratricopeptide repeat protein OS=Entamoeba histolytica HM-1:IMSS OX=294381 GN=EHI_010040 PE=3 SV=1	C4M0R8 (+2)	EHI_010040	31 kDa	0	0	0	0	0	0
AP-1 complex subunit mu-2, putative OS=Entamoeba histolytica HM-1:IMSS OX=294381 GN=EHI_124460 PE=4 SV=1	A0A8U0WP62	EHI_124460	50 kDa	0	0	0	0	0	0
Proteasome alpha subunit, putative OS=Entamoeba histolytica HM-1:IMSS OX=294381 GN=EHI_086080 PE=3 SV=1	C4M363 (+2)	EHI_086080	28 kDa	0	0	0	0	0	0
Uncharacterized protein OS=Entamoeba histolytica HM-1:IMSS OX=294381 GN=EHI_097920 PE=4 SV=1	B1N3N5 (+2)	EHI_097920	21 kDa	0	0	0	0.62236	1.4327	0.63955
Cell division cycle protein 48, putative OS=Entamoeba histolytica HM-1:IMSS OX=294381 GN=EHI_045120 PE=4 SV=1	C4LTC5 (+2)	EHI_045120	88 kDa	0	0	0	0.62236	0	0
Proteasome endopeptidase complex OS=Entamoeba histolytica HM-1:IMSS OX=294381 GN=EHI_148040 PE=4 SV=1	C4LSX4 (+2)	EHI_148040	29 kDa	0	0	0	0	0	0
Lysine--tRNA ligase OS=Entamoeba histolytica HM-1:IMSS OX=294381 GN=EHI_047810 PE=1 SV=1	C4M7X2	EHI_047810	87 kDa	0	0	0	0.62236	0	0
Pescadillo homolog OS=Entamoeba histolytica HM-1:IMSS OX=294381 GN=EHI_009860 PE=3 SV=1	C4M0Q1 (+2)	EHI_009860	63 kDa	0	0	0	0.62236	0.71637	0
Glycoside hydrolase OS=Entamoeba histolytica HM-1:IMSS OX=294381 GN=EHI_044370 PE=4 SV=1	C4M784 (+2)	EHI_044370	78 kDa	0	0	0	0.62236	1.4327	0
Phospholipase B-like OS=Entamoeba histolytica HM-1:IMSS OX=294381 GN=EHI_118820 PE=3 SV=1	C4LYN0 (+2)	EHI_118820	64 kDa	0	0	0	0	0	0.63955
Coronin OS=Entamoeba histolytica HM-1:IMSS OX=294381 GN=EHI_082080 PE=3 SV=1	C4M5U0 (+2)	EHI_082080	102 kDa	0	0	0	0	0	0.63955
AP-1 complex subunit gamma OS=Entamoeba histolytica HM-1:IMSS-A OX=885318 GN=EHI7A_121960 PE=3 SV=1	N9TKJ6	EHI7A_121960	94 kDa	0	0	0	0.62236	0	1.2791
V-type ATPase, D subunit, putative OS=Entamoeba histolytica HM-1:IMSS OX=294381 GN=EHI_056390 PE=3 SV=1	C4M6Y9 (+2)	EHI_056390	29 kDa	0	0	0	0	0.71637	0
CRC domain-containing protein OS=Entamoeba histolytica HM-1:IMSS OX=294381 GN=EHI_153340 PE=4 SV=1	C4LSC5 (+2)	EHI_153340	20 kDa	0	0	0	0	0	0
Dynamin-1-like protein, putative OS=Entamoeba histolytica HM-1:IMSS OX=294381 GN=EHI_013180 PE=4 SV=1	C4LX84 (+2)	EHI_013180	77 kDa	0	0	0	0	0	1.2791
Protein kinase, putative OS=Entamoeba histolytica HM-1:IMSS OX=294381 GN=EHI_124860 PE=4 SV=1	C4M980 (+2)	EHI_124860	123 kDa	0	0	0	0	0	0
WD domain, G-beta repeat protein OS=Entamoeba histolytica HM-1:IMSS OX=294381 GN=EHI_000530 PE=4 SV=1	C4LZA4 (+2)	EHI_000530	69 kDa	0	0	0	0	0	0
SH3 domain-containing protein OS=Entamoeba histolytica HM-1:IMSS OX=294381 GN=EHI_148050 PE=4 SV=1	C4LSX5 (+2)	EHI_148050	44 kDa	0	0	0	0	0	0
60S acidic ribosomal protein P2, putative OS=Entamoeba histolytica HM-1:IMSS OX=294381 GN=EHI_179980 PE=3 SV=1	C4M649 (+2)	EHI_179980	11 kDa	0	0	0	0	0	0
SH3 domain protein OS=Entamoeba histolytica HM-1:IMSS OX=294381 GN=EHI_187770 PE=4 SV=1	C4M9I2 (+2)	EHI_187770	40 kDa	0	0	0	0	0	0.63955
rRNA processing protein, putative OS=Entamoeba histolytica HM-1:IMSS OX=294381 GN=EHI_055830 PE=3 SV=1	B1N2M7 (+2)	EHI_055830	25 kDa	0	0	0	0.62236	0.71637	0.63955
Rho family GTPase OS=Entamoeba histolytica HM-1:IMSS OX=294381 GN=EHI_180430 PE=3 SV=1	C4M292 (+2)	EHI_180430	22 kDa	0	0	0	0.62236	0	0.63955
Eukaryotic translation initiation factor 3 30 kDa subunit OS=Entamoeba histolytica HM-1:IMSS OX=294381 GN=EHI_178890 PE=4 SV=1	C4LUV3 (+2)	EHI_178890	25 kDa	0	0	0	0	0	0
EhCdc50 protein OS=Entamoeba histolytica HM-1:IMSS OX=294381 GN=EhCdc50 PE=3 SV=1	C4M6E4 (+2)	EhCdc50	36 kDa	0	0	0	0.62236	0.71637	1.2791
Protein kinase domain containing protein OS=Entamoeba histolytica HM-1:IMSS OX=294381 GN=EHI_087370 PE=4 SV=1	C4LXT0 (+2)	EHI_087370	30 kDa	0	0	0	0.62236	0	0
Uncharacterized protein OS=Entamoeba histolytica HM-1:IMSS OX=294381 GN=EHI_124820 PE=4 SV=1	C4M976 (+2)	EHI_124820	33 kDa	0	0	0	0.62236	0	0
Serine carboxypeptidase (S28) family protein OS=Entamoeba histolytica HM-1:IMSS OX=294381 GN=EHI_054530 PE=3 SV=1	C4M2I4 (+2)	EHI_054530	53 kDa	0	0	0	0.62236	0.71637	1.2791
RNA polymerase subunit Rpb5, putative OS=Entamoeba histolytica HM-1:IMSS OX=294381 GN=EHI_142090 PE=3 SV=1	C4LW54 (+2)	EHI_142090	24 kDa	0	0	0	0.62236	0.71637	0
Bromo domain-containing protein OS=Entamoeba histolytica HM-1:IMSS OX=294381 GN=EHI_138760 PE=4 SV=1	C4M4I2 (+2)	EHI_138760	76 kDa	0	0	0	0.62236	0	0.63955
WD domain containing protein OS=Entamoeba histolytica HM-1:IMSS OX=294381 GN=EHI_001960 PE=4 SV=1	C4M5L0 (+2)	EHI_001960	101 kDa	0	0	0	0.62236	0.71637	0
Tubulin alpha chain OS=Entamoeba histolytica HM-1:IMSS OX=294381 GN=EHI_010530 PE=3 SV=1	C4LYU0	EHI_010530	50 kDa	0	0	0	0	0	0
Trichohyalin OS=Entamoeba histolytica HM-1:IMSS OX=294381 GN=EHI_131480 PE=4 SV=1	C4M9Y3 (+1)	EHI_131480	90 kDa	0	0	0	0	0	0
Ras GEF OS=Entamoeba histolytica HM-1:IMSS OX=294381 GN=EHI_079250 PE=3 SV=1	C4M7R6 (+2)	EHI_079250	56 kDa	0	0	0	0	0.71637	0
Guanine nucleotide-binding protein subunit beta, putative OS=Entamoeba histolytica HM-1:IMSS OX=294381 GN=EHI_000240 PE=3 SV=1	C4LZ87 (+2)	EHI_000240	39 kDa	0	0	0	0	0	0
Heat shock protein 70 OS=Entamoeba histolytica HM-1:IMSS OX=294381 GN=EHI_035730 PE=4 SV=1	B1N2Z1 (+2)	EHI_035730	79 kDa	0	0	0	0	1.4327	0
Alpha-soluble NSF attachment protein, putative OS=Entamoeba histolytica HM-1:IMSS OX=294381 GN=EHI_064680 PE=3 SV=1	C4M0D4 (+2)	EHI_064680	32 kDa	0	0	0	0	0	0
26S protease regulatory subunit, putative OS=Entamoeba histolytica HM-1:IMSS OX=294381 GN=EHI_180350 PE=3 SV=1	C4M285 (+2)	EHI_180350	46 kDa	0	0	0	0.62236	0	0
Calcium-transporting ATPase OS=Entamoeba histolytica HM-1:IMSS OX=294381 GN=EHI_054830 PE=3 SV=1	C4M2K1	EHI_054830	121 kDa	0	0	0	0	0	0
WD domain containing protein OS=Entamoeba histolytica HM-1:IMSS OX=294381 GN=EHI_067830 PE=4 SV=1	C4LTX9 (+2)	EHI_067830	93 kDa	0	0	0	0	0	0
AP-2 complex protein, putative OS=Entamoeba histolytica HM-1:IMSS OX=294381 GN=EHI_045710 PE=4 SV=1	A0A8U0WPP0 (+2)	EHI_045710	109 kDa	0	0	0	0.62236	0	0.63955
Sec61 alpha subunit, putative OS=Entamoeba histolytica HM-1:IMSS OX=294381 GN=EHI_164500 PE=3 SV=1	C4M1T1	EHI_164500	37 kDa	0	0	0	0	0	0
Thioredoxin, putative OS=Entamoeba histolytica HM-1:IMSS OX=294381 GN=EHI_042900 PE=4 SV=1	C4M658 (+2)	EHI_042900	16 kDa	0	0	0	0	0.71637	0.63955
60S ribosomal protein L35, putative OS=Entamoeba histolytica HM-1:IMSS OX=294381 GN=EHI_042720 PE=3 SV=1	C4MB46 (+1)	EHI_042720	13 kDa	0	2.7624	0	0	0	0
Sulfite exporter TauE/SafE family protein OS=Entamoeba histolytica HM-1:IMSS OX=294381 GN=EHI_078310 PE=4 SV=1	C4M550 (+2)	EHI_078310	50 kDa	0	0	0	0.62236	0.71637	0.63955
Pore-forming peptide ameobapore B, putative OS=Entamoeba histolytica HM-1:IMSS OX=294381 GN=EHI_194540 PE=4 SV=1	B1N366 (+2)	EHI_194540	10 kDa	0	0	0	0.62236	1.4327	0
TLDc domain-containing protein OS=Entamoeba histolytica HM-1:IMSS OX=294381 GN=EHI_155720 PE=4 SV=1	C4LWC1 (+2)	EHI_155720	41 kDa	0	0	0	0	0	0.63955
Ras family GTPase OS=Entamoeba histolytica HM-1:IMSS OX=294381 GN=EHI_137700 PE=4 SV=1	A0A8U0WNZ9 (+2)	EHI_137700	23 kDa	0	0	0	0	0	0
Hsc70-interacting protein, putative OS=Entamoeba histolytica HM-1:IMSS OX=294381 GN=EHI_158050 PE=4 SV=1	C4M2C4 (+2)	EHI_158050	40 kDa	0	0	0	0	0	0
Translation initiation factor IF-2 OS=Entamoeba histolytica HM-1:IMSS OX=294381 GN=EHI_180410 PE=4 SV=1	C4M290 (+1)	EHI_180410	33 kDa	0	0	0	0	0	0
Arrestin_C domain-containing protein OS=Entamoeba histolytica HM-1:IMSS OX=294381 GN=EHI_167660 PE=4 SV=1	C4M7Z8 (+2)	EHI_167660	74 kDa	0	0	0	0	0	0
Secreted protein OS=Entamoeba histolytica HM-1:IMSS OX=294381 GN=EHI_120600 PE=4 SV=1	C4M8X1 (+1)	EHI_120600	34 kDa	0	0	0	0	0	0
Ribosome assembly factor mrt4 OS=Entamoeba histolytica HM-1:IMSS OX=294381 GN=EHI_159790 PE=3 SV=1	C4LX57	EHI_159790	26 kDa	0	0	0	0	1.4327	0
WD repeat protein 2, putative OS=Entamoeba histolytica HM-1:IMSS OX=294381 GN=EHI_142190 PE=4 SV=1	B1N2S4 (+1)	EHI_142190	65 kDa	0	0	0	0	0	0
Cullin, putative OS=Entamoeba histolytica HM-1:IMSS OX=294381 GN=EHI_148160 PE=3 SV=1	C4LSY6 (+2)	EHI_148160	82 kDa	0	0	0	0.62236	0	0
Thioredoxin, putative OS=Entamoeba histolytica HM-1:IMSS OX=294381 GN=EHI_026340 PE=3 SV=1	C4M5V0 (+2)	EHI_026340	14 kDa	0	0	0	0	0	0
Protein kinase domain-containing protein OS=Entamoeba histolytica HM-1:IMSS OX=294381 GN=EHI_070680 PE=4 SV=1	C4M5S0 (+2)	EHI_070680	56 kDa	0	0	0	1.2447	1.4327	0.63955
Uncharacterized protein OS=Entamoeba histolytica HM-1:IMSS OX=294381 GN=EHI_077530 PE=4 SV=1	C4M8N5 (+1)	EHI_077530	23 kDa	0	0	0	0.62236	0.71637	1.2791
Dolichyl-diphosphooligosaccharide--protein glycosyltransferase 48 kDa subunit OS=Entamoeba histolytica HM-1:IMSS OX=294381 GN=EHI_183010 PE=3 SV=1	C4LV77 (+2)	EHI_183010	43 kDa	0	0	0	0.62236	0.71637	0.63955
Skp1 protein, putative OS=Entamoeba histolytica HM-1:IMSS OX=294381 GN=EHI_118670 PE=3 SV=1	C4LYL7 (+2)	EHI_118670	19 kDa	0	0	0	0.62236	1.4327	1.2791
Polyadenylate-binding protein, putative OS=Entamoeba histolytica HM-1:IMSS OX=294381 GN=EHI_033250 PE=3 SV=1	C4M6Y2 (+2)	EHI_033250	59 kDa	0	2.7624	0	1.2447	0	0
Uncharacterized protein OS=Entamoeba histolytica HM-1:IMSS OX=294381 GN=EHI_098000 PE=4 SV=1	C4M497 (+2)	EHI_098000	32 kDa	0	0	0	0.62236	0.71637	0
EF-hand domain-containing protein OS=Entamoeba histolytica HM-1:IMSS OX=294381 GN=EHI_114440 PE=4 SV=1	B1N4B0 (+3)	EHI_114440	43 kDa	0	0	0	0	0	0.63955
TLDc domain-containing protein OS=Entamoeba histolytica HM-1:IMSS OX=294381 GN=EHI_024440 PE=4 SV=1	C4M0I6 (+2)	EHI_024440	29 kDa	0	0	0	0	0.71637	0.63955
Thioredoxin, putative OS=Entamoeba histolytica HM-1:IMSS OX=294381 GN=EHI_021560 PE=4 SV=1	C4M067 (+2)	EHI_021560	43 kDa	0	0	0	0	0	0
DnaJ family protein OS=Entamoeba histolytica HM-1:IMSS OX=294381 GN=EHI_079720 PE=3 SV=1	C4M2K3 (+2)	EHI_079720	46 kDa	0	0	0	0.62236	0	0
Coenzyme A transferase OS=Entamoeba histolytica HM-1:IMSS OX=294381 GN=EHI_124510 PE=4 SV=1	C4LZI7 (+2)	EHI_124510	23 kDa	0	0	0	0	0	0
Transmembrane protein OS=Entamoeba histolytica HM-1:IMSS OX=294381 GN=EHI_111800 PE=4 SV=1	C4M578 (+2)	EHI_111800	33 kDa	0	0	0	0	0.71637	0
Proteasome regulatory subunit, putative OS=Entamoeba histolytica HM-1:IMSS OX=294381 GN=EHI_030170 PE=3 SV=1	C4M451 (+2)	EHI_030170	36 kDa	0	0	0	0.62236	0	0
TLDc domain-containing protein OS=Entamoeba histolytica HM-1:IMSS OX=294381 GN=EHI_060440 PE=4 SV=1	B1N3Z9 (+2)	EHI_060440	31 kDa	0	0	0	1.8671	0.71637	0
Uncharacterized protein OS=Entamoeba histolytica HM-1:IMSS OX=294381 GN=EHI_080580 PE=4 SV=1	C4M9N7 (+2)	EHI_080580	13 kDa	0	0	0	0	0	0
Filopodin, putative OS=Entamoeba histolytica HM-1:IMSS-B OX=885319 GN=EHI8A_075480 PE=4 SV=1	M3S0M1 (+1)	EHI8A_075480	152 kDa	0	0	0	0.62236	0	0
Rab GTPase activating protein, putative OS=Entamoeba histolytica HM-1:IMSS OX=294381 GN=EHI_010690 PE=4 SV=1	C4LYV6 (+2)	EHI_010690	73 kDa	0	0	0	0	0	0
DEAD/DEAH box helicase, putative OS=Entamoeba histolytica HM-1:IMSS OX=294381 GN=EHI_119620 PE=3 SV=1	C4M7Y5 (+2)	EHI_119620	80 kDa	0	0	0	0	0	0
AIG1 family protein OS=Entamoeba histolytica HM-1:IMSS OX=294381 GN=EHI_144270 PE=4 SV=1	C4MB61	EHI_144270	33 kDa	0	0	0	0.62236	0	0.63955
Secreted protein OS=Entamoeba histolytica HM-1:IMSS OX=294381 GN=EHI_139010 PE=4 SV=1	C4M4J1 (+2)	EHI_139010	19 kDa	0	0	0	0	0	0
Rab family GTPase OS=Entamoeba histolytica HM-1:IMSS OX=294381 GN=EHI_042250 PE=4 SV=1	A0A8U0WPF2 (+2)	EHI_042250	22 kDa	0	0	0	0	0	0
MIT_C domain-containing protein OS=Entamoeba histolytica HM-1:IMSS OX=294381 GN=EHI_125600 PE=4 SV=1	C4LVU8 (+2)	EHI_125600	25 kDa	0	0	0	0	0.71637	0.63955
C2 domain-containing protein OS=Entamoeba histolytica HM-1:IMSS OX=294381 GN=EHI_163640 PE=4 SV=1	C4M3U4 (+1)	EHI_163640	49 kDa	0	0	0	0.62236	0.71637	0
RING-type domain-containing protein OS=Entamoeba histolytica HM-1:IMSS OX=294381 GN=EHI_108730 PE=4 SV=1	C4M837 (+2)	EHI_108730	78 kDa	0	0	0	0	0	0
Uncharacterized protein OS=Entamoeba histolytica HM-1:IMSS OX=294381 GN=EHI_021410 PE=4 SV=1	A0A8U0WPX7 (+2)	EHI_021410	26 kDa	0	0	0	0	0	0
C2 domain-containing protein OS=Entamoeba histolytica HM-1:IMSS OX=294381 GN=EHI_189170 PE=3 SV=1	C4M9K8 (+2)	EHI_189170	84 kDa	0	0	0	0.62236	0	0
Nucleoporin p58/p45 OS=Entamoeba histolytica HM-1:IMSS OX=294381 GN=EHI_006730 PE=4 SV=1	C4M0E6 (+2)	EHI_006730	42 kDa	0	0	0	0.62236	0	0.63955
Proteasome regulatory subunit, putative OS=Entamoeba histolytica HM-1:IMSS OX=294381 GN=EHI_182600 PE=3 SV=1	C4LV41 (+2)	EHI_182600	43 kDa	0	0	0	0	0	0
Uncharacterized protein OS=Entamoeba histolytica HM-1:IMSS OX=294381 GN=EHI_151550 PE=4 SV=1	C4LSJ6 (+1)	EHI_151550	11 kDa	0	0	0	0	0	0
Kinetochore protein NDC80 OS=Entamoeba histolytica HM-1:IMSS OX=294381 GN=EHI_125620 PE=3 SV=1	C4LVV0 (+2)	EHI_125620	67 kDa	0	0	0	0	0	0
Splicing factor3B subunit 2, putative OS=Entamoeba histolytica HM-1:IMSS OX=294381 GN=EHI_069550 PE=4 SV=1	C4LWP3 (+2)	EHI_069550	24 kDa	0	0	0	0	0	0
Phospholipase B-like OS=Entamoeba histolytica HM-1:IMSS OX=294381 GN=EHI_097630 PE=3 SV=1	C4M934 (+2)	EHI_097630	59 kDa	0	0	0	0	0.71637	0
PT-TG domain-containing protein OS=Entamoeba histolytica HM-1:IMSS OX=294381 GN=EHI_159670 PE=4 SV=1	C4LX47 (+2)	EHI_159670	46 kDa	0	0	0	0	0	0
60S ribosomal protein L37a, putative OS=Entamoeba histolytica HM-1:IMSS OX=294381 GN=EHI_008650 PE=3 SV=1	A0A175JXH6 (+3)	EHI_008650	10 kDa	0	0	2.9935	0	0	0
Purine nucleoside phosphorylase, putative OS=Entamoeba histolytica HM-1:IMSS OX=294381 GN=EHI_200080 PE=4 SV=1	C4M7M1 (+2)	EHI_200080	35 kDa	0	0	2.9935	0	0	0
60S ribosome subunit biogenesis protein NIP7 homolog OS=Entamoeba histolytica HM-1:IMSS OX=294381 GN=EHI_017890 PE=3 SV=1	B1N5A1 (+1)	EHI_017890	21 kDa	0	0	0	0	0	0
Golgi apparatus membrane protein TVP23 homolog OS=Entamoeba histolytica HM-1:IMSS OX=294381 GN=EHI_148020 PE=3 SV=1	C4LSX2 (+2)	EHI_148020	23 kDa	0	0	2.9935	0	0.71637	1.2791
Rab family GTPase OS=Entamoeba histolytica HM-1:IMSS-B OX=885319 GN=EHI8A_174230 PE=3 SV=1	M3UQE9	EHI8A_174230	21 kDa	0	0	0	0.62236	0.71637	0
NPL domain-containing protein OS=Entamoeba histolytica HM-1:IMSS OX=294381 GN=EHI_052040 PE=4 SV=1	C4M859 (+2)	EHI_052040	23 kDa	0	0	0	0	0	0
Uncharacterized protein OS=Entamoeba histolytica HM-1:IMSS OX=294381 GN=EHI_007490 PE=4 SV=1	C4LYC1 (+2)	EHI_007490	41 kDa	0	0	0	0.62236	0.71637	0.63955
Protein MNN4 OS=Entamoeba histolytica HM-1:IMSS OX=294381 GN=EHI_198680 PE=4 SV=1	C4LWR4 (+1)	EHI_198680	28 kDa	0	0	0	0	0	0.63955
Ricin B-type lectin domain-containing protein OS=Entamoeba histolytica HM-1:IMSS OX=294381 GN=EHI_107930 PE=4 SV=1	B1N4G5 (+2)	EHI_107930	22 kDa	0	0	0	0	0	0
RICIN domain-containing protein OS=Entamoeba histolytica HM-1:IMSS OX=294381 GN=EHI_138510 PE=4 SV=1	C4M3J3 (+2)	EHI_138510	32 kDa	0	0	0	0	0	0
Cortexillin II, putative OS=Entamoeba histolytica HM-1:IMSS-A OX=885318 GN=EHI7A_184960 PE=4 SV=1	N9V0H2	EHI7A_184960	62 kDa	0	0	0	0	0	0
Uncharacterized protein OS=Entamoeba histolytica HM-1:IMSS OX=294381 GN=EHI_053850 PE=4 SV=1	C4MBD9 (+2)	EHI_053850	76 kDa	0	0	0	0	0	0
Dolichyl-diphosphooligosaccharide--protein glycosyltransferase 48 kDa subunit OS=Entamoeba histolytica HM-1:IMSS OX=294381 GN=EHI_069430 PE=3 SV=1	C4LWN1 (+3)	EHI_069430	48 kDa	0	0	0	0	0	0
40S ribosomal protein S12 OS=Entamoeba histolytica HM-1:IMSS OX=294381 GN=EHI_186720 PE=3 SV=1	C4LVN9 (+1)	EHI_186720	15 kDa	0	0	0	0	0	0
Histone H3, putative OS=Entamoeba histolytica HM-1:IMSS OX=294381 GN=EHI_178480 PE=3 SV=1	C4LUR4 (+2)	EHI_178480	24 kDa	0	0	0	0	0	0
DnaJ family protein OS=Entamoeba histolytica HM-1:IMSS OX=294381 GN=EHI_151260 PE=3 SV=1	C4LSG9 (+2)	EHI_151260	45 kDa	0	0	0	0	0	0
Uncharacterized protein OS=Entamoeba histolytica HM-1:IMSS OX=294381 GN=EHI_011830 PE=4 SV=1	C4LTH9 (+1)	EHI_011830	19 kDa	0	0	0	0	0	0.63955
V-type proton ATPase proteolipid subunit OS=Entamoeba histolytica HM-1:IMSS OX=294381 GN=EHI_059840 PE=3 SV=1	C4M343 (+1)	EHI_059840	18 kDa	0	0	0	0.62236	1.4327	1.2791
Nuclear transport receptor, putative OS=Entamoeba histolytica HM-1:IMSS OX=294381 GN=EHI_166900 PE=4 SV=1	C4LY94 (+2)	EHI_166900	106 kDa	0	0	0	0	0	0
Ribosome assembly protein 3 OS=Entamoeba histolytica HM-1:IMSS OX=294381 GN=EHI_194360 PE=3 SV=1	B1N365 (+2)	EHI_194360	32 kDa	0	0	0	0	0	0
Uncharacterized protein OS=Entamoeba histolytica HM-1:IMSS OX=294381 GN=EHI_079850 PE=4 SV=1	C4M2K6 (+1)	EHI_079850	23 kDa	0	0	0	0	0	0
Ribosome biogenesis protein NSA2 homolog OS=Entamoeba histolytica HM-1:IMSS OX=294381 GN=EHI_099760 PE=3 SV=1	C4M6H0 (+2)	EHI_099760	30 kDa	0	0	0	0	0	0
Uncharacterized protein OS=Entamoeba histolytica HM-1:IMSS OX=294381 GN=EHI_194980 PE=4 SV=1	C4M403 (+2)	EHI_194980	53 kDa	0	0	0	0	0	0
Nucleosome assembly protein, putative OS=Entamoeba histolytica HM-1:IMSS OX=294381 GN=EHI_084970 PE=3 SV=1	C4M1K7 (+2)	EHI_084970	37 kDa	0	0	0	0.62236	0	0
WD repeat protein OS=Entamoeba histolytica HM-1:IMSS OX=294381 GN=EHI_117620 PE=4 SV=1	C4M677 (+2)	EHI_117620	31 kDa	0	0	0	0	0	0
Helicase, putative OS=Entamoeba histolytica HM-1:IMSS OX=294381 GN=EHI_096230 PE=4 SV=1	C4LWD6 (+1)	EHI_096230	77 kDa	0	0	0	0	0	0
Uncharacterized protein OS=Entamoeba histolytica HM-1:IMSS OX=294381 GN=EHI_038590 PE=4 SV=1	A0A8U0WP28 (+2)	EHI_038590	22 kDa	0	0	0	0	0	0
Xaa-Pro dipeptidase, putative OS=Entamoeba histolytica HM-1:IMSS OX=294381 GN=EHI_010070 PE=4 SV=1	C4M0S1 (+2)	EHI_010070	54 kDa	0	0	2.9935	0	0	0
NPL domain-containing protein OS=Entamoeba histolytica HM-1:IMSS OX=294381 GN=EHI_112830 PE=4 SV=1	C4M9M2 (+2)	EHI_112830	23 kDa	0	0	0	0	0	0
Cysteine proteinase 1, putative OS=Entamoeba histolytica HM-1:IMSS OX=294381 GN=EHI_074180 PE=3 SV=1	C4M307	EHI_074180	35 kDa	0	0	0	0	0	0
Transmembrane protein OS=Entamoeba histolytica HM-1:IMSS OX=294381 GN=EHI_139040 PE=4 SV=1	C4M4J4 (+2)	EHI_139040	56 kDa	0	0	0	1.2447	0.71637	0.63955
Bromodomain protein, putative OS=Entamoeba histolytica HM-1:IMSS OX=294381 GN=EHI_200210 PE=4 SV=1	C4M7M6 (+2)	EHI_200210	64 kDa	0	0	0	0.62236	0	0.63955
RING-type domain-containing protein OS=Entamoeba histolytica HM-1:IMSS OX=294381 GN=EHI_193090 PE=4 SV=1	C4M9B1 (+2)	EHI_193090	65 kDa	0	0	0	0.62236	0	0
KIN17-like protein OS=Entamoeba histolytica HM-1:IMSS OX=294381 GN=EHI_148150 PE=4 SV=1	C4LSY5 (+2)	EHI_148150	34 kDa	0	0	0	0.62236	0	0
Clathrin adaptor complex small chain, putative OS=Entamoeba histolytica HM-1:IMSS OX=294381 GN=EHI_009940 PE=4 SV=1	A0A8U0WPX6	EHI_009940	17 kDa	0	0	0	0	0.71637	0
V-type proton ATPase subunit H OS=Entamoeba histolytica HM-1:IMSS OX=294381 GN=EHI_068750 PE=3 SV=1	C4LU65 (+2)	EHI_068750	52 kDa	0	0	0	0	0.71637	0
VWFA domain-containing protein OS=Entamoeba histolytica HM-1:IMSS OX=294381 GN=EHI_001100 PE=4 SV=1	C4M1J0 (+1)	EHI_001100	55 kDa	0	0	0	0	0.71637	0.63955
Actobindin, putative OS=Entamoeba histolytica HM-1:IMSS OX=294381 GN=EHI_039020 PE=4 SV=1	C4LZS3 (+2)	EHI_039020	9 kDa	0	0	2.9935	0	0	0
S-phase kinase-associated protein 1A, putative OS=Entamoeba histolytica HM-1:IMSS OX=294381 GN=EHI_134960 PE=3 SV=1	C4M0Y3 (+2)	EHI_134960	18 kDa	0	0	0	0	0	0
WD domain containing protein OS=Entamoeba histolytica HM-1:IMSS OX=294381 GN=EHI_052160 PE=4 SV=1	C4M856 (+2)	EHI_052160	59 kDa	0	0	0	0.62236	0	0.63955
WD domain containing protein OS=Entamoeba histolytica HM-1:IMSS OX=294381 GN=EHI_035590 PE=4 SV=1	C4LXY9 (+2)	EHI_035590	74 kDa	0	0	0	1.2447	0	0
Uncharacterized protein OS=Entamoeba histolytica HM-1:IMSS OX=294381 GN=EHI_116720 PE=4 SV=1	A0A8U0WP44 (+2)	EHI_116720	24 kDa	0	0	0	0	0	0
Uncharacterized protein OS=Entamoeba histolytica HM-1:IMSS OX=294381 GN=EHI_137920 PE=4 SV=1	C4LZF3 (+1)	EHI_137920	56 kDa	0	0	0	0	0	0
Calponin-homology (CH) domain-containing protein OS=Entamoeba histolytica HM-1:IMSS OX=294381 GN=EHI_007640 PE=4 SV=1	C4LYC5 (+1)	EHI_007640	140 kDa	0	0	0	0.62236	0.71637	0
Surface antigen ariel1, putative OS=Entamoeba histolytica HM-1:IMSS OX=294381 GN=EHI_080200 PE=4 SV=1	B1N4C2 (+4)	EHI_080200	25 kDa	0	0	0	0	0	0.63955
Cysteine proteinase, putative OS=Entamoeba histolytica HM-1:IMSS OX=294381 GN=EHI_168240 PE=4 SV=1	A0A8U0WQ39 (+2)	EHI_168240	35 kDa	0	0	0	0	0.71637	0
Ras family GTPase OS=Entamoeba histolytica HM-1:IMSS OX=294381 GN=EHI_196530 PE=3 SV=1	C4MAI1 (+2)	EHI_196530	24 kDa	0	0	0	0	0	0.63955
Helicase, putative OS=Entamoeba histolytica HM-1:IMSS OX=294381 GN=EHI_151600 PE=4 SV=1	C4LSK1 (+2)	EHI_151600	47 kDa	0	0	2.9935	0	0	0
Phospholipase B-like OS=Entamoeba histolytica HM-1:IMSS OX=294381 GN=EHI_114320 PE=3 SV=1	C4M8M7 (+2)	EHI_114320	63 kDa	0	0	0	0	0	0
Scaffoldin OS=Entamoeba histolytica HM-1:IMSS OX=294381 GN=EHI_011560 PE=4 SV=1	C4M9J2	EHI_011560	59 kDa	0	0	0	0	0	0
SPK domain-containing protein OS=Entamoeba histolytica HM-1:IMSS OX=294381 GN=EHI_110440 PE=4 SV=1	C4LU96 (+2)	EHI_110440	39 kDa	0	0	0	0	0	0
Ribosome biogenesis protein WDR12 homolog OS=Entamoeba histolytica HM-1:IMSS OX=294381 GN=EHI_118030 PE=3 SV=1	C4LYY7 (+2)	EHI_118030	45 kDa	0	0	0	0.62236	0	0
Nucleolar protein 16 OS=Entamoeba histolytica HM-1:IMSS OX=294381 GN=EHI_098080 PE=3 SV=1	C4M4A4 (+1)	EHI_098080	24 kDa	0	0	0	0.62236	0	0
U3 small nucleolar RNA-associated protein 6 OS=Entamoeba histolytica HM-1:IMSS OX=294381 GN=EHI_012960 PE=3 SV=1	C4LX68 (+1)	EHI_012960	60 kDa	0	0	0	0	0	0
DEAD/DEAH box helicase, putative OS=Entamoeba histolytica HM-1:IMSS OX=294381 GN=EHI_052790 PE=4 SV=1	C4M3R8 (+2)	EHI_052790	57 kDa	0	0	0	0	0	0
WD domain containing protein OS=Entamoeba histolytica HM-1:IMSS OX=294381 GN=EHI_140750 PE=4 SV=1	C4M3P7 (+2)	EHI_140750	87 kDa	0	0	0	0	0	0
RNA cytidine acetyltransferase OS=Entamoeba histolytica HM-1:IMSS OX=294381 GN=EHI_033750 PE=3 SV=1	C4M438 (+2)	EHI_033750	111 kDa	0	0	0	0	0	0
40S ribosomal protein S11, putative OS=Entamoeba histolytica HM-1:IMSS OX=294381 GN=EHI_124850 PE=3 SV=1	C4M979 (+1)	EHI_124850	18 kDa	0	0	0	0	0	0
Zinc finger, CCHC-type domain-containing protein OS=Entamoeba histolytica HM-1:IMSS OX=294381 GN=EHI_193690 PE=4 SV=1	B1N4Z8	EHI_193690	41 kDa	0	0	0	0	0	0
Asparaginyl-tRNA synthetase, putative OS=Entamoeba histolytica HM-1:IMSS OX=294381 GN=EHI_126920 PE=1 SV=1	C4LWW8 (+2)	EHI_126920	52 kDa	0	0	0	0.62236	0	0
26S proteasome non-ATPase regulatory subunit 14, putative OS=Entamoeba histolytica HM-1:IMSS OX=294381 GN=EHI_164750 PE=4 SV=1	C4M1W8 (+2)	EHI_164750	33 kDa	0	0	0	0	0	0
ELM2 domain-containing protein OS=Entamoeba histolytica HM-1:IMSS OX=294381 GN=EHI_136390 PE=4 SV=1	C4M2A8 (+2)	EHI_136390	15 kDa	0	0	0	0	0	0
Rho family GTPase OS=Entamoeba histolytica HM-1:IMSS OX=294381 GN=EHI_190440 PE=3 SV=1	C4M9T7 (+2)	EHI_190440	22 kDa	0	0	0	0.62236	0	0
High mobility group (HMG) box domain containing protein OS=Entamoeba histolytica HM-1:IMSS OX=294381 GN=EHI_086110 PE=4 SV=1	C4M366 (+2)	EHI_086110	16 kDa	0	0	0	0	0	0
Rab family GTPase OS=Entamoeba histolytica HM-1:IMSS OX=294381 GN=EHI_117890 PE=3 SV=1	C4LYX3 (+2)	EHI_117890	23 kDa	0	0	0	0.62236	0	0
AIG1 family protein OS=Entamoeba histolytica HM-1:IMSS OX=294381 GN=EHI_022500 PE=4 SV=1	C4MBK3	EHI_022500	35 kDa	0	0	0	0	0	0
U3 small nucleolar RNA-associated protein OS=Entamoeba histolytica HM-1:IMSS OX=294381 GN=EHI_138370 PE=4 SV=1	C4M3H9	EHI_138370	79 kDa	0	0	0	0	0	0
SHSP domain-containing protein OS=Entamoeba histolytica HM-1:IMSS OX=294381 GN=EHI_158290 PE=4 SV=1	C4M2E8 (+2)	EHI_158290	23 kDa	0	0	0	0	0	0
Uncharacterized protein OS=Entamoeba histolytica HM-1:IMSS OX=294381 GN=EHI_040370 PE=4 SV=1	C4M2G6 (+2)	EHI_040370	15 kDa	0	0	0	0	0	0
Pre-rRNA-processing protein IPI3 OS=Entamoeba histolytica HM-1:IMSS OX=294381 GN=EHI_137840 PE=4 SV=1	C4LZE5 (+2)	EHI_137840	46 kDa	0	0	0	0	0	0
LMBR1-like membrane protein OS=Entamoeba histolytica HM-1:IMSS OX=294381 GN=EHI_015360 PE=4 SV=1	C4M0X4	EHI_015360	55 kDa	0	0	0	0	0	0
DNA-directed RNA polymerases I and III subunit RPAC1, putative OS=Entamoeba histolytica HM-1:IMSS-A OX=885318 GN=EHI7A_181920 PE=3 SV=1	N9UYV1	EHI7A_181920	33 kDa	0	0	0	0	0	0
Cnd1 domain-containing protein (Fragment) OS=Entamoeba histolytica HM-1:IMSS-B OX=885319 GN=EHI8A_089370 PE=4 SV=1	M3S2H1 (+1)	EHI8A_089370	133 kDa	0	0	0	0	0	0
WD domain containing protein OS=Entamoeba histolytica HM-1:IMSS OX=294381 GN=EHI_151370 PE=4 SV=1	C4LSH9 (+2)	EHI_151370	98 kDa	0	0	0	0	0	0
DEAD/DEAH box helicase, putative OS=Entamoeba histolytica HM-1:IMSS OX=294381 GN=EHI_111040 PE=3 SV=1	C4M5I5	EHI_111040	49 kDa	0	0	0	0	0	0
40S ribosomal protein S28, putative OS=Entamoeba histolytica HM-1:IMSS OX=294381 GN=EHI_038860 PE=3 SV=1	C4LZQ8 (+5)	EHI_038860	8 kDa	0	0	2.9935	0.62236	0	0
Importin alpha, putative OS=Entamoeba histolytica HM-1:IMSS OX=294381 GN=EHI_105090 PE=4 SV=1	C4M114 (+2)	EHI_105090	55 kDa	0	0	0	0.62236	0.71637	0.63955
Nucleosome assembly protein, putative OS=Entamoeba histolytica HM-1:IMSS OX=294381 GN=EHI_139460 PE=3 SV=1	C4M6X1 (+2)	EHI_139460	40 kDa	0	0	0	0	0	0
Coatomer beta subunit, putative OS=Entamoeba histolytica HM-1:IMSS OX=294381 GN=EHI_088220 PE=4 SV=1	A0A8U0WPB4 (+1)	EHI_088220	104 kDa	0	0	0	0	0	0
Transcriptional coactivator, putative OS=Entamoeba histolytica HM-1:IMSS OX=294381 GN=EHI_192520 PE=3 SV=1	C4M1H2 (+2)	EHI_192520	18 kDa	0	0	0	0	0	0
Zf-AD domain-containing protein OS=Entamoeba histolytica HM-1:IMSS OX=294381 GN=EHI_085010 PE=4 SV=1	C4M1L1 (+2)	EHI_085010	28 kDa	0	0	0	0.62236	0	0
Uncharacterized protein OS=Entamoeba histolytica HM-1:IMSS OX=294381 GN=EHI_007930 PE=4 SV=1	C4LYD0 (+2)	EHI_007930	45 kDa	0	0	0	0	0.71637	0
Serine/threonine-protein phosphatase OS=Entamoeba histolytica HM-1:IMSS OX=294381 GN=EHI_031240 PE=3 SV=1	C4M4K6 (+2)	EHI_031240	35 kDa	0	0	0	0	0	0
LIM zinc finger domain containing protein OS=Entamoeba histolytica HM-1:IMSS OX=294381 GN=EHI_110280 PE=4 SV=1	C4LU80	EHI_110280	33 kDa	0	0	0	0	1.4327	1.2791
WWE domain-containing protein OS=Entamoeba histolytica HM-1:IMSS OX=294381 GN=EHI_069610 PE=4 SV=1	C4LWP8 (+2)	EHI_069610	34 kDa	0	0	0	0.62236	0	0
DUF148 domain-containing protein OS=Entamoeba histolytica HM-1:IMSS OX=294381 GN=EHI_114140 PE=4 SV=1	C4M421	EHI_114140	18 kDa	0	0	0	0	0	0
Sas10 domain-containing protein OS=Entamoeba histolytica HM-1:IMSS OX=294381 GN=EHI_099750 PE=3 SV=1	C4M6G9 (+1)	EHI_099750	55 kDa	0	0	0	0	0	0
Glycerophosphoryl diester phosphodiesterase, putative OS=Entamoeba histolytica HM-1:IMSS OX=294381 GN=EHI_113970 PE=4 SV=1	C4M8W3 (+2)	EHI_113970	44 kDa	0	0	0	0	0	0
Uncharacterized protein OS=Entamoeba histolytica HM-1:IMSS OX=294381 GN=EHI_082240 PE=4 SV=1	C4M5U6 (+2)	EHI_082240	28 kDa	0	0	0	0	0	0
Protein kinase, putative OS=Entamoeba histolytica HM-1:IMSS OX=294381 GN=EHI_140330 PE=4 SV=1	C4M481	EHI_140330	85 kDa	0	0	0	0.62236	0.71637	0
C2 domain containing protein OS=Entamoeba histolytica HM-1:IMSS OX=294381 GN=EHI_148380 PE=4 SV=1	C4LT08 (+2)	EHI_148380	51 kDa	0	0	0	0	0.71637	0
Beta-hexosaminidase OS=Entamoeba histolytica HM-1:IMSS OX=294381 GN=EHI_007330 PE=3 SV=1	C4M7C8 (+2)	EHI_007330	64 kDa	0	0	0	0	0	0
Rho family GTPase OS=Entamoeba histolytica HM-1:IMSS OX=294381 GN=EHI_146180 PE=3 SV=1	C4M3R0 (+2)	EHI_146180	24 kDa	0	0	0	0	0	0
Phenylalanine--tRNA ligase OS=Entamoeba histolytica HM-1:IMSS OX=294381 GN=EHI_078230 PE=3 SV=1	C4M538 (+2)	EHI_078230	56 kDa	0	0	0	0	0	0
3'-5' exonuclease domain-containing protein OS=Entamoeba histolytica HM-1:IMSS OX=294381 GN=EHI_148670 PE=4 SV=1	C4LT37 (+2)	EHI_148670	32 kDa	0	0	0	0.62236	0	0
Ubiquitin-activating enzyme, putative OS=Entamoeba histolytica HM-1:IMSS OX=294381 GN=EHI_020270 PE=3 SV=1	C4M7T9 (+1)	EHI_020270	112 kDa	0	0	0	1.2447	0	0
Calponin homology domain protein, putative OS=Entamoeba histolytica HM-1:IMSS OX=294381 GN=EHI_189500 PE=4 SV=1	C4M4N4	EHI_189500	117 kDa	0	0	0	0	0	0
RNA helicase OS=Entamoeba histolytica HM-1:IMSS OX=294381 GN=EHI_119920 PE=3 SV=1	C4M986 (+1)	EHI_119920	81 kDa	0	0	0	0	0	0
6-cysteine protein OS=Entamoeba histolytica HM-1:IMSS OX=294381 GN=EHI_069510 PE=4 SV=1	C4LWN9 (+2)	EHI_069510	17 kDa	0	0	0	0	0	0
Histone OS=Entamoeba histolytica HM-1:IMSS OX=294381 GN=EHI_027380 PE=4 SV=1	B1N3D8 (+2)	EHI_027380	24 kDa	0	0	0	0	0	0.63955
Hexokinase OS=Entamoeba histolytica HM-1:IMSS OX=294381 GN=EHI_098560 PE=4 SV=1	A0A8U0WP47	EHI_098560	49 kDa	0	0	0	0.62236	0	0
Uncharacterized protein OS=Entamoeba histolytica HM-1:IMSS OX=294381 GN=EHI_152290 PE=4 SV=1	B1N2F7 (+2)	EHI_152290	14 kDa	0	0	0	0	0	0.63955
Uncharacterized protein OS=Entamoeba histolytica HM-1:IMSS OX=294381 GN=EHI_106240 PE=4 SV=1	A0A8U0WP06 (+2)	EHI_106240	15 kDa	0	0	0	0	0	0
Rab family GTPase OS=Entamoeba histolytica HM-1:IMSS OX=294381 GN=EHI_082070 PE=4 SV=1	A0A8U0WNY7 (+2)	EHI_082070	23 kDa	0	0	0	0	0.71637	0
Uncharacterized protein OS=Entamoeba histolytica HM-1:IMSS OX=294381 GN=EHI_198660 PE=4 SV=1	C4LWR2 (+2)	EHI_198660	27 kDa	0	0	0	0	0	0
Importin beta family protein 3 OS=Entamoeba histolytica HM-1:IMSS OX=294381 GN=EHI_098340 PE=4 SV=1	C4LXB7 (+2)	EHI_098340	125 kDa	0	0	0	0	0	0.63955
Thioredoxin domain-containing protein OS=Entamoeba histolytica HM-1:IMSS OX=294381 GN=EHI_175280 PE=4 SV=1	B1N3J4 (+2)	EHI_175280	60 kDa	0	0	0	0	0	0
Glycosyltransferase, putative OS=Entamoeba histolytica HM-1:IMSS OX=294381 GN=EHI_085980 PE=4 SV=1	C4M353 (+2)	EHI_085980	155 kDa	0	0	0	0.62236	0.71637	0
Serine/threonine-protein phosphatase OS=Entamoeba histolytica HM-1:IMSS OX=294381 GN=EHI_147720 PE=3 SV=1	C4M907 (+1)	EHI_147720	35 kDa	0	0	0	0	0	0.63955
Rab family GTPase OS=Entamoeba histolytica HM-1:IMSS OX=294381 GN=EHI_026420 PE=4 SV=1	A0A8U0WPF5 (+2)	EHI_026420	22 kDa	0	0	0	0	0	0
AIG1 family protein OS=Entamoeba histolytica HM-1:IMSS OX=294381 GN=EHI_176580 PE=4 SV=1	C4MB73	EHI_176580	35 kDa	0	0	0	0	0	0
Uncharacterized protein OS=Entamoeba histolytica HM-1:IMSS OX=294381 GN=EHI_099340 PE=4 SV=1	C4M6C2 (+2)	EHI_099340	20 kDa	0	0	0	0	0	0
DEAD/DEAH box helicase, putative OS=Entamoeba histolytica HM-1:IMSS OX=294381 GN=EHI_014080 PE=4 SV=1	C4LXP7 (+2)	EHI_014080	74 kDa	0	0	0	0	0	0
Uncharacterized protein OS=Entamoeba histolytica HM-1:IMSS OX=294381 GN=EHI_188780 PE=4 SV=1	C4M2U5 (+2)	EHI_188780	18 kDa	0	0	0	0	0	0
DNA-directed RNA polymerase II subunit, putative OS=Entamoeba histolytica HM-1:IMSS OX=294381 GN=EHI_178010 PE=3 SV=1	C4M554 (+2)	EHI_178010	33 kDa	0	0	0	0	0	0
DNA-directed RNA polymerase III subunit RPC5 OS=Entamoeba histolytica HM-1:IMSS OX=294381 GN=EHI_064620 PE=4 SV=1	C4M0C8 (+2)	EHI_064620	64 kDa	0	0	0	1.2447	0.71637	0
HD domain-containing protein OS=Entamoeba histolytica HM-1:IMSS OX=294381 GN=EHI_110510 PE=4 SV=1	C4LUA0 (+1)	EHI_110510	53 kDa	0	0	0	0	0	0.63955
Nucleoporin autopeptidase OS=Entamoeba histolytica HM-1:IMSS OX=294381 GN=EHI_193440 PE=4 SV=1	C4M4U8 (+2)	EHI_193440	29 kDa	0	0	0	0	0	0
Signal recognition particle 54 kDa protein OS=Entamoeba histolytica HM-1:IMSS OX=294381 GN=EHI_004750 PE=3 SV=1	C4M071 (+2)	EHI_004750	54 kDa	0	0	0	0.62236	0	0
Uncharacterized protein OS=Entamoeba histolytica HM-1:IMSS OX=294381 GN=EHI_155340 PE=4 SV=1	C4LW87 (+2)	EHI_155340	24 kDa	0	0	0	0	0	0
RING-type domain-containing protein OS=Entamoeba histolytica HM-1:IMSS OX=294381 GN=EHI_013240 PE=4 SV=1	C4LX90 (+2)	EHI_013240	234 kDa	0	0	0	0	0	0
RNA-binding protein, putative OS=Entamoeba histolytica HM-1:IMSS OX=294381 GN=EHI_151990 PE=4 SV=1	C4LSN8 (+1)	EHI_151990	35 kDa	0	0	0	0	0	0
FAM83 domain-containing protein OS=Entamoeba histolytica HM-1:IMSS OX=294381 GN=EHI_173490 PE=4 SV=1	C4M6I3 (+2)	EHI_173490	43 kDa	0	0	0	0	0	0
Rab family GTPase OS=Entamoeba histolytica HM-1:IMSS OX=294381 GN=EHI_096440 PE=4 SV=1	A0A8U0WPK2 (+2)	EHI_096440	21 kDa	0	0	0	0	0.71637	0
WD domain containing protein OS=Entamoeba histolytica HM-1:IMSS OX=294381 GN=EHI_023870 PE=4 SV=1	C4M7I9 (+2)	EHI_023870	79 kDa	0	0	0	0	0	0
Protein kinase, putative OS=Entamoeba histolytica HM-1:IMSS OX=294381 GN=EHI_057680 PE=4 SV=1	C4M700 (+2)	EHI_057680	122 kDa	0	0	0	0	0	0
DNA-directed RNA polymerase subunit OS=Entamoeba histolytica HM-1:IMSS OX=294381 GN=EHI_044620 PE=3 SV=1	C4LT84	EHI_044620	14 kDa	0	0	0	0	0	0
WD repeat-containing protein OS=Entamoeba histolytica HM-1:IMSS OX=294381 GN=EHI_006060 PE=3 SV=1	C4M2P0 (+2)	EHI_006060	41 kDa	0	0	0	0.62236	0	0
NopRA1 domain-containing protein OS=Entamoeba histolytica HM-1:IMSS OX=294381 GN=EHI_009600 PE=4 SV=1	C4LZ34 (+2)	EHI_009600	192 kDa	0	0	0	0	0	0
Transmembrane protein OS=Entamoeba histolytica HM-1:IMSS OX=294381 GN=EHI_125940 PE=4 SV=1	C4LVX9 (+2)	EHI_125940	29 kDa	0	0	0	0.62236	0.71637	0
RRM domain-containing protein OS=Entamoeba histolytica HM-1:IMSS OX=294381 GN=EHI_135760 PE=4 SV=1	C4M966 (+2)	EHI_135760	13 kDa	0	0	0	0	0	0
Enhancer binding protein 2 (EBP2), putative OS=Entamoeba histolytica HM-1:IMSS OX=294381 GN=EHI_056380 PE=4 SV=1	C4M6Y8 (+2)	EHI_056380	26 kDa	0	0	0	0	0.71637	0
Proteasome subunit beta OS=Entamoeba histolytica HM-1:IMSS OX=294381 GN=EHI_078710 PE=3 SV=1	C4M4F3 (+2)	EHI_078710	22 kDa	0	0	0	0	0	0
Transmembrane protein OS=Entamoeba histolytica HM-1:IMSS OX=294381 GN=EHI_049350 PE=4 SV=1	C4LUD7 (+2)	EHI_049350	62 kDa	0	0	0	0	1.4327	0
U3 small nucleolar ribonucleo protein protein MPP10, putative OS=Entamoeba histolytica HM-1:IMSS OX=294381 GN=EHI_048860 PE=3 SV=1	B1N5H2 (+3)	EHI_048860	25 kDa	0	0	0	0	0	0
Meiotic check point regulator, putative OS=Entamoeba histolytica HM-1:IMSS OX=294381 GN=EHI_189910 PE=4 SV=1	C4M722 (+2)	EHI_189910	91 kDa	0	0	0	0	0	0
IgGFc_binding domain-containing protein OS=Entamoeba histolytica HM-1:IMSS OX=294381 GN=EHI_000710 PE=4 SV=1	C4LZC0 (+2)	EHI_000710	103 kDa	0	0	0	0	0	0
Transcriptional regulator OS=Entamoeba histolytica HM-1:IMSS-B OX=885319 GN=EHI8A_061100 PE=4 SV=1	M3U186 (+1)	EHI8A_061100	22 kDa	0	0	0	0	0	0.63955
Elongation factor-2 kinase, putative OS=Entamoeba histolytica HM-1:IMSS OX=294381 GN=EHI_090240 PE=4 SV=1	C4M8H2 (+2)	EHI_090240	46 kDa	0	0	0	0.62236	0.71637	0.63955
AB hydrolase-1 domain-containing protein OS=Entamoeba histolytica HM-1:IMSS OX=294381 GN=EHI_016410 PE=4 SV=1	C4M3W3 (+2)	EHI_016410	56 kDa	0	0	0	0	0	0
Uncharacterized protein OS=Entamoeba histolytica HM-1:IMSS OX=294381 GN=EHI_134670 PE=4 SV=1	C4M016 (+2)	EHI_134670	33 kDa	0	0	0	0	0	0
Calcium-transporting ATPase OS=Entamoeba histolytica HM-1:IMSS OX=294381 GN=EHI_030830 PE=3 SV=1	C4M1F1 (+2)	EHI_030830	114 kDa	0	0	0	0.62236	0	0
Damaged DNA binding protein, putative OS=Entamoeba histolytica HM-1:IMSS OX=294381 GN=EHI_194860 PE=3 SV=1	C4M401 (+2)	EHI_194860	124 kDa	0	0	0	1.8671	0	0
Ragulator complex protein LAMTOR1 OS=Entamoeba histolytica HM-1:IMSS OX=294381 GN=EHI_142900 PE=4 SV=1	C4M6D7 (+2)	EHI_142900	17 kDa	0	0	0	0.62236	0	0
Ras family GTPase OS=Entamoeba histolytica HM-1:IMSS OX=294381 GN=EHI_004860 PE=3 SV=1	C4M081 (+2)	EHI_004860	21 kDa	0	0	0	0	0	0
GTP-binding protein, putative OS=Entamoeba histolytica HM-1:IMSS OX=294381 GN=EHI_178770 PE=3 SV=1	C4LUU1 (+2)	EHI_178770	36 kDa	0	0	0	0	0	0
TPR_REGION domain-containing protein OS=Entamoeba histolytica HM-1:IMSS OX=294381 GN=EHI_118470 PE=4 SV=1	C4LYK8 (+2)	EHI_118470	59 kDa	0	0	0	0	0	0.63955
Dolichyl-diphosphooligosaccharide--protein glycosyltransferase subunit 1 OS=Entamoeba histolytica HM-1:IMSS OX=294381 GN=EHI_093790 PE=3 SV=1	C4LYH0	EHI_093790	49 kDa	0	0	0	0	0	0
C2 NT-type domain-containing protein OS=Entamoeba histolytica HM-1:IMSS OX=294381 GN=EHI_169670 PE=4 SV=1	C4M8U8 (+2)	EHI_169670	99 kDa	0	0	0	1.2447	0.71637	0
Importin N-terminal domain-containing protein OS=Entamoeba histolytica HM-1:IMSS OX=294381 GN=EHI_164410 PE=3 SV=1	C4M1S3 (+1)	EHI_164410	110 kDa	0	0	0	0	0	0
DEAD/DEAH box helicase, putative OS=Entamoeba histolytica HM-1:IMSS OX=294381 GN=EHI_165110 PE=3 SV=1	C4M1Z3 (+2)	EHI_165110	64 kDa	0	0	0	0	0	0
KID repeat-containing protein OS=Entamoeba histolytica HM-1:IMSS-A OX=885318 GN=EHI7A_102720 PE=4 SV=1	N9V3T3	EHI7A_102720	197 kDa	0	0	0	0	0	0
Uncharacterized protein OS=Entamoeba histolytica HM-1:IMSS OX=294381 GN=EHI_104740 PE=4 SV=1	C4LZ82 (+2)	EHI_104740	22 kDa	0	0	0	0	0	0
Inositol-3-phosphate synthase OS=Entamoeba histolytica HM-1:IMSS OX=294381 GN=EHI_070720 PE=3 SV=1	C4M5S9	EHI_070720	57 kDa	0	2.7624	0	0.62236	0	0
Uncharacterized protein OS=Entamoeba histolytica HM-1:IMSS OX=294381 GN=EHI_168230 PE=3 SV=1	C4M4Q9 (+2)	EHI_168230	25 kDa	0	0	0	0	0	0
Actin-like protein OS=Entamoeba histolytica HM-1:IMSS OX=294381 GN=EHI_060390 PE=4 SV=1	C4M6J4 (+2)	EHI_060390	62 kDa	0	0	0	0	0.71637	0
Erf4 domain-containing protein OS=Entamoeba histolytica HM-1:IMSS OX=294381 GN=EHI_111030 PE=4 SV=1	C4LT62	EHI_111030	15 kDa	0	0	0	0	0	0
PHD-type domain-containing protein OS=Entamoeba histolytica HM-1:IMSS OX=294381 GN=EHI_153030 PE=4 SV=1	B1N2D5	EHI_153030	80 kDa	0	0	0	0.62236	0	0
Importin beta-3 family protein, putative OS=Entamoeba histolytica HM-1:IMSS OX=294381 GN=EHI_081250 PE=4 SV=1	C4M5B0 (+2)	EHI_081250	123 kDa	0	0	0	0	0	0
CULLIN_2 domain-containing protein OS=Entamoeba histolytica HM-1:IMSS OX=294381 GN=EHI_179950 PE=3 SV=1	C4M646 (+2)	EHI_179950	74 kDa	0	0	0	0	0	0
Phospholipase B-like OS=Entamoeba histolytica HM-1:IMSS OX=294381 GN=EHI_069380 PE=3 SV=1	C4LWM6 (+2)	EHI_069380	61 kDa	0	0	0	0	0	0
Mediator complex subunit 15 OS=Entamoeba histolytica HM-1:IMSS OX=294381 GN=EHI_135020 PE=3 SV=1	C4M0Y9 (+2)	EHI_135020	40 kDa	0	0	0	0	0	0
Exportin-T OS=Entamoeba histolytica HM-1:IMSS OX=294381 GN=EHI_029040 PE=3 SV=1	C4M4W8 (+1)	EHI_029040	105 kDa	0	0	0	0	0	1.2791
Short chain dehydrogenase family protein OS=Entamoeba histolytica HM-1:IMSS OX=294381 GN=EHI_165070 PE=3 SV=1	C4M1Y9 (+2)	EHI_165070	37 kDa	0	0	0	0	0	0
MRG domain-containing protein OS=Entamoeba histolytica HM-1:IMSS OX=294381 GN=EHI_067880 PE=4 SV=1	C4LTY4 (+2)	EHI_067880	26 kDa	0	0	0	0	0	0
Uncharacterized protein OS=Entamoeba histolytica HM-1:IMSS OX=294381 GN=EHI_001140 PE=4 SV=1	C4M1J4 (+2)	EHI_001140	42 kDa	0	0	0	0.62236	0	0
Uncharacterized protein OS=Entamoeba histolytica HM-1:IMSS OX=294381 GN=EHI_062960 PE=4 SV=1	C4M8G4	EHI_062960	24 kDa	0	0	0	0.62236	0.71637	0
Importin beta-3 subunit family protein, putative OS=Entamoeba histolytica HM-1:IMSS OX=294381 GN=EHI_196970 PE=4 SV=1	C4LVB5 (+2)	EHI_196970	109 kDa	0	0	0	0	0	0
CAP-Gly domain-containing protein OS=Entamoeba histolytica HM-1:IMSS OX=294381 GN=EHI_051740 PE=4 SV=1	C4LY70	EHI_051740	41 kDa	0	0	0	0	0	0
BRCT domain-containing protein OS=Entamoeba histolytica HM-1:IMSS OX=294381 GN=EHI_074030 PE=4 SV=1	C4M2Z2 (+2)	EHI_074030	82 kDa	0	0	0	0	0	0
Filopodin, putative OS=Entamoeba histolytica HM-1:IMSS OX=294381 GN=EHI_167130 PE=4 SV=1	C4LYB3 (+2)	EHI_167130	180 kDa	0	0	0	0	0	0.63955
DNMT1-RFD domain-containing protein OS=Entamoeba histolytica HM-1:IMSS OX=294381 GN=EHI_078540 PE=4 SV=1	B1N3P6	EHI_078540	15 kDa	0	0	0	0	0	0
RNA recognition motif domain containing protein OS=Entamoeba histolytica HM-1:IMSS OX=294381 GN=EHI_014120 PE=4 SV=1	C4LXQ1 (+2)	EHI_014120	79 kDa	0	0	0	0	0	0
U3 small nucleolar ribonucleoprotein protein IMP4, putative OS=Entamoeba histolytica HM-1:IMSS OX=294381 GN=EHI_004900 PE=4 SV=1	C4M085 (+2)	EHI_004900	32 kDa	0	0	0	0	0	0
Bee-milk protein OS=Entamoeba histolytica HM-1:IMSS OX=294381 GN=EHI_141330 PE=4 SV=1	C4LW18	EHI_141330	51 kDa	0	0	0	0	0.71637	0.63955
Claudin OS=Entamoeba histolytica HM-1:IMSS OX=294381 GN=EHI_169900 PE=4 SV=1	C4M1B3 (+2)	EHI_169900	21 kDa	0	0	0	0	0	0
Thioredoxin domain-containing protein OS=Entamoeba histolytica HM-1:IMSS OX=294381 GN=EHI_017000 PE=4 SV=1	C4MAK2 (+2)	EHI_017000	65 kDa	0	0	0	0	0	0
Proteasome regulatory subunit, putative OS=Entamoeba histolytica HM-1:IMSS OX=294381 GN=EHI_179970 PE=4 SV=1	C4M648 (+2)	EHI_179970	54 kDa	0	0	0	0	0	0
Uncharacterized protein OS=Entamoeba histolytica HM-1:IMSS OX=294381 GN=EHI_138470 PE=4 SV=1	C4M3I9 (+2)	EHI_138470	19 kDa	0	0	0	0	0.71637	0.63955
N-acetylmuraminidase OS=Entamoeba histolytica HM-1:IMSS OX=294381 GN=EHI_014400 PE=4 SV=1	C4LXS4 (+2)	EHI_014400	24 kDa	0	0	0	0	0	0
Rab family GTPase OS=Entamoeba histolytica HM-1:IMSS OX=294381 GN=EHI_117960 PE=4 SV=1	A0A8U0WP66 (+2)	EHI_117960	21 kDa	0	0	0	0.62236	0	0
Heat shock protein 70, mitochondrial, putative OS=Entamoeba histolytica HM-1:IMSS OX=294381 GN=EHI_127700 PE=3 SV=1	B1N4X0	EHI_127700	67 kDa	0	0	0	0	0	0
TPR-like protein OS=Entamoeba histolytica HM-1:IMSS OX=294381 GN=EHI_098390 PE=4 SV=1	C4LXC1 (+2)	EHI_098390	69 kDa	0	0	0	0	0	0
Variant sh3 domain containing protein OS=Entamoeba histolytica HM-1:IMSS OX=294381 GN=EHI_110690 PE=4 SV=1	C4LUB6 (+2)	EHI_110690	42 kDa	0	0	0	0	0	0
G2/mitotic-specific cyclin-B3 OS=Entamoeba histolytica HM-1:IMSS OX=294381 GN=EHI_030880 PE=3 SV=1	C4M1F5 (+2)	EHI_030880	35 kDa	0	0	0	0	0	0
Cylicin-2 OS=Entamoeba histolytica HM-1:IMSS OX=294381 GN=EHI_107170 PE=4 SV=1	C4M158 (+2)	EHI_107170	50 kDa	0	0	0	0.62236	1.4327	0.63955
RNA recognition motif domain containing protein OS=Entamoeba histolytica HM-1:IMSS OX=294381 GN=EHI_183240 PE=4 SV=1	C4LV95 (+2)	EHI_183240	23 kDa	0	0	0	0	0	0
Uncharacterized protein OS=Entamoeba histolytica HM-1:IMSS OX=294381 GN=EHI_194370 PE=4 SV=1	C4LZV0 (+2)	EHI_194370	33 kDa	0	0	0	0	0	0
Ricin B-type lectin domain-containing protein OS=Entamoeba histolytica HM-1:IMSS OX=294381 GN=EHI_175040 PE=4 SV=1	C4LZM9 (+2)	EHI_175040	67 kDa	0	0	0	0	0	0
Uncharacterized protein OS=Entamoeba histolytica HM-1:IMSS-B OX=885319 GN=EHI8A_098210 PE=4 SV=1	M3TR94	EHI8A_098210	20 kDa	0	0	0	0	0	0
Mic1 domain-containing protein OS=Entamoeba histolytica HM-1:IMSS OX=294381 GN=EHI_140680 PE=4 SV=1	C4M3P0 (+2)	EHI_140680	75 kDa	0	0	0	0	0	0
RAP domain-containing protein OS=Entamoeba histolytica HM-1:IMSS OX=294381 GN=EHI_176160 PE=4 SV=1	C4MB23 (+2)	EHI_176160	86 kDa	0	0	0	0	0	0
60S acidic ribosomal protein P1, putative OS=Entamoeba histolytica HM-1:IMSS OX=294381 GN=EHI_104660 PE=3 SV=1	C4LZ75 (+2)	EHI_104660	11 kDa	0	0	0	0	0	0
Serine O-acetyltransferase OS=Entamoeba histolytica HM-1:IMSS-B OX=885319 GN=EHI8A_063040 PE=3 SV=1	M3S676 (+1)	EHI8A_063040	34 kDa	0	0	0	0	0	0
Uncharacterized protein OS=Entamoeba histolytica HM-1:IMSS OX=294381 GN=EHI_032780 PE=4 SV=1	B1N413 (+2)	EHI_032780	12 kDa	0	0	0	0	0	0
AATF-Che1 domain-containing protein OS=Entamoeba histolytica HM-1:IMSS OX=294381 GN=EHI_142050 PE=4 SV=1	C4LW50 (+1)	EHI_142050	46 kDa	0	0	0	0	0	0
Coatomer alpha subunit, putative OS=Entamoeba histolytica HM-1:IMSS OX=294381 GN=EHI_088090 PE=4 SV=1	A0A8U0WPY0 (+2)	EHI_088090	90 kDa	0	0	0	0	0	0
NPL domain-containing protein OS=Entamoeba histolytica HM-1:IMSS OX=294381 GN=EHI_147550 PE=4 SV=1	C4M6L9 (+2)	EHI_147550	31 kDa	0	0	0	0	0	0
Uncharacterized protein OS=Entamoeba histolytica HM-1:IMSS OX=294381 GN=EHI_178470 PE=4 SV=1	C4LUR3 (+2)	EHI_178470	98 kDa	0	0	0	0	0	0
FACT complex subunit OS=Entamoeba histolytica HM-1:IMSS OX=294381 GN=EHI_109860 PE=3 SV=1	C4M3K5 (+2)	EHI_109860	93 kDa	0	0	0	0	0	0
SHSP domain-containing protein OS=Entamoeba histolytica HM-1:IMSS OX=294381 GN=EHI_184220 PE=3 SV=1	C4M9Z8 (+2)	EHI_184220	61 kDa	0	0	0	0	0	0
Insulin-like growth factor 2 receptor OS=Entamoeba histolytica HM-1:IMSS OX=294381 GN=EHI_012340 PE=4 SV=1	C4LTM7 (+2)	EHI_012340	98 kDa	0	0	0	0	0	0
Autotransporter domain-containing protein OS=Entamoeba histolytica HM-1:IMSS OX=294381 GN=EHI_099780 PE=4 SV=1	C4M6F8 (+2)	EHI_099780	97 kDa	0	0	0	0	0	0
Protein tyrosine kinase domain-containing protein OS=Entamoeba histolytica HM-1:IMSS OX=294381 GN=EHI_197350 PE=4 SV=1	C4LVF1 (+2)	EHI_197350	121 kDa	0	0	0	0	0	0
MFS domain-containing protein OS=Entamoeba histolytica HM-1:IMSS OX=294381 GN=EHI_194990 PE=4 SV=1	C4M404 (+2)	EHI_194990	65 kDa	0	0	0	0	0.71637	0
Thioredoxin, putative OS=Entamoeba histolytica HM-1:IMSS OX=294381 GN=EHI_105860 PE=4 SV=1	C4M9H2 (+2)	EHI_105860	13 kDa	0	0	0	0	0	0
rRNA-processing protein FYV7 OS=Entamoeba histolytica HM-1:IMSS OX=294381 GN=EHI_140020 PE=4 SV=1	C4M960 (+2)	EHI_140020	21 kDa	0	0	0	0	0	0
Signal recognition particle GTPase OS=Entamoeba histolytica HM-1:IMSS OX=294381 GN=EHI_110600 PE=4 SV=1	C4LUA9 (+2)	EHI_110600	12 kDa	0	0	0	0	0	0
Mob1/phocein family protein OS=Entamoeba histolytica HM-1:IMSS OX=294381 GN=EHI_148520 PE=4 SV=1	C4LT22 (+2)	EHI_148520	25 kDa	0	0	0	0	0	0.63955
PH domain protein OS=Entamoeba histolytica HM-1:IMSS OX=294381 GN=EHI_127260 PE=4 SV=1	C4LWZ8 (+1)	EHI_127260	24 kDa	0	0	0	0	0	0
Protein MAK16 homolog OS=Entamoeba histolytica HM-1:IMSS OX=294381 GN=EHI_198690 PE=3 SV=1	C4LWR5 (+2)	EHI_198690	32 kDa	0	0	0	0.62236	0	0
Uncharacterized protein OS=Entamoeba histolytica HM-1:IMSS OX=294381 GN=EHI_113940 PE=4 SV=1	C4M8W0 (+1)	EHI_113940	38 kDa	0	0	0	0	0	0
Importin subunit alpha-2 OS=Entamoeba histolytica HM-1:IMSS OX=294381 GN=EHI_087620 PE=4 SV=1	C4LXU4 (+2)	EHI_087620	56 kDa	0	0	0	0	0	0
Importin subunit alpha OS=Entamoeba histolytica HM-1:IMSS OX=294381 GN=EHI_078270 PE=4 SV=1	C4M542 (+2)	EHI_078270	86 kDa	0	0	0	0	0	0
Retinoblatoma-binding protein 6, putative OS=Entamoeba histolytica HM-1:IMSS OX=294381 GN=EHI_014000 PE=4 SV=1	C4LXP1 (+2)	EHI_014000	45 kDa	0	0	0	0	0	0
VWFA domain-containing protein OS=Entamoeba histolytica HM-1:IMSS OX=294381 GN=EHI_096810 PE=4 SV=1	C4LWJ1 (+2)	EHI_096810	54 kDa	0	0	0	0	0	0
Transporter, major facilitator family OS=Entamoeba histolytica HM-1:IMSS OX=294381 GN=EHI_051720 PE=4 SV=1	C4LY68	EHI_051720	59 kDa	0	0	0	0	0	0
Rab GDP dissociation inhibitor OS=Entamoeba histolytica HM-1:IMSS OX=294381 GN=EHI_167060 PE=3 SV=1	B1N309 (+1)	EHI_167060	49 kDa	0	0	0	0	0	0
Protein kinase domain containing protein OS=Entamoeba histolytica HM-1:IMSS OX=294381 GN=EHI_166470 PE=4 SV=1	C4M7F3	EHI_166470	38 kDa	0	0	0	0	0	0
DH domain-containing protein OS=Entamoeba histolytica HM-1:IMSS OX=294381 GN=EHI_148600 PE=4 SV=1	C4LT30 (+2)	EHI_148600	100 kDa	0	0	0	0	0	0.63955
Uncharacterized protein OS=Entamoeba histolytica HM-1:IMSS OX=294381 GN=EHI_098800 PE=4 SV=1	C4M882 (+2)	EHI_098800	41 kDa	0	0	0	0	0	0
HEAT repeat domain containing protein OS=Entamoeba histolytica HM-1:IMSS OX=294381 GN=EHI_097470 PE=4 SV=1	C4M930 (+2)	EHI_097470	118 kDa	0	0	0	0	0	0
Protein kinase domain-containing protein OS=Entamoeba histolytica HM-1:IMSS OX=294381 GN=EHI_058120 PE=4 SV=1	C4M8B3 (+2)	EHI_058120	59 kDa	0	0	0	0	0.71637	0
tRNA (guanine(46)-N(7))-methyltransferase OS=Entamoeba histolytica HM-1:IMSS OX=294381 GN=EHI_128170 PE=4 SV=1	B1N3S7 (+2)	EHI_128170	62 kDa	0	0	0	0	0	0
Actin, putative OS=Entamoeba histolytica HM-1:IMSS OX=294381 GN=EHI_163580 PE=3 SV=1	C4M3T9 (+2)	EHI_163580	41 kDa	0	0	0	0	0	1.2791
TFIIB-type domain-containing protein OS=Entamoeba histolytica HM-1:IMSS OX=294381 GN=EHI_126050 PE=4 SV=1	C4LVZ0 (+2)	EHI_126050	106 kDa	0	0	0	0	0	0
DnaJ_C domain-containing protein OS=Entamoeba histolytica HM-1:IMSS OX=294381 GN=EHI_110820 PE=4 SV=1	C4LUC8	EHI_110820	56 kDa	0	0	0	0	0	0
Dilute domain-containing protein OS=Entamoeba histolytica HM-1:IMSS OX=294381 GN=EHI_192140 PE=4 SV=1	C4M754 (+2)	EHI_192140	67 kDa	0	0	0	0	0	0
F_actin_bund_C domain-containing protein OS=Entamoeba histolytica HM-1:IMSS OX=294381 GN=EHI_189930 PE=4 SV=1	C4M711 (+2)	EHI_189930	25 kDa	0	0	0	1.2447	1.4327	0
Nucleolar protein 12 OS=Entamoeba histolytica HM-1:IMSS OX=294381 GN=EHI_137710 PE=3 SV=1	C4LZD4 (+2)	EHI_137710	48 kDa	0	0	0	0	0	0
Uncharacterized protein OS=Entamoeba histolytica HM-1:IMSS OX=294381 GN=EHI_080860 PE=4 SV=1	C4MAD4 (+2)	EHI_080860	48 kDa	0	0	0	0	0	0
Myotubularin phosphatase domain-containing protein OS=Entamoeba histolytica HM-1:IMSS OX=294381 GN=EHI_016360 PE=4 SV=1	C4M3V8 (+2)	EHI_016360	67 kDa	0	0	0	0	0	0
Longin-type vesicle-associated membrane protein, putative OS=Entamoeba histolytica HM-1:IMSS OX=294381 GN=EHI_170040 PE=4 SV=1	A0A8U0WPP3 (+2)	EHI_170040	26 kDa	0	0	0	0	0	0
t-SNARE coiled-coil homology domain-containing protein OS=Entamoeba histolytica HM-1:IMSS-A OX=885318 GN=EHI7A_168250 PE=4 SV=1	N9TG06	EHI7A_168250	13 kDa	0	0	0	0	0	0
Rho GTPase activating protein, putative OS=Entamoeba histolytica HM-1:IMSS OX=294381 GN=EHI_035940 PE=4 SV=1	C4M7G0 (+1)	EHI_035940	62 kDa	0	0	0	0	0	0
Isoleucine--tRNA ligase OS=Entamoeba histolytica HM-1:IMSS OX=294381 GN=EHI_177660 PE=3 SV=1	C4LY19 (+2)	EHI_177660	123 kDa	0	0	2.9935	1.2447	0	0
Coatomer protein gamma subunit, putative OS=Entamoeba histolytica HM-1:IMSS OX=294381 GN=EHI_040700 PE=4 SV=1	A0A8U0WPW7 (+2)	EHI_040700	95 kDa	0	0	0	0	0	0
ATP-dependent helicase, putative OS=Entamoeba histolytica HM-1:IMSS OX=294381 GN=EHI_077640 PE=4 SV=1	C4M8N6 (+1)	EHI_077640	105 kDa	0	0	0	0	0	0
Uncharacterized protein OS=Entamoeba histolytica HM-1:IMSS OX=294381 GN=EHI_065710 PE=4 SV=1	C4LZY7 (+2)	EHI_065710	22 kDa	0	0	0	0	0	0.63955
Protein HIRA OS=Entamoeba histolytica HM-1:IMSS OX=294381 GN=EHI_131950 PE=3 SV=1	C4M5F1 (+2)	EHI_131950	95 kDa	0	0	0	0	0	0
PCTP-like protein, putative OS=Entamoeba histolytica HM-1:IMSS OX=294381 GN=EHI_110720 PE=4 SV=1	C4LUB9 (+1)	EHI_110720	31 kDa	0	0	2.9935	0	0	0
COP9 signalosome complex subunit 1, putative OS=Entamoeba histolytica HM-1:IMSS OX=294381 GN=EHI_182890 PE=4 SV=1	A0A8U0WPD1 (+2)	EHI_182890	45 kDa	0	0	0	1.8671	0	0
Phospholipid-transporting ATPase OS=Entamoeba histolytica HM-1:IMSS OX=294381 GN=EHI_140130 PE=3 SV=1	C4M462 (+2)	EHI_140130	152 kDa	0	0	0	0	0	0
26S protease regulatory subunit, putative OS=Entamoeba histolytica HM-1:IMSS OX=294381 GN=EHI_194570 PE=3 SV=1	C4LZW8 (+2)	EHI_194570	44 kDa	0	0	0	0	0	0
DNA-directed RNA polymerase I subunit RPA43 OS=Entamoeba histolytica HM-1:IMSS OX=294381 GN=EHI_124360 PE=4 SV=1	B1N352 (+2)	EHI_124360	24 kDa	0	0	0	0	0	0
Glycosylphosphatidylinositol anchor attachment 1 protein OS=Entamoeba histolytica HM-1:IMSS OX=294381 GN=EHI_196400 PE=4 SV=1	C4M9R2 (+2)	EHI_196400	68 kDa	0	0	0	0	0	0
Ribosome biogenesis regulatory protein OS=Entamoeba histolytica HM-1:IMSS-B OX=885319 GN=EHI8A_140470 PE=4 SV=1	M3TLZ8 (+1)	EHI8A_140470	23 kDa	0	0	0	0	0	0
Vacuolar protein sorting 35, putative OS=Entamoeba histolytica HM-1:IMSS OX=294381 GN=EHI_041950 PE=3 SV=1	C4M4G0 (+2)	EHI_041950	85 kDa	0	0	0	0	0	0
Nuclear cap-binding protein subunit 2 OS=Entamoeba histolytica HM-1:IMSS OX=294381 GN=EHI_156270 PE=3 SV=1	C4M4C7 (+2)	EHI_156270	22 kDa	0	0	0	0	0	0
ATPase, AAA family protein OS=Entamoeba histolytica HM-1:IMSS OX=294381 GN=EHI_081930 PE=4 SV=1	C4M5T5 (+2)	EHI_081930	106 kDa	0	0	0	0	0	0
DEK_C domain-containing protein OS=Entamoeba histolytica HM-1:IMSS OX=294381 GN=EHI_165130 PE=4 SV=1	C4M1Z5 (+2)	EHI_165130	32 kDa	0	0	0	0	0	0
Protein kinase domain containing protein OS=Entamoeba histolytica HM-1:IMSS OX=294381 GN=EHI_081790 PE=4 SV=1	C4M695	EHI_081790	133 kDa	0	0	0	0	0	0
Helicase ATP-binding domain-containing protein OS=Entamoeba histolytica HM-1:IMSS OX=294381 GN=EHI_009670 PE=4 SV=1	C4LZ41 (+2)	EHI_009670	129 kDa	0	0	0	0.62236	0	0
DNA-directed RNA polymerase III subunit RPC9 OS=Entamoeba histolytica HM-1:IMSS OX=294381 GN=EHI_038850 PE=4 SV=1	B1N361 (+2)	EHI_038850	14 kDa	0	0	0	0	0	0
Proteasome regulatory subunit, putative OS=Entamoeba histolytica HM-1:IMSS OX=294381 GN=EHI_054230 PE=4 SV=1	C4M6T7 (+2)	EHI_054230	32 kDa	0	0	0	0	0	0
GOLD domain-containing protein OS=Entamoeba histolytica HM-1:IMSS OX=294381 GN=EHI_138080 PE=3 SV=1	C4LZG8 (+2)	EHI_138080	23 kDa	0	0	0	0	0	0
PINc domain-containing protein OS=Entamoeba histolytica HM-1:IMSS OX=294381 GN=EHI_056460 PE=3 SV=1	C4M6Z5 (+2)	EHI_056460	22 kDa	0	0	0	0	0	0
Rab family GTPase OS=Entamoeba histolytica HM-1:IMSS OX=294381 GN=EHI_128110 PE=4 SV=1	A0A8U0WQ17 (+2)	EHI_128110	26 kDa	0	0	0	0	0.71637	0
Thioredoxin, putative OS=Entamoeba histolytica HM-1:IMSS OX=294381 GN=EHI_170420 PE=4 SV=1	C4M7K9 (+2)	EHI_170420	13 kDa	0	0	2.9935	0	0	0
Rho guanine nucleotide exchange factor, putative OS=Entamoeba histolytica HM-1:IMSS OX=294381 GN=EHI_039480 PE=4 SV=1	C4M8C8 (+2)	EHI_039480	96 kDa	0	0	0	0	0	0
Phosphatidylinositol 3-kinase, putative OS=Entamoeba histolytica HM-1:IMSS OX=294381 GN=EHI_095130 PE=3 SV=1	C4M4S6 (+2)	EHI_095130	130 kDa	0	0	0	0	0	0
RRM domain-containing protein OS=Entamoeba histolytica HM-1:IMSS OX=294381 GN=EHI_138050 PE=4 SV=1	C4LZG5 (+2)	EHI_138050	28 kDa	0	0	0	0	0	0
Calcineurin B subunit, putative OS=Entamoeba histolytica HM-1:IMSS OX=294381 GN=EHI_106670 PE=3 SV=1	C4MBI6 (+2)	EHI_106670	21 kDa	0	0	0	0	0	0
WD domain containing protein OS=Entamoeba histolytica HM-1:IMSS OX=294381 GN=EHI_103410 PE=4 SV=1	A0A8U0WQ03 (+1)	EHI_103410	111 kDa	0	0	2.9935	0	0	0
RGS domain-containing protein OS=Entamoeba histolytica HM-1:IMSS OX=294381 GN=EHI_174120 PE=4 SV=1	C4M260 (+2)	EHI_174120	52 kDa	0	0	0	0	0	0
WD_REPEATS_REGION domain-containing protein OS=Entamoeba histolytica HM-1:IMSS-B OX=885319 GN=EHI8A_179760 PE=3 SV=1	M3U5P6	EHI8A_179760	72 kDa	0	0	0	0	0	0
Rap/Ran GTPase-activating protein OS=Entamoeba histolytica HM-1:IMSS OX=294381 GN=EHI_143610 PE=4 SV=1	C4M807 (+2)	EHI_143610	77 kDa	0	0	0	0	0	0
Molybdenum cofactor sulfurase putative OS=Entamoeba histolytica HM-1:IMSS OX=294381 GN=EHI_194600 PE=4 SV=1	C4LZX1 (+2)	EHI_194600	60 kDa	0	0	0	0	0	0
Chaperonin 10 Kd subunit, putative OS=Entamoeba histolytica HM-1:IMSS OX=294381 GN=EHI_188880 PE=4 SV=1	A0A8U0WPX4 (+2)	EHI_188880	10 kDa	0	0	0	0	0	0
SMK-1 domain-containing protein OS=Entamoeba histolytica HM-1:IMSS-B OX=885319 GN=EHI8A_006710 PE=4 SV=1	M3SEF2	EHI8A_006710	104 kDa	0	0	0	0	0	0
Uncharacterized protein OS=Entamoeba histolytica HM-1:IMSS OX=294381 GN=EHI_023490 PE=4 SV=1	C4LUQ8 (+2)	EHI_023490	68 kDa	0	0	0	0	0	0
RNA recognition motif domain containing protein OS=Entamoeba histolytica HM-1:IMSS OX=294381 GN=EHI_092500 PE=4 SV=1	C4LV12 (+1)	EHI_092500	46 kDa	0	0	0	0	0	0
WD domain containing protein OS=Entamoeba histolytica HM-1:IMSS OX=294381 GN=EHI_168370 PE=4 SV=1	C4M4P7 (+2)	EHI_168370	58 kDa	0	0	0	0	0	0
60S acidic riboomal protein P1, putative OS=Entamoeba histolytica HM-1:IMSS OX=294381 GN=EHI_042920 PE=3 SV=1	C4M660 (+2)	EHI_042920	11 kDa	0	0	0	0	0	0
Importin alpha subunit, putative OS=Entamoeba histolytica HM-1:IMSS OX=294381 GN=EHI_131550 PE=4 SV=1	C4M9Y6 (+2)	EHI_131550	59 kDa	0	0	0	0	0	0
Ferric oxidoreductase domain-containing protein OS=Entamoeba histolytica HM-1:IMSS OX=294381 GN=EHI_170000 PE=4 SV=1	C4M1C2 (+2)	EHI_170000	61 kDa	0	0	0	0	0	0
Soluble NSF attachment protein gamma isoform, putative OS=Entamoeba histolytica HM-1:IMSS OX=294381 GN=EHI_136210 PE=3 SV=1	C4M2A1 (+2)	EHI_136210	41 kDa	0	0	0	0	0	0
3' exoribonuclease family protein OS=Entamoeba histolytica HM-1:IMSS OX=294381 GN=EHI_040320 PE=4 SV=1	C4M2G1 (+2)	EHI_040320	27 kDa	0	0	0	0	0	0
Eukaryotic translation initiation factor 5B OS=Entamoeba histolytica HM-1:IMSS OX=294381 GN=EHI_127340 PE=4 SV=1	C4LX06 (+2)	EHI_127340	102 kDa	0	0	0	0	0	0
Importin N-terminal domain-containing protein OS=Entamoeba histolytica HM-1:IMSS OX=294381 GN=EHI_126230 PE=3 SV=1	C4LW08 (+2)	EHI_126230	113 kDa	0	0	0	0	0	0
Papain family cysteine protease domain containing protein OS=Entamoeba histolytica HM-1:IMSS OX=294381 GN=EHI_050800 PE=4 SV=1	C4LTV0 (+2)	EHI_050800	65 kDa	0	0	0	0	0	0
DNA-directed RNA polymerase II subunit, putative OS=Entamoeba histolytica HM-1:IMSS OX=294381 GN=EHI_131150 PE=4 SV=1	C4LXI3 (+2)	EHI_131150	20 kDa	0	0	0	0	0	0
Ras family GTPase OS=Entamoeba histolytica HM-1:IMSS OX=294381 GN=EHI_091090 PE=3 SV=1	C4M7P6 (+2)	EHI_091090	23 kDa	0	0	0	0	0	0
3-ketoacyl-CoA synthase OS=Entamoeba histolytica HM-1:IMSS OX=294381 GN=EHI_158240 PE=3 SV=1	C4M2E3	EHI_158240	57 kDa	0	0	0	0	0	0
Fe-hydrogenase, putative OS=Entamoeba histolytica HM-1:IMSS OX=294381 GN=EHI_073390 PE=3 SV=1	C4LXK4 (+2)	EHI_073390	51 kDa	0	0	0	0	0	0
Ubiquitin-conjugating enzyme family protein OS=Entamoeba histolytica HM-1:IMSS OX=294381 GN=EHI_164400 PE=3 SV=1	C4M1S2 (+2)	EHI_164400	17 kDa	0	0	0	0	0	0
La ribonucleoprotein, putative OS=Entamoeba histolytica HM-1:IMSS OX=294381 GN=EHI_131040 PE=4 SV=1	C4LXH2 (+2)	EHI_131040	28 kDa	0	0	0	0	0	0
Uncharacterized protein OS=Entamoeba histolytica HM-1:IMSS OX=294381 GN=EHI_109870 PE=4 SV=1	C4M3K6 (+2)	EHI_109870	30 kDa	0	0	0	0	0	0
GRIP domain-containing protein (Fragment) OS=Entamoeba histolytica HM-1:IMSS-A OX=885318 GN=EHI7A_126300 PE=4 SV=1	N9UX51	EHI7A_126300	83 kDa	0	0	0	0	0	0
RNA-binding protein, putative OS=Entamoeba histolytica HM-1:IMSS OX=294381 GN=EHI_065870 PE=3 SV=1	C4M003 (+2)	EHI_065870	22 kDa	0	0	0	0	0	0
Oxysterol binding protein, putative OS=Entamoeba histolytica HM-1:IMSS OX=294381 GN=EHI_050360 PE=3 SV=1	C4LTR1	EHI_050360	83 kDa	0	0	0	0	0	0
GTP-binding protein, putative OS=Entamoeba histolytica HM-1:IMSS OX=294381 GN=EHI_023210 PE=3 SV=1	C4LUN2 (+2)	EHI_023210	35 kDa	0	0	0	0	0	0
Chaperonin-containing TCP-1, zeta subunit, putative OS=Entamoeba histolytica HM-1:IMSS OX=294381 GN=EHI_125800 PE=3 SV=1	C4LVW6	EHI_125800	60 kDa	0	0	0	0	0	0
Branchpoint-bridging protein OS=Entamoeba histolytica HM-1:IMSS OX=294381 GN=EHI_193510 PE=3 SV=1	C4M4V3 (+2)	EHI_193510	36 kDa	0	0	0	0	0	0
Transmembrane protein OS=Entamoeba histolytica HM-1:IMSS OX=294381 GN=EHI_030410 PE=4 SV=1	C4M454 (+2)	EHI_030410	40 kDa	0	0	0	0	0	0
DNA primase OS=Entamoeba histolytica HM-1:IMSS OX=294381 GN=EHI_103530 PE=3 SV=1	C4LVJ7 (+2)	EHI_103530	45 kDa	0	0	0	0	0	0
Proteasome endopeptidase complex OS=Entamoeba histolytica HM-1:IMSS OX=294381 GN=EHI_011870 PE=4 SV=1	C4LTI2 (+2)	EHI_011870	28 kDa	0	0	0	0	0	0
ADP-ribosylation factor, putative OS=Entamoeba histolytica HM-1:IMSS OX=294381 GN=EHI_073480 PE=4 SV=1	A0A8U0WNX8 (+2)	EHI_073480	20 kDa	0	0	0	0	0	0
MIT domain-containing protein OS=Entamoeba histolytica HM-1:IMSS OX=294381 GN=EHI_124410 PE=4 SV=1	C4LZH7 (+2)	EHI_124410	29 kDa	0	0	0	0	0	0
Nucleolar protein 10, putative OS=Entamoeba histolytica HM-1:IMSS OX=294381 GN=EHI_141370 PE=4 SV=1	C4LW22 (+2)	EHI_141370	48 kDa	0	0	0	0	0	0
Syntaxin, putative OS=Entamoeba histolytica HM-1:IMSS OX=294381 GN=EHI_164320 PE=4 SV=1	A0A8U0WPW9 (+1)	EHI_164320	32 kDa	0	0	0	0	0	0
UDP-glucose:glycoprotein glucosyltransferase, putative OS=Entamoeba histolytica HM-1:IMSS OX=294381 GN=EHI_015280 PE=4 SV=1	C4M0W6 (+2)	EHI_015280	150 kDa	0	0	0	0	0	0
Calcium-binding protein 1 (EhCBP1) OS=Entamoeba histolytica HM-1:IMSS OX=294381 GN=EHI_120900 PE=4 SV=1	C4M7Q6 (+2)	EHI_120900	15 kDa	0	0	2.9935	0	0	0
Telo_bind domain-containing protein OS=Entamoeba histolytica HM-1:IMSS OX=294381 GN=EHI_179020 PE=4 SV=1	C4LUW5 (+2)	EHI_179020	55 kDa	0	0	0	0	0	0
1,4-alpha-glucan branching enzyme OS=Entamoeba histolytica HM-1:IMSS OX=294381 GN=EHI_106090 PE=3 SV=1	C4M384 (+2)	EHI_106090	78 kDa	0	0	0	0	0	0.63955
Mitochondrial outer membrane protein porin 2-like OS=Entamoeba histolytica HM-1:IMSS OX=294381 GN=EHI_178630 PE=4 SV=1	C4LUS8 (+2)	EHI_178630	32 kDa	0	0	0	0	0	0
AAA domain-containing protein OS=Entamoeba histolytica HM-1:IMSS OX=294381 GN=EHI_128900 PE=4 SV=1	C4MBS4	EHI_128900	70 kDa	0	0	0	0	0.71637	0
Uncharacterized protein OS=Entamoeba histolytica HM-1:IMSS OX=294381 GN=EHI_045460 PE=4 SV=1	B1N2H7	EHI_045460	13 kDa	0	0	0	0	0	0
Protein SEY1 homolog OS=Entamoeba histolytica HM-1:IMSS-B OX=885319 GN=EHI8A_163750 PE=3 SV=1	M3UKL9 (+1)	EHI8A_163750	97 kDa	0	0	0	0	0	0
Transmembrane protein OS=Entamoeba histolytica HM-1:IMSS OX=294381 GN=EHI_142960 PE=4 SV=1	C4M6D2 (+2)	EHI_142960	61 kDa	0	0	0	0	0	0
DDB1- and CUL4-associated factor 13 OS=Entamoeba histolytica HM-1:IMSS OX=294381 GN=EHI_135930 PE=3 SV=1	C4MBB9	EHI_135930	53 kDa	0	0	0	0.62236	0	0
Uncharacterized protein OS=Entamoeba histolytica HM-1:IMSS OX=294381 GN=EHI_192260 PE=4 SV=1	B1N3B5 (+2)	EHI_192260	30 kDa	0	0	0	0	0	0
RNA-dependent RNA polymerase OS=Entamoeba histolytica HM-1:IMSS OX=294381 GN=EHI_179800 PE=3 SV=1	C4M631 (+2)	EHI_179800	96 kDa	0	0	0	0	0	0
Uncharacterized protein OS=Entamoeba histolytica HM-1:IMSS OX=294381 GN=EHI_078690 PE=4 SV=1	C4M4F1 (+2)	EHI_078690	41 kDa	0	0	0	0	0	0
Signal peptide protein OS=Entamoeba histolytica HM-1:IMSS OX=294381 GN=EHI_189460 PE=4 SV=1	C4M4N0 (+2)	EHI_189460	20 kDa	0	0	0	0	0	0
Cell cycle control protein cwf2, putative OS=Entamoeba histolytica HM-1:IMSS OX=294381 GN=EHI_126150 PE=3 SV=1	C4LW00 (+2)	EHI_126150	42 kDa	0	0	0	0	0	0
TATA-binding associated phosphoprotein OS=Entamoeba histolytica HM-1:IMSS OX=294381 GN=EHI_012250 PE=4 SV=1	C4LTL8 (+2)	EHI_012250	24 kDa	0	0	0	0	0	0
Resolvase/invertase-type recombinase catalytic domain-containing protein OS=Entamoeba histolytica HM-1:IMSS OX=294381 GN=EHI_081120 PE=4 SV=1	C4M5A8	EHI_081120	10 kDa	0	0	0	0	0	0
Ras-1, putative OS=Entamoeba histolytica HM-1:IMSS OX=294381 GN=EHI_124520 PE=3 SV=1	B1N354 (+2)	EHI_124520	23 kDa	0	0	0	0	0	0.63955
Heat shock protein 70, putative OS=Entamoeba histolytica HM-1:IMSS OX=294381 GN=EHI_133950 PE=3 SV=1	B1N3C9	EHI_133950	59 kDa	0	0	0	0	0	0
Shell matrix protein OS=Entamoeba histolytica HM-1:IMSS OX=294381 GN=EHI_143070 PE=4 SV=1	C4MAJ0 (+2)	EHI_143070	35 kDa	0	0	0	0	0	0
Cleavage and polyadenylation specificity factor 73 kDa subunit, putative OS=Entamoeba histolytica HM-1:IMSS OX=294381 GN=EHI_136170 PE=4 SV=1	C4M297 (+2)	EHI_136170	87 kDa	0	0	0	0	0	0
Structural maintenance of chromosomes protein OS=Entamoeba histolytica HM-1:IMSS OX=294381 GN=EHI_164820 PE=3 SV=1	C4M1X5 (+1)	EHI_164820	142 kDa	0	0	0	0	0	0
DNA damage-binding protein 1 OS=Entamoeba histolytica HM-1:IMSS OX=294381 GN=EHI_031270 PE=3 SV=1	C4M4K9 (+2)	EHI_031270	112 kDa	0	0	0	0	0	0
Protein SDA1 OS=Entamoeba histolytica HM-1:IMSS OX=294381 GN=EHI_009540 PE=3 SV=1	C4LZ30 (+2)	EHI_009540	84 kDa	0	0	0	0	0	0
Methyltransferase, putative OS=Entamoeba histolytica HM-1:IMSS OX=294381 GN=EHI_029570 PE=3 SV=1	C4M7V8 (+2)	EHI_029570	31 kDa	0	0	0	0	0	0
Zinc finger protein, putative OS=Entamoeba histolytica HM-1:IMSS OX=294381 GN=EHI_055640 PE=4 SV=1	C4M7A6 (+2)	EHI_055640	46 kDa	0	0	0	0	0	0
Threonine ammonia-lyase OS=Entamoeba histolytica HM-1:IMSS OX=294381 GN=EHI_092390 PE=3 SV=1	B1N2N4 (+1)	EHI_092390	45 kDa	0	0	0	0	0	0
Nucleolar complex-associated protein 3-like protein OS=Entamoeba histolytica HM-1:IMSS OX=294381 GN=EHI_119610 PE=3 SV=1	C4M7Y4 (+2)	EHI_119610	68 kDa	0	0	0	0	0	0
DUF3883 domain-containing protein OS=Entamoeba histolytica HM-1:IMSS OX=294381 GN=EHI_023330 PE=4 SV=1	C4LUP4 (+2)	EHI_023330	123 kDa	0	0	0	0	0	1.9187
Rho-GAP domain-containing protein OS=Entamoeba histolytica HM-1:IMSS OX=294381 GN=EHI_136460 PE=4 SV=1	C4M2B5 (+2)	EHI_136460	87 kDa	0	0	0	0	0	0
GATA zinc finger domain-containing protein 14-like OS=Entamoeba histolytica HM-1:IMSS OX=294381 GN=EHI_005940 PE=4 SV=1	C4M2M9 (+2)	EHI_005940	26 kDa	0	0	0	0	0	0
Serine carboxypeptidase (S28) family protein OS=Entamoeba histolytica HM-1:IMSS OX=294381 GN=EHI_037190 PE=3 SV=1	C4M7N4	EHI_037190	54 kDa	0	0	0	0	0	0
Proline--tRNA ligase OS=Entamoeba histolytica HM-1:IMSS OX=294381 GN=EHI_040400 PE=3 SV=1	C4M2G9 (+2)	EHI_040400	61 kDa	0	0	0	0.62236	0	0
Uncharacterized protein OS=Entamoeba histolytica HM-1:IMSS OX=294381 GN=EHI_134650 PE=4 SV=1	C4M014 (+2)	EHI_134650	44 kDa	0	0	0	0	0	0
Translocon-associated protein subunit alpha OS=Entamoeba histolytica HM-1:IMSS OX=294381 GN=EHI_083600 PE=4 SV=1	C4M944 (+2)	EHI_083600	24 kDa	0	0	0	0	0	0
Proteasome subunit alpha type OS=Entamoeba histolytica HM-1:IMSS OX=294381 GN=EHI_153190 PE=3 SV=1	C4LSB1 (+2)	EHI_153190	27 kDa	0	0	0	0	0	0
Exosome component 10, putative OS=Entamoeba histolytica HM-1:IMSS OX=294381 GN=EHI_021400 PE=4 SV=1	C4M054 (+2)	EHI_021400	61 kDa	0	0	0	0	0	0
Helicase, putative OS=Entamoeba histolytica HM-1:IMSS OX=294381 GN=EHI_090040 PE=3 SV=1	C4MA27 (+2)	EHI_090040	140 kDa	0	0	0	0	0	0
U3 small nucleolar ribonucleoprotein subunit, putative OS=Entamoeba histolytica HM-1:IMSS OX=294381 GN=EHI_035170 PE=3 SV=1	B1N507 (+1)	EHI_035170	22 kDa	0	0	0	0	0	0
Uncharacterized protein OS=Entamoeba histolytica HM-1:IMSS OX=294381 GN=EHI_164070 PE=4 SV=1	C4MBP0 (+1)	EHI_164070	29 kDa	0	0	0	0	0	0
ATPase, AAA family protein OS=Entamoeba histolytica HM-1:IMSS OX=294381 GN=EHI_141040 PE=4 SV=1	C4M511 (+2)	EHI_141040	104 kDa	0	0	0	0	0	0
Serine/threonine-protein kinase 3, putative OS=Entamoeba histolytica HM-1:IMSS OX=294381 GN=EHI_156670 PE=3 SV=1	C4MB14 (+2)	EHI_156670	40 kDa	0	0	0	0	0	0
Uncharacterized protein OS=Entamoeba histolytica HM-1:IMSS OX=294381 GN=EHI_199170 PE=4 SV=1	C4LWW2 (+1)	EHI_199170	35 kDa	0	0	0	0	0	0
Rap-GAP domain-containing protein OS=Entamoeba histolytica HM-1:IMSS OX=294381 GN=EHI_138990 PE=4 SV=1	B1N3Q0 (+1)	EHI_138990	160 kDa	0	0	0	0	0	0
DSBA domain-containing protein OS=Entamoeba histolytica HM-1:IMSS OX=294381 GN=EHI_002140 PE=4 SV=1	C4M817 (+2)	EHI_002140	24 kDa	0	0	0	0	0	0
Coiled-coil domain-containing protein 186 OS=Entamoeba histolytica HM-1:IMSS OX=294381 GN=EHI_065370 PE=4 SV=1	C4M6L4 (+1)	EHI_065370	37 kDa	0	0	0	0	0	0
Actin, putative OS=Entamoeba histolytica HM-1:IMSS OX=294381 GN=EHI_039070 PE=3 SV=1	C4LZS8 (+2)	EHI_039070	40 kDa	0	0	0	0	0	1.2791
Cleavage stimulation factor, putative OS=Entamoeba histolytica HM-1:IMSS OX=294381 GN=EHI_098370 PE=4 SV=1	B1N2W3 (+1)	EHI_098370	65 kDa	0	0	0	0	0	0
Glutamic acid-rich protein OS=Entamoeba histolytica HM-1:IMSS OX=294381 GN=EHI_062670 PE=4 SV=1	C4M1P3 (+2)	EHI_062670	83 kDa	0	0	0	0	0	0
Uncharacterized protein OS=Entamoeba histolytica HM-1:IMSS OX=294381 GN=EHI_029930 PE=4 SV=1	B1N5K4	EHI_029930	16 kDa	0	0	0	0	0	0
Heat shock protein 70, putative OS=Entamoeba histolytica HM-1:IMSS OX=294381 GN=EHI_148990 PE=4 SV=1	C4LT65	EHI_148990	88 kDa	0	0	0	0	0	0
Leucine-rich repeat containing protein OS=Entamoeba histolytica HM-1:IMSS OX=294381 GN=EHI_073580 PE=3 SV=1	C4LXL8 (+1)	EHI_073580	56 kDa	0	0	0	0	0	0
DUF4832 domain-containing protein OS=Entamoeba histolytica HM-1:IMSS OX=294381 GN=EHI_119270 PE=4 SV=1	C4M4X6 (+2)	EHI_119270	52 kDa	0	0	0	0	0	0
Uncharacterized protein OS=Entamoeba histolytica HM-1:IMSS OX=294381 GN=EHI_035820 PE=4 SV=1	C4LY09 (+2)	EHI_035820	82 kDa	0	0	0	0	0	0
Purine nucleoside phosphorylase, putative OS=Entamoeba histolytica HM-1:IMSS OX=294381 GN=EHI_048740 PE=4 SV=1	C4M2Y7 (+2)	EHI_048740	35 kDa	0	0	0	0	0	0
OmpH family outer membrane protein OS=Entamoeba histolytica HM-1:IMSS OX=294381 GN=EHI_152800 PE=4 SV=1	C4LSW3 (+2)	EHI_152800	10 kDa	0	0	0	0	0	0
Thioredoxin domain-containing protein OS=Entamoeba histolytica HM-1:IMSS OX=294381 GN=EHI_072060 PE=4 SV=1	C4M611 (+2)	EHI_072060	58 kDa	0	0	0	0	0	0
Pumilio family RNA-binding protein OS=Entamoeba histolytica HM-1:IMSS OX=294381 GN=EHI_026330 PE=4 SV=1	C4M5U9	EHI_026330	62 kDa	0	0	0	0	0	0
Vesicle-associated membrane protein, putative OS=Entamoeba histolytica HM-1:IMSS OX=294381 GN=EHI_069370 PE=4 SV=1	A0A8U0WP07	EHI_069370	15 kDa	0	0	0	0	0	0
Serine/threonine-protein kinase TOR OS=Entamoeba histolytica HM-1:IMSS OX=294381 GN=EHI_169320 PE=3 SV=1	C4M249 (+2)	EHI_169320	270 kDa	0	0	0	0	0	0
Thioredoxin, putative OS=Entamoeba histolytica HM-1:IMSS OX=294381 GN=EHI_169240 PE=4 SV=1	C4M242 (+2)	EHI_169240	20 kDa	0	0	0	0	0	0
F_actin_bund_C domain-containing protein OS=Entamoeba histolytica HM-1:IMSS OX=294381 GN=EHI_010570 PE=4 SV=1	C4LYU4 (+2)	EHI_010570	33 kDa	0	0	0	0	0	0
Rab family GTPase OS=Entamoeba histolytica HM-1:IMSS OX=294381 GN=EHI_053420 PE=4 SV=1	A0A8U0WNW9 (+2)	EHI_053420	24 kDa	0	0	0	0	0.71637	0
Small nuclear ribonucleoprotein Sm D2 OS=Entamoeba histolytica HM-1:IMSS OX=294381 GN=EHI_108640 PE=3 SV=1	C4M843 (+2)	EHI_108640	12 kDa	0	0	0	0	0	0
WD domain containing protein OS=Entamoeba histolytica HM-1:IMSS OX=294381 GN=EHI_178860 PE=4 SV=1	C4LUV0 (+2)	EHI_178860	48 kDa	0	0	0	0	0	0
LIM zinc finger domain containing protein OS=Entamoeba histolytica HM-1:IMSS OX=294381 GN=EHI_004170 PE=4 SV=1	C4LYP1 (+2)	EHI_004170	19 kDa	0	0	0	0	0	0
Eukaryotic translation initiation factor eIF-5 OS=Entamoeba histolytica HM-1:IMSS OX=294381 GN=EHI_129770 PE=3 SV=1	C4M5Q8 (+2)	EHI_129770	41 kDa	0	0	0	0	0	0.63955
Polyadenylate-binding protein, putative OS=Entamoeba histolytica HM-1:IMSS OX=294381 GN=EHI_198750 PE=3 SV=1	C4LWS1 (+2)	EHI_198750	60 kDa	0	0	0	0	0	0
DH domain-containing protein OS=Entamoeba histolytica HM-1:IMSS OX=294381 GN=EHI_155540 PE=4 SV=1	C4LWA5 (+2)	EHI_155540	64 kDa	0	0	0	0	0	0
SSD domain-containing protein OS=Entamoeba histolytica HM-1:IMSS OX=294381 GN=EHI_083110 PE=4 SV=1	C4M755 (+2)	EHI_083110	61 kDa	0	0	0	0	0	0
Vacuolar protein sorting-associated protein OS=Entamoeba histolytica HM-1:IMSS OX=294381 GN=EHI_012580 PE=3 SV=1	C4LTP4 (+2)	EHI_012580	330 kDa	0	0	0	0	0	0
Rap/Ran GTPase-activating protein, putative OS=Entamoeba histolytica HM-1:IMSS OX=294381 GN=EHI_155710 PE=4 SV=1	C4LWC0 (+2)	EHI_155710	154 kDa	0	0	0	0	0	0
DNA-directed DNA polymerase OS=Entamoeba histolytica HM-1:IMSS OX=294381 GN=EHI_164190 PE=3 SV=1	B1N3D4	EHI_164190	150 kDa	0	0	0	0	0	0
Tetraspanin family protein OS=Entamoeba histolytica HM-1:IMSS OX=294381 GN=EHI_006930 PE=4 SV=1	C4M0G6 (+2)	EHI_006930	24 kDa	0	0	0	0	0	0
UBX domain-containing protein OS=Entamoeba histolytica HM-1:IMSS OX=294381 GN=EHI_114380 PE=4 SV=1	C4M8M1 (+2)	EHI_114380	48 kDa	0	0	0	0	0	0
Uncharacterized protein OS=Entamoeba histolytica HM-1:IMSS OX=294381 GN=EHI_013920 PE=4 SV=1	C4LXN4 (+2)	EHI_013920	12 kDa	0	0	0	0	0	0
RRM domain-containing protein OS=Entamoeba histolytica HM-1:IMSS OX=294381 GN=EHI_017030 PE=4 SV=1	C4MAK5 (+2)	EHI_017030	26 kDa	0	0	0	0	0	0
Uncharacterized protein OS=Entamoeba histolytica HM-1:IMSS OX=294381 GN=EHI_026470 PE=4 SV=1	C4M5W7 (+2)	EHI_026470	43 kDa	0	0	0	0	0	0.63955
Separase OS=Entamoeba histolytica HM-1:IMSS OX=294381 GN=EHI_120330 PE=4 SV=1	C4M8H8 (+1)	EHI_120330	172 kDa	0	0	0	0	0	0
S phingosine-1-phosphate lyase 1, putative OS=Entamoeba histolytica HM-1:IMSS OX=294381 GN=EHI_039350 PE=3 SV=1	C4M8C7 (+2)	EHI_039350	58 kDa	0	0	0	0	0	0
Longin-type vesicle-associated membrane protein, putative OS=Entamoeba histolytica HM-1:IMSS OX=294381 GN=EHI_022910 PE=4 SV=1	A0A8U0WPV6 (+1)	EHI_022910	26 kDa	0	0	0	0	0	0
RRM domain-containing protein OS=Entamoeba histolytica HM-1:IMSS OX=294381 GN=EHI_044920 PE=4 SV=1	C4LTB1 (+2)	EHI_044920	37 kDa	0	0	0	0	0	0

## Sheet: Trial 2
Table S3. E. histolytica HA-KERP2 co-IP proteome
Trial 2
Identified Proteins (1080)	Accession Number	Alternate ID	Molecular Weight	HAKERP2-cytosol (2A)	HAKERP2∆185−239-cytosol (2B)	HAmock-cytosol (2C)	HAKERP2-nucleus (2D)	HAKERP2∆185−239 -nucleus (2E)	HAmock-nucleus (2F)
Myosin heavy chain OS=Entamoeba histolytica HM-1:IMSS OX=294381 GN=EHI_110180 PE=3 SV=1	C4LU72 (+2)	EHI_110180	247 kDa	39.147	49.649	48.636	39.695	22.009	13.09
Actin OS=Entamoeba histolytica HM-1:IMSS OX=294381 GN=EHI_107290 PE=3 SV=1	B1N2P0	EHI_107290	42 kDa	78.294	67.381	51.676	13.232	8.2535	7.8542
Nuclear pore protein, putative OS=Entamoeba histolytica HM-1:IMSS OX=294381 GN=EHI_183510 PE=3 SV=1	C4M730 (+2)	EHI_183510	186 kDa	0	0	0	6.6159	14.673	11.968
Interaptin, putative OS=Entamoeba histolytica HM-1:IMSS OX=294381 GN=EHI_148910 PE=4 SV=1	C4LT58 (+2)	EHI_148910	135 kDa	0	0	0	5.5132	6.8779	8.9762
Myosin heavy chain OS=Entamoeba histolytica HM-1:IMSS OX=294381 GN=EHI_140720 PE=4 SV=1	C4M3P4 (+2)	EHI_140720	152 kDa	0	0	0	12.129	12.38	4.8621
Aldehyde-alcohol dehydrogenase OS=Entamoeba histolytica HM-1:IMSS OX=294381 GN=EHI_150490 PE=3 SV=1	C4M230 (+1)	EHI_150490	96 kDa	30.448	35.464	27.358	4.9619	4.1267	2.6181
Axoneme-associated protein mst101 OS=Entamoeba histolytica HM-1:IMSS OX=294381 GN=EHI_160980 PE=4 SV=1	C4M2R6 (+2)	EHI_160980	34 kDa	17.399	10.639	15.199	3.3079	8.2535	2.2441
Pyruvate phosphate dikinase OS=Entamoeba histolytica HM-1:IMSS OX=294381 GN=EHI_009530 PE=4 SV=1	A0A8U0WP38 (+2)	EHI_009530	98 kDa	30.448	31.917	30.397	3.3079	4.1267	3.3661
DUF4200 domain-containing protein OS=Entamoeba histolytica HM-1:IMSS OX=294381 GN=EHI_008020 PE=4 SV=1	C4LYD8 (+2)	EHI_008020	99 kDa	0	0	0	4.9619	5.9609	7.1062
Galactose-specific adhesin 170kD subunit OS=Entamoeba histolytica HM-1:IMSS OX=294381 GN=EHI_077500 PE=4 SV=1	C4M8N3	EHI_077500	145 kDa	0	0	0	6.0646	5.0438	6.7322
Peroxiredoxin, putative OS=Entamoeba histolytica HM-1:IMSS OX=294381 GN=EHI_122310 PE=3 SV=1	C4MBP3	EHI_122310	27 kDa	21.748	17.732	21.278	1.1026	2.2926	1.496
Clathrin heavy chain OS=Entamoeba histolytica HM-1:IMSS-B OX=885319 GN=EHI8A_063050 PE=3 SV=1	M3TXX7 (+1)	EHI8A_063050	193 kDa	0	7.0927	12.159	6.6159	5.0438	5.6102
Serine-threonine rich protein OS=Entamoeba histolytica HM-1:IMSS OX=294381 GN=EHI_095870 PE=4 SV=1	C4M3E4 (+2)	EHI_095870	104 kDa	0	0	0	8.2699	8.2535	8.6022
Adenylyl cyclase-associated protein OS=Entamoeba histolytica HM-1:IMSS OX=294381 GN=EHI_136150 PE=3 SV=1	C4M295	EHI_136150	53 kDa	0	7.0927	6.0795	3.8593	3.6682	3.7401
Heat shock protein 70, putative OS=Entamoeba histolytica HM-1:IMSS OX=294381 GN=EHI_052860 PE=3 SV=1	C4M3S5	EHI_052860	72 kDa	17.399	24.825	6.0795	3.8593	4.5853	2.6181
Gal/GalNAc lectin heavy subunit OS=Entamoeba histolytica HM-1:IMSS OX=294381 GN=EHI_012270 PE=4 SV=1	C4LTM0	EHI_012270	144 kDa	0	0	0	5.5132	4.5853	4.1141
Elongation factor 1-alpha OS=Entamoeba histolytica HM-1:IMSS OX=294381 GN=EHI_052400 PE=2 SV=1	C4MAC9	EHI_052400	48 kDa	30.448	24.825	0	0	0	0
Elongation factor 1-alpha OS=Entamoeba histolytica HM-1:IMSS OX=294381 GN=EHI_011210 PE=3 SV=1	C4M7D4	EHI_011210	48 kDa	30.448	17.732	12.159	1.1026	2.7512	0.74802
Protein serine/threonine kinase OS=Entamoeba histolytica HM-1:IMSS OX=294381 GN=EHI_098510 PE=4 SV=1	C4LXD1	EHI_098510	188 kDa	0	0	0	1.654	5.9609	4.8621
GRIP domain-containing protein OS=Entamoeba histolytica HM-1:IMSS OX=294381 GN=EHI_152940 PE=4 SV=1	C4LS87 (+2)	EHI_152940	124 kDa	0	0	0	5.5132	5.0438	7.8542
Serine-threonine-isoleucine rich protein, putative OS=Entamoeba histolytica HM-1:IMSS OX=294381 GN=EHI_012330 PE=4 SV=1	C4LTM6	EHI_012330	291 kDa	0	0	0	3.8593	8.2535	4.4881
Epsin-2 OS=Entamoeba histolytica HM-1:IMSS OX=294381 GN=EHI_145610 PE=4 SV=1	B1N3Z3	EHI_145610	80 kDa	0	0	0	4.9619	4.1267	6.7322
Serine-threonine-isoleucine rich protein, putative OS=Entamoeba histolytica HM-1:IMSS OX=294381 GN=EHI_025700 PE=4 SV=1	C4MAX8	EHI_025700	288 kDa	0	0	0	3.8593	7.795	4.4881
Galactose-specific adhesin 170kD subunit, putative OS=Entamoeba histolytica HM-1:IMSS OX=294381 GN=EHI_042370 PE=4 SV=1	B1N559	EHI_042370	143 kDa	0	0	0	0	0	0
Glutamic acid-rich protein, putative OS=Entamoeba histolytica HM-1:IMSS OX=294381 GN=EHI_082590 PE=4 SV=1	C4M6A8	EHI_082590	121 kDa	0	0	0	5.5132	5.5023	5.2361
Uncharacterized protein OS=Entamoeba histolytica HM-1:IMSS OX=294381 GN=EHI_145970 PE=4 SV=1	C4M3Q2	EHI_145970	166 kDa	0	0	0	6.0646	3.2097	6.3582
70 kDa heat shock protein, putative OS=Entamoeba histolytica HM-1:IMSS OX=294381 GN=EHI_199590 PE=3 SV=1	C4M770 (+2)	EHI_199590	73 kDa	0	3.5464	6.0795	4.9619	2.7512	0.37401
Galactose-inhibitable lectin 35 kDa subunit OS=Entamoeba histolytica HM-1:IMSS OX=294381 GN=EHI_035690 PE=4 SV=1	C4LXZ9 (+1)	EHI_035690	34 kDa	0	0	0	4.4106	5.9609	7.4802
Gal/GalNAc lectin light subunit OS=Entamoeba histolytica HM-1:IMSS OX=294381 GN=EHI_148790 PE=4 SV=1	C4LT47 (+2)	EHI_148790	32 kDa	0	0	3.0397	7.7185	5.9609	6.3582
Galactose-specific adhesin light subunit, putative OS=Entamoeba histolytica HM-1:IMSS OX=294381 GN=EHI_049690 PE=4 SV=1	B1N2L3 (+1)	EHI_049690	34 kDa	0	0	0	2.7566	4.5853	7.4802
DNA topoisomerase II, putative OS=Entamoeba histolytica HM-1:IMSS OX=294381 GN=EHI_120640 PE=4 SV=1	A0A8U0WPS2 (+2)	EHI_120640	155 kDa	0	0	0	2.2053	5.5023	3.3661
PIWI, putative OS=Entamoeba histolytica HM-1:IMSS OX=294381 GN=EHI_125650 PE=3 SV=1	C4LVV2 (+1)	EHI_125650	110 kDa	26.098	14.185	27.358	0.55132	1.3756	1.496
Pyruvate:ferredoxin oxidoreductase OS=Entamoeba histolytica HM-1:IMSS OX=294381 GN=EHI_051060 PE=4 SV=1	C4LTX6 (+1)	EHI_051060	128 kDa	26.098	14.185	24.318	1.654	3.2097	0.37401
Unconventional myosin IB OS=Entamoeba histolytica HM-1:IMSS OX=294381 GN=EHI_110810 PE=1 SV=1	C4LUC7 (+2)	EHI_110810	119 kDa	0	3.5464	6.0795	4.4106	2.2926	3.7401
TNase-like domain-containing protein OS=Entamoeba histolytica HM-1:IMSS OX=294381 GN=EHI_005150 PE=4 SV=1	C4M0A8 (+2)	EHI_005150	99 kDa	4.3497	3.5464	0	2.7566	2.7512	1.496
EF-hand calcium-binding domain containing protein OS=Entamoeba histolytica HM-1:IMSS OX=294381 GN=EHI_060740 PE=1 SV=1	C4MBE2 (+2)	EHI_060740	27 kDa	0	7.0927	3.0397	3.3079	3.6682	3.3661
Uncharacterized protein OS=Entamoeba histolytica HM-1:IMSS OX=294381 GN=EHI_169970 PE=4 SV=1	C4M1B9 (+2)	EHI_169970	43 kDa	0	0	0	2.2053	4.1267	3.3661
40S ribosomal protein S2, putative OS=Entamoeba histolytica HM-1:IMSS OX=294381 GN=EHI_020280 PE=3 SV=1	C4M7U0 (+2)	EHI_020280	28 kDa	4.3497	10.639	9.1192	3.3079	2.7512	1.8701
GRIP domain-containing protein OS=Entamoeba histolytica HM-1:IMSS OX=294381 GN=EHI_131060 PE=4 SV=1	C4LXH4 (+2)	EHI_131060	64 kDa	0	0	0	4.4106	5.0438	5.9842
Serine-threonine-isoleucine rich protein, putative OS=Entamoeba histolytica HM-1:IMSS OX=294381 GN=EHI_004340 PE=4 SV=1	B1N330	EHI_004340	260 kDa	0	0	0	2.7566	6.4194	3.7401
Glyceraldehyde-3-phosphate dehydrogenase OS=Entamoeba histolytica HM-1:IMSS OX=294381 GN=EHI_008200 PE=3 SV=1	C4LVR9	EHI_008200	36 kDa	17.399	10.639	3.0397	1.1026	4.1267	0.74802
Uncharacterized protein OS=Entamoeba histolytica HM-1:IMSS OX=294381 GN=EHI_177420 PE=4 SV=1	C4LY45	EHI_177420	53 kDa	0	0	0	3.8593	4.1267	4.8621
Actin-like protein, putative OS=Entamoeba histolytica HM-1:IMSS OX=294381 GN=EHI_111050 PE=3 SV=1	C4M5I6 (+2)	EHI_111050	45 kDa	0	0	0	2.7566	2.7512	2.6181
Galactose-inhibitable lectin, putative OS=Entamoeba histolytica HM-1:IMSS OX=294381 GN=EHI_058330 PE=4 SV=1	C4M5G9 (+2)	EHI_058330	32 kDa	0	0	0	0	4.5853	6.7322
RanBD1 domain-containing protein OS=Entamoeba histolytica HM-1:IMSS OX=294381 GN=EHI_085060 PE=4 SV=1	C4M1L6 (+2)	EHI_085060	77 kDa	0	0	0	4.4106	4.5853	4.4881
NAD(P) transhydrogenase subunit alpha, putative OS=Entamoeba histolytica HM-1:IMSS OX=294381 GN=EHI_014030 PE=4 SV=1	A0A8U0WPM4	EHI_014030	118 kDa	0	0	3.0397	4.4106	5.0438	5.6102
Dot/Icm system substrate protein LidA OS=Entamoeba histolytica HM-1:IMSS OX=294381 GN=EHI_083620 PE=4 SV=1	C4M946 (+2)	EHI_083620	185 kDa	0	0	0	3.3079	2.2926	2.6181
60S ribosomal protein L7a OS=Entamoeba histolytica HM-1:IMSS OX=294381 GN=EHI_029530 PE=3 SV=1	B1N3R9 (+1)	EHI_029530	32 kDa	4.3497	7.0927	3.0397	2.2053	0.91705	2.2441
DNA double-strand break repair Rad50 ATPase OS=Entamoeba histolytica HM-1:IMSS OX=294381 GN=EHI_022130 PE=4 SV=1	C4MAT9 (+2)	EHI_022130	71 kDa	0	0	0	4.4106	3.2097	1.8701
G protein alpha subunit, putative OS=Entamoeba histolytica HM-1:IMSS OX=294381 GN=EHI_140350 PE=1 SV=1	C4M483 (+2)	EHI_140350	40 kDa	0	0	0	7.7185	5.0438	4.1141
Leucine rich repeats family protein OS=Entamoeba histolytica HM-1:IMSS OX=294381 GN=EHI_140310 PE=4 SV=1	C4M479 (+2)	EHI_140310	76 kDa	0	0	0	1.654	2.2926	4.1141
40S ribosomal protein SA OS=Entamoeba histolytica HM-1:IMSS OX=294381 GN=EHI_081410 PE=3 SV=1	C4M5A0 (+2)	EHI_081410	29 kDa	30.448	14.185	18.238	3.3079	3.2097	1.122
CNH domain-containing protein OS=Entamoeba histolytica HM-1:IMSS OX=294381 GN=EHI_035980 PE=4 SV=1	C4M7F7 (+2)	EHI_035980	103 kDa	0	0	0	3.8593	4.1267	4.4881
Grainin 1 OS=Entamoeba histolytica HM-1:IMSS OX=294381 GN=EHI_167300 PE=4 SV=1	C4MAF9 (+2)	EHI_167300	24 kDa	4.3497	0	9.1192	3.8593	1.3756	1.8701
Actin-related protein 2/3 complex subunit OS=Entamoeba histolytica HM-1:IMSS OX=294381 GN=EHI_045000 PE=3 SV=1	C4LTB5 (+1)	EHI_045000	40 kDa	4.3497	7.0927	6.0795	2.7566	1.8341	3.3661
Saposin B-type domain-containing protein OS=Entamoeba histolytica HM-1:IMSS OX=294381 GN=EHI_096370 PE=4 SV=1	C4LWF0 (+2)	EHI_096370	115 kDa	0	0	0	2.7566	1.8341	1.496
Grainin 2 OS=Entamoeba histolytica HM-1:IMSS OX=294381 GN=EHI_167310 PE=4 SV=1	A0A8U0WPU5 (+2)	EHI_167310	24 kDa	0	0	12.159	2.7566	1.8341	3.3661
40S ribosomal protein S6 OS=Entamoeba histolytica HM-1:IMSS OX=294381 GN=EHI_013890 PE=3 SV=1	C4LXN2	EHI_013890	30 kDa	0	3.5464	0	3.3079	1.8341	2.2441
60S ribosomal protein L4, putative OS=Entamoeba histolytica HM-1:IMSS OX=294381 GN=EHI_000510 PE=3 SV=1	C4LZA2	EHI_000510	47 kDa	8.6994	10.639	6.0795	1.654	0.91705	1.122
4-alpha-glucanotransferase OS=Entamoeba histolytica HM-1:IMSS OX=294381 GN=EHI_148560 PE=3 SV=1	C4LT26 (+2)	EHI_148560	103 kDa	0	0	0	1.654	3.2097	2.9921
40S ribosomal protein S3a OS=Entamoeba histolytica HM-1:IMSS OX=294381 GN=EHI_065270 PE=3 SV=1	C4M609	EHI_065270	29 kDa	4.3497	0	9.1192	3.3079	1.3756	1.8701
DNA double-strand break repair Rad50 ATPase OS=Entamoeba histolytica HM-1:IMSS OX=294381 GN=EHI_194550 PE=4 SV=1	C4LZW6	EHI_194550	40 kDa	0	0	0	1.654	1.8341	1.496
Actinin-like protein, putative OS=Entamoeba histolytica HM-1:IMSS OX=294381 GN=EHI_164430 PE=4 SV=1	C4M1S5 (+1)	EHI_164430	54 kDa	4.3497	0	6.0795	1.654	1.8341	1.8701
Nucleolar protein Nop56, putative OS=Entamoeba histolytica HM-1:IMSS OX=294381 GN=EHI_122740 PE=3 SV=1	C4M5N2 (+2)	EHI_122740	52 kDa	4.3497	0	3.0397	2.2053	2.2926	5.2361
Phosphopyruvate hydratase OS=Entamoeba histolytica HM-1:IMSS OX=294381 GN=EHI_130700 PE=3 SV=1	C4LXE8 (+2)	EHI_130700	47 kDa	17.399	21.278	15.199	2.2053	4.5853	2.2441
Helicase C-terminal domain-containing protein OS=Entamoeba histolytica HM-1:IMSS OX=294381 GN=EHI_031370 PE=4 SV=1	C4M4L4 (+2)	EHI_031370	118 kDa	0	0	0	2.7566	1.8341	2.9921
60S ribosomal protein L3, putative OS=Entamoeba histolytica HM-1:IMSS OX=294381 GN=EHI_005890 PE=3 SV=1	C4LW09	EHI_005890	46 kDa	4.3497	3.5464	9.1192	0	0.91705	0.37401
Uncharacterized protein OS=Entamoeba histolytica HM-1:IMSS OX=294381 GN=EHI_146110 PE=4 SV=1	C4M3Q5 (+2)	EHI_146110	43 kDa	0	0	0	4.4106	5.5023	2.6181
40S ribosomal protein S7 OS=Entamoeba histolytica HM-1:IMSS OX=294381 GN=EHI_067530 PE=3 SV=1	C4M9F9 (+2)	EHI_067530	22 kDa	13.049	3.5464	6.0795	1.1026	0.91705	0
Heat shock protein 70, putative OS=Entamoeba histolytica HM-1:IMSS OX=294381 GN=EHI_188610 PE=3 SV=1	B1N486 (+1)	EHI_188610	71 kDa	0	0	0	2.7566	0	0
DNA double-strand break repair Rad50 ATPase OS=Entamoeba histolytica HM-1:IMSS OX=294381 GN=EHI_188170 PE=4 SV=1	C4M191	EHI_188170	36 kDa	0	0	0	2.7566	2.2926	2.2441
40S ribosomal protein S8 OS=Entamoeba histolytica HM-1:IMSS OX=294381 GN=EHI_009870 PE=3 SV=1	C4M0Q2	EHI_009870	27 kDa	0	3.5464	3.0397	1.654	1.8341	2.6181
Fructose-1,6-bisphosphate aldolase, putative OS=Entamoeba histolytica HM-1:IMSS OX=294381 GN=EHI_098570 PE=4 SV=1	C4LXD7	EHI_098570	36 kDa	13.049	10.639	15.199	1.1026	0.91705	1.496
DNA-directed RNA polymerase subunit OS=Entamoeba histolytica HM-1:IMSS-B OX=885319 GN=EHI8A_079580 PE=3 SV=1	M3TGJ8	EHI8A_079580	178 kDa	0	0	0	1.1026	0.91705	3.3661
BRCT domain-containing protein OS=Entamoeba histolytica HM-1:IMSS OX=294381 GN=EHI_004350 PE=4 SV=1	C4LYP8 (+2)	EHI_004350	63 kDa	0	0	0	1.654	3.6682	2.2441
E3 ubiquitin protein ligase OS=Entamoeba histolytica HM-1:IMSS OX=294381 GN=EHI_059690 PE=4 SV=1	C4M339 (+2)	EHI_059690	106 kDa	0	0	0	0.55132	0.91705	4.1141
Nuclease OS=Entamoeba histolytica HM-1:IMSS OX=294381 GN=EHI_101240 PE=4 SV=1	C4M8B5 (+2)	EHI_101240	96 kDa	0	0	0	2.7566	1.8341	0.74802
40S ribosomal protein S3a OS=Entamoeba histolytica HM-1:IMSS OX=294381 GN=EHI_050280 PE=3 SV=1	C4LTQ5	EHI_050280	29 kDa	0	0	0	0	0	0
14-3-3 protein 2 OS=Entamoeba histolytica HM-1:IMSS OX=294381 GN=EHI_098280 PE=3 SV=1	C4LXB1 (+2)	EHI_098280	28 kDa	4.3497	3.5464	9.1192	1.1026	1.3756	0.37401
V-type ATPase, B subunit, putative OS=Entamoeba histolytica HM-1:IMSS OX=294381 GN=EHI_189850 PE=3 SV=1	A0A8U0WP39 (+2)	EHI_189850	55 kDa	0	0	0	3.8593	4.1267	3.3661
Acetyl-CoA synthetase, putative OS=Entamoeba histolytica HM-1:IMSS OX=294381 GN=EHI_178960 PE=4 SV=1	C4LUV9 (+2)	EHI_178960	77 kDa	4.3497	7.0927	6.0795	1.654	2.2926	0
Calmodulin, putative OS=Entamoeba histolytica HM-1:IMSS OX=294381 GN=EHI_023500 PE=4 SV=1	C4LUQ9 (+2)	EHI_023500	17 kDa	4.3497	3.5464	6.0795	4.4106	1.8341	1.122
40S ribosomal protein S4, putative OS=Entamoeba histolytica HM-1:IMSS OX=294381 GN=EHI_118170 PE=3 SV=1	B1N336 (+1)	EHI_118170	36 kDa	0	0	6.0795	2.2053	0.91705	1.496
60S ribosomal protein L9, putative OS=Entamoeba histolytica HM-1:IMSS OX=294381 GN=EHI_126140 PE=3 SV=1	C4LVZ9	EHI_126140	22 kDa	8.6994	3.5464	6.0795	1.1026	1.8341	1.496
BRO1 domain-containing protein OS=Entamoeba histolytica HM-1:IMSS OX=294381 GN=EHI_167710 PE=4 SV=1	C4M7Z2 (+2)	EHI_167710	104 kDa	0	0	0	3.3079	2.7512	1.8701
Villidin, putative OS=Entamoeba histolytica HM-1:IMSS OX=294381 GN=EHI_021270 PE=4 SV=1	C4M042 (+2)	EHI_021270	170 kDa	0	0	0	2.2053	1.8341	2.9921
60S ribosomal protein L27 OS=Entamoeba histolytica HM-1:IMSS OX=294381 GN=EHI_183480 PE=3 SV=1	C4M727 (+2)	EHI_183480	16 kDa	17.399	14.185	0	1.654	1.8341	1.496
KERP2-1-164 Truncated DEK_C domain-containing protein OS=Entamoeba histolytica HM-1:IMSS OX=294381 GN=EHI_065630 PE=4 SV=1	1C4LZX9 (+3)	EHI_065630	21 kDa	21.748	21.278	0	3.3079	2.2926	0.74802
Nucleosome assembly protein, putative OS=Entamoeba histolytica HM-1:IMSS OX=294381 GN=EHI_072030 PE=3 SV=1	C4M608 (+2)	EHI_072030	28 kDa	21.748	21.278	24.318	0	0	0
60S ribosomal protein L5, putative OS=Entamoeba histolytica HM-1:IMSS OX=294381 GN=EHI_006860 PE=3 SV=1	C4LU56	EHI_006860	32 kDa	8.6994	3.5464	9.1192	1.1026	1.8341	1.8701
Plastin-2, putative OS=Entamoeba histolytica HM-1:IMSS-B OX=885319 GN=EHI8A_186020 PE=4 SV=1	M3TGQ4	EHI8A_186020	111 kDa	0	0	0	3.3079	3.6682	0
Gal/GalNAc lectin subunit Igl2 OS=Entamoeba histolytica HM-1:IMSS OX=294381 GN=EHI_065330 PE=4 SV=1	C4M6L0	EHI_065330	120 kDa	0	0	3.0397	2.2053	1.3756	2.9921
Fibrillarin, putative OS=Entamoeba histolytica HM-1:IMSS OX=294381 GN=EHI_118840 PE=3 SV=1	C4LYN2 (+2)	EHI_118840	32 kDa	0	0	3.0397	1.654	0.45853	2.2441
ELMO domain-containing protein OS=Entamoeba histolytica HM-1:IMSS OX=294381 GN=EHI_098830 PE=4 SV=1	C4M876 (+2)	EHI_098830	161 kDa	0	0	0	1.1026	1.8341	1.496
FHA domain-containing protein OS=Entamoeba histolytica HM-1:IMSS OX=294381 GN=EHI_129340 PE=4 SV=1	C4M9W7 (+1)	EHI_129340	65 kDa	0	0	0	1.1026	2.7512	2.9921
Fimbrin OS=Entamoeba histolytica HM-1:IMSS OX=294381 GN=EHI_154330 PE=4 SV=1	C4M596 (+1)	EHI_154330	111 kDa	0	0	0	3.3079	3.6682	0.74802
40S ribosomal protein S3, putative OS=Entamoeba histolytica HM-1:IMSS OX=294381 GN=EHI_146340 PE=3 SV=1	C4LT02	EHI_146340	27 kDa	8.6994	7.0927	6.0795	0.55132	0.91705	0.74802
Actin-related protein 2/3 complex subunit 4 OS=Entamoeba histolytica HM-1:IMSS OX=294381 GN=EHI_030820 PE=3 SV=1	C4LSV0	EHI_030820	22 kDa	0	0	3.0397	3.3079	1.8341	1.8701
Uncharacterized protein OS=Entamoeba histolytica HM-1:IMSS OX=294381 GN=EHI_175270 PE=4 SV=1	C4M3A6 (+2)	EHI_175270	50 kDa	0	0	0	1.1026	1.3756	1.122
40S ribosomal protein S17, putative OS=Entamoeba histolytica HM-1:IMSS OX=294381 GN=EHI_135060 PE=3 SV=1	C4M0Z2 (+2)	EHI_135060	14 kDa	17.399	10.639	12.159	0.55132	1.3756	0.74802
Alpha-1,4 glucan phosphorylase OS=Entamoeba histolytica HM-1:IMSS OX=294381 GN=EHI_096830 PE=3 SV=1	C4LWJ2 (+1)	EHI_096830	102 kDa	0	0	0	1.1026	0.45853	1.496
Ras family GTPase OS=Entamoeba histolytica HM-1:IMSS OX=294381 GN=EHI_058090 PE=3 SV=1	C4M8B0 (+2)	EHI_058090	21 kDa	4.3497	3.5464	0	2.2053	2.7512	1.496
Alcohol dehydrogenase, putative OS=Entamoeba histolytica HM-1:IMSS OX=294381 GN=EHI_198760 PE=3 SV=1	C4LWS2 (+1)	EHI_198760	43 kDa	4.3497	3.5464	6.0795	2.2053	0.91705	0.37401
Calmodulin, putative OS=Entamoeba histolytica HM-1:IMSS OX=294381 GN=EHI_148890 PE=4 SV=1	C4LT56 (+1)	EHI_148890	17 kDa	0	3.5464	0	2.2053	1.8341	1.122
Actin, putative OS=Entamoeba histolytica HM-1:IMSS OX=294381 GN=EHI_008780 PE=3 SV=1	C4M0P2 (+2)	EHI_008780	85 kDa	0	0	0	2.7566	1.8341	2.2441
60S ribosomal protein L18a OS=Entamoeba histolytica HM-1:IMSS OX=294381 GN=EHI_035600 PE=3 SV=1	C4LXZ0	EHI_035600	20 kDa	0	0	3.0397	2.7566	2.2926	1.8701
rRNA biogenesis protein RRP5, putative OS=Entamoeba histolytica HM-1:IMSS OX=294381 GN=EHI_077270 PE=4 SV=1	C4M2T6	EHI_077270	198 kDa	0	0	0	0	1.3756	2.6181
Uncharacterized protein OS=Entamoeba histolytica HM-1:IMSS OX=294381 GN=EHI_190870 PE=4 SV=1	C4M9U9 (+2)	EHI_190870	47 kDa	0	0	0	3.3079	0.91705	3.7401
14-3-3 protein 3 OS=Entamoeba histolytica HM-1:IMSS OX=294381 GN=EHI_006810 PE=3 SV=1	C4M0F4 (+2)	EHI_006810	28 kDa	0	0	0	0	0.91705	0.74802
SnoRNA binding protein, putative OS=Entamoeba histolytica HM-1:IMSS OX=294381 GN=EHI_183900 PE=3 SV=1	C4MAW3 (+1)	EHI_183900	57 kDa	0	0	0	2.7566	1.3756	2.9921
Immuno-dominant variable surface antigen OS=Entamoeba histolytica HM-1:IMSS OX=294381 GN=EHI_015380 PE=4 SV=1	C4M0X6 (+2)	EHI_015380	125 kDa	0	0	0	3.3079	2.7512	3.3661
F-actin-capping protein subunit alpha OS=Entamoeba histolytica HM-1:IMSS OX=294381 GN=EHI_033740 PE=3 SV=1	C4M3N6	EHI_033740	31 kDa	0	0	0	1.654	1.8341	0.74802
60S ribosomal protein L6, putative OS=Entamoeba histolytica HM-1:IMSS OX=294381 GN=EHI_045300 PE=3 SV=1	C4LTE3	EHI_045300	23 kDa	4.3497	0	6.0795	1.1026	1.3756	1.496
Type A flavoprotein, putative OS=Entamoeba histolytica HM-1:IMSS OX=294381 GN=EHI_096710 PE=4 SV=1	B1N2F9 (+1)	EHI_096710	46 kDa	0	7.0927	0	2.2053	1.3756	0.37401
40S ribosomal protein S9, putative OS=Entamoeba histolytica HM-1:IMSS OX=294381 GN=EHI_179000 PE=3 SV=1	C4LUW3	EHI_179000	21 kDa	0	0	0	0	0.45853	1.122
Ubiquitin, putative OS=Entamoeba histolytica HM-1:IMSS OX=294381 GN=EHI_083270 PE=1 SV=1	C4M760 (+2)	EHI_083270	9 kDa	0	7.0927	0	2.7566	2.2926	0.74802
Skp1 protein, putative OS=Entamoeba histolytica HM-1:IMSS OX=294381 GN=EHI_066770 PE=3 SV=1	C4M261	EHI_066770	18 kDa	0	0	0	1.1026	1.3756	1.122
Calponin homology domain protein, putative OS=Entamoeba histolytica HM-1:IMSS OX=294381 GN=EHI_199000 PE=1 SV=1	C4LWU6 (+2)	EHI_199000	70 kDa	0	3.5464	0	1.1026	2.2926	0.74802
Axoneme-associated protein mst101 OS=Entamoeba histolytica HM-1:IMSS OX=294381 GN=EHI_110740 PE=4 SV=1	C4LUC1 (+2)	EHI_110740	95 kDa	0	0	0	1.654	1.3756	0.74802
Protein kinase domain containing protein OS=Entamoeba histolytica HM-1:IMSS OX=294381 GN=EHI_118810 PE=4 SV=1	C4LYM9	EHI_118810	122 kDa	0	0	0	0.55132	2.7512	0.74802
60S ribosomal protein L11, putative OS=Entamoeba histolytica HM-1:IMSS OX=294381 GN=EHI_124300 PE=3 SV=1	C4LZG9 (+2)	EHI_124300	20 kDa	8.6994	0	6.0795	1.654	1.8341	2.2441
Rab family GTPase OS=Entamoeba histolytica HM-1:IMSS OX=294381 GN=EHI_143650 PE=4 SV=1	A0A8U0WP91 (+2)	EHI_143650	23 kDa	8.6994	7.0927	3.0397	2.7566	0.91705	0.74802
Uncharacterized protein OS=Entamoeba histolytica HM-1:IMSS OX=294381 GN=EHI_126950 PE=4 SV=1	C4LWX1 (+1)	EHI_126950	40 kDa	0	0	0	1.654	2.7512	0.74802
Importin N-terminal domain-containing protein OS=Entamoeba histolytica HM-1:IMSS OX=294381 GN=EHI_171760 PE=4 SV=1	C4MAH1	EHI_171760	93 kDa	0	0	0	1.1026	0.45853	1.122
Filamin 2, putative OS=Entamoeba histolytica HM-1:IMSS OX=294381 GN=EHI_104630 PE=4 SV=1	C4LZ72 (+2)	EHI_104630	95 kDa	4.3497	7.0927	3.0397	0.55132	0.91705	1.496
Nucleoporin OS=Entamoeba histolytica HM-1:IMSS OX=294381 GN=EHI_110160 PE=4 SV=1	C4LU70 (+2)	EHI_110160	54 kDa	0	0	0	2.2053	2.7512	2.2441
Elongation factor 2 OS=Entamoeba histolytica HM-1:IMSS OX=294381 GN=EHI_166810 PE=3 SV=1	B1N306 (+2)	EHI_166810	97 kDa	0	7.0927	0	1.1026	1.3756	0
DNA double-strand break repair Rad50 ATPase OS=Entamoeba histolytica HM-1:IMSS OX=294381 GN=EHI_133530 PE=4 SV=1	C4M1L7 (+2)	EHI_133530	72 kDa	0	0	0	0	0.91705	0
Small GTPase Rab7A OS=Entamoeba histolytica HM-1:IMSS OX=294381 GN=EHI_192810 PE=4 SV=1	A0A8U0WPK6 (+2)	EHI_192810	23 kDa	0	0	0	1.654	1.3756	1.8701
40S ribosomal protein S7 OS=Entamoeba histolytica HM-1:IMSS OX=294381 GN=EHI_140540 PE=3 SV=1	B1N3K9 (+2)	EHI_140540	22 kDa	0	0	0	0	0	0
Histone H4 OS=Entamoeba histolytica HM-1:IMSS OX=294381 GN=EHI_023230 PE=3 SV=1	C4LUN4 (+2)	EHI_023230	13 kDa	0	0	0	1.654	2.7512	2.2441
DUF4142 domain-containing protein OS=Entamoeba histolytica HM-1:IMSS OX=294381 GN=EHI_095180 PE=4 SV=1	C4M4T0 (+2)	EHI_095180	34 kDa	0	0	0	2.2053	1.3756	0.37401
Secreted protein OS=Entamoeba histolytica HM-1:IMSS OX=294381 GN=EHI_109920 PE=4 SV=1	C4M3L1 (+2)	EHI_109920	53 kDa	0	0	0	1.1026	1.3756	1.122
Chaperonin 1 60 kDa OS=Entamoeba histolytica HM-1:IMSS OX=294381 GN=EHI_178570 PE=4 SV=1	A0A8U0WP12 (+2)	EHI_178570	57 kDa	0	3.5464	21.278	1.1026	0.91705	0.37401
V-type ATPase, A subunit, putative OS=Entamoeba histolytica HM-1:IMSS OX=294381 GN=EHI_043010 PE=3 SV=1	A0A8U0WNY3 (+2)	EHI_043010	67 kDa	0	0	0	3.8593	1.3756	1.496
Actinin-like protein, putative OS=Entamoeba histolytica HM-1:IMSS OX=294381 GN=EHI_155290 PE=4 SV=1	C4LW82 (+1)	EHI_155290	58 kDa	0	0	0	1.654	0.91705	1.496
Arp2/3 complex 34 kDa subunit OS=Entamoeba histolytica HM-1:IMSS OX=294381 GN=EHI_091250 PE=3 SV=1	C4M782	EHI_091250	34 kDa	0	0	0	0	0.45853	0.74802
UNC45-central domain-containing protein OS=Entamoeba histolytica HM-1:IMSS OX=294381 GN=EHI_068510 PE=4 SV=1	C4LU42 (+2)	EHI_068510	83 kDa	0	3.5464	0	2.2053	1.3756	1.122
Uncharacterized protein OS=Entamoeba histolytica HM-1:IMSS OX=294381 GN=EHI_137110 PE=4 SV=1	C4M5Y9	EHI_137110	30 kDa	0	0	0	2.2053	2.7512	2.9921
Alpha-1,4 glucan phosphorylase (Fragment) OS=Entamoeba histolytica HM-1:IMSS-A OX=885318 GN=EHI7A_165570 PE=3 SV=1	N9TNP8	EHI7A_165570	97 kDa	0	0	0	1.654	1.3756	1.8701
SNF7 family protein OS=Entamoeba histolytica HM-1:IMSS OX=294381 GN=EHI_194400 PE=4 SV=1	C4LZV3 (+2)	EHI_194400	28 kDa	0	0	0	1.654	2.2926	1.8701
NTF2 domain-containing protein OS=Entamoeba histolytica HM-1:IMSS OX=294381 GN=EHI_035490 PE=3 SV=1	C4LXY0 (+2)	EHI_035490	61 kDa	0	0	0	2.7566	2.2926	1.8701
Protein PXR1-like OS=Entamoeba histolytica HM-1:IMSS OX=294381 GN=EHI_040340 PE=4 SV=1	C4M2G3	EHI_040340	24 kDa	0	0	0	1.654	0.91705	1.496
RNA recognition motif domain containing protein OS=Entamoeba histolytica HM-1:IMSS OX=294381 GN=EHI_026440 PE=4 SV=1	C4M5W4 (+2)	EHI_026440	29 kDa	0	0	6.0795	0.55132	0.45853	1.122
Peptidase S59 domain-containing protein OS=Entamoeba histolytica HM-1:IMSS OX=294381 GN=EHI_108620 PE=4 SV=1	C4M830 (+2)	EHI_108620	71 kDa	0	0	0	1.654	2.2926	1.496
Protein tyrosine kinase domain-containing protein OS=Entamoeba histolytica HM-1:IMSS OX=294381 GN=EHI_101280 PE=4 SV=1	C4M8B8	EHI_101280	134 kDa	0	0	0	1.654	1.3756	0.37401
Small GTPase Rab11B OS=Entamoeba histolytica HM-1:IMSS OX=294381 GN=EHI_107250 PE=4 SV=1	A0A8U0WPZ4 (+2)	EHI_107250	24 kDa	0	0	0	2.7566	0.91705	1.122
Heat shock protein 70 family OS=Entamoeba histolytica HM-1:IMSS OX=294381 GN=EHI_001950 PE=3 SV=1	C4M5K9 (+2)	EHI_001950	74 kDa	0	7.0927	0	3.3079	0.45853	0
40S ribosomal protein S15a, putative OS=Entamoeba histolytica HM-1:IMSS OX=294381 GN=EHI_073600 PE=3 SV=1	C4LXM0 (+2)	EHI_073600	15 kDa	8.6994	0	3.0397	0.55132	1.3756	0.74802
60S ribosomal protein L26, putative OS=Entamoeba histolytica HM-1:IMSS OX=294381 GN=EHI_111570 PE=3 SV=1	C4M569 (+2)	EHI_111570	24 kDa	4.3497	0	0	0	0.91705	0.74802
LIM zinc finger domain containing protein OS=Entamoeba histolytica HM-1:IMSS OX=294381 GN=EHI_161940 PE=4 SV=1	C4M6N7 (+2)	EHI_161940	21 kDa	0	0	0	0	0.45853	0.74802
Sulfate adenylyltransferase OS=Entamoeba histolytica HM-1:IMSS OX=294381 GN=EHI_197160 PE=3 SV=1	C4LVD3 (+2)	EHI_197160	48 kDa	0	0	3.0397	1.1026	1.3756	1.122
Uncharacterized protein OS=Entamoeba histolytica HM-1:IMSS OX=294381 GN=EHI_006980 PE=4 SV=1	A0A8U0WPN4	EHI_006980	120 kDa	0	0	0	0	0	0
Chromosome partition protein, putative OS=Entamoeba histolytica HM-1:IMSS OX=294381 GN=EHI_155530 PE=4 SV=1	C4LWA4 (+2)	EHI_155530	121 kDa	0	0	0	0	0.91705	0.74802
LisH domain-containing protein OS=Entamoeba histolytica HM-1:IMSS OX=294381 GN=EHI_051420 PE=4 SV=1	C4LY61 (+2)	EHI_051420	106 kDa	0	0	0	2.2053	1.3756	2.6181
DNAJ homolog subfamily A member 1, putative OS=Entamoeba histolytica HM-1:IMSS OX=294381 GN=EHI_182520 PE=4 SV=1	C4LV33 (+2)	EHI_182520	39 kDa	0	3.5464	0	1.654	0.91705	1.8701
60S ribosomal protein L14, putative OS=Entamoeba histolytica HM-1:IMSS OX=294381 GN=EHI_050130 PE=3 SV=1	C4LTQ0 (+2)	EHI_050130	13 kDa	0	3.5464	0	0	0.45853	0.37401
DNA-directed RNA polymerase subunit beta OS=Entamoeba histolytica HM-1:IMSS OX=294381 GN=EHI_186020 PE=3 SV=1	C4MAB3 (+2)	EHI_186020	125 kDa	0	0	0	2.2053	1.3756	3.7401
40S ribosomal protein S18, putative OS=Entamoeba histolytica HM-1:IMSS OX=294381 GN=EHI_009680 PE=3 SV=1	C4LZ42 (+3)	EHI_009680	18 kDa	4.3497	3.5464	6.0795	0.55132	0.91705	0.74802
DNA-directed RNA polymerase III subunit RPC5 OS=Entamoeba histolytica HM-1:IMSS OX=294381 GN=EHI_093820 PE=3 SV=1	C4LYH3 (+2)	EHI_093820	48 kDa	0	0	0	2.2053	0.45853	2.9921
60S ribosomal protein L6, putative OS=Entamoeba histolytica HM-1:IMSS OX=294381 GN=EHI_067520 PE=3 SV=1	C4M9F8	EHI_067520	23 kDa	0	0	0	0	0	0
90 kDa heat shock protein, putative OS=Entamoeba histolytica HM-1:IMSS OX=294381 GN=EHI_163480 PE=3 SV=1	C4M3S9 (+2)	EHI_163480	81 kDa	0	0	3.0397	2.7566	1.8341	0.74802
EF-hand domain-containing protein OS=Entamoeba histolytica HM-1:IMSS OX=294381 GN=EHI_017560 PE=4 SV=1	C4M3G1 (+1)	EHI_017560	41 kDa	0	0	0	0	0.91705	1.496
Fe-S cluster assembly protein NifU, putative OS=Entamoeba histolytica HM-1:IMSS OX=294381 GN=EHI_049620 PE=4 SV=1	A0A8U0WQ51 (+2)	EHI_049620	39 kDa	8.6994	14.185	6.0795	1.654	0	0.74802
Uro-adherence factor A, putative OS=Entamoeba histolytica HM-1:IMSS OX=294381 GN=EHI_060430 PE=4 SV=1	C4M6J8	EHI_060430	120 kDa	0	0	0	1.1026	0.45853	1.122
ATP-binding cassette, putative OS=Entamoeba histolytica HM-1:IMSS OX=294381 GN=EHI_095820 PE=4 SV=1	C4M3D9	EHI_095820	152 kDa	0	0	0	0.55132	0.45853	0.74802
DNA double-strand break repair Rad50 ATPase OS=Entamoeba histolytica HM-1:IMSS OX=294381 GN=EHI_084660 PE=4 SV=1	C4M1J7 (+1)	EHI_084660	122 kDa	0	0	0	2.2053	1.3756	0.37401
Calponin-domain containing family protein OS=Entamoeba histolytica HM-1:IMSS-B OX=885319 GN=EHI8A_180230 PE=4 SV=1	M3US77 (+1)	EHI8A_180230	26 kDa	0	0	0	0	0	0
Protein disulfide isomerase, putative OS=Entamoeba histolytica HM-1:IMSS OX=294381 GN=EHI_071590 PE=3 SV=1	C4MB38	EHI_071590	42 kDa	4.3497	3.5464	0	1.1026	0.45853	0.37401
Uncharacterized protein OS=Entamoeba histolytica HM-1:IMSS OX=294381 GN=EHI_099350 PE=4 SV=1	C4M6C3 (+2)	EHI_099350	24 kDa	0	0	0	3.8593	2.7512	1.122
Calponin-homology (CH) domain-containing protein OS=Entamoeba histolytica HM-1:IMSS OX=294381 GN=EHI_177190 PE=4 SV=1	C4LY33 (+1)	EHI_177190	84 kDa	0	0	0	3.3079	2.2926	0.74802
ATP synthase (E/31 kDa) subunit, putative (Fragment) OS=Entamoeba histolytica HM-1:IMSS-B OX=885319 GN=EHI8A_118640 PE=3 SV=1	M3UU68	EHI8A_118640	45 kDa	0	0	0	1.654	1.3756	1.122
60S ribosomal protein L2/L8, putative OS=Entamoeba histolytica HM-1:IMSS OX=294381 GN=EHI_127200 PE=3 SV=1	C4LWZ3	EHI_127200	28 kDa	0	0	6.0795	1.1026	0.91705	0.37401
Enhancer binding protein-2, putative OS=Entamoeba histolytica HM-1:IMSS OX=294381 GN=EHI_182670 PE=4 SV=1	C4LV48 (+2)	EHI_182670	26 kDa	0	3.5464	3.0397	0	0	0
Uncharacterized protein OS=Entamoeba histolytica HM-1:IMSS OX=294381 GN=EHI_047800 PE=4 SV=1	C4M7X1 (+1)	EHI_047800	34 kDa	0	0	0	0.55132	0.91705	1.122
Mucin-2, putative OS=Entamoeba histolytica HM-1:IMSS OX=294381 GN=EHI_173410 PE=3 SV=1	C4M6H8	EHI_173410	59 kDa	0	0	0	0.55132	1.8341	1.122
Coronin OS=Entamoeba histolytica HM-1:IMSS OX=294381 GN=EHI_122800 PE=3 SV=1	C4M5M6 (+1)	EHI_122800	187 kDa	0	0	0	2.2053	0.91705	1.8701
PPM-type phosphatase domain-containing protein OS=Entamoeba histolytica HM-1:IMSS OX=294381 GN=EHI_138330 PE=4 SV=1	C4M3H6 (+1)	EHI_138330	102 kDa	0	0	0	0.55132	1.3756	2.2441
Adhesin 112 (EhADH112) OS=Entamoeba histolytica HM-1:IMSS OX=294381 GN=EHI_181220 PE=4 SV=1	A0A8U0WNY2 (+2)	EHI_181220	78 kDa	0	0	0	0.55132	1.3756	0.74802
Malate dehydrogenase, putative OS=Entamoeba histolytica HM-1:IMSS OX=294381 GN=EHI_165350 PE=1 SV=1	C4M213 (+2)	EHI_165350	40 kDa	4.3497	7.0927	3.0397	1.1026	0.45853	0.74802
60S ribosomal protein L32, putative OS=Entamoeba histolytica HM-1:IMSS OX=294381 GN=EHI_092430 PE=3 SV=1	C4LV05 (+3)	EHI_092430	16 kDa	4.3497	3.5464	3.0397	1.1026	1.3756	1.496
Actin-related protein 3, putative OS=Entamoeba histolytica HM-1:IMSS OX=294381 GN=EHI_198930 PE=3 SV=1	C4LWT9 (+2)	EHI_198930	47 kDa	0	0	0	0.55132	0.45853	0
Actin binding protein, putative OS=Entamoeba histolytica HM-1:IMSS OX=294381 GN=EHI_104390 PE=4 SV=1	C4LZ50	EHI_104390	64 kDa	0	0	0	2.2053	0.91705	0.74802
Zinc finger, C2H2 type family protein OS=Entamoeba histolytica HM-1:IMSS OX=294381 GN=EHI_158220 PE=4 SV=1	C4M2E1 (+2)	EHI_158220	42 kDa	0	0	0	1.1026	0.91705	1.8701
40S ribosomal protein S5, putative OS=Entamoeba histolytica HM-1:IMSS OX=294381 GN=EHI_044590 PE=3 SV=1	C4LT81	EHI_044590	23 kDa	0	3.5464	3.0397	0	0.45853	0.74802
40S ribosomal protein S16, putative OS=Entamoeba histolytica HM-1:IMSS OX=294381 GN=EHI_038620 PE=3 SV=1	C4LZP6	EHI_038620	17 kDa	0	0	0	0.55132	0.45853	0.74802
Actin-related protein 2/3 complex subunit 3 OS=Entamoeba histolytica HM-1:IMSS OX=294381 GN=EHI_174910 PE=3 SV=1	C4LZL6 (+1)	EHI_174910	22 kDa	0	0	0	0.55132	0.45853	0.74802
Nucleoporin p58/p45 OS=Entamoeba histolytica HM-1:IMSS OX=294381 GN=EHI_010010 PE=4 SV=1	C4M0R5 (+2)	EHI_010010	33 kDa	0	0	0	0.55132	0.91705	0.74802
Uncharacterized protein OS=Entamoeba histolytica HM-1:IMSS OX=294381 GN=EHI_020080 PE=4 SV=1	C4MAN1 (+2)	EHI_020080	32 kDa	0	0	0	1.1026	0.45853	0.37401
Syntaxin binding protein, putative OS=Entamoeba histolytica HM-1:IMSS OX=294381 GN=EHI_093130 PE=4 SV=1	A0A8U0WPZ7 (+1)	EHI_093130	70 kDa	0	0	0	1.1026	1.8341	2.6181
40S ribosomal protein S14, putative OS=Entamoeba histolytica HM-1:IMSS OX=294381 GN=EHI_012360 PE=3 SV=1	B1N2I3 (+2)	EHI_012360	16 kDa	0	0	6.0795	1.1026	0	1.122
C2 domain containing protein OS=Entamoeba histolytica HM-1:IMSS OX=294381 GN=EHI_069320 PE=4 SV=1	C4LWM0 (+2)	EHI_069320	21 kDa	0	0	3.0397	1.1026	1.3756	1.122
EF-hand calcium-binding domain containing protein OS=Entamoeba histolytica HM-1:IMSS OX=294381 GN=EHI_016120 PE=4 SV=1	C4MAN5 (+2)	EHI_016120	76 kDa	0	0	0	2.7566	1.3756	1.8701
Ran-binding protein, putative OS=Entamoeba histolytica HM-1:IMSS OX=294381 GN=EHI_009630 PE=3 SV=1	C4LZ37 (+2)	EHI_009630	120 kDa	0	0	0	0.55132	1.8341	2.2441
Vesicle-fusing ATPase OS=Entamoeba histolytica HM-1:IMSS OX=294381 GN=EHI_004640 PE=3 SV=1	C4LYS4 (+2)	EHI_004640	83 kDa	0	0	0	2.7566	0.91705	1.8701
Serine-threonine-isoleucine rich protein, putative OS=Entamoeba histolytica HM-1:IMSS OX=294381 GN=EHI_073630 PE=4 SV=1	C4LXM3 (+1)	EHI_073630	559 kDa	0	0	0	0	4.1267	1.122
RhoGAP domain containing protein OS=Entamoeba histolytica HM-1:IMSS OX=294381 GN=EHI_049570 PE=4 SV=1	C4LUF8	EHI_049570	73 kDa	13.049	10.639	12.159	0	0	0
VPS9 domain-containing protein OS=Entamoeba histolytica HM-1:IMSS OX=294381 GN=EHI_163600 PE=4 SV=1	C4M3U1 (+2)	EHI_163600	71 kDa	0	0	0	1.654	1.8341	1.496
GTP-binding nuclear protein OS=Entamoeba histolytica HM-1:IMSS OX=294381 GN=EHI_148190 PE=3 SV=1	C4LSY9 (+2)	EHI_148190	25 kDa	0	0	0	1.654	0.91705	1.122
C2 domain containing protein OS=Entamoeba histolytica HM-1:IMSS OX=294381 GN=EHI_059860 PE=4 SV=1	C4M344	EHI_059860	22 kDa	0	10.639	6.0795	1.654	0.45853	0.74802
Dynamin-like protein OS=Entamoeba histolytica HM-1:IMSS OX=294381 GN=EHI_052740 PE=3 SV=1	C4M3R5 (+2)	EHI_052740	75 kDa	8.6994	0	6.0795	1.1026	1.8341	0.37401
Centromere/microtubule binding protein cbf5, putative OS=Entamoeba histolytica HM-1:IMSS OX=294381 GN=EHI_115300 PE=3 SV=1	C4M8E1 (+2)	EHI_115300	54 kDa	0	0	0	0	0.91705	1.122
Transmembrane domain-containing protein OS=Entamoeba histolytica HM-1:IMSS OX=294381 GN=EHI_158120 PE=4 SV=1	C4M2D1 (+2)	EHI_158120	59 kDa	0	0	0	1.1026	1.3756	1.122
Protein kinase domain containing protein OS=Entamoeba histolytica HM-1:IMSS OX=294381 GN=EHI_110250 PE=4 SV=1	C4LU78 (+2)	EHI_110250	72 kDa	0	0	0	1.1026	3.2097	1.496
Uncharacterized protein OS=Entamoeba histolytica HM-1:IMSS OX=294381 GN=EHI_155590 PE=4 SV=1	C4LWB0 (+2)	EHI_155590	20 kDa	0	0	0	1.1026	0.45853	0.37401
Uncharacterized protein OS=Entamoeba histolytica HM-1:IMSS OX=294381 GN=EHI_031390 PE=4 SV=1	C4M4L6 (+2)	EHI_031390	20 kDa	0	0	0	2.7566	1.3756	1.122
WD domain containing protein OS=Entamoeba histolytica HM-1:IMSS OX=294381 GN=EHI_118780 PE=4 SV=1	C4LYM6 (+2)	EHI_118780	38 kDa	0	0	0	0.55132	0.91705	1.122
RING-type domain-containing protein OS=Entamoeba histolytica HM-1:IMSS OX=294381 GN=EHI_192840 PE=4 SV=1	B1N4D3 (+2)	EHI_192840	82 kDa	0	0	0	0	0.91705	1.8701
Axoneme-associated protein mst101 OS=Entamoeba histolytica HM-1:IMSS OX=294381 GN=EHI_177640 PE=4 SV=1	C4LY17 (+2)	EHI_177640	56 kDa	0	0	0	0	0.91705	1.122
Soluble calcium-activated nucleotidase 1, putative OS=Entamoeba histolytica HM-1:IMSS OX=294381 GN=EHI_103690 PE=3 SV=1	C4LVL3 (+2)	EHI_103690	39 kDa	0	0	0	0.55132	0.45853	1.122
Uncharacterized protein OS=Entamoeba histolytica HM-1:IMSS OX=294381 GN=EHI_021190 PE=4 SV=1	C4M035	EHI_021190	39 kDa	0	0	0	1.1026	2.7512	0
p-glycoprotein-1 OS=Entamoeba histolytica HM-1:IMSS OX=294381 GN=EHI_114150 PE=4 SV=1	C4M422	EHI_114150	145 kDa	0	0	0	2.7566	2.2926	3.3661
14-3-3 protein 1 OS=Entamoeba histolytica HM-1:IMSS OX=294381 GN=EHI_025360 PE=3 SV=1	C4M323 (+2)	EHI_025360	27 kDa	0	0	0	0	0.45853	0
Axoneme-associated protein OS=Entamoeba histolytica HM-1:IMSS OX=294381 GN=EHI_117850 PE=4 SV=1	C4LYW9 (+2)	EHI_117850	18 kDa	0	0	0	1.654	1.3756	0.74802
Phospholipid-transporting ATPase OS=Entamoeba histolytica HM-1:IMSS OX=294381 GN=EHI_096620 PE=3 SV=1	C4LWH4 (+2)	EHI_096620	132 kDa	0	0	0	1.1026	1.3756	1.496
C2 domain protein, putative OS=Entamoeba histolytica HM-1:IMSS OX=294381 GN=EHI_015290 PE=3 SV=1	C4M0W7 (+2)	EHI_015290	30 kDa	0	0	0	1.654	0.91705	1.8701
Protein tyrosine kinase domain-containing protein OS=Entamoeba histolytica HM-1:IMSS OX=294381 GN=EHI_201270 PE=4 SV=1	C4M6Q6	EHI_201270	134 kDa	0	0	0	0	0.91705	1.122
60S ribosomal protein L10, putative OS=Entamoeba histolytica HM-1:IMSS OX=294381 GN=EHI_044810 PE=3 SV=1	C4LTA0	EHI_044810	24 kDa	0	3.5464	0	0.55132	0.45853	0.74802
Vacuolar protein sorting-associated protein OS=Entamoeba histolytica HM-1:IMSS OX=294381 GN=EHI_055720 PE=4 SV=1	C4M7B4 (+2)	EHI_055720	66 kDa	0	0	0	1.1026	1.3756	2.6181
WD_REPEATS_REGION domain-containing protein OS=Entamoeba histolytica HM-1:IMSS OX=294381 GN=EHI_104430 PE=4 SV=1	C4LZ54 (+2)	EHI_104430	73 kDa	0	0	0	0	0.45853	0
20 kDa antigen OS=Entamoeba histolytica HM-1:IMSS OX=294381 GN=EHI_057670 PE=4 SV=1	C4M6Z9 (+1)	EHI_057670	21 kDa	4.3497	0	6.0795	0.55132	1.8341	0.74802
DNA double-strand break repair Rad50 ATPase OS=Entamoeba histolytica HM-1:IMSS OX=294381 GN=EHI_122900 PE=4 SV=1	C4M5M1 (+1)	EHI_122900	74 kDa	0	0	0	2.2053	1.8341	0.74802
60S ribosomal protein L24, putative OS=Entamoeba histolytica HM-1:IMSS OX=294381 GN=EHI_030760 PE=3 SV=1	C4LSA0	EHI_030760	19 kDa	8.6994	0	6.0795	0.55132	0	0
LIM zinc finger domain containing protein OS=Entamoeba histolytica HM-1:IMSS OX=294381 GN=EHI_025450 PE=4 SV=1	C4M332 (+2)	EHI_025450	25 kDa	0	0	0	1.1026	1.8341	1.496
Phosphoglycerate kinase OS=Entamoeba histolytica HM-1:IMSS OX=294381 GN=EHI_188180 PE=3 SV=1	C4M192 (+2)	EHI_188180	45 kDa	0	0	0	1.1026	0.45853	0
60S ribosomal protein L13, putative OS=Entamoeba histolytica HM-1:IMSS OX=294381 GN=EHI_181560 PE=3 SV=1	C4M8R8	EHI_181560	33 kDa	0	0	0	0.55132	0.45853	0.37401
Uncharacterized protein OS=Entamoeba histolytica HM-1:IMSS OX=294381 GN=EHI_048240 PE=4 SV=1	C4M4B5 (+2)	EHI_048240	20 kDa	0	0	0	1.654	1.3756	0.37401
V-type proton ATPase subunit OS=Entamoeba histolytica HM-1:IMSS OX=294381 GN=EHI_106350 PE=3 SV=1	C4M399 (+2)	EHI_106350	40 kDa	0	0	0	0	0	0.74802
Cell surface protease gp63, putative OS=Entamoeba histolytica HM-1:IMSS OX=294381 GN=EHI_200230 PE=3 SV=1	C4M7M4 (+2)	EHI_200230	72 kDa	0	0	0	1.654	1.8341	1.122
NTF2 domain-containing protein OS=Entamoeba histolytica HM-1:IMSS OX=294381 GN=EHI_080900 PE=3 SV=1	C4MAD6 (+2)	EHI_080900	52 kDa	0	0	0	0	0.45853	0.74802
Transmembrane protein OS=Entamoeba histolytica HM-1:IMSS OX=294381 GN=EHI_088470 PE=4 SV=1	C4MA16 (+2)	EHI_088470	19 kDa	0	0	0	0.55132	0.45853	0.74802
Uncharacterized protein OS=Entamoeba histolytica HM-1:IMSS OX=294381 GN=EHI_170460 PE=4 SV=1	A0A8U0WQ52 (+2)	EHI_170460	39 kDa	0	0	0	0.55132	1.3756	0.37401
Uncharacterized protein OS=Entamoeba histolytica HM-1:IMSS-B OX=885319 GN=EHI8A_039800 PE=4 SV=1	M3THR8 (+1)	EHI8A_039800	29 kDa	0	0	0	1.1026	1.8341	1.122
Malic enzyme, putative OS=Entamoeba histolytica HM-1:IMSS OX=294381 GN=EHI_044970 PE=1 SV=1	A0A8U0WNY6 (+3)	EHI_044970	53 kDa	0	3.5464	9.1192	0.55132	0.45853	0
CHAD domain-containing protein OS=Entamoeba histolytica HM-1:IMSS OX=294381 GN=EHI_182980 PE=4 SV=1	B1N2P1	EHI_182980	34 kDa	0	0	0	1.1026	0.91705	0
Peptidase S74 domain-containing protein OS=Entamoeba histolytica HM-1:IMSS OX=294381 GN=EHI_185450 PE=4 SV=1	B1N494	EHI_185450	94 kDa	0	0	0	0.55132	0.91705	1.8701
Histone H1-like nucleoprotein HC2 OS=Entamoeba histolytica HM-1:IMSS OX=294381 GN=EHI_096340 PE=4 SV=1	C4LWE7 (+2)	EHI_096340	40 kDa	0	0	0	0.55132	1.3756	0.74802
F_actin_bund_C domain-containing protein OS=Entamoeba histolytica HM-1:IMSS OX=294381 GN=EHI_004550 PE=4 SV=1	C4LYR5 (+1)	EHI_004550	45 kDa	0	0	6.0795	0.55132	0	0.37401
Rab family GTPase OS=Entamoeba histolytica HM-1:IMSS OX=294381 GN=EHI_199820 PE=4 SV=1	A0A8U0WPS5 (+2)	EHI_199820	22 kDa	0	0	6.0795	1.654	1.3756	1.122
SNF7 family protein OS=Entamoeba histolytica HM-1:IMSS OX=294381 GN=EHI_169820 PE=4 SV=1	C4M1A5 (+2)	EHI_169820	24 kDa	0	0	0	0	1.3756	0.74802
WH2 domain-containing protein OS=Entamoeba histolytica HM-1:IMSS OX=294381 GN=EHI_016130 PE=4 SV=1	C4MAN6 (+2)	EHI_016130	56 kDa	0	0	0	0.55132	2.2926	1.496
Chromosome partition protein Smc OS=Entamoeba histolytica HM-1:IMSS OX=294381 GN=EHI_107130 PE=4 SV=1	C4M154 (+1)	EHI_107130	40 kDa	0	0	0	1.1026	0.91705	1.122
60S ribosomal protein L17, putative OS=Entamoeba histolytica HM-1:IMSS OX=294381 GN=EHI_127330 PE=3 SV=1	C4LX05 (+1)	EHI_127330	20 kDa	0	3.5464	3.0397	0.55132	1.8341	1.122
Profilin OS=Entamoeba histolytica HM-1:IMSS OX=294381 GN=EHI_176140 PE=3 SV=1	C4MB21 (+2)	EHI_176140	13 kDa	0	3.5464	0	1.1026	0.91705	0.37401
Rab family GTPase OS=Entamoeba histolytica HM-1:IMSS OX=294381 GN=EHI_046390 PE=4 SV=1	A0A8U0WQ41	EHI_046390	24 kDa	0	0	0	1.654	1.3756	1.122
Nucleoporin NUP53 OS=Entamoeba histolytica HM-1:IMSS OX=294381 GN=EHI_026310 PE=4 SV=1	C4M5V9 (+2)	EHI_026310	51 kDa	0	0	0	1.1026	1.3756	0.74802
Uncharacterized protein OS=Entamoeba histolytica HM-1:IMSS OX=294381 GN=EHI_192420 PE=4 SV=1	C4M1G2 (+1)	EHI_192420	34 kDa	0	0	0	1.1026	0	0.74802
Uncharacterized protein OS=Entamoeba histolytica HM-1:IMSS-B OX=885319 GN=EHI8A_147110 PE=4 SV=1	M3S967 (+1)	EHI8A_147110	30 kDa	0	0	0	0.55132	1.3756	1.122
DNA-directed RNA polymerase II large subunit, putative OS=Entamoeba histolytica HM-1:IMSS OX=294381 GN=EHI_121760 PE=4 SV=1	A0A8U0WPB3 (+2)	EHI_121760	185 kDa	0	0	0	0	0	0.74802
Caldesmon OS=Entamoeba histolytica HM-1:IMSS OX=294381 GN=EHI_092080 PE=4 SV=1	C4LUX3 (+2)	EHI_092080	58 kDa	0	0	0	1.1026	0.91705	0
RhoGAP domain containing protein OS=Entamoeba histolytica HM-1:IMSS OX=294381 GN=EHI_017650 PE=4 SV=1	C4M3H0 (+2)	EHI_017650	48 kDa	0	0	0	0.55132	0	1.122
Beige/BEACH domain containing protein OS=Entamoeba histolytica HM-1:IMSS OX=294381 GN=EHI_175420 PE=4 SV=1	C4M3A9 (+2)	EHI_175420	100 kDa	0	0	0	0	0.45853	1.496
Proteasome subunit alpha type OS=Entamoeba histolytica HM-1:IMSS OX=294381 GN=EHI_163650 PE=3 SV=1	C4M3U5 (+1)	EHI_163650	28 kDa	0	3.5464	0	0.55132	0.91705	0
Enhancer binding protein-1 OS=Entamoeba histolytica HM-1:IMSS OX=294381 GN=EHI_121780 PE=4 SV=1	C4M5C4 (+2)	EHI_121780	35 kDa	4.3497	3.5464	3.0397	1.1026	0.91705	0
CXXC-rich protein OS=Entamoeba histolytica HM-1:IMSS OX=294381 GN=EHI_111990 PE=3 SV=1	C4M7I1 (+2)	EHI_111990	131 kDa	0	0	0	0.55132	1.8341	1.122
Uncharacterized protein OS=Entamoeba histolytica HM-1:IMSS OX=294381 GN=EHI_107040 PE=4 SV=1	A0A8U0WP02 (+2)	EHI_107040	32 kDa	0	0	0	0.55132	0.45853	1.496
Ccaat-box-binding transcription factor, putative OS=Entamoeba histolytica HM-1:IMSS OX=294381 GN=EHI_132370 PE=3 SV=1	C4M8Q0 (+2)	EHI_132370	84 kDa	0	0	0	0.55132	0	1.122
V-type proton ATPase subunit a OS=Entamoeba histolytica HM-1:IMSS OX=294381 GN=EHI_074020 PE=3 SV=1	C4M2Z1 (+2)	EHI_074020	93 kDa	0	0	0	1.1026	1.8341	1.122
WD domain, G-beta repeat protein OS=Entamoeba histolytica HM-1:IMSS OX=294381 GN=EHI_178780 PE=4 SV=1	C4LUU2 (+2)	EHI_178780	102 kDa	0	0	0	0.55132	0.45853	0
Protein serine/threonine kinase OS=Entamoeba histolytica HM-1:IMSS OX=294381 GN=EHI_052880 PE=4 SV=1	C4M3S6 (+2)	EHI_052880	200 kDa	0	0	0	0.55132	0.91705	1.8701
Heat shock protein 90, putative OS=Entamoeba histolytica HM-1:IMSS OX=294381 GN=EHI_102270 PE=3 SV=1	C4MBP1 (+1)	EHI_102270	83 kDa	0	0	0	3.8593	2.7512	0
Adenylyl-sulfate kinase OS=Entamoeba histolytica HM-1:IMSS OX=294381 GN=EHI_179080 PE=3 SV=1	C4LUW9 (+2)	EHI_179080	53 kDa	0	0	0	1.654	1.3756	2.2441
LisH domain-containing protein OS=Entamoeba histolytica HM-1:IMSS OX=294381 GN=EHI_138520 PE=4 SV=1	C4M3J4 (+2)	EHI_138520	111 kDa	0	0	0	0	0.45853	0
Helicase, putative OS=Entamoeba histolytica HM-1:IMSS OX=294381 GN=EHI_044890 PE=4 SV=1	C4LTA8 (+2)	EHI_044890	112 kDa	0	0	0	0	1.3756	0.74802
TBC domain containing protein OS=Entamoeba histolytica HM-1:IMSS OX=294381 GN=EHI_009510 PE=4 SV=1	C4LZ27 (+2)	EHI_009510	36 kDa	0	0	0	0.55132	1.3756	1.122
5'-3' exoribonuclease OS=Entamoeba histolytica HM-1:IMSS OX=294381 GN=EHI_132400 PE=3 SV=1	C4M8Q3 (+2)	EHI_132400	92 kDa	0	0	0	0	0	1.122
Transcription elongation factor spt6 OS=Entamoeba histolytica HM-1:IMSS OX=294381 GN=EHI_092290 PE=4 SV=1	C4LUZ3	EHI_092290	145 kDa	0	0	0	0	0	1.8701
40S ribosomal protein S24, putative OS=Entamoeba histolytica HM-1:IMSS OX=294381 GN=EHI_148820 PE=3 SV=1	C4LT49 (+2)	EHI_148820	16 kDa	0	0	0	1.1026	0.91705	1.122
Coronin OS=Entamoeba histolytica HM-1:IMSS OX=294381 GN=EHI_083590 PE=3 SV=1	C4M943 (+1)	EHI_083590	48 kDa	0	3.5464	0	0	0.91705	0
60S ribosomal protein L7, putative OS=Entamoeba histolytica HM-1:IMSS OX=294381 GN=EHI_025830 PE=3 SV=1	C4M938	EHI_025830	26 kDa	0	0	3.0397	0	0	0
Nucleolar GTP-binding protein 1 OS=Entamoeba histolytica HM-1:IMSS OX=294381 GN=EHI_174940 PE=3 SV=1	C4LZL9 (+1)	EHI_174940	76 kDa	0	0	0	1.1026	0	0.37401
Viral A-type inclusion protein OS=Entamoeba histolytica HM-1:IMSS OX=294381 GN=EHI_064640 PE=4 SV=1	C4M0D0 (+2)	EHI_064640	31 kDa	0	0	0	1.1026	1.8341	1.122
Sec1 family protein OS=Entamoeba histolytica HM-1:IMSS OX=294381 GN=EHI_060310 PE=4 SV=1	C4M6I8 (+2)	EHI_060310	53 kDa	0	0	0	0.55132	0.91705	0.74802
ShKT domain-containing protein OS=Entamoeba histolytica HM-1:IMSS OX=294381 GN=EHI_050520 PE=4 SV=1	C4LTS5 (+2)	EHI_050520	25 kDa	0	0	0	0.55132	0.45853	0
60S acidic ribosomal protein P0 OS=Entamoeba histolytica HM-1:IMSS OX=294381 GN=EHI_090400 PE=3 SV=1	B1N2Z3	EHI_090400	34 kDa	0	0	9.1192	0	0.45853	0
26s proteasome subunit P45 family protein, putative OS=Entamoeba histolytica HM-1:IMSS OX=294381 GN=EHI_177320 PE=3 SV=1	C4LY36 (+2)	EHI_177320	44 kDa	0	0	0	1.1026	0.91705	0.74802
Uncharacterized protein OS=Entamoeba histolytica HM-1:IMSS OX=294381 GN=EHI_131050 PE=4 SV=1	C4LXH3 (+2)	EHI_131050	52 kDa	0	0	0	0.55132	0.45853	0.74802
Galactose-inhibitable lectin small subunit, putative OS=Entamoeba histolytica HM-1:IMSS OX=294381 GN=EHI_159870 PE=4 SV=1	B1N2V4 (+2)	EHI_159870	31 kDa	0	0	0	1.654	0.91705	1.496
Axoneme-associated protein mst101(2)-like OS=Entamoeba histolytica HM-1:IMSS OX=294381 GN=EHI_096350 PE=4 SV=1	C4LWE8 (+2)	EHI_096350	59 kDa	0	0	0	2.2053	1.8341	2.2441
Gal/GalNAc lectin heavy subunit, putative OS=Entamoeba histolytica HM-1:IMSS OX=294381 GN=EHI_046650 PE=4 SV=1	C4M7A1 (+1)	EHI_046650	135 kDa	0	0	0	0.55132	1.3756	1.122
Rho guanine nucleotide exchange factor, putative OS=Entamoeba histolytica HM-1:IMSS OX=294381 GN=EHI_078740 PE=1 SV=1	C4M4E9 (+2)	EHI_078740	99 kDa	0	0	0	1.654	0	1.122
DNA double-strand break repair Rad50 ATPase OS=Entamoeba histolytica HM-1:IMSS OX=294381 GN=EHI_066720 PE=4 SV=1	C4MAC6 (+2)	EHI_066720	242 kDa	0	0	0	0.55132	0.45853	1.496
60S ribosomal protein L12, putative OS=Entamoeba histolytica HM-1:IMSS OX=294381 GN=EHI_030710 PE=3 SV=1	C4M1E1	EHI_030710	18 kDa	0	3.5464	0	1.1026	0.91705	1.122
60S ribosomal protein L7, putative OS=Entamoeba histolytica HM-1:IMSS OX=294381 GN=EHI_010650 PE=3 SV=1	C4LYV2 (+2)	EHI_010650	26 kDa	0	0	0	0	1.3756	0.37401
Transmembrane protein OS=Entamoeba histolytica HM-1:IMSS OX=294381 GN=EHI_068670 PE=4 SV=1	C4LU57 (+2)	EHI_068670	19 kDa	0	0	0	1.1026	0.91705	0.74802
Uncharacterized protein OS=Entamoeba histolytica HM-1:IMSS OX=294381 GN=EHI_182730 PE=4 SV=1	C4LV54 (+2)	EHI_182730	19 kDa	0	0	0	1.1026	1.3756	0.74802
Serine/threonine protein kinase OS=Entamoeba histolytica HM-1:IMSS OX=294381 GN=EHI_015420 PE=4 SV=1	B1N399 (+2)	EHI_015420	85 kDa	0	0	0	0	1.3756	1.496
Uncharacterized protein OS=Entamoeba histolytica HM-1:IMSS OX=294381 GN=EHI_069150 PE=4 SV=1	B1N2T7 (+2)	EHI_069150	39 kDa	0	0	0	0	0.45853	0.74802
ANK_REP_REGION domain-containing protein OS=Entamoeba histolytica HM-1:IMSS OX=294381 GN=EHI_021460 PE=4 SV=1	C4M060 (+2)	EHI_021460	82 kDa	0	0	0	0	0.91705	0.74802
40S ribosomal protein S13, putative OS=Entamoeba histolytica HM-1:IMSS OX=294381 GN=EHI_035460 PE=3 SV=1	A0A175JJM9 (+1)	EHI_035460	17 kDa	0	0	0	0	0	0.37401
TLDc domain-containing protein OS=Entamoeba histolytica HM-1:IMSS OX=294381 GN=EHI_201280 PE=4 SV=1	C4M6Q7 (+2)	EHI_201280	45 kDa	0	0	0	1.654	0.91705	1.8701
Secreted protein OS=Entamoeba histolytica HM-1:IMSS OX=294381 GN=EHI_050510 PE=4 SV=1	C4LTS4 (+2)	EHI_050510	42 kDa	0	0	0	2.2053	1.3756	1.122
F-box only protein OS=Entamoeba histolytica HM-1:IMSS OX=294381 GN=EHI_153290 PE=4 SV=1	C4LSC0 (+2)	EHI_153290	47 kDa	0	0	0	0	0.45853	0.37401
LTXXQ motif family protein OS=Entamoeba histolytica HM-1:IMSS OX=294381 GN=EHI_108710 PE=4 SV=1	C4M835 (+2)	EHI_108710	16 kDa	0	0	0	1.654	1.3756	1.496
p-glycoprotein-5 OS=Entamoeba histolytica HM-1:IMSS OX=294381 GN=EHI_175450 PE=4 SV=1	C4M3B2	EHI_175450	145 kDa	0	0	0	0	2.7512	3.7401
Uncharacterized protein OS=Entamoeba histolytica HM-1:IMSS OX=294381 GN=EHI_025370 PE=4 SV=1	C4M324 (+2)	EHI_025370	96 kDa	0	0	0	1.654	1.8341	0
Vacuolar ATP synthase subunit E, putative OS=Entamoeba histolytica HM-1:IMSS OX=294381 GN=EHI_182560 PE=3 SV=1	C4LV37 (+1)	EHI_182560	25 kDa	0	0	0	1.654	0	0
40S ribosomal protein S11, putative OS=Entamoeba histolytica HM-1:IMSS OX=294381 GN=EHI_155410 PE=3 SV=1	C4LW92 (+1)	EHI_155410	18 kDa	0	0	3.0397	0	0	0.74802
60S ribosomal protein L7, putative OS=Entamoeba histolytica HM-1:IMSS OX=294381 GN=EHI_141990 PE=4 SV=1	C4LW44 (+2)	EHI_141990	29 kDa	0	0	0	0.55132	0.91705	1.496
Cortexillin, putative OS=Entamoeba histolytica HM-1:IMSS OX=294381 GN=EHI_104560 PE=4 SV=1	B1N341	EHI_104560	65 kDa	0	0	0	0	0.91705	0.37401
SH3 domain-containing protein OS=Entamoeba histolytica HM-1:IMSS OX=294381 GN=EHI_130920 PE=3 SV=1	C4LXG0 (+1)	EHI_130920	280 kDa	0	0	0	1.654	0.45853	0.74802
NUC173 domain-containing protein OS=Entamoeba histolytica HM-1:IMSS OX=294381 GN=EHI_092660 PE=3 SV=1	C4LV26 (+2)	EHI_092660	129 kDa	0	0	0	0.55132	0	1.496
Rab family GTPase OS=Entamoeba histolytica HM-1:IMSS OX=294381 GN=EHI_005460 PE=4 SV=1	A0A8U0WP83 (+2)	EHI_005460	23 kDa	0	0	0	0	0	0.74802
Conserved secreted protein OS=Entamoeba histolytica HM-1:IMSS OX=294381 GN=EHI_148240 PE=4 SV=1	C4LSZ4 (+2)	EHI_148240	15 kDa	0	0	0	0	0.91705	0
Nucleotide binding protein 2, putative OS=Entamoeba histolytica HM-1:IMSS OX=294381 GN=EHI_000610 PE=3 SV=1	C4LZB2 (+2)	EHI_000610	29 kDa	0	0	0	0.55132	0.45853	0
Uncharacterized protein OS=Entamoeba histolytica HM-1:IMSS OX=294381 GN=EHI_067090 PE=4 SV=1	C4MA45 (+2)	EHI_067090	24 kDa	0	0	0	0.55132	1.3756	0.74802
Histone H2A OS=Entamoeba histolytica HM-1:IMSS OX=294381 GN=EHI_188960 PE=3 SV=1	C4M2W3	EHI_188960	18 kDa	0	0	0	0.55132	0.45853	0.37401
Uncharacterized protein OS=Entamoeba histolytica HM-1:IMSS OX=294381 GN=EHI_069560 PE=4 SV=1	C4LWP4 (+2)	EHI_069560	23 kDa	0	0	0	1.1026	1.3756	0.74802
Formin 2 OS=Entamoeba histolytica HM-1:IMSS OX=294381 GN=EHI_188820 PE=4 SV=1	C4M2U9 (+2)	EHI_188820	59 kDa	0	0	0	1.1026	0.91705	1.122
MIT domain protein OS=Entamoeba histolytica HM-1:IMSS OX=294381 GN=EHI_093860 PE=4 SV=1	C4LYH7 (+1)	EHI_093860	76 kDa	0	0	0	1.654	1.3756	0.74802
RRM domain-containing protein OS=Entamoeba histolytica HM-1:IMSS OX=294381 GN=EHI_048650 PE=4 SV=1	C4M2X8 (+2)	EHI_048650	19 kDa	0	0	0	1.1026	0.91705	2.6181
Intracellular protein transport protein USO1, putative OS=Entamoeba histolytica HM-1:IMSS OX=294381 GN=EHI_147540 PE=4 SV=1	B1N402 (+1)	EHI_147540	109 kDa	0	0	0	0.55132	0.91705	0
VHS domain-containing protein OS=Entamoeba histolytica HM-1:IMSS OX=294381 GN=EHI_004370 PE=4 SV=1	C4LYQ0 (+2)	EHI_004370	39 kDa	0	0	0	1.1026	1.3756	1.122
TolA protein, putative OS=Entamoeba histolytica HM-1:IMSS OX=294381 GN=EHI_159620 PE=4 SV=1	C4LX42 (+2)	EHI_159620	35 kDa	0	0	0	0	0	0
Sec1 family protein OS=Entamoeba histolytica HM-1:IMSS OX=294381 GN=EHI_160900 PE=4 SV=1	A0A8U0WPJ0 (+2)	EHI_160900	60 kDa	0	0	0	2.2053	0.45853	0.74802
Uncharacterized protein OS=Entamoeba histolytica HM-1:IMSS OX=294381 GN=EHI_068490 PE=4 SV=1	C4LU40 (+2)	EHI_068490	36 kDa	0	0	0	1.654	0.45853	1.8701
Heat shock protein, putative OS=Entamoeba histolytica HM-1:IMSS OX=294381 GN=EHI_022620 PE=3 SV=1	B1N2L8 (+2)	EHI_022620	98 kDa	0	0	0	3.3079	2.2926	0
40S ribosomal protein S26 OS=Entamoeba histolytica HM-1:IMSS OX=294381 GN=EHI_105180 PE=3 SV=1	C4M123 (+2)	EHI_105180	16 kDa	0	0	0	0	0.45853	0
Transmembrane protein 144 OS=Entamoeba histolytica HM-1:IMSS OX=294381 GN=EHI_057700 PE=3 SV=1	C4M705 (+2)	EHI_057700	44 kDa	0	0	0	1.654	0.45853	1.122
Non-specific serine/threonine protein kinase OS=Entamoeba histolytica HM-1:IMSS OX=294381 GN=EHI_151950 PE=3 SV=1	C4LSN4 (+2)	EHI_151950	39 kDa	0	0	0	1.1026	1.3756	0.74802
Rho family GTPase OS=Entamoeba histolytica HM-1:IMSS OX=294381 GN=EHI_070730 PE=3 SV=1	C4M5T0	EHI_070730	22 kDa	0	0	0	0	0.45853	0.74802
Nucleolar complex protein 2 homolog, putative OS=Entamoeba histolytica HM-1:IMSS OX=294381 GN=EHI_105790 PE=3 SV=1	C4M9H6 (+2)	EHI_105790	58 kDa	0	0	0	1.1026	0	1.8701
Villin, putative OS=Entamoeba histolytica HM-1:IMSS OX=294381 GN=EHI_007480 PE=4 SV=1	C4LYC0 (+2)	EHI_007480	77 kDa	0	0	0	1.654	0.91705	1.122
Beta_helix domain-containing protein OS=Entamoeba histolytica HM-1:IMSS OX=294381 GN=EHI_103420 PE=4 SV=1	C4LVI6 (+1)	EHI_103420	48 kDa	0	0	0	1.654	1.3756	0.37401
Saposin B-type domain-containing protein OS=Entamoeba histolytica HM-1:IMSS OX=294381 GN=EHI_048580 PE=4 SV=1	C4M2X1 (+1)	EHI_048580	105 kDa	0	0	0	1.1026	0.91705	0
BRO1 domain-containing protein OS=Entamoeba histolytica HM-1:IMSS OX=294381 GN=EHI_165220 PE=4 SV=1	C4M203 (+2)	EHI_165220	103 kDa	0	0	0	0	2.2926	1.122
Ribosomal protein L23A, putative OS=Entamoeba histolytica HM-1:IMSS OX=294381 GN=EHI_182850 PE=3 SV=1	C4LV64 (+2)	EHI_182850	14 kDa	0	0	0	0.55132	0.91705	0.74802
Periplasmic heavy metal sensor OS=Entamoeba histolytica HM-1:IMSS OX=294381 GN=EHI_081630 PE=4 SV=1	C4M684 (+1)	EHI_081630	20 kDa	0	0	0	0.55132	0	0.37401
F-actin-capping protein subunit beta OS=Entamoeba histolytica HM-1:IMSS OX=294381 GN=EHI_005020 PE=3 SV=1	C4M096 (+1)	EHI_005020	31 kDa	0	0	0	0	0.91705	0.74802
V-type proton ATPase subunit G OS=Entamoeba histolytica HM-1:IMSS OX=294381 GN=EHI_086230 PE=3 SV=1	C4M378 (+2)	EHI_086230	13 kDa	0	0	0	1.654	0.91705	1.496
p-glycoprotein 6, putative OS=Entamoeba histolytica HM-1:IMSS OX=294381 GN=EHI_050640 PE=4 SV=1	B1N2J5	EHI_050640	50 kDa	0	0	0	0	0.45853	0.74802
Protein tyrosine kinase domain-containing protein OS=Entamoeba histolytica HM-1:IMSS OX=294381 GN=EHI_064500 PE=4 SV=1	C4M0B9	EHI_064500	133 kDa	0	0	0	0	0.91705	0.37401
60S ribosomal protein L35a, putative OS=Entamoeba histolytica HM-1:IMSS OX=294381 GN=EHI_014110 PE=3 SV=1	B1N4V3 (+2)	EHI_014110	12 kDa	4.3497	3.5464	3.0397	0.55132	0.45853	0.37401
Pept_C1 domain-containing protein OS=Entamoeba histolytica HM-1:IMSS-B OX=885319 GN=EHI8A_021990 PE=3 SV=1	M3TBT6 (+1)	EHI8A_021990	63 kDa	0	0	0	2.2053	0.91705	0.74802
Ribosome biogenesis protein BOP1 homolog OS=Entamoeba histolytica HM-1:IMSS OX=294381 GN=EHI_163740 PE=3 SV=1	C4M3V4 (+1)	EHI_163740	68 kDa	0	0	0	0	0	1.122
Cysteine proteinase 2, putative OS=Entamoeba histolytica HM-1:IMSS-B OX=885319 GN=EHI8A_050360 PE=3 SV=1	M3S7G8	EHI8A_050360	35 kDa	0	0	0	1.1026	1.3756	0.74802
Calponin-homology (CH) domain-containing protein OS=Entamoeba histolytica HM-1:IMSS OX=294381 GN=EHI_156420 PE=4 SV=1	C4M4E1 (+2)	EHI_156420	46 kDa	0	0	0	0.55132	0.45853	0.37401
I/LWEQ domain protein OS=Entamoeba histolytica HM-1:IMSS OX=294381 GN=EHI_003930 PE=4 SV=1	C4M9B6 (+2)	EHI_003930	115 kDa	0	0	0	0	0.45853	0
G domain-containing protein OS=Entamoeba histolytica HM-1:IMSS OX=294381 GN=EHI_011270 PE=4 SV=1	C4M7D6	EHI_011270	93 kDa	0	0	0	0	0	1.496
40S ribosomal protein S10, putative OS=Entamoeba histolytica HM-1:IMSS OX=294381 GN=EHI_197030 PE=3 SV=1	C4LVC0 (+2)	EHI_197030	15 kDa	0	0	3.0397	0	0	0
Rho family GTPase OS=Entamoeba histolytica HM-1:IMSS OX=294381 GN=EHI_129750 PE=3 SV=1	C4M5Q7 (+2)	EHI_129750	22 kDa	0	0	0	0	0.45853	0.37401
Nucleolar phosphoprotein Nopp34, putative OS=Entamoeba histolytica HM-1:IMSS OX=294381 GN=EHI_068680 PE=4 SV=1	C4LU58 (+2)	EHI_068680	18 kDa	0	0	0	0.55132	0.91705	0.74802
Uncharacterized protein OS=Entamoeba histolytica HM-1:IMSS OX=294381 GN=EHI_182860 PE=4 SV=1	C4LV65 (+2)	EHI_182860	47 kDa	0	0	0	0	1.8341	0.74802
Rab family GTPase OS=Entamoeba histolytica HM-1:IMSS OX=294381 GN=EHI_161030 PE=3 SV=1	C4M2S0 (+2)	EHI_161030	24 kDa	0	0	0	1.1026	0.91705	0.74802
Eukaryotic translation initiation factor 5B OS=Entamoeba histolytica HM-1:IMSS OX=294381 GN=EHI_039330 PE=4 SV=1	C4M8C5	EHI_039330	67 kDa	0	0	0	1.654	0.45853	0
Nuclear pore protein, putative OS=Entamoeba histolytica HM-1:IMSS OX=294381 GN=EHI_179400 PE=4 SV=1	C4M9Y0 (+2)	EHI_179400	39 kDa	0	0	0	0.55132	0.45853	0.74802
SAC3/GANP family protein OS=Entamoeba histolytica HM-1:IMSS OX=294381 GN=EHI_199100 PE=4 SV=1	C4LWV5 (+2)	EHI_199100	57 kDa	0	0	0	0	0.45853	0.74802
Grainin, putative OS=Entamoeba histolytica HM-1:IMSS OX=294381 GN=EHI_120360 PE=4 SV=1	B1N4A1 (+2)	EHI_120360	25 kDa	0	0	0	0.55132	1.3756	1.122
Copine, putative OS=Entamoeba histolytica HM-1:IMSS OX=294381 GN=EHI_140260 PE=4 SV=1	C4M474 (+2)	EHI_140260	31 kDa	0	0	0	1.654	2.2926	2.9921
Steroid 5-alpha reductase, putative OS=Entamoeba histolytica HM-1:IMSS OX=294381 GN=EHI_076870 PE=3 SV=1	C4M2S8 (+2)	EHI_076870	34 kDa	0	3.5464	0	1.1026	0.91705	0.74802
Calmodulin, putative OS=Entamoeba histolytica HM-1:IMSS OX=294381 GN=EHI_000130 PE=4 SV=1	C4MB98	EHI_000130	17 kDa	0	0	0	0	0.45853	0.37401
NAD(FAD)-dependent dehydrogenase, putative OS=Entamoeba histolytica HM-1:IMSS OX=294381 GN=EHI_099700 PE=4 SV=1	C4M6H3	EHI_099700	116 kDa	0	0	0	0	0	0
HECT domain and RCC1-like domain-containing protein, putative (Fragment) OS=Entamoeba histolytica HM-1:IMSS OX=294381 GN=EHI_030610 PE=4 SV=1	B1N591 (+3)	EHI_030610	20 kDa	0	0	0	0.55132	0.45853	0.74802
Actin, putative OS=Entamoeba histolytica HM-1:IMSS OX=294381 GN=EHI_131230 PE=3 SV=1	C4LXI9 (+1)	EHI_131230	97 kDa	0	0	0	0.55132	1.8341	0.74802
Adenosylhomocysteinase OS=Entamoeba histolytica HM-1:IMSS OX=294381 GN=EHI_068250 PE=3 SV=1	C4LU18 (+2)	EHI_068250	52 kDa	0	0	0	0	0.45853	1.496
Calmodulin, putative OS=Entamoeba histolytica HM-1:IMSS OX=294381 GN=EHI_044820 PE=4 SV=1	C4LTA1 (+1)	EHI_044820	17 kDa	0	0	0	0	0.91705	0.74802
Uncharacterized protein OS=Entamoeba histolytica HM-1:IMSS OX=294381 GN=EHI_129500 PE=4 SV=1	B1N4P8 (+2)	EHI_129500	18 kDa	0	0	0	0	0.45853	0.74802
Protein HIRA OS=Entamoeba histolytica HM-1:IMSS OX=294381 GN=EHI_056440 PE=3 SV=1	C4M6Z3 (+2)	EHI_056440	87 kDa	0	0	0	0.55132	0	0.37401
Proliferating-cell nucleolar antigen p120, putative OS=Entamoeba histolytica HM-1:IMSS OX=294381 GN=EHI_198880 PE=3 SV=1	C4LWT4 (+2)	EHI_198880	55 kDa	0	0	0	1.1026	0	0.74802
Helicase, putative OS=Entamoeba histolytica HM-1:IMSS OX=294381 GN=EHI_053080 PE=4 SV=1	C4M3C6 (+2)	EHI_053080	60 kDa	0	0	0	0	0	0.74802
Uncharacterized protein OS=Entamoeba histolytica HM-1:IMSS OX=294381 GN=EHI_113950 PE=4 SV=1	C4M8W1	EHI_113950	36 kDa	0	0	0	0	0	0
40S ribosomal protein S19, putative OS=Entamoeba histolytica HM-1:IMSS OX=294381 GN=EHI_198740 PE=3 SV=1	C4LWS0 (+2)	EHI_198740	18 kDa	0	0	0	0	0.45853	0
Calreticulin OS=Entamoeba histolytica HM-1:IMSS OX=294381 GN=EHI_136160 PE=3 SV=1	C4M296 (+2)	EHI_136160	45 kDa	0	0	0	0	0	0
Inorganic diphosphatase OS=Entamoeba histolytica HM-1:IMSS OX=294381 GN=EHI_124880 PE=3 SV=1	C4M982 (+2)	EHI_124880	28 kDa	0	0	0	0	0.45853	0.37401
Histone H2B OS=Entamoeba histolytica HM-1:IMSS OX=294381 GN=EHI_182990 PE=3 SV=1	C4LV75	EHI_182990	15 kDa	0	0	0	0	0.45853	0.37401
Calmodulin, putative OS=Entamoeba histolytica HM-1:IMSS OX=294381 GN=EHI_100270 PE=1 SV=1	C4M0U8 (+2)	EHI_100270	17 kDa	0	0	0	0	0.45853	0.37401
WD domain containing protein OS=Entamoeba histolytica HM-1:IMSS OX=294381 GN=EHI_035080 PE=4 SV=1	C4M4Z9 (+2)	EHI_035080	46 kDa	0	0	0	1.1026	0.91705	1.496
Leucine-rich repeat containing protein OS=Entamoeba histolytica HM-1:IMSS OX=294381 GN=EHI_164460 PE=4 SV=1	B1N3D5 (+2)	EHI_164460	83 kDa	4.3497	0	0	0.55132	0	0
Rab family GTPase OS=Entamoeba histolytica HM-1:IMSS OX=294381 GN=EHI_059670 PE=3 SV=1	B1N3J0	EHI_059670	86 kDa	0	0	0	0.55132	0.91705	1.122
Importin beta, putative OS=Entamoeba histolytica HM-1:IMSS OX=294381 GN=EHI_036520 PE=4 SV=1	C4M8F5 (+2)	EHI_036520	95 kDa	0	0	0	0.55132	1.3756	0.74802
HEAT repeat-containing protein 1 OS=Entamoeba histolytica HM-1:IMSS OX=294381 GN=EHI_198890 PE=3 SV=1	C4LWT5 (+2)	EHI_198890	229 kDa	0	0	0	0.55132	0.45853	1.496
Cdc48-like protein, putative OS=Entamoeba histolytica HM-1:IMSS OX=294381 GN=EHI_176970 PE=4 SV=1	C4LY22 (+1)	EHI_176970	86 kDa	0	0	0	0.55132	0.45853	0
Rhodanese domain-containing protein OS=Entamoeba histolytica HM-1:IMSS OX=294381 GN=EHI_031950 PE=4 SV=1	C4MAW5	EHI_031950	68 kDa	0	0	0	0.55132	0.91705	0
Utp12 domain-containing protein OS=Entamoeba histolytica HM-1:IMSS OX=294381 GN=EHI_054840 PE=4 SV=1	C4M2K2 (+2)	EHI_054840	64 kDa	0	0	0	0.55132	0.45853	0.37401
Histone deacetylase, putative OS=Entamoeba histolytica HM-1:IMSS OX=294381 GN=EHI_119320 PE=4 SV=1	A0A8U0WPW0 (+2)	EHI_119320	51 kDa	0	0	0	1.1026	0.45853	0.37401
Rho guanine nucleotide exchange factor, putative OS=Entamoeba histolytica HM-1:IMSS OX=294381 GN=EHI_011390 PE=4 SV=1	C4MAC2 (+2)	EHI_011390	73 kDa	0	0	0	0	0	1.122
Insulin-like growth factor 2 receptor OS=Entamoeba histolytica HM-1:IMSS OX=294381 GN=EHI_161650 PE=4 SV=1	C4MBF6 (+2)	EHI_161650	96 kDa	0	0	0	0.55132	1.3756	0.37401
VASt domain-containing protein OS=Entamoeba histolytica HM-1:IMSS OX=294381 GN=EHI_024350 PE=4 SV=1	C4M0I0 (+2)	EHI_024350	69 kDa	0	0	0	0.55132	0.45853	0
Uncharacterized protein OS=Entamoeba histolytica HM-1:IMSS OX=294381 GN=EHI_197450 PE=4 SV=1	C4LVG1 (+2)	EHI_197450	28 kDa	0	0	0	1.654	0	0.37401
Calmodulin, putative OS=Entamoeba histolytica HM-1:IMSS OX=294381 GN=EHI_117470 PE=4 SV=1	B1N2S2	EHI_117470	9 kDa	0	0	3.0397	1.1026	0.91705	0.74802
Triosephosphate isomerase OS=Entamoeba histolytica HM-1:IMSS OX=294381 GN=EHI_056480 PE=3 SV=1	C4M6Z7 (+2)	EHI_056480	28 kDa	0	0	6.0795	0.55132	0.45853	0
Ribosomal protein L19 OS=Entamoeba histolytica HM-1:IMSS OX=294381 GN=EHI_110340 PE=3 SV=1	C4LU86 (+5)	EHI_110340	23 kDa	0	0	0	0	0	0
4-alpha-glucanotransferase OS=Entamoeba histolytica HM-1:IMSS OX=294381 GN=EHI_084680 PE=3 SV=1	C4M1J9 (+2)	EHI_084680	97 kDa	0	0	0	1.654	0.91705	0.74802
Auxin efflux carrier family protein, putative OS=Entamoeba histolytica HM-1:IMSS OX=294381 GN=EHI_111850 PE=3 SV=1	C4M583 (+2)	EHI_111850	60 kDa	0	0	0	0.55132	0.91705	0.74802
Rab family GTPase OS=Entamoeba histolytica HM-1:IMSS OX=294381 GN=EHI_040310 PE=4 SV=1	A0A8U0WPB0 (+2)	EHI_040310	21 kDa	0	0	0	1.1026	1.3756	1.122
WD_REPEATS_REGION domain-containing protein OS=Entamoeba histolytica HM-1:IMSS OX=294381 GN=EHI_069460 PE=4 SV=1	C4LWN4 (+2)	EHI_069460	80 kDa	0	0	0	0.55132	0	1.122
WW domain-containing protein OS=Entamoeba histolytica HM-1:IMSS OX=294381 GN=EHI_068340 PE=4 SV=1	C4LU27 (+2)	EHI_068340	91 kDa	0	0	0	0.55132	0.45853	1.122
Uncharacterized protein OS=Entamoeba histolytica HM-1:IMSS-B OX=885319 GN=EHI8A_063990 PE=4 SV=1	M3UXH2 (+1)	EHI8A_063990	11 kDa	0	0	0	0	0	0
Uncharacterized protein OS=Entamoeba histolytica HM-1:IMSS OX=294381 GN=EHI_183880 PE=4 SV=1	C4MAW1 (+2)	EHI_183880	28 kDa	0	0	0	0	0	0.37401
Receptor mediated endocytosis protein, putative OS=Entamoeba histolytica HM-1:IMSS OX=294381 GN=EHI_105270 PE=4 SV=1	C4M131	EHI_105270	58 kDa	0	0	0	0	0	0.74802
Grainin, putative OS=Entamoeba histolytica HM-1:IMSS OX=294381 GN=EHI_060380 PE=4 SV=1	C4M6J3 (+2)	EHI_060380	25 kDa	0	0	0	0	0	0
Ribonucloprotein OS=Entamoeba histolytica HM-1:IMSS OX=294381 GN=EHI_104600 PE=3 SV=1	C4LZ69 (+4)	EHI_104600	14 kDa	0	0	0	0	0	1.8701
Ribosome biogenesis regulatory protein OS=Entamoeba histolytica HM-1:IMSS OX=294381 GN=EHI_098810 PE=3 SV=1	C4M883 (+2)	EHI_098810	29 kDa	0	0	0	0	0.45853	0.74802
40S ribosomal protein S23, putative OS=Entamoeba histolytica HM-1:IMSS OX=294381 GN=EHI_020310 PE=3 SV=1	C4M5B7	EHI_020310	16 kDa	0	3.5464	0	0	0	0.37401
Ribosomal protein L15 (Fragment) OS=Entamoeba histolytica HM-1:IMSS-B OX=885319 GN=EHI8A_170770 PE=3 SV=1	M3UM91 (+1)	EHI8A_170770	22 kDa	0	0	0	0.55132	0	0.37401
40S ribosomal protein S25 OS=Entamoeba histolytica HM-1:IMSS OX=294381 GN=EHI_074800 PE=3 SV=1	C4M9F4	EHI_074800	15 kDa	8.6994	0	0	0.55132	0	0.37401
F-box domain-containing protein OS=Entamoeba histolytica HM-1:IMSS OX=294381 GN=EHI_165310 PE=4 SV=1	C4M209 (+2)	EHI_165310	74 kDa	0	0	0	0	0.91705	0.74802
NUC153 domain-containing protein OS=Entamoeba histolytica HM-1:IMSS OX=294381 GN=EHI_097980 PE=3 SV=1	B1N3N6 (+2)	EHI_097980	67 kDa	0	0	0	0.55132	0	1.122
Superoxide dismutase OS=Entamoeba histolytica HM-1:IMSS OX=294381 GN=EHI_159160 PE=3 SV=1	C4LX20	EHI_159160	22 kDa	0	0	0	0	0	0
Guanine nucleotide-binding protein subunit beta 2-like 1, putative OS=Entamoeba histolytica HM-1:IMSS OX=294381 GN=EHI_110400 PE=3 SV=1	C4LU92	EHI_110400	35 kDa	0	0	3.0397	0.55132	0.45853	0
Histone deacetylase HDT1-like OS=Entamoeba histolytica HM-1:IMSS OX=294381 GN=EHI_125630 PE=4 SV=1	C4LVV1 (+2)	EHI_125630	17 kDa	0	0	0	0.55132	0.45853	0.74802
Ras family GTPase OS=Entamoeba histolytica HM-1:IMSS OX=294381 GN=EHI_198330 PE=3 SV=1	C4MA96 (+2)	EHI_198330	23 kDa	0	0	0	1.1026	1.3756	1.496
Venom polypeptide OS=Entamoeba histolytica HM-1:IMSS OX=294381 GN=EHI_188850 PE=4 SV=1	C4M2V2 (+2)	EHI_188850	26 kDa	0	0	0	1.654	1.3756	0
Protein BIG1 OS=Entamoeba histolytica HM-1:IMSS OX=294381 GN=EHI_044360 PE=4 SV=1	C4M783 (+2)	EHI_044360	30 kDa	0	0	0	0	0.45853	0
Syntaxin, putative OS=Entamoeba histolytica HM-1:IMSS OX=294381 GN=EHI_139030 PE=4 SV=1	A0A8U0WNX3 (+2)	EHI_139030	35 kDa	0	0	0	0	0.91705	1.122
Uncharacterized protein OS=Entamoeba histolytica HM-1:IMSS OX=294381 GN=EHI_104580 PE=4 SV=1	C4LZ67 (+2)	EHI_104580	29 kDa	0	0	0	0.55132	0.45853	0.37401
Uncharacterized protein OS=Entamoeba histolytica HM-1:IMSS OX=294381 GN=EHI_194870 PE=4 SV=1	C4M402	EHI_194870	71 kDa	0	0	0	0.55132	0.45853	0
Uncharacterized protein OS=Entamoeba histolytica HM-1:IMSS OX=294381 GN=EHI_035190 PE=4 SV=1	B1N3R8 (+2)	EHI_035190	14 kDa	0	0	0	0.55132	0	0.37401
ATP-binding cassette protein, putative OS=Entamoeba histolytica HM-1:IMSS OX=294381 GN=EHI_178580 PE=4 SV=1	B1N2M5	EHI_178580	154 kDa	0	0	0	0	0.45853	0.74802
Ras GTPase activating protein, putative OS=Entamoeba histolytica HM-1:IMSS OX=294381 GN=EHI_035800 PE=4 SV=1	C4LY07 (+2)	EHI_035800	90 kDa	0	0	0	0.55132	0.45853	0.74802
Utp12 domain-containing protein OS=Entamoeba histolytica HM-1:IMSS OX=294381 GN=EHI_054170 PE=4 SV=1	C4M6U2 (+2)	EHI_054170	64 kDa	0	0	0	0.55132	0.45853	0.37401
WD_REPEATS_REGION domain-containing protein OS=Entamoeba histolytica HM-1:IMSS OX=294381 GN=EHI_017010 PE=4 SV=1	C4MAK3 (+2)	EHI_017010	52 kDa	0	0	0	0.55132	0	1.122
AAA domain-containing protein OS=Entamoeba histolytica HM-1:IMSS-B OX=885319 GN=EHI8A_039970 PE=4 SV=1	M3UZW6	EHI8A_039970	60 kDa	0	0	0	0	0	0.74802
TSNAXIP1_N domain-containing protein OS=Entamoeba histolytica HM-1:IMSS OX=294381 GN=EHI_193460 PE=4 SV=1	C4M4V0 (+2)	EHI_193460	58 kDa	0	0	0	0	0	1.496
Rab family GTPase OS=Entamoeba histolytica HM-1:IMSS OX=294381 GN=EHI_177520 PE=4 SV=1	A0A8U0WPU0	EHI_177520	23 kDa	0	0	3.0397	0	0	0.37401
Alpha-NAC protein, putative OS=Entamoeba histolytica HM-1:IMSS OX=294381 GN=EHI_083250 PE=4 SV=1	C4M758	EHI_083250	24 kDa	4.3497	7.0927	9.1192	0	0	0
Gelsolin repeat protein, putative OS=Entamoeba histolytica HM-1:IMSS OX=294381 GN=EHI_009570 PE=4 SV=1	C4LZ32 (+2)	EHI_009570	169 kDa	0	0	0	1.1026	0	0
Uncharacterized protein OS=Entamoeba histolytica HM-1:IMSS OX=294381 GN=EHI_109990 PE=4 SV=1	C4M3L7 (+2)	EHI_109990	27 kDa	0	0	0	1.1026	0.45853	0.37401
26S protease regulatory subunit 7, putative OS=Entamoeba histolytica HM-1:IMSS OX=294381 GN=EHI_080890 PE=3 SV=1	B1N4Q6 (+2)	EHI_080890	47 kDa	0	0	0	1.1026	0.91705	0
C2 domain containing protein OS=Entamoeba histolytica HM-1:IMSS OX=294381 GN=EHI_118130 PE=3 SV=1	C4LYZ7 (+2)	EHI_118130	42 kDa	0	0	0	0.55132	1.3756	1.8701
Leucine-rich repeat containing protein OS=Entamoeba histolytica HM-1:IMSS OX=294381 GN=EHI_119950 PE=4 SV=1	C4M989 (+2)	EHI_119950	41 kDa	0	0	0	0.55132	0	0.74802
Periplasmic protein OS=Entamoeba histolytica HM-1:IMSS OX=294381 GN=EHI_022970 PE=4 SV=1	C4LUL0 (+2)	EHI_022970	20 kDa	0	0	0	0	1.3756	0.37401
Leucine-rich repeat containing protein OS=Entamoeba histolytica HM-1:IMSS OX=294381 GN=EHI_024640 PE=4 SV=1	C4M0K6 (+2)	EHI_024640	56 kDa	0	0	0	0	0.45853	0.37401
DnaJ family protein OS=Entamoeba histolytica HM-1:IMSS OX=294381 GN=EHI_022950 PE=3 SV=1	C4LUK8 (+2)	EHI_022950	41 kDa	0	0	0	0	0.91705	0.37401
Reverse transcriptase domain-containing protein OS=Entamoeba histolytica HM-1:IMSS OX=294381 GN=EHI_109000 PE=3 SV=1	C4M7E0	EHI_109000	66 kDa	0	0	0	0	0	1.122
Putative rRNA methyltransferase OS=Entamoeba histolytica HM-1:IMSS OX=294381 GN=EHI_088070 PE=3 SV=1	C4M6R5 (+2)	EHI_088070	96 kDa	0	0	0	0	0	0
Actophorin, putative OS=Entamoeba histolytica HM-1:IMSS OX=294381 GN=EHI_197480 PE=3 SV=1	C4LVG4 (+2)	EHI_197480	16 kDa	0	3.5464	6.0795	1.1026	0	0
NAC-A/B domain-containing protein OS=Entamoeba histolytica HM-1:IMSS OX=294381 GN=EHI_048560 PE=4 SV=1	C4M2W9 (+2)	EHI_048560	19 kDa	0	0	0	0.55132	0.45853	0.37401
60S ribosomal protein L10a, putative OS=Entamoeba histolytica HM-1:IMSS OX=294381 GN=EHI_012480 PE=3 SV=1	B1N2I7	EHI_012480	24 kDa	0	0	0	0	0	0
Eukaryotic translation initiation factor 6 OS=Entamoeba histolytica HM-1:IMSS OX=294381 GN=EIF6 PE=3 SV=1	C4M2Q1 (+2)	EIF6	26 kDa	0	0	0	1.1026	0.91705	0.74802
Axoneme-associated protein mst101 OS=Entamoeba histolytica HM-1:IMSS OX=294381 GN=EHI_049670 PE=4 SV=1	C4LUG8 (+2)	EHI_049670	94 kDa	0	0	0	1.1026	1.3756	0
MIB/HERC2 domain-containing protein OS=Entamoeba histolytica HM-1:IMSS OX=294381 GN=EHI_181140 PE=4 SV=1	C4M602 (+2)	EHI_181140	25 kDa	0	0	0	1.1026	0.91705	0.74802
DNA double-strand break repair Rad50 ATPase OS=Entamoeba histolytica HM-1:IMSS OX=294381 GN=EHI_008630 PE=4 SV=1	C4M0M7 (+2)	EHI_008630	69 kDa	0	0	0	0	0.45853	0
HEAT repeat domain containing protein OS=Entamoeba histolytica HM-1:IMSS OX=294381 GN=EHI_050150 PE=4 SV=1	C4LTQ2	EHI_050150	78 kDa	0	0	0	1.1026	1.3756	0.74802
Serine/threonine-protein kinase PLK OS=Entamoeba histolytica HM-1:IMSS OX=294381 GN=EHI_008410 PE=3 SV=1	C4M0L7 (+2)	EHI_008410	62 kDa	0	0	0	0	0	0.37401
Importin beta-3 family protein, putative OS=Entamoeba histolytica HM-1:IMSS OX=294381 GN=EHI_098400 PE=4 SV=1	C4LXC2 (+2)	EHI_098400	126 kDa	0	0	0	0.55132	1.3756	1.496
Cullin, putative OS=Entamoeba histolytica HM-1:IMSS OX=294381 GN=EHI_118180 PE=3 SV=1	C4LZ01 (+2)	EHI_118180	87 kDa	0	0	0	0.55132	0	1.496
Transmembrane protein OS=Entamoeba histolytica HM-1:IMSS OX=294381 GN=EHI_069270 PE=4 SV=1	C4LWL5 (+1)	EHI_069270	57 kDa	0	0	0	1.1026	0	1.496
Folliculin domain-containing protein OS=Entamoeba histolytica HM-1:IMSS OX=294381 GN=EHI_110430 PE=4 SV=1	C4LU95 (+2)	EHI_110430	103 kDa	0	0	0	0	0	1.122
Nucleolar GTP-binding protein 2 OS=Entamoeba histolytica HM-1:IMSS OX=294381 GN=EHI_164370 PE=3 SV=1	C4M1R9 (+1)	EHI_164370	71 kDa	0	0	0	0	0	1.496
Actin-binding protein, cofilin/tropomyosin family OS=Entamoeba histolytica HM-1:IMSS OX=294381 GN=EHI_186840 PE=4 SV=1	C4LVQ1 (+2)	EHI_186840	16 kDa	0	7.0927	3.0397	0	0.45853	0.37401
Uncharacterized protein OS=Entamoeba histolytica HM-1:IMSS OX=294381 GN=EHI_099720 PE=4 SV=1	C4M6H5	EHI_099720	14 kDa	0	0	0	0	0	0
Serine-rich protein OS=Entamoeba histolytica HM-1:IMSS OX=294381 GN=EHI_116360 PE=4 SV=1	C4MBR8	EHI_116360	25 kDa	4.3497	3.5464	0	0.55132	0.45853	0
TLDc domain-containing protein OS=Entamoeba histolytica HM-1:IMSS OX=294381 GN=EHI_161020 PE=4 SV=1	C4M2R9 (+2)	EHI_161020	46 kDa	0	0	0	1.1026	0.91705	0.37401
FHA domain-containing protein OS=Entamoeba histolytica HM-1:IMSS OX=294381 GN=EHI_149010 PE=4 SV=1	C4LT67 (+2)	EHI_149010	26 kDa	0	0	0	0	0.45853	1.122
EF-hand calcium-binding domain containing protein OS=Entamoeba histolytica HM-1:IMSS OX=294381 GN=EHI_197510 PE=4 SV=1	C4LVG7 (+2)	EHI_197510	30 kDa	0	0	0	0	0	0
Ubiquitin-like protein OS=Entamoeba histolytica HM-1:IMSS OX=294381 GN=EHI_170060 PE=4 SV=1	C4M1C8 (+2)	EHI_170060	13 kDa	0	0	0	0.55132	0.45853	0.74802
Uncharacterized protein OS=Entamoeba histolytica HM-1:IMSS OX=294381 GN=EHI_164800 PE=4 SV=1	C4M1X3 (+2)	EHI_164800	101 kDa	0	0	0	1.1026	0.91705	0.74802
High-affinity potassium uptake transporter, putative OS=Entamoeba histolytica HM-1:IMSS OX=294381 GN=EHI_199020 PE=4 SV=1	C4LWU8 (+2)	EHI_199020	83 kDa	0	0	0	1.1026	0.45853	0.74802
SH3 domain-containing protein OS=Entamoeba histolytica HM-1:IMSS OX=294381 GN=EHI_054800 PE=4 SV=1	C4M2J9 (+2)	EHI_054800	55 kDa	0	0	0	0	0	0.37401
Multidrug resistance protein, putative OS=Entamoeba histolytica HM-1:IMSS OX=294381 GN=EHI_100320 PE=4 SV=1	C4M0V2 (+2)	EHI_100320	182 kDa	0	0	0	0	0.45853	0.74802
Ribosome production factor 2 homolog OS=Entamoeba histolytica HM-1:IMSS OX=294381 GN=EHI_029200 PE=3 SV=1	C4MAW7	EHI_029200	34 kDa	0	0	0	0.55132	0	1.496
40S ribosomal protein S27 OS=Entamoeba histolytica HM-1:IMSS OX=294381 GN=EHI_149000 PE=3 SV=1	C4LT66 (+1)	EHI_149000	9 kDa	0	0	0	0.55132	0.45853	0
40S ribosomal protein S21 OS=Entamoeba histolytica HM-1:IMSS OX=294381 GN=EHI_126870 PE=3 SV=1	C4LWW3 (+2)	EHI_126870	10 kDa	8.6994	7.0927	6.0795	0	0	0
LIM zinc finger domain containing protein OS=Entamoeba histolytica HM-1:IMSS OX=294381 GN=EHI_096420 PE=4 SV=1	C4LWF5 (+2)	EHI_096420	16 kDa	0	3.5464	0	0	0	0
Rab family GTPase OS=Entamoeba histolytica HM-1:IMSS OX=294381 GN=EHI_108610 PE=4 SV=1	A0A8U0WPG2 (+1)	EHI_108610	23 kDa	0	0	0	0	0	0
Clathrin coat assembly protein, putative OS=Entamoeba histolytica HM-1:IMSS OX=294381 GN=EHI_135430 PE=4 SV=1	A0A8U0WQ23 (+1)	EHI_135430	46 kDa	0	0	0	0.55132	0	0
Cysteine desulfurase, putative OS=Entamoeba histolytica HM-1:IMSS OX=294381 GN=EHI_136380 PE=4 SV=1	A0A8U0WPM8 (+2)	EHI_136380	43 kDa	0	7.0927	0	0	0	0
Uncharacterized protein OS=Entamoeba histolytica HM-1:IMSS OX=294381 GN=EHI_059830 PE=4 SV=1	C4M342 (+2)	EHI_059830	99 kDa	0	0	0	0.55132	0.45853	0.37401
UEV domain-containing protein OS=Entamoeba histolytica HM-1:IMSS OX=294381 GN=EHI_135460 PE=4 SV=1	C4M9S4 (+2)	EHI_135460	56 kDa	0	0	0	0	0.91705	0.74802
20 kDa antigen, putative OS=Entamoeba histolytica HM-1:IMSS OX=294381 GN=EHI_056490 PE=4 SV=1	C4M6Y3 (+2)	EHI_056490	21 kDa	0	0	0	0	0	0
MSC domain-containing protein OS=Entamoeba histolytica HM-1:IMSS OX=294381 GN=EHI_124620 PE=4 SV=1	C4LZJ6 (+2)	EHI_124620	187 kDa	0	0	0	0	0.91705	0.74802
Tho2 domain-containing protein OS=Entamoeba histolytica HM-1:IMSS OX=294381 GN=EHI_052850 PE=4 SV=1	C4M3S4 (+2)	EHI_052850	87 kDa	0	0	0	0.55132	0	0
PHR domain-containing protein OS=Entamoeba histolytica HM-1:IMSS OX=294381 GN=EHI_109980 PE=4 SV=1	C4M3L6 (+2)	EHI_109980	79 kDa	0	0	0	0	0.91705	1.496
Receptor protein serine/threonine kinase OS=Entamoeba histolytica HM-1:IMSS OX=294381 GN=EHI_174100 PE=3 SV=1	C4M258 (+2)	EHI_174100	76 kDa	0	0	0	0.55132	0	0.74802
Tyrosine kinase, putative OS=Entamoeba histolytica HM-1:IMSS-B OX=885319 GN=EHI8A_044120 PE=4 SV=1	M3TMB9	EHI8A_044120	138 kDa	0	0	0	0	0.91705	1.122
Brix domain containing protein OS=Entamoeba histolytica HM-1:IMSS OX=294381 GN=EHI_012190 PE=4 SV=1	C4LTL2 (+1)	EHI_012190	41 kDa	0	0	0	0	0	0.37401
Uncharacterized protein OS=Entamoeba histolytica HM-1:IMSS OX=294381 GN=EHI_041070 PE=4 SV=1	C4MAD2 (+1)	EHI_041070	53 kDa	0	0	0	1.1026	0.45853	0.74802
WW domain-containing protein OS=Entamoeba histolytica HM-1:IMSS OX=294381 GN=EHI_011550 PE=4 SV=1	C4M9J1 (+2)	EHI_011550	70 kDa	0	0	0	1.1026	0	0.37401
ATP-dependent RNA helicase OS=Entamoeba histolytica HM-1:IMSS OX=294381 GN=EHI_069410 PE=3 SV=1	C4LWM9 (+2)	EHI_069410	79 kDa	0	0	0	0	0	0.74802
60S ribosomal protein L31, putative OS=Entamoeba histolytica HM-1:IMSS OX=294381 GN=EHI_068200 PE=3 SV=1	C4LU13 (+2)	EHI_068200	17 kDa	4.3497	3.5464	0	0	0	0
LIM zinc finger domain containing protein OS=Entamoeba histolytica HM-1:IMSS OX=294381 GN=EHI_194520 PE=4 SV=1	C4LZW4 (+2)	EHI_194520	16 kDa	0	0	0	1.1026	1.3756	0
TLDc domain-containing protein OS=Entamoeba histolytica HM-1:IMSS OX=294381 GN=EHI_201420 PE=4 SV=1	B1N569	EHI_201420	41 kDa	0	0	0	0	0	0
DEAD/DEAH box helicase, putative OS=Entamoeba histolytica HM-1:IMSS OX=294381 GN=EHI_093900 PE=3 SV=1	C4LYI1 (+2)	EHI_093900	44 kDa	0	0	0	0	0	0
EF-hand calcium-binding domain containing protein OS=Entamoeba histolytica HM-1:IMSS OX=294381 GN=EHI_148810 PE=4 SV=1	B1N2G5 (+2)	EHI_148810	35 kDa	0	0	0	1.1026	0.45853	0.74802
Flagellar hook-length control protein FliK OS=Entamoeba histolytica HM-1:IMSS OX=294381 GN=EHI_138350 PE=4 SV=1	C4M3H7 (+2)	EHI_138350	19 kDa	0	0	0	0.55132	0	0.74802
Nucleoside transporter, putative OS=Entamoeba histolytica HM-1:IMSS OX=294381 GN=EHI_110730 PE=3 SV=1	C4LUC0 (+2)	EHI_110730	56 kDa	0	0	0	0.55132	1.3756	0.74802
DEAD/DEAH box helicase, putative OS=Entamoeba histolytica HM-1:IMSS OX=294381 GN=EHI_078560 PE=4 SV=1	C4M4E5 (+2)	EHI_078560	63 kDa	0	0	0	0	0	1.122
Dipeptidyl-peptidase, putative OS=Entamoeba histolytica HM-1:IMSS OX=294381 GN=EHI_182720 PE=4 SV=1	C4LV53 (+2)	EHI_182720	76 kDa	0	0	0	0	1.3756	0.74802
Rab GTPase activating protein, putative OS=Entamoeba histolytica HM-1:IMSS OX=294381 GN=EHI_165290 PE=4 SV=1	C4M207 (+2)	EHI_165290	73 kDa	0	0	0	0.55132	0.45853	0.37401
BRCT domain-containing protein OS=Entamoeba histolytica HM-1:IMSS OX=294381 GN=EHI_053100 PE=4 SV=1	C4M3C8 (+2)	EHI_053100	103 kDa	0	0	0	0.55132	0	0
Villidin, putative OS=Entamoeba histolytica HM-1:IMSS OX=294381 GN=EHI_150430 PE=4 SV=1	C4M224 (+2)	EHI_150430	195 kDa	0	0	0	0	0.45853	0.37401
Protein kinase, putative OS=Entamoeba histolytica HM-1:IMSS OX=294381 GN=EHI_011510 PE=4 SV=1	C4M9I7 (+2)	EHI_011510	48 kDa	0	0	0	0.55132	0	0.37401
DNA-directed RNA polymerase subunit beta OS=Entamoeba histolytica HM-1:IMSS OX=294381 GN=EHI_022940 PE=3 SV=1	C4LUK7 (+2)	EHI_022940	132 kDa	0	0	0	0	0	0.37401
Thioredoxin domain-containing protein OS=Entamoeba histolytica HM-1:IMSS OX=294381 GN=EHI_018950 PE=4 SV=1	B1N4T1	EHI_018950	83 kDa	0	0	0	0	0	0
Rho family GTPase OS=Entamoeba histolytica HM-1:IMSS OX=294381 GN=EHI_181250 PE=3 SV=1	C4M5Z7 (+5)	EHI_181250	22 kDa	0	0	0	0	0	0.74802
WD domain containing protein OS=Entamoeba histolytica HM-1:IMSS OX=294381 GN=EHI_103620 PE=3 SV=1	C4LVK6 (+2)	EHI_103620	45 kDa	0	0	0	1.1026	0.45853	0.37401
AIG1 family protein, putative OS=Entamoeba histolytica HM-1:IMSS OX=294381 GN=EHI_180390 PE=4 SV=1	C4M288 (+2)	EHI_180390	39 kDa	0	0	0	0.55132	0.45853	0.37401
Actin-related protein 2/3 complex subunit 5 OS=Entamoeba histolytica HM-1:IMSS OX=294381 GN=EHI_103440 PE=3 SV=1	B1N2Q5 (+2)	EHI_103440	15 kDa	0	0	0	1.1026	0.91705	0
Adaptor protein (AP) family protein OS=Entamoeba histolytica HM-1:IMSS OX=294381 GN=EHI_023600 PE=4 SV=1	A0A8U0WPZ3 (+2)	EHI_023600	81 kDa	0	0	0	0.55132	0	0
Axoneme-associated protein mst101(2)-like OS=Entamoeba histolytica HM-1:IMSS OX=294381 GN=EHI_096360 PE=4 SV=1	C4LWE9 (+2)	EHI_096360	51 kDa	0	0	0	1.1026	0.91705	0.37401
T-complex protein 1 subunit delta OS=Entamoeba histolytica HM-1:IMSS OX=294381 GN=EHI_114120 PE=3 SV=1	C4M419 (+1)	EHI_114120	58 kDa	0	0	0	0.55132	0.91705	0
Ribosomal protein L1 OS=Entamoeba histolytica HM-1:IMSS-B OX=885319 GN=EHI8A_208740 PE=4 SV=1	M3TSU2 (+1)	EHI8A_208740	33 kDa	0	0	0	0.55132	0	0
NPL domain-containing protein OS=Entamoeba histolytica HM-1:IMSS OX=294381 GN=EHI_178460 PE=4 SV=1	C4LUR2 (+2)	EHI_178460	22 kDa	0	0	0	1.654	0	0.74802
Myosin-2 heavy chain, putative OS=Entamoeba histolytica HM-1:IMSS OX=294381 GN=EHI_014010 PE=4 SV=1	B1N2X4 (+1)	EHI_014010	82 kDa	0	0	0	0.55132	0.45853	0.37401
DNA double-strand break repair Rad50 ATPase OS=Entamoeba histolytica HM-1:IMSS OX=294381 GN=EHI_133540 PE=4 SV=1	C4M1L8 (+2)	EHI_133540	74 kDa	0	0	0	0.55132	0.91705	0
Rab family GTPase OS=Entamoeba histolytica HM-1:IMSS OX=294381 GN=EHI_127380 PE=4 SV=1	A0A8U0WQ04 (+2)	EHI_127380	23 kDa	0	0	0	0.55132	0.91705	0.37401
26S protease regulatory subunit, putative OS=Entamoeba histolytica HM-1:IMSS OX=294381 GN=EHI_185410 PE=3 SV=1	C4M8D7 (+1)	EHI_185410	45 kDa	0	0	0	0.55132	0.91705	0.37401
Secreted protein (Fragment) OS=Entamoeba histolytica HM-1:IMSS OX=294381 GN=EHI_089000 PE=4 SV=1	B1N589	EHI_089000	54 kDa	0	0	0	0	0.45853	0
Lipase_3 domain-containing protein OS=Entamoeba histolytica HM-1:IMSS OX=294381 GN=EHI_032470 PE=4 SV=1	C4MB72	EHI_032470	95 kDa	0	0	0	1.654	0	0.37401
Uncharacterized protein OS=Entamoeba histolytica HM-1:IMSS OX=294381 GN=EHI_017750 PE=4 SV=1	C4M3F8 (+1)	EHI_017750	21 kDa	0	0	0	0.55132	0.45853	0
Alcohol dehydrogenase, putative OS=Entamoeba histolytica HM-1:IMSS OX=294381 GN=EHI_125950 PE=3 SV=1	C4LVY0 (+2)	EHI_125950	42 kDa	0	0	0	0.55132	0.91705	0
MIR domain protein OS=Entamoeba histolytica HM-1:IMSS OX=294381 GN=EHI_100480 PE=4 SV=1	C4M0T6 (+2)	EHI_100480	23 kDa	0	0	0	0	0.45853	0.37401
Uncharacterized protein OS=Entamoeba histolytica HM-1:IMSS OX=294381 GN=EHI_134980 PE=4 SV=1	C4M0Y5 (+2)	EHI_134980	97 kDa	0	0	0	0.55132	0	0.74802
DNA double-strand break repair Rad50 ATPase OS=Entamoeba histolytica HM-1:IMSS OX=294381 GN=EHI_186800 PE=4 SV=1	C4LVP7 (+2)	EHI_186800	109 kDa	0	0	0	0	0	0
Tho2 domain-containing protein OS=Entamoeba histolytica HM-1:IMSS OX=294381 GN=EHI_185590 PE=4 SV=1	C4M8D0 (+2)	EHI_185590	117 kDa	0	0	0	0	0	0.74802
Guanylate-binding protein, putative OS=Entamoeba histolytica HM-1:IMSS OX=294381 GN=EHI_093930 PE=4 SV=1	C4LYI4 (+2)	EHI_093930	88 kDa	0	0	0	0	1.3756	2.6181
Pore-forming peptide ameobapore A, putative OS=Entamoeba histolytica HM-1:IMSS OX=294381 GN=EHI_159480 PE=4 SV=1	C4LX30 (+2)	EHI_159480	11 kDa	0	0	0	0	0.45853	0
40S ribosomal protein S15, putative OS=Entamoeba histolytica HM-1:IMSS OX=294381 GN=EHI_064570 PE=3 SV=1	C4M0C6 (+5)	EHI_064570	16 kDa	0	0	0	0	0	0
Aminoacyl-histidine dipeptidase, putative OS=Entamoeba histolytica HM-1:IMSS OX=294381 GN=EHI_042170 PE=4 SV=1	C4M4H1 (+2)	EHI_042170	57 kDa	0	3.5464	0	0	0	0
DUF1899 domain-containing protein OS=Entamoeba histolytica HM-1:IMSS OX=294381 GN=EHI_170130 PE=4 SV=1	C4M1D5 (+2)	EHI_170130	13 kDa	0	0	0	0.55132	0.45853	0.74802
Uncharacterized protein OS=Entamoeba histolytica HM-1:IMSS OX=294381 GN=EHI_052720 PE=4 SV=1	B1N3L4 (+2)	EHI_052720	23 kDa	0	0	0	0.55132	0.91705	0.74802
Uncharacterized protein OS=Entamoeba histolytica HM-1:IMSS OX=294381 GN=EHI_035510 PE=4 SV=1	C4LXY2 (+2)	EHI_035510	29 kDa	0	0	0	1.654	1.3756	1.122
RNA recognition motif domain containing protein OS=Entamoeba histolytica HM-1:IMSS OX=294381 GN=EHI_009470 PE=4 SV=1	C4LZ24 (+2)	EHI_009470	20 kDa	0	0	0	0	0	0.74802
Vacuolar sorting protein VPS4, putative OS=Entamoeba histolytica HM-1:IMSS OX=294381 GN=EHI_118900 PE=3 SV=1	C4LYN8 (+2)	EHI_118900	47 kDa	0	0	0	0.55132	0.45853	0.74802
Rho family GTPase OS=Entamoeba histolytica HM-1:IMSS OX=294381 GN=EHI_015440 PE=3 SV=1	C4M0Y0 (+1)	EHI_015440	24 kDa	0	0	0	1.1026	0.45853	0
AIG1 family protein, putative (Fragment) OS=Entamoeba histolytica HM-1:IMSS OX=294381 GN=EHI_109120 PE=4 SV=1	B1N607	EHI_109120	23 kDa	0	0	0	0.55132	0.45853	0.37401
PX domain-containing protein OS=Entamoeba histolytica HM-1:IMSS OX=294381 GN=EHI_131140 PE=4 SV=1	C4LXI2 (+2)	EHI_131140	100 kDa	0	0	0	0.55132	0.45853	0.37401
Cell division control protein, putative OS=Entamoeba histolytica HM-1:IMSS OX=294381 GN=EHI_105300 PE=3 SV=1	C4M134 (+2)	EHI_105300	36 kDa	0	0	0	0	0.45853	0.37401
Adaptor protein (AP) family protein OS=Entamoeba histolytica HM-1:IMSS OX=294381 GN=EHI_013040 PE=3 SV=1	B1N2V8 (+2)	EHI_013040	123 kDa	0	0	0	0.55132	0.91705	0.37401
26S protease regulatory subunit, putative OS=Entamoeba histolytica HM-1:IMSS OX=294381 GN=EHI_053020 PE=3 SV=1	C4M3C0 (+2)	EHI_053020	47 kDa	0	0	0	0.55132	0	0.37401
DUF148 domain-containing protein OS=Entamoeba histolytica HM-1:IMSS OX=294381 GN=EHI_025890 PE=4 SV=1	B1N4D8 (+2)	EHI_025890	26 kDa	0	0	0	0	1.8341	1.496
Glycogen debranching enzyme, putative OS=Entamoeba histolytica HM-1:IMSS OX=294381 GN=EHI_098360 PE=4 SV=1	C4LXB9 (+2)	EHI_098360	166 kDa	0	0	0	0	0.45853	0
Helicase ATP-binding domain-containing protein OS=Entamoeba histolytica HM-1:IMSS OX=294381 GN=EHI_130890 PE=4 SV=1	C4LXF7 (+2)	EHI_130890	112 kDa	0	0	0	0	0.45853	0.74802
CG10680 protein (Fragment) OS=Entamoeba histolytica HM-1:IMSS-B OX=885319 GN=EHI8A_153800 PE=4 SV=1	M3ULN4	EHI8A_153800	13 kDa	0	0	0	1.654	0	0
Sporozoite surface protein 2-like OS=Entamoeba histolytica HM-1:IMSS OX=294381 GN=EHI_178970 PE=4 SV=1	C4LUW0	EHI_178970	57 kDa	0	0	0	1.1026	0	0.37401
5'-3' exoribonuclease OS=Entamoeba histolytica HM-1:IMSS OX=294381 GN=EHI_128220 PE=3 SV=1	B1N3S5	EHI_128220	102 kDa	0	0	0	0	0	0.37401
Histone H3, putative OS=Entamoeba histolytica HM-1:IMSS OX=294381 GN=EHI_096650 PE=3 SV=1	C4LWH7 (+2)	EHI_096650	16 kDa	0	0	0	0	0	0
TolA-like protein, putative OS=Entamoeba histolytica HM-1:IMSS OX=294381 GN=EHI_052780 PE=4 SV=1	C4M3R7 (+1)	EHI_052780	38 kDa	0	0	3.0397	0	0	0
RPW8 domain-containing protein OS=Entamoeba histolytica HM-1:IMSS OX=294381 GN=EHI_136410 PE=4 SV=1	C4M2B0 (+2)	EHI_136410	35 kDa	0	0	0	0.55132	1.3756	0.37401
Hyphal_reg_CWP domain-containing protein OS=Entamoeba histolytica HM-1:IMSS OX=294381 GN=EHI_151580 PE=4 SV=1	C4LSJ9 (+2)	EHI_151580	49 kDa	0	0	0	0	0.45853	1.496
Transmembrane protein OS=Entamoeba histolytica HM-1:IMSS OX=294381 GN=EHI_008120 PE=4 SV=1	C4LYE6 (+2)	EHI_008120	37 kDa	0	0	0	0	0.45853	0.37401
DNA double-strand break repair Rad50 ATPase OS=Entamoeba histolytica HM-1:IMSS OX=294381 GN=EHI_058110 PE=4 SV=1	C4M8B2 (+2)	EHI_058110	71 kDa	0	0	0	0.55132	0.45853	0.37401
Uncharacterized protein OS=Entamoeba histolytica HM-1:IMSS-B OX=885319 GN=EHI8A_080480 PE=4 SV=1	M3S8Z8	EHI8A_080480	41 kDa	0	0	0	0	0	0.74802
Sjogrens syndrome scleroderma autoantigen 1 OS=Entamoeba histolytica HM-1:IMSS OX=294381 GN=EHI_006840 PE=4 SV=1	C4M0F7 (+2)	EHI_006840	26 kDa	0	0	0	1.1026	0.45853	0
DUF4047 domain-containing protein OS=Entamoeba histolytica HM-1:IMSS OX=294381 GN=EHI_093740 PE=4 SV=1	C4LYG5 (+2)	EHI_093740	37 kDa	0	0	0	1.1026	0.45853	0
Rho guanine nucleotide exchange factor, putative OS=Entamoeba histolytica HM-1:IMSS-A OX=885318 GN=EHI7A_017670 PE=4 SV=1	N9TNQ0	EHI7A_017670	62 kDa	0	0	0	0	0	0
NUC173 domain-containing protein OS=Entamoeba histolytica HM-1:IMSS OX=294381 GN=EHI_030450 PE=3 SV=1	C4M457 (+2)	EHI_030450	107 kDa	0	0	0	0	0	1.122
Midasin OS=Entamoeba histolytica HM-1:IMSS OX=294381 GN=EHI_153780 PE=3 SV=1	C4LSF8 (+1)	EHI_153780	520 kDa	0	0	0	0	0	1.122
Zonadhesin OS=Entamoeba histolytica HM-1:IMSS OX=294381 GN=EHI_178820 PE=4 SV=1	C4LUU6	EHI_178820	64 kDa	0	0	0	0	0	0
Eukaryotic translation initiation factor 5A OS=Entamoeba histolytica HM-1:IMSS OX=294381 GN=EHI_186480 PE=3 SV=1	C4LVN8	EHI_186480	17 kDa	0	3.5464	0	0	0	0
Glutenin, low molecular weight subunit OS=Entamoeba histolytica HM-1:IMSS OX=294381 GN=EHI_197520 PE=4 SV=1	C4LVG8 (+2)	EHI_197520	45 kDa	0	0	0	1.1026	0.45853	0.37401
Ribosome biogenesis protein, putative OS=Entamoeba histolytica HM-1:IMSS OX=294381 GN=EHI_175090 PE=3 SV=1	C4LZN4 (+2)	EHI_175090	34 kDa	0	0	0	0	0	0.74802
Secreted protein OS=Entamoeba histolytica HM-1:IMSS OX=294381 GN=EHI_110000 PE=4 SV=1	C4M3L8	EHI_110000	24 kDa	0	0	0	0.55132	0.45853	1.122
DNA double-strand break repair Rad50 ATPase OS=Entamoeba histolytica HM-1:IMSS OX=294381 GN=EHI_086030 PE=4 SV=1	C4M358 (+2)	EHI_086030	75 kDa	0	0	0	0	0	0
DEAD/DEAH box helicase, putative OS=Entamoeba histolytica HM-1:IMSS OX=294381 GN=EHI_036900 PE=4 SV=1	C4M9V7 (+2)	EHI_036900	48 kDa	0	0	0	0.55132	1.3756	0.37401
Nucleosome assembly protein, putative OS=Entamoeba histolytica HM-1:IMSS OX=294381 GN=EHI_120340 PE=3 SV=1	C4M8H9 (+2)	EHI_120340	31 kDa	4.3497	0	3.0397	0	0	0
Phosphoglycerate mutase (2,3-diphosphoglycerate-independent) OS=Entamoeba histolytica HM-1:IMSS OX=294381 GN=EHI_050940 PE=3 SV=1	C4LTW4 (+2)	EHI_050940	62 kDa	0	0	0	1.1026	0	0
Uncharacterized protein OS=Entamoeba histolytica HM-1:IMSS OX=294381 GN=EHI_067260 PE=4 SV=1	C4MA84 (+1)	EHI_067260	47 kDa	0	0	0	0	0.45853	0
Uncharacterized protein OS=Entamoeba histolytica HM-1:IMSS OX=294381 GN=EHI_092230 PE=4 SV=1	C4LUY8 (+2)	EHI_092230	34 kDa	0	0	0	0	0	0.37401
Glutamic acid-rich protein OS=Entamoeba histolytica HM-1:IMSS OX=294381 GN=EHI_183160 PE=4 SV=1	C4LV89 (+1)	EHI_183160	32 kDa	0	0	0	0.55132	0	0
Saposin B-type domain-containing protein OS=Entamoeba histolytica HM-1:IMSS OX=294381 GN=EHI_146810 PE=4 SV=1	C4MB36 (+2)	EHI_146810	77 kDa	0	0	0	0.55132	1.3756	0
rRNA-processing protein efg1 OS=Entamoeba histolytica HM-1:IMSS OX=294381 GN=EHI_088060 PE=4 SV=1	B1N405 (+2)	EHI_088060	19 kDa	0	0	0	0	0	0
Transcription factor BTF3, putative OS=Entamoeba histolytica HM-1:IMSS OX=294381 GN=EHI_198870 PE=4 SV=1	C4LWT3 (+2)	EHI_198870	19 kDa	0	0	0	0	0	0
Uncharacterized protein OS=Entamoeba histolytica HM-1:IMSS OX=294381 GN=EHI_075200 PE=4 SV=1	B1N4P2 (+2)	EHI_075200	28 kDa	0	0	0	0.55132	0.45853	0.37401
60S acidic ribosomal protein P2, putative OS=Entamoeba histolytica HM-1:IMSS OX=294381 GN=EHI_138770 PE=3 SV=1	C4M4I3 (+2)	EHI_138770	11 kDa	4.3497	0	6.0795	0	0	0
TLDc domain-containing protein OS=Entamoeba histolytica HM-1:IMSS OX=294381 GN=EHI_110780 PE=4 SV=1	C4LUC5 (+2)	EHI_110780	51 kDa	0	0	0	0	0.45853	0.74802
Transmembrane protein OS=Entamoeba histolytica HM-1:IMSS OX=294381 GN=EHI_153160 PE=4 SV=1	C4LSA8 (+2)	EHI_153160	68 kDa	0	0	0	0	1.3756	0.74802
Receptor protein kinase, putative OS=Entamoeba histolytica HM-1:IMSS OX=294381 GN=EHI_037140 PE=4 SV=1	C4M7N9 (+2)	EHI_037140	129 kDa	0	0	0	0	0.91705	0.74802
Spc7 domain-containing protein OS=Entamoeba histolytica HM-1:IMSS OX=294381 GN=EHI_023320 PE=4 SV=1	C4LUP3 (+2)	EHI_023320	120 kDa	0	0	0	0	0	0
AIG1-type G domain-containing protein OS=Entamoeba histolytica HM-1:IMSS OX=294381 GN=EHI_165770 PE=4 SV=1	C4MBF1 (+2)	EHI_165770	23 kDa	0	0	0	0.55132	0.45853	0.37401
Uncharacterized protein OS=Entamoeba histolytica HM-1:IMSS OX=294381 GN=EHI_107090 PE=4 SV=1	C4M150 (+2)	EHI_107090	29 kDa	0	0	0	0.55132	0.45853	0.37401
LisH domain-containing protein OS=Entamoeba histolytica HM-1:IMSS OX=294381 GN=EHI_152870 PE=4 SV=1	B1N2G1 (+2)	EHI_152870	32 kDa	0	0	0	0.55132	0	0.74802
VWFA domain-containing protein OS=Entamoeba histolytica HM-1:IMSS OX=294381 GN=EHI_096790 PE=4 SV=1	C4LWI9 (+2)	EHI_096790	29 kDa	0	0	0	0	0	0
Coiled-coil domain-containing protein OS=Entamoeba histolytica HM-1:IMSS OX=294381 GN=EHI_104730 PE=4 SV=1	C4LZ81 (+2)	EHI_104730	66 kDa	0	0	0	0.55132	0.45853	0.74802
Molybdopterin cofactor sulfurase, putative OS=Entamoeba histolytica HM-1:IMSS OX=294381 GN=EHI_027700 PE=4 SV=1	C4M1V6 (+2)	EHI_027700	53 kDa	0	0	0	0.55132	0.45853	0.74802
Pept_C1 domain-containing protein OS=Entamoeba histolytica HM-1:IMSS OX=294381 GN=EHI_010340 PE=4 SV=1	C4LYT1	EHI_010340	64 kDa	0	0	0	0.55132	0.91705	1.122
Uncharacterized protein OS=Entamoeba histolytica HM-1:IMSS OX=294381 GN=EHI_087870 PE=4 SV=1	C4LXW6 (+2)	EHI_087870	42 kDa	0	0	0	0	0.91705	0.37401
F-BAR domain-containing protein OS=Entamoeba histolytica HM-1:IMSS OX=294381 GN=EHI_105210 PE=4 SV=1	C4M126 (+2)	EHI_105210	38 kDa	0	0	0	0	0	0
H/ACA ribonucleoprotein complex subunit OS=Entamoeba histolytica HM-1:IMSS OX=294381 GN=EHI_194040 PE=3 SV=1	C4LZT0	EHI_194040	19 kDa	0	0	0	0	0	0.74802
HMG box domain-containing protein OS=Entamoeba histolytica HM-1:IMSS OX=294381 GN=EHI_016350 PE=4 SV=1	C4M3V7 (+2)	EHI_016350	38 kDa	13.049	0	3.0397	0	0	0
HEAT repeat domain containing protein OS=Entamoeba histolytica HM-1:IMSS OX=294381 GN=EHI_118620 PE=4 SV=1	C4LYL2 (+2)	EHI_118620	181 kDa	0	0	0	0	0.45853	0.74802
SNF7 family protein OS=Entamoeba histolytica HM-1:IMSS OX=294381 GN=EHI_114790 PE=4 SV=1	C4M7T5 (+2)	EHI_114790	24 kDa	0	0	0	0.55132	0.91705	0.37401
Dipeptidyl-peptidase, putative OS=Entamoeba histolytica HM-1:IMSS OX=294381 GN=EHI_136440 PE=4 SV=1	A0A8U0WPM9 (+2)	EHI_136440	77 kDa	0	0	0	1.1026	0.45853	0.74802
Transmembrane protein OS=Entamoeba histolytica HM-1:IMSS OX=294381 GN=EHI_168290 PE=4 SV=1	C4M4R5 (+2)	EHI_168290	19 kDa	0	0	0	0	0	0
FACT complex subunit SSRP1 OS=Entamoeba histolytica HM-1:IMSS OX=294381 GN=EHI_082500 PE=3 SV=1	C4M6A1 (+2)	EHI_082500	44 kDa	0	0	0	0	0.45853	0.37401
Uncharacterized protein OS=Entamoeba histolytica HM-1:IMSS-B OX=885319 GN=EHI8A_178480 PE=4 SV=1	M3U1L7 (+1)	EHI8A_178480	73 kDa	0	0	0	0	0	0.74802
RRM domain-containing protein OS=Entamoeba histolytica HM-1:IMSS OX=294381 GN=EHI_167680 PE=4 SV=1	C4M800 (+2)	EHI_167680	22 kDa	0	0	0	0	0	0.37401
Trichohyalin-like OS=Entamoeba histolytica HM-1:IMSS OX=294381 GN=EHI_002190 PE=4 SV=1	C4M821 (+1)	EHI_002190	69 kDa	0	0	0	0.55132	1.3756	0.37401
tRNA splicing endonuclease, putative OS=Entamoeba histolytica HM-1:IMSS OX=294381 GN=EHI_111220 PE=4 SV=1	C4M5H1 (+2)	EHI_111220	131 kDa	0	0	0	0	0.45853	0.74802
Aurora kinase OS=Entamoeba histolytica HM-1:IMSS OX=294381 GN=EHI_177010 PE=3 SV=1	C4LY26	EHI_177010	59 kDa	0	0	0	0	0	0.37401
Replication factor A protein 1, putative OS=Entamoeba histolytica HM-1:IMSS OX=294381 GN=EHI_062980 PE=3 SV=1	C4M8G6 (+2)	EHI_062980	67 kDa	0	0	0	0.55132	0	0.74802
Uncharacterized protein OS=Entamoeba histolytica HM-1:IMSS OX=294381 GN=EHI_054670 PE=4 SV=1	C4M2I6 (+2)	EHI_054670	22 kDa	0	0	0	0.55132	0	0.37401
Alpha-amylase family protein OS=Entamoeba histolytica HM-1:IMSS OX=294381 GN=EHI_023360 PE=4 SV=1	C4LUP7 (+2)	EHI_023360	57 kDa	0	0	0	0.55132	0	1.122
19S cap proteasome S2 subunit OS=Entamoeba histolytica HM-1:IMSS OX=294381 GN=EHI_198010 PE=3 SV=1	C4MB71 (+2)	EHI_198010	92 kDa	0	0	0	0	0	0
Uncharacterized protein OS=Entamoeba histolytica HM-1:IMSS OX=294381 GN=EHI_155310 PE=4 SV=1	C4LW84	EHI_155310	24 kDa	0	0	0	0	0.91705	0
Uncharacterized protein OS=Entamoeba histolytica HM-1:IMSS OX=294381 GN=EHI_152510 PE=4 SV=1	C4LST8 (+2)	EHI_152510	27 kDa	0	0	0	0	0.45853	0.37401
Uncharacterized protein OS=Entamoeba histolytica HM-1:IMSS OX=294381 GN=EHI_019630 PE=4 SV=1	C4MA47 (+2)	EHI_019630	23 kDa	0	0	0	0	0	0
LIM zinc finger domain containing protein OS=Entamoeba histolytica HM-1:IMSS OX=294381 GN=EHI_001070 PE=4 SV=1	C4M1I7 (+2)	EHI_001070	44 kDa	0	0	0	1.1026	0	0
Proliferating cell nuclear antigen OS=Entamoeba histolytica HM-1:IMSS OX=294381 GN=EHI_128450 PE=1 SV=1	C4M9R9 (+2)	EHI_128450	29 kDa	0	0	0	0	0	0.74802
Heat shock protein 70, putative OS=Entamoeba histolytica HM-1:IMSS OX=294381 GN=EHI_198320 PE=3 SV=1	C4MA95	EHI_198320	63 kDa	0	0	0	0.55132	0.91705	0.74802
VHS domain-containing protein OS=Entamoeba histolytica HM-1:IMSS OX=294381 GN=EHI_188100 PE=4 SV=1	C4M184 (+1)	EHI_188100	45 kDa	0	0	0	1.1026	0.91705	0
HMG box protein OS=Entamoeba histolytica HM-1:IMSS OX=294381 GN=EHI_179340 PE=4 SV=1	C4M9X4 (+2)	EHI_179340	45 kDa	0	0	0	1.1026	0	0
Transcription initiation factor SPT5, putative OS=Entamoeba histolytica HM-1:IMSS OX=294381 GN=EHI_187280 PE=3 SV=1	C4LVU5 (+2)	EHI_187280	89 kDa	0	0	0	0	0	0.74802
Uncharacterized protein OS=Entamoeba histolytica HM-1:IMSS OX=294381 GN=EHI_155400 PE=4 SV=1	C4LW91 (+2)	EHI_155400	25 kDa	0	0	0	1.1026	0.91705	0.37401
Copine, putative OS=Entamoeba histolytica HM-1:IMSS OX=294381 GN=EHI_163260 PE=4 SV=1	C4MBJ7 (+2)	EHI_163260	29 kDa	0	0	0	0	0.91705	0.74802
DUF1394 domain-containing protein OS=Entamoeba histolytica HM-1:IMSS OX=294381 GN=EHI_131000 PE=3 SV=1	C4LXG8 (+2)	EHI_131000	34 kDa	0	0	0	0	0	0.37401
DNA-directed RNA polymerase subunit N, putative OS=Entamoeba histolytica HM-1:IMSS OX=294381 GN=EHI_122780 PE=3 SV=1	C4M5M4 (+2)	EHI_122780	8 kDa	0	0	0	0.55132	0	0
RhoGAP domain containing protein OS=Entamoeba histolytica HM-1:IMSS OX=294381 GN=EHI_182930 PE=4 SV=1	C4LV70 (+2)	EHI_182930	108 kDa	0	0	0	1.1026	1.8341	0.37401
Proteasome subunit alpha type OS=Entamoeba histolytica HM-1:IMSS OX=294381 GN=EHI_004760 PE=3 SV=1	C4LUL4	EHI_004760	27 kDa	0	0	0	0	0.45853	0
Phospholipid-transporting ATPase OS=Entamoeba histolytica HM-1:IMSS OX=294381 GN=EHI_009460 PE=3 SV=1	C4LZ23 (+1)	EHI_009460	129 kDa	0	0	0	0	0.91705	0.37401
CUB_2 domain-containing protein OS=Entamoeba histolytica HM-1:IMSS OX=294381 GN=EHI_107300 PE=4 SV=1	C4M171 (+2)	EHI_107300	34 kDa	0	0	0	1.654	0.91705	0
Lipase_3 domain-containing protein OS=Entamoeba histolytica HM-1:IMSS OX=294381 GN=EHI_077750 PE=4 SV=1	C4MAW4	EHI_077750	94 kDa	0	0	0	0.55132	0.91705	1.122
V-type proton ATPase subunit C OS=Entamoeba histolytica HM-1:IMSS-B OX=885319 GN=EHI8A_095620 PE=3 SV=1	M3TNT5	EHI8A_095620	74 kDa	0	0	0	0	0.91705	0.37401
WD domain containing protein OS=Entamoeba histolytica HM-1:IMSS OX=294381 GN=EHI_170100 PE=4 SV=1	C4M1D2 (+2)	EHI_170100	55 kDa	0	0	0	0	0	0
Kinesin, putative OS=Entamoeba histolytica HM-1:IMSS OX=294381 GN=EHI_119530 PE=3 SV=1	C4M7Y1	EHI_119530	64 kDa	0	0	0	1.1026	0	1.122
LIM zinc finger domain containing protein OS=Entamoeba histolytica HM-1:IMSS OX=294381 GN=EHI_111790 PE=4 SV=1	C4M577 (+2)	EHI_111790	19 kDa	0	0	0	0	0.91705	0.37401
HABP4_PAI-RBP1 domain-containing protein OS=Entamoeba histolytica HM-1:IMSS OX=294381 GN=EHI_017690 PE=4 SV=1	C4M3F2	EHI_017690	42 kDa	4.3497	0	0	0	0	0
DNA double-strand break repair Rad50 ATPase OS=Entamoeba histolytica HM-1:IMSS OX=294381 GN=EHI_001130 PE=4 SV=1	C4M1J3 (+2)	EHI_001130	59 kDa	0	0	0	0.55132	0.45853	0.37401
Tetratricopeptide repeat protein OS=Entamoeba histolytica HM-1:IMSS OX=294381 GN=EHI_010040 PE=3 SV=1	C4M0R8 (+2)	EHI_010040	31 kDa	0	0	0	0.55132	0.91705	0.74802
AP-1 complex subunit mu-2, putative OS=Entamoeba histolytica HM-1:IMSS OX=294381 GN=EHI_124460 PE=4 SV=1	A0A8U0WP62	EHI_124460	50 kDa	0	0	0	0	0.91705	1.122
Proteasome alpha subunit, putative OS=Entamoeba histolytica HM-1:IMSS OX=294381 GN=EHI_086080 PE=3 SV=1	C4M363 (+2)	EHI_086080	28 kDa	4.3497	3.5464	0	1.1026	0	0.37401
Uncharacterized protein OS=Entamoeba histolytica HM-1:IMSS OX=294381 GN=EHI_097920 PE=4 SV=1	B1N3N5 (+2)	EHI_097920	21 kDa	0	0	0	0.55132	0.45853	0.74802
Cell division cycle protein 48, putative OS=Entamoeba histolytica HM-1:IMSS OX=294381 GN=EHI_045120 PE=4 SV=1	C4LTC5 (+2)	EHI_045120	88 kDa	0	0	0	0	0.45853	0.74802
Proteasome endopeptidase complex OS=Entamoeba histolytica HM-1:IMSS OX=294381 GN=EHI_148040 PE=4 SV=1	C4LSX4 (+2)	EHI_148040	29 kDa	0	0	0	0	0	0
Lysine--tRNA ligase OS=Entamoeba histolytica HM-1:IMSS OX=294381 GN=EHI_047810 PE=1 SV=1	C4M7X2	EHI_047810	87 kDa	0	0	0	0.55132	0.45853	0
Pescadillo homolog OS=Entamoeba histolytica HM-1:IMSS OX=294381 GN=EHI_009860 PE=3 SV=1	C4M0Q1 (+2)	EHI_009860	63 kDa	0	0	0	0	0	0.37401
Glycoside hydrolase OS=Entamoeba histolytica HM-1:IMSS OX=294381 GN=EHI_044370 PE=4 SV=1	C4M784 (+2)	EHI_044370	78 kDa	0	0	0	0.55132	0.45853	0.37401
Phospholipase B-like OS=Entamoeba histolytica HM-1:IMSS OX=294381 GN=EHI_118820 PE=3 SV=1	C4LYN0 (+2)	EHI_118820	64 kDa	0	0	0	1.1026	0.45853	0.37401
Coronin OS=Entamoeba histolytica HM-1:IMSS OX=294381 GN=EHI_082080 PE=3 SV=1	C4M5U0 (+2)	EHI_082080	102 kDa	0	0	0	0	0	0.37401
AP-1 complex subunit gamma OS=Entamoeba histolytica HM-1:IMSS-A OX=885318 GN=EHI7A_121960 PE=3 SV=1	N9TKJ6	EHI7A_121960	94 kDa	0	0	0	0.55132	0	0.37401
V-type ATPase, D subunit, putative OS=Entamoeba histolytica HM-1:IMSS OX=294381 GN=EHI_056390 PE=3 SV=1	C4M6Y9 (+2)	EHI_056390	29 kDa	0	0	0	0	0	0.37401
CRC domain-containing protein OS=Entamoeba histolytica HM-1:IMSS OX=294381 GN=EHI_153340 PE=4 SV=1	C4LSC5 (+2)	EHI_153340	20 kDa	0	0	0	0	0	0.37401
Dynamin-1-like protein, putative OS=Entamoeba histolytica HM-1:IMSS OX=294381 GN=EHI_013180 PE=4 SV=1	C4LX84 (+2)	EHI_013180	77 kDa	0	0	0	0	0.45853	0
Protein kinase, putative OS=Entamoeba histolytica HM-1:IMSS OX=294381 GN=EHI_124860 PE=4 SV=1	C4M980 (+2)	EHI_124860	123 kDa	0	0	0	0	1.3756	0
WD domain, G-beta repeat protein OS=Entamoeba histolytica HM-1:IMSS OX=294381 GN=EHI_000530 PE=4 SV=1	C4LZA4 (+2)	EHI_000530	69 kDa	0	0	0	0	0	0
SH3 domain-containing protein OS=Entamoeba histolytica HM-1:IMSS OX=294381 GN=EHI_148050 PE=4 SV=1	C4LSX5 (+2)	EHI_148050	44 kDa	0	0	0	0	0	0.37401
60S acidic ribosomal protein P2, putative OS=Entamoeba histolytica HM-1:IMSS OX=294381 GN=EHI_179980 PE=3 SV=1	C4M649 (+2)	EHI_179980	11 kDa	0	0	0	0	0	0
SH3 domain protein OS=Entamoeba histolytica HM-1:IMSS OX=294381 GN=EHI_187770 PE=4 SV=1	C4M9I2 (+2)	EHI_187770	40 kDa	0	0	0	1.1026	0	0
rRNA processing protein, putative OS=Entamoeba histolytica HM-1:IMSS OX=294381 GN=EHI_055830 PE=3 SV=1	B1N2M7 (+2)	EHI_055830	25 kDa	0	0	0	0.55132	0.45853	0.37401
Rho family GTPase OS=Entamoeba histolytica HM-1:IMSS OX=294381 GN=EHI_180430 PE=3 SV=1	C4M292 (+2)	EHI_180430	22 kDa	0	0	0	0.55132	0	0
Eukaryotic translation initiation factor 3 30 kDa subunit OS=Entamoeba histolytica HM-1:IMSS OX=294381 GN=EHI_178890 PE=4 SV=1	C4LUV3 (+2)	EHI_178890	25 kDa	0	0	0	0	0.91705	0.37401
EhCdc50 protein OS=Entamoeba histolytica HM-1:IMSS OX=294381 GN=EhCdc50 PE=3 SV=1	C4M6E4 (+2)	EhCdc50	36 kDa	0	0	0	0	0	0.37401
Protein kinase domain containing protein OS=Entamoeba histolytica HM-1:IMSS OX=294381 GN=EHI_087370 PE=4 SV=1	C4LXT0 (+2)	EHI_087370	30 kDa	0	0	0	0	0	0
Uncharacterized protein OS=Entamoeba histolytica HM-1:IMSS OX=294381 GN=EHI_124820 PE=4 SV=1	C4M976 (+2)	EHI_124820	33 kDa	0	0	0	0.55132	0	0
Serine carboxypeptidase (S28) family protein OS=Entamoeba histolytica HM-1:IMSS OX=294381 GN=EHI_054530 PE=3 SV=1	C4M2I4 (+2)	EHI_054530	53 kDa	0	0	0	0.55132	0.91705	0.74802
RNA polymerase subunit Rpb5, putative OS=Entamoeba histolytica HM-1:IMSS OX=294381 GN=EHI_142090 PE=3 SV=1	C4LW54 (+2)	EHI_142090	24 kDa	0	0	0	0	0	0.37401
Bromo domain-containing protein OS=Entamoeba histolytica HM-1:IMSS OX=294381 GN=EHI_138760 PE=4 SV=1	C4M4I2 (+2)	EHI_138760	76 kDa	0	0	0	0	0.45853	0.37401
WD domain containing protein OS=Entamoeba histolytica HM-1:IMSS OX=294381 GN=EHI_001960 PE=4 SV=1	C4M5L0 (+2)	EHI_001960	101 kDa	0	0	0	0	0	0.74802
Tubulin alpha chain OS=Entamoeba histolytica HM-1:IMSS OX=294381 GN=EHI_010530 PE=3 SV=1	C4LYU0	EHI_010530	50 kDa	0	0	0	0	0	0
Trichohyalin OS=Entamoeba histolytica HM-1:IMSS OX=294381 GN=EHI_131480 PE=4 SV=1	C4M9Y3 (+1)	EHI_131480	90 kDa	0	0	0	0	0	0.37401
Ras GEF OS=Entamoeba histolytica HM-1:IMSS OX=294381 GN=EHI_079250 PE=3 SV=1	C4M7R6 (+2)	EHI_079250	56 kDa	0	0	0	1.654	0	0.74802
Guanine nucleotide-binding protein subunit beta, putative OS=Entamoeba histolytica HM-1:IMSS OX=294381 GN=EHI_000240 PE=3 SV=1	C4LZ87 (+2)	EHI_000240	39 kDa	0	0	0	0	0	0.37401
Heat shock protein 70 OS=Entamoeba histolytica HM-1:IMSS OX=294381 GN=EHI_035730 PE=4 SV=1	B1N2Z1 (+2)	EHI_035730	79 kDa	0	0	0	1.1026	0.45853	0.37401
Alpha-soluble NSF attachment protein, putative OS=Entamoeba histolytica HM-1:IMSS OX=294381 GN=EHI_064680 PE=3 SV=1	C4M0D4 (+2)	EHI_064680	32 kDa	0	0	0	1.654	0	0.74802
26S protease regulatory subunit, putative OS=Entamoeba histolytica HM-1:IMSS OX=294381 GN=EHI_180350 PE=3 SV=1	C4M285 (+2)	EHI_180350	46 kDa	0	0	0	0	0.91705	0
Calcium-transporting ATPase OS=Entamoeba histolytica HM-1:IMSS OX=294381 GN=EHI_054830 PE=3 SV=1	C4M2K1	EHI_054830	121 kDa	0	0	0	1.654	0	0
WD domain containing protein OS=Entamoeba histolytica HM-1:IMSS OX=294381 GN=EHI_067830 PE=4 SV=1	C4LTX9 (+2)	EHI_067830	93 kDa	0	0	0	0	0	0
AP-2 complex protein, putative OS=Entamoeba histolytica HM-1:IMSS OX=294381 GN=EHI_045710 PE=4 SV=1	A0A8U0WPP0 (+2)	EHI_045710	109 kDa	0	0	0	0.55132	0.45853	0.37401
Sec61 alpha subunit, putative OS=Entamoeba histolytica HM-1:IMSS OX=294381 GN=EHI_164500 PE=3 SV=1	C4M1T1	EHI_164500	37 kDa	0	7.0927	0	0	0	0
Thioredoxin, putative OS=Entamoeba histolytica HM-1:IMSS OX=294381 GN=EHI_042900 PE=4 SV=1	C4M658 (+2)	EHI_042900	16 kDa	0	0	0	0.55132	0.45853	0.74802
60S ribosomal protein L35, putative OS=Entamoeba histolytica HM-1:IMSS OX=294381 GN=EHI_042720 PE=3 SV=1	C4MB46 (+1)	EHI_042720	13 kDa	0	0	0	0	0	0
Sulfite exporter TauE/SafE family protein OS=Entamoeba histolytica HM-1:IMSS OX=294381 GN=EHI_078310 PE=4 SV=1	C4M550 (+2)	EHI_078310	50 kDa	0	0	0	0.55132	0.45853	0.74802
Pore-forming peptide ameobapore B, putative OS=Entamoeba histolytica HM-1:IMSS OX=294381 GN=EHI_194540 PE=4 SV=1	B1N366 (+2)	EHI_194540	10 kDa	0	0	0	0	0.91705	0
TLDc domain-containing protein OS=Entamoeba histolytica HM-1:IMSS OX=294381 GN=EHI_155720 PE=4 SV=1	C4LWC1 (+2)	EHI_155720	41 kDa	0	0	0	0.55132	0.45853	0.74802
Ras family GTPase OS=Entamoeba histolytica HM-1:IMSS OX=294381 GN=EHI_137700 PE=4 SV=1	A0A8U0WNZ9 (+2)	EHI_137700	23 kDa	0	0	0	0.55132	0.45853	0
Hsc70-interacting protein, putative OS=Entamoeba histolytica HM-1:IMSS OX=294381 GN=EHI_158050 PE=4 SV=1	C4M2C4 (+2)	EHI_158050	40 kDa	0	0	0	0.55132	0	0.74802
Translation initiation factor IF-2 OS=Entamoeba histolytica HM-1:IMSS OX=294381 GN=EHI_180410 PE=4 SV=1	C4M290 (+1)	EHI_180410	33 kDa	0	0	0	0.55132	0.45853	0.37401
Arrestin_C domain-containing protein OS=Entamoeba histolytica HM-1:IMSS OX=294381 GN=EHI_167660 PE=4 SV=1	C4M7Z8 (+2)	EHI_167660	74 kDa	0	0	0	0	0.45853	0.37401
Secreted protein OS=Entamoeba histolytica HM-1:IMSS OX=294381 GN=EHI_120600 PE=4 SV=1	C4M8X1 (+1)	EHI_120600	34 kDa	0	0	0	0	0	0
Ribosome assembly factor mrt4 OS=Entamoeba histolytica HM-1:IMSS OX=294381 GN=EHI_159790 PE=3 SV=1	C4LX57	EHI_159790	26 kDa	0	0	0	0	0	0
WD repeat protein 2, putative OS=Entamoeba histolytica HM-1:IMSS OX=294381 GN=EHI_142190 PE=4 SV=1	B1N2S4 (+1)	EHI_142190	65 kDa	0	0	0	0	0.45853	0
Cullin, putative OS=Entamoeba histolytica HM-1:IMSS OX=294381 GN=EHI_148160 PE=3 SV=1	C4LSY6 (+2)	EHI_148160	82 kDa	0	0	0	0	0	0.74802
Thioredoxin, putative OS=Entamoeba histolytica HM-1:IMSS OX=294381 GN=EHI_026340 PE=3 SV=1	C4M5V0 (+2)	EHI_026340	14 kDa	0	0	0	0	0	0
Protein kinase domain-containing protein OS=Entamoeba histolytica HM-1:IMSS OX=294381 GN=EHI_070680 PE=4 SV=1	C4M5S0 (+2)	EHI_070680	56 kDa	0	0	0	0	0.45853	1.122
Uncharacterized protein OS=Entamoeba histolytica HM-1:IMSS OX=294381 GN=EHI_077530 PE=4 SV=1	C4M8N5 (+1)	EHI_077530	23 kDa	0	0	0	0.55132	0.45853	0.74802
Dolichyl-diphosphooligosaccharide--protein glycosyltransferase 48 kDa subunit OS=Entamoeba histolytica HM-1:IMSS OX=294381 GN=EHI_183010 PE=3 SV=1	C4LV77 (+2)	EHI_183010	43 kDa	0	0	0	0.55132	0.91705	0.37401
Skp1 protein, putative OS=Entamoeba histolytica HM-1:IMSS OX=294381 GN=EHI_118670 PE=3 SV=1	C4LYL7 (+2)	EHI_118670	19 kDa	0	0	0	0	0.45853	0
Polyadenylate-binding protein, putative OS=Entamoeba histolytica HM-1:IMSS OX=294381 GN=EHI_033250 PE=3 SV=1	C4M6Y2 (+2)	EHI_033250	59 kDa	0	0	0	0	0	0
Uncharacterized protein OS=Entamoeba histolytica HM-1:IMSS OX=294381 GN=EHI_098000 PE=4 SV=1	C4M497 (+2)	EHI_098000	32 kDa	0	0	0	0.55132	0.45853	0.37401
EF-hand domain-containing protein OS=Entamoeba histolytica HM-1:IMSS OX=294381 GN=EHI_114440 PE=4 SV=1	B1N4B0 (+3)	EHI_114440	43 kDa	0	0	0	0	0	1.122
TLDc domain-containing protein OS=Entamoeba histolytica HM-1:IMSS OX=294381 GN=EHI_024440 PE=4 SV=1	C4M0I6 (+2)	EHI_024440	29 kDa	0	0	0	1.1026	0.91705	0
Thioredoxin, putative OS=Entamoeba histolytica HM-1:IMSS OX=294381 GN=EHI_021560 PE=4 SV=1	C4M067 (+2)	EHI_021560	43 kDa	0	0	0	0	1.3756	0
DnaJ family protein OS=Entamoeba histolytica HM-1:IMSS OX=294381 GN=EHI_079720 PE=3 SV=1	C4M2K3 (+2)	EHI_079720	46 kDa	0	0	0	0	0	0
Coenzyme A transferase OS=Entamoeba histolytica HM-1:IMSS OX=294381 GN=EHI_124510 PE=4 SV=1	C4LZI7 (+2)	EHI_124510	23 kDa	0	0	0	0	0	0
Transmembrane protein OS=Entamoeba histolytica HM-1:IMSS OX=294381 GN=EHI_111800 PE=4 SV=1	C4M578 (+2)	EHI_111800	33 kDa	0	0	0	0.55132	0	0
Proteasome regulatory subunit, putative OS=Entamoeba histolytica HM-1:IMSS OX=294381 GN=EHI_030170 PE=3 SV=1	C4M451 (+2)	EHI_030170	36 kDa	0	0	0	0.55132	0	0
TLDc domain-containing protein OS=Entamoeba histolytica HM-1:IMSS OX=294381 GN=EHI_060440 PE=4 SV=1	B1N3Z9 (+2)	EHI_060440	31 kDa	0	0	0	0	0	0
Uncharacterized protein OS=Entamoeba histolytica HM-1:IMSS OX=294381 GN=EHI_080580 PE=4 SV=1	C4M9N7 (+2)	EHI_080580	13 kDa	0	0	0	0	0	0.37401
Filopodin, putative OS=Entamoeba histolytica HM-1:IMSS-B OX=885319 GN=EHI8A_075480 PE=4 SV=1	M3S0M1 (+1)	EHI8A_075480	152 kDa	0	0	0	0	0	0
Rab GTPase activating protein, putative OS=Entamoeba histolytica HM-1:IMSS OX=294381 GN=EHI_010690 PE=4 SV=1	C4LYV6 (+2)	EHI_010690	73 kDa	0	0	0	0	0.45853	0.74802
DEAD/DEAH box helicase, putative OS=Entamoeba histolytica HM-1:IMSS OX=294381 GN=EHI_119620 PE=3 SV=1	C4M7Y5 (+2)	EHI_119620	80 kDa	0	0	0	0	0	0.37401
AIG1 family protein OS=Entamoeba histolytica HM-1:IMSS OX=294381 GN=EHI_144270 PE=4 SV=1	C4MB61	EHI_144270	33 kDa	0	0	0	0.55132	0	0
Secreted protein OS=Entamoeba histolytica HM-1:IMSS OX=294381 GN=EHI_139010 PE=4 SV=1	C4M4J1 (+2)	EHI_139010	19 kDa	0	0	0	0.55132	0.45853	0.37401
Rab family GTPase OS=Entamoeba histolytica HM-1:IMSS OX=294381 GN=EHI_042250 PE=4 SV=1	A0A8U0WPF2 (+2)	EHI_042250	22 kDa	0	0	0	0.55132	0	0
MIT_C domain-containing protein OS=Entamoeba histolytica HM-1:IMSS OX=294381 GN=EHI_125600 PE=4 SV=1	C4LVU8 (+2)	EHI_125600	25 kDa	0	0	0	0	0.45853	0.37401
C2 domain-containing protein OS=Entamoeba histolytica HM-1:IMSS OX=294381 GN=EHI_163640 PE=4 SV=1	C4M3U4 (+1)	EHI_163640	49 kDa	0	0	0	0.55132	0	0.37401
RING-type domain-containing protein OS=Entamoeba histolytica HM-1:IMSS OX=294381 GN=EHI_108730 PE=4 SV=1	C4M837 (+2)	EHI_108730	78 kDa	0	0	0	0	0	0
Uncharacterized protein OS=Entamoeba histolytica HM-1:IMSS OX=294381 GN=EHI_021410 PE=4 SV=1	A0A8U0WPX7 (+2)	EHI_021410	26 kDa	0	0	0	0.55132	0.91705	0.37401
C2 domain-containing protein OS=Entamoeba histolytica HM-1:IMSS OX=294381 GN=EHI_189170 PE=3 SV=1	C4M9K8 (+2)	EHI_189170	84 kDa	0	0	0	0	0	0.74802
Nucleoporin p58/p45 OS=Entamoeba histolytica HM-1:IMSS OX=294381 GN=EHI_006730 PE=4 SV=1	C4M0E6 (+2)	EHI_006730	42 kDa	0	0	0	0.55132	0	0.37401
Proteasome regulatory subunit, putative OS=Entamoeba histolytica HM-1:IMSS OX=294381 GN=EHI_182600 PE=3 SV=1	C4LV41 (+2)	EHI_182600	43 kDa	0	0	0	0	0	0
Uncharacterized protein OS=Entamoeba histolytica HM-1:IMSS OX=294381 GN=EHI_151550 PE=4 SV=1	C4LSJ6 (+1)	EHI_151550	11 kDa	0	0	0	0	0	0.37401
Kinetochore protein NDC80 OS=Entamoeba histolytica HM-1:IMSS OX=294381 GN=EHI_125620 PE=3 SV=1	C4LVV0 (+2)	EHI_125620	67 kDa	0	0	0	0	0.45853	0.37401
Splicing factor3B subunit 2, putative OS=Entamoeba histolytica HM-1:IMSS OX=294381 GN=EHI_069550 PE=4 SV=1	C4LWP3 (+2)	EHI_069550	24 kDa	0	0	0	0	0.45853	0.74802
Phospholipase B-like OS=Entamoeba histolytica HM-1:IMSS OX=294381 GN=EHI_097630 PE=3 SV=1	C4M934 (+2)	EHI_097630	59 kDa	0	0	0	1.654	0.91705	0.74802
PT-TG domain-containing protein OS=Entamoeba histolytica HM-1:IMSS OX=294381 GN=EHI_159670 PE=4 SV=1	C4LX47 (+2)	EHI_159670	46 kDa	0	0	0	0.55132	0.91705	0.74802
60S ribosomal protein L37a, putative OS=Entamoeba histolytica HM-1:IMSS OX=294381 GN=EHI_008650 PE=3 SV=1	A0A175JXH6 (+3)	EHI_008650	10 kDa	0	0	0	0	0	0
Purine nucleoside phosphorylase, putative OS=Entamoeba histolytica HM-1:IMSS OX=294381 GN=EHI_200080 PE=4 SV=1	C4M7M1 (+2)	EHI_200080	35 kDa	0	0	0	0	0.45853	0
60S ribosome subunit biogenesis protein NIP7 homolog OS=Entamoeba histolytica HM-1:IMSS OX=294381 GN=EHI_017890 PE=3 SV=1	B1N5A1 (+1)	EHI_017890	21 kDa	0	0	0	0	0	0
Golgi apparatus membrane protein TVP23 homolog OS=Entamoeba histolytica HM-1:IMSS OX=294381 GN=EHI_148020 PE=3 SV=1	C4LSX2 (+2)	EHI_148020	23 kDa	0	3.5464	3.0397	0	0	0
Rab family GTPase OS=Entamoeba histolytica HM-1:IMSS-B OX=885319 GN=EHI8A_174230 PE=3 SV=1	M3UQE9	EHI8A_174230	21 kDa	0	0	0	0.55132	0.45853	0.74802
NPL domain-containing protein OS=Entamoeba histolytica HM-1:IMSS OX=294381 GN=EHI_052040 PE=4 SV=1	C4M859 (+2)	EHI_052040	23 kDa	0	0	0	0	0	0
Uncharacterized protein OS=Entamoeba histolytica HM-1:IMSS OX=294381 GN=EHI_007490 PE=4 SV=1	C4LYC1 (+2)	EHI_007490	41 kDa	0	0	0	0	0.45853	0.37401
Protein MNN4 OS=Entamoeba histolytica HM-1:IMSS OX=294381 GN=EHI_198680 PE=4 SV=1	C4LWR4 (+1)	EHI_198680	28 kDa	0	0	0	0.55132	0	0.37401
Ricin B-type lectin domain-containing protein OS=Entamoeba histolytica HM-1:IMSS OX=294381 GN=EHI_107930 PE=4 SV=1	B1N4G5 (+2)	EHI_107930	22 kDa	0	0	0	0	0	0.37401
RICIN domain-containing protein OS=Entamoeba histolytica HM-1:IMSS OX=294381 GN=EHI_138510 PE=4 SV=1	C4M3J3 (+2)	EHI_138510	32 kDa	0	0	0	0	0	0.37401
Cortexillin II, putative OS=Entamoeba histolytica HM-1:IMSS-A OX=885318 GN=EHI7A_184960 PE=4 SV=1	N9V0H2	EHI7A_184960	62 kDa	0	0	0	0	0	0
Uncharacterized protein OS=Entamoeba histolytica HM-1:IMSS OX=294381 GN=EHI_053850 PE=4 SV=1	C4MBD9 (+2)	EHI_053850	76 kDa	0	0	0	0.55132	0.45853	0
Dolichyl-diphosphooligosaccharide--protein glycosyltransferase 48 kDa subunit OS=Entamoeba histolytica HM-1:IMSS OX=294381 GN=EHI_069430 PE=3 SV=1	C4LWN1 (+3)	EHI_069430	48 kDa	0	0	0	0	0	0.37401
40S ribosomal protein S12 OS=Entamoeba histolytica HM-1:IMSS OX=294381 GN=EHI_186720 PE=3 SV=1	C4LVN9 (+1)	EHI_186720	15 kDa	0	3.5464	0	0	0	0
Histone H3, putative OS=Entamoeba histolytica HM-1:IMSS OX=294381 GN=EHI_178480 PE=3 SV=1	C4LUR4 (+2)	EHI_178480	24 kDa	0	0	0	0	0	0.74802
DnaJ family protein OS=Entamoeba histolytica HM-1:IMSS OX=294381 GN=EHI_151260 PE=3 SV=1	C4LSG9 (+2)	EHI_151260	45 kDa	0	0	0	0	0	0
Uncharacterized protein OS=Entamoeba histolytica HM-1:IMSS OX=294381 GN=EHI_011830 PE=4 SV=1	C4LTH9 (+1)	EHI_011830	19 kDa	0	0	0	0	0.91705	0.37401
V-type proton ATPase proteolipid subunit OS=Entamoeba histolytica HM-1:IMSS OX=294381 GN=EHI_059840 PE=3 SV=1	C4M343 (+1)	EHI_059840	18 kDa	0	0	0	0	0	0
Nuclear transport receptor, putative OS=Entamoeba histolytica HM-1:IMSS OX=294381 GN=EHI_166900 PE=4 SV=1	C4LY94 (+2)	EHI_166900	106 kDa	0	0	0	0	0.45853	0.37401
Ribosome assembly protein 3 OS=Entamoeba histolytica HM-1:IMSS OX=294381 GN=EHI_194360 PE=3 SV=1	B1N365 (+2)	EHI_194360	32 kDa	0	0	0	0	0	0.74802
Uncharacterized protein OS=Entamoeba histolytica HM-1:IMSS OX=294381 GN=EHI_079850 PE=4 SV=1	C4M2K6 (+1)	EHI_079850	23 kDa	0	0	0	0	0	0.37401
Ribosome biogenesis protein NSA2 homolog OS=Entamoeba histolytica HM-1:IMSS OX=294381 GN=EHI_099760 PE=3 SV=1	C4M6H0 (+2)	EHI_099760	30 kDa	0	0	0	0	0	0.37401
Uncharacterized protein OS=Entamoeba histolytica HM-1:IMSS OX=294381 GN=EHI_194980 PE=4 SV=1	C4M403 (+2)	EHI_194980	53 kDa	0	0	0	0.55132	0	0
Nucleosome assembly protein, putative OS=Entamoeba histolytica HM-1:IMSS OX=294381 GN=EHI_084970 PE=3 SV=1	C4M1K7 (+2)	EHI_084970	37 kDa	0	0	0	0.55132	0	0.74802
WD repeat protein OS=Entamoeba histolytica HM-1:IMSS OX=294381 GN=EHI_117620 PE=4 SV=1	C4M677 (+2)	EHI_117620	31 kDa	0	0	0	0	0	0.74802
Helicase, putative OS=Entamoeba histolytica HM-1:IMSS OX=294381 GN=EHI_096230 PE=4 SV=1	C4LWD6 (+1)	EHI_096230	77 kDa	0	0	0	0	0	0
Uncharacterized protein OS=Entamoeba histolytica HM-1:IMSS OX=294381 GN=EHI_038590 PE=4 SV=1	A0A8U0WP28 (+2)	EHI_038590	22 kDa	0	0	0	0	0.45853	0.74802
Xaa-Pro dipeptidase, putative OS=Entamoeba histolytica HM-1:IMSS OX=294381 GN=EHI_010070 PE=4 SV=1	C4M0S1 (+2)	EHI_010070	54 kDa	0	0	0	0	0.45853	0
NPL domain-containing protein OS=Entamoeba histolytica HM-1:IMSS OX=294381 GN=EHI_112830 PE=4 SV=1	C4M9M2 (+2)	EHI_112830	23 kDa	0	0	0	0.55132	0	0
Cysteine proteinase 1, putative OS=Entamoeba histolytica HM-1:IMSS OX=294381 GN=EHI_074180 PE=3 SV=1	C4M307	EHI_074180	35 kDa	0	0	0	0	0	0
Transmembrane protein OS=Entamoeba histolytica HM-1:IMSS OX=294381 GN=EHI_139040 PE=4 SV=1	C4M4J4 (+2)	EHI_139040	56 kDa	0	0	0	0.55132	0.45853	0.74802
Bromodomain protein, putative OS=Entamoeba histolytica HM-1:IMSS OX=294381 GN=EHI_200210 PE=4 SV=1	C4M7M6 (+2)	EHI_200210	64 kDa	0	0	0	0	0	0.37401
RING-type domain-containing protein OS=Entamoeba histolytica HM-1:IMSS OX=294381 GN=EHI_193090 PE=4 SV=1	C4M9B1 (+2)	EHI_193090	65 kDa	0	0	0	0	0.45853	0.37401
KIN17-like protein OS=Entamoeba histolytica HM-1:IMSS OX=294381 GN=EHI_148150 PE=4 SV=1	C4LSY5 (+2)	EHI_148150	34 kDa	0	0	0	0	0	0.37401
Clathrin adaptor complex small chain, putative OS=Entamoeba histolytica HM-1:IMSS OX=294381 GN=EHI_009940 PE=4 SV=1	A0A8U0WPX6	EHI_009940	17 kDa	0	0	0	0	0	0
V-type proton ATPase subunit H OS=Entamoeba histolytica HM-1:IMSS OX=294381 GN=EHI_068750 PE=3 SV=1	C4LU65 (+2)	EHI_068750	52 kDa	0	0	0	1.1026	0	0
VWFA domain-containing protein OS=Entamoeba histolytica HM-1:IMSS OX=294381 GN=EHI_001100 PE=4 SV=1	C4M1J0 (+1)	EHI_001100	55 kDa	0	0	0	0.55132	0.45853	0.74802
Actobindin, putative OS=Entamoeba histolytica HM-1:IMSS OX=294381 GN=EHI_039020 PE=4 SV=1	C4LZS3 (+2)	EHI_039020	9 kDa	0	0	6.0795	0	0	0
S-phase kinase-associated protein 1A, putative OS=Entamoeba histolytica HM-1:IMSS OX=294381 GN=EHI_134960 PE=3 SV=1	C4M0Y3 (+2)	EHI_134960	18 kDa	0	0	0	0	0.91705	0
WD domain containing protein OS=Entamoeba histolytica HM-1:IMSS OX=294381 GN=EHI_052160 PE=4 SV=1	C4M856 (+2)	EHI_052160	59 kDa	0	0	0	0	0	0.37401
WD domain containing protein OS=Entamoeba histolytica HM-1:IMSS OX=294381 GN=EHI_035590 PE=4 SV=1	C4LXY9 (+2)	EHI_035590	74 kDa	0	0	0	0	0	0
Uncharacterized protein OS=Entamoeba histolytica HM-1:IMSS OX=294381 GN=EHI_116720 PE=4 SV=1	A0A8U0WP44 (+2)	EHI_116720	24 kDa	0	0	0	0	0.45853	0.37401
Uncharacterized protein OS=Entamoeba histolytica HM-1:IMSS OX=294381 GN=EHI_137920 PE=4 SV=1	C4LZF3 (+1)	EHI_137920	56 kDa	0	0	0	1.1026	0.45853	0.37401
Calponin-homology (CH) domain-containing protein OS=Entamoeba histolytica HM-1:IMSS OX=294381 GN=EHI_007640 PE=4 SV=1	C4LYC5 (+1)	EHI_007640	140 kDa	0	0	0	0	0.91705	0
Surface antigen ariel1, putative OS=Entamoeba histolytica HM-1:IMSS OX=294381 GN=EHI_080200 PE=4 SV=1	B1N4C2 (+4)	EHI_080200	25 kDa	0	0	0	1.1026	0	0.37401
Cysteine proteinase, putative OS=Entamoeba histolytica HM-1:IMSS OX=294381 GN=EHI_168240 PE=4 SV=1	A0A8U0WQ39 (+2)	EHI_168240	35 kDa	0	0	0	0.55132	0	0
Ras family GTPase OS=Entamoeba histolytica HM-1:IMSS OX=294381 GN=EHI_196530 PE=3 SV=1	C4MAI1 (+2)	EHI_196530	24 kDa	0	0	0	0.55132	0.45853	0.74802
Helicase, putative OS=Entamoeba histolytica HM-1:IMSS OX=294381 GN=EHI_151600 PE=4 SV=1	C4LSK1 (+2)	EHI_151600	47 kDa	0	0	0	0	0	0
Phospholipase B-like OS=Entamoeba histolytica HM-1:IMSS OX=294381 GN=EHI_114320 PE=3 SV=1	C4M8M7 (+2)	EHI_114320	63 kDa	0	0	0	0.55132	0.45853	0
Scaffoldin OS=Entamoeba histolytica HM-1:IMSS OX=294381 GN=EHI_011560 PE=4 SV=1	C4M9J2	EHI_011560	59 kDa	0	0	0	0.55132	0.91705	0
SPK domain-containing protein OS=Entamoeba histolytica HM-1:IMSS OX=294381 GN=EHI_110440 PE=4 SV=1	C4LU96 (+2)	EHI_110440	39 kDa	0	0	0	0.55132	0	0.37401
Ribosome biogenesis protein WDR12 homolog OS=Entamoeba histolytica HM-1:IMSS OX=294381 GN=EHI_118030 PE=3 SV=1	C4LYY7 (+2)	EHI_118030	45 kDa	0	0	0	0	0	0
Nucleolar protein 16 OS=Entamoeba histolytica HM-1:IMSS OX=294381 GN=EHI_098080 PE=3 SV=1	C4M4A4 (+1)	EHI_098080	24 kDa	0	0	0	0	0	0
U3 small nucleolar RNA-associated protein 6 OS=Entamoeba histolytica HM-1:IMSS OX=294381 GN=EHI_012960 PE=3 SV=1	C4LX68 (+1)	EHI_012960	60 kDa	0	0	0	0	0	0.74802
DEAD/DEAH box helicase, putative OS=Entamoeba histolytica HM-1:IMSS OX=294381 GN=EHI_052790 PE=4 SV=1	C4M3R8 (+2)	EHI_052790	57 kDa	0	0	0	0	0	1.122
WD domain containing protein OS=Entamoeba histolytica HM-1:IMSS OX=294381 GN=EHI_140750 PE=4 SV=1	C4M3P7 (+2)	EHI_140750	87 kDa	0	0	0	0.55132	0	0.74802
RNA cytidine acetyltransferase OS=Entamoeba histolytica HM-1:IMSS OX=294381 GN=EHI_033750 PE=3 SV=1	C4M438 (+2)	EHI_033750	111 kDa	0	0	0	0	0	0.37401
40S ribosomal protein S11, putative OS=Entamoeba histolytica HM-1:IMSS OX=294381 GN=EHI_124850 PE=3 SV=1	C4M979 (+1)	EHI_124850	18 kDa	0	0	0	0	0	0
Zinc finger, CCHC-type domain-containing protein OS=Entamoeba histolytica HM-1:IMSS OX=294381 GN=EHI_193690 PE=4 SV=1	B1N4Z8	EHI_193690	41 kDa	0	0	0	2.2053	0	0
Asparaginyl-tRNA synthetase, putative OS=Entamoeba histolytica HM-1:IMSS OX=294381 GN=EHI_126920 PE=1 SV=1	C4LWW8 (+2)	EHI_126920	52 kDa	0	0	0	0	0.45853	0
26S proteasome non-ATPase regulatory subunit 14, putative OS=Entamoeba histolytica HM-1:IMSS OX=294381 GN=EHI_164750 PE=4 SV=1	C4M1W8 (+2)	EHI_164750	33 kDa	0	0	0	0	0	0.37401
ELM2 domain-containing protein OS=Entamoeba histolytica HM-1:IMSS OX=294381 GN=EHI_136390 PE=4 SV=1	C4M2A8 (+2)	EHI_136390	15 kDa	0	0	0	0	0	0.37401
Rho family GTPase OS=Entamoeba histolytica HM-1:IMSS OX=294381 GN=EHI_190440 PE=3 SV=1	C4M9T7 (+2)	EHI_190440	22 kDa	0	0	0	0	0	0
High mobility group (HMG) box domain containing protein OS=Entamoeba histolytica HM-1:IMSS OX=294381 GN=EHI_086110 PE=4 SV=1	C4M366 (+2)	EHI_086110	16 kDa	0	0	0	0	0	0.37401
Rab family GTPase OS=Entamoeba histolytica HM-1:IMSS OX=294381 GN=EHI_117890 PE=3 SV=1	C4LYX3 (+2)	EHI_117890	23 kDa	0	0	0	0	0	0
AIG1 family protein OS=Entamoeba histolytica HM-1:IMSS OX=294381 GN=EHI_022500 PE=4 SV=1	C4MBK3	EHI_022500	35 kDa	0	0	0	0.55132	0	0
U3 small nucleolar RNA-associated protein OS=Entamoeba histolytica HM-1:IMSS OX=294381 GN=EHI_138370 PE=4 SV=1	C4M3H9	EHI_138370	79 kDa	0	0	0	0	0	0.37401
SHSP domain-containing protein OS=Entamoeba histolytica HM-1:IMSS OX=294381 GN=EHI_158290 PE=4 SV=1	C4M2E8 (+2)	EHI_158290	23 kDa	0	0	0	0	0	0.37401
Uncharacterized protein OS=Entamoeba histolytica HM-1:IMSS OX=294381 GN=EHI_040370 PE=4 SV=1	C4M2G6 (+2)	EHI_040370	15 kDa	0	0	0	1.1026	0	0
Pre-rRNA-processing protein IPI3 OS=Entamoeba histolytica HM-1:IMSS OX=294381 GN=EHI_137840 PE=4 SV=1	C4LZE5 (+2)	EHI_137840	46 kDa	0	0	0	0	0	0.74802
LMBR1-like membrane protein OS=Entamoeba histolytica HM-1:IMSS OX=294381 GN=EHI_015360 PE=4 SV=1	C4M0X4	EHI_015360	55 kDa	0	0	0	0.55132	0	0
DNA-directed RNA polymerases I and III subunit RPAC1, putative OS=Entamoeba histolytica HM-1:IMSS-A OX=885318 GN=EHI7A_181920 PE=3 SV=1	N9UYV1	EHI7A_181920	33 kDa	0	0	0	0	0	0.37401
Cnd1 domain-containing protein (Fragment) OS=Entamoeba histolytica HM-1:IMSS-B OX=885319 GN=EHI8A_089370 PE=4 SV=1	M3S2H1 (+1)	EHI8A_089370	133 kDa	0	0	0	0	0	0.37401
WD domain containing protein OS=Entamoeba histolytica HM-1:IMSS OX=294381 GN=EHI_151370 PE=4 SV=1	C4LSH9 (+2)	EHI_151370	98 kDa	0	0	0	0	0	0.37401
DEAD/DEAH box helicase, putative OS=Entamoeba histolytica HM-1:IMSS OX=294381 GN=EHI_111040 PE=3 SV=1	C4M5I5	EHI_111040	49 kDa	0	0	0	0	0	0
40S ribosomal protein S28, putative OS=Entamoeba histolytica HM-1:IMSS OX=294381 GN=EHI_038860 PE=3 SV=1	C4LZQ8 (+5)	EHI_038860	8 kDa	0	0	0	0	0	0
Importin alpha, putative OS=Entamoeba histolytica HM-1:IMSS OX=294381 GN=EHI_105090 PE=4 SV=1	C4M114 (+2)	EHI_105090	55 kDa	0	0	0	0	0.45853	0
Nucleosome assembly protein, putative OS=Entamoeba histolytica HM-1:IMSS OX=294381 GN=EHI_139460 PE=3 SV=1	C4M6X1 (+2)	EHI_139460	40 kDa	0	0	0	0	0	0
Coatomer beta subunit, putative OS=Entamoeba histolytica HM-1:IMSS OX=294381 GN=EHI_088220 PE=4 SV=1	A0A8U0WPB4 (+1)	EHI_088220	104 kDa	0	0	0	0	0.91705	0
Transcriptional coactivator, putative OS=Entamoeba histolytica HM-1:IMSS OX=294381 GN=EHI_192520 PE=3 SV=1	C4M1H2 (+2)	EHI_192520	18 kDa	0	0	0	0	0	0
Zf-AD domain-containing protein OS=Entamoeba histolytica HM-1:IMSS OX=294381 GN=EHI_085010 PE=4 SV=1	C4M1L1 (+2)	EHI_085010	28 kDa	0	0	0	0.55132	0	0
Uncharacterized protein OS=Entamoeba histolytica HM-1:IMSS OX=294381 GN=EHI_007930 PE=4 SV=1	C4LYD0 (+2)	EHI_007930	45 kDa	0	0	0	0	0	0
Serine/threonine-protein phosphatase OS=Entamoeba histolytica HM-1:IMSS OX=294381 GN=EHI_031240 PE=3 SV=1	C4M4K6 (+2)	EHI_031240	35 kDa	0	0	0	0	0.45853	0
LIM zinc finger domain containing protein OS=Entamoeba histolytica HM-1:IMSS OX=294381 GN=EHI_110280 PE=4 SV=1	C4LU80	EHI_110280	33 kDa	0	0	0	0	0	0.37401
WWE domain-containing protein OS=Entamoeba histolytica HM-1:IMSS OX=294381 GN=EHI_069610 PE=4 SV=1	C4LWP8 (+2)	EHI_069610	34 kDa	0	0	0	0	0	0
DUF148 domain-containing protein OS=Entamoeba histolytica HM-1:IMSS OX=294381 GN=EHI_114140 PE=4 SV=1	C4M421	EHI_114140	18 kDa	0	0	0	0	0	0
Sas10 domain-containing protein OS=Entamoeba histolytica HM-1:IMSS OX=294381 GN=EHI_099750 PE=3 SV=1	C4M6G9 (+1)	EHI_099750	55 kDa	0	0	0	0	0	1.122
Glycerophosphoryl diester phosphodiesterase, putative OS=Entamoeba histolytica HM-1:IMSS OX=294381 GN=EHI_113970 PE=4 SV=1	C4M8W3 (+2)	EHI_113970	44 kDa	0	0	0	0	0	0.37401
Uncharacterized protein OS=Entamoeba histolytica HM-1:IMSS OX=294381 GN=EHI_082240 PE=4 SV=1	C4M5U6 (+2)	EHI_082240	28 kDa	0	0	0	0.55132	0	0
Protein kinase, putative OS=Entamoeba histolytica HM-1:IMSS OX=294381 GN=EHI_140330 PE=4 SV=1	C4M481	EHI_140330	85 kDa	0	0	0	0	0	0
C2 domain containing protein OS=Entamoeba histolytica HM-1:IMSS OX=294381 GN=EHI_148380 PE=4 SV=1	C4LT08 (+2)	EHI_148380	51 kDa	0	0	0	0.55132	0	0.74802
Beta-hexosaminidase OS=Entamoeba histolytica HM-1:IMSS OX=294381 GN=EHI_007330 PE=3 SV=1	C4M7C8 (+2)	EHI_007330	64 kDa	0	0	0	0	0.91705	0
Rho family GTPase OS=Entamoeba histolytica HM-1:IMSS OX=294381 GN=EHI_146180 PE=3 SV=1	C4M3R0 (+2)	EHI_146180	24 kDa	0	0	0	1.1026	0	0
Phenylalanine--tRNA ligase OS=Entamoeba histolytica HM-1:IMSS OX=294381 GN=EHI_078230 PE=3 SV=1	C4M538 (+2)	EHI_078230	56 kDa	0	0	0	0	1.3756	0
3'-5' exonuclease domain-containing protein OS=Entamoeba histolytica HM-1:IMSS OX=294381 GN=EHI_148670 PE=4 SV=1	C4LT37 (+2)	EHI_148670	32 kDa	0	0	0	0	0	0.37401
Ubiquitin-activating enzyme, putative OS=Entamoeba histolytica HM-1:IMSS OX=294381 GN=EHI_020270 PE=3 SV=1	C4M7T9 (+1)	EHI_020270	112 kDa	0	0	0	0	0	0
Calponin homology domain protein, putative OS=Entamoeba histolytica HM-1:IMSS OX=294381 GN=EHI_189500 PE=4 SV=1	C4M4N4	EHI_189500	117 kDa	0	0	0	1.1026	0	0.74802
RNA helicase OS=Entamoeba histolytica HM-1:IMSS OX=294381 GN=EHI_119920 PE=3 SV=1	C4M986 (+1)	EHI_119920	81 kDa	0	0	0	0	0	0.37401
6-cysteine protein OS=Entamoeba histolytica HM-1:IMSS OX=294381 GN=EHI_069510 PE=4 SV=1	C4LWN9 (+2)	EHI_069510	17 kDa	0	0	0	0	0	0.37401
Histone OS=Entamoeba histolytica HM-1:IMSS OX=294381 GN=EHI_027380 PE=4 SV=1	B1N3D8 (+2)	EHI_027380	24 kDa	0	0	0	0	0	0
Hexokinase OS=Entamoeba histolytica HM-1:IMSS OX=294381 GN=EHI_098560 PE=4 SV=1	A0A8U0WP47	EHI_098560	49 kDa	0	0	0	0	0	0
Uncharacterized protein OS=Entamoeba histolytica HM-1:IMSS OX=294381 GN=EHI_152290 PE=4 SV=1	B1N2F7 (+2)	EHI_152290	14 kDa	0	0	0	0	0.45853	0
Uncharacterized protein OS=Entamoeba histolytica HM-1:IMSS OX=294381 GN=EHI_106240 PE=4 SV=1	A0A8U0WP06 (+2)	EHI_106240	15 kDa	0	0	0	0	0	0.37401
Rab family GTPase OS=Entamoeba histolytica HM-1:IMSS OX=294381 GN=EHI_082070 PE=4 SV=1	A0A8U0WNY7 (+2)	EHI_082070	23 kDa	0	0	0	0	0	0.74802
Uncharacterized protein OS=Entamoeba histolytica HM-1:IMSS OX=294381 GN=EHI_198660 PE=4 SV=1	C4LWR2 (+2)	EHI_198660	27 kDa	0	0	0	0	0.45853	0.37401
Importin beta family protein 3 OS=Entamoeba histolytica HM-1:IMSS OX=294381 GN=EHI_098340 PE=4 SV=1	C4LXB7 (+2)	EHI_098340	125 kDa	0	0	0	0	0	0
Thioredoxin domain-containing protein OS=Entamoeba histolytica HM-1:IMSS OX=294381 GN=EHI_175280 PE=4 SV=1	B1N3J4 (+2)	EHI_175280	60 kDa	0	0	0	0.55132	0	0
Glycosyltransferase, putative OS=Entamoeba histolytica HM-1:IMSS OX=294381 GN=EHI_085980 PE=4 SV=1	C4M353 (+2)	EHI_085980	155 kDa	0	0	0	0	0.45853	0
Serine/threonine-protein phosphatase OS=Entamoeba histolytica HM-1:IMSS OX=294381 GN=EHI_147720 PE=3 SV=1	C4M907 (+1)	EHI_147720	35 kDa	0	0	0	0	0.45853	0
Rab family GTPase OS=Entamoeba histolytica HM-1:IMSS OX=294381 GN=EHI_026420 PE=4 SV=1	A0A8U0WPF5 (+2)	EHI_026420	22 kDa	0	0	0	0.55132	0	0.74802
AIG1 family protein OS=Entamoeba histolytica HM-1:IMSS OX=294381 GN=EHI_176580 PE=4 SV=1	C4MB73	EHI_176580	35 kDa	0	0	0	0	0	0.74802
Uncharacterized protein OS=Entamoeba histolytica HM-1:IMSS OX=294381 GN=EHI_099340 PE=4 SV=1	C4M6C2 (+2)	EHI_099340	20 kDa	0	0	0	0	0.45853	0
DEAD/DEAH box helicase, putative OS=Entamoeba histolytica HM-1:IMSS OX=294381 GN=EHI_014080 PE=4 SV=1	C4LXP7 (+2)	EHI_014080	74 kDa	0	0	0	0	0	0.74802
Uncharacterized protein OS=Entamoeba histolytica HM-1:IMSS OX=294381 GN=EHI_188780 PE=4 SV=1	C4M2U5 (+2)	EHI_188780	18 kDa	0	0	0	0	0.45853	0.37401
DNA-directed RNA polymerase II subunit, putative OS=Entamoeba histolytica HM-1:IMSS OX=294381 GN=EHI_178010 PE=3 SV=1	C4M554 (+2)	EHI_178010	33 kDa	0	0	0	0	0	0
DNA-directed RNA polymerase III subunit RPC5 OS=Entamoeba histolytica HM-1:IMSS OX=294381 GN=EHI_064620 PE=4 SV=1	C4M0C8 (+2)	EHI_064620	64 kDa	0	0	0	0	0	0.74802
HD domain-containing protein OS=Entamoeba histolytica HM-1:IMSS OX=294381 GN=EHI_110510 PE=4 SV=1	C4LUA0 (+1)	EHI_110510	53 kDa	0	0	0	0	0.91705	0.74802
Nucleoporin autopeptidase OS=Entamoeba histolytica HM-1:IMSS OX=294381 GN=EHI_193440 PE=4 SV=1	C4M4U8 (+2)	EHI_193440	29 kDa	0	0	0	0	0	0.37401
Signal recognition particle 54 kDa protein OS=Entamoeba histolytica HM-1:IMSS OX=294381 GN=EHI_004750 PE=3 SV=1	C4M071 (+2)	EHI_004750	54 kDa	0	0	0	0.55132	0	0
Uncharacterized protein OS=Entamoeba histolytica HM-1:IMSS OX=294381 GN=EHI_155340 PE=4 SV=1	C4LW87 (+2)	EHI_155340	24 kDa	0	0	0	0	0.91705	0.37401
RING-type domain-containing protein OS=Entamoeba histolytica HM-1:IMSS OX=294381 GN=EHI_013240 PE=4 SV=1	C4LX90 (+2)	EHI_013240	234 kDa	0	0	0	0	0	0
RNA-binding protein, putative OS=Entamoeba histolytica HM-1:IMSS OX=294381 GN=EHI_151990 PE=4 SV=1	C4LSN8 (+1)	EHI_151990	35 kDa	0	0	0	0	0	0
FAM83 domain-containing protein OS=Entamoeba histolytica HM-1:IMSS OX=294381 GN=EHI_173490 PE=4 SV=1	C4M6I3 (+2)	EHI_173490	43 kDa	0	0	0	0	0	0
Rab family GTPase OS=Entamoeba histolytica HM-1:IMSS OX=294381 GN=EHI_096440 PE=4 SV=1	A0A8U0WPK2 (+2)	EHI_096440	21 kDa	0	0	0	0	0.91705	0.37401
WD domain containing protein OS=Entamoeba histolytica HM-1:IMSS OX=294381 GN=EHI_023870 PE=4 SV=1	C4M7I9 (+2)	EHI_023870	79 kDa	0	0	0	0	0	0
Protein kinase, putative OS=Entamoeba histolytica HM-1:IMSS OX=294381 GN=EHI_057680 PE=4 SV=1	C4M700 (+2)	EHI_057680	122 kDa	0	0	0	0	0.45853	0
DNA-directed RNA polymerase subunit OS=Entamoeba histolytica HM-1:IMSS OX=294381 GN=EHI_044620 PE=3 SV=1	C4LT84	EHI_044620	14 kDa	0	0	0	0	0	0.74802
WD repeat-containing protein OS=Entamoeba histolytica HM-1:IMSS OX=294381 GN=EHI_006060 PE=3 SV=1	C4M2P0 (+2)	EHI_006060	41 kDa	0	0	0	0	0	0.37401
NopRA1 domain-containing protein OS=Entamoeba histolytica HM-1:IMSS OX=294381 GN=EHI_009600 PE=4 SV=1	C4LZ34 (+2)	EHI_009600	192 kDa	0	0	0	0	0	0
Transmembrane protein OS=Entamoeba histolytica HM-1:IMSS OX=294381 GN=EHI_125940 PE=4 SV=1	C4LVX9 (+2)	EHI_125940	29 kDa	0	0	0	0.55132	0.45853	0.37401
RRM domain-containing protein OS=Entamoeba histolytica HM-1:IMSS OX=294381 GN=EHI_135760 PE=4 SV=1	C4M966 (+2)	EHI_135760	13 kDa	0	0	0	0	0.45853	0
Enhancer binding protein 2 (EBP2), putative OS=Entamoeba histolytica HM-1:IMSS OX=294381 GN=EHI_056380 PE=4 SV=1	C4M6Y8 (+2)	EHI_056380	26 kDa	0	0	0	0	0.45853	0
Proteasome subunit beta OS=Entamoeba histolytica HM-1:IMSS OX=294381 GN=EHI_078710 PE=3 SV=1	C4M4F3 (+2)	EHI_078710	22 kDa	0	0	0	0	0	0
Transmembrane protein OS=Entamoeba histolytica HM-1:IMSS OX=294381 GN=EHI_049350 PE=4 SV=1	C4LUD7 (+2)	EHI_049350	62 kDa	0	0	0	0	0	0
U3 small nucleolar ribonucleo protein protein MPP10, putative OS=Entamoeba histolytica HM-1:IMSS OX=294381 GN=EHI_048860 PE=3 SV=1	B1N5H2 (+3)	EHI_048860	25 kDa	0	0	0	0	0	0
Meiotic check point regulator, putative OS=Entamoeba histolytica HM-1:IMSS OX=294381 GN=EHI_189910 PE=4 SV=1	C4M722 (+2)	EHI_189910	91 kDa	0	0	0	0.55132	0	0.37401
IgGFc_binding domain-containing protein OS=Entamoeba histolytica HM-1:IMSS OX=294381 GN=EHI_000710 PE=4 SV=1	C4LZC0 (+2)	EHI_000710	103 kDa	0	0	0	0	0	0.37401
Transcriptional regulator OS=Entamoeba histolytica HM-1:IMSS-B OX=885319 GN=EHI8A_061100 PE=4 SV=1	M3U186 (+1)	EHI8A_061100	22 kDa	0	0	0	0	0.45853	0
Elongation factor-2 kinase, putative OS=Entamoeba histolytica HM-1:IMSS OX=294381 GN=EHI_090240 PE=4 SV=1	C4M8H2 (+2)	EHI_090240	46 kDa	0	0	0	0	0	0.37401
AB hydrolase-1 domain-containing protein OS=Entamoeba histolytica HM-1:IMSS OX=294381 GN=EHI_016410 PE=4 SV=1	C4M3W3 (+2)	EHI_016410	56 kDa	0	0	0	0	0	0.37401
Uncharacterized protein OS=Entamoeba histolytica HM-1:IMSS OX=294381 GN=EHI_134670 PE=4 SV=1	C4M016 (+2)	EHI_134670	33 kDa	0	0	0	0	0	0.37401
Calcium-transporting ATPase OS=Entamoeba histolytica HM-1:IMSS OX=294381 GN=EHI_030830 PE=3 SV=1	C4M1F1 (+2)	EHI_030830	114 kDa	0	0	0	0.55132	0.45853	0.37401
Damaged DNA binding protein, putative OS=Entamoeba histolytica HM-1:IMSS OX=294381 GN=EHI_194860 PE=3 SV=1	C4M401 (+2)	EHI_194860	124 kDa	0	0	0	0	0	0.37401
Ragulator complex protein LAMTOR1 OS=Entamoeba histolytica HM-1:IMSS OX=294381 GN=EHI_142900 PE=4 SV=1	C4M6D7 (+2)	EHI_142900	17 kDa	0	0	0	0	0.45853	0
Ras family GTPase OS=Entamoeba histolytica HM-1:IMSS OX=294381 GN=EHI_004860 PE=3 SV=1	C4M081 (+2)	EHI_004860	21 kDa	0	0	0	0	0	0
GTP-binding protein, putative OS=Entamoeba histolytica HM-1:IMSS OX=294381 GN=EHI_178770 PE=3 SV=1	C4LUU1 (+2)	EHI_178770	36 kDa	0	0	0	0.55132	0	0.37401
TPR_REGION domain-containing protein OS=Entamoeba histolytica HM-1:IMSS OX=294381 GN=EHI_118470 PE=4 SV=1	C4LYK8 (+2)	EHI_118470	59 kDa	0	0	0	0	0	0.37401
Dolichyl-diphosphooligosaccharide--protein glycosyltransferase subunit 1 OS=Entamoeba histolytica HM-1:IMSS OX=294381 GN=EHI_093790 PE=3 SV=1	C4LYH0	EHI_093790	49 kDa	0	0	0	0	0	0.37401
C2 NT-type domain-containing protein OS=Entamoeba histolytica HM-1:IMSS OX=294381 GN=EHI_169670 PE=4 SV=1	C4M8U8 (+2)	EHI_169670	99 kDa	0	0	0	0	0	0.37401
Importin N-terminal domain-containing protein OS=Entamoeba histolytica HM-1:IMSS OX=294381 GN=EHI_164410 PE=3 SV=1	C4M1S3 (+1)	EHI_164410	110 kDa	0	0	0	0	0	0.37401
DEAD/DEAH box helicase, putative OS=Entamoeba histolytica HM-1:IMSS OX=294381 GN=EHI_165110 PE=3 SV=1	C4M1Z3 (+2)	EHI_165110	64 kDa	0	0	0	0	0	0
KID repeat-containing protein OS=Entamoeba histolytica HM-1:IMSS-A OX=885318 GN=EHI7A_102720 PE=4 SV=1	N9V3T3	EHI7A_102720	197 kDa	0	0	0	0.55132	0	0
Uncharacterized protein OS=Entamoeba histolytica HM-1:IMSS OX=294381 GN=EHI_104740 PE=4 SV=1	C4LZ82 (+2)	EHI_104740	22 kDa	0	0	0	0	0.45853	0
Inositol-3-phosphate synthase OS=Entamoeba histolytica HM-1:IMSS OX=294381 GN=EHI_070720 PE=3 SV=1	C4M5S9	EHI_070720	57 kDa	0	0	0	0.55132	0	0
Uncharacterized protein OS=Entamoeba histolytica HM-1:IMSS OX=294381 GN=EHI_168230 PE=3 SV=1	C4M4Q9 (+2)	EHI_168230	25 kDa	0	0	0	0	0	0.37401
Actin-like protein OS=Entamoeba histolytica HM-1:IMSS OX=294381 GN=EHI_060390 PE=4 SV=1	C4M6J4 (+2)	EHI_060390	62 kDa	0	0	0	0	0	0.37401
Erf4 domain-containing protein OS=Entamoeba histolytica HM-1:IMSS OX=294381 GN=EHI_111030 PE=4 SV=1	C4LT62	EHI_111030	15 kDa	0	0	0	0	0	0.74802
PHD-type domain-containing protein OS=Entamoeba histolytica HM-1:IMSS OX=294381 GN=EHI_153030 PE=4 SV=1	B1N2D5	EHI_153030	80 kDa	0	0	0	0.55132	0	0.37401
Importin beta-3 family protein, putative OS=Entamoeba histolytica HM-1:IMSS OX=294381 GN=EHI_081250 PE=4 SV=1	C4M5B0 (+2)	EHI_081250	123 kDa	0	0	0	0	0	0
CULLIN_2 domain-containing protein OS=Entamoeba histolytica HM-1:IMSS OX=294381 GN=EHI_179950 PE=3 SV=1	C4M646 (+2)	EHI_179950	74 kDa	0	0	0	0	0	0
Phospholipase B-like OS=Entamoeba histolytica HM-1:IMSS OX=294381 GN=EHI_069380 PE=3 SV=1	C4LWM6 (+2)	EHI_069380	61 kDa	0	0	0	0	0.45853	0
Mediator complex subunit 15 OS=Entamoeba histolytica HM-1:IMSS OX=294381 GN=EHI_135020 PE=3 SV=1	C4M0Y9 (+2)	EHI_135020	40 kDa	0	0	0	0	0.45853	0
Exportin-T OS=Entamoeba histolytica HM-1:IMSS OX=294381 GN=EHI_029040 PE=3 SV=1	C4M4W8 (+1)	EHI_029040	105 kDa	0	0	0	0	0	0
Short chain dehydrogenase family protein OS=Entamoeba histolytica HM-1:IMSS OX=294381 GN=EHI_165070 PE=3 SV=1	C4M1Y9 (+2)	EHI_165070	37 kDa	0	0	0	1.654	0	0
MRG domain-containing protein OS=Entamoeba histolytica HM-1:IMSS OX=294381 GN=EHI_067880 PE=4 SV=1	C4LTY4 (+2)	EHI_067880	26 kDa	0	0	0	0	0.45853	0
Uncharacterized protein OS=Entamoeba histolytica HM-1:IMSS OX=294381 GN=EHI_001140 PE=4 SV=1	C4M1J4 (+2)	EHI_001140	42 kDa	0	0	0	0	0	0.74802
Uncharacterized protein OS=Entamoeba histolytica HM-1:IMSS OX=294381 GN=EHI_062960 PE=4 SV=1	C4M8G4	EHI_062960	24 kDa	0	0	0	0	0	0
Importin beta-3 subunit family protein, putative OS=Entamoeba histolytica HM-1:IMSS OX=294381 GN=EHI_196970 PE=4 SV=1	C4LVB5 (+2)	EHI_196970	109 kDa	0	0	0	0	0	0.37401
CAP-Gly domain-containing protein OS=Entamoeba histolytica HM-1:IMSS OX=294381 GN=EHI_051740 PE=4 SV=1	C4LY70	EHI_051740	41 kDa	0	0	0	0	0	0.37401
BRCT domain-containing protein OS=Entamoeba histolytica HM-1:IMSS OX=294381 GN=EHI_074030 PE=4 SV=1	C4M2Z2 (+2)	EHI_074030	82 kDa	0	0	0	0	0	0
Filopodin, putative OS=Entamoeba histolytica HM-1:IMSS OX=294381 GN=EHI_167130 PE=4 SV=1	C4LYB3 (+2)	EHI_167130	180 kDa	0	0	0	0	0	0
DNMT1-RFD domain-containing protein OS=Entamoeba histolytica HM-1:IMSS OX=294381 GN=EHI_078540 PE=4 SV=1	B1N3P6	EHI_078540	15 kDa	0	0	0	0	0	0
RNA recognition motif domain containing protein OS=Entamoeba histolytica HM-1:IMSS OX=294381 GN=EHI_014120 PE=4 SV=1	C4LXQ1 (+2)	EHI_014120	79 kDa	0	0	0	0	0	0.74802
U3 small nucleolar ribonucleoprotein protein IMP4, putative OS=Entamoeba histolytica HM-1:IMSS OX=294381 GN=EHI_004900 PE=4 SV=1	C4M085 (+2)	EHI_004900	32 kDa	0	0	0	0	0	1.122
Bee-milk protein OS=Entamoeba histolytica HM-1:IMSS OX=294381 GN=EHI_141330 PE=4 SV=1	C4LW18	EHI_141330	51 kDa	0	0	0	0	0	0.37401
Claudin OS=Entamoeba histolytica HM-1:IMSS OX=294381 GN=EHI_169900 PE=4 SV=1	C4M1B3 (+2)	EHI_169900	21 kDa	0	0	0	0	0	0
Thioredoxin domain-containing protein OS=Entamoeba histolytica HM-1:IMSS OX=294381 GN=EHI_017000 PE=4 SV=1	C4MAK2 (+2)	EHI_017000	65 kDa	0	0	0	0.55132	0.45853	0
Proteasome regulatory subunit, putative OS=Entamoeba histolytica HM-1:IMSS OX=294381 GN=EHI_179970 PE=4 SV=1	C4M648 (+2)	EHI_179970	54 kDa	0	0	0	0	0	0
Uncharacterized protein OS=Entamoeba histolytica HM-1:IMSS OX=294381 GN=EHI_138470 PE=4 SV=1	C4M3I9 (+2)	EHI_138470	19 kDa	0	0	0	0.55132	0.45853	0
N-acetylmuraminidase OS=Entamoeba histolytica HM-1:IMSS OX=294381 GN=EHI_014400 PE=4 SV=1	C4LXS4 (+2)	EHI_014400	24 kDa	0	0	0	0.55132	0	0
Rab family GTPase OS=Entamoeba histolytica HM-1:IMSS OX=294381 GN=EHI_117960 PE=4 SV=1	A0A8U0WP66 (+2)	EHI_117960	21 kDa	0	0	0	0	0	0
Heat shock protein 70, mitochondrial, putative OS=Entamoeba histolytica HM-1:IMSS OX=294381 GN=EHI_127700 PE=3 SV=1	B1N4X0	EHI_127700	67 kDa	0	0	0	0	0.45853	0.37401
TPR-like protein OS=Entamoeba histolytica HM-1:IMSS OX=294381 GN=EHI_098390 PE=4 SV=1	C4LXC1 (+2)	EHI_098390	69 kDa	0	0	0	0	0	0
Variant sh3 domain containing protein OS=Entamoeba histolytica HM-1:IMSS OX=294381 GN=EHI_110690 PE=4 SV=1	C4LUB6 (+2)	EHI_110690	42 kDa	0	0	0	0	0.45853	0.74802
G2/mitotic-specific cyclin-B3 OS=Entamoeba histolytica HM-1:IMSS OX=294381 GN=EHI_030880 PE=3 SV=1	C4M1F5 (+2)	EHI_030880	35 kDa	0	0	0	0	0	0
Cylicin-2 OS=Entamoeba histolytica HM-1:IMSS OX=294381 GN=EHI_107170 PE=4 SV=1	C4M158 (+2)	EHI_107170	50 kDa	0	0	0	1.1026	0.91705	0
RNA recognition motif domain containing protein OS=Entamoeba histolytica HM-1:IMSS OX=294381 GN=EHI_183240 PE=4 SV=1	C4LV95 (+2)	EHI_183240	23 kDa	0	0	0	0	0	0.37401
Uncharacterized protein OS=Entamoeba histolytica HM-1:IMSS OX=294381 GN=EHI_194370 PE=4 SV=1	C4LZV0 (+2)	EHI_194370	33 kDa	0	0	0	0	0	0
Ricin B-type lectin domain-containing protein OS=Entamoeba histolytica HM-1:IMSS OX=294381 GN=EHI_175040 PE=4 SV=1	C4LZM9 (+2)	EHI_175040	67 kDa	0	0	0	0.55132	0	0.37401
Uncharacterized protein OS=Entamoeba histolytica HM-1:IMSS-B OX=885319 GN=EHI8A_098210 PE=4 SV=1	M3TR94	EHI8A_098210	20 kDa	0	0	0	0	0.45853	0
Mic1 domain-containing protein OS=Entamoeba histolytica HM-1:IMSS OX=294381 GN=EHI_140680 PE=4 SV=1	C4M3P0 (+2)	EHI_140680	75 kDa	0	0	0	0	0	0
RAP domain-containing protein OS=Entamoeba histolytica HM-1:IMSS OX=294381 GN=EHI_176160 PE=4 SV=1	C4MB23 (+2)	EHI_176160	86 kDa	0	0	0	0	0	0.37401
60S acidic ribosomal protein P1, putative OS=Entamoeba histolytica HM-1:IMSS OX=294381 GN=EHI_104660 PE=3 SV=1	C4LZ75 (+2)	EHI_104660	11 kDa	0	0	0	0	0	0
Serine O-acetyltransferase OS=Entamoeba histolytica HM-1:IMSS-B OX=885319 GN=EHI8A_063040 PE=3 SV=1	M3S676 (+1)	EHI8A_063040	34 kDa	0	3.5464	0	0	0	0
Uncharacterized protein OS=Entamoeba histolytica HM-1:IMSS OX=294381 GN=EHI_032780 PE=4 SV=1	B1N413 (+2)	EHI_032780	12 kDa	0	0	0	0	0	0.37401
AATF-Che1 domain-containing protein OS=Entamoeba histolytica HM-1:IMSS OX=294381 GN=EHI_142050 PE=4 SV=1	C4LW50 (+1)	EHI_142050	46 kDa	0	0	0	0	0	0.74802
Coatomer alpha subunit, putative OS=Entamoeba histolytica HM-1:IMSS OX=294381 GN=EHI_088090 PE=4 SV=1	A0A8U0WPY0 (+2)	EHI_088090	90 kDa	0	0	0	0	0	0.37401
NPL domain-containing protein OS=Entamoeba histolytica HM-1:IMSS OX=294381 GN=EHI_147550 PE=4 SV=1	C4M6L9 (+2)	EHI_147550	31 kDa	0	0	0	0	0	0
Uncharacterized protein OS=Entamoeba histolytica HM-1:IMSS OX=294381 GN=EHI_178470 PE=4 SV=1	C4LUR3 (+2)	EHI_178470	98 kDa	0	0	0	0	0	0
FACT complex subunit OS=Entamoeba histolytica HM-1:IMSS OX=294381 GN=EHI_109860 PE=3 SV=1	C4M3K5 (+2)	EHI_109860	93 kDa	0	0	0	0	0	0.37401
SHSP domain-containing protein OS=Entamoeba histolytica HM-1:IMSS OX=294381 GN=EHI_184220 PE=3 SV=1	C4M9Z8 (+2)	EHI_184220	61 kDa	0	0	0	0	0	0
Insulin-like growth factor 2 receptor OS=Entamoeba histolytica HM-1:IMSS OX=294381 GN=EHI_012340 PE=4 SV=1	C4LTM7 (+2)	EHI_012340	98 kDa	0	0	0	0	0	0
Autotransporter domain-containing protein OS=Entamoeba histolytica HM-1:IMSS OX=294381 GN=EHI_099780 PE=4 SV=1	C4M6F8 (+2)	EHI_099780	97 kDa	0	0	0	0	0	0
Protein tyrosine kinase domain-containing protein OS=Entamoeba histolytica HM-1:IMSS OX=294381 GN=EHI_197350 PE=4 SV=1	C4LVF1 (+2)	EHI_197350	121 kDa	0	0	0	0	0.45853	0
MFS domain-containing protein OS=Entamoeba histolytica HM-1:IMSS OX=294381 GN=EHI_194990 PE=4 SV=1	C4M404 (+2)	EHI_194990	65 kDa	0	0	0	0	0	0
Thioredoxin, putative OS=Entamoeba histolytica HM-1:IMSS OX=294381 GN=EHI_105860 PE=4 SV=1	C4M9H2 (+2)	EHI_105860	13 kDa	0	0	0	0	0.45853	0
rRNA-processing protein FYV7 OS=Entamoeba histolytica HM-1:IMSS OX=294381 GN=EHI_140020 PE=4 SV=1	C4M960 (+2)	EHI_140020	21 kDa	0	0	0	1.1026	0	0.37401
Signal recognition particle GTPase OS=Entamoeba histolytica HM-1:IMSS OX=294381 GN=EHI_110600 PE=4 SV=1	C4LUA9 (+2)	EHI_110600	12 kDa	0	0	0	0	0	0
Mob1/phocein family protein OS=Entamoeba histolytica HM-1:IMSS OX=294381 GN=EHI_148520 PE=4 SV=1	C4LT22 (+2)	EHI_148520	25 kDa	0	0	0	0	0	0
PH domain protein OS=Entamoeba histolytica HM-1:IMSS OX=294381 GN=EHI_127260 PE=4 SV=1	C4LWZ8 (+1)	EHI_127260	24 kDa	0	0	0	0	0	0.37401
Protein MAK16 homolog OS=Entamoeba histolytica HM-1:IMSS OX=294381 GN=EHI_198690 PE=3 SV=1	C4LWR5 (+2)	EHI_198690	32 kDa	0	0	0	0	0	0
Uncharacterized protein OS=Entamoeba histolytica HM-1:IMSS OX=294381 GN=EHI_113940 PE=4 SV=1	C4M8W0 (+1)	EHI_113940	38 kDa	0	0	0	0.55132	0	0
Importin subunit alpha-2 OS=Entamoeba histolytica HM-1:IMSS OX=294381 GN=EHI_087620 PE=4 SV=1	C4LXU4 (+2)	EHI_087620	56 kDa	0	0	0	0	0	0
Importin subunit alpha OS=Entamoeba histolytica HM-1:IMSS OX=294381 GN=EHI_078270 PE=4 SV=1	C4M542 (+2)	EHI_078270	86 kDa	0	0	0	0	0	0.37401
Retinoblatoma-binding protein 6, putative OS=Entamoeba histolytica HM-1:IMSS OX=294381 GN=EHI_014000 PE=4 SV=1	C4LXP1 (+2)	EHI_014000	45 kDa	0	0	0	0	0	0
VWFA domain-containing protein OS=Entamoeba histolytica HM-1:IMSS OX=294381 GN=EHI_096810 PE=4 SV=1	C4LWJ1 (+2)	EHI_096810	54 kDa	0	0	0	0	0	0.37401
Transporter, major facilitator family OS=Entamoeba histolytica HM-1:IMSS OX=294381 GN=EHI_051720 PE=4 SV=1	C4LY68	EHI_051720	59 kDa	0	0	0	0	0	0.37401
Rab GDP dissociation inhibitor OS=Entamoeba histolytica HM-1:IMSS OX=294381 GN=EHI_167060 PE=3 SV=1	B1N309 (+1)	EHI_167060	49 kDa	0	0	0	0	0	0
Protein kinase domain containing protein OS=Entamoeba histolytica HM-1:IMSS OX=294381 GN=EHI_166470 PE=4 SV=1	C4M7F3	EHI_166470	38 kDa	0	0	0	0	0	0
DH domain-containing protein OS=Entamoeba histolytica HM-1:IMSS OX=294381 GN=EHI_148600 PE=4 SV=1	C4LT30 (+2)	EHI_148600	100 kDa	0	0	0	0	0	0
Uncharacterized protein OS=Entamoeba histolytica HM-1:IMSS OX=294381 GN=EHI_098800 PE=4 SV=1	C4M882 (+2)	EHI_098800	41 kDa	0	0	0	0	0.45853	0
HEAT repeat domain containing protein OS=Entamoeba histolytica HM-1:IMSS OX=294381 GN=EHI_097470 PE=4 SV=1	C4M930 (+2)	EHI_097470	118 kDa	0	0	0	0	0.45853	0
Protein kinase domain-containing protein OS=Entamoeba histolytica HM-1:IMSS OX=294381 GN=EHI_058120 PE=4 SV=1	C4M8B3 (+2)	EHI_058120	59 kDa	0	0	0	0	0	0
tRNA (guanine(46)-N(7))-methyltransferase OS=Entamoeba histolytica HM-1:IMSS OX=294381 GN=EHI_128170 PE=4 SV=1	B1N3S7 (+2)	EHI_128170	62 kDa	0	0	0	0	0	0.37401
Actin, putative OS=Entamoeba histolytica HM-1:IMSS OX=294381 GN=EHI_163580 PE=3 SV=1	C4M3T9 (+2)	EHI_163580	41 kDa	0	0	0	0.55132	0	0
TFIIB-type domain-containing protein OS=Entamoeba histolytica HM-1:IMSS OX=294381 GN=EHI_126050 PE=4 SV=1	C4LVZ0 (+2)	EHI_126050	106 kDa	0	0	0	0	0	0.74802
DnaJ_C domain-containing protein OS=Entamoeba histolytica HM-1:IMSS OX=294381 GN=EHI_110820 PE=4 SV=1	C4LUC8	EHI_110820	56 kDa	0	0	0	0	0.45853	0
Dilute domain-containing protein OS=Entamoeba histolytica HM-1:IMSS OX=294381 GN=EHI_192140 PE=4 SV=1	C4M754 (+2)	EHI_192140	67 kDa	0	0	0	0	0	0
F_actin_bund_C domain-containing protein OS=Entamoeba histolytica HM-1:IMSS OX=294381 GN=EHI_189930 PE=4 SV=1	C4M711 (+2)	EHI_189930	25 kDa	0	0	0	0.55132	0	0
Nucleolar protein 12 OS=Entamoeba histolytica HM-1:IMSS OX=294381 GN=EHI_137710 PE=3 SV=1	C4LZD4 (+2)	EHI_137710	48 kDa	0	0	0	0	0	0
Uncharacterized protein OS=Entamoeba histolytica HM-1:IMSS OX=294381 GN=EHI_080860 PE=4 SV=1	C4MAD4 (+2)	EHI_080860	48 kDa	0	0	0	0	0	0
Myotubularin phosphatase domain-containing protein OS=Entamoeba histolytica HM-1:IMSS OX=294381 GN=EHI_016360 PE=4 SV=1	C4M3V8 (+2)	EHI_016360	67 kDa	0	0	0	0	0	0
Longin-type vesicle-associated membrane protein, putative OS=Entamoeba histolytica HM-1:IMSS OX=294381 GN=EHI_170040 PE=4 SV=1	A0A8U0WPP3 (+2)	EHI_170040	26 kDa	0	0	0	0	0	0.37401
t-SNARE coiled-coil homology domain-containing protein OS=Entamoeba histolytica HM-1:IMSS-A OX=885318 GN=EHI7A_168250 PE=4 SV=1	N9TG06	EHI7A_168250	13 kDa	0	0	0	0	0	0.74802
Rho GTPase activating protein, putative OS=Entamoeba histolytica HM-1:IMSS OX=294381 GN=EHI_035940 PE=4 SV=1	C4M7G0 (+1)	EHI_035940	62 kDa	0	0	0	0.55132	0	0.74802
Isoleucine--tRNA ligase OS=Entamoeba histolytica HM-1:IMSS OX=294381 GN=EHI_177660 PE=3 SV=1	C4LY19 (+2)	EHI_177660	123 kDa	0	0	0	0	0	0
Coatomer protein gamma subunit, putative OS=Entamoeba histolytica HM-1:IMSS OX=294381 GN=EHI_040700 PE=4 SV=1	A0A8U0WPW7 (+2)	EHI_040700	95 kDa	0	0	0	0	0.45853	0
ATP-dependent helicase, putative OS=Entamoeba histolytica HM-1:IMSS OX=294381 GN=EHI_077640 PE=4 SV=1	C4M8N6 (+1)	EHI_077640	105 kDa	0	0	0	0	0	0.37401
Uncharacterized protein OS=Entamoeba histolytica HM-1:IMSS OX=294381 GN=EHI_065710 PE=4 SV=1	C4LZY7 (+2)	EHI_065710	22 kDa	0	0	0	0	0	0
Protein HIRA OS=Entamoeba histolytica HM-1:IMSS OX=294381 GN=EHI_131950 PE=3 SV=1	C4M5F1 (+2)	EHI_131950	95 kDa	0	0	0	0	0	0.37401
PCTP-like protein, putative OS=Entamoeba histolytica HM-1:IMSS OX=294381 GN=EHI_110720 PE=4 SV=1	C4LUB9 (+1)	EHI_110720	31 kDa	0	0	0	0	0	0
COP9 signalosome complex subunit 1, putative OS=Entamoeba histolytica HM-1:IMSS OX=294381 GN=EHI_182890 PE=4 SV=1	A0A8U0WPD1 (+2)	EHI_182890	45 kDa	0	0	0	0	0	0
Phospholipid-transporting ATPase OS=Entamoeba histolytica HM-1:IMSS OX=294381 GN=EHI_140130 PE=3 SV=1	C4M462 (+2)	EHI_140130	152 kDa	0	0	0	0	0	0.74802
26S protease regulatory subunit, putative OS=Entamoeba histolytica HM-1:IMSS OX=294381 GN=EHI_194570 PE=3 SV=1	C4LZW8 (+2)	EHI_194570	44 kDa	0	0	0	0.55132	0	0
DNA-directed RNA polymerase I subunit RPA43 OS=Entamoeba histolytica HM-1:IMSS OX=294381 GN=EHI_124360 PE=4 SV=1	B1N352 (+2)	EHI_124360	24 kDa	0	0	0	0	0	0
Glycosylphosphatidylinositol anchor attachment 1 protein OS=Entamoeba histolytica HM-1:IMSS OX=294381 GN=EHI_196400 PE=4 SV=1	C4M9R2 (+2)	EHI_196400	68 kDa	0	0	0	0.55132	0	0
Ribosome biogenesis regulatory protein OS=Entamoeba histolytica HM-1:IMSS-B OX=885319 GN=EHI8A_140470 PE=4 SV=1	M3TLZ8 (+1)	EHI8A_140470	23 kDa	0	0	0	0	0	0
Vacuolar protein sorting 35, putative OS=Entamoeba histolytica HM-1:IMSS OX=294381 GN=EHI_041950 PE=3 SV=1	C4M4G0 (+2)	EHI_041950	85 kDa	0	0	0	0.55132	0	0.74802
Nuclear cap-binding protein subunit 2 OS=Entamoeba histolytica HM-1:IMSS OX=294381 GN=EHI_156270 PE=3 SV=1	C4M4C7 (+2)	EHI_156270	22 kDa	0	0	0	0	0	0.37401
ATPase, AAA family protein OS=Entamoeba histolytica HM-1:IMSS OX=294381 GN=EHI_081930 PE=4 SV=1	C4M5T5 (+2)	EHI_081930	106 kDa	0	0	0	0	0	0.37401
DEK_C domain-containing protein OS=Entamoeba histolytica HM-1:IMSS OX=294381 GN=EHI_165130 PE=4 SV=1	C4M1Z5 (+2)	EHI_165130	32 kDa	0	0	0	0	0	0
Protein kinase domain containing protein OS=Entamoeba histolytica HM-1:IMSS OX=294381 GN=EHI_081790 PE=4 SV=1	C4M695	EHI_081790	133 kDa	0	0	0	0	0	0
Helicase ATP-binding domain-containing protein OS=Entamoeba histolytica HM-1:IMSS OX=294381 GN=EHI_009670 PE=4 SV=1	C4LZ41 (+2)	EHI_009670	129 kDa	0	0	0	0	0	0.74802
DNA-directed RNA polymerase III subunit RPC9 OS=Entamoeba histolytica HM-1:IMSS OX=294381 GN=EHI_038850 PE=4 SV=1	B1N361 (+2)	EHI_038850	14 kDa	0	0	0	0	0	0.37401
Proteasome regulatory subunit, putative OS=Entamoeba histolytica HM-1:IMSS OX=294381 GN=EHI_054230 PE=4 SV=1	C4M6T7 (+2)	EHI_054230	32 kDa	0	0	0	0	0	0
GOLD domain-containing protein OS=Entamoeba histolytica HM-1:IMSS OX=294381 GN=EHI_138080 PE=3 SV=1	C4LZG8 (+2)	EHI_138080	23 kDa	0	0	0	0	0	0
PINc domain-containing protein OS=Entamoeba histolytica HM-1:IMSS OX=294381 GN=EHI_056460 PE=3 SV=1	C4M6Z5 (+2)	EHI_056460	22 kDa	0	0	0	0	0	0
Rab family GTPase OS=Entamoeba histolytica HM-1:IMSS OX=294381 GN=EHI_128110 PE=4 SV=1	A0A8U0WQ17 (+2)	EHI_128110	26 kDa	0	0	0	0	0	0.37401
Thioredoxin, putative OS=Entamoeba histolytica HM-1:IMSS OX=294381 GN=EHI_170420 PE=4 SV=1	C4M7K9 (+2)	EHI_170420	13 kDa	0	0	0	0	0	0
Rho guanine nucleotide exchange factor, putative OS=Entamoeba histolytica HM-1:IMSS OX=294381 GN=EHI_039480 PE=4 SV=1	C4M8C8 (+2)	EHI_039480	96 kDa	0	0	0	0.55132	0.45853	0
Phosphatidylinositol 3-kinase, putative OS=Entamoeba histolytica HM-1:IMSS OX=294381 GN=EHI_095130 PE=3 SV=1	C4M4S6 (+2)	EHI_095130	130 kDa	0	0	0	0	0	0.37401
RRM domain-containing protein OS=Entamoeba histolytica HM-1:IMSS OX=294381 GN=EHI_138050 PE=4 SV=1	C4LZG5 (+2)	EHI_138050	28 kDa	0	0	0	0	0	0
Calcineurin B subunit, putative OS=Entamoeba histolytica HM-1:IMSS OX=294381 GN=EHI_106670 PE=3 SV=1	C4MBI6 (+2)	EHI_106670	21 kDa	0	0	0	0	0.45853	0
WD domain containing protein OS=Entamoeba histolytica HM-1:IMSS OX=294381 GN=EHI_103410 PE=4 SV=1	A0A8U0WQ03 (+1)	EHI_103410	111 kDa	0	0	0	0	0.45853	0
RGS domain-containing protein OS=Entamoeba histolytica HM-1:IMSS OX=294381 GN=EHI_174120 PE=4 SV=1	C4M260 (+2)	EHI_174120	52 kDa	0	0	0	0	0.45853	0.37401
WD_REPEATS_REGION domain-containing protein OS=Entamoeba histolytica HM-1:IMSS-B OX=885319 GN=EHI8A_179760 PE=3 SV=1	M3U5P6	EHI8A_179760	72 kDa	0	0	0	0.55132	0	0
Rap/Ran GTPase-activating protein OS=Entamoeba histolytica HM-1:IMSS OX=294381 GN=EHI_143610 PE=4 SV=1	C4M807 (+2)	EHI_143610	77 kDa	0	0	0	0	0	0
Molybdenum cofactor sulfurase putative OS=Entamoeba histolytica HM-1:IMSS OX=294381 GN=EHI_194600 PE=4 SV=1	C4LZX1 (+2)	EHI_194600	60 kDa	0	0	0	0	0.45853	0
Chaperonin 10 Kd subunit, putative OS=Entamoeba histolytica HM-1:IMSS OX=294381 GN=EHI_188880 PE=4 SV=1	A0A8U0WPX4 (+2)	EHI_188880	10 kDa	0	3.5464	0	0	0	0
SMK-1 domain-containing protein OS=Entamoeba histolytica HM-1:IMSS-B OX=885319 GN=EHI8A_006710 PE=4 SV=1	M3SEF2	EHI8A_006710	104 kDa	0	0	0	0	0	0
Uncharacterized protein OS=Entamoeba histolytica HM-1:IMSS OX=294381 GN=EHI_023490 PE=4 SV=1	C4LUQ8 (+2)	EHI_023490	68 kDa	0	0	0	0	0	0.37401
RNA recognition motif domain containing protein OS=Entamoeba histolytica HM-1:IMSS OX=294381 GN=EHI_092500 PE=4 SV=1	C4LV12 (+1)	EHI_092500	46 kDa	0	0	0	0	0	0
WD domain containing protein OS=Entamoeba histolytica HM-1:IMSS OX=294381 GN=EHI_168370 PE=4 SV=1	C4M4P7 (+2)	EHI_168370	58 kDa	0	0	0	0	0.45853	1.122
60S acidic riboomal protein P1, putative OS=Entamoeba histolytica HM-1:IMSS OX=294381 GN=EHI_042920 PE=3 SV=1	C4M660 (+2)	EHI_042920	11 kDa	0	0	0	0	0	0
Importin alpha subunit, putative OS=Entamoeba histolytica HM-1:IMSS OX=294381 GN=EHI_131550 PE=4 SV=1	C4M9Y6 (+2)	EHI_131550	59 kDa	0	0	0	0	0	0.37401
Ferric oxidoreductase domain-containing protein OS=Entamoeba histolytica HM-1:IMSS OX=294381 GN=EHI_170000 PE=4 SV=1	C4M1C2 (+2)	EHI_170000	61 kDa	0	0	0	0.55132	0	0.74802
Soluble NSF attachment protein gamma isoform, putative OS=Entamoeba histolytica HM-1:IMSS OX=294381 GN=EHI_136210 PE=3 SV=1	C4M2A1 (+2)	EHI_136210	41 kDa	0	0	0	0.55132	0	0.37401
3' exoribonuclease family protein OS=Entamoeba histolytica HM-1:IMSS OX=294381 GN=EHI_040320 PE=4 SV=1	C4M2G1 (+2)	EHI_040320	27 kDa	0	0	0	0	0	0.37401
Eukaryotic translation initiation factor 5B OS=Entamoeba histolytica HM-1:IMSS OX=294381 GN=EHI_127340 PE=4 SV=1	C4LX06 (+2)	EHI_127340	102 kDa	0	0	0	0	0.45853	0
Importin N-terminal domain-containing protein OS=Entamoeba histolytica HM-1:IMSS OX=294381 GN=EHI_126230 PE=3 SV=1	C4LW08 (+2)	EHI_126230	113 kDa	0	0	0	0	0	0
Papain family cysteine protease domain containing protein OS=Entamoeba histolytica HM-1:IMSS OX=294381 GN=EHI_050800 PE=4 SV=1	C4LTV0 (+2)	EHI_050800	65 kDa	0	0	0	0	0	0.37401
DNA-directed RNA polymerase II subunit, putative OS=Entamoeba histolytica HM-1:IMSS OX=294381 GN=EHI_131150 PE=4 SV=1	C4LXI3 (+2)	EHI_131150	20 kDa	0	0	0	0	0	0
Ras family GTPase OS=Entamoeba histolytica HM-1:IMSS OX=294381 GN=EHI_091090 PE=3 SV=1	C4M7P6 (+2)	EHI_091090	23 kDa	0	0	0	0.55132	0	0
3-ketoacyl-CoA synthase OS=Entamoeba histolytica HM-1:IMSS OX=294381 GN=EHI_158240 PE=3 SV=1	C4M2E3	EHI_158240	57 kDa	0	0	0	0.55132	0	0
Fe-hydrogenase, putative OS=Entamoeba histolytica HM-1:IMSS OX=294381 GN=EHI_073390 PE=3 SV=1	C4LXK4 (+2)	EHI_073390	51 kDa	0	0	0	0	0	0
Ubiquitin-conjugating enzyme family protein OS=Entamoeba histolytica HM-1:IMSS OX=294381 GN=EHI_164400 PE=3 SV=1	C4M1S2 (+2)	EHI_164400	17 kDa	0	0	0	0	0	0
La ribonucleoprotein, putative OS=Entamoeba histolytica HM-1:IMSS OX=294381 GN=EHI_131040 PE=4 SV=1	C4LXH2 (+2)	EHI_131040	28 kDa	0	0	0	0	0	0.37401
Uncharacterized protein OS=Entamoeba histolytica HM-1:IMSS OX=294381 GN=EHI_109870 PE=4 SV=1	C4M3K6 (+2)	EHI_109870	30 kDa	0	0	0	0	0	0.37401
GRIP domain-containing protein (Fragment) OS=Entamoeba histolytica HM-1:IMSS-A OX=885318 GN=EHI7A_126300 PE=4 SV=1	N9UX51	EHI7A_126300	83 kDa	0	0	0	0	0.91705	0
RNA-binding protein, putative OS=Entamoeba histolytica HM-1:IMSS OX=294381 GN=EHI_065870 PE=3 SV=1	C4M003 (+2)	EHI_065870	22 kDa	0	0	0	0.55132	0	0
Oxysterol binding protein, putative OS=Entamoeba histolytica HM-1:IMSS OX=294381 GN=EHI_050360 PE=3 SV=1	C4LTR1	EHI_050360	83 kDa	0	0	0	0	0	0
GTP-binding protein, putative OS=Entamoeba histolytica HM-1:IMSS OX=294381 GN=EHI_023210 PE=3 SV=1	C4LUN2 (+2)	EHI_023210	35 kDa	0	0	0	0	0	0.37401
Chaperonin-containing TCP-1, zeta subunit, putative OS=Entamoeba histolytica HM-1:IMSS OX=294381 GN=EHI_125800 PE=3 SV=1	C4LVW6	EHI_125800	60 kDa	0	0	0	0	0	0
Branchpoint-bridging protein OS=Entamoeba histolytica HM-1:IMSS OX=294381 GN=EHI_193510 PE=3 SV=1	C4M4V3 (+2)	EHI_193510	36 kDa	0	0	0	0	0	0
Transmembrane protein OS=Entamoeba histolytica HM-1:IMSS OX=294381 GN=EHI_030410 PE=4 SV=1	C4M454 (+2)	EHI_030410	40 kDa	0	0	0	1.1026	0	0.37401
DNA primase OS=Entamoeba histolytica HM-1:IMSS OX=294381 GN=EHI_103530 PE=3 SV=1	C4LVJ7 (+2)	EHI_103530	45 kDa	0	0	0	0	0	0.37401
Proteasome endopeptidase complex OS=Entamoeba histolytica HM-1:IMSS OX=294381 GN=EHI_011870 PE=4 SV=1	C4LTI2 (+2)	EHI_011870	28 kDa	0	0	0	0	0	0
ADP-ribosylation factor, putative OS=Entamoeba histolytica HM-1:IMSS OX=294381 GN=EHI_073480 PE=4 SV=1	A0A8U0WNX8 (+2)	EHI_073480	20 kDa	0	0	0	0	0	0
MIT domain-containing protein OS=Entamoeba histolytica HM-1:IMSS OX=294381 GN=EHI_124410 PE=4 SV=1	C4LZH7 (+2)	EHI_124410	29 kDa	0	0	0	0	0.45853	0
Nucleolar protein 10, putative OS=Entamoeba histolytica HM-1:IMSS OX=294381 GN=EHI_141370 PE=4 SV=1	C4LW22 (+2)	EHI_141370	48 kDa	0	0	0	0	0	0
Syntaxin, putative OS=Entamoeba histolytica HM-1:IMSS OX=294381 GN=EHI_164320 PE=4 SV=1	A0A8U0WPW9 (+1)	EHI_164320	32 kDa	0	0	0	0	0	0.37401
UDP-glucose:glycoprotein glucosyltransferase, putative OS=Entamoeba histolytica HM-1:IMSS OX=294381 GN=EHI_015280 PE=4 SV=1	C4M0W6 (+2)	EHI_015280	150 kDa	0	0	0	0	0.45853	0
Calcium-binding protein 1 (EhCBP1) OS=Entamoeba histolytica HM-1:IMSS OX=294381 GN=EHI_120900 PE=4 SV=1	C4M7Q6 (+2)	EHI_120900	15 kDa	0	0	0	0	0	0
Telo_bind domain-containing protein OS=Entamoeba histolytica HM-1:IMSS OX=294381 GN=EHI_179020 PE=4 SV=1	C4LUW5 (+2)	EHI_179020	55 kDa	0	0	0	0	0	0.37401
1,4-alpha-glucan branching enzyme OS=Entamoeba histolytica HM-1:IMSS OX=294381 GN=EHI_106090 PE=3 SV=1	C4M384 (+2)	EHI_106090	78 kDa	0	0	0	0	0	0
Mitochondrial outer membrane protein porin 2-like OS=Entamoeba histolytica HM-1:IMSS OX=294381 GN=EHI_178630 PE=4 SV=1	C4LUS8 (+2)	EHI_178630	32 kDa	0	0	0	0.55132	0	0
AAA domain-containing protein OS=Entamoeba histolytica HM-1:IMSS OX=294381 GN=EHI_128900 PE=4 SV=1	C4MBS4	EHI_128900	70 kDa	0	0	0	0	0	0
Uncharacterized protein OS=Entamoeba histolytica HM-1:IMSS OX=294381 GN=EHI_045460 PE=4 SV=1	B1N2H7	EHI_045460	13 kDa	0	0	0	0	0	0
Protein SEY1 homolog OS=Entamoeba histolytica HM-1:IMSS-B OX=885319 GN=EHI8A_163750 PE=3 SV=1	M3UKL9 (+1)	EHI8A_163750	97 kDa	0	0	0	0.55132	0	0
Transmembrane protein OS=Entamoeba histolytica HM-1:IMSS OX=294381 GN=EHI_142960 PE=4 SV=1	C4M6D2 (+2)	EHI_142960	61 kDa	0	0	0	0.55132	0	0
DDB1- and CUL4-associated factor 13 OS=Entamoeba histolytica HM-1:IMSS OX=294381 GN=EHI_135930 PE=3 SV=1	C4MBB9	EHI_135930	53 kDa	0	0	0	0	0	0
Uncharacterized protein OS=Entamoeba histolytica HM-1:IMSS OX=294381 GN=EHI_192260 PE=4 SV=1	B1N3B5 (+2)	EHI_192260	30 kDa	0	0	0	0	0	0
RNA-dependent RNA polymerase OS=Entamoeba histolytica HM-1:IMSS OX=294381 GN=EHI_179800 PE=3 SV=1	C4M631 (+2)	EHI_179800	96 kDa	0	0	0	0	0	0
Uncharacterized protein OS=Entamoeba histolytica HM-1:IMSS OX=294381 GN=EHI_078690 PE=4 SV=1	C4M4F1 (+2)	EHI_078690	41 kDa	0	0	0	0	0	0.74802
Signal peptide protein OS=Entamoeba histolytica HM-1:IMSS OX=294381 GN=EHI_189460 PE=4 SV=1	C4M4N0 (+2)	EHI_189460	20 kDa	0	0	0	0	0	0
Cell cycle control protein cwf2, putative OS=Entamoeba histolytica HM-1:IMSS OX=294381 GN=EHI_126150 PE=3 SV=1	C4LW00 (+2)	EHI_126150	42 kDa	0	0	0	0	0	0.37401
TATA-binding associated phosphoprotein OS=Entamoeba histolytica HM-1:IMSS OX=294381 GN=EHI_012250 PE=4 SV=1	C4LTL8 (+2)	EHI_012250	24 kDa	0	0	0	0	0.45853	0
Resolvase/invertase-type recombinase catalytic domain-containing protein OS=Entamoeba histolytica HM-1:IMSS OX=294381 GN=EHI_081120 PE=4 SV=1	C4M5A8	EHI_081120	10 kDa	0	0	0	0	0	0
Ras-1, putative OS=Entamoeba histolytica HM-1:IMSS OX=294381 GN=EHI_124520 PE=3 SV=1	B1N354 (+2)	EHI_124520	23 kDa	0	0	0	0	0	0
Heat shock protein 70, putative OS=Entamoeba histolytica HM-1:IMSS OX=294381 GN=EHI_133950 PE=3 SV=1	B1N3C9	EHI_133950	59 kDa	0	0	0	0	0.45853	0
Shell matrix protein OS=Entamoeba histolytica HM-1:IMSS OX=294381 GN=EHI_143070 PE=4 SV=1	C4MAJ0 (+2)	EHI_143070	35 kDa	0	0	0	0	0	0
Cleavage and polyadenylation specificity factor 73 kDa subunit, putative OS=Entamoeba histolytica HM-1:IMSS OX=294381 GN=EHI_136170 PE=4 SV=1	C4M297 (+2)	EHI_136170	87 kDa	0	0	0	0	0	0
Structural maintenance of chromosomes protein OS=Entamoeba histolytica HM-1:IMSS OX=294381 GN=EHI_164820 PE=3 SV=1	C4M1X5 (+1)	EHI_164820	142 kDa	0	0	0	0	0	0
DNA damage-binding protein 1 OS=Entamoeba histolytica HM-1:IMSS OX=294381 GN=EHI_031270 PE=3 SV=1	C4M4K9 (+2)	EHI_031270	112 kDa	0	0	0	0	0	0.37401
Protein SDA1 OS=Entamoeba histolytica HM-1:IMSS OX=294381 GN=EHI_009540 PE=3 SV=1	C4LZ30 (+2)	EHI_009540	84 kDa	0	0	0	0	0	0.37401
Methyltransferase, putative OS=Entamoeba histolytica HM-1:IMSS OX=294381 GN=EHI_029570 PE=3 SV=1	C4M7V8 (+2)	EHI_029570	31 kDa	0	0	0	0	0	0.37401
Zinc finger protein, putative OS=Entamoeba histolytica HM-1:IMSS OX=294381 GN=EHI_055640 PE=4 SV=1	C4M7A6 (+2)	EHI_055640	46 kDa	0	0	0	0	0	0
Threonine ammonia-lyase OS=Entamoeba histolytica HM-1:IMSS OX=294381 GN=EHI_092390 PE=3 SV=1	B1N2N4 (+1)	EHI_092390	45 kDa	0	0	3.0397	0	0	0
Nucleolar complex-associated protein 3-like protein OS=Entamoeba histolytica HM-1:IMSS OX=294381 GN=EHI_119610 PE=3 SV=1	C4M7Y4 (+2)	EHI_119610	68 kDa	0	0	0	0	0	0
DUF3883 domain-containing protein OS=Entamoeba histolytica HM-1:IMSS OX=294381 GN=EHI_023330 PE=4 SV=1	C4LUP4 (+2)	EHI_023330	123 kDa	0	0	0	0	0	0
Rho-GAP domain-containing protein OS=Entamoeba histolytica HM-1:IMSS OX=294381 GN=EHI_136460 PE=4 SV=1	C4M2B5 (+2)	EHI_136460	87 kDa	0	0	0	0	0	0.37401
GATA zinc finger domain-containing protein 14-like OS=Entamoeba histolytica HM-1:IMSS OX=294381 GN=EHI_005940 PE=4 SV=1	C4M2M9 (+2)	EHI_005940	26 kDa	0	0	0	0	0	0.37401
Serine carboxypeptidase (S28) family protein OS=Entamoeba histolytica HM-1:IMSS OX=294381 GN=EHI_037190 PE=3 SV=1	C4M7N4	EHI_037190	54 kDa	0	0	0	0.55132	0	0
Proline--tRNA ligase OS=Entamoeba histolytica HM-1:IMSS OX=294381 GN=EHI_040400 PE=3 SV=1	C4M2G9 (+2)	EHI_040400	61 kDa	0	0	0	0	0	0
Uncharacterized protein OS=Entamoeba histolytica HM-1:IMSS OX=294381 GN=EHI_134650 PE=4 SV=1	C4M014 (+2)	EHI_134650	44 kDa	0	0	0	0	0	0
Translocon-associated protein subunit alpha OS=Entamoeba histolytica HM-1:IMSS OX=294381 GN=EHI_083600 PE=4 SV=1	C4M944 (+2)	EHI_083600	24 kDa	0	0	0	0	0	0.37401
Proteasome subunit alpha type OS=Entamoeba histolytica HM-1:IMSS OX=294381 GN=EHI_153190 PE=3 SV=1	C4LSB1 (+2)	EHI_153190	27 kDa	0	0	0	0	0	0
Exosome component 10, putative OS=Entamoeba histolytica HM-1:IMSS OX=294381 GN=EHI_021400 PE=4 SV=1	C4M054 (+2)	EHI_021400	61 kDa	0	0	0	0	0	0
Helicase, putative OS=Entamoeba histolytica HM-1:IMSS OX=294381 GN=EHI_090040 PE=3 SV=1	C4MA27 (+2)	EHI_090040	140 kDa	0	0	0	0	0	0.37401
U3 small nucleolar ribonucleoprotein subunit, putative OS=Entamoeba histolytica HM-1:IMSS OX=294381 GN=EHI_035170 PE=3 SV=1	B1N507 (+1)	EHI_035170	22 kDa	0	0	0	0	0	0
Uncharacterized protein OS=Entamoeba histolytica HM-1:IMSS OX=294381 GN=EHI_164070 PE=4 SV=1	C4MBP0 (+1)	EHI_164070	29 kDa	0	0	0	0	0	0
ATPase, AAA family protein OS=Entamoeba histolytica HM-1:IMSS OX=294381 GN=EHI_141040 PE=4 SV=1	C4M511 (+2)	EHI_141040	104 kDa	0	0	0	0	0	0
Serine/threonine-protein kinase 3, putative OS=Entamoeba histolytica HM-1:IMSS OX=294381 GN=EHI_156670 PE=3 SV=1	C4MB14 (+2)	EHI_156670	40 kDa	0	0	0	0.55132	0.45853	0
Uncharacterized protein OS=Entamoeba histolytica HM-1:IMSS OX=294381 GN=EHI_199170 PE=4 SV=1	C4LWW2 (+1)	EHI_199170	35 kDa	0	0	0	0	0	0
Rap-GAP domain-containing protein OS=Entamoeba histolytica HM-1:IMSS OX=294381 GN=EHI_138990 PE=4 SV=1	B1N3Q0 (+1)	EHI_138990	160 kDa	0	0	0	0.55132	0	0
DSBA domain-containing protein OS=Entamoeba histolytica HM-1:IMSS OX=294381 GN=EHI_002140 PE=4 SV=1	C4M817 (+2)	EHI_002140	24 kDa	0	0	0	0	0	0.37401
Coiled-coil domain-containing protein 186 OS=Entamoeba histolytica HM-1:IMSS OX=294381 GN=EHI_065370 PE=4 SV=1	C4M6L4 (+1)	EHI_065370	37 kDa	0	0	0	0	0	0.37401
Actin, putative OS=Entamoeba histolytica HM-1:IMSS OX=294381 GN=EHI_039070 PE=3 SV=1	C4LZS8 (+2)	EHI_039070	40 kDa	0	0	0	0	0	0
Cleavage stimulation factor, putative OS=Entamoeba histolytica HM-1:IMSS OX=294381 GN=EHI_098370 PE=4 SV=1	B1N2W3 (+1)	EHI_098370	65 kDa	0	0	0	0	0	0.37401
Glutamic acid-rich protein OS=Entamoeba histolytica HM-1:IMSS OX=294381 GN=EHI_062670 PE=4 SV=1	C4M1P3 (+2)	EHI_062670	83 kDa	0	0	0	0	0	0.37401
Uncharacterized protein OS=Entamoeba histolytica HM-1:IMSS OX=294381 GN=EHI_029930 PE=4 SV=1	B1N5K4	EHI_029930	16 kDa	0	0	0	0.55132	0	0
Heat shock protein 70, putative OS=Entamoeba histolytica HM-1:IMSS OX=294381 GN=EHI_148990 PE=4 SV=1	C4LT65	EHI_148990	88 kDa	0	0	0	0.55132	0	0
Leucine-rich repeat containing protein OS=Entamoeba histolytica HM-1:IMSS OX=294381 GN=EHI_073580 PE=3 SV=1	C4LXL8 (+1)	EHI_073580	56 kDa	0	0	0	0.55132	0	0
DUF4832 domain-containing protein OS=Entamoeba histolytica HM-1:IMSS OX=294381 GN=EHI_119270 PE=4 SV=1	C4M4X6 (+2)	EHI_119270	52 kDa	0	0	0	0	0	0.37401
Uncharacterized protein OS=Entamoeba histolytica HM-1:IMSS OX=294381 GN=EHI_035820 PE=4 SV=1	C4LY09 (+2)	EHI_035820	82 kDa	0	0	0	0.55132	0	0
Purine nucleoside phosphorylase, putative OS=Entamoeba histolytica HM-1:IMSS OX=294381 GN=EHI_048740 PE=4 SV=1	C4M2Y7 (+2)	EHI_048740	35 kDa	0	0	0	0.55132	0	0
OmpH family outer membrane protein OS=Entamoeba histolytica HM-1:IMSS OX=294381 GN=EHI_152800 PE=4 SV=1	C4LSW3 (+2)	EHI_152800	10 kDa	0	0	0	0	0.45853	0
Thioredoxin domain-containing protein OS=Entamoeba histolytica HM-1:IMSS OX=294381 GN=EHI_072060 PE=4 SV=1	C4M611 (+2)	EHI_072060	58 kDa	0	0	0	0.55132	0	0
Pumilio family RNA-binding protein OS=Entamoeba histolytica HM-1:IMSS OX=294381 GN=EHI_026330 PE=4 SV=1	C4M5U9	EHI_026330	62 kDa	0	0	0	0	0	0
Vesicle-associated membrane protein, putative OS=Entamoeba histolytica HM-1:IMSS OX=294381 GN=EHI_069370 PE=4 SV=1	A0A8U0WP07	EHI_069370	15 kDa	0	0	0	0	0	0.37401
Serine/threonine-protein kinase TOR OS=Entamoeba histolytica HM-1:IMSS OX=294381 GN=EHI_169320 PE=3 SV=1	C4M249 (+2)	EHI_169320	270 kDa	0	0	0	0	0	0
Thioredoxin, putative OS=Entamoeba histolytica HM-1:IMSS OX=294381 GN=EHI_169240 PE=4 SV=1	C4M242 (+2)	EHI_169240	20 kDa	0	0	0	0.55132	0	0
F_actin_bund_C domain-containing protein OS=Entamoeba histolytica HM-1:IMSS OX=294381 GN=EHI_010570 PE=4 SV=1	C4LYU4 (+2)	EHI_010570	33 kDa	0	0	0	0.55132	0	0
Rab family GTPase OS=Entamoeba histolytica HM-1:IMSS OX=294381 GN=EHI_053420 PE=4 SV=1	A0A8U0WNW9 (+2)	EHI_053420	24 kDa	0	0	0	0	0	0
Small nuclear ribonucleoprotein Sm D2 OS=Entamoeba histolytica HM-1:IMSS OX=294381 GN=EHI_108640 PE=3 SV=1	C4M843 (+2)	EHI_108640	12 kDa	0	0	0	0	0	0.37401
WD domain containing protein OS=Entamoeba histolytica HM-1:IMSS OX=294381 GN=EHI_178860 PE=4 SV=1	C4LUV0 (+2)	EHI_178860	48 kDa	0	0	0	0	0	0.37401
LIM zinc finger domain containing protein OS=Entamoeba histolytica HM-1:IMSS OX=294381 GN=EHI_004170 PE=4 SV=1	C4LYP1 (+2)	EHI_004170	19 kDa	0	0	0	0	0.45853	0
Eukaryotic translation initiation factor eIF-5 OS=Entamoeba histolytica HM-1:IMSS OX=294381 GN=EHI_129770 PE=3 SV=1	C4M5Q8 (+2)	EHI_129770	41 kDa	0	0	0	0	0	0
Polyadenylate-binding protein, putative OS=Entamoeba histolytica HM-1:IMSS OX=294381 GN=EHI_198750 PE=3 SV=1	C4LWS1 (+2)	EHI_198750	60 kDa	0	0	0	0.55132	0	0
DH domain-containing protein OS=Entamoeba histolytica HM-1:IMSS OX=294381 GN=EHI_155540 PE=4 SV=1	C4LWA5 (+2)	EHI_155540	64 kDa	0	0	0	0	0	0.37401
SSD domain-containing protein OS=Entamoeba histolytica HM-1:IMSS OX=294381 GN=EHI_083110 PE=4 SV=1	C4M755 (+2)	EHI_083110	61 kDa	0	0	0	0	0	0.37401
Vacuolar protein sorting-associated protein OS=Entamoeba histolytica HM-1:IMSS OX=294381 GN=EHI_012580 PE=3 SV=1	C4LTP4 (+2)	EHI_012580	330 kDa	0	0	0	0	0	0.37401
Rap/Ran GTPase-activating protein, putative OS=Entamoeba histolytica HM-1:IMSS OX=294381 GN=EHI_155710 PE=4 SV=1	C4LWC0 (+2)	EHI_155710	154 kDa	0	0	0	0	0	0
DNA-directed DNA polymerase OS=Entamoeba histolytica HM-1:IMSS OX=294381 GN=EHI_164190 PE=3 SV=1	B1N3D4	EHI_164190	150 kDa	0	0	0	1.1026	0	0
Tetraspanin family protein OS=Entamoeba histolytica HM-1:IMSS OX=294381 GN=EHI_006930 PE=4 SV=1	C4M0G6 (+2)	EHI_006930	24 kDa	0	0	0	0	0	0
UBX domain-containing protein OS=Entamoeba histolytica HM-1:IMSS OX=294381 GN=EHI_114380 PE=4 SV=1	C4M8M1 (+2)	EHI_114380	48 kDa	0	0	0	0	0	0
Uncharacterized protein OS=Entamoeba histolytica HM-1:IMSS OX=294381 GN=EHI_013920 PE=4 SV=1	C4LXN4 (+2)	EHI_013920	12 kDa	0	0	0	0	0	0.37401
RRM domain-containing protein OS=Entamoeba histolytica HM-1:IMSS OX=294381 GN=EHI_017030 PE=4 SV=1	C4MAK5 (+2)	EHI_017030	26 kDa	0	0	0	0	0	0
Uncharacterized protein OS=Entamoeba histolytica HM-1:IMSS OX=294381 GN=EHI_026470 PE=4 SV=1	C4M5W7 (+2)	EHI_026470	43 kDa	0	0	0	0	0	0
Separase OS=Entamoeba histolytica HM-1:IMSS OX=294381 GN=EHI_120330 PE=4 SV=1	C4M8H8 (+1)	EHI_120330	172 kDa	0	0	0	0	0	0.37401
S phingosine-1-phosphate lyase 1, putative OS=Entamoeba histolytica HM-1:IMSS OX=294381 GN=EHI_039350 PE=3 SV=1	C4M8C7 (+2)	EHI_039350	58 kDa	0	0	0	0.55132	0	0
Longin-type vesicle-associated membrane protein, putative OS=Entamoeba histolytica HM-1:IMSS OX=294381 GN=EHI_022910 PE=4 SV=1	A0A8U0WPV6 (+1)	EHI_022910	26 kDa	0	0	0	0	0.45853	0
RRM domain-containing protein OS=Entamoeba histolytica HM-1:IMSS OX=294381 GN=EHI_044920 PE=4 SV=1	C4LTB1 (+2)	EHI_044920	37 kDa	0	0	0	0	0	0

## Sheet: Trial 3
Table S3. E. histolytica HA-KERP2 co-IP proteome
Trial 3
Identified Proteins (1080)	Accession Number	Alternate ID	Molecular Weight	HAKERP2-cytosol (3A)	HAKERP2∆185−239-cytosol (3B)	HAmock-cytosol (3C)	HAKERP2-nucleus (3D)	HAKERP2∆185−239-nucleus (3E)	HAmock-nucleus (3F)
Myosin heavy chain OS=Entamoeba histolytica HM-1:IMSS OX=294381 GN=EHI_110180 PE=3 SV=1	C4LU72 (+2)	EHI_110180	247 kDa	42.624	50.1	36.962	22.97	18.927	14.993
Actin OS=Entamoeba histolytica HM-1:IMSS OX=294381 GN=EHI_107290 PE=3 SV=1	B1N2P0	EHI_107290	42 kDa	27.58	64.415	59.139	5.7425	9.2623	9.1418
Nuclear pore protein, putative OS=Entamoeba histolytica HM-1:IMSS OX=294381 GN=EHI_183510 PE=3 SV=1	C4M730 (+2)	EHI_183510	186 kDa	2.5073	0	0	17.802	11.276	10.604
Interaptin, putative OS=Entamoeba histolytica HM-1:IMSS OX=294381 GN=EHI_148910 PE=4 SV=1	C4LT58 (+2)	EHI_148910	135 kDa	0	0	0	11.485	11.276	12.433
Myosin heavy chain OS=Entamoeba histolytica HM-1:IMSS OX=294381 GN=EHI_140720 PE=4 SV=1	C4M3P4 (+2)	EHI_140720	152 kDa	0	0	0	7.4652	6.4433	7.6791
Aldehyde-alcohol dehydrogenase OS=Entamoeba histolytica HM-1:IMSS OX=294381 GN=EHI_150490 PE=3 SV=1	C4M230 (+1)	EHI_150490	96 kDa	5.0146	21.472	11.089	5.7425	4.0271	2.5597
Axoneme-associated protein mst101 OS=Entamoeba histolytica HM-1:IMSS OX=294381 GN=EHI_160980 PE=4 SV=1	C4M2R6 (+2)	EHI_160980	34 kDa	12.536	14.314	22.177	6.891	6.0406	3.291
Pyruvate phosphate dikinase OS=Entamoeba histolytica HM-1:IMSS OX=294381 GN=EHI_009530 PE=4 SV=1	A0A8U0WP38 (+2)	EHI_009530	98 kDa	25.073	21.472	18.481	7.4652	3.2217	4.3881
DUF4200 domain-containing protein OS=Entamoeba histolytica HM-1:IMSS OX=294381 GN=EHI_008020 PE=4 SV=1	C4LYD8 (+2)	EHI_008020	99 kDa	5.0146	0	0	6.3167	10.068	7.6791
Galactose-specific adhesin 170kD subunit OS=Entamoeba histolytica HM-1:IMSS OX=294381 GN=EHI_077500 PE=4 SV=1	C4M8N3	EHI_077500	145 kDa	0	0	3.6962	6.3167	5.6379	7.6791
Peroxiredoxin, putative OS=Entamoeba histolytica HM-1:IMSS OX=294381 GN=EHI_122310 PE=3 SV=1	C4MBP3	EHI_122310	27 kDa	15.044	21.472	14.785	3.4455	1.6108	2.5597
Clathrin heavy chain OS=Entamoeba histolytica HM-1:IMSS-B OX=885319 GN=EHI8A_063050 PE=3 SV=1	M3TXX7 (+1)	EHI8A_063050	193 kDa	5.0146	3.5786	3.6962	6.891	3.6244	4.7537
Serine-threonine rich protein OS=Entamoeba histolytica HM-1:IMSS OX=294381 GN=EHI_095870 PE=4 SV=1	C4M3E4 (+2)	EHI_095870	104 kDa	2.5073	0	0	9.1879	9.2623	8.0448
Adenylyl cyclase-associated protein OS=Entamoeba histolytica HM-1:IMSS OX=294381 GN=EHI_136150 PE=3 SV=1	C4M295	EHI_136150	53 kDa	5.0146	3.5786	3.6962	2.8712	2.8189	4.0224
Heat shock protein 70, putative OS=Entamoeba histolytica HM-1:IMSS OX=294381 GN=EHI_052860 PE=3 SV=1	C4M3S5	EHI_052860	72 kDa	7.5219	17.893	18.481	3.4455	2.4162	2.5597
Gal/GalNAc lectin heavy subunit OS=Entamoeba histolytica HM-1:IMSS OX=294381 GN=EHI_012270 PE=4 SV=1	C4LTM0	EHI_012270	144 kDa	0	0	0	3.4455	3.6244	5.8508
Elongation factor 1-alpha OS=Entamoeba histolytica HM-1:IMSS OX=294381 GN=EHI_052400 PE=2 SV=1	C4MAC9	EHI_052400	48 kDa	0	0	0	0	0	0
Elongation factor 1-alpha OS=Entamoeba histolytica HM-1:IMSS OX=294381 GN=EHI_011210 PE=3 SV=1	C4M7D4	EHI_011210	48 kDa	12.536	17.893	33.266	2.8712	1.2081	0.36567
Protein serine/threonine kinase OS=Entamoeba histolytica HM-1:IMSS OX=294381 GN=EHI_098510 PE=4 SV=1	C4LXD1	EHI_098510	188 kDa	5.0146	0	0	2.297	2.4162	4.3881
GRIP domain-containing protein OS=Entamoeba histolytica HM-1:IMSS OX=294381 GN=EHI_152940 PE=4 SV=1	C4LS87 (+2)	EHI_152940	124 kDa	0	0	0	6.891	7.6514	6.9478
Serine-threonine-isoleucine rich protein, putative OS=Entamoeba histolytica HM-1:IMSS OX=294381 GN=EHI_012330 PE=4 SV=1	C4LTM6	EHI_012330	291 kDa	0	0	0	2.8712	2.8189	4.3881
Epsin-2 OS=Entamoeba histolytica HM-1:IMSS OX=294381 GN=EHI_145610 PE=4 SV=1	B1N3Z3	EHI_145610	80 kDa	0	0	0	8.6137	7.2487	7.3134
Serine-threonine-isoleucine rich protein, putative OS=Entamoeba histolytica HM-1:IMSS OX=294381 GN=EHI_025700 PE=4 SV=1	C4MAX8	EHI_025700	288 kDa	0	0	0	2.8712	3.2217	4.3881
Galactose-specific adhesin 170kD subunit, putative OS=Entamoeba histolytica HM-1:IMSS OX=294381 GN=EHI_042370 PE=4 SV=1	B1N559	EHI_042370	143 kDa	0	0	0	0	5.6379	0
Glutamic acid-rich protein, putative OS=Entamoeba histolytica HM-1:IMSS OX=294381 GN=EHI_082590 PE=4 SV=1	C4M6A8	EHI_082590	121 kDa	0	0	0	6.3167	5.6379	6.2164
Uncharacterized protein OS=Entamoeba histolytica HM-1:IMSS OX=294381 GN=EHI_145970 PE=4 SV=1	C4M3Q2	EHI_145970	166 kDa	0	0	0	6.891	7.2487	8.4105
70 kDa heat shock protein, putative OS=Entamoeba histolytica HM-1:IMSS OX=294381 GN=EHI_199590 PE=3 SV=1	C4M770 (+2)	EHI_199590	73 kDa	7.5219	14.314	3.6962	9.1879	5.2352	1.8284
Galactose-inhibitable lectin 35 kDa subunit OS=Entamoeba histolytica HM-1:IMSS OX=294381 GN=EHI_035690 PE=4 SV=1	C4LXZ9 (+1)	EHI_035690	34 kDa	0	0	0	5.7425	4.8325	5.4851
Gal/GalNAc lectin light subunit OS=Entamoeba histolytica HM-1:IMSS OX=294381 GN=EHI_148790 PE=4 SV=1	C4LT47 (+2)	EHI_148790	32 kDa	5.0146	0	0	4.594	5.2352	5.8508
Galactose-specific adhesin light subunit, putative OS=Entamoeba histolytica HM-1:IMSS OX=294381 GN=EHI_049690 PE=4 SV=1	B1N2L3 (+1)	EHI_049690	34 kDa	0	0	0	2.8712	4.0271	4.7537
DNA topoisomerase II, putative OS=Entamoeba histolytica HM-1:IMSS OX=294381 GN=EHI_120640 PE=4 SV=1	A0A8U0WPS2 (+2)	EHI_120640	155 kDa	2.5073	0	0	1.7227	3.2217	4.0224
PIWI, putative OS=Entamoeba histolytica HM-1:IMSS OX=294381 GN=EHI_125650 PE=3 SV=1	C4LVV2 (+1)	EHI_125650	110 kDa	12.536	21.472	29.57	2.297	1.6108	2.194
Pyruvate:ferredoxin oxidoreductase OS=Entamoeba histolytica HM-1:IMSS OX=294381 GN=EHI_051060 PE=4 SV=1	C4LTX6 (+1)	EHI_051060	128 kDa	15.044	17.893	11.089	2.297	1.2081	1.4627
Unconventional myosin IB OS=Entamoeba histolytica HM-1:IMSS OX=294381 GN=EHI_110810 PE=1 SV=1	C4LUC7 (+2)	EHI_110810	119 kDa	12.536	7.1572	11.089	2.8712	3.2217	2.5597
TNase-like domain-containing protein OS=Entamoeba histolytica HM-1:IMSS OX=294381 GN=EHI_005150 PE=4 SV=1	C4M0A8 (+2)	EHI_005150	99 kDa	2.5073	3.5786	3.6962	2.8712	1.6108	1.8284
EF-hand calcium-binding domain containing protein OS=Entamoeba histolytica HM-1:IMSS OX=294381 GN=EHI_060740 PE=1 SV=1	C4MBE2 (+2)	EHI_060740	27 kDa	10.029	3.5786	14.785	1.7227	4.4298	4.0224
Uncharacterized protein OS=Entamoeba histolytica HM-1:IMSS OX=294381 GN=EHI_169970 PE=4 SV=1	C4M1B9 (+2)	EHI_169970	43 kDa	0	0	0	8.6137	4.0271	4.0224
40S ribosomal protein S2, putative OS=Entamoeba histolytica HM-1:IMSS OX=294381 GN=EHI_020280 PE=3 SV=1	C4M7U0 (+2)	EHI_020280	28 kDa	2.5073	7.1572	14.785	3.4455	2.0135	1.4627
GRIP domain-containing protein OS=Entamoeba histolytica HM-1:IMSS OX=294381 GN=EHI_131060 PE=4 SV=1	C4LXH4 (+2)	EHI_131060	64 kDa	5.0146	0	0	7.4652	6.0406	6.5821
Serine-threonine-isoleucine rich protein, putative OS=Entamoeba histolytica HM-1:IMSS OX=294381 GN=EHI_004340 PE=4 SV=1	B1N330	EHI_004340	260 kDa	0	0	0	1.7227	1.6108	5.1194
Glyceraldehyde-3-phosphate dehydrogenase OS=Entamoeba histolytica HM-1:IMSS OX=294381 GN=EHI_008200 PE=3 SV=1	C4LVR9	EHI_008200	36 kDa	5.0146	14.314	11.089	0.57425	3.2217	1.4627
Uncharacterized protein OS=Entamoeba histolytica HM-1:IMSS OX=294381 GN=EHI_177420 PE=4 SV=1	C4LY45	EHI_177420	53 kDa	0	0	0	7.4652	6.4433	5.8508
Actin-like protein, putative OS=Entamoeba histolytica HM-1:IMSS OX=294381 GN=EHI_111050 PE=3 SV=1	C4M5I6 (+2)	EHI_111050	45 kDa	10.029	3.5786	0	3.4455	2.8189	1.8284
Galactose-inhibitable lectin, putative OS=Entamoeba histolytica HM-1:IMSS OX=294381 GN=EHI_058330 PE=4 SV=1	C4M5G9 (+2)	EHI_058330	32 kDa	0	0	0	0	5.2352	4.7537
RanBD1 domain-containing protein OS=Entamoeba histolytica HM-1:IMSS OX=294381 GN=EHI_085060 PE=4 SV=1	C4M1L6 (+2)	EHI_085060	77 kDa	17.551	0	0	5.7425	7.2487	4.7537
NAD(P) transhydrogenase subunit alpha, putative OS=Entamoeba histolytica HM-1:IMSS OX=294381 GN=EHI_014030 PE=4 SV=1	A0A8U0WPM4	EHI_014030	118 kDa	0	3.5786	0	2.297	4.4298	2.9254
Dot/Icm system substrate protein LidA OS=Entamoeba histolytica HM-1:IMSS OX=294381 GN=EHI_083620 PE=4 SV=1	C4M946 (+2)	EHI_083620	185 kDa	2.5073	0	0	1.7227	2.4162	1.097
60S ribosomal protein L7a OS=Entamoeba histolytica HM-1:IMSS OX=294381 GN=EHI_029530 PE=3 SV=1	B1N3R9 (+1)	EHI_029530	32 kDa	5.0146	10.736	11.089	2.8712	2.0135	2.194
DNA double-strand break repair Rad50 ATPase OS=Entamoeba histolytica HM-1:IMSS OX=294381 GN=EHI_022130 PE=4 SV=1	C4MAT9 (+2)	EHI_022130	71 kDa	5.0146	0	0	1.7227	2.0135	1.8284
G protein alpha subunit, putative OS=Entamoeba histolytica HM-1:IMSS OX=294381 GN=EHI_140350 PE=1 SV=1	C4M483 (+2)	EHI_140350	40 kDa	2.5073	0	0	2.8712	3.2217	4.3881
Leucine rich repeats family protein OS=Entamoeba histolytica HM-1:IMSS OX=294381 GN=EHI_140310 PE=4 SV=1	C4M479 (+2)	EHI_140310	76 kDa	10.029	0	0	3.4455	3.2217	3.291
40S ribosomal protein SA OS=Entamoeba histolytica HM-1:IMSS OX=294381 GN=EHI_081410 PE=3 SV=1	C4M5A0 (+2)	EHI_081410	29 kDa	12.536	14.314	33.266	1.7227	1.2081	1.4627
CNH domain-containing protein OS=Entamoeba histolytica HM-1:IMSS OX=294381 GN=EHI_035980 PE=4 SV=1	C4M7F7 (+2)	EHI_035980	103 kDa	2.5073	0	0	4.0197	4.8325	4.3881
Grainin 1 OS=Entamoeba histolytica HM-1:IMSS OX=294381 GN=EHI_167300 PE=4 SV=1	C4MAF9 (+2)	EHI_167300	24 kDa	10.029	7.1572	3.6962	1.7227	1.2081	1.4627
Actin-related protein 2/3 complex subunit OS=Entamoeba histolytica HM-1:IMSS OX=294381 GN=EHI_045000 PE=3 SV=1	C4LTB5 (+1)	EHI_045000	40 kDa	0	0	3.6962	4.0197	2.8189	2.194
Saposin B-type domain-containing protein OS=Entamoeba histolytica HM-1:IMSS OX=294381 GN=EHI_096370 PE=4 SV=1	C4LWF0 (+2)	EHI_096370	115 kDa	0	0	0	3.4455	2.4162	2.5597
Grainin 2 OS=Entamoeba histolytica HM-1:IMSS OX=294381 GN=EHI_167310 PE=4 SV=1	A0A8U0WPU5 (+2)	EHI_167310	24 kDa	2.5073	3.5786	7.3924	3.4455	2.4162	2.194
40S ribosomal protein S6 OS=Entamoeba histolytica HM-1:IMSS OX=294381 GN=EHI_013890 PE=3 SV=1	C4LXN2	EHI_013890	30 kDa	7.5219	0	7.3924	2.297	2.8189	2.194
60S ribosomal protein L4, putative OS=Entamoeba histolytica HM-1:IMSS OX=294381 GN=EHI_000510 PE=3 SV=1	C4LZA2	EHI_000510	47 kDa	2.5073	10.736	7.3924	0.57425	0.80541	2.194
4-alpha-glucanotransferase OS=Entamoeba histolytica HM-1:IMSS OX=294381 GN=EHI_148560 PE=3 SV=1	C4LT26 (+2)	EHI_148560	103 kDa	0	0	0	4.594	3.2217	3.6567
40S ribosomal protein S3a OS=Entamoeba histolytica HM-1:IMSS OX=294381 GN=EHI_065270 PE=3 SV=1	C4M609	EHI_065270	29 kDa	2.5073	0	7.3924	2.8712	2.8189	2.194
DNA double-strand break repair Rad50 ATPase OS=Entamoeba histolytica HM-1:IMSS OX=294381 GN=EHI_194550 PE=4 SV=1	C4LZW6	EHI_194550	40 kDa	2.5073	0	0	1.7227	2.4162	2.194
Actinin-like protein, putative OS=Entamoeba histolytica HM-1:IMSS OX=294381 GN=EHI_164430 PE=4 SV=1	C4M1S5 (+1)	EHI_164430	54 kDa	2.5073	0	11.089	2.8712	1.6108	1.097
Nucleolar protein Nop56, putative OS=Entamoeba histolytica HM-1:IMSS OX=294381 GN=EHI_122740 PE=3 SV=1	C4M5N2 (+2)	EHI_122740	52 kDa	2.5073	0	0	3.4455	5.6379	5.4851
Phosphopyruvate hydratase OS=Entamoeba histolytica HM-1:IMSS OX=294381 GN=EHI_130700 PE=3 SV=1	C4LXE8 (+2)	EHI_130700	47 kDa	10.029	17.893	7.3924	4.0197	4.0271	0.36567
Helicase C-terminal domain-containing protein OS=Entamoeba histolytica HM-1:IMSS OX=294381 GN=EHI_031370 PE=4 SV=1	C4M4L4 (+2)	EHI_031370	118 kDa	0	0	0	1.7227	3.2217	3.291
60S ribosomal protein L3, putative OS=Entamoeba histolytica HM-1:IMSS OX=294381 GN=EHI_005890 PE=3 SV=1	C4LW09	EHI_005890	46 kDa	2.5073	3.5786	11.089	1.1485	1.2081	1.097
Uncharacterized protein OS=Entamoeba histolytica HM-1:IMSS OX=294381 GN=EHI_146110 PE=4 SV=1	C4M3Q5 (+2)	EHI_146110	43 kDa	2.5073	0	0	5.7425	2.8189	3.291
40S ribosomal protein S7 OS=Entamoeba histolytica HM-1:IMSS OX=294381 GN=EHI_067530 PE=3 SV=1	C4M9F9 (+2)	EHI_067530	22 kDa	2.5073	7.1572	3.6962	1.7227	1.2081	0.73134
Heat shock protein 70, putative OS=Entamoeba histolytica HM-1:IMSS OX=294381 GN=EHI_188610 PE=3 SV=1	B1N486 (+1)	EHI_188610	71 kDa	0	0	0	0	0	0
DNA double-strand break repair Rad50 ATPase OS=Entamoeba histolytica HM-1:IMSS OX=294381 GN=EHI_188170 PE=4 SV=1	C4M191	EHI_188170	36 kDa	0	0	0	2.297	2.4162	1.4627
40S ribosomal protein S8 OS=Entamoeba histolytica HM-1:IMSS OX=294381 GN=EHI_009870 PE=3 SV=1	C4M0Q2	EHI_009870	27 kDa	7.5219	3.5786	0	1.1485	3.6244	2.194
Fructose-1,6-bisphosphate aldolase, putative OS=Entamoeba histolytica HM-1:IMSS OX=294381 GN=EHI_098570 PE=4 SV=1	C4LXD7	EHI_098570	36 kDa	7.5219	7.1572	3.6962	1.1485	0.80541	1.097
DNA-directed RNA polymerase subunit OS=Entamoeba histolytica HM-1:IMSS-B OX=885319 GN=EHI8A_079580 PE=3 SV=1	M3TGJ8	EHI8A_079580	178 kDa	0	0	0	0.57425	3.2217	3.291
BRCT domain-containing protein OS=Entamoeba histolytica HM-1:IMSS OX=294381 GN=EHI_004350 PE=4 SV=1	C4LYP8 (+2)	EHI_004350	63 kDa	0	0	0	5.1682	2.4162	2.5597
E3 ubiquitin protein ligase OS=Entamoeba histolytica HM-1:IMSS OX=294381 GN=EHI_059690 PE=4 SV=1	C4M339 (+2)	EHI_059690	106 kDa	0	0	0	2.8712	5.2352	4.7537
Nuclease OS=Entamoeba histolytica HM-1:IMSS OX=294381 GN=EHI_101240 PE=4 SV=1	C4M8B5 (+2)	EHI_101240	96 kDa	5.0146	0	0	3.4455	2.0135	1.097
40S ribosomal protein S3a OS=Entamoeba histolytica HM-1:IMSS OX=294381 GN=EHI_050280 PE=3 SV=1	C4LTQ5	EHI_050280	29 kDa	0	0	0	0	0	2.194
14-3-3 protein 2 OS=Entamoeba histolytica HM-1:IMSS OX=294381 GN=EHI_098280 PE=3 SV=1	C4LXB1 (+2)	EHI_098280	28 kDa	5.0146	7.1572	0	1.7227	0.80541	0.36567
V-type ATPase, B subunit, putative OS=Entamoeba histolytica HM-1:IMSS OX=294381 GN=EHI_189850 PE=3 SV=1	A0A8U0WP39 (+2)	EHI_189850	55 kDa	0	0	0	3.4455	2.8189	1.097
Acetyl-CoA synthetase, putative OS=Entamoeba histolytica HM-1:IMSS OX=294381 GN=EHI_178960 PE=4 SV=1	C4LUV9 (+2)	EHI_178960	77 kDa	12.536	7.1572	3.6962	1.1485	0.80541	0
Calmodulin, putative OS=Entamoeba histolytica HM-1:IMSS OX=294381 GN=EHI_023500 PE=4 SV=1	C4LUQ9 (+2)	EHI_023500	17 kDa	0	7.1572	7.3924	2.8712	1.2081	1.4627
40S ribosomal protein S4, putative OS=Entamoeba histolytica HM-1:IMSS OX=294381 GN=EHI_118170 PE=3 SV=1	B1N336 (+1)	EHI_118170	36 kDa	5.0146	0	3.6962	1.7227	2.0135	1.8284
60S ribosomal protein L9, putative OS=Entamoeba histolytica HM-1:IMSS OX=294381 GN=EHI_126140 PE=3 SV=1	C4LVZ9	EHI_126140	22 kDa	5.0146	10.736	3.6962	1.7227	1.2081	1.097
BRO1 domain-containing protein OS=Entamoeba histolytica HM-1:IMSS OX=294381 GN=EHI_167710 PE=4 SV=1	C4M7Z2 (+2)	EHI_167710	104 kDa	0	0	0	2.8712	1.6108	1.4627
Villidin, putative OS=Entamoeba histolytica HM-1:IMSS OX=294381 GN=EHI_021270 PE=4 SV=1	C4M042 (+2)	EHI_021270	170 kDa	0	0	0	1.1485	2.0135	2.194
60S ribosomal protein L27 OS=Entamoeba histolytica HM-1:IMSS OX=294381 GN=EHI_183480 PE=3 SV=1	C4M727 (+2)	EHI_183480	16 kDa	5.0146	3.5786	3.6962	1.1485	1.6108	1.097
KERP2-1-164 Truncated DEK_C domain-containing protein OS=Entamoeba histolytica HM-1:IMSS OX=294381 GN=EHI_065630 PE=4 SV=1	1C4LZX9 (+3)	EHI_065630	21 kDa	12.536	39.365	0	2.297	1.2081	1.4627
Nucleosome assembly protein, putative OS=Entamoeba histolytica HM-1:IMSS OX=294381 GN=EHI_072030 PE=3 SV=1	C4M608 (+2)	EHI_072030	28 kDa	7.5219	21.472	14.785	0	0	0
60S ribosomal protein L5, putative OS=Entamoeba histolytica HM-1:IMSS OX=294381 GN=EHI_006860 PE=3 SV=1	C4LU56	EHI_006860	32 kDa	10.029	17.893	14.785	2.8712	3.2217	2.194
Plastin-2, putative OS=Entamoeba histolytica HM-1:IMSS-B OX=885319 GN=EHI8A_186020 PE=4 SV=1	M3TGQ4	EHI8A_186020	111 kDa	0	0	0	1.7227	0	0
Gal/GalNAc lectin subunit Igl2 OS=Entamoeba histolytica HM-1:IMSS OX=294381 GN=EHI_065330 PE=4 SV=1	C4M6L0	EHI_065330	120 kDa	7.5219	7.1572	0	1.1485	1.2081	1.8284
Fibrillarin, putative OS=Entamoeba histolytica HM-1:IMSS OX=294381 GN=EHI_118840 PE=3 SV=1	C4LYN2 (+2)	EHI_118840	32 kDa	7.5219	0	3.6962	2.297	2.4162	2.9254
ELMO domain-containing protein OS=Entamoeba histolytica HM-1:IMSS OX=294381 GN=EHI_098830 PE=4 SV=1	C4M876 (+2)	EHI_098830	161 kDa	0	0	0	2.297	0.40271	1.097
FHA domain-containing protein OS=Entamoeba histolytica HM-1:IMSS OX=294381 GN=EHI_129340 PE=4 SV=1	C4M9W7 (+1)	EHI_129340	65 kDa	0	0	0	2.8712	2.4162	2.5597
Fimbrin OS=Entamoeba histolytica HM-1:IMSS OX=294381 GN=EHI_154330 PE=4 SV=1	C4M596 (+1)	EHI_154330	111 kDa	0	0	0	1.1485	1.2081	0.73134
40S ribosomal protein S3, putative OS=Entamoeba histolytica HM-1:IMSS OX=294381 GN=EHI_146340 PE=3 SV=1	C4LT02	EHI_146340	27 kDa	0	3.5786	3.6962	1.7227	0.40271	1.097
Actin-related protein 2/3 complex subunit 4 OS=Entamoeba histolytica HM-1:IMSS OX=294381 GN=EHI_030820 PE=3 SV=1	C4LSV0	EHI_030820	22 kDa	5.0146	7.1572	3.6962	3.4455	2.8189	2.194
Uncharacterized protein OS=Entamoeba histolytica HM-1:IMSS OX=294381 GN=EHI_175270 PE=4 SV=1	C4M3A6 (+2)	EHI_175270	50 kDa	0	0	0	0.57425	2.0135	2.5597
40S ribosomal protein S17, putative OS=Entamoeba histolytica HM-1:IMSS OX=294381 GN=EHI_135060 PE=3 SV=1	C4M0Z2 (+2)	EHI_135060	14 kDa	2.5073	3.5786	11.089	1.1485	0.40271	0.73134
Alpha-1,4 glucan phosphorylase OS=Entamoeba histolytica HM-1:IMSS OX=294381 GN=EHI_096830 PE=3 SV=1	C4LWJ2 (+1)	EHI_096830	102 kDa	0	0	0	1.7227	1.6108	2.9254
Ras family GTPase OS=Entamoeba histolytica HM-1:IMSS OX=294381 GN=EHI_058090 PE=3 SV=1	C4M8B0 (+2)	EHI_058090	21 kDa	2.5073	0	0	0.57425	2.0135	1.8284
Alcohol dehydrogenase, putative OS=Entamoeba histolytica HM-1:IMSS OX=294381 GN=EHI_198760 PE=3 SV=1	C4LWS2 (+1)	EHI_198760	43 kDa	2.5073	0	0	0.57425	0.40271	0.36567
Calmodulin, putative OS=Entamoeba histolytica HM-1:IMSS OX=294381 GN=EHI_148890 PE=4 SV=1	C4LT56 (+1)	EHI_148890	17 kDa	0	0	0	2.297	2.0135	1.097
Actin, putative OS=Entamoeba histolytica HM-1:IMSS OX=294381 GN=EHI_008780 PE=3 SV=1	C4M0P2 (+2)	EHI_008780	85 kDa	5.0146	0	0	2.8712	2.4162	1.4627
60S ribosomal protein L18a OS=Entamoeba histolytica HM-1:IMSS OX=294381 GN=EHI_035600 PE=3 SV=1	C4LXZ0	EHI_035600	20 kDa	10.029	3.5786	7.3924	2.297	2.4162	1.097
rRNA biogenesis protein RRP5, putative OS=Entamoeba histolytica HM-1:IMSS OX=294381 GN=EHI_077270 PE=4 SV=1	C4M2T6	EHI_077270	198 kDa	2.5073	0	0	2.297	2.0135	2.9254
Uncharacterized protein OS=Entamoeba histolytica HM-1:IMSS OX=294381 GN=EHI_190870 PE=4 SV=1	C4M9U9 (+2)	EHI_190870	47 kDa	0	0	0	4.0197	4.4298	4.3881
14-3-3 protein 3 OS=Entamoeba histolytica HM-1:IMSS OX=294381 GN=EHI_006810 PE=3 SV=1	C4M0F4 (+2)	EHI_006810	28 kDa	0	0	0	0.57425	0.40271	0
SnoRNA binding protein, putative OS=Entamoeba histolytica HM-1:IMSS OX=294381 GN=EHI_183900 PE=3 SV=1	C4MAW3 (+1)	EHI_183900	57 kDa	0	0	0	1.7227	4.0271	3.6567
Immuno-dominant variable surface antigen OS=Entamoeba histolytica HM-1:IMSS OX=294381 GN=EHI_015380 PE=4 SV=1	C4M0X6 (+2)	EHI_015380	125 kDa	0	0	0	1.7227	1.6108	2.5597
F-actin-capping protein subunit alpha OS=Entamoeba histolytica HM-1:IMSS OX=294381 GN=EHI_033740 PE=3 SV=1	C4M3N6	EHI_033740	31 kDa	2.5073	0	0	2.297	2.4162	2.194
60S ribosomal protein L6, putative OS=Entamoeba histolytica HM-1:IMSS OX=294381 GN=EHI_045300 PE=3 SV=1	C4LTE3	EHI_045300	23 kDa	7.5219	0	11.089	1.1485	1.6108	1.097
Type A flavoprotein, putative OS=Entamoeba histolytica HM-1:IMSS OX=294381 GN=EHI_096710 PE=4 SV=1	B1N2F9 (+1)	EHI_096710	46 kDa	7.5219	3.5786	3.6962	0.57425	1.2081	0.36567
40S ribosomal protein S9, putative OS=Entamoeba histolytica HM-1:IMSS OX=294381 GN=EHI_179000 PE=3 SV=1	C4LUW3	EHI_179000	21 kDa	5.0146	3.5786	0	1.7227	1.2081	1.097
Ubiquitin, putative OS=Entamoeba histolytica HM-1:IMSS OX=294381 GN=EHI_083270 PE=1 SV=1	C4M760 (+2)	EHI_083270	9 kDa	0	3.5786	3.6962	1.7227	1.6108	1.4627
Skp1 protein, putative OS=Entamoeba histolytica HM-1:IMSS OX=294381 GN=EHI_066770 PE=3 SV=1	C4M261	EHI_066770	18 kDa	2.5073	0	0	2.8712	1.6108	1.097
Calponin homology domain protein, putative OS=Entamoeba histolytica HM-1:IMSS OX=294381 GN=EHI_199000 PE=1 SV=1	C4LWU6 (+2)	EHI_199000	70 kDa	2.5073	3.5786	0	0.57425	0.80541	0.36567
Axoneme-associated protein mst101 OS=Entamoeba histolytica HM-1:IMSS OX=294381 GN=EHI_110740 PE=4 SV=1	C4LUC1 (+2)	EHI_110740	95 kDa	5.0146	0	0	2.297	2.4162	2.194
Protein kinase domain containing protein OS=Entamoeba histolytica HM-1:IMSS OX=294381 GN=EHI_118810 PE=4 SV=1	C4LYM9	EHI_118810	122 kDa	0	0	0	0.57425	0.40271	0.73134
60S ribosomal protein L11, putative OS=Entamoeba histolytica HM-1:IMSS OX=294381 GN=EHI_124300 PE=3 SV=1	C4LZG9 (+2)	EHI_124300	20 kDa	5.0146	3.5786	0	2.8712	2.4162	2.194
Rab family GTPase OS=Entamoeba histolytica HM-1:IMSS OX=294381 GN=EHI_143650 PE=4 SV=1	A0A8U0WP91 (+2)	EHI_143650	23 kDa	5.0146	3.5786	7.3924	0.57425	0.80541	0.73134
Uncharacterized protein OS=Entamoeba histolytica HM-1:IMSS OX=294381 GN=EHI_126950 PE=4 SV=1	C4LWX1 (+1)	EHI_126950	40 kDa	0	0	0	1.7227	1.2081	2.194
Importin N-terminal domain-containing protein OS=Entamoeba histolytica HM-1:IMSS OX=294381 GN=EHI_171760 PE=4 SV=1	C4MAH1	EHI_171760	93 kDa	0	0	0	2.297	1.2081	1.8284
Filamin 2, putative OS=Entamoeba histolytica HM-1:IMSS OX=294381 GN=EHI_104630 PE=4 SV=1	C4LZ72 (+2)	EHI_104630	95 kDa	0	0	0	1.1485	0.80541	1.097
Nucleoporin OS=Entamoeba histolytica HM-1:IMSS OX=294381 GN=EHI_110160 PE=4 SV=1	C4LU70 (+2)	EHI_110160	54 kDa	2.5073	0	0	3.4455	2.8189	1.4627
Elongation factor 2 OS=Entamoeba histolytica HM-1:IMSS OX=294381 GN=EHI_166810 PE=3 SV=1	B1N306 (+2)	EHI_166810	97 kDa	2.5073	3.5786	3.6962	0.57425	0.80541	0
DNA double-strand break repair Rad50 ATPase OS=Entamoeba histolytica HM-1:IMSS OX=294381 GN=EHI_133530 PE=4 SV=1	C4M1L7 (+2)	EHI_133530	72 kDa	0	0	0	0	0	0
Small GTPase Rab7A OS=Entamoeba histolytica HM-1:IMSS OX=294381 GN=EHI_192810 PE=4 SV=1	A0A8U0WPK6 (+2)	EHI_192810	23 kDa	2.5073	0	3.6962	1.7227	1.2081	1.8284
40S ribosomal protein S7 OS=Entamoeba histolytica HM-1:IMSS OX=294381 GN=EHI_140540 PE=3 SV=1	B1N3K9 (+2)	EHI_140540	22 kDa	2.5073	0	0	0	0	0
Histone H4 OS=Entamoeba histolytica HM-1:IMSS OX=294381 GN=EHI_023230 PE=3 SV=1	C4LUN4 (+2)	EHI_023230	13 kDa	0	0	3.6962	2.297	1.6108	1.097
DUF4142 domain-containing protein OS=Entamoeba histolytica HM-1:IMSS OX=294381 GN=EHI_095180 PE=4 SV=1	C4M4T0 (+2)	EHI_095180	34 kDa	0	0	0	2.8712	1.6108	1.4627
Secreted protein OS=Entamoeba histolytica HM-1:IMSS OX=294381 GN=EHI_109920 PE=4 SV=1	C4M3L1 (+2)	EHI_109920	53 kDa	0	0	0	2.8712	0.80541	2.194
Chaperonin 1 60 kDa OS=Entamoeba histolytica HM-1:IMSS OX=294381 GN=EHI_178570 PE=4 SV=1	A0A8U0WP12 (+2)	EHI_178570	57 kDa	0	10.736	25.873	1.1485	0	0
V-type ATPase, A subunit, putative OS=Entamoeba histolytica HM-1:IMSS OX=294381 GN=EHI_043010 PE=3 SV=1	A0A8U0WNY3 (+2)	EHI_043010	67 kDa	0	0	0	1.7227	1.2081	1.097
Actinin-like protein, putative OS=Entamoeba histolytica HM-1:IMSS OX=294381 GN=EHI_155290 PE=4 SV=1	C4LW82 (+1)	EHI_155290	58 kDa	0	0	0	1.1485	0.80541	2.5597
Arp2/3 complex 34 kDa subunit OS=Entamoeba histolytica HM-1:IMSS OX=294381 GN=EHI_091250 PE=3 SV=1	C4M782	EHI_091250	34 kDa	0	0	0	0.57425	1.2081	0.36567
UNC45-central domain-containing protein OS=Entamoeba histolytica HM-1:IMSS OX=294381 GN=EHI_068510 PE=4 SV=1	C4LU42 (+2)	EHI_068510	83 kDa	0	0	0	0.57425	1.6108	1.4627
Uncharacterized protein OS=Entamoeba histolytica HM-1:IMSS OX=294381 GN=EHI_137110 PE=4 SV=1	C4M5Y9	EHI_137110	30 kDa	0	0	0	2.297	2.4162	3.291
Alpha-1,4 glucan phosphorylase (Fragment) OS=Entamoeba histolytica HM-1:IMSS-A OX=885318 GN=EHI7A_165570 PE=3 SV=1	N9TNP8	EHI7A_165570	97 kDa	0	0	0	2.297	0.80541	2.194
SNF7 family protein OS=Entamoeba histolytica HM-1:IMSS OX=294381 GN=EHI_194400 PE=4 SV=1	C4LZV3 (+2)	EHI_194400	28 kDa	0	0	0	3.4455	1.2081	1.8284
NTF2 domain-containing protein OS=Entamoeba histolytica HM-1:IMSS OX=294381 GN=EHI_035490 PE=3 SV=1	C4LXY0 (+2)	EHI_035490	61 kDa	2.5073	0	0	2.297	0.80541	1.4627
Protein PXR1-like OS=Entamoeba histolytica HM-1:IMSS OX=294381 GN=EHI_040340 PE=4 SV=1	C4M2G3	EHI_040340	24 kDa	0	0	0	2.297	2.8189	1.4627
RNA recognition motif domain containing protein OS=Entamoeba histolytica HM-1:IMSS OX=294381 GN=EHI_026440 PE=4 SV=1	C4M5W4 (+2)	EHI_026440	29 kDa	0	0	0	1.7227	1.2081	1.097
Peptidase S59 domain-containing protein OS=Entamoeba histolytica HM-1:IMSS OX=294381 GN=EHI_108620 PE=4 SV=1	C4M830 (+2)	EHI_108620	71 kDa	0	0	0	1.7227	1.6108	1.4627
Protein tyrosine kinase domain-containing protein OS=Entamoeba histolytica HM-1:IMSS OX=294381 GN=EHI_101280 PE=4 SV=1	C4M8B8	EHI_101280	134 kDa	0	0	0	0.57425	0.40271	2.194
Small GTPase Rab11B OS=Entamoeba histolytica HM-1:IMSS OX=294381 GN=EHI_107250 PE=4 SV=1	A0A8U0WPZ4 (+2)	EHI_107250	24 kDa	2.5073	0	0	1.7227	1.2081	2.194
Heat shock protein 70 family OS=Entamoeba histolytica HM-1:IMSS OX=294381 GN=EHI_001950 PE=3 SV=1	C4M5K9 (+2)	EHI_001950	74 kDa	5.0146	14.314	0	1.1485	0.80541	0.36567
40S ribosomal protein S15a, putative OS=Entamoeba histolytica HM-1:IMSS OX=294381 GN=EHI_073600 PE=3 SV=1	C4LXM0 (+2)	EHI_073600	15 kDa	7.5219	7.1572	3.6962	1.1485	0.80541	1.097
60S ribosomal protein L26, putative OS=Entamoeba histolytica HM-1:IMSS OX=294381 GN=EHI_111570 PE=3 SV=1	C4M569 (+2)	EHI_111570	24 kDa	0	0	3.6962	0	0.40271	0.36567
LIM zinc finger domain containing protein OS=Entamoeba histolytica HM-1:IMSS OX=294381 GN=EHI_161940 PE=4 SV=1	C4M6N7 (+2)	EHI_161940	21 kDa	0	0	0	0	0.80541	1.4627
Sulfate adenylyltransferase OS=Entamoeba histolytica HM-1:IMSS OX=294381 GN=EHI_197160 PE=3 SV=1	C4LVD3 (+2)	EHI_197160	48 kDa	2.5073	0	0	1.1485	1.6108	1.097
Uncharacterized protein OS=Entamoeba histolytica HM-1:IMSS OX=294381 GN=EHI_006980 PE=4 SV=1	A0A8U0WPN4	EHI_006980	120 kDa	0	0	0	0	0	1.097
Chromosome partition protein, putative OS=Entamoeba histolytica HM-1:IMSS OX=294381 GN=EHI_155530 PE=4 SV=1	C4LWA4 (+2)	EHI_155530	121 kDa	0	0	0	0.57425	0.40271	0.36567
LisH domain-containing protein OS=Entamoeba histolytica HM-1:IMSS OX=294381 GN=EHI_051420 PE=4 SV=1	C4LY61 (+2)	EHI_051420	106 kDa	0	0	0	2.8712	3.2217	2.5597
DNAJ homolog subfamily A member 1, putative OS=Entamoeba histolytica HM-1:IMSS OX=294381 GN=EHI_182520 PE=4 SV=1	C4LV33 (+2)	EHI_182520	39 kDa	0	0	0	1.7227	1.6108	0.73134
60S ribosomal protein L14, putative OS=Entamoeba histolytica HM-1:IMSS OX=294381 GN=EHI_050130 PE=3 SV=1	C4LTQ0 (+2)	EHI_050130	13 kDa	5.0146	10.736	3.6962	0.57425	1.2081	1.4627
DNA-directed RNA polymerase subunit beta OS=Entamoeba histolytica HM-1:IMSS OX=294381 GN=EHI_186020 PE=3 SV=1	C4MAB3 (+2)	EHI_186020	125 kDa	0	0	0	1.7227	3.2217	2.194
40S ribosomal protein S18, putative OS=Entamoeba histolytica HM-1:IMSS OX=294381 GN=EHI_009680 PE=3 SV=1	C4LZ42 (+3)	EHI_009680	18 kDa	2.5073	10.736	7.3924	0.57425	0.80541	1.097
DNA-directed RNA polymerase III subunit RPC5 OS=Entamoeba histolytica HM-1:IMSS OX=294381 GN=EHI_093820 PE=3 SV=1	C4LYH3 (+2)	EHI_093820	48 kDa	0	0	0	1.7227	1.6108	2.194
60S ribosomal protein L6, putative OS=Entamoeba histolytica HM-1:IMSS OX=294381 GN=EHI_067520 PE=3 SV=1	C4M9F8	EHI_067520	23 kDa	0	0	0	0	0.80541	1.4627
90 kDa heat shock protein, putative OS=Entamoeba histolytica HM-1:IMSS OX=294381 GN=EHI_163480 PE=3 SV=1	C4M3S9 (+2)	EHI_163480	81 kDa	0	0	0	1.7227	0.40271	0
EF-hand domain-containing protein OS=Entamoeba histolytica HM-1:IMSS OX=294381 GN=EHI_017560 PE=4 SV=1	C4M3G1 (+1)	EHI_017560	41 kDa	0	0	0	0	0.80541	0.36567
Fe-S cluster assembly protein NifU, putative OS=Entamoeba histolytica HM-1:IMSS OX=294381 GN=EHI_049620 PE=4 SV=1	A0A8U0WQ51 (+2)	EHI_049620	39 kDa	7.5219	7.1572	7.3924	1.7227	0.40271	0.36567
Uro-adherence factor A, putative OS=Entamoeba histolytica HM-1:IMSS OX=294381 GN=EHI_060430 PE=4 SV=1	C4M6J8	EHI_060430	120 kDa	0	0	0	1.7227	0.80541	0.73134
ATP-binding cassette, putative OS=Entamoeba histolytica HM-1:IMSS OX=294381 GN=EHI_095820 PE=4 SV=1	C4M3D9	EHI_095820	152 kDa	0	0	0	0.57425	0.80541	1.8284
DNA double-strand break repair Rad50 ATPase OS=Entamoeba histolytica HM-1:IMSS OX=294381 GN=EHI_084660 PE=4 SV=1	C4M1J7 (+1)	EHI_084660	122 kDa	0	0	0	1.1485	0.80541	1.4627
Calponin-domain containing family protein OS=Entamoeba histolytica HM-1:IMSS-B OX=885319 GN=EHI8A_180230 PE=4 SV=1	M3US77 (+1)	EHI8A_180230	26 kDa	0	0	0	0	1.2081	1.4627
Protein disulfide isomerase, putative OS=Entamoeba histolytica HM-1:IMSS OX=294381 GN=EHI_071590 PE=3 SV=1	C4MB38	EHI_071590	42 kDa	2.5073	3.5786	3.6962	1.1485	0.80541	0.36567
Uncharacterized protein OS=Entamoeba histolytica HM-1:IMSS OX=294381 GN=EHI_099350 PE=4 SV=1	C4M6C3 (+2)	EHI_099350	24 kDa	0	0	0	3.4455	2.0135	1.4627
Calponin-homology (CH) domain-containing protein OS=Entamoeba histolytica HM-1:IMSS OX=294381 GN=EHI_177190 PE=4 SV=1	C4LY33 (+1)	EHI_177190	84 kDa	0	0	0	1.1485	1.2081	1.097
ATP synthase (E/31 kDa) subunit, putative (Fragment) OS=Entamoeba histolytica HM-1:IMSS-B OX=885319 GN=EHI8A_118640 PE=3 SV=1	M3UU68	EHI8A_118640	45 kDa	0	0	0	0.57425	1.2081	1.4627
60S ribosomal protein L2/L8, putative OS=Entamoeba histolytica HM-1:IMSS OX=294381 GN=EHI_127200 PE=3 SV=1	C4LWZ3	EHI_127200	28 kDa	7.5219	7.1572	7.3924	0.57425	0.80541	0.73134
Enhancer binding protein-2, putative OS=Entamoeba histolytica HM-1:IMSS OX=294381 GN=EHI_182670 PE=4 SV=1	C4LV48 (+2)	EHI_182670	26 kDa	2.5073	3.5786	0	0.57425	0.40271	0.73134
Uncharacterized protein OS=Entamoeba histolytica HM-1:IMSS OX=294381 GN=EHI_047800 PE=4 SV=1	C4M7X1 (+1)	EHI_047800	34 kDa	0	0	0	1.7227	1.2081	1.097
Mucin-2, putative OS=Entamoeba histolytica HM-1:IMSS OX=294381 GN=EHI_173410 PE=3 SV=1	C4M6H8	EHI_173410	59 kDa	0	0	0	1.1485	1.2081	1.4627
Coronin OS=Entamoeba histolytica HM-1:IMSS OX=294381 GN=EHI_122800 PE=3 SV=1	C4M5M6 (+1)	EHI_122800	187 kDa	0	0	0	1.7227	2.0135	0.73134
PPM-type phosphatase domain-containing protein OS=Entamoeba histolytica HM-1:IMSS OX=294381 GN=EHI_138330 PE=4 SV=1	C4M3H6 (+1)	EHI_138330	102 kDa	5.0146	0	0	2.297	2.4162	1.8284
Adhesin 112 (EhADH112) OS=Entamoeba histolytica HM-1:IMSS OX=294381 GN=EHI_181220 PE=4 SV=1	A0A8U0WNY2 (+2)	EHI_181220	78 kDa	0	0	0	2.297	0.80541	0
Malate dehydrogenase, putative OS=Entamoeba histolytica HM-1:IMSS OX=294381 GN=EHI_165350 PE=1 SV=1	C4M213 (+2)	EHI_165350	40 kDa	0	3.5786	7.3924	0.57425	0	0.73134
60S ribosomal protein L32, putative OS=Entamoeba histolytica HM-1:IMSS OX=294381 GN=EHI_092430 PE=3 SV=1	C4LV05 (+3)	EHI_092430	16 kDa	5.0146	0	11.089	1.1485	2.8189	1.8284
Actin-related protein 3, putative OS=Entamoeba histolytica HM-1:IMSS OX=294381 GN=EHI_198930 PE=3 SV=1	C4LWT9 (+2)	EHI_198930	47 kDa	0	0	0	0.57425	1.6108	0.73134
Actin binding protein, putative OS=Entamoeba histolytica HM-1:IMSS OX=294381 GN=EHI_104390 PE=4 SV=1	C4LZ50	EHI_104390	64 kDa	2.5073	0	0	1.7227	0.80541	0.36567
Zinc finger, C2H2 type family protein OS=Entamoeba histolytica HM-1:IMSS OX=294381 GN=EHI_158220 PE=4 SV=1	C4M2E1 (+2)	EHI_158220	42 kDa	0	0	0	1.1485	1.2081	1.097
40S ribosomal protein S5, putative OS=Entamoeba histolytica HM-1:IMSS OX=294381 GN=EHI_044590 PE=3 SV=1	C4LT81	EHI_044590	23 kDa	2.5073	3.5786	3.6962	0	0.80541	1.4627
40S ribosomal protein S16, putative OS=Entamoeba histolytica HM-1:IMSS OX=294381 GN=EHI_038620 PE=3 SV=1	C4LZP6	EHI_038620	17 kDa	5.0146	14.314	3.6962	1.1485	1.2081	0.73134
Actin-related protein 2/3 complex subunit 3 OS=Entamoeba histolytica HM-1:IMSS OX=294381 GN=EHI_174910 PE=3 SV=1	C4LZL6 (+1)	EHI_174910	22 kDa	7.5219	0	0	1.1485	0.80541	0.73134
Nucleoporin p58/p45 OS=Entamoeba histolytica HM-1:IMSS OX=294381 GN=EHI_010010 PE=4 SV=1	C4M0R5 (+2)	EHI_010010	33 kDa	5.0146	0	0	2.297	0.80541	2.194
Uncharacterized protein OS=Entamoeba histolytica HM-1:IMSS OX=294381 GN=EHI_020080 PE=4 SV=1	C4MAN1 (+2)	EHI_020080	32 kDa	0	0	0	1.1485	2.4162	1.097
Syntaxin binding protein, putative OS=Entamoeba histolytica HM-1:IMSS OX=294381 GN=EHI_093130 PE=4 SV=1	A0A8U0WPZ7 (+1)	EHI_093130	70 kDa	0	0	0	0	1.6108	2.5597
40S ribosomal protein S14, putative OS=Entamoeba histolytica HM-1:IMSS OX=294381 GN=EHI_012360 PE=3 SV=1	B1N2I3 (+2)	EHI_012360	16 kDa	0	0	3.6962	0.57425	0	0.36567
C2 domain containing protein OS=Entamoeba histolytica HM-1:IMSS OX=294381 GN=EHI_069320 PE=4 SV=1	C4LWM0 (+2)	EHI_069320	21 kDa	5.0146	0	0	1.1485	0.80541	1.4627
EF-hand calcium-binding domain containing protein OS=Entamoeba histolytica HM-1:IMSS OX=294381 GN=EHI_016120 PE=4 SV=1	C4MAN5 (+2)	EHI_016120	76 kDa	0	0	0	2.8712	1.6108	1.097
Ran-binding protein, putative OS=Entamoeba histolytica HM-1:IMSS OX=294381 GN=EHI_009630 PE=3 SV=1	C4LZ37 (+2)	EHI_009630	120 kDa	0	0	0	1.7227	2.4162	1.8284
Vesicle-fusing ATPase OS=Entamoeba histolytica HM-1:IMSS OX=294381 GN=EHI_004640 PE=3 SV=1	C4LYS4 (+2)	EHI_004640	83 kDa	0	0	0	0.57425	0.80541	0.73134
Serine-threonine-isoleucine rich protein, putative OS=Entamoeba histolytica HM-1:IMSS OX=294381 GN=EHI_073630 PE=4 SV=1	C4LXM3 (+1)	EHI_073630	559 kDa	0	0	0	0.57425	0	0
RhoGAP domain containing protein OS=Entamoeba histolytica HM-1:IMSS OX=294381 GN=EHI_049570 PE=4 SV=1	C4LUF8	EHI_049570	73 kDa	5.0146	3.5786	11.089	0	0	0
VPS9 domain-containing protein OS=Entamoeba histolytica HM-1:IMSS OX=294381 GN=EHI_163600 PE=4 SV=1	C4M3U1 (+2)	EHI_163600	71 kDa	0	0	0	1.1485	0.80541	1.097
GTP-binding nuclear protein OS=Entamoeba histolytica HM-1:IMSS OX=294381 GN=EHI_148190 PE=3 SV=1	C4LSY9 (+2)	EHI_148190	25 kDa	0	0	0	1.1485	0.80541	1.4627
C2 domain containing protein OS=Entamoeba histolytica HM-1:IMSS OX=294381 GN=EHI_059860 PE=4 SV=1	C4M344	EHI_059860	22 kDa	5.0146	0	0	1.1485	1.2081	1.4627
Dynamin-like protein OS=Entamoeba histolytica HM-1:IMSS OX=294381 GN=EHI_052740 PE=3 SV=1	C4M3R5 (+2)	EHI_052740	75 kDa	0	3.5786	3.6962	1.7227	0.80541	0
Centromere/microtubule binding protein cbf5, putative OS=Entamoeba histolytica HM-1:IMSS OX=294381 GN=EHI_115300 PE=3 SV=1	C4M8E1 (+2)	EHI_115300	54 kDa	0	0	0	1.7227	1.6108	1.097
Transmembrane domain-containing protein OS=Entamoeba histolytica HM-1:IMSS OX=294381 GN=EHI_158120 PE=4 SV=1	C4M2D1 (+2)	EHI_158120	59 kDa	0	0	0	0.57425	0.80541	0.36567
Protein kinase domain containing protein OS=Entamoeba histolytica HM-1:IMSS OX=294381 GN=EHI_110250 PE=4 SV=1	C4LU78 (+2)	EHI_110250	72 kDa	0	0	0	2.297	1.2081	1.097
Uncharacterized protein OS=Entamoeba histolytica HM-1:IMSS OX=294381 GN=EHI_155590 PE=4 SV=1	C4LWB0 (+2)	EHI_155590	20 kDa	2.5073	0	0	0.57425	0.40271	0.73134
Uncharacterized protein OS=Entamoeba histolytica HM-1:IMSS OX=294381 GN=EHI_031390 PE=4 SV=1	C4M4L6 (+2)	EHI_031390	20 kDa	0	0	0	2.297	1.2081	0.36567
WD domain containing protein OS=Entamoeba histolytica HM-1:IMSS OX=294381 GN=EHI_118780 PE=4 SV=1	C4LYM6 (+2)	EHI_118780	38 kDa	0	0	0	0.57425	1.2081	1.097
RING-type domain-containing protein OS=Entamoeba histolytica HM-1:IMSS OX=294381 GN=EHI_192840 PE=4 SV=1	B1N4D3 (+2)	EHI_192840	82 kDa	0	0	0	0	1.6108	1.097
Axoneme-associated protein mst101 OS=Entamoeba histolytica HM-1:IMSS OX=294381 GN=EHI_177640 PE=4 SV=1	C4LY17 (+2)	EHI_177640	56 kDa	0	0	0	1.7227	0.40271	0.36567
Soluble calcium-activated nucleotidase 1, putative OS=Entamoeba histolytica HM-1:IMSS OX=294381 GN=EHI_103690 PE=3 SV=1	C4LVL3 (+2)	EHI_103690	39 kDa	2.5073	0	0	1.7227	1.2081	1.4627
Uncharacterized protein OS=Entamoeba histolytica HM-1:IMSS OX=294381 GN=EHI_021190 PE=4 SV=1	C4M035	EHI_021190	39 kDa	0	0	0	0	0.40271	0.36567
p-glycoprotein-1 OS=Entamoeba histolytica HM-1:IMSS OX=294381 GN=EHI_114150 PE=4 SV=1	C4M422	EHI_114150	145 kDa	0	0	0	0.57425	2.0135	2.194
14-3-3 protein 1 OS=Entamoeba histolytica HM-1:IMSS OX=294381 GN=EHI_025360 PE=3 SV=1	C4M323 (+2)	EHI_025360	27 kDa	0	0	0	0	0	0
Axoneme-associated protein OS=Entamoeba histolytica HM-1:IMSS OX=294381 GN=EHI_117850 PE=4 SV=1	C4LYW9 (+2)	EHI_117850	18 kDa	0	0	0	1.1485	0.80541	1.097
Phospholipid-transporting ATPase OS=Entamoeba histolytica HM-1:IMSS OX=294381 GN=EHI_096620 PE=3 SV=1	C4LWH4 (+2)	EHI_096620	132 kDa	0	0	0	1.1485	1.2081	1.8284
C2 domain protein, putative OS=Entamoeba histolytica HM-1:IMSS OX=294381 GN=EHI_015290 PE=3 SV=1	C4M0W7 (+2)	EHI_015290	30 kDa	0	0	0	1.7227	1.6108	1.097
Protein tyrosine kinase domain-containing protein OS=Entamoeba histolytica HM-1:IMSS OX=294381 GN=EHI_201270 PE=4 SV=1	C4M6Q6	EHI_201270	134 kDa	0	0	0	1.1485	0	1.4627
60S ribosomal protein L10, putative OS=Entamoeba histolytica HM-1:IMSS OX=294381 GN=EHI_044810 PE=3 SV=1	C4LTA0	EHI_044810	24 kDa	2.5073	0	0	0	0	1.097
Vacuolar protein sorting-associated protein OS=Entamoeba histolytica HM-1:IMSS OX=294381 GN=EHI_055720 PE=4 SV=1	C4M7B4 (+2)	EHI_055720	66 kDa	0	0	0	1.7227	2.4162	2.194
WD_REPEATS_REGION domain-containing protein OS=Entamoeba histolytica HM-1:IMSS OX=294381 GN=EHI_104430 PE=4 SV=1	C4LZ54 (+2)	EHI_104430	73 kDa	0	0	0	0	0	0
20 kDa antigen OS=Entamoeba histolytica HM-1:IMSS OX=294381 GN=EHI_057670 PE=4 SV=1	C4M6Z9 (+1)	EHI_057670	21 kDa	5.0146	3.5786	0	0.57425	0.80541	1.097
DNA double-strand break repair Rad50 ATPase OS=Entamoeba histolytica HM-1:IMSS OX=294381 GN=EHI_122900 PE=4 SV=1	C4M5M1 (+1)	EHI_122900	74 kDa	0	0	0	2.8712	0.80541	1.097
60S ribosomal protein L24, putative OS=Entamoeba histolytica HM-1:IMSS OX=294381 GN=EHI_030760 PE=3 SV=1	C4LSA0	EHI_030760	19 kDa	2.5073	7.1572	0	0	0	0.73134
LIM zinc finger domain containing protein OS=Entamoeba histolytica HM-1:IMSS OX=294381 GN=EHI_025450 PE=4 SV=1	C4M332 (+2)	EHI_025450	25 kDa	0	0	0	1.7227	1.2081	1.4627
Phosphoglycerate kinase OS=Entamoeba histolytica HM-1:IMSS OX=294381 GN=EHI_188180 PE=3 SV=1	C4M192 (+2)	EHI_188180	45 kDa	0	0	0	0.57425	0	0
60S ribosomal protein L13, putative OS=Entamoeba histolytica HM-1:IMSS OX=294381 GN=EHI_181560 PE=3 SV=1	C4M8R8	EHI_181560	33 kDa	0	0	0	0	0.40271	0.36567
Uncharacterized protein OS=Entamoeba histolytica HM-1:IMSS OX=294381 GN=EHI_048240 PE=4 SV=1	C4M4B5 (+2)	EHI_048240	20 kDa	0	0	0	1.1485	0.40271	0.36567
V-type proton ATPase subunit OS=Entamoeba histolytica HM-1:IMSS OX=294381 GN=EHI_106350 PE=3 SV=1	C4M399 (+2)	EHI_106350	40 kDa	0	0	0	0.57425	0	0.73134
Cell surface protease gp63, putative OS=Entamoeba histolytica HM-1:IMSS OX=294381 GN=EHI_200230 PE=3 SV=1	C4M7M4 (+2)	EHI_200230	72 kDa	0	0	0	1.1485	0.80541	1.097
NTF2 domain-containing protein OS=Entamoeba histolytica HM-1:IMSS OX=294381 GN=EHI_080900 PE=3 SV=1	C4MAD6 (+2)	EHI_080900	52 kDa	0	0	0	0	0.40271	0
Transmembrane protein OS=Entamoeba histolytica HM-1:IMSS OX=294381 GN=EHI_088470 PE=4 SV=1	C4MA16 (+2)	EHI_088470	19 kDa	0	0	0	1.1485	2.0135	1.8284
Uncharacterized protein OS=Entamoeba histolytica HM-1:IMSS OX=294381 GN=EHI_170460 PE=4 SV=1	A0A8U0WQ52 (+2)	EHI_170460	39 kDa	0	0	0	0.57425	1.2081	0.73134
Uncharacterized protein OS=Entamoeba histolytica HM-1:IMSS-B OX=885319 GN=EHI8A_039800 PE=4 SV=1	M3THR8 (+1)	EHI8A_039800	29 kDa	0	0	3.6962	1.7227	1.6108	0.73134
Malic enzyme, putative OS=Entamoeba histolytica HM-1:IMSS OX=294381 GN=EHI_044970 PE=1 SV=1	A0A8U0WNY6 (+3)	EHI_044970	53 kDa	10.029	3.5786	0	1.1485	0	0
CHAD domain-containing protein OS=Entamoeba histolytica HM-1:IMSS OX=294381 GN=EHI_182980 PE=4 SV=1	B1N2P1	EHI_182980	34 kDa	0	0	0	0.57425	0	0
Peptidase S74 domain-containing protein OS=Entamoeba histolytica HM-1:IMSS OX=294381 GN=EHI_185450 PE=4 SV=1	B1N494	EHI_185450	94 kDa	2.5073	0	0	0.57425	0	1.097
Histone H1-like nucleoprotein HC2 OS=Entamoeba histolytica HM-1:IMSS OX=294381 GN=EHI_096340 PE=4 SV=1	C4LWE7 (+2)	EHI_096340	40 kDa	0	0	0	0	2.0135	0.36567
F_actin_bund_C domain-containing protein OS=Entamoeba histolytica HM-1:IMSS OX=294381 GN=EHI_004550 PE=4 SV=1	C4LYR5 (+1)	EHI_004550	45 kDa	0	0	0	0	0	0.36567
Rab family GTPase OS=Entamoeba histolytica HM-1:IMSS OX=294381 GN=EHI_199820 PE=4 SV=1	A0A8U0WPS5 (+2)	EHI_199820	22 kDa	0	7.1572	0	1.7227	0.80541	1.4627
SNF7 family protein OS=Entamoeba histolytica HM-1:IMSS OX=294381 GN=EHI_169820 PE=4 SV=1	C4M1A5 (+2)	EHI_169820	24 kDa	0	0	0	1.1485	0.40271	0.73134
WH2 domain-containing protein OS=Entamoeba histolytica HM-1:IMSS OX=294381 GN=EHI_016130 PE=4 SV=1	C4MAN6 (+2)	EHI_016130	56 kDa	0	0	0	2.297	0.80541	0.36567
Chromosome partition protein Smc OS=Entamoeba histolytica HM-1:IMSS OX=294381 GN=EHI_107130 PE=4 SV=1	C4M154 (+1)	EHI_107130	40 kDa	0	0	0	0	0.80541	0.73134
60S ribosomal protein L17, putative OS=Entamoeba histolytica HM-1:IMSS OX=294381 GN=EHI_127330 PE=3 SV=1	C4LX05 (+1)	EHI_127330	20 kDa	5.0146	10.736	0	0.57425	1.2081	0.73134
Profilin OS=Entamoeba histolytica HM-1:IMSS OX=294381 GN=EHI_176140 PE=3 SV=1	C4MB21 (+2)	EHI_176140	13 kDa	0	0	3.6962	0	0.40271	0.36567
Rab family GTPase OS=Entamoeba histolytica HM-1:IMSS OX=294381 GN=EHI_046390 PE=4 SV=1	A0A8U0WQ41	EHI_046390	24 kDa	0	0	0	0.57425	0.80541	0.73134
Nucleoporin NUP53 OS=Entamoeba histolytica HM-1:IMSS OX=294381 GN=EHI_026310 PE=4 SV=1	C4M5V9 (+2)	EHI_026310	51 kDa	0	0	0	0	2.0135	0.73134
Uncharacterized protein OS=Entamoeba histolytica HM-1:IMSS OX=294381 GN=EHI_192420 PE=4 SV=1	C4M1G2 (+1)	EHI_192420	34 kDa	0	0	0	0	1.6108	1.8284
Uncharacterized protein OS=Entamoeba histolytica HM-1:IMSS-B OX=885319 GN=EHI8A_147110 PE=4 SV=1	M3S967 (+1)	EHI8A_147110	30 kDa	0	0	0	1.1485	1.2081	0.73134
DNA-directed RNA polymerase II large subunit, putative OS=Entamoeba histolytica HM-1:IMSS OX=294381 GN=EHI_121760 PE=4 SV=1	A0A8U0WPB3 (+2)	EHI_121760	185 kDa	0	0	0	2.297	0.40271	1.4627
Caldesmon OS=Entamoeba histolytica HM-1:IMSS OX=294381 GN=EHI_092080 PE=4 SV=1	C4LUX3 (+2)	EHI_092080	58 kDa	0	0	0	0.57425	0.40271	0.73134
RhoGAP domain containing protein OS=Entamoeba histolytica HM-1:IMSS OX=294381 GN=EHI_017650 PE=4 SV=1	C4M3H0 (+2)	EHI_017650	48 kDa	0	0	0	0	0.80541	1.097
Beige/BEACH domain containing protein OS=Entamoeba histolytica HM-1:IMSS OX=294381 GN=EHI_175420 PE=4 SV=1	C4M3A9 (+2)	EHI_175420	100 kDa	0	0	0	0	1.2081	2.9254
Proteasome subunit alpha type OS=Entamoeba histolytica HM-1:IMSS OX=294381 GN=EHI_163650 PE=3 SV=1	C4M3U5 (+1)	EHI_163650	28 kDa	0	0	3.6962	1.1485	0.80541	0.73134
Enhancer binding protein-1 OS=Entamoeba histolytica HM-1:IMSS OX=294381 GN=EHI_121780 PE=4 SV=1	C4M5C4 (+2)	EHI_121780	35 kDa	5.0146	3.5786	3.6962	1.1485	0.40271	0
CXXC-rich protein OS=Entamoeba histolytica HM-1:IMSS OX=294381 GN=EHI_111990 PE=3 SV=1	C4M7I1 (+2)	EHI_111990	131 kDa	0	0	0	0	1.6108	1.4627
Uncharacterized protein OS=Entamoeba histolytica HM-1:IMSS OX=294381 GN=EHI_107040 PE=4 SV=1	A0A8U0WP02 (+2)	EHI_107040	32 kDa	0	0	0	1.1485	0.80541	1.097
Ccaat-box-binding transcription factor, putative OS=Entamoeba histolytica HM-1:IMSS OX=294381 GN=EHI_132370 PE=3 SV=1	C4M8Q0 (+2)	EHI_132370	84 kDa	0	0	0	0.57425	1.2081	1.097
V-type proton ATPase subunit a OS=Entamoeba histolytica HM-1:IMSS OX=294381 GN=EHI_074020 PE=3 SV=1	C4M2Z1 (+2)	EHI_074020	93 kDa	0	0	0	1.1485	0.80541	0.73134
WD domain, G-beta repeat protein OS=Entamoeba histolytica HM-1:IMSS OX=294381 GN=EHI_178780 PE=4 SV=1	C4LUU2 (+2)	EHI_178780	102 kDa	0	0	0	0.57425	1.6108	0.73134
Protein serine/threonine kinase OS=Entamoeba histolytica HM-1:IMSS OX=294381 GN=EHI_052880 PE=4 SV=1	C4M3S6 (+2)	EHI_052880	200 kDa	0	0	0	0	0.40271	0.36567
Heat shock protein 90, putative OS=Entamoeba histolytica HM-1:IMSS OX=294381 GN=EHI_102270 PE=3 SV=1	C4MBP1 (+1)	EHI_102270	83 kDa	0	0	0	2.8712	0.80541	0
Adenylyl-sulfate kinase OS=Entamoeba histolytica HM-1:IMSS OX=294381 GN=EHI_179080 PE=3 SV=1	C4LUW9 (+2)	EHI_179080	53 kDa	0	0	0	1.1485	1.2081	1.097
LisH domain-containing protein OS=Entamoeba histolytica HM-1:IMSS OX=294381 GN=EHI_138520 PE=4 SV=1	C4M3J4 (+2)	EHI_138520	111 kDa	0	0	0	1.1485	1.6108	1.097
Helicase, putative OS=Entamoeba histolytica HM-1:IMSS OX=294381 GN=EHI_044890 PE=4 SV=1	C4LTA8 (+2)	EHI_044890	112 kDa	0	0	0	1.7227	2.4162	1.8284
TBC domain containing protein OS=Entamoeba histolytica HM-1:IMSS OX=294381 GN=EHI_009510 PE=4 SV=1	C4LZ27 (+2)	EHI_009510	36 kDa	0	0	0	0.57425	0.80541	0.73134
5'-3' exoribonuclease OS=Entamoeba histolytica HM-1:IMSS OX=294381 GN=EHI_132400 PE=3 SV=1	C4M8Q3 (+2)	EHI_132400	92 kDa	0	0	0	0	1.6108	1.4627
Transcription elongation factor spt6 OS=Entamoeba histolytica HM-1:IMSS OX=294381 GN=EHI_092290 PE=4 SV=1	C4LUZ3	EHI_092290	145 kDa	0	0	0	1.1485	0.40271	1.4627
40S ribosomal protein S24, putative OS=Entamoeba histolytica HM-1:IMSS OX=294381 GN=EHI_148820 PE=3 SV=1	C4LT49 (+2)	EHI_148820	16 kDa	5.0146	0	0	1.1485	0.80541	0.36567
Coronin OS=Entamoeba histolytica HM-1:IMSS OX=294381 GN=EHI_083590 PE=3 SV=1	C4M943 (+1)	EHI_083590	48 kDa	0	0	0	0.57425	0.40271	0.36567
60S ribosomal protein L7, putative OS=Entamoeba histolytica HM-1:IMSS OX=294381 GN=EHI_025830 PE=3 SV=1	C4M938	EHI_025830	26 kDa	0	0	0	0	0	0
Nucleolar GTP-binding protein 1 OS=Entamoeba histolytica HM-1:IMSS OX=294381 GN=EHI_174940 PE=3 SV=1	C4LZL9 (+1)	EHI_174940	76 kDa	0	0	0	0.57425	0.80541	2.194
Viral A-type inclusion protein OS=Entamoeba histolytica HM-1:IMSS OX=294381 GN=EHI_064640 PE=4 SV=1	C4M0D0 (+2)	EHI_064640	31 kDa	0	0	0	2.8712	0.40271	0.73134
Sec1 family protein OS=Entamoeba histolytica HM-1:IMSS OX=294381 GN=EHI_060310 PE=4 SV=1	C4M6I8 (+2)	EHI_060310	53 kDa	0	0	0	0.57425	0.40271	1.4627
ShKT domain-containing protein OS=Entamoeba histolytica HM-1:IMSS OX=294381 GN=EHI_050520 PE=4 SV=1	C4LTS5 (+2)	EHI_050520	25 kDa	0	0	0	0.57425	0	0
60S acidic ribosomal protein P0 OS=Entamoeba histolytica HM-1:IMSS OX=294381 GN=EHI_090400 PE=3 SV=1	B1N2Z3	EHI_090400	34 kDa	10.029	0	0	0.57425	0.40271	0
26s proteasome subunit P45 family protein, putative OS=Entamoeba histolytica HM-1:IMSS OX=294381 GN=EHI_177320 PE=3 SV=1	C4LY36 (+2)	EHI_177320	44 kDa	0	0	0	2.297	0.80541	0.73134
Uncharacterized protein OS=Entamoeba histolytica HM-1:IMSS OX=294381 GN=EHI_131050 PE=4 SV=1	C4LXH3 (+2)	EHI_131050	52 kDa	0	0	0	1.7227	1.2081	0.36567
Galactose-inhibitable lectin small subunit, putative OS=Entamoeba histolytica HM-1:IMSS OX=294381 GN=EHI_159870 PE=4 SV=1	B1N2V4 (+2)	EHI_159870	31 kDa	0	0	0	0.57425	1.6108	1.097
Axoneme-associated protein mst101(2)-like OS=Entamoeba histolytica HM-1:IMSS OX=294381 GN=EHI_096350 PE=4 SV=1	C4LWE8 (+2)	EHI_096350	59 kDa	0	0	0	1.1485	1.2081	0.36567
Gal/GalNAc lectin heavy subunit, putative OS=Entamoeba histolytica HM-1:IMSS OX=294381 GN=EHI_046650 PE=4 SV=1	C4M7A1 (+1)	EHI_046650	135 kDa	0	0	0	0	0	0.73134
Rho guanine nucleotide exchange factor, putative OS=Entamoeba histolytica HM-1:IMSS OX=294381 GN=EHI_078740 PE=1 SV=1	C4M4E9 (+2)	EHI_078740	99 kDa	0	0	0	0	1.2081	0.36567
DNA double-strand break repair Rad50 ATPase OS=Entamoeba histolytica HM-1:IMSS OX=294381 GN=EHI_066720 PE=4 SV=1	C4MAC6 (+2)	EHI_066720	242 kDa	0	0	0	1.1485	0.80541	1.097
60S ribosomal protein L12, putative OS=Entamoeba histolytica HM-1:IMSS OX=294381 GN=EHI_030710 PE=3 SV=1	C4M1E1	EHI_030710	18 kDa	5.0146	0	0	0.57425	1.2081	1.097
60S ribosomal protein L7, putative OS=Entamoeba histolytica HM-1:IMSS OX=294381 GN=EHI_010650 PE=3 SV=1	C4LYV2 (+2)	EHI_010650	26 kDa	5.0146	0	11.089	0.57425	0.40271	0.36567
Transmembrane protein OS=Entamoeba histolytica HM-1:IMSS OX=294381 GN=EHI_068670 PE=4 SV=1	C4LU57 (+2)	EHI_068670	19 kDa	0	0	0	2.297	1.2081	0.73134
Uncharacterized protein OS=Entamoeba histolytica HM-1:IMSS OX=294381 GN=EHI_182730 PE=4 SV=1	C4LV54 (+2)	EHI_182730	19 kDa	0	0	0	0.57425	0.40271	0.36567
Serine/threonine protein kinase OS=Entamoeba histolytica HM-1:IMSS OX=294381 GN=EHI_015420 PE=4 SV=1	B1N399 (+2)	EHI_015420	85 kDa	0	0	0	1.1485	0.80541	0.73134
Uncharacterized protein OS=Entamoeba histolytica HM-1:IMSS OX=294381 GN=EHI_069150 PE=4 SV=1	B1N2T7 (+2)	EHI_069150	39 kDa	0	0	0	1.1485	0.80541	1.097
ANK_REP_REGION domain-containing protein OS=Entamoeba histolytica HM-1:IMSS OX=294381 GN=EHI_021460 PE=4 SV=1	C4M060 (+2)	EHI_021460	82 kDa	0	0	0	0.57425	0.80541	1.097
40S ribosomal protein S13, putative OS=Entamoeba histolytica HM-1:IMSS OX=294381 GN=EHI_035460 PE=3 SV=1	A0A175JJM9 (+1)	EHI_035460	17 kDa	0	0	3.6962	0.57425	1.2081	0.36567
TLDc domain-containing protein OS=Entamoeba histolytica HM-1:IMSS OX=294381 GN=EHI_201280 PE=4 SV=1	C4M6Q7 (+2)	EHI_201280	45 kDa	2.5073	0	0	1.1485	2.0135	1.4627
Secreted protein OS=Entamoeba histolytica HM-1:IMSS OX=294381 GN=EHI_050510 PE=4 SV=1	C4LTS4 (+2)	EHI_050510	42 kDa	0	0	0	0.57425	1.2081	0.73134
F-box only protein OS=Entamoeba histolytica HM-1:IMSS OX=294381 GN=EHI_153290 PE=4 SV=1	C4LSC0 (+2)	EHI_153290	47 kDa	0	0	0	1.1485	0.40271	0
LTXXQ motif family protein OS=Entamoeba histolytica HM-1:IMSS OX=294381 GN=EHI_108710 PE=4 SV=1	C4M835 (+2)	EHI_108710	16 kDa	0	0	0	0.57425	0.80541	0.73134
p-glycoprotein-5 OS=Entamoeba histolytica HM-1:IMSS OX=294381 GN=EHI_175450 PE=4 SV=1	C4M3B2	EHI_175450	145 kDa	0	0	0	0	1.2081	0
Uncharacterized protein OS=Entamoeba histolytica HM-1:IMSS OX=294381 GN=EHI_025370 PE=4 SV=1	C4M324 (+2)	EHI_025370	96 kDa	0	0	0	0.57425	0	0
Vacuolar ATP synthase subunit E, putative OS=Entamoeba histolytica HM-1:IMSS OX=294381 GN=EHI_182560 PE=3 SV=1	C4LV37 (+1)	EHI_182560	25 kDa	0	0	0	0	0.80541	0
40S ribosomal protein S11, putative OS=Entamoeba histolytica HM-1:IMSS OX=294381 GN=EHI_155410 PE=3 SV=1	C4LW92 (+1)	EHI_155410	18 kDa	2.5073	0	3.6962	0	0.80541	0.36567
60S ribosomal protein L7, putative OS=Entamoeba histolytica HM-1:IMSS OX=294381 GN=EHI_141990 PE=4 SV=1	C4LW44 (+2)	EHI_141990	29 kDa	0	0	0	2.297	1.2081	0.73134
Cortexillin, putative OS=Entamoeba histolytica HM-1:IMSS OX=294381 GN=EHI_104560 PE=4 SV=1	B1N341	EHI_104560	65 kDa	0	0	0	1.1485	0.40271	0.36567
SH3 domain-containing protein OS=Entamoeba histolytica HM-1:IMSS OX=294381 GN=EHI_130920 PE=3 SV=1	C4LXG0 (+1)	EHI_130920	280 kDa	0	0	0	0	0.40271	0
NUC173 domain-containing protein OS=Entamoeba histolytica HM-1:IMSS OX=294381 GN=EHI_092660 PE=3 SV=1	C4LV26 (+2)	EHI_092660	129 kDa	0	0	0	0.57425	1.6108	1.4627
Rab family GTPase OS=Entamoeba histolytica HM-1:IMSS OX=294381 GN=EHI_005460 PE=4 SV=1	A0A8U0WP83 (+2)	EHI_005460	23 kDa	0	0	0	0	0	0
Conserved secreted protein OS=Entamoeba histolytica HM-1:IMSS OX=294381 GN=EHI_148240 PE=4 SV=1	C4LSZ4 (+2)	EHI_148240	15 kDa	0	0	0	0	0	0
Nucleotide binding protein 2, putative OS=Entamoeba histolytica HM-1:IMSS OX=294381 GN=EHI_000610 PE=3 SV=1	C4LZB2 (+2)	EHI_000610	29 kDa	0	0	0	0	0.40271	0
Uncharacterized protein OS=Entamoeba histolytica HM-1:IMSS OX=294381 GN=EHI_067090 PE=4 SV=1	C4MA45 (+2)	EHI_067090	24 kDa	5.0146	0	0	1.1485	1.6108	1.097
Histone H2A OS=Entamoeba histolytica HM-1:IMSS OX=294381 GN=EHI_188960 PE=3 SV=1	C4M2W3	EHI_188960	18 kDa	0	0	0	0.57425	0.80541	0.36567
Uncharacterized protein OS=Entamoeba histolytica HM-1:IMSS OX=294381 GN=EHI_069560 PE=4 SV=1	C4LWP4 (+2)	EHI_069560	23 kDa	0	0	0	0.57425	0.80541	0.36567
Formin 2 OS=Entamoeba histolytica HM-1:IMSS OX=294381 GN=EHI_188820 PE=4 SV=1	C4M2U9 (+2)	EHI_188820	59 kDa	0	0	0	0	2.0135	1.8284
MIT domain protein OS=Entamoeba histolytica HM-1:IMSS OX=294381 GN=EHI_093860 PE=4 SV=1	C4LYH7 (+1)	EHI_093860	76 kDa	0	0	0	1.1485	0.40271	0.36567
RRM domain-containing protein OS=Entamoeba histolytica HM-1:IMSS OX=294381 GN=EHI_048650 PE=4 SV=1	C4M2X8 (+2)	EHI_048650	19 kDa	0	0	0	1.7227	1.6108	1.4627
Intracellular protein transport protein USO1, putative OS=Entamoeba histolytica HM-1:IMSS OX=294381 GN=EHI_147540 PE=4 SV=1	B1N402 (+1)	EHI_147540	109 kDa	0	0	0	0.57425	0	0
VHS domain-containing protein OS=Entamoeba histolytica HM-1:IMSS OX=294381 GN=EHI_004370 PE=4 SV=1	C4LYQ0 (+2)	EHI_004370	39 kDa	2.5073	0	0	0	1.2081	1.4627
TolA protein, putative OS=Entamoeba histolytica HM-1:IMSS OX=294381 GN=EHI_159620 PE=4 SV=1	C4LX42 (+2)	EHI_159620	35 kDa	0	0	0	0	0	0
Sec1 family protein OS=Entamoeba histolytica HM-1:IMSS OX=294381 GN=EHI_160900 PE=4 SV=1	A0A8U0WPJ0 (+2)	EHI_160900	60 kDa	0	0	0	0	0.40271	0.73134
Uncharacterized protein OS=Entamoeba histolytica HM-1:IMSS OX=294381 GN=EHI_068490 PE=4 SV=1	C4LU40 (+2)	EHI_068490	36 kDa	0	0	0	2.297	1.6108	1.4627
Heat shock protein, putative OS=Entamoeba histolytica HM-1:IMSS OX=294381 GN=EHI_022620 PE=3 SV=1	B1N2L8 (+2)	EHI_022620	98 kDa	0	0	0	1.1485	1.6108	0
40S ribosomal protein S26 OS=Entamoeba histolytica HM-1:IMSS OX=294381 GN=EHI_105180 PE=3 SV=1	C4M123 (+2)	EHI_105180	16 kDa	0	0	3.6962	0.57425	0.40271	0
Transmembrane protein 144 OS=Entamoeba histolytica HM-1:IMSS OX=294381 GN=EHI_057700 PE=3 SV=1	C4M705 (+2)	EHI_057700	44 kDa	0	0	0	0.57425	1.2081	1.097
Non-specific serine/threonine protein kinase OS=Entamoeba histolytica HM-1:IMSS OX=294381 GN=EHI_151950 PE=3 SV=1	C4LSN4 (+2)	EHI_151950	39 kDa	0	0	0	1.7227	0.80541	1.097
Rho family GTPase OS=Entamoeba histolytica HM-1:IMSS OX=294381 GN=EHI_070730 PE=3 SV=1	C4M5T0	EHI_070730	22 kDa	0	0	0	0	0.40271	0
Nucleolar complex protein 2 homolog, putative OS=Entamoeba histolytica HM-1:IMSS OX=294381 GN=EHI_105790 PE=3 SV=1	C4M9H6 (+2)	EHI_105790	58 kDa	2.5073	0	0	1.1485	0.80541	1.4627
Villin, putative OS=Entamoeba histolytica HM-1:IMSS OX=294381 GN=EHI_007480 PE=4 SV=1	C4LYC0 (+2)	EHI_007480	77 kDa	0	0	0	1.1485	0.40271	1.097
Beta_helix domain-containing protein OS=Entamoeba histolytica HM-1:IMSS OX=294381 GN=EHI_103420 PE=4 SV=1	C4LVI6 (+1)	EHI_103420	48 kDa	0	0	0	0.57425	0	0
Saposin B-type domain-containing protein OS=Entamoeba histolytica HM-1:IMSS OX=294381 GN=EHI_048580 PE=4 SV=1	C4M2X1 (+1)	EHI_048580	105 kDa	0	0	0	0	0.40271	0
BRO1 domain-containing protein OS=Entamoeba histolytica HM-1:IMSS OX=294381 GN=EHI_165220 PE=4 SV=1	C4M203 (+2)	EHI_165220	103 kDa	0	0	0	0	0	0.36567
Ribosomal protein L23A, putative OS=Entamoeba histolytica HM-1:IMSS OX=294381 GN=EHI_182850 PE=3 SV=1	C4LV64 (+2)	EHI_182850	14 kDa	2.5073	0	3.6962	1.1485	0.80541	0.73134
Periplasmic heavy metal sensor OS=Entamoeba histolytica HM-1:IMSS OX=294381 GN=EHI_081630 PE=4 SV=1	C4M684 (+1)	EHI_081630	20 kDa	0	0	0	0	0.80541	0
F-actin-capping protein subunit beta OS=Entamoeba histolytica HM-1:IMSS OX=294381 GN=EHI_005020 PE=3 SV=1	C4M096 (+1)	EHI_005020	31 kDa	0	0	0	1.1485	0.80541	1.097
V-type proton ATPase subunit G OS=Entamoeba histolytica HM-1:IMSS OX=294381 GN=EHI_086230 PE=3 SV=1	C4M378 (+2)	EHI_086230	13 kDa	0	0	0	1.1485	0.80541	0.36567
p-glycoprotein 6, putative OS=Entamoeba histolytica HM-1:IMSS OX=294381 GN=EHI_050640 PE=4 SV=1	B1N2J5	EHI_050640	50 kDa	0	0	0	0.57425	0	0.36567
Protein tyrosine kinase domain-containing protein OS=Entamoeba histolytica HM-1:IMSS OX=294381 GN=EHI_064500 PE=4 SV=1	C4M0B9	EHI_064500	133 kDa	0	0	0	0	0	0
60S ribosomal protein L35a, putative OS=Entamoeba histolytica HM-1:IMSS OX=294381 GN=EHI_014110 PE=3 SV=1	B1N4V3 (+2)	EHI_014110	12 kDa	2.5073	3.5786	7.3924	0.57425	0.40271	0.36567
Pept_C1 domain-containing protein OS=Entamoeba histolytica HM-1:IMSS-B OX=885319 GN=EHI8A_021990 PE=3 SV=1	M3TBT6 (+1)	EHI8A_021990	63 kDa	0	0	0	0.57425	0.40271	0.73134
Ribosome biogenesis protein BOP1 homolog OS=Entamoeba histolytica HM-1:IMSS OX=294381 GN=EHI_163740 PE=3 SV=1	C4M3V4 (+1)	EHI_163740	68 kDa	5.0146	0	0	1.1485	1.2081	1.4627
Cysteine proteinase 2, putative OS=Entamoeba histolytica HM-1:IMSS-B OX=885319 GN=EHI8A_050360 PE=3 SV=1	M3S7G8	EHI8A_050360	35 kDa	0	0	0	1.1485	2.0135	0.73134
Calponin-homology (CH) domain-containing protein OS=Entamoeba histolytica HM-1:IMSS OX=294381 GN=EHI_156420 PE=4 SV=1	C4M4E1 (+2)	EHI_156420	46 kDa	0	0	0	0	0	0
I/LWEQ domain protein OS=Entamoeba histolytica HM-1:IMSS OX=294381 GN=EHI_003930 PE=4 SV=1	C4M9B6 (+2)	EHI_003930	115 kDa	0	0	0	0	0	0
G domain-containing protein OS=Entamoeba histolytica HM-1:IMSS OX=294381 GN=EHI_011270 PE=4 SV=1	C4M7D6	EHI_011270	93 kDa	0	0	0	0.57425	0.40271	1.4627
40S ribosomal protein S10, putative OS=Entamoeba histolytica HM-1:IMSS OX=294381 GN=EHI_197030 PE=3 SV=1	C4LVC0 (+2)	EHI_197030	15 kDa	0	0	0	0	0	0.36567
Rho family GTPase OS=Entamoeba histolytica HM-1:IMSS OX=294381 GN=EHI_129750 PE=3 SV=1	C4M5Q7 (+2)	EHI_129750	22 kDa	0	0	3.6962	0.57425	0.40271	0.73134
Nucleolar phosphoprotein Nopp34, putative OS=Entamoeba histolytica HM-1:IMSS OX=294381 GN=EHI_068680 PE=4 SV=1	C4LU58 (+2)	EHI_068680	18 kDa	0	0	0	1.7227	0.80541	0.73134
Uncharacterized protein OS=Entamoeba histolytica HM-1:IMSS OX=294381 GN=EHI_182860 PE=4 SV=1	C4LV65 (+2)	EHI_182860	47 kDa	0	0	0	0.57425	0	0
Rab family GTPase OS=Entamoeba histolytica HM-1:IMSS OX=294381 GN=EHI_161030 PE=3 SV=1	C4M2S0 (+2)	EHI_161030	24 kDa	0	0	0	1.1485	0.80541	1.097
Eukaryotic translation initiation factor 5B OS=Entamoeba histolytica HM-1:IMSS OX=294381 GN=EHI_039330 PE=4 SV=1	C4M8C5	EHI_039330	67 kDa	0	0	0	0	0.40271	0.36567
Nuclear pore protein, putative OS=Entamoeba histolytica HM-1:IMSS OX=294381 GN=EHI_179400 PE=4 SV=1	C4M9Y0 (+2)	EHI_179400	39 kDa	0	0	0	0.57425	0.40271	0.73134
SAC3/GANP family protein OS=Entamoeba histolytica HM-1:IMSS OX=294381 GN=EHI_199100 PE=4 SV=1	C4LWV5 (+2)	EHI_199100	57 kDa	0	0	0	1.1485	1.2081	1.097
Grainin, putative OS=Entamoeba histolytica HM-1:IMSS OX=294381 GN=EHI_120360 PE=4 SV=1	B1N4A1 (+2)	EHI_120360	25 kDa	0	0	0	0.57425	1.2081	0.73134
Copine, putative OS=Entamoeba histolytica HM-1:IMSS OX=294381 GN=EHI_140260 PE=4 SV=1	C4M474 (+2)	EHI_140260	31 kDa	0	0	0	0.57425	1.2081	2.194
Steroid 5-alpha reductase, putative OS=Entamoeba histolytica HM-1:IMSS OX=294381 GN=EHI_076870 PE=3 SV=1	C4M2S8 (+2)	EHI_076870	34 kDa	0	0	3.6962	0	0.80541	0.73134
Calmodulin, putative OS=Entamoeba histolytica HM-1:IMSS OX=294381 GN=EHI_000130 PE=4 SV=1	C4MB98	EHI_000130	17 kDa	0	0	3.6962	0.57425	0.80541	0.73134
NAD(FAD)-dependent dehydrogenase, putative OS=Entamoeba histolytica HM-1:IMSS OX=294381 GN=EHI_099700 PE=4 SV=1	C4M6H3	EHI_099700	116 kDa	2.5073	0	0	0.57425	0	0
HECT domain and RCC1-like domain-containing protein, putative (Fragment) OS=Entamoeba histolytica HM-1:IMSS OX=294381 GN=EHI_030610 PE=4 SV=1	B1N591 (+3)	EHI_030610	20 kDa	0	0	0	1.1485	1.2081	0.36567
Actin, putative OS=Entamoeba histolytica HM-1:IMSS OX=294381 GN=EHI_131230 PE=3 SV=1	C4LXI9 (+1)	EHI_131230	97 kDa	0	0	0	0.57425	0	0.36567
Adenosylhomocysteinase OS=Entamoeba histolytica HM-1:IMSS OX=294381 GN=EHI_068250 PE=3 SV=1	C4LU18 (+2)	EHI_068250	52 kDa	0	0	0	1.1485	0	1.4627
Calmodulin, putative OS=Entamoeba histolytica HM-1:IMSS OX=294381 GN=EHI_044820 PE=4 SV=1	C4LTA1 (+1)	EHI_044820	17 kDa	0	0	0	0	0	0
Uncharacterized protein OS=Entamoeba histolytica HM-1:IMSS OX=294381 GN=EHI_129500 PE=4 SV=1	B1N4P8 (+2)	EHI_129500	18 kDa	0	0	0	1.1485	0.40271	0.36567
Protein HIRA OS=Entamoeba histolytica HM-1:IMSS OX=294381 GN=EHI_056440 PE=3 SV=1	C4M6Z3 (+2)	EHI_056440	87 kDa	0	0	0	1.1485	0.40271	0.73134
Proliferating-cell nucleolar antigen p120, putative OS=Entamoeba histolytica HM-1:IMSS OX=294381 GN=EHI_198880 PE=3 SV=1	C4LWT4 (+2)	EHI_198880	55 kDa	0	0	0	1.7227	1.2081	1.4627
Helicase, putative OS=Entamoeba histolytica HM-1:IMSS OX=294381 GN=EHI_053080 PE=4 SV=1	C4M3C6 (+2)	EHI_053080	60 kDa	0	0	0	1.7227	0.80541	0.73134
Uncharacterized protein OS=Entamoeba histolytica HM-1:IMSS OX=294381 GN=EHI_113950 PE=4 SV=1	C4M8W1	EHI_113950	36 kDa	0	0	0	0	0	0.36567
40S ribosomal protein S19, putative OS=Entamoeba histolytica HM-1:IMSS OX=294381 GN=EHI_198740 PE=3 SV=1	C4LWS0 (+2)	EHI_198740	18 kDa	0	3.5786	0	0	0	0
Calreticulin OS=Entamoeba histolytica HM-1:IMSS OX=294381 GN=EHI_136160 PE=3 SV=1	C4M296 (+2)	EHI_136160	45 kDa	0	0	0	0	0.40271	0
Inorganic diphosphatase OS=Entamoeba histolytica HM-1:IMSS OX=294381 GN=EHI_124880 PE=3 SV=1	C4M982 (+2)	EHI_124880	28 kDa	0	0	0	0.57425	0.40271	0.36567
Histone H2B OS=Entamoeba histolytica HM-1:IMSS OX=294381 GN=EHI_182990 PE=3 SV=1	C4LV75	EHI_182990	15 kDa	0	0	0	1.1485	0.40271	1.097
Calmodulin, putative OS=Entamoeba histolytica HM-1:IMSS OX=294381 GN=EHI_100270 PE=1 SV=1	C4M0U8 (+2)	EHI_100270	17 kDa	0	0	0	0.57425	0.40271	0.73134
WD domain containing protein OS=Entamoeba histolytica HM-1:IMSS OX=294381 GN=EHI_035080 PE=4 SV=1	C4M4Z9 (+2)	EHI_035080	46 kDa	0	0	0	0.57425	2.0135	1.8284
Leucine-rich repeat containing protein OS=Entamoeba histolytica HM-1:IMSS OX=294381 GN=EHI_164460 PE=4 SV=1	B1N3D5 (+2)	EHI_164460	83 kDa	0	0	0	0	0	0
Rab family GTPase OS=Entamoeba histolytica HM-1:IMSS OX=294381 GN=EHI_059670 PE=3 SV=1	B1N3J0	EHI_059670	86 kDa	0	0	0	0	0	0.73134
Importin beta, putative OS=Entamoeba histolytica HM-1:IMSS OX=294381 GN=EHI_036520 PE=4 SV=1	C4M8F5 (+2)	EHI_036520	95 kDa	0	0	0	0.57425	1.6108	1.097
HEAT repeat-containing protein 1 OS=Entamoeba histolytica HM-1:IMSS OX=294381 GN=EHI_198890 PE=3 SV=1	C4LWT5 (+2)	EHI_198890	229 kDa	0	0	0	0	2.0135	1.4627
Cdc48-like protein, putative OS=Entamoeba histolytica HM-1:IMSS OX=294381 GN=EHI_176970 PE=4 SV=1	C4LY22 (+1)	EHI_176970	86 kDa	0	0	3.6962	1.1485	0.40271	0
Rhodanese domain-containing protein OS=Entamoeba histolytica HM-1:IMSS OX=294381 GN=EHI_031950 PE=4 SV=1	C4MAW5	EHI_031950	68 kDa	0	0	0	0.57425	0	0
Utp12 domain-containing protein OS=Entamoeba histolytica HM-1:IMSS OX=294381 GN=EHI_054840 PE=4 SV=1	C4M2K2 (+2)	EHI_054840	64 kDa	0	0	0	1.7227	0.80541	1.097
Histone deacetylase, putative OS=Entamoeba histolytica HM-1:IMSS OX=294381 GN=EHI_119320 PE=4 SV=1	A0A8U0WPW0 (+2)	EHI_119320	51 kDa	0	0	0	0.57425	0.40271	0.73134
Rho guanine nucleotide exchange factor, putative OS=Entamoeba histolytica HM-1:IMSS OX=294381 GN=EHI_011390 PE=4 SV=1	C4MAC2 (+2)	EHI_011390	73 kDa	0	0	0	0	0.80541	0.36567
Insulin-like growth factor 2 receptor OS=Entamoeba histolytica HM-1:IMSS OX=294381 GN=EHI_161650 PE=4 SV=1	C4MBF6 (+2)	EHI_161650	96 kDa	0	0	0	1.1485	0.80541	0
VASt domain-containing protein OS=Entamoeba histolytica HM-1:IMSS OX=294381 GN=EHI_024350 PE=4 SV=1	C4M0I0 (+2)	EHI_024350	69 kDa	0	0	0	0	0	0
Uncharacterized protein OS=Entamoeba histolytica HM-1:IMSS OX=294381 GN=EHI_197450 PE=4 SV=1	C4LVG1 (+2)	EHI_197450	28 kDa	0	0	0	0	0.40271	0.73134
Calmodulin, putative OS=Entamoeba histolytica HM-1:IMSS OX=294381 GN=EHI_117470 PE=4 SV=1	B1N2S2	EHI_117470	9 kDa	2.5073	0	3.6962	1.7227	0.40271	0.73134
Triosephosphate isomerase OS=Entamoeba histolytica HM-1:IMSS OX=294381 GN=EHI_056480 PE=3 SV=1	C4M6Z7 (+2)	EHI_056480	28 kDa	2.5073	0	3.6962	0	0.80541	0
Ribosomal protein L19 OS=Entamoeba histolytica HM-1:IMSS OX=294381 GN=EHI_110340 PE=3 SV=1	C4LU86 (+5)	EHI_110340	23 kDa	2.5073	7.1572	3.6962	0.57425	0	0.36567
4-alpha-glucanotransferase OS=Entamoeba histolytica HM-1:IMSS OX=294381 GN=EHI_084680 PE=3 SV=1	C4M1J9 (+2)	EHI_084680	97 kDa	0	0	0	0	0	0
Auxin efflux carrier family protein, putative OS=Entamoeba histolytica HM-1:IMSS OX=294381 GN=EHI_111850 PE=3 SV=1	C4M583 (+2)	EHI_111850	60 kDa	0	0	0	0	0	0.73134
Rab family GTPase OS=Entamoeba histolytica HM-1:IMSS OX=294381 GN=EHI_040310 PE=4 SV=1	A0A8U0WPB0 (+2)	EHI_040310	21 kDa	0	0	0	1.1485	0.80541	1.097
WD_REPEATS_REGION domain-containing protein OS=Entamoeba histolytica HM-1:IMSS OX=294381 GN=EHI_069460 PE=4 SV=1	C4LWN4 (+2)	EHI_069460	80 kDa	0	0	0	0.57425	1.2081	1.8284
WW domain-containing protein OS=Entamoeba histolytica HM-1:IMSS OX=294381 GN=EHI_068340 PE=4 SV=1	C4LU27 (+2)	EHI_068340	91 kDa	0	0	0	1.1485	0.40271	0
Uncharacterized protein OS=Entamoeba histolytica HM-1:IMSS-B OX=885319 GN=EHI8A_063990 PE=4 SV=1	M3UXH2 (+1)	EHI8A_063990	11 kDa	0	0	0	0	0	0.73134
Uncharacterized protein OS=Entamoeba histolytica HM-1:IMSS OX=294381 GN=EHI_183880 PE=4 SV=1	C4MAW1 (+2)	EHI_183880	28 kDa	0	0	0	0	0.40271	0.36567
Receptor mediated endocytosis protein, putative OS=Entamoeba histolytica HM-1:IMSS OX=294381 GN=EHI_105270 PE=4 SV=1	C4M131	EHI_105270	58 kDa	0	0	0	0	0	0
Grainin, putative OS=Entamoeba histolytica HM-1:IMSS OX=294381 GN=EHI_060380 PE=4 SV=1	C4M6J3 (+2)	EHI_060380	25 kDa	0	0	0	0	0	0.36567
Ribonucloprotein OS=Entamoeba histolytica HM-1:IMSS OX=294381 GN=EHI_104600 PE=3 SV=1	C4LZ69 (+4)	EHI_104600	14 kDa	0	0	0	1.7227	0.80541	1.097
Ribosome biogenesis regulatory protein OS=Entamoeba histolytica HM-1:IMSS OX=294381 GN=EHI_098810 PE=3 SV=1	C4M883 (+2)	EHI_098810	29 kDa	0	0	0	0	0.80541	0.73134
40S ribosomal protein S23, putative OS=Entamoeba histolytica HM-1:IMSS OX=294381 GN=EHI_020310 PE=3 SV=1	C4M5B7	EHI_020310	16 kDa	2.5073	3.5786	0	0	0	0.36567
Ribosomal protein L15 (Fragment) OS=Entamoeba histolytica HM-1:IMSS-B OX=885319 GN=EHI8A_170770 PE=3 SV=1	M3UM91 (+1)	EHI8A_170770	22 kDa	0	0	0	0	0.40271	0.36567
40S ribosomal protein S25 OS=Entamoeba histolytica HM-1:IMSS OX=294381 GN=EHI_074800 PE=3 SV=1	C4M9F4	EHI_074800	15 kDa	2.5073	3.5786	0	0	0	0
F-box domain-containing protein OS=Entamoeba histolytica HM-1:IMSS OX=294381 GN=EHI_165310 PE=4 SV=1	C4M209 (+2)	EHI_165310	74 kDa	0	0	0	0.57425	1.2081	0.73134
NUC153 domain-containing protein OS=Entamoeba histolytica HM-1:IMSS OX=294381 GN=EHI_097980 PE=3 SV=1	B1N3N6 (+2)	EHI_097980	67 kDa	0	0	0	0	0.80541	1.8284
Superoxide dismutase OS=Entamoeba histolytica HM-1:IMSS OX=294381 GN=EHI_159160 PE=3 SV=1	C4LX20	EHI_159160	22 kDa	0	3.5786	0	0	0.40271	0
Guanine nucleotide-binding protein subunit beta 2-like 1, putative OS=Entamoeba histolytica HM-1:IMSS OX=294381 GN=EHI_110400 PE=3 SV=1	C4LU92	EHI_110400	35 kDa	2.5073	0	0	0	0	0
Histone deacetylase HDT1-like OS=Entamoeba histolytica HM-1:IMSS OX=294381 GN=EHI_125630 PE=4 SV=1	C4LVV1 (+2)	EHI_125630	17 kDa	0	0	0	1.1485	0.40271	0.36567
Ras family GTPase OS=Entamoeba histolytica HM-1:IMSS OX=294381 GN=EHI_198330 PE=3 SV=1	C4MA96 (+2)	EHI_198330	23 kDa	0	0	0	1.1485	1.6108	1.4627
Venom polypeptide OS=Entamoeba histolytica HM-1:IMSS OX=294381 GN=EHI_188850 PE=4 SV=1	C4M2V2 (+2)	EHI_188850	26 kDa	0	0	0	0.57425	0	1.097
Protein BIG1 OS=Entamoeba histolytica HM-1:IMSS OX=294381 GN=EHI_044360 PE=4 SV=1	C4M783 (+2)	EHI_044360	30 kDa	0	0	0	0	0	0
Syntaxin, putative OS=Entamoeba histolytica HM-1:IMSS OX=294381 GN=EHI_139030 PE=4 SV=1	A0A8U0WNX3 (+2)	EHI_139030	35 kDa	0	0	0	1.1485	0.80541	0.73134
Uncharacterized protein OS=Entamoeba histolytica HM-1:IMSS OX=294381 GN=EHI_104580 PE=4 SV=1	C4LZ67 (+2)	EHI_104580	29 kDa	0	0	0	0.57425	0.40271	1.4627
Uncharacterized protein OS=Entamoeba histolytica HM-1:IMSS OX=294381 GN=EHI_194870 PE=4 SV=1	C4M402	EHI_194870	71 kDa	0	0	0	0.57425	0.80541	0.36567
Uncharacterized protein OS=Entamoeba histolytica HM-1:IMSS OX=294381 GN=EHI_035190 PE=4 SV=1	B1N3R8 (+2)	EHI_035190	14 kDa	0	0	0	0.57425	0.40271	0.36567
ATP-binding cassette protein, putative OS=Entamoeba histolytica HM-1:IMSS OX=294381 GN=EHI_178580 PE=4 SV=1	B1N2M5	EHI_178580	154 kDa	0	0	0	0	0	0.36567
Ras GTPase activating protein, putative OS=Entamoeba histolytica HM-1:IMSS OX=294381 GN=EHI_035800 PE=4 SV=1	C4LY07 (+2)	EHI_035800	90 kDa	0	0	0	0.57425	0.80541	0.73134
Utp12 domain-containing protein OS=Entamoeba histolytica HM-1:IMSS OX=294381 GN=EHI_054170 PE=4 SV=1	C4M6U2 (+2)	EHI_054170	64 kDa	0	0	0	0	1.2081	0.73134
WD_REPEATS_REGION domain-containing protein OS=Entamoeba histolytica HM-1:IMSS OX=294381 GN=EHI_017010 PE=4 SV=1	C4MAK3 (+2)	EHI_017010	52 kDa	0	0	0	1.1485	1.2081	1.097
AAA domain-containing protein OS=Entamoeba histolytica HM-1:IMSS-B OX=885319 GN=EHI8A_039970 PE=4 SV=1	M3UZW6	EHI8A_039970	60 kDa	0	0	0	0.57425	1.6108	1.8284
TSNAXIP1_N domain-containing protein OS=Entamoeba histolytica HM-1:IMSS OX=294381 GN=EHI_193460 PE=4 SV=1	C4M4V0 (+2)	EHI_193460	58 kDa	0	0	0	0.57425	1.2081	0.73134
Rab family GTPase OS=Entamoeba histolytica HM-1:IMSS OX=294381 GN=EHI_177520 PE=4 SV=1	A0A8U0WPU0	EHI_177520	23 kDa	0	0	0	0	0	0.36567
Alpha-NAC protein, putative OS=Entamoeba histolytica HM-1:IMSS OX=294381 GN=EHI_083250 PE=4 SV=1	C4M758	EHI_083250	24 kDa	0	3.5786	0	0	0	0.73134
Gelsolin repeat protein, putative OS=Entamoeba histolytica HM-1:IMSS OX=294381 GN=EHI_009570 PE=4 SV=1	C4LZ32 (+2)	EHI_009570	169 kDa	0	0	0	0	0	0
Uncharacterized protein OS=Entamoeba histolytica HM-1:IMSS OX=294381 GN=EHI_109990 PE=4 SV=1	C4M3L7 (+2)	EHI_109990	27 kDa	0	0	0	0	0.40271	0.36567
26S protease regulatory subunit 7, putative OS=Entamoeba histolytica HM-1:IMSS OX=294381 GN=EHI_080890 PE=3 SV=1	B1N4Q6 (+2)	EHI_080890	47 kDa	0	0	0	1.7227	1.6108	1.097
C2 domain containing protein OS=Entamoeba histolytica HM-1:IMSS OX=294381 GN=EHI_118130 PE=3 SV=1	C4LYZ7 (+2)	EHI_118130	42 kDa	0	0	0	0	1.6108	1.097
Leucine-rich repeat containing protein OS=Entamoeba histolytica HM-1:IMSS OX=294381 GN=EHI_119950 PE=4 SV=1	C4M989 (+2)	EHI_119950	41 kDa	0	0	0	1.1485	0.80541	1.097
Periplasmic protein OS=Entamoeba histolytica HM-1:IMSS OX=294381 GN=EHI_022970 PE=4 SV=1	C4LUL0 (+2)	EHI_022970	20 kDa	0	0	0	0.57425	0	0.36567
Leucine-rich repeat containing protein OS=Entamoeba histolytica HM-1:IMSS OX=294381 GN=EHI_024640 PE=4 SV=1	C4M0K6 (+2)	EHI_024640	56 kDa	0	0	0	0.57425	0	0
DnaJ family protein OS=Entamoeba histolytica HM-1:IMSS OX=294381 GN=EHI_022950 PE=3 SV=1	C4LUK8 (+2)	EHI_022950	41 kDa	0	0	0	1.1485	0.40271	0.36567
Reverse transcriptase domain-containing protein OS=Entamoeba histolytica HM-1:IMSS OX=294381 GN=EHI_109000 PE=3 SV=1	C4M7E0	EHI_109000	66 kDa	0	0	0	0.57425	1.2081	0.73134
Putative rRNA methyltransferase OS=Entamoeba histolytica HM-1:IMSS OX=294381 GN=EHI_088070 PE=3 SV=1	C4M6R5 (+2)	EHI_088070	96 kDa	0	0	0	0	0.80541	1.4627
Actophorin, putative OS=Entamoeba histolytica HM-1:IMSS OX=294381 GN=EHI_197480 PE=3 SV=1	C4LVG4 (+2)	EHI_197480	16 kDa	2.5073	0	7.3924	1.1485	0	0
NAC-A/B domain-containing protein OS=Entamoeba histolytica HM-1:IMSS OX=294381 GN=EHI_048560 PE=4 SV=1	C4M2W9 (+2)	EHI_048560	19 kDa	0	0	0	0.57425	0	0.73134
60S ribosomal protein L10a, putative OS=Entamoeba histolytica HM-1:IMSS OX=294381 GN=EHI_012480 PE=3 SV=1	B1N2I7	EHI_012480	24 kDa	0	0	0	0	0	0
Eukaryotic translation initiation factor 6 OS=Entamoeba histolytica HM-1:IMSS OX=294381 GN=EIF6 PE=3 SV=1	C4M2Q1 (+2)	EIF6	26 kDa	0	0	0	1.1485	0	1.4627
Axoneme-associated protein mst101 OS=Entamoeba histolytica HM-1:IMSS OX=294381 GN=EHI_049670 PE=4 SV=1	C4LUG8 (+2)	EHI_049670	94 kDa	0	0	0	0	0.40271	0
MIB/HERC2 domain-containing protein OS=Entamoeba histolytica HM-1:IMSS OX=294381 GN=EHI_181140 PE=4 SV=1	C4M602 (+2)	EHI_181140	25 kDa	0	0	0	0.57425	0	0.36567
DNA double-strand break repair Rad50 ATPase OS=Entamoeba histolytica HM-1:IMSS OX=294381 GN=EHI_008630 PE=4 SV=1	C4M0M7 (+2)	EHI_008630	69 kDa	0	0	0	0	0	0
[truncated: 647 more rows]

## Sheet: Trial 4
Table S3. E. histolytica HA-KERP2 co-IP proteome
[truncated: 1,082 more rows]
