# Supplementary material for: Dual Role of Entamoeba histolytica KERP2 in Regulating Gene Expression and Modulating Host Cell Function for Intestinal Colonization
Source: Research Square preprint supplement (doi:10.21203/rs.3.rs-6191032/v1), 2025-04-28
Supplement: Supplementary file 5 [file e0f692e06fd3d04a8481f37b.xlsx]

## Sheet: Sheet1
Table S5. RNA-seq of Caco-2 under different conditions
Gene.name	G3_1	G3_2	G3_3	HAKERP2_1	HAKERP2_2	HAKERP2_3	KERP2gs_1	KERP2gs_2	KERP2gs_3	Wild-type_1	Wild-type_2	Wild-type_3
DDX11L1	3.82447	0	2.20734	0	0	1.07468	0	0	2.0677	0	0	1.69158
WASH7P	504.83	559.699	533.073	502.149	451.094	511.548	552.425	473.188	524.162	587.289	545.374	612.352
MIR6859-1	1.91223	0	0	0	0	1.07468	0	2.16562	0	1.68761	0	0
rna-NR_106918.1	0	0	0	0	0	0	0	0	0	0	0	0
MIR1302-2HG	0.956117	0	4.41468	0	0	0	0	0	2.0677	0	2.5327	0
MIR1302-2	0	0	0	0	0	0	0	0	0	0	0	0
rna-NR_036051.1	0	0	0	0	0	0	0	0	0	0	0	0
FAM138A	0	0	0	0	0	0	0	0	0	0	0	0
OR4F5	0	0	0	0	0	0	0	0	0	0	0	0
LOC124903816	0	0	0	0	0	0	0	0	0	0	0	0
LOC124900384	5.7367	15.2819	11.0367	4.2465	6.3834	9.67212	2.1835	5.41405	1.03385	8.43806	10.1308	2.53737
SEPTIN14P18	3.82447	1.91024	4.41468	1.06163	4.2556	2.14936	17.468	4.33124	2.0677	5.06283	3.37693	10.1495
LOC729737	0	3.82047	3.31101	2.12325	4.2556	2.14936	0	1.08281	1.03385	0	1.68846	1.69158
LOC124903814	0	0	0	0	0	0	0	0	0	0	0.844232	0
DDX11L17	4.78058	19.1024	16.5551	7.43138	22.3419	20.4189	4.36699	14.0765	21.7108	23.6266	8.44232	20.299
WASH9P	537.338	688.64	548.524	635.914	539.397	568.506	614.654	537.074	583.091	598.258	511.605	617.427
MIR6859-2	0	0	0	0	0	0	0	0	0	0	0	0
rna-NR_107062.1	0	0	0	0	0	0	0	0	0	0	0	0
RPL23AP21	3.82447	2.86536	2.20734	5.30813	1.0639	2.14936	1.09175	0	2.0677	2.53142	2.5327	0
LOC127239154	2.86835	7.64095	3.31101	5.30813	3.1917	9.67212	2.1835	6.49686	0	4.21903	5.90962	4.22895
LOC124903815	0	0	0	0	0	0	0	0	0	0	0	0
RPL23AP24	1.91223	1.91024	3.31101	4.2465	3.1917	1.07468	0	0	0	1.68761	2.5327	0
LOC124900618	0	1.91024	2.20734	0	0	0	0	0	0	0	0	3.38316
LOC112268260	0	0	0	0	0	0	0	0	0	0	0	0
WBP1LP7	0	0	0	0	0	0	0	0	0	0	0	0
OR4F29	0	0	0	0	0	0	0	0	0	0	0	0
SEPTIN14P13	0	1.91024	0	0	0	1.07468	0	0	0	0.843806	0	0
LOC100132287	0	0	0	0	0	0	0	0	0	0	3.37693	0
LOC124904706	0	0	0	0	0	0	0	0	0	0	0	0
LOC105378947	0	0	0	0	0	0	0	0	0	0	5.06539	0
LOC101928626	0	0	0	0	0	0	0	0	0	0	0	0
MIR12136	7.64893	7.64095	38.6285	2.12325	10.639	2.14936	10.9175	11.9109	14.4739	3.37522	4.22116	0
rna-NR_162149.1	0	0	0	0	0	0	0	0	0	0	0	0
WBP1LP6	0	0	0	0	0	0	0	0	0	0	0	0
OR4F16	0	1.91024	1.10367	2.12325	0	0	0	0	0	7.59425	1.68846	2.53737
SEPTIN14P14	10.5173	0	4.41468	12.7395	3.1917	3.22404	2.1835	4.33124	4.1354	8.43806	5.90962	11.8411
LOC100288069	258.151	284.625	375.248	260.098	234.058	281.566	268.57	307.518	186.093	314.739	274.375	268.115
LINC01409	11.4734	26.7433	11.0367	19.1093	8.5112	27.9417	9.82573	16.2422	16.5416	21.0951	17.7289	24.5279
LOC124903817	3.82447	10.5063	11.0367	12.7395	11.7029	8.59744	21.835	12.9937	12.4062	16.0323	20.2616	15.2242
FAM87B	9.56117	4.77559	11.0367	8.49301	3.1917	4.29872	1.09175	10.8281	4.1354	7.59425	12.6635	7.61211
LINC00115	44.9375	28.6536	51.8725	24.4174	19.1502	41.9125	14.1927	36.8156	16.5416	35.4398	32.9251	18.6074
LINC01128	419.735	393.509	409.462	485.163	443.646	405.154	446.525	458.029	447.657	482.657	377.372	409.362
LOC107984850	0	0	0	0	0	0	4.36699	0	0	0	0	0
FAM41C	0	0	0	0	0	0	0	1.08281	0	0	0	0
TUBB8P11	0	0	0	0	0	0	4.36699	0	0	0	0	0
LOC284600	6.69282	21.0126	13.244	9.55463	28.7253	20.4189	24.0185	27.0703	21.7108	16.8761	27.0154	24.5279
LINC02593	3.82447	3.82047	0	0	0	0	0	0	1.03385	3.37522	0	0
LOC107985728	9.56117	2.86536	6.62202	9.55463	8.5112	6.44808	9.82573	4.33124	0	2.53142	2.5327	5.07474
SAMD11	23.9029	24.8331	29.7991	24.4174	20.2141	62.3315	36.0277	30.3187	41.354	35.4398	17.7289	28.7569
NOC2L	5005.27	4795.65	3932.38	5060.77	4658.82	4309.47	5123.57	4547.8	5213.7	5374.2	5315.29	5056.13
KLHL17	798.357	915.004	885.144	875.841	671.321	790.965	927.986	905.23	741.27	760.269	655.968	791.66
PLEKHN1	300.221	361.99	357.589	321.673	301.084	285.865	357.002	286.945	280.173	201.67	151.962	186.92
PERM1	9.56117	23.878	29.7991	16.986	19.1502	37.6138	15.2845	24.9046	12.4062	5.90664	6.75386	6.76632
HES4	5020.57	4869.19	5792.06	5526.82	4851.39	5433.58	5165.06	5941.38	5889.84	2290.93	2698.17	2506.08
RPL39P12	1.91223	12.4165	8.82936	5.30813	7.4473	12.8962	4.36699	12.9937	9.30465	4.21903	6.75386	4.22895
ISG15	1357.69	1335.26	1828.78	1319.6	1272.42	1181.07	1164.9	1297.21	1528.03	686.014	686.361	748.524
AGRN	18929.2	19332.6	18933.5	22429	20313	21667.7	23651.6	24390.3	25477.2	22762.5	21829.3	21445
LOC100288175	285.879	219.677	337.723	212.325	204.269	269.745	238.001	255.543	263.632	87.7558	78.5136	76.9669
LOC105378948	40.1569	15.2819	40.8358	23.3558	18.0863	24.7176	24.0185	25.9875	21.7108	18.5637	9.28655	8.4579
RNF223	59.2792	78.3197	92.7083	77.4987	40.4282	45.1366	49.1287	83.3764	65.1325	18.5637	13.5077	24.5279
C1orf159	286.835	331.426	269.296	322.734	232.994	266.521	284.946	276.117	330.832	267.486	314.899	280.802
LOC124903819	49.7181	58.2622	46.3542	42.465	58.5145	53.734	51.3122	44.3952	33.0832	75.0987	79.3578	77.8127
LOC124903820	21.0346	14.3268	26.4881	15.9244	17.0224	20.4189	8.73399	34.6499	28.9478	14.3447	11.8192	14.3784
LINC01342	1.91223	1.91024	7.72569	0	0	0	4.36699	2.16562	0	0.843806	0.844232	0
LOC124903818	751.508	859.607	1036.35	830.191	698.983	731.857	756.582	751.471	622.378	518.94	416.206	516.778
MIR200B	0	0	0	0	0	0	0	0	0	0	0	0
rna-NR_029639.1	0	0	0	0	0	0	0	0	0	0	0	0
MIR200A	0	0	0	0	0	0	0	0	0	0	0	0
rna-NR_029834.1	0	0	0	0	0	0	0	0	0	0	0	0
MIR429	0	0	0	0	0	0	0	0	0	0	0	0
rna-NR_029957.1	0	0	0	0	0	0	0	0	0	0	0	0
TTLL10-AS1	10.5173	15.2819	24.2807	5.30813	4.2556	10.7468	6.55049	6.49686	10.3385	1.68761	5.06539	1.69158
TTLL10	15.2979	3.82047	19.8661	12.7395	17.0224	4.29872	6.55049	10.8281	9.30465	16.8761	10.1308	11.8411
TNFRSF18	31.5518	38.2047	26.4881	26.5406	20.2141	37.6138	39.3029	38.9812	24.8124	10.1257	20.2616	10.9953
TNFRSF4	9.56117	1.91024	5.51835	6.36975	3.1917	4.29872	1.09175	2.16562	2.0677	6.75044	1.68846	3.38316
SDF4	5684.11	5293.27	4621.07	5485.42	5405.68	4981.14	5137.77	4924.62	5522.83	5485.58	5402.24	4950.41
B3GALT6	2943.88	2869.18	2379.51	2947.07	2705.5	2801.69	2859.29	2805.56	3541.97	3131.36	3158.27	2972.11
C1QTNF12	47.8058	40.115	24.2807	42.465	24.4697	36.5391	29.4772	43.3124	34.117	32.9084	43.0558	41.4437
UBE2J2	1546.04	1749.78	1375.17	1683.74	1554.36	1503.48	1793.74	1706.51	2019.11	1836.12	1843.8	1812.53
LINC01786	41.113	47.7559	69.5312	55.2045	44.6838	39.7632	50.2204	54.1405	41.354	64.973	50.6539	49.0558
SCNN1D	82.226	80.23	100.434	98.7312	77.6647	87.0491	76.4224	63.8858	88.9111	62.4416	81.8905	85.4248
ACAP3	1371.07	1323.79	1352	1302.61	1063.9	1149.91	1279.53	1424.98	1425.68	1503.66	1242.71	1344.81
MIR6726	0	0	0	0	0	0	0	0	0	0	0	0
rna-NR_106784.1	0	0	0	0	0	0	0	0	0	0	0	0
SNORD167	1.91223	4.77559	0	5.30813	1.0639	3.22404	2.1835	3.24843	1.03385	1.68761	3.37693	0.84579
PUSL1	740.99	777.467	668.824	693.242	590.465	711.438	742.389	812.108	836.385	777.989	755.588	635.188
INTS11	2938.15	3053.51	2783.46	2934.33	2795.93	2660.91	3122.4	3060.02	3135.67	2931.38	3200.48	2905.29
MIR6727	0	0	0	0	0	0	0	0	0	0	0	0
rna-NR_106785.1	0	0	0	0	0	0	0	0	0	0	0	0
CPTP	459.892	536.777	462.438	486.225	520.247	465.337	427.965	527.329	589.294	447.217	471.926	460.956
TAS1R3	129.076	125.121	128.026	154.997	111.71	109.617	137.56	121.275	142.671	116.445	54.8751	80.3501
DVL1	3556.75	3740.24	3132.22	3357.92	3111.91	3419.63	3494.69	3219.2	3759.08	3119.55	2978.45	2946.73
MIR6808	0	0	0	0	0	0	0	0	0	0	0	0
rna-NR_106866.1	0	0	0	0	0	0	0	0	0	0	0	0
MXRA8	453.199	454.636	496.652	400.233	392.579	427.723	444.342	387.646	437.318	549.317	483.745	496.479
AURKAIP1	2000.2	2226.38	1813.33	2003.29	1830.97	1930.13	2087.42	2097.4	2686.98	2144.95	2092.01	1966.46
CCNL2	4480.36	4690.59	5302.03	4799.61	4591.79	4854.33	5287.34	5293.86	4401.1	4574.27	4117.32	4467.46
MRPL20-AS1	557.416	519.585	461.334	540.367	513.864	530.892	592.819	569.558	637.885	738.33	718.441	793.351
MRPL20	1838.61	1676.23	1427.05	1549.97	1727.77	1567.96	1519.71	1638.29	1851.63	1948.35	2016.87	1719.49
MRPL20-DT	81.2699	83.0953	114.782	48.8348	91.4954	68.7795	66.5966	96.3702	82.708	80.1615	113.971	121.794
ANKRD65	3.82447	0	4.41468	12.7395	3.1917	1.07468	2.1835	12.9937	8.2708	5.06283	0	5.07474
ANKRD65-AS1	0	0	0	4.2465	0	0	0	2.16562	0	0	0	1.69158
TMEM88B	20.0784	17.1921	8.82936	11.6779	19.1502	25.7923	15.2845	5.41405	12.4062	17.7199	7.59809	3.38316
LINC01770	17.2101	14.3268	7.72569	5.30813	11.7029	2.14936	4.36699	15.1593	14.4739	16.0323	4.22116	12.6869
LOC107985729	5.7367	14.3268	6.62202	9.55463	8.5112	18.2696	26.202	14.0765	23.7785	30.377	20.2616	20.299
VWA1	4642.9	4518.67	4121.11	4175.37	4084.31	3818.34	4214.15	4102.77	5104.12	4019.05	4411.96	3966.76
ATAD3C	3.82447	17.1921	15.4514	10.6163	11.7029	17.1949	6.55049	8.66249	31.0155	14.3447	15.1962	16.07
ATAD3B	3436.28	3511.02	3180.78	3292.1	3066.16	3327.21	3753.43	3631.75	4004.1	3079.05	3146.45	3041.46
ATAD3A	2785.17	2702.99	2135.6	2462.97	2488.46	2380.42	2627.84	2620.4	2918.56	3081.58	2926.95	2928.13
TMEM240	9.56117	9.55119	2.20734	4.2465	18.0863	4.29872	13.101	7.57967	16.5416	1.68761	1.68846	11.8411
SSU72	1359.6	1550.16	1174.31	1428.95	1328.81	1398.16	1391.98	1444.47	1564.21	1615.04	1784.71	1552.87
FNDC10	270.581	225.408	225.149	203.832	205.333	261.147	159.395	192.74	286.376	354.398	364.708	410.208
LOC105378586	2.86835	8.59607	2.20734	3.18488	2.1278	1.07468	1.09175	2.16562	5.16925	14.3447	6.75386	5.92053
MIB2	325.08	294.177	306.82	362.014	321.298	329.927	347.176	332.423	314.29	313.896	298.858	327.321
LOC124903821	37.2885	59.2174	46.3542	39.2802	29.7892	37.6138	43.6699	33.5671	52.7263	47.2531	37.9904	57.5137
MMP23B	32.508	30.5638	27.5918	13.8011	10.639	16.1202	15.2845	17.325	17.5754	32.9084	24.4827	25.3737
CDK11B	471.366	545.373	513.207	463.93	440.455	519.071	596.095	670.26	523.128	554.38	587.586	485.484
SLC35E2B	923.609	871.068	1022	785.603	857.504	908.105	847.197	842.427	877.739	1312.96	1094.97	1166.34
LOC100288379	11.4734	21.9677	32.0064	31.8488	13.8307	13.9708	18.5597	35.7328	10.3385	8.43806	16.8846	19.4532
MMP23A	7.64893	7.64095	8.82936	20.1709	4.2556	4.29872	16.3762	6.49686	6.2031	11.8133	15.1962	11.8411
CDK11A	435.033	377.272	483.408	439.513	385.132	377.213	399.58	445.035	396.998	427.809	390.035	354.386
SLC35E2A	1433.22	1352.45	1456.84	1303.68	1287.32	1326.16	1312.28	1186.76	1259.23	1830.21	1721.39	1727.1
LOC100129381	31.5518	68.7685	68.4276	40.3418	45.7477	31.1657	45.8534	50.8921	42.3878	45.5655	40.5231	61.7427
LOC112268218	0	1.91024	4.41468	0	0	0	2.1835	0	8.2708	1.68761	0	1.69158
NADK	3806.3	3956.1	3541.68	4017.19	3639.6	3731.29	3532.9	3573.28	4068.2	4354.04	4463.45	4340.6
GNB1	12156.1	12242.7	11289.4	12447.6	12809.4	12961.7	13225.4	13567.6	13875.3	12520.4	12755.5	11617.8
GNB1-DT	32.508	30.5638	27.5918	23.3558	20.2141	13.9708	12.0092	27.0703	23.7785	16.8761	21.1058	16.07
LOC124903822	9.56117	16.237	9.93303	12.7395	8.5112	8.59744	3.27524	15.1593	3.10155	6.75044	8.44232	12.6869
CALML6	5.7367	4.77559	19.8661	10.6163	3.1917	12.8962	5.45874	9.7453	9.30465	5.90664	3.37693	3.38316
TMEM52	171.145	140.402	193.142	219.757	153.202	169.799	156.12	214.397	186.093	144.291	151.962	145.476
CFAP74	4.78058	5.73071	9.93303	4.2465	2.1278	6.44808	2.1835	0	4.1354	1.68761	5.06539	3.38316
LOC107984872	0.956117	0	0	0	0	0	2.1835	0	0	0	0	3.38316
LOC105378589	0	0	0	4.2465	0	0	0	0	4.1354	0	0	0
GABRD	13.3856	3.82047	8.82936	12.7395	6.3834	17.1949	6.55049	0	4.1354	14.3447	12.6635	3.38316
LOC105378590	6.69282	6.68583	13.244	30.7871	8.5112	13.9708	16.3762	4.33124	5.16925	5.06283	4.22116	5.07474
PRKCZ	2186.64	2226.38	2063.86	2447.05	2089.5	2146.14	2278.48	1958.8	2211.4	1991.38	2081.03	1907.26
PRKCZ-DT	7.64893	3.82047	3.31101	2.12325	0	3.22404	5.45874	14.0765	7.23695	10.1257	2.5327	5.07474
PRKCZ-AS1	31.5518	37.2496	51.8725	27.6023	43.6199	25.7923	29.4772	20.5734	34.117	32.9084	16.8846	22.8363
FAAP20	369.061	369.631	411.669	311.056	245.761	325.628	292.589	345.417	379.423	323.178	326.718	336.624
LOC112268219	179.75	160.46	241.704	151.812	139.371	155.829	182.322	131.02	167.484	155.26	165.469	173.387
LOC105378593	7.64893	1.91024	6.62202	0	1.0639	2.14936	2.1835	2.16562	6.2031	16.0323	0	11.8411
LOC124903823	0	0	0	0	0	0	0	0	0	0	0	0
SKI	2904.68	2851.03	3548.3	2801.63	2579.96	2815.66	2852.74	2996.14	3114.99	2333.12	2268.45	2072.19
LOC124903824	49.7181	49.6662	52.9762	29.7255	50.0033	29.0164	25.1102	41.1468	28.9478	52.3159	23.6385	43.1353
MORN1	146.286	144.223	124.715	123.149	122.349	95.6465	96.0739	112.612	156.111	150.197	135.921	153.934
LOC100129534	24.859	22.9228	13.244	18.0476	26.5975	20.4189	27.2937	10.8281	26.8801	11.8133	23.6385	42.2895
RER1	3582.57	3712.55	2845.26	3039.43	3237.45	3281	3067.81	3107.67	3773.55	3503.48	3879.25	3713.86
PEX10	1001.05	915.959	847.619	879.026	948.999	913.478	907.243	822.936	1013.17	1212.55	1155.75	1106.29
PLCH2	2.86835	8.59607	3.31101	12.7395	8.5112	10.7468	7.64224	0	3.10155	9.28186	4.22116	4.22895
PANK4	0	0	0	0	0	0	0	0	0	0	0	0
HES5	0	0	0	0	0	0	0	0	0	0	0	0
TNFRSF14-AS1	0	0	0	0	0	0	0	0	0	0	0	0
TNFRSF14	0	0	0	0	0	0	0	0	0	0	0	0
LOC100996583	0	0	0	0	0	0	0	0	0	0	0	0
PRXL2B	0	0	0	0	2.1278	0	0	0	0	0	0	0
MMEL1	0	0	0	0	0	0	0	0	0	0	0	0
MMEL1-AS1	0	0	0	0	0	0	0	0	0	0	0	0
TTC34	0	0	0	0	2.1278	0	0	0	0	0	0	0
LOC105378602	0	0	0	0	0	0	0	0	0	0	0	0
LOC105378601	0	0	0	0	0	0	0	0	0	0	0	0
LOC112268220	0	0	0	0	0	0	0	0	0	0	0	0
LOC107985732	0	0	0	0	0	0	0	0	0	0	0	0
LOC105378600	0	0	0	0	0	0	0	0	0	0	0	0
LOC105378598	0	0	0	0	0	0	0	0	0	0	0	0
LOC107984904	0	0	0	0	0	0	0	0	0	0	0	0
LOC105378599	0	0	0	0	0	0	0	0	0	0	0	0
LOC124903825	0	0	0	0	0	0	0	0	2.0677	0	0	0
LOC124903826	0	0	0	0	0	4.29872	2.1835	2.16562	0	0	0	0
ACTRT2	0	0	0	0	0	0	0	0	0	0	0	0
LOC124903827	210.346	218.722	279.229	210.202	205.333	204.189	231.451	205.734	204.702	96.1938	93.7098	132.789
PRDM16-DT	0	0	0	0	0	0	0	0	0	0	0	0
PRDM16	109.953	85.9607	130.233	107.224	75.5369	104.244	124.459	79.0452	126.13	97.0376	82.7347	87.1164
MIR4251	0	0	0	0	0	0	1.09175	0	0	0	0	0
rna-NR_036215.1	0	0	0	0	0	0	0	0	0	0	0	0
LOC105378606	1.91223	0	5.51835	1.06163	2.1278	4.29872	2.1835	3.24843	6.2031	0	2.5327	0
LOC107984909	55.4548	61.1276	96.0193	78.5603	40.4282	70.9289	76.4224	69.2999	43.4217	20.2513	15.1962	11.8411
LOC105378605	0	0	7.72569	9.55463	1.0639	2.14936	4.36699	4.33124	6.2031	4.21903	0	0.84579
LOC124903828	123.339	124.165	185.417	108.286	80.8564	98.8706	146.294	175.415	126.13	59.0664	43.9001	59.2053
LOC105378604	39.2008	34.3843	40.8358	33.972	31.917	42.9872	43.6699	44.3952	13.44	16.8761	11.8192	21.9905
ARHGEF16	4491.84	4516.76	4320.87	4449.27	4088.57	3939.78	4309.13	4474.17	4609.94	3760.84	3547.46	3410.23
MEGF6	1597.67	1708.71	1615.77	1507.51	1329.88	1567.96	1854.88	1615.55	1780.29	1921.35	1574.49	1899.64
LOC105378608	21.0346	25.7882	15.4514	20.1709	7.4473	13.9708	12.0092	15.1593	14.4739	9.28186	2.5327	0.84579
MIR551A	0	0	0	0	0	0	0	0	1.03385	0	0	0
rna-NR_030277.1	0	0	0	0	0	0	0	0	0	0	0	0
TPRG1L	3918.17	3937.95	3052.75	3791.07	3821.53	3690.45	3781.82	3799.58	4068.2	3959.98	3822.68	3795.06
WRAP73	771.586	736.396	706.349	721.905	698.983	691.019	740.205	752.553	757.812	912.998	778.382	818.725
TP73	417.823	515.764	449.194	440.575	469.18	395.482	460.718	400.64	531.399	568.725	508.228	477.871
TP73-AS3	4.78058	5.73071	6.62202	7.43138	7.4473	4.29872	8.73399	16.2422	6.2031	6.75044	2.5327	8.4579
TP73-AS2	4.78058	3.82047	1.10367	5.30813	1.0639	1.07468	5.45874	5.41405	8.2708	8.43806	1.68846	5.07474
GFOD3P	2.86835	1.91024	2.20734	5.30813	0	2.14936	2.1835	0	0	0	1.68846	0
CCDC27	5.7367	3.82047	11.0367	1.06163	5.3195	4.29872	7.64224	6.49686	6.2031	10.1257	6.75386	10.1495
SMIM1	171.145	125.121	133.544	192.154	152.138	123.588	121.184	134.269	170.585	115.601	127.479	134.481
LRRC47	3519.47	3662.88	3277.9	3480.01	3367.24	3423.93	3505.6	3317.73	3596.76	4273.03	4238.89	4191.74
CEP104	792.621	787.018	711.867	669.886	709.622	629.763	771.866	837.013	752.643	946.75	960.736	835.641
LOC124903829	18.1662	42.9803	35.3175	21.2325	13.8307	26.867	39.3029	36.8156	20.677	32.0646	24.4827	41.4437
DFFB	412.086	382.047	283.643	242.051	250.017	321.329	303.506	244.715	311.189	491.939	492.187	463.493
C1orf174	686.492	660.942	705.245	575.401	609.615	657.704	631.031	717.903	734.033	632.854	695.647	700.314
LINC01134	5.7367	13.3717	1.10367	4.2465	2.1278	13.9708	8.73399	5.41405	7.23695	18.5637	5.06539	5.92053
LINC01346	0	0	0	0	0	0	0	0	0	0	0	0
LINC01345	0	0	0	0	0	0	0	0	0	0	0	0
LINC02780	0	0	0	0	0	0	0	0	0	0	0	0
LINC01777	0	0	0	0	0	0	0	0	0	0	0	0
LOC105376674	0	0	0	0	0	0	0	0	0	0	0	0
LOC124904578	0	0	0	0	0	0	0	0	0	0	0	0
LINC01646	0	0	0	0	0	0	0	0	0	0	0	0
AJAP1	1.91223	1.91024	3.31101	10.6163	2.1278	4.29872	0	2.16562	8.2708	0	0	0
LINC02781	0	0	0	0	0	0	0	0	0	0	0	0
LOC124904589	0	0	0	0	0	0	0	0	0	0	0	0
LOC102724429	0	0	0	0	0	0	0	0	0	0	3.37693	0
LINC02782	0	0	0	0	0	0	0	0	1.03385	0	0	0
LOC105376682	0	0	0	0	0	0	0	0	0	0	0	0
LOC124904590	0	0	0	0	0	0	0	0	0	0	0	0
LOC107984911	0	0	0	0	0	0	0	0	0	0	0	0
LOC105376686	0	0	0	0	0	0	0	0	0	0	0	0
LOC124900451	0	0	0	0	0	0	0	0	0	0	0	0
LOC124903830	0	0	2.20734	0	0	0	0	2.16562	0	3.37522	1.68846	0
MIR4689	0	0.955119	0	0	0	0	0	0	0	0	0	0
rna-NR_039838.1	0	0	0	0	0	0	0	0	0	0	0	0
NPHP4	1076.59	1094.57	1193.07	1145.49	1061.77	1176.77	1159.44	1226.82	1121.73	940.843	962.425	968.43
KCNAB2	617.651	583.577	557.354	618.928	612.807	652.331	624.48	599.877	633.75	634.542	601.093	626.73
LOC124903831	6.69282	9.55119	11.0367	5.30813	2.1278	4.29872	4.36699	5.41405	16.5416	5.06283	4.22116	10.1495
CHD5	19.1223	16.237	14.3477	10.6163	8.5112	18.2696	24.0185	16.2422	8.2708	17.7199	16.0404	21.9905
RPL22	25249.1	23089	22109.8	23091.4	23700.5	22034.2	21058.7	24825.6	21956.9	19080.1	20013.4	18223.4
RNF207-AS1	7.64893	14.3268	16.5551	19.1093	17.0224	17.1949	21.835	18.4078	7.23695	15.1885	12.6635	23.6821
RNF207	371.929	369.631	434.846	426.774	303.212	333.151	513.122	446.118	432.149	451.436	382.437	376.377
ICMT	5827.53	5769.87	5039.36	5716.85	6097.21	6066.57	6034.09	5854.76	6848.22	7513.24	8085.21	7741.52
ICMT-DT	96.5678	83.0953	40.8358	59.451	90.4315	45.1366	110.267	88.7905	98.2157	89.4434	99.6194	111.644
HES3	0.956117	1.91024	0	0	0	3.22404	4.36699	0	0	0	1.68846	0
GPR153	783.06	658.077	711.867	707.043	620.254	627.613	731.471	741.725	1009.04	477.594	444.066	465.185
ACOT7	6564.7	6661.95	5673.97	6653.21	6528.09	6191.23	6332.14	6778.39	7120.12	6483.8	6852.63	6454.22
HES2	49.7181	56.352	92.7083	47.7732	44.6838	42.9872	27.2937	49.8093	41.354	35.4398	32.0808	20.299
ESPN	577.494	520.54	539.695	530.813	555.356	492.204	537.14	616.119	656.495	549.317	524.268	472.797
MIR4252	0	0	0	0	0	0	0	0	0	0	0	0
rna-NR_036218.1	0	0	0	0	0	0	0	0	0	0	0	0
TNFRSF25	363.324	377.272	370.833	427.835	323.426	337.45	460.718	359.493	379.423	290.269	255.802	304.484
PLEKHG5	1195.15	1131.82	1287.98	1243.16	887.293	1042.44	1029.52	1180.26	1032.82	770.394	818.905	805.192
NOL9	2742.14	2652.36	2329.85	2393.97	2798.06	2549.14	2996.85	2786.07	3161.51	3337.25	3245.23	3287.59
TAS1R1	0	6.68583	4.41468	0	0	0	8.73399	7.57967	8.2708	4.21903	5.06539	3.38316
LOC107984912	0	0	0	0	0	0	0	0	0	0	0	0
ZBTB48	688.404	685.775	604.811	696.426	596.848	589.999	609.196	628.03	681.307	721.454	599.405	657.179
KLHL21	4864.72	4940.83	5337.35	5483.3	4889.69	4784.48	5016.58	5065.39	5199.23	3668.02	4038.81	3521.87
LOC107984913	81.2699	76.4095	90.501	90.2382	48.9394	48.3606	69.8719	56.3062	43.4217	74.2549	76.8251	59.2053
PHF13	3217.33	3128.97	4110.07	3502.3	3467.25	3427.16	3304.72	3486.65	3103.62	2391.35	2476.98	2332.69
THAP3	483.795	425.028	484.511	406.603	484.075	404.08	369.011	403.888	496.248	431.185	447.443	499.862
DNAJC11	1535.52	1321.88	1344.27	1338.71	1449.03	1289.62	1340.67	1377.34	1568.35	1974.51	1781.33	1735.56
LINC01672	0	0	0	0	0	0	0	0	0	0	0	0
LOC124904847	0	0	0	0	0	0	0	0	0	0	0	0
CAMTA1-DT	62.1476	40.115	55.1835	87.0533	46.8116	54.8087	61.1379	45.478	44.4555	32.9084	45.5885	30.4484
CAMTA1	1438	1407.84	1393.94	1444.87	1389.45	1471.24	1452.03	1549.5	1536.3	1250.52	1219.92	1203.56
LOC124903832	169.233	163.325	291.369	157.121	200.013	147.231	164.854	218.728	113.723	88.5996	102.996	106.57
RPL37P9	0	0	0	0	0	0	0	0	0	0	0	0
CAMTA1-AS3	0	0	2.20734	0	0	0	0	0	0	0	0	0
LOC124900385	0	0	2.20734	7.43138	0	0	2.1835	6.49686	0	1.68761	0	1.69158
CAMTA1-AS2	0	0	0	0	0	2.14936	0	0	0	0	0	0
CAMTA1-AS1	0	0	0	0	0	0	0	0	2.0677	0	0	0
LOC105376691	0	0	0	0	0	0	0	0	0	0	0	0
LOC105376689	72.6649	91.6914	113.678	147.566	86.1759	75.2276	96.0739	95.2873	78.5726	63.2854	64.1616	97.2659
VAMP3	6665.09	6810	6915.6	7369.81	7321.76	7512.01	7026.49	6887.76	7048.79	6361.45	6870.36	6495.67
PER3	1968.64	2002.88	2194.1	2143.42	2419.31	2203.09	2204.24	2330.21	2029.45	2558.42	2634.85	2633.79
LOC124903833	57.367	52.5315	54.0799	50.958	62.7701	66.6302	55.6792	41.1468	40.3201	47.2531	66.6943	66.8174
UTS2	263.888	255.972	163.343	154.997	180.863	160.127	174.68	205.734	269.835	257.361	270.154	253.737
TNFRSF9	103.261	80.23	96.0193	75.3754	77.6647	90.2731	153.937	182.995	165.416	34.596	38.8347	27.9111
PARK7	7709.17	7661.96	6053.63	6526.87	7285.59	7169.19	6642.2	7219.1	7622.57	8292.92	8021.89	7290.71
LOC124903834	126.207	154.729	232.874	184.723	109.582	167.65	165.946	164.587	139.57	76.7863	59.9405	77.8127
ERRFI1	16997.8	15042.2	22756.6	18681.4	16362.8	15985.9	17708.2	18484.7	14421.2	3956.6	4632.3	4003.97
ERRFI1-DT	4.78058	5.73071	8.82936	8.49301	6.3834	0	18.5597	20.5734	8.2708	4.21903	12.6635	1.69158
RPL7AP18	0	0	0	0	0	0	0	1.08281	0	0	0	0
LOC107984915	0	0	2.20734	0	0	2.14936	0	0	0	1.68761	0	0
LINC01714	0.956117	0.955119	0	2.12325	0	0	0	0	0	0	3.37693	0
LOC105376695	0	0	2.20734	0	2.1278	0	2.1835	2.16562	2.0677	1.68761	0	0
LOC124903835	7.64893	0.955119	2.20734	0	3.1917	0	2.1835	0	0	1.68761	1.68846	0
SLC45A1	20.0784	1.91024	13.244	12.7395	14.8946	2.14936	6.55049	31.4015	6.2031	8.43806	11.8192	25.3737
RERE	2109.19	2264.59	2664.26	1845.11	1954.38	1999.98	1907.28	1997.79	2151.44	1926.41	1811.72	1886.11
RERE-AS1	5.7367	6.68583	9.93303	6.36975	7.4473	6.44808	3.27524	17.325	4.1354	6.75044	3.37693	4.22895
SNORD128	0.956117	0	1.10367	1.06163	3.1917	2.14936	2.1835	1.08281	2.0677	1.68761	1.68846	1.69158
LOC124900452	0	0	0	0	2.1278	2.14936	0	1.08281	0	0.843806	0	0.84579
RPL23AP19	0	0	0	0	0	0	0	0	0	0	0	0
ENO1	81507	79518.4	71515.6	93725.6	91175.2	95197.3	89322.5	95210.5	98824.7	73262.6	82201.2	71498
MIR6728	0	0	0	0	0	0	0	0	1.03385	0	0	0.84579
rna-NR_106786.1	0	0	0	0	0	0	0	0	0	0	0	0
ENO1-AS1	48.7619	42.9803	35.3175	33.972	44.6838	38.6885	41.4864	44.3952	54.794	51.4721	43.9001	54.9764
HMGN2P17	1.91223	3.82047	2.20734	2.12325	6.3834	2.14936	2.1835	8.66249	2.0677	11.8133	6.75386	1.69158
LOC112268261	0	0	0	0	0	0	0	2.16562	0	1.68761	0	0
CA6	0	0	0	0	0	0	2.1835	0	0	0	0	1.69158
RN7SL451P	0	0	0	0	0	0	0	0	0	0	0	0
SLC2A7	24.859	21.0126	22.0734	14.8628	3.1917	34.3898	17.468	15.1593	6.2031	15.1885	10.1308	16.9158
SLC2A5	1510.66	1256.94	1465.67	2149.79	2309.73	2355.7	2089.61	2788.24	2181.42	1336.59	1441.1	1335.5
LOC124900441	0	0	0	0	0	0	2.1835	0	0	0	0	0
GPR157	3905.74	3783.22	4158.63	4212.53	4135.38	4224.57	3382.24	3997.74	3364.15	2555.89	2666.08	2502.69
MIR34AHG	216.082	178.607	221.838	157.121	154.266	220.309	104.808	160.256	101.317	167.917	152.806	175.079
MIR34A	0	0	0	0	0	0	0	0	0	0	0	0
rna-NR_029610.1	0	0	0	0	0	0	0	0	0	0	0	0
LNCTAM34A	19.1223	5.73071	5.51835	12.7395	9.5751	23.643	7.64224	16.2422	18.6093	10.1257	21.95	21.1448
H6PD	3609.34	3957.06	3892.65	4216.78	3672.58	3710.87	3140.96	3243.02	3338.3	4134.65	4286.17	4156.21
LOC124903836	10.5173	15.2819	8.82936	1.06163	3.1917	2.14936	3.27524	3.24843	16.5416	7.59425	10.975	7.61211
SPSB1	3167.61	2722.09	3382.75	3383.4	2974.67	2977.94	3038.34	3239.77	2943.37	1183.02	1180.24	992.112
LINC02606	1.91223	5.73071	3.31101	8.49301	8.5112	2.14936	0	4.33124	8.2708	9.28186	4.22116	21.1448
SLC25A33	3582.57	3496.69	3354.05	3571.31	3659.82	3919.36	3238.13	3505.06	3332.1	3070.61	3325.43	3235.15
TMEM201	1863.47	2021.99	1784.64	1869.52	1996.94	1803.31	1993.53	1849.44	2347.87	2199.8	2137.6	2085.72
LOC124903837	9.56117	5.73071	12.1404	4.2465	3.1917	4.29872	12.0092	6.49686	10.3385	1.68761	3.37693	10.9953
PIK3CD	231.38	220.632	322.272	242.051	235.122	190.218	287.13	352.996	317.392	124.039	103.841	93.8827
LOC105376712	0	0	0	0	0	0	0	0	0	0	0	0
PIK3CD-AS1	0	0	2.20734	0	0	0	0	0	0	0	0	0
PIK3CD-AS2	63.1037	50.6213	80.5679	87.0533	52.1311	58.0327	44.7617	61.7202	85.8095	50.6283	58.252	79.5043
LOC124903839	1.91223	0	0	0	3.1917	0	1.09175	0	0	5.06283	0.844232	0.84579
CLSTN1	8034.25	8075.53	8738.86	7603.36	8332.47	7249.79	7378.03	8059.36	8260.46	8310.64	8592.59	7896.3
MZT1P1	2.86835	9.55119	0	2.12325	4.2556	0	4.36699	6.49686	1.03385	4.21903	0	0
CTNNBIP1	1631.14	1630.39	1432.56	1525.56	1458.61	1513.15	1221.67	1398.99	1476.34	1413.37	1507.8	1430.23
LOC105376717	4.78058	0.955119	2.20734	2.12325	0	2.14936	0	2.16562	6.2031	3.37522	0	3.38316
LOC124903838	1.91223	0.955119	15.4514	8.49301	6.3834	15.0455	8.73399	7.57967	3.10155	10.1257	6.75386	12.6869
LZIC	1979.16	2000.97	1890.59	2209.24	2128.86	2284.77	2140.92	2128.81	1888.84	2351.69	2521.72	2394.43
NMNAT1	614.783	578.802	516.518	578.586	496.841	548.087	512.03	511.087	583.091	730.736	787.669	781.51
TMEM274P	0	2.86536	2.20734	0	4.2556	0	4.36699	2.16562	1.03385	5.90664	0	3.38316
MIR5697	0	0	0	0	0	0	0	0	0	0	0	0
rna-NR_049882.1	0	0	0	0	0	0	0	0	0	0	0	0
LOC124903840	0	0	0	0	0	0	0	1.08281	0	0	0	0.84579
RBP7	143.417	114.614	103.745	59.451	87.2398	131.111	72.0554	122.358	144.739	99.5691	111.439	91.3453
UBE4B	2231.58	2287.51	2570.45	2287.8	2317.17	2073.06	2437.87	2224.09	2165.92	2598.08	2539.45	2465.48
KIF1B	8039.03	8008.67	9132.87	8218.04	8426.09	7953.71	9505.85	9094.53	9679.94	6406.17	6578.26	6378.95
RNU6-37P	15.2979	6.68583	6.62202	9.55463	9.5751	10.7468	2.1835	7.57967	0	4.21903	3.37693	12.6869
PGD	7742.63	7560.72	6924.43	7143.68	7600.5	7119.76	6882.38	7306.81	7539.87	7759.64	7750.05	6905.88
CENPS	25.8151	49.6662	38.6285	23.3558	39.3643	20.4189	42.5782	30.3187	42.3878	43.8779	70.0713	49.0558
CENPS-CORT	0	0	0	2.12325	0	0	0	0	0	2.53142	0.844232	0
CORT	1.91223	3.82047	2.20734	1.06163	1.0639	4.29872	13.101	3.24843	6.2031	9.28186	5.90962	5.07474
DFFA	9887.2	10073.6	9654.91	10177.8	9858.1	10073	9579	9917.46	10979.5	9607.57	10410.2	9882.21
PEX14	641.554	687.685	636.818	670.947	637.276	659.854	566.617	552.233	585.159	654.793	638.239	640.263
RN7SL614P	0	0	0	0	1.0639	0	0	2.16562	0	0	0	2.53737
CASZ1	473.278	512.899	586.049	558.415	550.036	500.801	530.59	646.438	623.411	333.303	378.216	265.578
LOC105376733	0.956117	0	0	0	0	0	2.1835	0	2.0677	0	0	0
LOC105376735	0	0	0	0	0	0	1.09175	0	0	0	0	0
C1orf127	0	0	0	0	0	0	0	0	0	0	0	0
CFL1P6	0	0	0	4.2465	0	0	0	0	0	0	2.5327	0
TARDBP	4405.79	3993.35	4987.49	4319.75	4702.44	4693.13	4317.86	4489.33	4432.11	3905.98	3768.65	3554.01
MASP2	63.1037	44.8906	49.6652	49.8964	64.8979	61.2568	63.3214	77.9624	39.2863	71.7235	68.3828	59.2053
SRM	1186.54	1283.68	1101.46	1051.01	964.958	1080.05	1191.1	1054.66	1389.49	1346.71	1313.63	1151.97
EXOSC10	3311.99	3436.52	3199.54	3263.44	3156.59	3220.82	3568.93	3313.4	3346.57	3359.19	3246.07	3214
EXOSC10-AS1	7.64893	2.86536	2.20734	5.30813	4.2556	3.22404	7.64224	5.41405	8.2708	6.75044	5.90962	0.84579
MTOR	4582.67	4618.95	4442.27	4416.36	4355.61	4205.22	4547.13	4192.64	4445.55	5310.07	5240.15	5200.76
MTOR-AS1	9.56117	7.64095	5.51835	22.2941	3.1917	1.07468	6.55049	10.8281	2.0677	12.6571	11.8192	3.38316
RNU6-537P	0	0	0	0	1.0639	0	2.1835	0	0	0	0	0.84579
LOC124904848	0	0	0	0	3.1917	0	3.27524	0	0	0	0	0
ANGPTL7	20.0784	23.878	13.244	19.1093	20.2141	26.867	46.9452	42.2296	24.8124	32.9084	21.1058	31.2942
RPL39P6	5.7367	3.82047	0	8.49301	8.5112	10.7468	18.5597	4.33124	0	15.1885	11.8192	8.4579
UBIAD1	1645.48	1572.13	1328.82	1611.55	1594.79	1625.99	1494.6	1561.41	1644.86	2146.64	1839.58	1707.65
UBE2V2P3	1.91223	12.4165	11.0367	10.6163	14.8946	18.2696	8.73399	16.2422	19.6431	12.6571	4.22116	5.92053
LOC105376737	0	0	4.41468	0	2.1278	0	0	0	0	0	0	0
LOC105376739	0	1.91024	0	0	0	6.44808	0	0	0	0	0	0
LOC105376740	0	0	0	0	2.1278	1.07468	0	0	0	1.68761	0	0
LOC124903841	0	0	0	0	0	0	0	0	0	0	0	0
DISP3	10.5173	18.1473	28.6954	23.3558	6.3834	23.643	9.82573	12.9937	19.6431	19.4075	9.28655	15.2242
LOC124903842	0	0	0	0	0	0	0	0	0	0	0	0
LINC01647	0	0.955119	0	0	0	2.14936	0	0	0	0	0	0
FBXO2	5571.29	5044.94	4732.54	5947.23	5336.52	5322.89	5516.6	6047.5	5831.95	4613.93	4773.29	4552.04
FBXO44	1292.67	1287.5	1151.13	1138.06	913.89	1090.8	936.72	1016.76	1098.98	1069.95	984.375	875.393
FBXO6	1301.27	1191.03	1155.54	1377.99	1230.93	1112.29	1022.97	1142.37	1172.39	1081.76	1203.03	1142.66
MAD2L2	1742.04	1656.18	1589.29	1840.86	1685.22	1708.74	1621.25	1768.23	2038.75	1599.86	1761.91	1544.41
DRAXIN	3.82447	2.86536	0	2.12325	1.0639	0	4.36699	5.41405	4.1354	1.68761	1.68846	13.5326
AGTRAP	768.718	760.274	741.667	644.407	602.168	628.688	582.994	599.877	852.926	853.931	756.432	685.09
LOC101060126	0	0	0	2.12325	0	0	0	0	0	0	0	0
C1orf167	1.91223	8.59607	11.0367	10.6163	9.5751	10.7468	9.82573	12.9937	8.2708	8.43806	18.5731	11.8411
C1orf167-AS1	0	0	0	2.12325	2.1278	0	3.27524	2.16562	1.03385	0.843806	0	4.22895
MTHFR	1264.94	1443.18	1462.36	1251.66	1335.19	1230.51	1291.54	1219.24	1261.3	1566.95	1527.22	1611.23
CLCN6	1066.07	1007.65	1316.68	988.374	886.229	1018.8	968.381	1041.66	1001.8	912.154	924.434	951.514
NPPA-AS1	6.69282	1.91024	14.3477	0	9.5751	1.07468	15.2845	14.0765	3.10155	10.9695	14.3519	10.9953
NPPA	0.956117	7.64095	4.41468	4.2465	4.2556	13.9708	6.55049	4.33124	13.44	5.90664	7.59809	6.76632
NPPB	189.311	178.607	226.252	144.381	171.288	196.666	549.149	446.118	684.409	124.883	145.208	133.635
SBF1P2	0	0	0	0	0	0	0	0	0	0	1.68846	0
RNU5E-1	39.2008	34.3843	29.7991	35.0336	37.2365	61.2568	27.2937	57.389	50.6586	31.2208	26.1712	32.9858
LOC124903843	3.82447	0	1.10367	5.30813	2.1278	0	1.09175	2.16562	1.03385	5.06283	5.90962	3.38316
KIAA2013	5250.04	4920.77	4880.43	5270.97	4857.77	4882.27	4800.42	4917.04	5749.24	4948.92	5201.31	5312.41
PLOD1	4748.08	4866.33	4572.51	4813.41	4601.37	4519.03	4646.48	4619.27	5166.15	4786.07	4768.22	4500.45
MFN2	11094.8	11304.8	10353.5	12321.2	11399.7	11726.9	12008.1	12443.7	12118.8	11183	11405.6	10587.6
MIIP	1308.92	1465.15	1400.56	1434.26	1229.87	1303.59	1248.96	1449.88	1392.6	1421.81	1336.42	1515.66
MIR6729	0	0	0	0	0	0	0	0	0	0	0	0
rna-NR_106787.1	0	0	0	0	0	0	0	0	0	0	0	0
TNFRSF8	0	11.4614	3.31101	0	4.2556	0	6.55049	0	6.2031	1.68761	8.44232	5.07474
RPL23AP89	0	0	0	0	0	0	0	0	0	0	0	0
MIR7846	0	0	0	0	0	0	0	0	0	0	0	0
TNFRSF1B	956.117	858.652	831.064	853.547	660.682	799.562	770.774	737.394	928.397	766.175	738.703	683.398
rna-NR_107000.1	0	0	0	0	0	0	0	0	0	0	0	0
LOC124903844	6.69282	9.55119	13.244	15.9244	3.1917	0	5.45874	8.66249	17.5754	5.06283	5.06539	1.69158
MIR4632	0	0	0	0	0	0	0	0	0	0	0	0
rna-NR_039775.2	0	0	0	0	0	0	0	0	0	0	0	0
RPL10P17	0	0	0	0	0	0	0	0	0	0	0	0
LOC124900427	0	0	0	0	0	0	0	0	0	0	0	0
VPS13D	3689.65	3624.68	4133.25	3743.29	3806.64	3552.89	3813.48	3815.82	3588.49	3535.55	3717.15	3511.72
LOC124903845	7.64893	7.64095	15.4514	35.0336	19.1502	18.2696	22.9267	5.41405	4.1354	6.75044	10.1308	4.22895
LOC124904680	3.82447	0.955119	0	0	1.0639	0	2.1835	0	0	0	0	1.69158
SNORA59A	15.2979	26.7433	15.4514	23.3558	29.7892	25.7923	29.4772	34.6499	26.8801	30.377	16.8846	22.8363
LINC02766	6.69282	7.64095	6.62202	13.8011	7.4473	0	2.1835	6.49686	9.30465	3.37522	7.59809	6.76632
DHRS3	3667.66	3281.79	3142.15	3205.05	3018.29	2761.93	2734.83	3044.86	2892.71	2900.16	2743.75	2768.27
MIR6730	0	0	1.10367	0	0	0	0	0	0	0	0	0.84579
rna-NR_106788.2	0	0	0	0	0	0	0	0	0	0	0	0
AADACL4	0	0	0	0	0	0	1.09175	0	0	0	0	0
LOC124903846	0	0	0	2.12325	6.3834	0	0	0	0	0	0	0
AADACL3	0	1.91024	0	2.12325	6.3834	0	2.1835	3.24843	2.0677	1.68761	5.06539	5.07474
LOC124904811	0	0	0	0	0	0	0	0	0	0	0	0
CFAP107	0	0	6.62202	0	0	0	0	0	0	0	1.68846	0
PRAMEF12	0	0	0	0	0	0	0	0	0	0	0	0
PRAMEF1	0	0	0	0	2.1278	0	0	0	0	0	0	0
LINC01784	0	0	0	0	0	0	0	0	0	0	0	0
PRAMEF11	0	0	0	0	0	0	0	0	0	0	0	0
PRAMEF30P	0	0	0	0	0	0	0	0	0	0	0	0
HNRNPCL1	0	0	0	0	0	0	0	0	0	0	0	0
PRAMEF2	0	0	0	0	0	0	0	0	0	0	0	0
PRAMEF4	0	0	0	0	0	0	0	0	0	0	0	0
PRAMEF10	0	0	0	0	0	0	0	0	0	0	0	0
PRAMEF7	0	0	0	0	0	0	0	0	0	0	0	0
RNU6-1072P	0	0	0	0	0	0	0	0	0	0	0	0
PRAMEF6	0	0	0	0	0	0	0	0	0	0	0	0
PRAMEF28P	0	0	0	0	0	0	0	0	0	0	0	0
PRAMEF27	0	0	0	0	0	0	0	0	0	0	0	0
HNRNPCL3	0	0	0	0	0	0	0	0	0	0	0	0
PRAMEF25	0	0	0	0	0	0	0	0	0	0	0	0
PRAMEF34P	0	0	0	0	0	0	0	0	0	0	0	0
PRAMEF35P	0	0	0	0	0	0	0	0	0	0	0	0
HNRNPCL2	0	0	0	0	0	0	0	0	0	0	0	0
PRAMEF36P	0	0	0	0	0	0	0	0	0	0	0	0
PRAMEF26	0	0	0	0	0	0	0	0	0	0	0	0
HNRNPCL4	0	0	0	0	0	0	0	0	0	0	0	0
PRAMEF9	0	0	0	0	0	0	0	0	0	0	0	0
PRAMEF13	0	0	0	0	0	0	0	0	0	0	0	0
PRAMEF18	0	0	0	0	0	0	0	0	0	0	0	0
PRAMEF5	0	0	0	0	0	0	0	0	0	0	0	0
RNU6-771P	0	0	0	0	0	0	0	0	0	0	0	0
PRAMEF8	0	0	0	0	0	0	0	0	0	0	0	0
PRAMEF33	0	0	0	0	0	0	0	0	0	0	0	0
PRAMEF15	0	0	0	2.12325	0	0	0	0	0	0	0	0
PRAMEF14	0	0	0	2.12325	0	0	0	0	0	0	0	0
PRAMEF19	0	0	0	0	2.1278	0	0	0	0	0	0	0
PRAMEF17	0	0	0	0	0	0	0	0	0	0	0	0
PRAMEF20	0	0	0	0	0	0	0	0	0	0	0	0
LRRC38	0	0	0	2.12325	0	0	0	0	0	0	0	0
LOC102724856	0	0	0	0	0	0	0	0	0	0	0	0
LOC107984918	0	0	0	0	0	0	0	0	0	0	0	0
PDPN	0	0	0	0	0	0	0	0	0	0	0	1.69158
LOC105378612	0	0	0	0	0	0	0	0	0	0	0	0
LOC105376756	0	0	0	0	0	0	0	0	0	0	0	0
LOC124900446	3.82447	0	0	0	0	0	0	2.16562	0	0	0	0
PRDM2	1444.69	1423.13	1623.5	1639.15	1624.58	1688.32	1866.89	1786.64	1640.72	1527.29	1398.89	1493.67
KAZN	303.089	234.004	248.326	226.126	257.464	267.595	259.836	271.785	265.699	233.734	261.712	265.578
LOC107985467	32.508	24.8331	22.0734	50.958	14.8946	6.44808	26.202	17.325	18.6093	13.5009	5.06539	11.8411
LOC124903847	7.64893	8.59607	16.5551	8.49301	12.7668	33.3151	17.468	18.4078	10.3385	6.75044	8.44232	20.299
KAZN-AS1	0	0	4.41468	0	0	0	1.09175	0	0	0	0	0
LOC124903850	5.7367	5.73071	2.20734	12.7395	2.1278	2.14936	4.36699	5.41405	2.0677	13.5009	3.37693	0
LOC105376759	0	0	0	0	1.0639	0	0	0	0	0	0	0
LOC124903848	0	0	4.41468	0	1.0639	0	2.1835	8.66249	2.0677	0	0	0
LOC107985469	0	0	0	1.06163	0	0	0	0	0	0	0	0
LOC124903849	0	0	0	0	0	0	0	0	0	0	0	0
TMEM51-AS1	17.2101	29.6087	15.4514	28.6639	25.5336	32.2404	48.0369	23.8218	18.6093	42.1903	43.9001	31.2942
TMEM51	1202.79	1204.4	1207.42	1316.42	1313.92	1221.91	1027.34	1336.19	1323.33	1234.49	1202.19	1174.8
TMEM51-AS2	19.1223	14.3268	19.8661	20.1709	17.0224	16.1202	5.45874	12.9937	12.4062	8.43806	6.75386	20.299
MFFP1	3.82447	21.0126	23.1771	7.43138	6.3834	5.3734	12.0092	5.41405	16.5416	3.37522	2.5327	8.4579
FHAD1	0	0.955119	3.31101	0	0	0	8.73399	2.16562	7.23695	9.28186	1.68846	7.61211
LOC124903853	0	0	0	0	0	0	0	6.49686	2.0677	0	0	0
LOC124903852	0	0	0	0	0	0	0	0	0	0	0	0
FHAD1-AS1	3.82447	0	1.10367	0	0	0	0	0	0	0	0.844232	0
LOC124903851	0	1.91024	0	0	0	0	0	0	0	0	0	0
EFHD2-AS1	3.82447	10.5063	22.0734	9.55463	25.5336	16.1202	4.36699	16.2422	6.2031	5.90664	10.975	0.84579
EFHD2	2836.8	2884.46	2558.31	2880.19	2646.98	2365.37	2687.88	2774.16	3270.07	2568.54	2603.61	2519.61
CTRC	1.91223	0	2.20734	4.2465	0	1.07468	2.1835	6.49686	0	1.68761	0.844232	5.07474
CELA2A	3.82447	0	1.10367	6.36975	4.2556	2.14936	4.36699	1.08281	0	0	1.68846	1.69158
LOC105376767	7.64893	0.955119	8.82936	2.12325	2.1278	2.14936	4.36699	2.16562	11.3723	1.68761	0	0
CELA2B	7.64893	14.3268	12.1404	10.6163	10.639	7.52276	19.6515	19.4906	10.3385	5.06283	5.90962	10.1495
CASP9	996.274	959.894	1084.91	925.738	979.852	957.54	964.014	1000.52	983.191	666.606	641.616	689.319
DNAJC16	1661.73	1712.53	1759.25	1582.88	1675.64	1609.87	1603.78	1560.33	1564.21	1701.11	1501.89	1671.28
SCARNA21B	0	0.955119	2.20734	0	4.2556	1.07468	0	2.16562	0	2.53142	1.68846	2.53737
AGMAT	6276.91	6502.45	5858.28	6234.93	5587.6	6168.66	5430.36	5731.32	6428.48	6104.09	6467.66	5982.27
LOC124903854	3.82447	1.91024	2.20734	0	6.3834	7.52276	4.36699	6.49686	5.16925	3.37522	1.68846	1.69158
LOC124904764	0	0	0	0	0	0	0	0	0	0	0	0
CD24P1	0	1.91024	0	0	0	0	2.1835	0	0	1.68761	0	0
DDI2	4981.37	4876.84	5311.97	5130.84	5621.65	5509.89	5770.98	5520.17	5061.73	5872.04	5902.03	5959.44
RSC1A1	0	1.91024	9.93303	9.55463	2.1278	2.14936	7.64224	3.24843	2.0677	3.37522	4.22116	10.1495
PLEKHM2	2670.43	2662.87	2691.85	3000.15	2562.94	2679.18	2977.2	2773.08	2895.81	2340.72	2308.13	2249.8
SLC25A34	17.2101	15.2819	11.0367	33.972	10.639	17.1949	14.1927	15.1593	15.5077	16.8761	12.6635	15.2242
SLC25A34-AS1	0	0	4.41468	0	0	6.44808	4.36699	2.16562	0	0	0	0
TMEM82	493.356	496.662	527.554	589.202	525.567	573.879	446.525	520.832	554.144	464.937	467.705	460.956
FBLIM1	1131.09	1113.67	1222.87	1039.33	1016.02	1038.14	1014.23	1248.48	1151.71	718.922	715.909	608.123
RPL12P14	71.7087	96.467	86.0863	109.347	115.965	126.812	100.441	122.358	98.2157	94.5062	92.8655	59.2053
UQCRHL	53.5425	87.8709	55.1835	72.1905	100.007	118.215	52.4039	71.4655	88.9111	90.2872	54.0309	58.3595
RPS16P1	1.91223	3.82047	4.41468	0	2.1278	0	2.1835	0	6.2031	8.43806	5.06539	3.38316
SPEN-AS1	162.54	200.575	200.868	198.524	209.588	124.663	222.717	246.881	195.398	202.513	193.329	193.686
SPEN	6282.64	6553.07	8277.53	6978.07	7027.06	6980.05	7369.3	7424.83	6769.65	4934.58	5063.7	4662
LOC124904815	0.956117	5.73071	3.31101	6.36975	1.0639	4.29872	2.1835	1.08281	1.03385	1.68761	0	2.53737
ZBTB17	611.915	670.493	576.116	755.877	622.382	612.568	658.324	677.839	753.677	578.007	553.816	616.581
LOC124903855	50.6742	76.4095	87.19	71.1289	52.1311	70.9289	115.725	96.3702	54.794	58.2226	57.4078	62.5885
SRARP	5.7367	0	2.20734	0	0	0	8.73399	6.49686	2.0677	6.75044	3.37693	1.69158
HSPB7	0	0	0	0	0	0	0	0	0	0	2.5327	0
CLCNKA	9.56117	3.82047	8.82936	2.12325	0	4.29872	3.27524	0	2.0677	1.68761	5.06539	1.69158
CLCNKB	1.91223	0	3.31101	0	4.2556	1.07468	4.36699	2.16562	1.03385	0.843806	0	0.84579
FAM131C	36.3324	25.7882	48.5615	50.958	54.2589	29.0164	19.6515	45.478	42.3878	27.0018	29.5481	21.9905
EPHA2	16020.7	15137.7	19141	19452.2	15451	16478.1	18063	18196.6	16664.6	7904.77	8034.56	7606.19
EPHA2-AS1	279.186	314.234	382.974	339.72	297.892	344.972	276.212	294.525	293.613	207.576	157.027	219.905
ARHGEF19	0	0	0	0	1.0639	0	0	0	0	0	1.68846	0
ANO7L1	0	0	0	0	0	0	0	0	0	0	0	0
CPLANE2	0	0	0	0	0	0	0	0	0	0	0	0
MT1XP1	0	0	0	0	0	0	0	0	0	0	0	0
FBXO42	0	0	0	0	0	0	0	0	0	0	0	0
SZRD1	0	0	0	0	0	0	0	0	0	0	0	0
RPL22P3	0	0	0	0	0	0	0	0	0	0	0	0
SPATA21	0	0	0	0	1.0639	0	0	0	0	0	0	0
NECAP2	0	0	0	0	0	0	0	0	0	1.68761	0	1.69158
LINC01772	0	0	0	0	0	0	0	0	0	0	0	0
CROCCP3	11.4734	13.3717	5.51835	22.2941	0	8.59744	13.101	12.9937	11.3723	10.9695	10.975	13.5326
RNU1-1	0.956117	0	0	2.12325	0	0	0	0	0	1.68761	0	0
TRN-GTT5-1	0	0	0	0	0	0	0	0	0	0	0	0
LINC01783	0	0	0	0	0	0	0	0	0	0	0	0
TRE-TTC4-1	0	0	0	0	0	0	0	0	0	0	0	0
LOC124903856	0	0	0	0	0	0	0	0	0	0	0	0
TRG-CCC1-1	0	0	0	0	0	0	0	0	0	0	0	0
NBPF1	239.985	244.51	155.618	168.798	212.78	180.546	180.138	249.046	190.228	374.65	348.668	384.835
LOC124900584	142.461	137.537	156.721	177.291	147.882	118.215	128.826	108.281	141.637	163.698	114.816	149.705
CROCCP2	95.6117	73.5441	80.5679	98.7312	75.5369	78.4517	69.8719	84.4592	81.6741	85.2244	75.1367	82.0416
MST1P2	987.669	931.241	1194.17	1254.84	1013.9	1171.4	1173.63	1200.84	921.16	750.987	695.647	859.323
RNU1-3	0	0	0	0	0	0	0	0	0	0	0	0
LOC124903857	0	0	0	0	0	0	0	0	0	0	0	0
TRG-CCC4-1	0	0	0	0	0	0	0	0	0	0	0	0
EIF1AXP1	48.7619	29.6087	69.5312	56.2662	32.9809	52.6593	45.8534	47.6437	33.0832	73.4111	68.3828	40.5979
ESPNP	4.78058	6.68583	3.31101	1.06163	4.2556	2.14936	0	2.16562	2.0677	5.06283	0.844232	0
LOC124903858	1.91223	2.86536	0	0	0	0	0	0	2.0677	5.06283	0	0.84579
TRG-CCC5-1	0	0	0	0	0	0	0	0	0	0	0	0
LOC124903859	0	0	0	0	0	0	2.1835	2.16562	0	0	5.06539	3.38316
RNU1-4	0	0	0	0	0	0	0	0	0	0	0	0
CROCCP4	0	0	0	0	0	0	0	0	0	0	0	0
MST1L	0	17.1921	5.51835	28.6639	6.3834	18.2696	13.101	5.41405	8.2708	7.59425	1.68846	13.5326
MIR3675	0	0	0	0	0	0	0	0	0	0	0	0
rna-NR_037446.1	0	0	0	0	0	0	0	0	0	0	0	0
TRG-CCC1-2	0	0	0	0	0	0	0	0	0	0	0	0
LOC124903860	0	0	0	0	0	0	0	0	0	0	0	0
LOC112267871	0	0	0	0	0	0	0	0	0	0	0	0
TRE-TTC3-1	0	0	0	0	0	0	0	0	0	0	0	0
LOC107985101	0	0	0	0	0	0	0	0	0	0	0	0
LOC105376805	0	0	0	0	0	0	0	0	0	0	0	0
TRN-GTT4-1	0	0	0	0	0	0	0	0	0	0	0	0
RNU1-2	0	0	0	0	0	0	0	0	0	0	0	0
CROCC	0	3.82047	0	7.43138	0	4.29872	0	2.16562	0	1.68761	4.22116	0
MFAP2	0	0	0	0	0	0	0	0	0	0	0	0
LOC105376806	0	0	0	0	0	0	0	0	0	0	0	0
ATP13A2	1.91223	1.91024	1.10367	4.2465	2.1278	1.07468	2.1835	0	1.03385	1.68761	0.844232	0
SDHB	0	1.91024	0	1.06163	2.1278	4.29872	2.1835	4.33124	2.0677	2.53142	0.844232	5.07474
PADI2	0	0	0	0	0	0	0	0	0	0	0	0
LOC124903861	0	0	0	0	0	0	0	0	0	0	0	0
LOC105376808	0	0	0	0	0	0	0	0	0	0	0	0
LINC02783	0	0	0	0	0	0	0	0	0	0	0	0
PADI1	0	0	0	0	0	0	0	0	0	0	0	0
PADI3	0	0	0	0	0	0	0	0	0	0	0	0
MIR3972	0	0	0	0	0	0	0	0	0	0	0	0
rna-NR_039768.1	0	0	0	0	0	0	0	0	0	0	0	0
PADI4	0	0	0	0	0	0	0	0	0	0	0	0
PADI6	0	0	0	0	0	0	0	0	0	0	0	0
RCC2	0.956117	0	0	0	0	0	0	0	0	0	0	3.38316
RCC2-AS1	0	0	0	0	0	0	0	0	0	0	0	0
LOC124903862	0.956117	0	0	0	0	0	0	0	0	0	0	0
LOC124904837	0	0	0	0	0	0	0	0	0	0	0	0
ARHGEF10L	4159.11	4266.51	4229.27	4511.91	3438.53	3586.21	3761.07	3762.77	3581.26	3466.35	3235.94	3359.48
LINC02810	0	0	0	0	0	0	0	0	0	0	0	0
ACTL8	4766.24	4997.18	3527.33	3947.12	4132.19	3729.14	4573.33	4392.96	5553.84	5746.32	5473.16	5404.6
LOC105376809	0	0	0	0	0	0	0	0	0	0	0	0
LOC105376812	0	0	0	0	0	0	0	0	0	0	0	0
LINC01654	0	0	0	0	0	0	0	0	0	0	0	0
IGSF21	0	0	0	0	0	1.07468	0	0	0	0	0	0
IGSF21-AS1	0	0	0	0	0	1.07468	2.1835	0	0	0	0	0
LOC124903864	0	0	0	0	0	0	0	0	0	0	0	0
LOC124903863	0	0	0	0	0	0	0	0	0	0	0	0
LOC124903865	0	0	0	0	0	0	0	0	0	0	0	0
KLHDC7A	99.4361	93.6016	108.16	38.2185	102.134	73.0783	124.459	77.9624	126.13	214.327	197.55	211.448
DYNLL1P3	0	0	0	0	0	0	0	0	0	0	0	0
PAX7	0	0	2.20734	0	0	0	0	0	0	0	0	0
TAS1R2	0	0	0	3.18488	0	0	0	0	0	0	0	0
ALDH4A1	1160.73	1282.72	934.809	1129.57	1081.99	948.943	950.913	952.873	1266.47	1347.56	1355.84	1302.52
MIR4695	0	0	0	0	0	0	0	0	0	0	0	0
rna-NR_039844.2	0	0	0	0	0	0	0	0	0	0	0	0
MIR1290	0	0	0	1.06163	0	0	0	0	0	1.68761	0	0
rna-NR_031622.1	0	0	0	0	0	0	0	0	0	0	0	0
LOC124903866	1.91223	2.86536	3.31101	0	0	4.29872	4.36699	0	2.0677	3.37522	5.06539	4.22895
IFFO2	1366.29	1408.8	1478.92	1355.7	1458.61	1471.24	1572.12	1683.77	1773.05	1643.73	1558.45	1433.61
LOC105376815	0	0	0	0	0	0	2.1835	0	0	0	1.68846	0
UBR4	15717.6	16543.6	16374.1	14623.9	14872.3	13445.3	16786.7	15924.9	17522.7	17385.8	16976.7	17967.1
EMC1-AS1	20.0784	28.6536	26.4881	31.8488	15.9585	17.1949	18.5597	22.739	15.5077	23.6266	15.1962	25.3737
EMC1	5042.56	5008.64	4934.51	4872.86	4875.86	4925.26	5166.15	4648.51	4903.55	5117.68	5598.95	5268.43
MRTO4	4323.56	4054.48	3527.33	3914.21	4174.74	4092.38	4245.81	4059.46	4765.01	4206.37	4450.79	4003.12
AKR7L	41.113	29.6087	17.6587	18.0476	37.2365	25.7923	9.82573	19.4906	26.8801	27.8456	16.0404	23.6821
AKR7A3	439.814	400.195	354.278	321.673	297.892	269.745	262.02	264.206	327.73	331.616	368.085	334.933
LOC124903867	30.5957	42.0252	50.7688	49.8964	60.6423	33.3151	55.6792	40.064	40.3201	41.3465	30.3924	49.0558
LOC100506730	51.6303	70.6788	70.6349	64.7592	85.112	49.4353	77.5141	96.3702	89.9449	70.8797	71.7597	93.8827
AKR7A2	2873.13	2854.85	2357.44	2852.59	2667.2	2542.69	2358.18	2567.34	3159.45	3094.24	3172.62	2988.18
RNU6-1099P	0.956117	0	0	2.12325	3.1917	2.14936	0	1.08281	0	2.53142	0	3.38316
SLC66A1	1983.94	2078.34	1855.27	1816.44	1884.17	1785.04	1864.71	2086.58	2299.28	2133.98	2160.39	2081.49
CAPZB	3281.39	3216.84	3213.89	2974.68	2926.79	2944.62	2977.2	3318.81	3304.18	3382.82	3405.63	2984.79
LOC124903868	11.4734	4.77559	18.7624	20.1709	13.8307	7.52276	12.0092	18.4078	11.3723	11.8133	12.6635	6.76632
RN7SL277P	0	0.955119	2.20734	2.12325	1.0639	2.14936	0	1.08281	3.10155	0	0	1.69158
LOC124903869	3.82447	2.86536	13.244	5.30813	8.5112	6.44808	6.55049	11.9109	4.1354	0	0.844232	3.38316
LOC105376819	3.82447	10.5063	17.6587	14.8628	8.5112	9.67212	6.55049	8.66249	4.1354	8.43806	10.975	12.6869
LOC105376818	0	0	0	0	0	0	0	0	0	0	0	0
LOC105376817	0	0	0	0	0	0	0	0	1.03385	0	0	0
LOC124904816	0	0	0	0	0	0	0	0	0	0	0	0
MICOS10-DT	0.956117	0	0	0	8.5112	0	0	0	0	0	0	1.69158
MICOS10	756.288	800.389	788.021	556.292	686.216	562.058	674.7	787.203	831.215	815.96	731.949	691.856
MICOS10-NBL1	0	0	0	0	0	0	0	0	0	0	0	0
RPS14P3	31.5518	72.589	33.1101	57.3278	41.4921	67.7049	72.0554	66.0515	34.117	58.2226	52.3424	53.2848
NBL1	29.6396	33.4292	35.3175	30.7871	26.5975	23.643	30.569	20.5734	20.677	15.1885	10.975	29.6027
HTR6	3.82447	5.73071	6.62202	1.06163	6.3834	0	4.36699	8.66249	4.1354	1.68761	6.75386	1.69158
TMCO4	620.52	595.039	582.738	503.211	525.567	566.356	564.434	572.807	577.922	693.608	623.888	723.151
RNF186	6.69282	13.3717	15.4514	10.6163	8.5112	6.44808	4.36699	15.1593	4.1354	0	0	15.2242
RNF186-AS1	0	0	0	0	0	0	0	0	0	1.68761	0	0
LOC105376823	0	0	2.20734	2.12325	0	0	0	0	0	0	0	1.69158
OTUD3	1733.44	1641.85	1748.21	1753.81	1984.17	1842	1750.07	2020.52	1776.15	1676.64	1627.68	1739.79
PLA2G2E	1.91223	0.955119	2.20734	0	0	3.22404	1.09175	2.16562	4.1354	1.68761	1.68846	0.84579
PLA2G2A	194.092	192.934	229.563	116.779	197.885	131.111	113.542	165.67	129.231	200.826	163.781	141.247
PLA2G5	0	0	0	0	0	0	1.09175	0	0	0	0	0
PLA2G2D	0	0	0	0	0	0	0	0	0	0	0	0
PLA2G2F	0	0	4.41468	0	0	0	10.9175	0	0	1.68761	0	0
LOC117779438	0	0	0	0	0	0	0	0	0	0	0	0
PLA2G2C	1.91223	0	0	0	0	0	0	0	0	0	0	0
UBXN10	15.2979	11.4614	8.82936	4.2465	12.7668	19.3442	17.468	6.49686	26.8801	10.1257	18.5731	15.2242
LOC105376825	0	0	0	0	0	0	0	0	0	0	0	0
LOC105376826	0	0	0	0	0	0	0	0	0	0	0	0
LINC01757	0	0	0	0	0	0	0	0	0	0	0	0
LOC105376828	0	0	0	0	0	0	0	1.08281	0	0	0	0
VWA5B1	0	3.82047	0	0	0	4.29872	0	0	0	0	0	1.69158
LOC124903870	0	0	0	0	0	0	0	0	0	0	0	0
LINC01141	0	5.73071	0	0	0	0	0	0	0	0	0	0
LOC124903871	9.56117	8.59607	13.244	5.30813	5.3195	2.14936	13.101	12.9937	10.3385	7.59425	5.06539	7.61211
CAMK2N1	2158.91	2001.93	2461.19	1978.87	2198.02	2135.39	1871.26	2240.34	2078.04	1582.14	1870.82	1661.13
MUL1	1265.9	1181.48	973.437	1215.56	1170.29	1011.27	1144.15	1136.95	1438.09	1492.69	1468.96	1442.92
RPS4XP4	0	0	0	0	0	0	0	0	0	0	0	0
FAM43B	15.2979	24.8331	35.3175	19.1093	31.917	23.643	15.2845	21.6562	19.6431	33.7522	43.9001	30.4484
CDA	19.1223	5.73071	16.5551	19.1093	8.5112	15.0455	4.36699	28.1531	24.8124	3.37522	14.3519	17.7616
PINK1	368.105	298.952	274.814	370.507	387.26	301.985	328.616	322.678	378.389	362.836	303.924	315.48
MIR6084	0	0	0	0	0	0	0	0	0	0	0	0
rna-NR_106732.1	0	0	0	0	0	0	0	0	0	0	0	0
PINK1-AS	100.392	116.524	86.0863	73.2522	58.5145	111.767	75.3306	80.128	119.927	108.007	100.464	120.102
DDOST	10068.9	9545.46	9693.54	9257.38	9491.05	9201.41	8844.25	9242.87	10174.1	9835.4	10100.4	9009.36
KIF17	315.518	274.119	240.6	322.734	212.78	312.732	251.102	243.632	283.275	315.583	266.777	274.882
SH2D5	952.292	1024.84	712.971	727.214	587.273	786.666	850.472	817.522	914.957	1010.88	1096.66	1052.16
HP1BP3	10743.9	10919.9	11434	12116.3	12313.6	11985.9	11509.2	11600.2	10732.4	11574.5	12090.2	11452
EIF4G3	2634.1	2662.87	2738.21	2340.88	2376.75	2397.61	2651.86	2442.82	2604.27	2782.03	2691.41	2557.67
LOC105376830	2.86835	5.73071	6.62202	10.6163	4.2556	2.14936	3.27524	8.66249	5.16925	3.37522	5.06539	7.61211
LOC105376829	14.3417	13.3717	7.72569	10.6163	9.5751	5.3734	12.0092	9.7453	13.44	7.59425	7.59809	6.76632
MIR1256	0	0.955119	0	1.06163	1.0639	1.07468	2.1835	4.33124	0	1.68761	0	0
rna-NR_031657.1	0	0	0	0	0	0	0	0	0	0	0	0
RPS15AP6	4.78058	9.55119	3.31101	5.30813	4.2556	4.29872	2.1835	1.08281	5.16925	3.37522	0.844232	3.38316
ECE1	3309.12	3435.56	3591.34	3250.7	3225.75	3041.34	3300.36	3324.23	3599.87	3032.64	3206.39	3101.51
LOC124903872	22.9468	15.2819	25.3844	24.4174	14.8946	6.44808	22.9267	4.33124	7.23695	6.75044	10.1308	11.8411
ECE1-AS1	0	15.2819	19.8661	6.36975	12.7668	17.1949	8.73399	16.2422	5.16925	8.43806	6.75386	10.1495
PPP1R11P1	0	0	0	0	0	0	0	0	0	0	0	0
LOC105376832	0	0	0	0	0	0	0	0	0	0	0	0
HS6ST1P1	2.86835	1.91024	6.62202	0	0	2.14936	13.101	4.33124	6.2031	10.1257	5.06539	5.07474
CROCCP5	0	0	0	0	0	0	0	0	0	0	0	0
NBPF3	1107.18	1191.99	1012.07	994.743	1059.64	966.138	939.995	973.447	1076.24	1478.35	1373.57	1370.18
PFN1P10	3.82447	15.2819	2.20734	12.7395	12.7668	5.3734	9.82573	2.16562	6.2031	5.90664	7.59809	6.76632
ALPL	59.2792	55.3969	30.9028	27.6023	38.3004	45.1366	58.9544	25.9875	85.8095	32.0646	25.327	44.8269
LINC02596	0	1.91024	0	0	0	0	4.36699	0	0	0.843806	0.844232	2.53737
RAP1GAP	1381.59	1315.2	1353.1	1294.12	1222.42	1116.59	1227.13	1270.14	1138.27	1092.73	1026.59	885.542
USP48	1660.77	1449.87	1611.36	1555.28	1707.56	1621.69	1641.99	1662.11	1741	1750.05	1711.26	1698.35
LOC124904736	0	2.86536	0	0	0	0	1.09175	0	0	0	0.844232	0
LDLRAD2	25.8151	33.4292	25.3844	56.2662	29.7892	38.6885	48.0369	38.9812	27.9139	32.0646	26.1712	38.0606
HSPG2	11395	11026.8	11909.7	11294.6	10350.7	10449.1	11606.4	12283.4	12482.7	11887.5	11660.5	11776.8
CELA3B	1.91223	0	2.20734	0	0	1.07468	4.36699	3.24843	5.16925	0	0	0
CELA3A	1.91223	0	0	0	2.1278	0	0	0	4.1354	6.75044	0	1.69158
LINC01635	11.4734	3.82047	5.51835	20.1709	6.3834	1.07468	13.101	8.66249	3.10155	10.1257	9.28655	12.6869
LINC00339	160.628	165.236	158.929	146.504	195.758	174.098	149.57	137.517	150.942	245.547	246.516	234.284
CDC42	26620.2	26602.9	24125.1	24877.1	25995.3	25736.4	24795.8	26403.3	26892.5	22152.4	24741.1	22981
LOC124903873	87.0066	63.9929	101.538	64.7592	84.0481	76.3023	81.8811	71.4655	93.0465	43.8779	55.7193	60.8969
WNT4	58.3231	86.9158	91.6046	62.6359	34.0448	85.9744	67.6884	71.4655	59.9633	43.0341	45.5885	52.439
LOC105376845	10.5173	18.1473	25.3844	8.49301	11.7029	12.8962	13.101	28.1531	9.30465	10.9695	7.59809	16.9158
LOC105376850	21.0346	21.0126	49.6652	12.7395	21.278	32.2404	39.3029	23.8218	15.5077	5.90664	8.44232	11.8411
LOC107985377	0	0	6.62202	0	0	2.14936	0	4.33124	2.0677	1.68761	0	0
MIR4418	0	0	0	0	0	0	0	0	0	0	0	0
rna-NR_039613.1	0	0	0	0	0	0	0	0	0	0	0	0
LOC105376856	1.91223	0	0	2.12325	0	2.14936	0	0	0	0	0	3.38316
ZBTB40	1343.34	1346.72	1281.36	1356.76	1327.75	1246.63	1408.36	1437.97	1464.97	1473.28	1400.58	1493.67
EPHA8	151.066	91.6914	124.715	128.457	89.3676	118.215	100.441	137.517	182.991	118.977	116.504	78.6585
MIR6127	0	0	0	0	0	0	0	0	0	0	0	0
rna-NR_106742.1	0	0	0	0	0	0	0	0	0	0	0	0
C1QA	0	0	0	0	0	0	0	0	0	0	0	0
C1QC	0	0	0	0	0	0	0	0	0	0	0	0
C1QB	0	0	0	0	0	0	0	0	0	0	1.68846	0
EPHB2	2335.79	2489.99	2247.07	2020.27	1922.47	1966.66	1842.87	1727.08	2399.57	2482.48	2331.77	2455.33
MIR4684	0	0	0	0	0	0	0	0	0	0	0	0
rna-NR_039832.1	0	0	0	0	0	0	0	0	0	0	0	0
MIR4253	0	0	0	0	0	0	0	0	0	0	0	0
rna-NR_036214.1	0	0	0	0	0	0	0	0	0	0	0	0
LOC124903874	2.86835	0	0	4.2465	1.0639	0	5.45874	3.24843	4.1354	0.843806	10.975	0.84579
LACTBL1	1.91223	14.3268	4.41468	8.49301	19.1502	17.1949	16.3762	6.49686	11.3723	1.68761	3.37693	0
TEX46	1.91223	0	0	0	0	0	4.36699	4.33124	2.0677	1.68761	5.06539	0.84579
KDM1A	6506.37	6436.54	6260.02	6559.79	6680.23	6513.64	6195.67	5802.78	6105.92	6803.6	6635.66	6467.76
MIR3115	0	0	0	0	0	0	0	0	0	0	0	0
rna-NR_036057.1	0	0	0	0	0	0	0	0	0	0	0	0
LUZP1	3633.24	3456.57	4058.2	3536.28	3726.84	3847.36	4576.61	4451.43	4049.59	2559.26	2494.71	2479.01
HTR1D	334.641	330.471	305.717	197.462	248.953	251.475	244.552	171.084	256.395	414.309	409.453	385.68
RPL29P6	0	0	0	0	0	0	0	0	0	0	0	0
LINC01355	0	0	0	0	0	0	0	0	0	0	0	0
HNRNPR	0	0	0	0	0	0	0	0	0	0	0	0
ZNF436	0	0	0	0	0	0	0	0	0	0	0	0
ZNF436-AS1	0	0	0	0	0	0	0	0	0	0	0	0
TCEA3	0	0	0	0	0	0	0	0	0	0	0	0
LOC124903875	0	0	0	0	0	0	0	0	0	0	0	0
ASAP3	0	1.91024	0	0	0	0	0	0	0	0	0	0
E2F2	0	0	0	0	0	0	1.09175	0	0	0	1.68846	0
LOC101928163	0	0	0	0	0	0	0	0	0	0	0	0
LOC124903876	0	0	0	0	0	0	0	0	0	0	0	0
LOC105376859	0	0	0	0	0	0	0	0	0	0	0	0
ID3	0	0	0	0	0	0	0	0	0	0	0	0
LOC107984928	0	0	0	0	0	0	0	0	0	0	0	0
MDS2	0	0	0	0	0	1.07468	0	0	0	0	0	0
RPL11	33825.5	32246.7	28504.5	29380.5	29295.6	28990.6	27136.5	32022	32838.2	26494.7	26071.6	22929.4
ELOA	1435.13	1633.25	1666.54	1329.16	1322.43	1377.74	1349.4	1341.6	1375.02	1298.62	1365.97	1347.34
ELOA-AS1	12.4295	7.64095	9.93303	23.3558	18.0863	15.0455	26.202	5.41405	14.4739	12.6571	7.59809	15.2242
PITHD1	2383.6	2319.03	2200.72	2408.83	2543.79	2507.23	2520.85	2517.53	2829.65	2311.18	2380.73	2312.39
LOC105376860	8.60505	18.1473	24.2807	13.8011	8.5112	16.1202	15.2845	23.8218	8.2708	11.8133	8.44232	15.2242
LYPLA2	2381.69	2480.44	2266.94	2284.62	2169.29	2093.48	2208.61	2521.87	2767.62	2247.9	2359.63	2297.17
GALE	4385.71	4382.08	3599.07	4226.33	3774.72	4131.07	4139.91	4154.74	4674.04	3936.35	3940.03	3778.14
HMGCL	1557.51	1535.83	1396.14	1564.84	1655.43	1550.76	1461.85	1408.74	1580.76	1674.11	1794.84	1728.8
LOC105376861	1.91223	6.68583	0	8.49301	4.2556	3.22404	0	0	2.0677	1.68761	4.22116	1.69158
FUCA1	3013.68	2845.3	2557.2	2698.65	2838.49	2732.91	2611.46	2619.32	2614.61	2899.32	3283.22	2857.92
CNR2	5.7367	3.82047	0	0	2.1278	0	0	0	0	0	5.06539	3.38316
LOC124904841	0	0	0	0	0	0	0	0	0	0	0	0
BTBD6P1	0	0	0	0	0	0	0	0	0	1.68761	0	3.38316
MIR378F	0	0	0	0	0	0	0	0	0	0	0	0
rna-NR_039615.1	0	0	0	0	0	0	0	0	0	0	0	0
LOC124903877	0	0	0	0	0	2.14936	0	0	0	0	4.22116	2.53737
PNRC2	8693.01	8290.43	8266.49	9451.65	9969.81	10250.3	9807.17	10210.9	9320.16	7769.76	8048.91	7587.58
SRSF10	6791.3	6390.7	5678.38	6450.44	7087.7	6828.52	6836.53	6192.59	6130.73	7530.96	8125.73	7721.22
LOC105378615	0	0	0	0	0	0	0	0	0	0	0	0
RPL36P5	0	0	0	0	0	0	0	0	0	0	0	0.84579
LOC105376863	20.0784	22.9228	5.51835	11.6779	12.7668	24.7176	16.3762	7.57967	12.4062	13.5009	6.75386	11.8411
LOC107984931	0	0	0	0	0	0	0	0	0	0	0	0
MYOM3	0	5.73071	4.41468	9.55463	4.2556	4.29872	0	8.66249	3.10155	0	5.06539	0
MYOM3-AS1	0	0	0	0	0	2.14936	0	0	0	0	0	0
LOC124903878	0	0	0	0	0	0	0	0	0	0	0	0
LOC105376864	0	0	0	0	0	0	0	0	0	0	0	0
IL22RA1	151.066	91.6914	188.728	184.723	145.754	156.903	162.67	182.995	133.367	136.697	114.816	101.495
LOC124903879	25.8151	30.5638	36.4211	24.4174	32.9809	31.1657	29.4772	42.2296	27.9139	78.4739	54.0309	59.2053
IFNLR1	814.611	810.896	967.919	835.499	809.628	829.653	801.343	853.255	806.403	489.407	577.455	523.544
LINC02800	0	0	0	0	0	0	0	0	0	0	0	0
GRHL3-AS1	12.4295	6.68583	3.31101	11.6779	4.2556	6.44808	14.1927	7.57967	4.1354	14.3447	3.37693	8.4579
GRHL3	265.8	276.984	216.319	181.538	185.119	159.053	180.138	173.25	174.721	225.296	254.958	197.915
STPG1	117.602	138.492	113.678	131.642	126.604	107.468	111.358	123.44	101.317	141.759	148.585	130.252
NIPAL3	582.275	599.814	597.086	618.928	641.532	565.282	635.398	530.577	468.334	705.421	709.999	550.609
RCAN3AS	0	0.955119	11.0367	2.12325	3.1917	1.07468	0	5.41405	0	11.8133	0	0
RCAN3	1961	1934.12	2014.2	1966.13	1948	2133.24	1936.76	1905.75	1818.54	1593.1	1754.31	1664.52
NCMAP-DT	1.91223	2.86536	4.41468	4.2465	4.2556	0	5.45874	8.66249	0	5.06283	1.68846	0
NCMAP	345.158	313.279	321.168	289.824	305.339	280.492	292.589	280.448	268.801	197.451	262.556	204.681
SRRM1	3081.56	3017.22	4006.32	2846.22	3697.05	3126.24	3136.59	3155.31	3086.04	2939.82	3184.44	3023.7
LOC124904829	0.956117	2.86536	2.20734	3.18488	2.1278	0	0	1.08281	2.0677	0	3.37693	0
CLIC4	9343.17	9315.27	8714.58	10223.5	11181.6	10248.2	10265.7	9173.57	9680.97	9775.49	10499.7	9965.1
LOC105376876	0	0	0	0	0	0	0	0	0	0	0	0
RUNX3	90.8311	64.9481	103.745	94.4847	61.7062	77.377	60.0462	67.1343	98.2157	67.5044	69.227	70.2006
MIR6731	0	0	0	0	0	0	0	0	0	0	0	0
rna-NR_106789.1	0	0	0	0	0	0	0	0	0	0	0	0
RUNX3-AS1	0	0	0	2.12325	0	4.29872	0	0	2.0677	0	0	1.69158
MIR4425	0	0	0	0	0	0	0	0	0	0	0	0
rna-NR_039623.1	0	0	0	0	0	0	0	0	0	0	0	0
LINC02793	0	0	0	0	0	0	0	0	0	0	0	0
IFITM3P7	0	0	0	0	0	0	0	0	0	0	0	0
LOC124903880	0.956117	0	0	0	3.1917	2.14936	0	0	1.03385	1.68761	0	3.38316
SYF2	1052.68	964.67	948.053	1103.03	1030.92	939.271	805.71	772.044	756.778	878.402	862.805	894
LOC124903881	17.2101	11.4614	7.72569	7.43138	5.3195	26.867	26.202	17.325	11.3723	21.9389	16.8846	32.14
RSRP1	3217.33	3204.42	3581.41	3670.04	3349.16	3840.91	3868.06	4010.73	3055.03	2540.7	2197.54	2675.23
LOC105376882	0	0	0	0	0	0	0	0	0	0	0	0
RHD	0	0	0	0	0	0	0	1.08281	0	0	0	1.69158
SDHDP6	15.2979	10.5063	25.3844	21.2325	10.639	10.7468	21.835	8.66249	10.3385	14.3447	15.1962	15.2242
TMEM50A	2822.46	2806.14	2685.23	2665.74	2992.75	2782.35	2781.77	2804.48	3068.47	3073.98	3103.4	2873.99
LOC124904723	1.91223	0	6.62202	0	6.3834	1.07468	1.09175	2.16562	2.0677	1.68761	1.68846	1.69158
LOC124904823	3.82447	1.91024	3.31101	1.06163	3.1917	2.14936	1.09175	0	3.10155	0.843806	0	0.84579
RHCE	15.2979	10.5063	18.7624	30.7871	32.9809	27.9417	31.6607	30.3187	17.5754	38.8151	30.3924	35.5232
SDHDP7	10.5173	19.1024	14.3477	12.7395	41.4921	17.1949	29.4772	19.4906	12.4062	28.6894	23.6385	16.07
MACO1	1401.67	1374.42	1393.94	1535.11	1571.38	1408.91	1477.14	1435.81	1414.31	1341.65	1406.49	1382.02
LDLRAP1	475.19	573.071	432.639	531.874	524.503	416.976	534.957	454.78	551.042	672.513	702.401	688.473
MAN1C1	270.581	208.216	225.149	211.264	206.397	223.533	164.854	133.186	179.89	309.677	264.245	259.658
SELENON	3661.93	3935.09	4341.84	3464.08	2938.49	3041.34	3039.43	3230.02	3563.68	3130.52	3283.22	3166.64
LOC646471	47.8058	33.4292	58.4945	49.8964	51.0672	52.6593	75.3306	58.4718	45.4894	63.2854	44.7443	66.8174
MTFR1L	402.525	382.047	403.943	353.521	479.819	451.366	422.507	365.99	510.722	485.188	437.312	468.568
AUNIP	869.11	809.941	580.531	733.583	779.839	758.724	787.151	761.216	848.791	863.213	826.503	917.682
PAQR7	2107.28	2169.07	1908.25	1895	1700.11	1719.49	2015.37	1940.4	2091.48	1841.18	1874.2	1880.19
STMN1	2241.14	2246.44	2378.41	1731.51	2228.87	2130.02	2360.36	2184.03	2530.86	2450.41	2449.96	2267.56
RPL39P7	0	0	0	0	0	0	3.27524	0	2.0677	0	0	3.38316
MIR3917	0	0	0	1.06163	0	0	0	0	0	0	0	0
rna-NR_037481.1	0	0	0	0	0	0	0	0	0	0	0	0
LOC105376885	0	0	0	1.06163	0	0	2.1835	0	2.0677	0	1.68846	0
PAFAH2	1034.52	878.709	850.93	918.306	919.21	941.42	803.527	805.611	875.671	1239.55	1228.36	1260.23
LOC124900433	0	0	0	0	0	0	0	0	0	0	0	0
EXTL1	28.6835	38.2047	38.6285	38.2185	40.4282	27.9417	52.4039	42.2296	32.0493	36.2836	30.3924	38.9063
SLC30A2	439.814	437.444	463.542	611.496	572.378	475.009	466.177	563.062	503.485	497.001	448.287	455.881
LOC105376910	17.2101	24.8331	27.5918	15.9244	10.639	23.643	36.0277	38.9812	24.8124	37.9713	43.9001	35.5232
TRIM63	5.7367	6.68583	13.244	0	4.2556	3.22404	8.73399	2.16562	2.0677	3.37522	1.68846	14.3784
PDIK1L	457.024	390.643	350.967	428.897	493.65	508.324	434.516	398.474	402.168	619.353	630.641	715.538
FAM110D	22.9468	35.3394	39.7321	40.3418	25.5336	15.0455	26.202	28.1531	26.8801	30.377	33.7693	40.5979
C1orf232	0	1.91024	3.31101	4.2465	0	1.07468	1.09175	0	2.0677	0	0	0
ZNF593OS	30.5957	54.4418	62.9092	56.2662	25.5336	40.8378	52.4039	46.5609	54.794	41.3465	37.1462	28.7569
ZNF593	352.807	380.137	363.108	271.776	297.892	274.043	298.047	373.57	412.506	288.582	281.129	231.746
CNKSR1	456.068	460.367	609.226	488.348	398.963	481.457	514.213	524.08	379.423	346.804	361.331	368.765
CATSPER4	0	0	0	0	0	1.07468	0	5.41405	0	0.843806	0	0
LOC124903882	0	0	0	1.06163	2.1278	0	0	0	0	0	0	1.69158
ZPLD2P	11.4734	1.91024	0	0	9.5751	2.14936	8.73399	2.16562	15.5077	5.90664	2.5327	5.07474
CEP85	2008.8	2275.09	2011.99	2210.3	2552.3	2383.64	2123.45	2061.67	2176.25	2378.69	2416.19	2467.17
LOC124904684	0	4.77559	0	5.30813	2.1278	5.3734	0	1.08281	1.03385	0	0.844232	1.69158
SH3BGRL3	2036.53	2060.19	2127.88	1726.2	1438.39	1731.31	2011	2041.1	2124.56	1127.32	1111.01	1148.58
UBXN11	225.644	221.588	299.095	174.107	159.585	180.546	212.891	256.626	196.431	209.264	176.445	150.551
CD52	22.9468	12.4165	14.3477	32.9104	13.8307	11.8215	15.2845	17.325	5.16925	9.28186	5.06539	8.4579
CRYBG2	7056.14	6425.08	8015.96	7148.99	6033.38	6381.45	6797.22	7144.38	6690.04	4716.87	4563.92	4415.87
ZNF683	0	0	0	0	0	0	0	0	0	0	0.844232	0
LIN28A	93.6994	68.7685	64.0129	101.916	80.8564	63.4061	93.8904	129.937	108.554	59.0664	104.685	71.0464
LOC124903883	29.6396	21.9677	11.0367	35.0336	9.5751	22.5683	25.1102	14.0765	23.7785	33.7522	34.6135	38.9063
DHDDS	1369.16	1298.96	1148.92	1162.48	1301.15	1087.58	1272.98	1222.49	1482.54	1470.75	1563.52	1461.53
DHDDS-AS1	8.60505	21.0126	13.244	16.986	2.1278	3.22404	4.36699	3.24843	4.1354	16.0323	15.1962	7.61211
HMGN2	10166.4	10669.6	9047.89	9716	10779.4	10065.5	10331.2	10818.4	11556.4	11409.9	12346.9	11980.6
DPPA2P2	0	0	0	0	0	0	0	0	0	0	0	0
LOC124903884	0	0	0	0	0	0	0	0	2.0677	0	1.68846	0
RPS6KA1	0	0	0	0	0	0	2.1835	0	0	0	0	0
MIR1976	0	0	0	0	0	0	0	0	0	0	0	0
rna-NR_031740.1	0	0	0	0	0	0	0	0	0	0	0	0
RN7SL679P	0	0	0	0	0	0	0	0	0	0	0	0
LOC124904769	0	0	0	0	0	0	0	0	0	0	0	0
LOC124904813	0	0	0	0	0	0	0	0	0	0	0	0
LOC105376888	1.91223	7.64095	12.1404	6.36975	6.3834	16.1202	6.55049	14.0765	11.3723	2.53142	11.8192	5.92053
LOC124900417	60.2353	73.5441	69.5312	70.0673	39.3643	65.5555	76.4224	62.803	93.0465	79.3177	70.9155	67.6632
LOC101928728	0	0	0	0	0	0	0	0	0	0	0	0
ARID1A	2331.01	2577.87	3054.96	2593.55	2487.4	2330.98	2257.74	2483.97	2631.15	2760.09	2545.36	2451.95
PIGV	558.372	540.597	508.792	577.524	634.085	579.253	450.892	428.793	548.974	712.172	617.134	639.417
ZDHHC18	1448.52	1587.41	1238.32	1398.16	1387.33	1322.93	1351.58	1356.76	1700.68	1396.5	1321.22	1451.38
SFN	1900.76	1717.3	1973.36	1854.66	1709.69	1740.98	1954.23	2172.12	2307.55	976.283	1092.44	896.538
GPN2	1452.34	1447	1354.2	1321.72	1268.17	1429.32	1274.07	1384.91	1461.86	1507.88	1480.78	1356.65
GPATCH3	407.306	363.9	310.131	359.891	380.876	346.047	324.249	330.257	372.186	415.152	414.518	422.049
NUDC	1530.74	1545.38	1517.55	991.558	1010.71	974.735	1243.5	1391.41	1558.01	1420.97	1338.95	1234.85
NR0B2	17.2101	11.4614	22.0734	13.8011	5.3195	7.52276	30.569	10.8281	33.0832	15.1885	14.3519	12.6869
KDF1	777.323	952.253	758.222	829.13	802.181	759.799	692.168	677.839	894.28	722.298	841.699	901.612
RPL12P13	0	0	0	0	0	0	0	0	2.0677	0	0	0
RPL32P6	0	0	0	0	0	0	0	0	0	0	1.68846	3.38316
OSTCP2	3.82447	1.91024	2.20734	0	4.2556	4.29872	9.82573	4.33124	4.1354	1.68761	5.06539	1.69158
TRNP1	3408.56	3190.1	3595.76	3248.57	2876.79	3123.02	3555.82	3747.61	4319.42	2101.92	2317.42	2351.3
TENT5B	881.54	1001.92	1306.75	1103.03	939.424	947.868	1080.83	1151.03	1250.96	713.016	763.186	663.945
LOC101928391	0.956117	0	0	8.49301	0	2.14936	0	4.33124	0	5.06283	0	1.69158
SLC9A1	635.818	694.371	873.003	713.412	640.468	649.107	684.526	762.299	850.858	665.763	549.595	584.441
LOC102723760	0	0	0	0	0	0	2.1835	0	0	0	0	0
RPL18AP5	0	0	0	0	0	0	0	0	0	0	0	0
SNRPEP7	0	0	0	0	0	0	0	0	0	0	0	0
WDTC1-DT	0	0	0	0	0	0	0	0	0	0	0	0
WDTC1	1113.88	957.029	1115.81	979.881	779.839	967.212	827.545	896.567	927.363	906.247	949.761	965.892
TMEM222	813.655	897.811	666.617	750.569	760.689	569.581	800.252	779.624	978.022	1004.97	1100.03	904.15
ACTG1P20	79.3577	117.48	145.684	105.101	118.093	140.783	175.771	126.689	114.757	112.226	102.152	130.252
RNU6-48P	0	0	0	0	0	0	0	0	0	0	0	0
SYTL1	817.48	891.126	873.003	796.219	646.851	768.396	741.297	802.363	772.286	661.544	650.903	756.136
MAP3K6	878.671	898.767	868.589	1014.91	808.564	982.258	1139.79	1131.54	968.717	915.529	778.382	831.412
FCN3	0	0.955119	2.20734	0	0	2.14936	0	0	0	2.53142	2.5327	2.53737
CD164L2	0	0	0	0	0	4.29872	0	0	0	0	0	0
GPR3	259.108	251.196	376.352	328.042	294.7	325.628	238.001	330.257	309.121	181.418	180.666	160.7
WASF2	6093.33	5908.36	7503.86	5504.53	5167.36	5274.53	5382.32	5732.4	6031.48	4021.58	4006.73	3537.09
LOC105376892	9.56117	6.68583	17.6587	6.36975	9.5751	10.7468	9.82573	14.0765	24.8124	10.9695	11.8192	5.07474
AHDC1	769.674	890.171	1305.64	765.432	687.28	602.896	703.086	748.222	691.646	491.939	477.835	415.283
FGR	9.56117	13.3717	5.51835	8.49301	10.639	12.8962	6.55049	22.739	11.3723	15.1885	7.59809	6.76632
LOC729973	13.3856	7.64095	8.82936	10.6163	10.639	10.7468	0	2.16562	0	15.1885	6.75386	1.69158
LINC02574	5.7367	0	2.20734	2.12325	0	0	0	0	0	0	1.68846	0
IFI6	606.178	666.673	492.237	532.936	691.535	544.863	1010.96	731.98	1397.76	794.865	766.563	854.248
FAM76A	681.711	606.5	573.909	697.488	743.666	736.156	754.398	756.885	758.846	686.014	727.728	761.211
STX12	1918.93	1902.6	1790.15	1967.19	2169.29	1929.05	1935.67	1949.06	1664.5	1645.42	1782.17	1769.39
LOC124903885	6.69282	4.77559	3.31101	13.8011	6.3834	15.0455	7.64224	11.9109	11.3723	10.9695	8.44232	11.8411
PPP1R8	2057.56	2076.43	1775.81	1913.05	2205.47	1960.22	1872.35	2064.92	1961.21	2046.23	2111.42	2010.44
SCARNA1	0	0.955119	2.20734	7.43138	9.5751	3.22404	5.45874	7.57967	2.0677	3.37522	5.06539	3.38316
THEMIS2	27.7274	20.0575	4.41468	32.9104	17.0224	13.9708	31.6607	14.0765	22.7447	45.5655	38.8347	23.6821
RPA2	2893.21	2641.86	2339.78	2432.18	2857.64	2599.65	2673.69	2257.66	2731.43	3456.23	3415.76	3172.56
SMPDL3B	408.262	375.362	329.997	235.681	358.534	284.79	325.341	265.289	372.186	432.028	484.589	415.283
XKR8	1091.89	1029.62	844.308	927.861	872.398	924.225	888.683	900.899	1046.26	1052.23	1025.74	1109.68
EYA3	1218.09	1121.31	1095.94	1116.83	1088.37	1206.87	1102.67	1084.98	1170.32	1108.76	1182.77	1108.83
RNU7-29P	0	0	0	0	0	0	0	0	0	0	0	0
PTAFR	40.1569	24.8331	26.4881	21.2325	44.6838	41.9125	32.7524	36.8156	41.354	27.0018	20.2616	18.6074
DNAJC8	2371.17	2355.32	2242.66	2358.93	2760.82	2483.59	2268.65	2251.16	2586.69	2826.75	2955.66	2623.64
ATP5IF1	0	0	0	0	0	0	0	0	0	0	0	0
SESN2	0	0	0	0	0	0	0	0	0	0	0	0
MED18	0	0	0	0	0	0	0	0	0	0	0	0
PHACTR4	995.317	954.163	1297.92	903.443	1035.18	895.209	776.233	913.892	1040.05	921.436	886.444	866.089
SNHG3	1306.06	1295.14	1340.96	1338.71	1121.35	1427.18	1458.58	1577.66	1393.63	1113.82	938.786	1193.41
RCC1	2481.12	2727.82	2216.17	2695.47	2541.66	2565.26	2819.99	2751.42	3062.26	3019.14	2919.35	2795.34
SNORA73A	617.651	583.577	970.126	991.558	678.768	622.24	757.673	663.763	659.596	743.393	796.111	626.73
SNORA73B	726.649	816.626	964.608	988.374	720.261	793.114	819.903	807.777	739.203	797.396	798.644	642.801
LOC124904836	0.956117	1.91024	2.20734	0	1.0639	1.07468	4.36699	1.08281	5.16925	0	0	1.69158
PRDX3P2	12.4295	8.59607	3.31101	13.8011	17.0224	17.1949	3.27524	10.8281	10.3385	5.06283	7.59809	5.07474
TRNAU1AP	769.674	823.312	658.891	648.653	692.599	752.276	648.498	744.974	758.846	631.167	772.472	844.099
SNHG12	636.774	637.064	690.898	586.017	521.311	697.467	632.122	772.044	639.953	383.088	358.799	453.344
SNORD99	20.0784	22.9228	11.0367	14.8628	15.9585	23.643	28.3855	22.739	34.117	20.2513	15.1962	24.5279
SNORA61	0	0	0	0	0	0	0	0	0	0	0	0
SNORA44	4.78058	4.77559	0	0	2.1278	3.22404	4.36699	3.24843	5.16925	1.68761	5.90962	3.38316
SNORA16A	54.4986	70.6788	52.9762	73.2522	58.5145	117.14	74.2389	111.53	67.2002	37.9713	65.8501	44.8269
RAB42	122.383	120.345	89.3973	129.518	130.86	128.962	134.285	111.53	115.791	99.5691	104.685	132.789
TAF12	368.105	445.085	375.248	405.541	378.749	391.184	330.8	335.671	413.54	518.097	523.424	492.25
TAF12-DT	30.5957	21.0126	20.9697	14.8628	18.0863	11.8215	25.1102	16.2422	10.3385	10.1257	22.7943	27.0653
RNU11	0	0	0	0	0	0	0	0	0	0	0	0
GMEB1	318.387	302.773	379.663	325.919	307.467	305.209	412.681	423.379	346.34	292.801	286.195	283.34
LOC124904809	0	0	0	0	0	0	0	0	0	1.68761	0	0
YTHDF2	3103.55	3238.81	3412.55	3250.7	3672.58	3500.23	3504.51	3650.15	3563.68	3411.51	3534.8	3370.47
OPRD1	43.9814	72.589	26.4881	50.958	27.6614	33.3151	63.3214	62.803	86.8434	47.2531	61.6289	43.9811
EPB41	1596.71	1633.25	1828.78	1659.32	1469.25	1677.58	1533.91	1519.18	1519.76	1539.1	1552.54	1496.2
LOC124903886	2.86835	0	3.31101	9.55463	0	9.67212	6.55049	6.49686	0	1.68761	1.68846	1.69158
RPL27P4	3.82447	1.91024	0	8.49301	0	0	4.36699	2.16562	2.0677	16.8761	5.06539	0
TMEM200B	165.408	167.146	201.972	197.462	141.499	180.546	180.138	162.422	226.413	164.542	189.108	164.083
SRSF4	1597.67	1479.48	1977.78	1605.18	1512.87	1493.81	1639.81	1678.36	1322.29	1504.51	1340.64	1297.44
MECR	310.738	358.169	269.296	281.331	305.339	286.94	311.148	282.614	360.814	332.459	300.547	361.152
LOC124903887	12.4295	9.55119	2.20734	12.7395	0	8.59744	26.202	3.24843	16.5416	21.9389	13.5077	23.6821
PTPRU	4307.31	4554.96	4310.94	4878.17	5005.65	4699.58	4839.72	5141.19	5022.44	4722.78	4925.25	4683.14
LINC01756	5.7367	1.91024	1.10367	3.18488	0	4.29872	0	1.08281	0	2.53142	1.68846	4.22895
LOC107984933	0	0	0	0	0	0	0	0	0	0	0	0
LOC107984934	0	0	0	0	0	0	0	2.16562	0	0	0	0
LINC01648	0	0	0	0	0	0	0	0	0	0	0	0
LOC105378617	0	0	0	0	0	0	0	0	0	0	0	0
LOC105378618	0	0	0	0	0	0	0	0	0	0	0	0
LOC124903888	0	0	0	0	0	0	0	0	0	3.37522	0	0
MATN1	22.9468	21.0126	17.6587	25.479	14.8946	48.3606	15.2845	21.6562	19.6431	26.158	19.4173	16.9158
MATN1-AS1	36.3324	54.4418	44.1468	58.3894	43.6199	46.2112	63.3214	56.3062	53.7602	52.3159	51.4982	38.0606
LAPTM5	69.7965	64.9481	86.0863	109.347	144.69	93.4972	110.267	128.854	140.604	56.535	81.0463	78.6585
MIR4420	0	0	0	0	0	0	0	0	0	0	0	0
rna-NR_039616.1	0	0	0	0	0	0	0	0	0	0	0	0
LOC105378620	0	8.59607	2.20734	1.06163	6.3834	5.3734	6.55049	2.16562	4.1354	5.06283	2.5327	3.38316
LOC105378621	0	0	0	0	0	0	0	0	0	0	0	0
LINC01778	0	0	0	0	0	0	0	0	0	0	0	0
LOC400748	0	0	0	0	0	0	0	0	0	0	0	0
SDC3	508.654	503.347	446.987	476.67	351.087	389.034	510.938	493.762	492.113	625.26	579.987	506.628
PUM1	5670.73	5279.9	5822.97	5360.15	5519.51	5433.58	5361.58	5157.43	4766.05	4834.16	4907.52	4886.13
SNORD103A	4.78058	3.82047	6.62202	7.43138	7.4473	3.22404	4.36699	2.16562	2.0677	3.37522	4.22116	0
SNORD103B	18.1662	28.6536	18.7624	13.8011	13.8307	13.9708	20.7432	18.4078	14.4739	10.9695	7.59809	16.9158
SNORD103C	1.91223	9.55119	6.62202	9.55463	8.5112	3.22404	9.82573	7.57967	6.2031	3.37522	8.44232	5.92053
LOC107985097	2.86835	0.955119	2.20734	5.30813	3.1917	3.22404	5.45874	5.41405	1.03385	3.37522	3.37693	4.22895
LOC124904579	0	0	0	2.12325	0	0	0	0	0	0	0	0
LOC107984935	3.82447	4.77559	0	0	6.3834	16.1202	0	8.66249	1.03385	7.59425	8.44232	4.22895
NKAIN1	26.7713	46.8008	52.9762	40.3418	36.1726	32.2404	21.835	28.1531	24.8124	33.7522	27.8597	21.9905
SNRNP40	1777.42	1633.25	1429.25	1534.05	1835.23	1648.56	1535	1578.74	1819.58	1833.59	1936.67	1694.12
ZCCHC17	891.101	860.562	788.021	836.561	888.357	938.196	836.279	877.077	989.394	779.676	847.609	796.734
FABP3	1126.31	1116.53	1175.41	1114.71	1136.25	902.731	922.527	1046	866.366	680.107	694.803	692.702
LOC124903892	4.78058	7.64095	4.41468	0	0	0	13.101	6.49686	5.16925	5.06283	1.68846	3.38316
LOC105378623	0.956117	1.91024	0	0	3.1917	2.14936	0	0	0	0	0.844232	0
SERINC2	780.191	748.813	786.917	806.836	683.024	744.753	615.746	620.451	804.335	618.509	574.078	611.506
LOC124903900	37.2885	49.6662	72.8422	26.5406	22.3419	27.9417	51.3122	24.9046	41.354	21.0951	21.1058	12.6869
LOC105378625	9.56117	9.55119	22.0734	7.43138	11.7029	19.3442	5.45874	6.49686	6.2031	0	4.22116	3.38316
LOC105379772	0	0	0	0	0	0	0	0	0	0	3.37693	0
RNU6-40P	0	0	0	0	0	0	0	0	0	0	0	0
LDC1P	3.82447	3.82047	5.51835	1.06163	7.4473	17.1949	3.27524	6.49686	0	3.37522	0	0
LINC01226	0	0	3.31101	2.12325	4.2556	2.14936	8.73399	8.66249	4.1354	0.843806	3.37693	0.84579
LOC124903917	6.69282	11.4614	7.72569	9.55463	8.5112	16.1202	9.82573	31.4015	20.677	20.2513	7.59809	12.6869
LOC105378626	109.953	116.524	144.581	79.6219	87.2398	123.588	97.1656	113.695	103.385	90.2872	70.9155	93.0369
TINAGL1	4121.82	4383.04	4872.7	4388.76	3980.05	4448.1	4682.51	4813.09	5313.99	2612.42	2771.61	2670.16
HCRTR1	23.9029	34.3843	33.1101	23.3558	19.1502	10.7468	58.9544	33.5671	17.5754	18.5637	48.9655	29.6027
PEF1	917.872	960.849	843.204	796.219	838.353	914.553	846.105	863	984.225	816.804	968.334	909.224
PEF1-AS1	0	0.955119	1.10367	0	3.1917	0	0	5.41405	4.1354	4.21903	0	0
COL16A1	35.3763	43.9355	45.2505	41.4034	55.3228	32.2404	44.7617	49.8093	37.2186	27.8456	21.1058	35.5232
LOC101929444	0	0	0	0	0	0	0	0	0	0	0	0
ADGRB2	167.32	153.774	186.52	192.154	204.269	180.546	159.395	207.9	208.838	162.011	172.223	144.63
MIR4254	0	0	0	0	0	0	0	0	0	0	0	0
rna-NR_036216.1	0	0	0	0	0	0	0	0	0	0	0	0
LOC124903930	0	0	4.41468	0	0	0	0	0	0	1.68761	0	0
SPOCD1	52.5864	60.1725	60.7019	40.3418	53.195	24.7176	50.2204	42.2296	40.3201	13.5009	23.6385	23.6821
PTP4A2	10627.2	10068.9	10385.5	10222.4	10756	10701.7	10250.4	10328.9	10274.4	9702.92	10219.4	9466.93
LOC128031832	0	0	0	0	0	0	0	0	0	0	0	0
KHDRBS1	9529.61	9369.71	10376.7	9614.08	10126.2	9581.85	9529.87	10100.5	9814.34	9070.91	9862.32	9250.41
TMEM39B	312.65	303.728	284.747	273.899	234.058	285.865	286.038	270.703	241.921	292.801	222.877	246.971
MIR5585	0	0	0	0	0	0	0	0	0	0	0	0
rna-NR_049850.1	0	0	0	0	0	0	0	0	0	0	0	0
KPNA6	5736.7	5960.9	6154.07	5740.21	5468.45	5675.39	5750.24	5681.51	6126.59	5540.43	5722.2	5734.46
TXLNA	1611.06	1723.03	1417.11	1572.27	1399.03	1385.26	1589.59	1655.62	1978.79	1794.77	1839.58	1858.2
CCDC28B	243.81	148.998	211.905	209.14	194.694	246.102	192.148	259.875	212.973	252.298	199.239	195.378
IQCC	209.39	178.607	166.654	163.49	218.1	209.563	205.249	194.906	173.687	239.641	197.55	252.045
DCDC2B	20.0784	3.82047	7.72569	18.0476	6.3834	5.3734	10.9175	18.4078	8.2708	21.9389	6.75386	12.6869
TMEM234	259.108	261.702	284.747	284.516	244.697	249.326	267.478	236.053	273.97	244.704	289.572	203.835
EIF3I	4960.33	4916.95	4302.11	4815.53	4621.58	4623.27	4660.67	4727.55	4867.36	4516.05	4666.91	4340.6
MTMR9LP	91.7872	62.0827	54.0799	54.1429	47.8755	50.51	58.9544	79.0452	51.6925	43.0341	55.7193	49.0558
FAM167B	3.82447	6.68583	2.20734	0	1.0639	2.14936	1.09175	2.16562	4.1354	1.68761	3.37693	9.30369
LCK	13.3856	13.3717	27.5918	12.7395	12.7668	16.1202	13.101	12.9937	12.4062	11.8133	8.44232	3.38316
HDAC1	6938.54	7295.2	5667.35	7275.32	7111.11	6688.81	7202.26	7227.76	7433.38	7568.09	7689.27	7174.84
MARCKSL1	6222.41	6316.2	5536.01	5315.56	5315.25	5193.93	5068.99	5658.77	5969.45	5971.61	6332.58	5696.4
LOC124903949	19.1223	16.237	34.2138	42.465	23.4058	17.1949	29.4772	16.2422	28.9478	27.8456	29.5481	21.9905
LOC105378629	0.956117	1.91024	0	1.06163	2.1278	1.07468	1.09175	1.08281	0	1.68761	0	1.69158
LOC124903933	79.3577	77.3646	71.7386	70.0673	41.4921	75.2276	69.8719	56.3062	82.708	88.5996	49.8097	110.799
FAM229A	78.4016	92.6465	87.19	74.3138	75.5369	54.8087	52.4039	55.2233	75.471	69.1921	79.3578	62.5885
TSSK3	11.4734	11.4614	13.244	21.2325	6.3834	4.29872	10.9175	12.9937	5.16925	12.6571	10.975	12.6869
BSDC1	1934.22	1907.37	1975.57	2121.13	1966.09	1973.11	2231.53	2133.14	2072.87	1292.71	1485.85	1441.23
GAPDHP20	0	0	0	0	0	2.14936	0	0	0	0	0	0
LRRC37A12P	0	0	0	0	0	0	0	0	0	0	0	0
ZBTB8B	0	1.91024	6.62202	0	2.1278	0	0	0	0	0	0	0
ZBTB8A	823.216	706.788	797.954	760.124	873.462	940.345	794.793	819.688	791.929	609.228	747.145	535.385
LOC124903952	6.69282	6.68583	11.0367	5.30813	9.5751	5.3734	5.45874	3.24843	8.2708	2.53142	0.844232	4.22895
LOC102723870	14.3417	3.82047	15.4514	12.7395	8.5112	5.3734	3.27524	18.4078	31.0155	14.3447	13.5077	17.7616
ZBTB8OS	760.113	749.768	603.708	769.679	779.839	677.049	730.38	782.872	742.304	880.933	921.057	777.281
RBBP4	4806.4	4841.5	4501.87	4897.28	5137.57	4930.63	4912.87	4603.03	4945.94	5645.06	5924.82	5696.4
SYNC	43.0252	31.5189	23.1771	47.7732	29.7892	37.6138	36.0277	32.4843	35.1509	17.7199	10.975	16.9158
NHSL3	3549.11	3804.24	4931.2	3614.84	3100.21	3344.4	3060.17	3383.78	3501.65	2459.69	2455.87	2399.51
YARS1	2547.09	2277	2157.68	2104.14	2573.57	2061.24	2401.85	2403.84	2601.17	2772.75	2661.02	2416.42
S100PBP	825.129	918.824	909.424	882.211	778.775	790.965	935.628	829.433	809.504	977.127	1109.32	1103.76
FNDC5	91.7872	87.8709	90.501	99.7928	85.112	136.484	48.0369	71.4655	69.2679	140.916	145.208	135.326
LOC105378631	0	1.91024	0	0	0	0	0	2.16562	0	1.68761	0	0
HPCA	1.91223	6.68583	4.41468	2.12325	3.1917	2.14936	6.55049	4.33124	1.03385	5.90664	1.68846	5.07474
TMEM54	429.296	430.758	342.138	464.992	438.327	450.291	448.709	487.265	558.279	515.565	568.168	488.867
LOC105378632	3.82447	0	2.20734	4.2465	5.3195	0	2.1835	2.16562	4.1354	5.06283	0	0.84579
RNF19B	1605.32	1556.84	1825.47	1821.75	2091.63	1824.81	1943.31	1878.68	1956.04	1011.72	991.128	976.888
LOC107984936	5.7367	6.68583	7.72569	6.36975	0	16.1202	4.36699	4.33124	3.10155	0	6.75386	3.38316
RPL18AP4	0	0	0	0	0	0	0	0	0	0	0	0
LOC100419257	0	0.955119	0	0	0	0	0	0	1.03385	0	2.5327	1.69158
AK2	5250.04	5118.48	4776.69	5247.62	5617.39	5625.95	5180.35	5511.51	5383.26	5563.21	5901.18	5628.73
LOC124903969	0	0	0	0	0	0	0	0	0	0	0	0
LOC105378635	0	0	1.10367	0	1.0639	0	0	0	0	0	0	1.69158
AZIN2	36.3324	65.9032	68.4276	62.6359	67.0257	58.0327	56.7709	60.6374	49.6248	44.7217	54.8751	60.8969
ZNF362	414.955	558.744	513.207	362.014	422.368	406.229	346.084	439.621	486.943	594.039	591.807	638.572
TRIM62	93.6994	89.7811	75.0496	111.471	82.9842	77.377	81.8811	75.7967	82.708	98.7253	59.9405	93.0369
A3GALT2	2.86835	0.955119	5.51835	2.12325	0	1.07468	2.1835	2.16562	1.03385	1.68761	0	1.69158
PHC2	3270.88	3306.62	3372.82	3505.49	3218.3	3469.07	3645.35	3565.7	3624.68	2441.97	2480.35	2325.92
MIR3605	0	0	0	0	0	0	0	0	2.0677	0	4.22116	0.84579
rna-NR_037400.1	0	0	0	0	0	0	0	0	0	0	0	0
PHC2-AS1	2.86835	5.73071	8.82936	6.36975	9.5751	3.22404	5.45874	15.1593	4.1354	7.59425	5.06539	5.92053
ZSCAN20	168.277	161.415	130.233	133.765	165.968	148.306	151.753	155.925	140.604	230.359	222.033	230.055
CSMD2	4.78058	0.955119	4.41468	4.2465	7.4473	0	2.1835	0	4.1354	0	0.844232	1.69158
LOC124903976	0	0	0	0	0	0	0	0	0	0	0	0
HMGB4	0	0	0	0	0	0	0	0	0	0	0	0
CSMD2-AS1	0	0	0	0	0	0	0	0	0	0	0	0
C1orf94	0	0	0	0	0	0	0	0	0	0	0	0
LOC105378639	0	0	0	0	0	0	0	0	0	0	0.844232	0
LOC105378641	15.2979	4.77559	13.244	24.4174	8.5112	21.4936	10.9175	12.9937	6.2031	16.8761	5.90962	17.7616
MIR552	0	0	0	0	0	0	0	0	0	0	0	0
rna-NR_030278.1	0	0	0	0	0	0	0	0	0	0	0	0
LOC105378642	1.91223	0	0	2.12325	0	0	0	0	0	5.06283	0	0
GJB5	0	0	0	0	3.1917	6.44808	2.1835	4.33124	0	0.843806	3.37693	5.07474
GJB4	3.82447	1.91024	13.244	2.12325	13.8307	15.0455	17.468	19.4906	12.4062	6.75044	10.1308	0
GJB3	108.041	82.1402	80.5679	84.9301	76.6008	89.1985	126.643	114.778	142.671	47.2531	35.4577	21.9905
GJA4	0	0	2.20734	0	0	0	0	0	2.0677	1.68761	0	0
SMIM12	922.653	989.503	813.405	1029.78	874.526	910.254	835.187	883.574	981.123	1046.32	1116.07	965.047
DLGAP3	13.3856	16.237	13.244	10.6163	6.3834	12.8962	2.1835	10.8281	0	12.6571	16.8846	16.07
GPR199P	22.9468	25.7882	7.72569	12.7395	14.8946	12.8962	24.0185	30.3187	16.5416	27.0018	21.95	38.9063
TMEM35B	629.125	652.346	587.153	537.183	578.762	602.896	635.398	584.718	708.187	635.386	720.13	608.123
ZMYM6	697.009	563.52	667.721	726.152	694.727	707.14	752.215	651.852	597.565	780.52	835.79	710.464
LOC124903990	0	0	1.10367	2.12325	2.1278	0	0	1.08281	0	1.68761	0.844232	0
ZMYM1	1376.81	1560.66	1334.34	1676.31	1693.73	1836.63	1715.14	1460.71	1541.47	1877.47	2108.05	2056.96
EFCAB14P1	0	0	0	0	0	2.14936	0	0	0	2.53142	0	1.69158
LOC105378644	1.91223	0	2.20734	0	0	0	6.55049	4.33124	0	3.37522	0	1.69158
SFPQ	13129.4	12923.7	12197.8	14241.7	14387.1	14636.1	17305.3	17279.5	16069.1	13229.2	12824.7	13243.4
ZMYM4	1349.08	1386.83	1348.69	1379.05	1461.8	1431.47	1508.8	1236.57	1271.64	1655.55	1665.67	1727.1
LOC124900419	0	0	2.20734	1.06163	0	0	2.1835	0	0	0	0	0
RPL5P4	22.9468	22.9228	39.7321	15.9244	23.4058	27.9417	36.0277	28.1531	19.6431	23.6266	27.8597	16.07
ZMYM4-AS1	14.3417	10.5063	12.1404	3.18488	7.4473	3.22404	5.45874	4.33124	4.1354	7.59425	5.06539	15.2242
KIAA0319L	2861.66	2635.17	2955.63	2674.24	2711.88	2500.78	2603.82	2499.13	2492.61	2502.73	2507.37	2636.33
NCDN	646.335	766.005	565.079	665.639	645.787	630.837	750.031	742.808	891.179	802.459	873.78	828.874
TFAP2E-AS1	11.4734	12.4165	14.3477	8.49301	9.5751	24.7176	16.3762	19.4906	13.44	7.59425	9.28655	13.5326
TFAP2E	52.5864	71.6339	80.5679	48.8348	43.6199	61.2568	42.5782	60.6374	45.4894	85.2244	67.5386	105.724
PSMB2	3464.01	3782.27	3469.94	3631.82	3911.96	3522.8	3647.53	3787.67	4017.54	3732.15	3950.16	3700.33
LOC105378646	0	0	0	0	0	0	0	2.16562	0	0	0	0
C1orf216	579.407	538.687	402.84	451.191	417.049	515.847	531.681	489.43	569.651	551.849	532.71	521.853
CLSPN	758.201	766.005	692.001	745.261	877.718	865.118	842.83	872.745	1135.17	1176.26	1033.34	1071.62
AGO4	1042.17	937.926	1133.47	1069.06	1121.35	1096.17	1002.22	1022.17	782.624	1021	999.571	934.598
AGO1	3697.3	3858.68	4074.75	3569.19	3644.92	3728.07	3585.3	3664.23	3838.68	3927.07	3875.87	3701.18
AGO3	1721.01	1623.7	1812.23	1742.13	1799.06	1886.06	1946.59	1965.3	1667.6	1485.94	1557.61	1563.02
LOC105378647	9.56117	4.77559	16.5551	6.36975	8.5112	11.8215	12.0092	15.1593	6.2031	4.21903	6.75386	15.2242
TEKT2	0	7.64095	0	0	0	0	0	6.49686	2.0677	9.28186	5.06539	2.53737
ADPRS	1232.43	1251.21	1039.66	1233.61	1163.91	1032.77	1218.39	1231.16	1291.28	1178.8	1323.76	1294.06
COL8A2	62.1476	43.9355	66.2202	59.451	55.3228	48.3606	58.9544	62.803	100.283	45.5655	38.8347	32.14
TRAPPC3	1321.35	1330.48	1264.81	1327.03	1335.19	1275.65	1402.9	1282.05	1329.53	1356	1474.87	1325.35
MAP7D1	1455.21	1472.79	1495.47	1448.06	1457.54	1294.99	1644.17	1710.84	1897.11	1101.17	1016.46	983.654
THRAP3	5447	5005.78	5154.14	4872.86	4954.58	4553.42	4986.01	5325.26	5232.31	5989.33	5833.64	5607.59
SH3D21	1111.96	1089.79	1430.36	1105.15	977.724	1105.85	1349.4	1414.15	1178.59	572.944	521.735	621.656
EVA1B	25.8151	27.6984	36.4211	30.7871	35.1087	38.6885	37.1194	43.3124	43.4217	13.5009	31.2366	20.299
STK40	1175.07	1107.94	1339.86	1152.93	970.277	1105.85	1053.54	1329.69	1295.41	724.829	696.491	603.894
LOC124904012	68.8404	106.973	92.7083	87.0533	100.007	94.5719	87.3399	101.784	87.8772	54.0036	67.5386	55.8221
LSM10	44.9375	28.6536	71.7386	28.6639	46.8116	30.091	51.3122	54.1405	64.0987	106.32	82.7347	70.2006
LOC124904013	0	0	0	0	0	0	0	0	0	0	0	1.69158
OSCP1	46.8497	38.2047	20.9697	43.5267	21.278	19.3442	30.569	41.1468	20.677	41.3465	42.2116	32.9858
SNORA63C	0	0	1.10367	0	0	0	0	0	0	1.68761	0	0
LOC107984940	0	1.91024	0	0	0	0	0	0	2.0677	0	0	0
MRPS15	2064.26	2073.56	1732.76	1852.54	1888.42	1745.28	1660.55	1915.49	2082.17	1760.18	1943.42	1852.28
CSF3R	91.7872	102.198	102.641	152.874	77.6647	78.4517	100.441	106.115	94.0803	99.5691	94.554	126.023
LOC107984941	0	0	0	0	0	0	0	0	0	0	0	0
LOC105378648	0	0	0	0	0	0	0	0	0	1.68761	0	0
LOC124904023	0	0	0	0	0	0	0	0	0	0	0	0
GRIK3	0	0	0	0	0	0	0	0	0	0	0	0
LOC124904027	0	0	0	0	0	0	0	0	0	0	0	0
MIR4255	0	0	0	0	0	0	0	0	0	0	0	0
rna-NR_036217.1	0	0	0	0	0	0	0	0	0	0	0	0
LOC107984942	0	0	0	0	0	0	0	0	0	0	0	1.69158
LITATS1	11.4734	36.2945	15.4514	13.8011	17.0224	16.1202	10.9175	4.33124	6.2031	29.5332	25.327	17.7616
ZC3H12A	1700.93	1532.01	2005.37	1804.76	1653.3	1625.99	1566.66	1649.12	1397.76	711.328	709.155	719.767
MIR6732	0	0	1.10367	0	0	0	0	0	0	0	0	0
rna-NR_106790.1	0	0	0	0	0	0	0	0	0	0	0	0
MEAF6	1334.74	1406.89	1342.06	1301.55	1310.73	1255.23	1324.29	1317.78	1263.36	1205.8	1273.1	1209.48
MIR5581	0	0	0	0	0	0	0	0	0	0	0	0
rna-NR_049844.1	0	0	0	0	0	0	0	0	0	0	0	0
LOC105378649	0.956117	0.955119	4.41468	0	3.1917	4.29872	7.64224	0	0	1.68761	0	2.53737
SNIP1	585.143	715.384	709.66	571.155	703.238	649.107	742.389	721.152	659.596	567.881	563.947	510.857
FTH1P1	12.4295	10.5063	8.82936	14.8628	3.1917	5.3734	6.55049	7.57967	11.3723	3.37522	7.59809	3.38316
DNALI1	26.7713	35.3394	17.6587	14.8628	18.0863	19.3442	54.5874	19.4906	18.6093	37.9713	14.3519	40.5979
GNL2	4466.02	4368.71	4063.71	4504.48	4679.03	4736.12	5123.57	4750.29	4816.71	3986.98	4212.72	3699.49
RSPO1	0	0	0	0	0	0	0	0	1.03385	0	1.68846	0
AIRIM	1606.28	1616.06	1319.99	1750.62	1757.56	1674.35	1773	1761.73	1567.32	1653.86	1784.71	1783.77
CDCA8	1471.46	1360.09	1400.56	1544.67	1514.99	1578.71	1384.34	1531.09	1550.77	1456.41	1474.03	1518.19
EPHA10	514.391	577.847	371.937	505.334	369.173	443.843	401.763	402.806	420.777	453.124	437.312	463.493
LOC124904835	0.956117	0.955119	0	2.12325	0	0	2.1835	2.16562	0	0	0	0
LOC105378650	0	0	0	0	0	2.14936	1.09175	0	0	0	0	0
ACTN4P2	3.82447	0	0	2.12325	8.5112	4.29872	0	0	0	0	0	0
LOC100129497	0	0	0	0	2.1278	0	0	0	4.1354	0	0	0
MANEAL	2873.13	2936.03	2359.65	2561.7	2359.73	2684.55	2393.11	2455.81	2939.24	3154.99	3059.5	3151.41
YRDC	1294.58	1318.06	1577.15	1717.71	1862.89	1778.6	1764.27	1777.98	1517.69	1071.63	1227.51	1080.92
C1orf122	911.179	988.548	952.468	900.259	790.478	876.939	991.307	999.434	1331.6	954.344	989.44	1016.64
MTF1	1012.53	1142.32	1069.46	961.833	992.619	1047.81	1091.75	1061.15	1060.73	854.775	839.167	885.542
INPP5B	1087.1	1155.69	1259.29	1232.55	1076.67	1172.48	1027.34	1075.23	1048.32	940.843	850.986	883.005
LOC124904043	5.7367	19.1024	17.6587	2.12325	7.4473	9.67212	17.468	20.5734	11.3723	6.75044	5.06539	3.38316
LOC105378651	0	1.91024	5.51835	0	0	9.67212	3.27524	4.33124	5.16925	2.53142	0.844232	5.07474
SF3A3	3193.43	3297.07	2679.71	3021.39	3230	2958.59	3258.87	3061.11	3405.5	3699.24	3717.15	3354.4
RNU6-510P	4.78058	5.73071	18.7624	6.36975	11.7029	6.44808	20.7432	14.0765	8.2708	5.90664	6.75386	2.53737
FHL3	350.895	381.092	491.133	377.939	267.039	336.375	397.396	320.512	433.183	239.641	217.812	191.994
UTP11	1754.47	1876.81	1695.24	1736.82	1892.68	1990.31	2020.83	1931.73	1861.96	1773.68	1711.26	1688.2
POU3F1	0	1.91024	2.20734	2.12325	0	0	0	2.16562	0	5.06283	3.37693	1.69158
MIR3659HG	0	0	0	0	0	0	0	0	0	1.68761	6.75386	0
MIR3659	0	0	0	0	0	0	0	0	0	0	0	0
rna-NR_037432.1	0	0	0	0	0	0	0	0	0	0	0	0
LINC02786	0	0	0	0	0	0	0	0	0	0	0	0
LOC105378654	0	0	0	0	0	0	0	0	0	0	0	0
LINC01343	0	0	0	0	0	0	0	0	0	0	0	0
LOC105378657	0	0	0	0	0	0	0	0	0	0	0	0
LOC107984943	0	0	0	0	0	0	0	1.08281	0	0	0	0
LINC01685	0	0	0	0	0	0	0	0	0	0	0	0
LOC105378658	0	0	0	0	0	0	0	0	0	0	0	0
LOC105378660	0	0	0	0	0	0	0	0	0	0	0	0
HSPA5P1	5.7367	0	6.62202	6.36975	6.3834	2.14936	13.101	8.66249	6.2031	11.8133	6.75386	16.9158
RRAGC	998.186	982.817	1131.26	1091.35	1075.6	1118.74	1232.58	1206.25	1219.94	1021	1043.47	1043.71
RRAGC-DT	3.82447	1.91024	8.82936	2.12325	7.4473	5.3734	3.27524	2.16562	8.2708	2.53142	0	0
MYCBP	0	0	0	0	2.1278	0	0	3.24843	0	0	0	2.53737
GJA9-MYCBP	2.86835	0	1.10367	0	0	7.52276	0	0	0	1.68761	0	8.4579
GJA9	0	0	0	0	0	0	0	0	0	0	0	0
RHBDL2	0	2.86536	1.10367	0	0	4.29872	3.27524	2.16562	1.03385	5.06283	2.5327	0
LOC105378662	1.91223	0	4.41468	1.06163	1.0639	0	0	2.16562	2.0677	1.68761	0	0
EIF1P2	0	0	0	0	0	0	0	0	0	0	0	0
AKIRIN1	6733.93	6435.59	6785.37	6379.31	6880.24	6670.54	7362.75	7188.78	6836.85	4547.27	5144.75	4581.65
NDUFS5	3397.08	3664.79	3082.55	2597.8	2667.2	2823.18	2821.08	3349.13	3570.92	2706.93	2920.2	2540.75
LOC124904088	26.7713	25.7882	16.5551	8.49301	2.1278	7.52276	15.2845	15.1593	29.9816	21.9389	14.3519	26.2195
MACF1	7513.16	7198.73	8981.67	7611.86	7765.41	7430.34	8093.13	8533.63	7582.25	6325.17	6498.9	6121.83
HSPE1P8	5.7367	1.91024	8.82936	4.2465	2.1278	1.07468	4.36699	6.49686	10.3385	3.37522	3.37693	0
LOC124904101	4.78058	19.1024	8.82936	1.06163	8.5112	21.4936	6.55049	5.41405	6.2031	4.21903	10.975	10.1495
BMP8A	782.103	747.858	709.66	903.443	722.388	771.62	672.517	721.152	771.252	767.019	756.432	656.333
OXCT2P1	10.5173	18.1473	14.3477	31.8488	28.7253	6.44808	10.9175	9.7453	11.3723	10.1257	10.1308	28.7569
PPIEL	21.0346	31.5189	24.2807	15.9244	15.9585	17.1949	14.1927	37.8984	12.4062	18.5637	10.975	21.1448
PABPC4	4781.54	4767	5106.68	5154.19	4942.88	4985.44	5198.91	5343.67	5401.87	4688.18	4816.34	4602.79
PABPC4-AS1	83.1821	85.0056	75.0496	92.3614	65.9618	78.4517	112.45	81.2108	66.1664	71.7235	62.4732	98.9574
SNORA55	33.4641	41.0701	39.7321	37.1569	26.5975	55.8834	62.2297	32.4843	40.3201	41.3465	39.6789	29.6027
HEYL	139.593	114.614	142.373	143.319	125.54	160.127	176.863	133.186	144.739	191.544	167.158	153.088
NT5C1A	3.82447	5.73071	2.20734	9.55463	8.5112	0	8.73399	4.33124	4.1354	6.75044	8.44232	10.1495
HPCAL4	101.348	100.287	86.0863	112.532	80.8564	85.9744	86.2481	97.453	85.8095	38.8151	35.4577	39.7521
LOC100128091	0	0	0	0	0	0	0	0	0	0	0	0
PPIE	1426.53	1447.96	1196.38	1261.21	1421.37	1341.2	1379.97	1352.43	1530.1	1643.73	1593.07	1552.87
BMP8B	1205.66	1202.49	1099.26	1195.39	1235.19	1202.57	1216.21	973.447	1018.34	1179.64	1169.26	1068.23
OXCT2	80.3138	83.0953	91.6046	91.2998	84.0481	99.9453	78.6059	95.2873	51.6925	87.7558	91.1771	137.864
BMP8B-AS1	20.0784	23.878	34.2138	15.9244	8.5112	25.7923	17.468	22.739	13.44	26.158	10.1308	32.9858
LOC101929536	15.2979	24.8331	15.4514	26.5406	8.5112	23.643	15.2845	15.1593	16.5416	18.5637	5.90962	11.8411
LOC130932201	22.9468	18.1473	25.3844	16.986	27.6614	19.3442	32.7524	28.1531	28.9478	21.0951	37.9904	27.9111
LINC02811	1.91223	0	3.31101	2.12325	0	1.07468	1.09175	4.33124	0	3.37522	0	1.69158
LOC105378667	3.82447	10.5063	1.10367	0	1.0639	0	0	4.33124	0	1.68761	3.37693	2.53737
TRIT1	1260.16	1307.56	1061.73	1252.72	1160.72	1188.6	1153.98	1230.07	1152.74	1327.31	1483.32	1417.54
MYCL-AS1	4.78058	12.4165	8.82936	5.30813	6.3834	27.9417	16.3762	4.33124	8.2708	6.75044	6.75386	7.61211
MYCL	293.528	337.157	359.797	321.673	317.042	233.206	284.946	356.245	324.629	397.432	470.237	314.634
MFSD2A	2456.26	2533.93	2541.75	3002.28	2514	2893.04	2593.99	3106.58	2421.28	1575.39	1744.18	1552.87
RPS2P12	43.9814	25.7882	55.1835	48.8348	39.3643	36.5391	38.2112	38.9812	23.7785	25.3142	29.5481	20.299
LOC105378669	13.3856	17.1921	38.6285	39.2802	35.1087	24.7176	17.468	30.3187	14.4739	19.4075	45.5885	32.14
CAP1	5637.26	5481.43	4746.89	5454.63	5461	5286.35	5678.18	5737.81	6154.51	5208.81	5484.13	5052.75
PPT1	5656.39	5595.08	5061.43	5011.93	5695.06	5269.16	5612.68	5255.96	6224.81	6081.31	6541.11	6137.9
OAZ1P1	3.82447	0	0	0	0	0	0	0	0	0	0	0
LOC105378671	0.956117	5.73071	2.20734	6.36975	2.1278	1.07468	3.27524	1.08281	0	1.68761	0	3.38316
RLF	5358.08	4653.34	5815.24	5522.58	5999.33	5503.44	4905.23	4987.43	3995.83	3618.24	4370.59	3918.55
TMCO2	0	0	0	0	0	0	0	4.33124	0	0.843806	1.68846	3.38316
ZMPSTE24	4144.77	4156.68	3594.65	3779.39	4019.42	4269.7	3785.09	3629.58	3968.95	4261.22	4960.71	4407.41
COL9A2	31.5518	60.1725	67.3239	35.0336	70.2174	62.3315	73.1471	67.1343	52.7263	57.3788	43.0558	47.3642
SMAP2	302.133	394.464	317.857	268.591	270.231	260.073	250.01	310.767	284.309	299.551	284.506	319.709
ZFP69B	74.5771	85.9607	96.0193	78.5603	89.3676	92.4225	89.5234	111.53	80.6403	145.978	146.052	175.924
ZFP69	88.9188	109.839	54.0799	142.258	147.882	135.41	128.826	107.198	125.096	175.512	165.469	151.396
EXO5-DT	15.2979	34.3843	11.0367	16.986	9.5751	25.7923	21.835	21.6562	8.2708	14.3447	18.5731	29.6027
EXO5	135.769	170.966	125.818	144.381	169.16	123.588	172.496	177.581	193.33	278.456	195.862	213.139
LOC124904149	0	0	0	0	0	0	0	0	0	1.68761	0	0
ZNF684	73.621	66.8583	48.5615	52.0197	109.582	89.1985	135.377	101.784	75.471	151.041	124.102	116.719
LOC100328982	0	0	0	0	0	0	0	0	0	0	0	1.69158
LOC105378673	0	0	0	0	0	0	0	0	0	0	0	0.84579
RIMS3	142.461	141.358	97.123	125.272	157.457	184.845	165.946	125.606	148.874	189.012	173.912	197.069
LOC105378675	0	3.82047	2.20734	0	0	0	0	0	5.16925	0	5.06539	0
NFYC-AS1	28.6835	49.6662	38.6285	49.8964	64.8979	52.6593	69.8719	16.2422	57.8956	52.3159	65.0059	83.7332
NFYC	769.674	790.838	869.692	776.048	841.545	689.945	637.581	747.139	780.557	865.745	770.784	773.052
MIR30E	0	0	0	0	0	0	0	0	0	0	0	1.69158
rna-NR_029846.1	0	0	0	0	0	0	0	0	0	0	0	0
MIR30C1	0	0	0	0	0	0	0	0	2.0677	2.53142	0	0.84579
rna-NR_029833.1	0	0	0	0	0	0	0	0	0	0	0	0
KCNQ4	56.4109	114.614	91.6046	67.944	46.8116	72.0036	48.0369	106.115	79.6064	71.7235	99.6194	85.4248
LOC105378676	0	0	0	0	0	0	0	0	0	0	0	0
CITED4	336.553	357.214	285.851	262.222	271.295	325.628	245.643	382.232	467.3	343.429	341.07	356.923
LOC124904157	1.91223	1.91024	0	0	2.1278	2.14936	6.55049	0	1.03385	5.90664	0	0.84579
CTPS1	2189.51	2380.16	2133.39	2146.61	2267.17	2512.6	2793.78	2679.96	2863.76	3018.29	2879.68	2715.83
SLFNL1-AS1	55.4548	46.8008	51.8725	38.2185	32.9809	51.5847	62.2297	54.1405	45.4894	54.8474	48.9655	42.2895
SLFNL1	21.9907	12.4165	27.5918	24.4174	13.8307	27.9417	28.3855	32.4843	27.9139	28.6894	13.5077	21.9905
SCMH1	1024.96	895.901	972.334	1008.54	957.51	961.839	899.601	943.128	880.84	1006.66	1015.61	1097.84
RPL23AP17	0.956117	1.91024	4.41468	2.12325	0	0	0	0	4.1354	6.75044	3.37693	6.76632
SCMH1-DT	4.78058	1.91024	11.0367	6.36975	4.2556	10.7468	0	5.41405	9.30465	4.21903	4.22116	0.84579
RPL36AP9	0	0	0	0	0	0	0	0	0	0	0	0
LOC124904158	0	0	0	0	0	0	0	0	0	0	0	0
LOC124904159	0	0	0	0	0	0	0	0	0	0	0	0
FOXO6	0	0	0	0	0	0	0	0	0	0	0	0
FOXO6-AS1	0	0	0	0	0	0	0	0	0	0	0	0
LOC105378678	0	0.955119	0	0	0	0	0	0	0	0	0	0
EDN2	1.91223	0	2.20734	0	2.1278	0	7.64224	4.33124	6.2031	4.21903	0	0
HIVEP3	18.1662	33.4292	24.2807	22.2941	39.3643	23.643	58.9544	69.2999	53.7602	27.8456	27.8597	18.6074
LOC128125817	0	0	0	0	0	0	0	0	0	0	0	0
LOC124904160	0	0	0	0	0	0	0	0	0	0	0	0
LOC124904161	0	0	0	0	0	0	0	0	0	0	0	0
GUCA2B	37.2885	48.711	36.4211	76.4371	36.1726	27.9417	63.3214	68.2171	45.4894	23.6266	28.7039	20.299
GUCA2A	898.75	821.402	948.053	903.443	822.395	984.407	1015.33	1247.4	1393.63	485.188	489.655	448.269
FOXJ3	5424.05	5339.11	6421.15	5880.34	5558.88	5948.35	5894.35	5775.71	5178.55	4200.46	4072.58	3934.62
RIMKLA	1861.56	1974.23	1918.18	1643.4	1588.4	1450.82	1307.91	1210.58	1240.62	1847.93	1996.61	1908.1
RPS15AP8	7.64893	3.82047	4.41468	2.12325	2.1278	6.44808	0	1.08281	6.2031	0	7.59809	5.07474
ZMYND12	27.7274	47.7559	39.7321	45.6499	22.3419	39.7632	36.0277	32.4843	28.9478	27.0018	48.1212	31.2942
CCDC30	15.2979	17.1921	24.2807	0	17.0224	11.8215	13.101	6.49686	10.3385	22.7828	21.95	12.6869
PPCS	824.173	813.761	740.563	834.438	746.858	735.081	733.655	813.191	792.963	899.497	1024.05	1024.25
TMSB4XP1	5.7367	0	0	0	0	0	0	0	0	0	0	0
RNU6-536P	0	0	0	0	0	0	0	0	0	0	0.844232	0
LOC124904162	17.2101	15.2819	20.9697	16.986	13.8307	17.1949	33.8442	18.4078	18.6093	10.9695	11.8192	14.3784
PPIH	617.651	559.699	482.304	535.059	666.002	588.925	649.59	610.705	682.341	653.949	554.66	579.366
YBX1	9632.88	10059.3	9495.98	9340.18	10123	9534.56	10044.1	10694.9	11503.6	9675.07	9950.96	9071.95
CLDN19	404.437	449.861	464.645	515.95	452.158	424.499	410.497	514.335	535.534	342.585	422.116	395.83
P3H1	773.498	869.158	652.269	715.536	883.037	742.604	845.013	805.611	915.991	1114.67	1025.74	1069.92
C1orf50	418.779	522.45	484.511	468.177	428.752	366.466	374.47	415.799	404.235	510.502	533.555	474.488
TMEM269-DT	0	0	4.41468	10.6163	3.1917	1.07468	0	3.24843	6.2031	10.1257	0	5.07474
TMEM269	11.4734	25.7882	20.9697	31.8488	15.9585	7.52276	18.5597	22.739	29.9816	13.5009	27.0154	21.9905
LOC107984946	1.91223	8.59607	0	4.2465	9.5751	3.22404	6.55049	4.33124	9.30465	1.68761	5.06539	3.38316
SVBP	341.334	345.753	261.57	335.474	372.365	349.271	348.268	432.041	376.321	356.93	387.503	332.396
ERMAP	324.124	349.573	357.589	360.953	329.809	288.014	290.405	284.779	279.139	322.334	346.979	382.297
LOC124904163	20.0784	0.955119	14.3477	8.49301	18.0863	35.4644	6.55049	15.1593	21.7108	17.7199	19.4173	35.5232
ZNF691-DT	1.91223	0	1.10367	0	0	0	0	4.33124	1.03385	1.68761	3.37693	1.69158
ZNF691	188.355	181.473	211.905	136.95	153.202	156.903	172.496	123.44	140.604	251.454	189.108	263.887
LOC339539	0	0	0	0	0	0	0	0	0	0	0	1.69158
LOC100420252	0	0	0	0	0	0	0	0	2.0677	0	0	0
ATP6V1E1P1	1.91223	1.91024	2.20734	6.36975	8.5112	4.29872	6.55049	4.33124	2.0677	3.37522	0	9.30369
SLC2A1	87857.6	81818.3	89128	84624.3	80017	82725.7	72391.6	84784.1	81620.4	51848.5	62328	50419.2
SLC2A1-DT	58.3231	47.7559	52.9762	47.7732	81.9203	34.3898	66.5966	76.8796	69.2679	43.8779	50.6539	31.2942
RNU6-880P	0	0	0	0	0	0	0	0	0	0.843806	0	0
LOC124904715	0	0	0	0	0	0	0	0	0	0	0	0
CFAP144	21.9907	27.6984	25.3844	8.49301	35.1087	31.1657	13.101	21.6562	25.8462	17.7199	16.8846	24.5279
EBNA1BP2	2357.78	2377.29	1686.41	2052.12	2119.29	2348.18	2410.58	2467.73	2685.94	2571.92	2715.89	2277.71
MIR6733	0	0	0	0	2.1278	2.14936	0	0	0	0	0	0
rna-NR_106791.1	0	0	0	0	0	0	0	0	0	0	0	0
CFAP57	6.69282	9.55119	9.93303	23.3558	7.4473	11.8215	26.202	28.1531	25.8462	6.75044	15.1962	24.5279
LOC105378685	1.91223	3.82047	25.3844	19.1093	7.4473	11.8215	7.64224	10.8281	2.0677	15.1885	5.90962	13.5326
LOC124904164	1.91223	7.64095	2.20734	16.986	8.5112	19.3442	1.09175	9.7453	7.23695	5.90664	6.75386	16.9158
TMEM125	826.085	827.133	812.301	917.245	908.571	712.513	862.481	785.038	936.668	851.4	896.574	828.874
C1orf210	449.375	373.451	443.676	450.129	348.959	311.657	320.974	342.168	324.629	318.115	319.964	358.615
TIE1	0	7.64095	5.51835	6.36975	0	5.3734	17.468	0	2.0677	2.53142	0	3.38316
MPL	17.2101	18.1473	51.8725	45.6499	35.1087	19.3442	28.3855	22.739	39.2863	22.7828	30.3924	25.3737
CDC20-DT	20.0784	16.237	7.72569	13.8011	26.5975	15.0455	25.1102	18.4078	18.6093	16.0323	12.6635	4.22895
CDC20	1492.5	1508.13	1403.87	1471.41	1643.73	1575.48	1581.94	1812.63	2148.34	1892.66	1782.17	1760.94
ELOVL1	1783.16	1794.67	1706.27	1845.11	1616.06	1821.58	1909.47	1619.88	1967.42	1549.23	1728.14	1378.64
MIR6734	0	0	0	0	0	0	0	0	0	0	0	0
rna-NR_106792.1	0	0	0	0	0	0	0	0	0	0	0	0
LOC112268225	38.2447	66.8583	77.2569	41.4034	34.0448	62.3315	82.9729	73.6311	42.3878	77.6301	58.252	30.4484
MED8	1517.36	1376.33	1217.35	1383.3	1432.01	1431.47	1386.52	1446.64	1398.8	1321.4	1387.92	1180.72
MED8-AS1	19.1223	20.0575	9.93303	20.1709	12.7668	16.1202	18.5597	30.3187	9.30465	16.8761	18.5731	8.4579
SZT2	776.367	740.217	744.978	702.796	673.449	646.957	732.563	714.655	739.203	891.902	757.276	884.696
SZT2-AS1	0	0	0	0	0	0	0	0	0	0	0	0
MIR6735	0	0	0	0	0	0	0	0	0	0	0	0
rna-NR_106793.1	0	0	0	0	0	0	0	0	0	0	0	0
HYI	0	0	0	0	0	0	0	0	0	0	0	0
HYI-AS1	0	0	0	0	0	1.07468	0	0	0	0.843806	0	0
PTPRF	14461.3	14220.8	14774.8	14951.9	15121.2	14642.5	15204.8	16007.2	16830	14703.3	14648.3	13642.6
KDM4A	1279.28	1277.95	1368.55	1394.98	1300.09	1284.24	1112.49	1275.55	1173.42	1264.86	1242.71	1256
LOC124904165	14.3417	22.9228	26.4881	7.43138	10.639	17.1949	8.73399	25.9875	9.30465	9.28186	8.44232	16.07
KDM4A-AS1	17.2101	24.8331	25.3844	14.8628	25.5336	22.5683	27.2937	19.4906	11.3723	26.158	35.4577	19.4532
ST3GAL3	73.621	45.8457	64.0129	52.0197	45.7477	31.1657	49.1287	41.1468	75.471	61.5978	51.4982	58.3595
ST3GAL3-AS1	5.7367	0.955119	1.10367	2.12325	0	1.07468	0	0	0	1.68761	0.844232	5.07474
LOC124904721	0	0	0	0	4.2556	0	0	0	0	1.68761	0.844232	0
LOC124904166	0	0	0	1.06163	0	0	0	0	0	1.68761	0.844232	0
MIR6079	0	0	0	0	0	0	0	0	0	0	0.844232	0
rna-NR_106727.1	0	0	0	0	0	0	0	0	0	0	0	0
ARTN	3.82447	13.3717	17.6587	12.7395	2.1278	10.7468	6.55049	0	5.16925	20.2513	5.90962	10.9953
LINC02918	11.4734	6.68583	8.82936	1.06163	8.5112	0	2.1835	0	15.5077	11.8133	8.44232	9.30369
LOC101929609	9.56117	9.55119	2.20734	8.49301	6.3834	0	1.09175	9.7453	14.4739	6.75044	6.75386	15.2242
IPO13	608.09	543.462	451.401	424.65	464.924	484.681	534.957	408.22	502.451	681.795	676.23	661.408
DPH2	1721.97	1758.37	1349.79	1591.38	1351.15	1642.11	1629.98	1587.4	1900.22	1892.66	1832.83	1913.18
LOC124904167	12.4295	10.5063	4.41468	7.43138	9.5751	5.3734	15.2845	6.49686	10.3385	13.5009	16.8846	5.92053
ATP6V0B	4657.24	4732.61	4228.16	4649.92	4241.77	4605	4337.52	4436.28	5169.25	3532.17	4119.01	3889.79
B4GALT2	1958.13	1956.08	1648.88	1859.97	1953.32	1751.73	1752.26	1741.16	2224.84	2273.21	2325.02	2177.91
CCDC24	185.487	186.248	141.27	219.757	185.119	174.098	227.084	163.504	180.924	144.291	163.781	168.312
SLC6A9	78.4016	92.6465	92.7083	81.7452	63.834	35.4644	77.5141	70.3827	103.385	74.2549	70.9155	71.8922
LOC107984948	6.69282	9.55119	5.51835	2.12325	8.5112	8.59744	1.09175	4.33124	4.1354	8.43806	10.975	8.4579
LOC124904168	0	0	0	1.06163	0	4.29872	0	4.33124	3.10155	3.37522	1.68846	0
KLF17	0	0	0	0	0	0	0	0	0	0	0	1.69158
LOC124904169	0	0	0	0	0	0	0	0	6.2031	0	0	0
KRT8P47	13.3856	9.55119	11.0367	2.12325	6.3834	6.44808	2.1835	0	8.2708	1.68761	3.37693	8.4579
LOC100129492	3.82447	1.91024	6.62202	2.12325	0	0	4.36699	2.16562	6.2031	3.37522	3.37693	1.69158
KLF18	0	0	0	0	0	0	6.55049	0	0	3.37522	0	0
LOC124904170	0	0	0	0	0	0	0	0	0	0	0	0
DMAP1	555.504	548.238	495.548	466.054	472.372	513.697	508.755	513.252	693.713	798.24	634.018	597.974
ERI3	1126.31	1140.41	863.07	1058.44	1024.54	991.93	1009.87	990.772	1238.55	1086.82	1199.65	1126.59
ERI3-IT1	9.56117	16.237	13.244	14.8628	7.4473	8.59744	2.1835	7.57967	5.16925	9.28186	12.6635	12.6869
SNORA110	0	1.91024	1.10367	2.12325	0	1.07468	0	0	0	1.68761	0	0
RNF220	1756.39	1531.06	1557.28	1578.64	1482.01	1529.27	1624.52	1658.87	1799.93	1860.59	1769.51	1741.48
MIR5584	0	0	0	0	0	0	0	0	0	0	0	0
rna-NR_049849.1	0	0	0	0	0	0	0	0	0	0	0	0
LOC107984950	89.875	112.704	131.337	77.4987	96.8149	104.244	149.57	102.867	107.52	99.5691	99.6194	125.177
TMEM53	59.2792	56.352	52.9762	89.1766	37.2365	74.1529	42.5782	66.0515	73.4033	71.7235	69.227	60.8969
SNORD145	0	2.86536	0	1.06163	1.0639	0	1.09175	1.08281	0	0	0	0.84579
ARMH1	13.3856	11.4614	6.62202	13.8011	6.3834	15.0455	19.6515	12.9937	17.5754	8.43806	6.75386	20.299
LOC105378690	0	0.955119	0	0	0	0	0	0	1.03385	0	0.844232	3.38316
RNU5F-1	10.5173	4.77559	8.82936	3.18488	1.0639	3.22404	3.27524	6.49686	2.0677	5.90664	11.8192	3.38316
RNU5D-1	6.69282	6.68583	4.41468	9.55463	3.1917	7.52276	8.73399	8.66249	4.1354	5.06283	5.06539	9.30369
KIF2C	2533.71	2414.54	2089.25	2445.99	2688.48	2693.15	2710.81	2767.66	3018.84	2839.41	2813.83	2799.57
SNORD160	5.7367	2.86536	5.51835	7.43138	9.5751	2.14936	7.64224	3.24843	7.23695	1.68761	2.5327	2.53737
RPS8	71488.8	67216.5	68009.3	69964.3	70310	71206.2	64499.4	69817.5	66056.8	53706.5	56794.9	51249
SNORD55	206.521	212.991	227.356	227.188	175.544	224.608	191.056	250.129	225.379	114.758	151.962	131.097
SNORD46	103.261	153.774	129.129	128.457	157.457	119.29	147.386	129.937	160.247	95.35	86.9559	93.8827
SNORD38A	13.3856	23.878	19.8661	31.8488	25.5336	27.9417	26.202	27.0703	24.8124	13.5009	16.0404	19.4532
SNORD38B	56.4109	57.3071	77.2569	83.8684	82.9842	90.2731	84.0646	116.944	75.471	65.8168	59.0962	76.1211
RPS15AP11	19.1223	25.7882	19.8661	20.1709	42.556	35.4644	20.7432	79.0452	46.5232	48.0969	27.0154	54.1306
BEST4	23.9029	14.3268	9.93303	19.1093	15.9585	12.8962	29.4772	10.8281	18.6093	16.0323	9.28655	8.4579
PLK3	2872.17	2576.91	3764.62	3084.02	2698.05	2887.67	2739.2	3186.71	2576.35	780.52	791.89	788.276
DYNLT4	160.628	120.345	257.155	171.983	139.371	217.085	180.138	233.887	188.161	53.1598	50.6539	71.8922
BTBD19	173.057	207.261	316.753	263.283	237.25	266.521	362.46	395.226	300.85	88.5996	81.0463	71.8922
PTCH2	43.0252	28.6536	33.1101	32.9104	25.5336	19.3442	26.202	54.1405	17.5754	22.7828	21.95	16.07
LOC107984952	5.7367	5.73071	2.20734	2.12325	6.3834	4.29872	3.27524	7.57967	3.10155	0	1.68846	0
EIF2B3	1216.18	1216.82	945.846	1116.83	1110.71	1144.53	1099.39	1075.23	1107.25	1204.11	1334.73	1210.33
PPIAP35	19.1223	21.0126	7.72569	6.36975	19.1502	10.7468	10.9175	7.57967	7.23695	12.6571	15.1962	30.4484
MRPS17P1	6.69282	15.2819	0	8.49301	6.3834	16.1202	16.3762	8.66249	9.30465	6.75044	10.975	17.7616
HECTD3	1124.39	913.093	906.113	932.107	981.98	993.005	884.316	979.944	1148.61	1226.89	1214.01	1186.64
UROD	1622.53	1764.1	1163.27	1460.8	1386.26	1324.01	1264.24	1466.13	1639.69	1705.33	1798.21	1643.37
ZSWIM5	62.1476	74.4992	100.434	77.4987	80.8564	87.0491	74.2389	53.0577	85.8095	114.758	95.3982	108.261
LOC105378691	7.64893	6.68583	2.20734	2.12325	2.1278	0	2.1835	17.325	3.10155	2.53142	4.22116	1.69158
LINC01144	21.9907	32.474	28.6954	16.986	25.5336	23.643	41.4864	21.6562	22.7447	1.68761	15.1962	23.6821
HPDL	4621.87	4667.66	3714.95	4751.84	4576.9	4073.04	4639.93	4735.13	5347.07	5586.84	5685.06	5660.87
MUTYH	892.057	989.503	1049.59	940.6	801.117	919.926	922.527	981.026	975.954	886.84	886.444	1000.57
TOE1	928.389	1049.68	774.777	982.004	939.424	914.553	1001.13	1033	1111.39	1288.49	1384.54	1211.17
TESK2	855.724	759.319	1027.52	986.25	860.695	858.669	838.463	892.236	720.593	614.29	606.159	591.207
LOC124904849	0	0	1.10367	0	0	3.22404	1.09175	2.16562	0	0	0	0
CCDC163	60.2353	38.2047	41.9395	65.8208	87.2398	80.601	62.2297	85.542	66.1664	61.5978	60.7847	62.5885
MMACHC	303.089	335.247	306.82	286.639	196.822	254.699	290.405	327.009	344.272	395.745	374.839	315.48
PRDX1	16274.1	16212.2	13281.6	15998.7	16926.7	16734.9	15760.5	16185.9	16744.2	15172.5	15813.3	15175.2
AKR1A1	3200.12	2948.45	2946.8	2915.22	3167.23	2828.56	2892.04	2952.82	3072.6	2767.68	3141.39	2857.92
NASP	2049.91	2195.82	1936.94	1999.04	2115.03	2077.36	1976.06	2370.27	2501.92	2374.47	2239.75	2066.27
CCDC17	35.3763	42.9803	26.4881	38.2185	27.6614	47.2859	57.8627	58.4718	44.4555	30.377	28.7039	33.8316
GPBP1L1	4111.3	3856.77	4632.1	4297.46	4449.23	4247.14	3887.72	4342.07	3692.91	3203.93	3433.49	3369.63
RPS15AP10	11.4734	5.73071	22.0734	24.4174	4.2556	21.4936	16.3762	4.33124	11.3723	6.75044	10.975	23.6821
RPL7AP16	40.1569	21.0126	52.9762	13.8011	11.7029	23.643	31.6607	27.0703	38.2524	19.4075	15.1962	18.6074
TMEM69	1178.89	1069.73	1254.87	1248.47	1303.28	1287.47	1126.68	1119.63	1045.22	985.565	1056.13	1080.07
IPP	374.798	446.04	419.395	458.622	436.199	466.411	370.103	358.41	383.558	500.377	527.645	621.656
LOC105378693	0	3.82047	0	2.12325	0	2.14936	4.36699	1.08281	0	1.68761	0	0.84579
MAST2	1795.59	1835.74	2240.45	1807.95	1878.85	2050.49	2095.06	2256.58	2160.75	1818.4	1694.37	1575.71
TMA16P2	15.2979	21.0126	17.6587	22.2941	23.4058	32.2404	10.9175	22.739	9.30465	10.9695	11.8192	13.5326
LOC105378694	9.56117	20.0575	34.2138	24.4174	21.278	29.0164	21.835	11.9109	12.4062	8.43806	10.975	17.7616
PIK3R3	18.1662	42.0252	26.4881	24.4174	28.7253	36.5391	16.3762	27.0703	19.6431	29.5332	19.4173	61.7427
P3R3URF-PIK3R3	0	0	0	0	0	0	0	0	0	0	0	0
LOC124904171	0	0	3.31101	0	0	0	1.09175	0	1.03385	0	0	2.53737
LOC101929626	0	0	0	0	0	0	0	0	3.10155	0	0	1.69158
TSPAN1	104.217	55.3969	80.5679	84.9301	111.71	76.3023	109.175	106.115	56.8617	49.7845	63.3174	65.9716
P3R3URF	0	0	0	0	0	0	0	0	0	0	0	0
POMGNT1	1833.83	1772.7	1648.88	1995.86	1638.41	1795.79	1824.31	1832.12	2030.48	1815.87	1810.03	1914.87
LURAP1	0	0	0	0	0	0	0	1.08281	1.03385	1.68761	0	3.38316
RAD54L	523.952	549.193	590.464	614.681	542.589	684.571	616.838	654.018	625.479	739.174	665.255	654.642
LRRC41	3769.01	3906.43	3588.03	3925.89	3631.09	3836.61	3765.44	3685.89	3793.2	3981.07	3879.25	3772.22
UQCRH	7151.75	6942.76	5905.74	5847.43	5969.54	6030.03	5487.13	6858.52	6864.76	5602.03	5747.53	5298.88
NSUN4	1207.58	1274.13	1261.5	1068	1202.21	1141.31	1086.29	1172.68	1204.44	1256.43	1289.14	1327.04
FAAH	1533.61	1467.06	1471.19	1376.93	1333.07	1425.03	1359.23	1433.64	1502.18	1540.79	1522.99	1592.62
FAAHP1	0	0	0	0	0	0	1.09175	0	0	0	1.68846	0
LINC01398	0	0	0	2.12325	0	0	0	0	2.0677	0	0	0
DMBX1	9.56117	15.2819	4.41468	8.49301	10.639	17.1949	13.101	0	4.1354	1.68761	5.06539	1.69158
TMEM275	0	0	0	0	0	0	0	2.16562	0	0	0	0
MKNK1-AS1	5.7367	5.73071	11.0367	15.9244	12.7668	9.67212	13.101	5.41405	8.2708	9.28186	16.0404	3.38316
KNCN	0	0	0	0	0	0	0	2.16562	0	0	2.5327	0
MKNK1	411.13	411.656	377.455	410.849	375.557	448.142	472.727	394.143	442.488	426.966	450.82	493.941
MOB3C	501.961	479.47	507.688	513.827	535.142	482.531	526.223	500.259	481.774	411.777	375.683	444.04
LOC105378697	0	1.91024	2.20734	0	0	1.07468	0	0	0	1.68761	0	1.69158
ATPAF1	1478.16	1540.61	1335.44	1491.58	1580.96	1542.17	1601.59	1623.13	1483.57	1861.44	1825.23	1673.82
TEX38	1.91223	3.82047	4.41468	6.36975	5.3195	0	4.36699	5.41405	4.1354	5.06283	2.5327	8.4579
EFCAB14-AS1	10.5173	6.68583	8.82936	7.43138	7.4473	13.9708	15.2845	9.7453	11.3723	8.43806	9.28655	11.8411
EFCAB14	6466.22	6494.81	6573.46	6523.69	6801.51	6456.68	6183.66	6110.3	6134.86	6184.25	6488.77	6240.24
LOC105378698	12.4295	23.878	12.1404	29.7255	30.8531	38.6885	33.8442	37.8984	12.4062	21.9389	28.7039	13.5326
LOC105378699	0	0	2.20734	2.12325	0	0	0	2.16562	1.03385	0	0	0
CYP4B1	5.7367	1.91024	8.82936	8.49301	8.5112	17.1949	10.9175	50.8921	21.7108	5.06283	3.37693	15.2242
CYP4Z2P	0	0	0	0	0	0	0	0	0	0.843806	0	0
CYP4A11	0.956117	0	2.20734	5.30813	6.3834	2.14936	7.64224	2.16562	5.16925	0.843806	6.75386	2.53737
CYP4X1	616.695	760.274	675.446	806.836	845.801	866.192	743.481	861.917	891.179	735.798	873.78	805.192
CYP4A26P	0	0	0	0	0	0	0	0	0	0	0	0
LOC124904172	0	0.955119	0	4.2465	0	10.7468	0	0	0	5.90664	5.06539	1.69158
CYP4Z1	7.64893	4.77559	0	2.12325	0	2.14936	9.82573	8.66249	1.03385	3.37522	5.90962	7.61211
CYP4A22	12.4295	5.73071	13.244	7.43138	2.1278	2.14936	0	3.24843	1.03385	7.59425	0	3.38316
LOC105378701	26.7713	31.5189	22.0734	10.6163	27.6614	30.091	17.468	20.5734	22.7447	13.5009	10.975	27.9111
LINC00853	7.64893	9.55119	8.82936	12.7395	9.5751	11.8215	4.36699	11.9109	20.677	1.68761	5.06539	1.69158
PDZK1IP1	112.822	111.749	59.5982	78.5603	124.476	112.841	87.3399	148.345	125.096	106.32	95.3982	125.177
TAL1	2173.25	2287.51	2476.64	2406.71	2082.05	2210.62	1583.04	1727.08	1670.7	2172.8	2335.15	2150.84
STIL	2220.1	2134.69	2462.29	2880.19	2829.97	2617.92	2537.22	2476.39	2517.42	2429.32	2540.29	2598.27
CMPK1	10589	10629.5	9919.79	11639.7	12446.6	12328.7	11288.7	10855.2	10154.5	11173.7	12525	11849.5
LINC01389	167.32	153.774	143.477	87.0533	151.074	117.14	122.276	118.026	137.502	145.135	186.575	231.746
FOXE3	1.91223	0	4.41468	0	0	2.14936	1.09175	0	2.0677	3.37522	8.44232	1.69158
FOXD2-AS1	212.258	208.216	317.857	173.045	145.754	180.546	165.946	186.243	148.874	174.668	184.887	142.939
FOXD2	774.454	620.827	712.971	616.805	553.228	586.775	493.47	617.202	623.411	696.983	643.305	729.917
LOC124904173	6.69282	3.82047	2.20734	5.30813	10.639	3.22404	0	2.16562	3.10155	9.28186	10.975	3.38316
LINC01738	0	0	0	0	0	6.44808	2.1835	1.08281	0	0.843806	1.68846	0
LOC124904174	31.5518	23.878	11.0367	23.3558	20.2141	15.0455	24.0185	48.7265	20.677	25.3142	18.5731	15.2242
TRABD2B	38.2447	26.7433	23.1771	35.0336	28.7253	37.6138	13.101	12.9937	35.1509	37.1274	16.0404	35.5232
LINC02794	109.953	85.0056	196.453	123.149	95.751	137.559	84.0646	134.269	88.9111	79.3177	93.7098	86.2706
CYP46A4P	0	2.86536	0	4.2465	0	0	6.55049	0	0	0	0	10.9953
SKINT1L	0	0	1.10367	0	1.0639	1.07468	0	3.24843	5.16925	0	0.844232	1.69158
SLC5A9	650.159	567.34	701.934	720.844	634.085	683.497	553.516	642.107	697.849	518.94	573.234	539.614
SPATA6	38.2447	83.0953	66.2202	99.7928	82.9842	78.4517	93.8904	44.3952	55.8279	68.3483	99.6194	77.8127
PPP1R8P1	1.91223	0	0	0	0	0	0	1.08281	0	0	0	0
LOC644462	0	9.55119	8.82936	6.36975	17.0224	6.44808	4.36699	10.8281	6.2031	18.5637	6.75386	18.6074
LOC124904175	0	5.73071	0	0	0	0	0	1.08281	0	0	0	8.4579
AGBL4	0	0	0	2.12325	2.1278	0	8.73399	0	0	0	0.844232	0
BEND5	17.2101	0	6.62202	0	4.2556	3.22404	0	0	6.2031	1.68761	5.06539	2.53737
LOC105378706	0	0	0	0	0	0	0	0	0	0	0	0
LOC124904851	0	0	0	0	0	0	0	0	0	0	0	0
AGBL4-AS1	0	0	0	0	0	0	0	0	0	0	0	0
AGBL4-IT1	0	0	0	0	0	0	0	0	0	0	0	0
LOC107984954	0	0	0	0	0	0	0	0	0	0	0	0
LOC105378708	0	0	0	0	0	0	0	0	0	0	0	0
ELAVL4	0	1.91024	0	2.12325	0	0	0	0	0	0	0	0
LOC105378709	0	0	0	0	0	0	0	0	0	0	0	0
ELAVL4-AS1	0	0	0	0	0	0	0	0	0	0	0	0
LOC105378711	0	0	0	0	0	0	0	0	0	0	0	0
LOC105378710	0	0	0	0	0	0	0	0	0	0	0	0
LINC02808	0	0	0	0	0	0	0	0	1.03385	0	0	0
RPS2P11	0	0	2.20734	2.12325	2.1278	0	0	0	0	1.68761	0	0
FCF1P6	0	0	0	0	0	0	2.1835	0	0	0	0	0
DMRTA2	307.87	364.855	376.352	317.426	368.11	298.761	296.956	342.168	341.17	332.459	351.201	323.938
LOC105378714	0.956117	1.91024	2.20734	3.18488	2.1278	4.29872	6.55049	2.16562	3.10155	1.68761	0	5.07474
FAF1	2837.75	2689.61	2954.53	2806.94	3118.29	2899.49	2906.23	2831.55	2942.34	2812.4	2658.49	2754.74
FAF1-AS1	75.5332	88.826	104.849	107.224	55.3228	85.9744	92.7986	82.2936	54.794	70.8797	45.5885	62.5885
LOC124904727	0	0	2.20734	0	0	1.07468	0	0	1.03385	0	2.5327	2.53737
MRPS6P2	10.5173	1.91024	2.20734	4.2465	3.1917	1.07468	8.73399	4.33124	7.23695	1.68761	8.44232	10.9953
LOC124904176	1.91223	1.91024	2.20734	0	0	0	3.27524	4.33124	0	0	5.06539	4.22895
CDKN2C	19.1223	10.5063	9.93303	10.6163	21.278	2.14936	2.1835	12.9937	14.4739	26.158	11.8192	14.3784
MIR4421	0	0	0	0	0	0	0	0	0	0	0	0
rna-NR_039617.1	0	0	0	0	0	0	0	0	0	0	0	0
MIR6500	0	0	0	0	0	0	0	0	0	0	0	0
rna-NR_106754.1	0	0	0	0	0	0	0	0	0	0	0	0
C1orf185	0	0	0	0	0	0	0	0	0	0	0	0
CFL1P2	0	1.91024	0	0	0	0	0	0	0	0	0	0
LINC01562	2.86835	0.955119	3.31101	0	4.2556	2.14936	1.09175	0	0	0	0.844232	0
LOC107985472	0	0.955119	0	0	0	0	0	0	0	0	0	0
LOC124904818	0	0	0	0	0	0	0	0	0	0	0	0
RNF11	5009.1	4850.09	5540.43	6083.12	6153.6	5776.41	5813.56	5800.62	5303.65	4024.11	4159.53	3912.63
RPS2P8	21.9907	25.7882	27.5918	22.2941	10.639	23.643	22.9267	23.8218	15.5077	22.7828	8.44232	18.6074
TTC39A	781.147	829.998	740.563	733.583	755.369	699.617	646.315	772.044	753.677	713.016	676.23	666.483
LOC124904177	22.9468	22.9228	50.7688	25.479	8.5112	11.8215	18.5597	23.8218	16.5416	14.3447	19.4173	16.9158
TTC39A-AS1	4.78058	4.77559	3.31101	4.2465	5.3195	4.29872	0	1.08281	3.10155	3.37522	5.06539	8.4579
EPS15	4732.78	4682.95	5051.5	4903.65	4923.73	5148.79	5012.22	4637.68	4717.46	4178.53	4388.32	4143.53
LOC100422413	0.956117	13.3717	3.31101	7.43138	6.3834	3.22404	1.09175	7.57967	2.0677	3.37522	5.90962	1.69158
EPS15-AS1	1.91223	0	0	1.06163	0	0	1.09175	0	2.0677	0	1.68846	1.69158
OSBPL9	5143.91	5237.87	4792.14	5573.53	5723.78	5155.24	5681.46	5218.06	5094.81	5062.83	5495.11	5164.39
CALR4P	3.82447	0	0	0	2.1278	12.8962	12.0092	0	2.0677	1.68761	0	0
LOC105378719	0	3.82047	4.41468	0	0	0	1.09175	1.08281	0	0	0	1.69158
LOC124900447	0	3.82047	3.31101	1.06163	0	0	0	0	0	0	0	0.84579
NRDC	5015.79	4463.27	5054.81	4769.88	4995.01	4618.98	4658.49	4552.14	4858.06	5119.37	4950.58	4872.6
MIR761	0	0	1.10367	0	0	0	0	0	0	0	0	0
rna-NR_031580.1	0	0	0	0	0	0	0	0	0	0	0	0
TSEN15P2	0	0.955119	6.62202	8.49301	4.2556	7.52276	4.36699	6.49686	0	0	3.37693	5.92053
RAB3B	5111.4	4894.03	4994.11	4893.03	4490.72	4804.9	4947.8	4896.47	4882.87	3867.16	4026.14	3875.41
RPS26P14	0	4.77559	4.41468	3.18488	0	6.44808	5.45874	0	2.0677	0	0	1.69158
RN7SL290P	0	0	0	0	0	0	0	0	0	0	0	0
TXNDC12	3978.4	4271.29	3565.96	3985.34	4431.14	3931.18	3779.63	3775.76	3914.16	3922.01	4474.43	4111.39
KTI12	0	0	0	0	0	0	0	0	0	0	0	0
TXNDC12-AS1	13.3856	9.55119	13.244	6.36975	3.1917	10.7468	5.45874	11.9109	5.16925	8.43806	10.1308	8.4579
BTF3L4	4228.9	4277.98	3643.22	4541.63	4789.68	4498.61	4139.91	4152.58	4072.33	4412.26	4834.92	4641.7
LOC107984956	29.6396	14.3268	19.8661	28.6639	29.7892	21.4936	45.8534	36.8156	32.0493	16.0323	26.1712	19.4532
ZFYVE9	2333.88	2260.77	2391.65	2403.52	2371.43	2338.5	2299.22	2295.56	1970.52	2801.43	2823.11	2613.49
RN7SL788P	0.956117	4.77559	0	0	0	6.44808	5.45874	5.41405	3.10155	4.21903	0.844232	3.38316
PDCL3P6	0	1.91024	0	4.2465	0	0	0	0	0	8.43806	1.68846	0.84579
CC2D1B	2467.74	2586.46	2308.88	2320.71	2274.62	2282.62	2543.77	2633.4	2557.74	2344.09	2173.9	2380.05
PLA2G12AP1	8.60505	14.3268	2.20734	8.49301	11.7029	8.59744	17.468	8.66249	11.3723	1.68761	5.90962	2.53737
ORC1	736.21	924.555	714.075	780.295	857.504	764.098	845.013	804.528	831.215	1135.76	1215.69	1122.36
PRPF38A	1068.94	1085.01	1386.21	1108.34	1287.32	1258.45	1071.01	1257.14	1191	1235.33	1235.96	1248.39
LOC124904850	1.91223	15.2819	2.20734	5.30813	6.3834	9.67212	12.0092	0	11.3723	0.843806	11.8192	8.4579
TUT4	3095.91	3089.81	3492.01	3362.17	3750.25	3460.47	3459.75	3324.23	2655.96	3111.95	3219.06	3055.84
LOC105378723	21.9907	28.6536	30.9028	19.1093	14.8946	25.7923	21.835	20.5734	11.3723	10.9695	21.1058	14.3784
EEF1GP7	0	2.86536	4.41468	1.06163	0	0	2.1835	0	0	0	1.68846	0
GPX7	2255.48	2326.67	2103.6	2155.1	2119.29	2157.96	1819.94	2220.84	2113.19	2160.99	2331.77	2223.58
LOC124904178	8.60505	9.55119	11.0367	6.36975	8.5112	2.14936	16.3762	7.57967	7.23695	24.4704	20.2616	26.2195
SHISAL2A	107.085	141.358	130.233	109.347	118.093	106.393	100.441	94.2045	113.723	135.853	119.881	136.172
COA7	3465.92	3575.01	2637.77	3401.45	3635.35	3285.3	3640.98	3437.92	3680.51	3762.53	3883.47	3455.05
ZYG11B	3455.41	3348.65	3562.65	4122.29	4143.89	4024.68	4230.52	4219.71	3891.41	3955.76	3993.22	4110.54
RPS13P2	49.7181	78.3197	66.2202	40.3418	73.4091	52.6593	92.7986	70.3827	47.5571	77.6301	53.1866	65.9716
ZYG11A	241.898	276.029	299.095	276.023	228.739	257.923	274.029	251.212	282.241	229.515	211.058	305.33
ECHDC2	1009.66	890.171	1091.53	925.738	963.894	956.465	958.555	931.217	1036.95	872.495	805.397	944.748
LOC112268226	1.91223	0	2.20734	0	0	0	0	0	0	0	0	1.69158
SCP2	5952.78	5619.92	5629.82	6193.52	6737.68	6414.77	6274.28	5640.36	5561.08	6484.65	6620.47	6151.43
H3P2	0	0	0	2.12325	4.2556	0	1.09175	2.16562	0	0	0	0
TUBBP10	33.4641	22.9228	13.244	20.1709	35.1087	32.2404	22.9267	17.325	21.7108	32.9084	17.7289	17.7616
PODN	0	0	2.20734	0	0	2.14936	0	2.16562	0	1.68761	0	0
SLC1A7	3.82447	5.73071	4.41468	10.6163	0	0	2.1835	0	2.0677	3.37522	5.06539	3.38316
LOC105379783	0.956117	0	0	0	0	0	1.09175	3.24843	0	1.68761	0	2.53737
LOC105378724	0	0	2.20734	0	0	1.07468	0	0	0	0.843806	0	0
CPT2	804.094	1056.36	801.265	837.623	939.424	974.735	1006.59	740.643	995.597	1273.3	1332.2	1365.95
CZIB	716.131	735.441	663.306	648.653	737.283	821.056	729.288	699.496	798.132	947.594	881.378	976.888
CZIB-DT	15.2979	20.0575	28.6954	20.1709	18.0863	16.1202	16.3762	15.1593	7.23695	29.5332	4.22116	19.4532
MAGOH	1262.07	1163.33	1041.86	1074.37	1282	1058.56	1150.7	1165.1	1248.89	1182.17	1252.84	1088.53
MAGOH-DT	0	6.68583	1.10367	7.43138	2.1278	13.9708	0	0	8.2708	11.8133	5.06539	6.76632
LRP8	1112.92	1107.94	976.748	936.354	1004.32	1042.44	961.83	944.211	1118.63	1253.9	1325.44	1215.4
LOC105378728	51.6303	60.1725	89.3973	81.7452	52.1311	55.8834	61.1379	66.0515	58.9294	51.4721	45.5885	30.4484
LOC105378726	66.9282	55.3969	50.7688	56.2662	54.2589	63.4061	41.4864	69.2999	59.9633	43.8779	41.3674	30.4484
LRP8-DT	0.956117	0	2.20734	2.12325	0	0	0	0	2.0677	0.843806	3.37693	0
LOC105378731	0	3.82047	0	0	0	0	0	0	0	0.843806	0	0
LINC02812	0	0	0	0	0	0	0	0	0	0	0	0
SLC25A3P1	0	0	0	0	0	0	0	0	0	0	0	0
LOC105378733	0	0	0	0	0	0	0	0	0	0	0	0
DMRTB1	0	0	0	0	0	0	0	0	0	0	0	0
GLIS1	3.82447	0	2.20734	0	0	0	0	4.33124	0	8.43806	1.68846	1.69158
LOC124904179	0	1.91024	0	1.06163	4.2556	2.14936	4.36699	3.24843	0	0.843806	0	2.53737
NDC1	5106.62	5524.41	4522.84	5706.24	6419.57	6234.22	6031.91	5371.82	5665.5	6362.29	6769.05	6449.15
LOC124900439	0.956117	1.91024	0	0	0	0	2.1835	0	2.0677	2.53142	2.5327	1.69158
LOC124904725	0	2.86536	0	1.06163	4.2556	0	0	0	0	3.37522	3.37693	0.84579
RPL37P7	0	0	0	0	0	0	0	0	0	0	0	0
YIPF1	540.206	728.755	578.323	599.819	658.554	642.659	563.342	554.399	550.008	746.768	766.563	747.678
DIO1	1491.54	1481.39	1505.41	1524.49	1566.06	1321.86	1187.82	1378.42	1308.85	1240.39	1318.69	1378.64
LOC124904180	10.5173	1.91024	14.3477	5.30813	2.1278	6.44808	2.1835	5.41405	6.2031	5.90664	3.37693	9.30369
IFT25	364.28	396.374	375.248	341.843	428.752	387.96	411.589	495.927	484.876	466.624	477.835	429.661
LOC124904181	14.3417	13.3717	5.51835	11.6779	2.1278	6.44808	28.3855	12.9937	13.44	10.1257	23.6385	9.30369
LRRC42	2955.36	2672.42	2678.61	2819.68	2659.75	2796.32	2830.9	2611.74	2941.3	2378.69	2803.69	2474.78
LDLRAD1	1.91223	15.2819	13.244	16.986	12.7668	6.44808	10.9175	8.66249	8.2708	10.1257	10.1308	8.4579
TMEM59	5752	5981.91	5323	6245.54	6337.65	6014.99	5717.49	5572.14	5588.99	5563.21	6129.97	5624.5
TCEANC2	84.1383	120.345	83.879	52.0197	122.349	53.734	40.3947	59.5546	64.0987	125.727	117.348	137.864
MIR4781	0	0	0	0	0	0	0	0	0	0	0	0
rna-NR_039942.1	0	0	0	0	0	0	0	0	0	0	0	0
CDCP2	0	1.91024	4.41468	5.30813	5.3195	0	2.1835	2.16562	0	0	2.5327	0.84579
CYB5RL	312.65	379.182	301.302	274.961	262.783	278.342	291.497	277.2	336.001	459.874	439.845	473.642
MRPL37	1503.97	1381.1	1318.89	1219.81	1288.38	1221.91	1246.78	1306.95	1444.29	1405.78	1533.13	1305.9
SSBP3	522.04	468.008	578.323	419.342	541.525	483.606	513.122	458.029	493.146	534.129	521.735	559.067
SSBP3-AS1	17.2101	21.9677	35.3175	19.1093	46.8116	36.5391	18.5597	18.4078	23.7785	27.0018	21.95	31.2942
LOC105378735	0	0	0	0	0	0	0	0	0	0	0	0
LINC02784	0	0	0	0	0	0	0	0	0	0	0	0
TALDO1P1	1.91223	0	2.20734	0	2.1278	0	2.1835	2.16562	2.0677	1.68761	0.844232	1.69158
HNRNPA1P63	0	0	0	0	0	0	0	0	0	0	0	0
ACOT11	299.265	326.651	334.412	311.056	371.301	286.94	444.342	411.468	377.355	248.079	314.899	332.396
FAM151A	991.493	930.285	903.906	1000.05	995.811	901.657	997.858	916.058	1186.86	923.967	1086.53	981.962
MROH7-TTC4	0.956117	0	0	0	0	0	0	3.24843	0	0	1.68846	0
MROH7	0	1.91024	0	0	0	0	0	0	0	0	0	0
TTC4	11.4734	12.4165	4.41468	8.49301	2.1278	10.7468	9.82573	9.7453	7.23695	15.1885	6.75386	10.1495
PARS2	216.082	293.221	203.075	193.216	223.419	260.073	189.964	164.587	252.259	356.086	329.251	348.466
TTC22	642.51	739.262	821.131	641.222	710.685	607.194	622.297	606.374	754.71	794.865	710.843	833.949
LOC124904182	29.6396	27.6984	62.9092	32.9104	36.1726	37.6138	25.1102	36.8156	34.117	39.6589	22.7943	27.9111
CIMAP2	9.56117	2.86536	4.41468	6.36975	4.2556	2.14936	10.9175	5.41405	6.2031	14.3447	8.44232	6.76632
LOC124904183	1.91223	3.82047	0	0	0	0	2.1835	0	0	1.68761	0	5.07474
DHCR24	13646.7	14363.1	12707.7	12356.3	13738.1	12251.4	13858.7	13342.4	17657.1	19372.1	19393.7	18733.4
DHCR24-DT	26.7713	34.3843	27.5918	24.4174	23.4058	36.5391	32.7524	28.1531	35.1509	27.8456	29.5481	27.0653
LOC124904184	2.86835	1.91024	0	4.2465	0	0	0	0	2.0677	0	0.844232	4.22895
TRK-CTT7-1	0	0	0	0	0	0	0	0	0	0	0	0
LOC105378736	0	0	0	0	0	0	0	0	2.0677	0	0	0
TMEM61	7.64893	5.73071	8.82936	2.12325	6.3834	4.29872	6.55049	0	2.0677	6.75044	8.44232	5.92053
BSND	24.859	26.7433	19.8661	36.0953	19.1502	25.7923	37.1194	28.1531	33.0832	15.1885	16.8846	13.5326
PCSK9	7161.31	6867.3	7352.65	7496.14	7381.34	7203.58	7013.39	8291.08	7065.33	5750.54	5861.5	5413.06
USP24	6102.89	5697.28	6001.76	6370.82	6079.13	6059.05	6458.78	5786.54	5511.45	5977.52	5666.49	5750.53
LOC100507634	6.69282	13.3717	19.8661	6.36975	12.7668	20.4189	18.5597	6.49686	8.2708	11.8133	5.06539	8.4579
MIR4422HG	0	0	0	0	2.1278	0	0	2.16562	0	0	0	0
MIR4422	0	0	0	0	0	0	0	0	0	0	0	0
rna-NR_039618.1	0	0	0	0	0	0	0	0	0	0	0	0
LOC105378740	0	0	0	0	0	0	0	0	0	0	0	0
LINC01753	0	0	0	0	0	0	0	0	0	0	0	0
LINC01755	0	0	0	0	0	0	0	0	0	0	0	0
LOC105378737	0	0	0	0	0	0	0	0	0	1.68761	0	0
LOC105378741	0	0.955119	4.41468	0	0	0	0	0	1.03385	0	0	0
LOC124904591	0	0	0	0	0	0	0	0	0	0	0	0
LOC124904188	0	0	8.82936	0	4.2556	0	0	0	0	0	0	0
LOC124904187	0	0	11.0367	0	0	0	0	0	8.2708	0	0.844232	0
LOC124904190	0	0	0	0	0	0	0	0	0	0	0	0
RPSAP20	0	0	0	0	0	0	0	0	0	0	0	0
LOC124904186	0	0	6.62202	8.49301	0	6.44808	2.1835	0	8.2708	1.68761	5.06539	5.07474
LOC124904185	23.9029	17.1921	20.9697	8.49301	13.8307	34.3898	24.0185	51.9749	18.6093	27.8456	17.7289	38.9063
LINC01767	19.1223	8.59607	16.5551	6.36975	8.5112	10.7468	20.7432	21.6562	14.4739	10.1257	8.44232	12.6869
LOC124904189	0	0.955119	0	0	0	0	0	0	0	0	0	0
PLPP3	2011.67	1795.62	2056.14	2193.32	2299.09	1941.95	2108.17	2166.7	2093.55	1761.02	1800.75	1855.66
LOC101929935	0	0	0	0	0	0	0	0	0	0	5.06539	0
PRKAA2	1523.09	1501.45	1611.36	1784.59	1902.25	1912.93	1961.87	1779.06	1506.32	1612.51	1761.91	1747.4
FYB2	87.0066	93.6016	125.818	138.011	159.585	111.767	131.01	100.701	74.4372	100.413	99.6194	121.794
C8A	24.859	26.7433	36.4211	46.7115	43.6199	30.091	52.4039	40.064	16.5416	18.5637	34.6135	21.1448
C8B	15.2979	15.2819	33.1101	23.3558	31.917	23.643	24.0185	34.6499	20.677	17.7199	23.6385	10.1495
LOC112267900	1.91223	3.82047	6.62202	10.6163	8.5112	4.29872	0	8.66249	2.0677	3.37522	6.75386	0.84579
DAB1	53.5425	45.8457	78.3606	36.0953	54.2589	74.1529	63.3214	53.0577	54.794	35.4398	36.302	21.9905
LOC105378748	0	0	0	2.12325	0	0	0	0	0	0	1.68846	0
LOC105378747	0	0	0	0	0	0	0	3.24843	0	0	0	0.84579
DAB1-AS1	0	0	0	0	0	0	0	0	0	0	0	0
LOC105378746	0	0	0	0	0	0	0	0	0	0	0	0
HNRNPA1P6	0	0	0	0	0	0	0	0	2.0677	0	0	0
RPS26P15	3.82447	0	0	0	0	0	0	2.16562	0	0	0	0
LOC107984960	0	0	0	0	0	0	0	0	0	0	0	0
OMA1	276.318	267.433	239.496	289.824	343.64	339.599	374.47	268.537	236.752	269.174	298.014	306.176
TACSTD2	4920.18	4564.51	4404.75	4305.95	4291.77	4198.78	4358.26	4600.86	4685.41	2815.78	3008.84	2720.91
MYSM1	2355.87	2292.28	2598.04	2491.64	2731.03	2653.39	2696.62	2463.39	2019.11	2600.61	2398.46	2566.97
LOC112268263	0	3.82047	2.20734	6.36975	2.1278	0	4.36699	2.16562	4.1354	0	5.06539	3.38316
LOC124904191	1.91223	0	0	0	0	0	0	0	0	0	0.844232	0
LOC105378751	9.56117	7.64095	4.41468	0	2.1278	6.44808	2.1835	0	6.2031	1.68761	0	0
JUN	6972.96	6450.87	9675.88	9280.73	8502.69	7923.62	9870.5	10762.1	8067.13	2215.83	2147.73	2133.08
JUN-DT	1.91223	0.955119	6.62202	6.36975	2.1278	6.44808	4.36699	5.41405	8.2708	1.68761	0	1.69158
LOC101926907	65.972	85.0056	93.812	53.0813	65.9618	73.0783	45.8534	67.1343	74.4372	55.6912	65.8501	39.7521
LOC107984961	0.956117	1.91024	2.20734	0	1.0639	0	2.1835	0	1.03385	0.843806	2.5327	0
LINC02777	22.9468	29.6087	48.5615	21.2325	12.7668	26.867	17.468	8.66249	28.9478	10.1257	26.1712	35.5232
LINC01358	0	0	2.20734	0	0	0	2.1835	0	0	0	0	0
HSD52	0	0	0	0	1.0639	0	2.1835	0	2.0677	0	0	0
FGGY-DT	1.91223	1.91024	4.41468	0	5.3195	2.14936	4.36699	2.16562	7.23695	8.43806	6.75386	9.30369
FGGY	450.331	451.771	374.144	367.322	372.365	394.408	382.112	424.462	422.845	339.21	378.216	444.04
LOC124904192	0	0	0	0	0	0	0	0	0	0.843806	0	3.38316
MIR4711	0	0	0	0	0	0	0	0	0	0	0	0
rna-NR_039861.1	0	0	0	0	0	0	0	0	0	0	0	0
LOC105378758	0	0	1.10367	0	0	0	1.09175	0	1.03385	0	0	0
LOC101926944	1.91223	0	0	0	0	0	0	0	0	0	0	0
HOOK1	6376.34	6299.01	6444.33	6717.97	6811.09	7231.52	6874.74	6333.36	5543.5	5908.33	6467.66	6133.67
CYP2J2	36.3324	45.8457	35.3175	21.2325	23.4058	36.5391	52.4039	36.8156	37.2186	38.8151	34.6135	38.9063
C1orf87	0	0	0	0	0	0	0	0	0	0	0	0
PGBD4P8	0	0	0	0	0	0	0	0	0	0	0	0
LINC02778	0	0	0	0	0	0	0	0	0	0	0	0
LOC107984963	0	0	0	0	0	0	0	0	0	0	0	0
LOC105378761	0	0	0	0	0	0	0	0	0	0	0	0
LOC107984962	0	0	0	0	0	2.14936	0	0	0	0	0	0
LOC107985379	0	0	0	0	0	0	0	0	0	0	0	0
LINC01748	17.2101	23.878	33.1101	14.8628	35.1087	23.643	12.0092	36.8156	19.6431	32.9084	48.1212	17.7616
LOC124904193	17.2101	29.6087	19.8661	50.958	35.1087	34.3898	54.5874	22.739	31.0155	44.7217	42.2116	48.21
LOC101926964	0	0	0	0	0	0	0	0	0	0	0	0
LOC105378764	1.91223	0	0	0	0	0	0	0	0	0	0	0
NFIA-AS2	0	0	0	0	0	0	0	0	0	0	0	0
NFIA	61.1915	55.3969	80.5679	78.5603	59.5784	85.9744	25.1102	40.064	46.5232	72.5673	96.2425	78.6585
NFIA-AS1	0	0	0	0	0	0	0	0	0	0	0	3.38316
LOC105378766	0	0	0	0	0	0	1.09175	0	0	0	0	0
LOC107984964	0	0	0	0	0	0	0	0	0	0	0	0
MGC34796	0	0	0	2.12325	0	0	0	0	0	0	0	0
TM2D1	477.102	426.938	390.699	535.059	576.634	626.539	589.544	550.068	520.026	375.493	527.645	423.741
PATJ-DT	9.56117	9.55119	18.7624	11.6779	13.8307	11.8215	16.3762	14.0765	13.44	4.21903	9.28655	13.5326
PATJ	3869.4	3731.65	3937.9	4050.1	4055.59	3778.58	4005.62	3834.23	3571.95	3430.07	3544.93	3386.54
MIR12132	0	1.91024	0	2.12325	2.1278	0	0	0	0	0	0.844232	0.84579
rna-NR_162146.1	0	0	0	0	0	0	0	0	0	0	0	0
LOC107984965	2.86835	3.82047	0	1.06163	0	1.07468	5.45874	9.7453	8.2708	6.75044	5.90962	6.76632
MIR3116-1	0	0	0	0	0	0	0	0	0	0	0	0
MIR3116-2	0	0	0	0	0	0	0	0	0	0	0	0
rna-NR_036059.1	0	0	0	0	0	0	0	0	0	0	0	0
rna-NR_036058.1	0	0	0	0	0	0	0	0	0	0	0	0
RPS15AP7	0	0	0	0	0	0	0	0	0	0	0	0
L1TD1	1.91223	10.5063	2.20734	0	2.1278	5.3734	6.55049	0	0	0	0	3.38316
KANK4	4277.67	4912.17	3764.62	3934.38	3846	3742.04	3215.2	3354.55	3522.33	4292.44	4302.21	4223.03
LOC105378768	0	0	0	0	0	0	0	1.08281	0	0	0	0
USP1	3938.24	4218.76	3867.26	4353.73	5134.38	5008.01	5047.15	4402.71	4466.23	4848.51	5109.29	4511.44
DOCK7	3256.53	3389.72	3710.54	3577.68	3745.99	3645.32	3725.05	3418.43	3187.36	3364.25	3602.34	3673.27
ANGPTL3	230.424	182.428	168.862	187.908	168.096	126.812	188.872	120.192	135.434	160.323	161.248	182.691
DOCK7-DT	59.2792	76.4095	71.7386	44.5883	67.0257	69.8542	64.4131	60.6374	46.5232	108.007	89.4886	94.7285
LOC124904194	17.2101	20.0575	37.5248	8.49301	36.1726	15.0455	24.0185	34.6499	12.4062	27.0018	18.5731	37.2148
ATG4C	263.888	199.62	224.045	318.488	303.212	275.118	219.441	159.173	198.499	283.519	330.095	372.993
LINC01739	0	0	0	0	0	0	0	0	0	0	0	0
LINC00466	0	0	0	0	0	0	0	0	0	0	0	0
LOC105378770	0	0	0	0	0	0	0	0	0	0	0	0
RPSAP65	0	0	0	0	0	0	0	0	0	0	0	0
FOXD3-AS1	0	0	0	2.12325	2.1278	0	2.1835	0	4.1354	0	0	0
FOXD3	0	0	0	2.12325	2.1278	0	0	0	2.0677	0	1.68846	0
MIR6068	0	0	0	0	0	0	0	0	0	0	0	0
rna-NR_106716.1	0	0	0	0	0	0	0	0	0	0	0	0
LOC124904741	0	0	0	0	0	0	0	0	0	0	0	0
ALG6	653.984	617.962	662.202	629.544	714.941	632.987	677.976	734.146	626.513	817.648	783.447	862.706
ITGB3BP	410.174	469.918	337.723	454.376	659.618	582.477	556.792	426.627	489.011	502.064	533.555	493.096
LOC102724319	0	1.91024	6.62202	0	1.0639	1.07468	1.09175	1.08281	1.03385	1.68761	1.68846	0
EFCAB7	69.7965	100.287	69.5312	62.6359	72.3452	70.9289	93.8904	45.478	95.1142	91.131	119.881	126.869
DLEU2L	4.78058	0	2.20734	0	0	4.29872	4.36699	2.16562	4.1354	1.68761	3.37693	6.76632
PGM1	1886.42	1951.31	1985.5	2733.69	2540.59	2571.71	2287.21	2604.16	2316.86	2026.82	2256.63	1924.17
LOC105378771	25.8151	21.0126	23.1771	21.2325	13.8307	20.4189	31.6607	32.4843	21.7108	36.2836	41.3674	62.5885
ROR1	2951.53	3247.4	2636.67	2608.41	2854.44	2642.64	2773.04	2389.76	2761.41	3951.54	3475.7	3883.02
RPL19P3	11.4734	5.73071	14.3477	0	5.3195	6.44808	8.73399	19.4906	6.2031	15.1885	8.44232	19.4532
CFL1P3	13.3856	12.4165	13.244	0	0	6.44808	3.27524	0	8.2708	9.28186	4.22116	8.4579
LOC105378772	1.91223	0	2.20734	0	1.0639	4.29872	2.1835	0	6.2031	3.37522	0.844232	5.92053
ROR1-AS1	3.82447	3.82047	9.93303	13.8011	13.8307	8.59744	6.55049	9.7453	7.23695	14.3447	14.3519	2.53737
LOC105378773	0	0	0	0	1.0639	2.14936	0	0	0	0	0	2.53737
UBE2U	0	0	0	0	0	0	0	0	0	0	3.37693	0
LOC105378774	0	0	0	0	0	0	0	0	0	0	0	0
LOC124904732	0	0	0	0	0	0	0	0	0	0	0	0
LOC107984966	5.7367	0	2.20734	2.12325	0	0	0	0	2.0677	0	0	0
CACHD1	1639.74	1487.12	1651.09	1649.77	1537.34	1349.8	1412.72	1254.98	1246.82	2203.18	2022.78	2222.74
LOC124904195	46.8497	45.8457	57.3909	44.5883	48.9394	25.7923	50.2204	42.2296	12.4062	46.4093	54.0309	78.6585
MIR4794	0	0	0	0	0	0	0	0	0	0	0	0
rna-NR_039957.1	0	0	0	0	0	0	0	0	0	0	0	0
RAVER2	2024.1	2031.54	1967.84	2251.71	2069.29	2035.44	1926.94	1893.84	1844.39	2194.74	2090.32	2153.38
JAK1	3848.37	3805.19	3947.83	3839.9	4043.89	3882.82	4346.25	3985.83	3913.12	3965.89	3776.25	3760.38
LOC100130270	0.956117	0.955119	1.10367	0	0	0	1.09175	1.08281	2.0677	0	0	1.69158
LINC01359	7.64893	9.55119	2.20734	4.2465	0	4.29872	7.64224	2.16562	4.1354	1.68761	7.59809	1.69158
SLC2A3P2	18.1662	3.82047	13.244	8.49301	3.1917	2.14936	1.09175	2.16562	0	8.43806	8.44232	5.07474
MIR3671	1.91223	1.91024	4.41468	4.2465	3.1917	2.14936	0	2.16562	0	0	2.5327	4.22895
rna-NR_037443.1	0	0	0	0	0	0	0	0	0	0	0	0
MIR101-1	0	0	2.20734	2.12325	0	0	0	0	2.0677	0.843806	0	1.69158
rna-NR_029516.1	0	0	0	0	0	0	0	0	0	0	0	0
AK4	12022.2	11888.4	11676.8	13227.9	14305.2	13794.6	13055.1	12767.4	11840.7	13911	15118.5	13862.5
DNAJC6	498.137	475.649	338.827	433.143	533.014	427.723	383.204	411.468	394.931	418.528	449.131	385.68
LOC102724416	3.82447	10.5063	0	4.2465	4.2556	4.29872	9.82573	1.08281	14.4739	14.3447	6.75386	11.8411
LOC112268227	11.4734	3.82047	8.82936	15.9244	14.8946	8.59744	4.36699	4.33124	12.4062	6.75044	6.75386	4.22895
LEPR	299.265	295.132	348.76	467.115	496.841	458.888	395.213	465.609	256.395	318.959	397.633	367.073
LEPROT	2542.31	2492.86	2458.98	2631.77	2824.66	2544.84	2700.99	2545.69	2552.58	2568.54	2858.57	2396.97
LOC124904827	0	0	0	0	0	0	0	0	2.0677	0	0	0
LOC100422694	1.91223	3.82047	0	0	0	0	6.55049	0	0	0	3.37693	1.69158
PDE4B	0	3.82047	0	2.12325	0	0	8.73399	2.16562	0	1.68761	0	0
PDE4B-AS1	0	0	0	0	0	0	0	0	0	0	0	0
LOC105378776	0	0	0	0	0	0	0	0	0	0	0	0
SGIP1	0	0	0	0	0	0	0	0	0	0	0	0
LOC124904196	1.91223	0	0	0	0	0	0	6.49686	0	0	0	0
MIR3117	0	0	0	0	0	0	0	0	0	0	0	0
rna-NR_036060.1	0	0	0	0	0	0	0	0	0	0	0	0
DYNLT5	0	0	0	0	0	0	0	0	0	0	0	0
INSL5	0	0	0	0	0	0	0	0	0	0	0	0
DNAI4	26.7713	8.59607	18.7624	33.972	21.278	0	14.1927	14.0765	23.7785	14.3447	8.44232	35.5232
MIER1	1646.43	1619.88	1686.41	1785.65	2065.03	2137.54	1936.76	1809.38	1645.89	1521.38	1702.82	1731.33
SLC35D1	3584.48	3354.38	3563.75	4149.89	4531.15	4396.52	4083.14	4232.71	3519.22	3347.38	3590.52	3459.28
C1orf141	0	0	0	0	0	0	0	0	0	0	0	0.84579
LOC124900434	0	0	0	0	0	0	0	0	0	0	0	0
IL23R	0	5.73071	0	0	0	0	0	0	0	0	1.68846	1.69158
DNAJB6P4	0	0	0	0	0	0	0	0	0	1.68761	0	0
IL12RB2	100.392	82.1402	60.7019	97.6696	120.221	94.5719	133.193	105.033	147.841	169.605	151.118	163.237
SERBP1	12534.7	11480.5	12515.6	12291.5	13699.8	13120.8	12879.4	12533.5	11685.6	13025.8	13799	12493.2
LINC01702	0	0	0	0	0	0	0	0	0	0	0	0
LOC105378780	0	1.91024	0	0	0	0	0	0	0	0	0	0.84579
LOC124904197	0	0	0	0	1.0639	0	0	0	0	0	0	0
HNRNPCP9	0	0.955119	0	0	0	0	0	0	0	0	0.844232	0
GADD45A	5469.94	5086.01	7273.19	6693.55	6091.89	5364.8	5511.15	6652.79	5240.58	1955.94	1792.3	1796.46
GNG12	3295.73	3117.51	3313.22	3364.29	3664.07	3709.8	3299.26	3116.33	3221.48	2982.01	3396.35	3263.9
LOC105378781	6.69282	10.5063	30.9028	9.55463	8.5112	3.22404	6.55049	9.7453	8.2708	3.37522	2.5327	11.8411
RNU7-80P	0.956117	0.955119	1.10367	5.30813	0	1.07468	1.09175	1.08281	0	0	0	0
GNG12-AS1	27.7274	41.0701	28.6954	42.465	47.8755	33.3151	39.3029	19.4906	36.1847	16.0323	27.8597	16.07
LOC124900403	0	0	0	0	0	0	0	0	0	0	0	1.69158
LOC100133029	0	0	0	0	0	0	0	0	0	1.68761	0	0
DIRAS3	0	0	4.41468	0	0	2.14936	0	0	0	1.68761	0	0
WLS	3861.76	3750.75	3933.48	3692.33	3758.76	3398.14	3308	3711.88	3449.96	3186.21	3515.38	2889.22
CTBP2P8	29.6396	13.3717	17.6587	11.6779	13.8307	5.3734	15.2845	24.9046	23.7785	6.75044	5.06539	16.07
MIR1262	1.91223	1.91024	1.10367	2.12325	0	0	0	4.33124	0	0	0	0.84579
rna-NR_031664.1	0	0	0	0	0	0	0	0	0	0	0	0
RPS7P4	11.4734	7.64095	8.82936	14.8628	4.2556	8.59744	4.36699	6.49686	4.1354	10.1257	10.1308	5.07474
LOC105378782	0	0	0	0	0	0	0	0	0	0	0	0
LOC124904198	0.956117	1.91024	0	0	0	0	0	0	0	0	0	0
RPE65	3.82447	0	0	4.2465	2.1278	4.29872	2.1835	6.49686	0	0	6.75386	0
DEPDC1	1182.72	1149.96	1054.01	1363.13	1809.69	1581.93	1530.63	1394.66	1292.31	1492.69	1561.83	1528.34
DEPDC1-AS1	2.86835	4.77559	2.20734	8.49301	4.2556	2.14936	2.1835	2.16562	2.0677	5.90664	7.59809	5.07474
LOC107984967	0	0	0	0	0	0	0	0	0	0	0	0
LOC105378783	0	1.91024	0	0	0	0	0	0	0	1.68761	0	0
LINC01707	0	0	0	0	0	0	0	2.16562	0	0	0	0
LOC105378787	0	0	0	0	0	0	0	0	0	0	0	0
LINC02791	0	0	0	0	0	0	0	0	0	0	0	0
LINC01758	0	0	0	2.12325	0	2.14936	0	6.49686	4.1354	5.06283	1.68846	3.38316
LOC105378789	19.1223	5.73071	13.244	19.1093	27.6614	19.3442	19.6515	30.3187	14.4739	28.6894	18.5731	25.3737
LRRC7	389.139	474.694	519.829	494.718	477.691	430.947	349.359	435.29	370.118	427.809	403.543	461.801
LOC124904199	0.956117	1.91024	2.20734	0	1.0639	2.14936	0	3.24843	1.03385	1.68761	0	0
PIN1P1	0	0	0	4.2465	0	0	0	0	0	3.37522	0	0
LRRC7-AS1	9.56117	5.73071	0	10.6163	5.3195	8.59744	2.1835	4.33124	4.1354	5.06283	3.37693	5.92053
LRRC40	1802.28	1662.86	1654.4	1947.02	2287.39	2221.36	2011	1780.14	1690.34	1703.64	1984.79	1892.88
RN7SL242P	9.56117	2.86536	4.41468	2.12325	6.3834	2.14936	2.1835	3.24843	3.10155	5.06283	13.5077	4.22895
SRSF11	4932.61	4835.77	5125.45	5257.17	5242.9	5456.15	5138.86	5023.16	4380.42	4305.1	4460.92	4645.08
ANKRD13C	1576.64	1688.65	1339.86	1720.9	1626.7	1836.63	1805.75	1667.53	1516.66	1577.07	1608.26	1645.06
ANKRD13C-DT	9.56117	0	6.62202	1.06163	8.5112	1.07468	8.73399	10.8281	14.4739	15.1885	2.5327	9.30369
LINC03102	15.2979	5.73071	6.62202	11.6779	10.639	17.1949	8.73399	11.9109	12.4062	16.0323	9.28655	10.9953
CTH	345.158	228.273	305.717	316.364	292.573	308.433	244.552	318.346	262.598	253.142	229.631	294.335
LOC105378793	0	0	0	0	0	0	0	0	0	0	0	0
LOC105378794	0	0	0	0	0	0	0	0	0	0	0.844232	0
LINC01788	0	0	0	0	0	0	0	0	0	0	0	0
LOC102724572	0	0	0	0	0	0	0	0	0	0	0	0
PTGER3	0	1.91024	0	0	8.5112	4.29872	0	0	4.1354	0	0	1.69158
ZRANB2-AS1	43.0252	22.9228	38.6285	41.4034	38.3004	47.2859	43.6699	35.7328	27.9139	31.2208	49.8097	47.3642
ZRANB2	1862.52	1673.37	1598.11	1629.6	1678.83	1806.54	1867.98	1600.39	1554.91	2100.23	2134.22	2281.94
MIR186	0	3.82047	0	5.30813	0	3.22404	4.36699	2.16562	0	4.21903	0.844232	3.38316
rna-NR_029707.1	0	0	0	0	0	0	0	0	0	0	0	0
ZRANB2-DT	13.3856	3.82047	15.4514	11.6779	3.1917	13.9708	7.64224	4.33124	6.2031	10.1257	4.22116	5.07474
LOC105378795	0	0	0	1.06163	0	0	1.09175	2.16562	0	5.06283	0	0.84579
NEGR1	5.7367	9.55119	1.10367	2.12325	0	8.59744	1.09175	5.41405	0	0	6.75386	1.69158
NEGR1-IT1	0	0	0	0	0	0	0	0	0	0	0	0
LOC105378797	0	0	0	0	0	0	0	0	0	0	0	0
LOC105378796	0	0	0	0	0	0	0	0	0	0	0	0
LOC105378798	0	0	0	0	0	0	0	0	0	0	0	0
LINC02796	0	0	0	0	0	0	0	0	0	0	0	0
LINC02797	0	0	0	0	0	0	0	0	0	0	0	0
KRT8P21	0	0	0	0	0	0	0	0	0	0	0	0
LOC105378800	0	0	0	0	0	0	0	0	0	0	0	0
LINC01360	0	0	0	0	0	0	0	0	0	0	0	1.69158
LOC105378801	0	0	0	0	0	0	0	0	0	0	0	0
LOC107985391	0	0	0	0	0	0	0	0	0	0	0	0
LOC105378802	0	0	0	0	0	0	0	0	0	0	0	0
LINC02238	0	0	0	0	0	0	0	0	0	0	0	0
RNA5SP50	0	0	0	0	0	0	0	0	0	0	0	0
LRRIQ3	7.64893	11.4614	4.41468	11.6779	3.1917	10.7468	22.9267	4.33124	2.0677	19.4075	3.37693	6.76632
FPGT	367.149	369.631	313.442	510.642	424.496	441.694	388.662	280.448	294.647	567.037	603.626	708.772
FPGT-TNNI3K	0	0	0	0	0	0	0	0	0	0	0	0
TNNI3K	0	0	0	0	0	0	0	0	0	0	0	0
LRRC53	0	0	0	6.36975	0	0	0	0	2.0677	0	0	0
ERICH3	1.91223	0	0	10.6163	0	0	0	0	0	0	0	1.69158
ERICH3-AS1	0	0	0	0	0	0	0	0	0	0	0	0
CRYZ	4117.99	3971.38	4025.09	4535.26	4630.09	4639.39	3965.23	3829.9	3599.87	3797.97	4329.22	4104.62
TYW3	1276.42	1085.01	1005.44	1209.19	1313.92	1265.97	1343.94	1168.35	1196.16	1330.68	1270.57	1315.2
LHX8-AS1	1.91223	0	2.20734	0	0	0	2.1835	2.16562	0	0	0	0
LHX8	1.91223	0	1.10367	0	0	0	8.73399	0	4.1354	1.68761	0	0
SLC44A5	1339.52	1252.16	1432.56	1623.23	1490.52	1762.48	1583.04	1731.41	1183.76	1140.83	1207.25	1272.07
RPL29P5	0	0	0	0	0	0	0	0	0	0	0	0
LOC100421536	1.91223	0	0	4.2465	0	3.22404	0	0	0	1.68761	0	1.69158
ACADM	2985	2747.88	2444.63	2782.52	3563	3149.89	2995.76	2943.08	2684.91	2871.47	3276.46	2777.57
DLSTP1	36.3324	47.7559	41.9395	18.0476	21.278	35.4644	34.9359	34.6499	22.7447	60.754	57.4078	79.5043
RABGGTB	4945.04	4693.45	4880.43	5583.09	5468.45	5801.12	5284.06	5497.43	4526.19	3379.44	3728.13	3699.49
SNORD45C	109.953	97.4221	119.196	149.689	123.412	127.887	164.854	153.759	86.8434	102.1	92.8655	90.4995
SNORD45A	93.6994	86.9158	76.1533	105.101	74.473	121.439	129.918	79.0452	85.8095	119.82	71.7597	106.57
SNORD45B	65.972	80.23	60.7019	90.2382	86.1759	109.617	102.624	49.8093	54.794	81.8491	56.5635	81.1959
MSH4	12.4295	9.55119	11.0367	8.49301	8.5112	26.867	6.55049	18.4078	14.4739	4.21903	0	5.07474
ASB17	0	1.91024	0	0	0	0	0	0	0	0	0	3.38316
LOC105378806	0	0	0	0	0	0	0	0	0	0	0	0
LOC101927342	0	0	0	0	0	0	0	0	0	0	0	0
LOC124904200	0	0	6.62202	0	0	0	0	8.66249	0	0	0	1.69158
ST6GALNAC3	1088.06	1129.91	1131.26	1181.59	1269.23	1260.6	1209.66	1016.76	1123.79	1316.34	1463.9	1327.04
LOC105378807	0	0	0	0	0	0	0	0	0	0	0.844232	1.69158
LOC124904201	0	0	0	0	0	2.14936	0	1.08281	0	4.21903	0	0
LINC02567	0	0	0	0	0	0	0	0	0	0	0	0
ST6GALNAC5	11.4734	11.4614	14.3477	0	10.639	2.14936	15.2845	18.4078	6.2031	16.0323	18.5731	15.2242
MIR7156	0	0	0	0	0	0	0	0	0	0	0	0
rna-NR_106978.1	0	0	0	0	0	0	0	0	0	0	0	0
PIGK	2058.52	1836.69	1758.15	1905.62	2198.02	2080.58	1936.76	1709.76	1558.01	1927.25	2396.77	2221.89
LOC100421400	1.91223	5.73071	0	1.06163	2.1278	1.07468	0	0	0	0	2.5327	0
LOC105378808	13.3856	32.474	0	16.986	7.4473	23.643	16.3762	6.49686	6.2031	28.6894	29.5481	33.8316
AK5	28.6835	56.352	33.1101	45.6499	22.3419	26.867	44.7617	40.064	40.3201	36.2836	23.6385	21.9905
RNU7-8P	0	0	0	0	0	0	0	0	0	0	0	0
LOC124904202	0	0	0	0	0	0	0	0	0	0	0	0
ZZZ3	2635.06	2856.76	2447.94	2939.64	3117.23	2867.25	3121.31	2853.21	2730.4	3090.86	3298.41	3222.46
USP33	2387.42	2385.89	2095.87	2462.97	2631.03	2581.38	2687.88	2362.69	2518.46	2498.51	2680.44	2695.53
MIGA1	1972.47	2003.84	1818.85	2219.86	2424.63	2250.38	1910.56	1740.08	1720.33	2087.57	2314.88	2306.47
LOC653631	9.56117	11.4614	26.4881	8.49301	19.1502	15.0455	4.36699	4.33124	4.1354	13.5009	10.1308	10.1495
HSPE1P25	0	0	1.10367	0	0	0	0	3.24843	0	0	0	2.53737
NEXN-AS1	3.82447	7.64095	5.51835	2.12325	17.0224	0	12.0092	5.41405	5.16925	6.75044	7.59809	6.76632
NEXN	43.0252	77.3646	38.6285	49.8964	38.3004	44.0619	60.0462	40.064	39.2863	75.0987	57.4078	100.649
FUBP1	5688.89	5490.98	5725.84	6414.34	7073.87	6732.87	7070.16	7399.93	5989.09	5283.07	5870.79	5894.31
DNAJB4	369.061	322.83	251.637	391.74	431.944	442.768	347.176	343.251	314.29	272.549	445.755	396.676
LOC100131495	7.64893	9.55119	4.41468	1.06163	6.3834	0	7.64224	2.16562	0	5.06283	3.37693	3.38316
GIPC2	1398.8	1340.99	1448.02	1571.21	1719.26	1719.49	1381.06	1488.86	1285.08	1370.34	1453.77	1404.86
LOC107984997	34.4202	28.6536	55.1835	33.972	25.5336	39.7632	39.3029	38.9812	45.4894	36.2836	62.4732	47.3642
MGC27382	2.86835	0	2.20734	4.2465	2.1278	13.9708	6.55049	0	0	4.21903	4.22116	2.53737
PTGFR	0	0	0	0	0	0	8.73399	0	2.0677	0	0	0
IFI44L	0	0	0	0	0	0	0	0	0	0	1.68846	0
IFI44	0	0	0	0	0	3.22404	0	0	0	0	0	0
LOC652549	0	0	0	8.49301	0	0	0	2.16562	0	0	0	0
LOC124904203	0	0	0	0	0	0	0	0	0	0	0	0
ADGRL4	0	0	0	0	0	0	0	0	0	0	0	0
PSAT1P3	0	0	0	0	0	0	2.1835	0	0	0	0	0
LOC107984998	0	0	0	0	0	0	0	0	0	0	0	0
LOC105378810	0	0	0	0	0	0	0	0	0	0	0	0
LOC105378812	0	0	0	0	0	0	0	0	0	0	0	0
LOC105378811	0	0	0	0	0	0	0	0	0	0	0	0
LINC02792	0	0	0	0	0	0	0	0	0	0	0	0
ADH5P2	0	1.91024	0	0	0	2.14936	0	0	0	1.68761	1.68846	3.38316
LOC553139	0	0	0	0	0	0	0	0	0	0	0	0
HNRNPA1P64	3.82447	0	0	0	0	0	0	0	0	0	0	0
LINC01781	0	0	0	0	0	0	0	0	0	0	0	0
LOC105378813	0	0	0	0	0	0	0	0	0	0	0	0
RPL10AP4	0	0	0	0	0	0	0	0	0	0	0	0
LOC107985018	0	0	0	0	0	0	0	0	0	0	0	0
ADGRL2	523.952	484.245	498.859	453.314	456.413	574.954	469.452	403.888	443.522	594.039	611.224	489.712
LOC101927434	0	0	0	0	0	4.29872	0	0	0	0	0	0
LOC124904204	0	0	0	0	0	0	0	0	0	0	0	0
LOC105378814	0	0	0	0	0	0	0	0	0	0	0	0
LOC107985396	0	0	0	0	0	0	0	0	0	0	0	0
LINC01362	1.91223	0	1.10367	3.18488	0	1.07468	1.09175	0	0	0	0	0
LINC01361	0	0	2.20734	0	0	0	0	0	0	0	0	0
LOC105378816	0	1.91024	6.62202	4.2465	0	4.29872	2.1835	0	0	0	0	0
LINC01712	0	0	0	0	0	0	0	0	0	0	0	0
LOC107985043	0	0	0	0	0	0	0	0	0	0	0	0
ARF4P5	0	0	0	0	0	0	0	0	0	0	0	0
LINC01725	0	0	0	0	0	0	0	0	0	1.68761	0	0
LOC101927560	0	0	0	0	0	0	0	0	0	1.68761	0	0
TTLL7	17.2101	5.73071	7.72569	9.55463	8.5112	2.14936	4.36699	10.8281	4.1354	3.37522	13.5077	23.6821
TTLL7-IT1	0	0	0	0	0	0	0	0	0	0	0	1.69158
LOC124904205	0	0	0	0	0	0	0	0	0	0	0	0
PRKACB	81.2699	113.659	104.849	88.1149	119.157	110.692	119.001	62.803	93.0465	119.82	139.298	125.177
TXN2P1	1.91223	0	2.20734	0	0	4.29872	0	0	0	3.37522	1.68846	5.07474
NEDD8P1	1.91223	0	0	0	0	0	0	6.49686	0	1.68761	3.37693	0
LOC124904808	0	0	0	0	0	0	0	0	0	0	0	0
SAMD13	7.64893	22.9228	2.20734	6.36975	15.9585	19.3442	0	8.66249	12.4062	16.8761	20.2616	19.4532
UOX	0	0	0	0	0	0	0	0	0	0	0	0
DNASE2B	0	0	0	0	0	0	0	0	0	0	0	0
RPF1	969.502	967.535	889.558	889.642	1004.32	856.52	804.618	989.689	912.889	861.525	1043.47	915.145
GNG5	1043.12	1024.84	1103.67	905.567	959.638	973.66	912.702	1234.4	1124.83	801.615	905.017	797.58
SPATA1	18.1662	17.1921	18.7624	12.7395	12.7668	6.44808	4.36699	6.49686	16.5416	19.4075	25.327	35.5232
CTBS	720.912	638.019	664.41	782.418	1007.51	853.296	668.15	759.05	529.331	761.956	777.538	717.23
LOC105378819	0	0	0	1.06163	0	2.14936	0	2.16562	0	0	0	3.38316
LINC01461	0	1.91024	0	0	0	0	0	0	0	1.68761	0	0
LINC01555	0	0	2.20734	0	8.5112	4.29872	0	0	0	1.68761	0	3.38316
LOC124904206	0	1.91024	0	0	1.0639	0	0	0	0	0	0	0
SSX2IP	972.371	901.632	942.535	962.895	1221.36	1129.49	1131.05	1067.65	1049.36	988.096	1063.73	1009.87
LOC102724892	0	0	0	2.12325	0	0	0	0	0	0	0	0
LPAR3	0	0	0	0	0	0	0	0	0	0	0	0
MCOLN2	0	0	0	0	0	0	2.1835	0	0	1.68761	0	16.9158
MCOLN3	131.944	126.076	141.27	101.916	117.029	101.02	103.716	90.9561	88.9111	98.7253	179.821	107.415
DNAI3	0	1.91024	2.20734	0	0	0	4.36699	0	4.1354	5.90664	3.37693	0
MIR4423	0	0	0	0	0	0	0	0	0	0	0	0
rna-NR_039619.1	0	0	0	0	0	0	0	0	0	0	0	0
SYDE2	1485.81	1360.09	1526.38	1612.61	1533.08	1620.62	1734.79	1355.68	1405	1550.91	1724.77	1853.97
LOC124904207	25.8151	32.474	56.2872	38.2185	48.9394	63.4061	63.3214	51.9749	31.0155	73.4111	43.0558	79.5043
LOC105378821	0	1.91024	0	0	0	2.14936	0	2.16562	0	0	1.68846	0
C1orf52	1169.33	1067.82	1076.08	1086.04	1145.82	1173.55	1066.64	1146.7	988.36	882.621	997.882	1088.53
BCL10	2144.57	2152.84	2937.97	2453.42	2600.17	2637.27	2610.37	2544.61	2377.85	1358.53	1389.61	1275.45
BCL10-AS1	14.3417	9.55119	11.0367	10.6163	5.3195	17.1949	27.2937	24.9046	19.6431	7.59425	5.06539	14.3784
DDAH1	9602.28	9136.66	9145.01	9575.86	10093.2	9818.28	8989.46	8772.93	9173.35	10852.2	11029	10528.4
LOC124904208	54.4986	43.9355	37.5248	40.3418	31.917	50.51	55.6792	50.8921	48.5909	53.1598	52.3424	55.8221
CCN1	1454.25	1448.91	1929.22	1645.52	1471.37	1616.32	2420.41	2530.53	2976.45	1118.04	1037.56	964.201
LOC124900422	0	0	0	0	0	0	0	0	0	0	0	0
LOC112268231	0	1.91024	0	2.12325	1.0639	0	0	2.16562	2.0677	5.06283	3.37693	8.4579
LOC107985057	0	0.955119	2.20734	2.12325	0	3.22404	0	0	2.0677	5.90664	3.37693	8.4579
ZNHIT6	946.555	916.914	785.813	764.371	914.954	828.578	901.784	807.777	841.554	1172.89	1162.51	988.729
LOC105378823	0	0	0	0	0	0	0	0	0	0	0	0
COL24A1	9.56117	5.73071	4.41468	12.7395	10.639	0	5.45874	4.33124	12.4062	8.43806	6.75386	5.07474
LINC02795	0	0	0	2.12325	0	0	0	0	0	0	0	0
LOC105378825	0	3.82047	0	0	0	0	0	0	0	0	1.68846	0
ODF2L	250.503	200.575	165.551	201.709	193.63	260.073	234.726	228.473	227.447	268.33	227.943	296.872
MIR7856	0	0	0	0	0	0	0	0	0	0	0.844232	0
rna-NR_107010.1	0	0	0	0	0	0	0	0	0	0	0	0
CLCA2	0	1.91024	0	0	0	2.14936	0	0	0	0	1.68846	0
CLCA1	0	1.91024	2.20734	0	0	0	0	0	2.0677	0	0	3.38316
LOC124904210	0	0	2.20734	0	0	0	0	0	0	0	0	0
LOC105378827	1.91223	0	0	2.12325	2.1278	0	0	0	4.1354	0	0.844232	0
LOC105378826	0	0	0	0	0	0	0	1.08281	0	0	0	0
CLCA4	0.956117	0	2.20734	4.2465	0	2.14936	6.55049	0	0	3.37522	3.37693	5.07474
CLCA4-AS1	1.91223	7.64095	4.41468	2.12325	10.639	5.3734	8.73399	4.33124	2.0677	4.21903	5.06539	11.8411
CLCA3P	0	0	0	2.12325	2.1278	0	0	0	0	5.90664	0	0
SH3GLB1	2843.49	2704.9	2681.92	2811.18	3186.38	2706.04	3150.79	2696.2	2723.16	2494.29	2704.08	2693.84
LOC105378831	0	0	0	0	0	0	0	0	0	0	0	0
SELENOF	4975.63	4877.79	4532.77	4963.1	5604.63	5785	5015.49	5160.68	4869.43	4740.5	5035.84	4447.16
HS2ST1	8699.71	8011.53	8459.63	9321.07	10295.4	9258.37	8944.69	8704.72	8100.21	9322.36	9568.53	9195.43
LOC124904211	51.6303	66.8583	51.8725	41.4034	43.6199	40.8378	44.7617	55.2233	47.5571	37.9713	44.7443	65.9716
LOC100421465	11.4734	3.82047	15.4514	10.6163	12.7668	10.7468	4.36699	6.49686	9.30465	6.75044	15.1962	9.30369
LOC100421468	1.91223	1.91024	6.62202	3.18488	2.1278	2.14936	6.55049	1.08281	2.0677	11.8133	3.37693	3.38316
LINC01140	19.1223	10.5063	7.72569	14.8628	9.5751	12.8962	9.82573	9.7453	9.30465	13.5009	16.8846	11.8411
LINC02801	0	0	0	0	0	0	0	0	0	0	0	0
LMO4	3540.5	3310.44	3013.02	4475.81	4127.93	4468.52	4171.57	4214.3	3858.33	4116.93	4872.91	4289.85
LINC01364	1.91223	0	2.20734	4.2465	0	4.29872	6.55049	4.33124	0	5.90664	11.8192	0
LOC105378833	0	5.73071	6.62202	2.12325	0	2.14936	6.55049	17.325	0	1.68761	9.28655	0
LOC105378834	1.91223	0	0	0	2.1278	8.59744	0	2.16562	2.0677	1.68761	1.68846	1.69158
LOC107985408	0	0	0	0	0	0	0	0	0	0	0	0
LOC105378835	0.956117	0	0	4.2465	0	0	0	3.24843	0	0.843806	0	0
LOC107985518	0.956117	0	3.31101	2.12325	2.1278	1.07468	1.09175	0	2.0677	3.37522	5.06539	1.69158
LOC124904212	34.4202	26.7433	40.8358	57.3278	40.4282	41.9125	44.7617	34.6499	55.8279	39.6589	55.7193	52.439
LINC01773	0	0	0	0	0	0	0	0	0	0	0	0
LOC101927871	0	0	0	0	0	0	0	0	0	0	0	0
LOC105378836	0	0	0	0	1.0639	0	0	0	0	1.68761	0	0
LOC105378839	0	0	0	0	0	0	0	0	0	0	0	0
PKN2-AS1	1.91223	10.5063	5.51835	2.12325	10.639	4.29872	0	0	1.03385	1.68761	0.844232	3.38316
RPL36AP10	0	0	0	0	0	0	0	0	0	0	0	0
LOC105378838	0	0	0	0	0	0	0	0	0	0	0	0
PKN2	4221.26	3727.83	4415.79	4626.56	4845	4994.04	4632.29	4828.25	4327.7	3698.4	4054.85	4101.24
LOC124904213	15.2979	21.9677	26.4881	50.958	22.3419	25.7923	39.3029	17.325	12.4062	10.9695	21.95	10.9953
LOC124904214	131.944	100.287	152.307	104.039	70.2174	127.887	125.551	142.931	73.4033	78.4739	76.8251	115.027
GTF2B	1425.57	1420.26	1539.62	1506.45	1499.04	1384.19	1585.22	1441.22	1205.47	967.001	961.58	922.757
KYAT3	778.279	716.339	704.142	823.822	869.207	895.209	807.894	857.586	808.471	668.294	810.463	839.87
RBMXL1	597.573	551.103	550.732	600.88	633.021	681.347	670.333	677.839	635.818	657.325	621.355	612.352
LOC124904215	0	0	0	2.12325	0	0	0	0	0	0	0	0
GBP3	30.5957	29.6087	7.72569	14.8628	15.9585	20.4189	39.3029	20.5734	20.677	27.8456	14.3519	13.5326
LOC105378841	2.86835	0.955119	0	0	1.0639	0	0	0	2.0677	1.68761	4.22116	5.92053
GBP1	19.1223	5.73071	6.62202	14.8628	23.4058	31.1657	18.5597	17.325	26.8801	15.1885	8.44232	32.14
GBP2	13.3856	24.8331	16.5551	7.43138	14.8946	35.4644	10.9175	23.8218	8.2708	26.158	20.2616	25.3737
LOC112268267	3.82447	0.955119	0	1.06163	4.2556	1.07468	4.36699	0	0	2.53142	0	1.69158
LOC105378842	0	0	0	0	0	0	0	0	0	0	0	0
GBP7	0	0	0	0	0	0	0	0	1.03385	0	0	0
GBP4	0	0	0	0	0	0	0	0	0	0	0	0
LOC107985076	0	0	0	0	0	0	0	0	0	0	0	0
GBP5	1.91223	0	0	0	0	8.59744	0	4.33124	2.0677	0	0	1.69158
LOC729930	1.91223	0	0	0	0	0	0	0	0	0	0	0
GBP6	5.7367	7.64095	6.62202	0	0	0	0	2.16562	2.0677	0	1.68846	0
GBP1P1	1.91223	0	2.20734	0	0	0	0	3.24843	3.10155	0	1.68846	6.76632
LOC105378844	1.91223	22.9228	2.20734	16.986	8.5112	2.14936	9.82573	8.66249	9.30465	4.21903	14.3519	3.38316
LRRC8B	2592.03	2775.57	2684.13	2855.77	3018.29	3147.74	3090.74	2831.55	2839.99	2601.45	2855.19	2667.62
LOC124904216	5.7367	8.59607	6.62202	6.36975	5.3195	3.22404	8.73399	18.4078	15.5077	16.8761	5.90962	7.61211
LOC128092251	0	0	0	0	0	0	0	0	0	0	0	0
LRRC8C	66.9282	77.3646	77.2569	79.6219	44.6838	83.8251	70.9636	43.3124	90.9788	84.3806	97.9309	104.032
LRRC8C-DT	0	0	0	0	4.2556	0	0	2.16562	0	0	0	1.69158
LOC100505788	0	0	0	0	0	0	1.09175	0	0	0	0	0
LOC107985743	0	0.955119	4.41468	2.12325	0	0	1.09175	0	0	0	1.68846	1.69158
LOC124904833	0	0	0	0	0	0	0	0	0	0	0	0
LOC107985744	0	0	0	0	0	0	0	0	0	0	0	0
LOC101927975	0	0	0	0	0	0	2.1835	0	0	0	0	0
LRRC8D-DT	29.6396	19.1024	14.3477	31.8488	22.3419	15.0455	17.468	17.325	24.8124	32.0646	16.0404	31.2942
LRRC8D	1557.51	1479.48	1332.13	1282.44	1525.63	1406.76	1484.78	1149.94	1287.14	1997.29	1882.64	1977.46
LOC105378847	3.82447	0	8.82936	0	1.0639	8.59744	0	0	2.0677	10.1257	1.68846	3.38316
GEMIN8P4	45.8936	49.6662	30.9028	29.7255	23.4058	42.9872	17.468	33.5671	24.8124	33.7522	47.277	71.0464
ZNF326	1822.36	1719.21	1887.28	1908.8	1953.32	2076.28	1925.84	1907.91	1632.45	2165.21	2005.05	2117.86
LOC105378848	1.91223	3.82047	5.51835	2.12325	2.1278	1.07468	4.36699	2.16562	3.10155	0.843806	5.90962	7.61211
LOC105378849	30.5957	21.9677	41.9395	45.6499	26.5975	47.2859	32.7524	51.9749	27.9139	28.6894	31.2366	38.9063
LOC107985088	121.427	96.467	122.507	136.95	172.352	103.169	105.9	107.198	79.6064	61.5978	84.4232	93.8827
LOC105378850	0	0	0	0	0	0	0	0	0	0	0	0
LOC105378851	0	0	0	0	0	0	0	0	0	0	0	0
LINC02787	0	0	0	0	0	0	0	0	0	0	0	0
SNORD3G	0	0	0	0	0	0	0	0	0	0	0	0
BARHL2	0	0	0	0	0	0	0	0	0	0	0	0
LINC02609	61.1915	81.1851	46.3542	80.6836	93.6232	91.3478	82.9729	103.95	81.6741	85.2244	92.8655	100.649
LOC124904217	7.64893	0	1.10367	2.12325	0	3.22404	6.55049	2.16562	4.1354	4.21903	3.37693	5.92053
LINC02788	5.7367	5.73071	9.93303	5.30813	12.7668	8.59744	19.6515	8.66249	4.1354	15.1885	7.59809	18.6074
LINC01763	1.91223	0	2.20734	0	0	0	4.36699	0	0	0	0	0
ZNF644	3780.49	3521.52	3165.33	3868.56	3998.14	3878.52	3996.89	3618.75	3362.08	3971.79	4324.16	4105.47
RPL5P6	0	1.91024	0	0	0	0	0	0	2.0677	0	0	1.69158
HFM1	13.3856	5.73071	48.5615	11.6779	12.7668	13.9708	21.835	10.8281	3.10155	11.8133	36.302	24.5279
FEN1P1	0	0	2.20734	6.36975	0	0	4.36699	0	0	1.68761	1.68846	0
LOC124904661	0	0	0	0	0	0	0	0	0	0	0	0
LOC107985417	0	0	0	0	0	0	0	0	0	0	0	0
LOC105378856	0	0	0	1.06163	0	0	0	0	4.1354	0	0	0
CDC7	1110.05	1245.47	751.6	1044.64	1274.55	1407.83	1322.11	1213.83	1391.56	1820.93	1885.17	1709.34
LOC102723436	5.7367	3.82047	2.20734	0	2.1278	5.3734	4.36699	4.33124	5.16925	0.843806	5.90962	0.84579
WDR82P2	0	0	4.41468	0	4.2556	6.44808	4.36699	2.16562	0	1.68761	1.68846	1.69158
RPL39P13	0	1.91024	0	0	0	0	0	0	0	0	0	0
HSP90B3P	0	0	0	2.12325	6.3834	0	0	0	0	0	0	1.69158
TGFBR3	2814.81	2654.27	2659.85	3127.55	3218.3	3110.12	3095.11	3102.25	2662.16	2500.2	2655.95	2552.59
LOC124904659	7.64893	0	0	0	0	0	0	0	0	1.68761	0	0
BRDT	0	0	2.20734	0	0	0	0	0	0	0	0	0
LOC124904218	68.8404	81.1851	60.7019	92.3614	68.0896	102.095	79.6976	72.5483	84.7757	97.8814	92.0213	98.1117
EPHX4	120.471	125.121	59.5982	109.347	106.39	128.962	136.469	155.925	117.859	134.165	141.831	129.406
SETSIP	5.7367	9.55119	22.0734	14.8628	19.1502	2.14936	24.0185	8.66249	10.3385	20.2513	11.8192	10.1495
BTBD8	200.784	182.428	174.38	136.95	204.269	199.891	161.579	185.161	129.231	247.235	216.968	233.438
GAPDHP46	0	1.91024	2.20734	2.12325	0	0	0	0	0	0	0	3.38316
C1orf146	0.956117	12.4165	5.51835	0	0	1.07468	4.36699	4.33124	2.0677	4.21903	4.22116	16.9158
ACTBP12	0	0	0	0	0	0	0	0	0	0	0	0
GLMN	685.536	772.691	679.861	713.412	784.095	689.945	839.554	685.419	721.627	837.899	822.282	829.72
RPAP2	958.029	947.478	735.045	871.595	939.424	1030.62	944.362	696.247	750.575	948.437	991.973	1076.69
GFI1	52.5864	64.9481	44.1468	32.9104	63.834	66.6302	18.5597	34.6499	41.354	76.7863	72.604	69.3548
[truncated: 55,506 more rows]
