# Supplementary material for: Dual Role of Entamoeba histolytica KERP2 in Regulating Gene Expression and Modulating Host Cell Function for Intestinal Colonization
Source: Research Square preprint supplement (doi:10.21203/rs.3.rs-6191032/v1), 2025-04-28
Supplement: Supplementary file 6 [file f16f6a896973347f930c6117.xlsx]

## Sheet: Trial 1
Table S4. HA-KERP2 interactome in Caco-2
Trial 1
Identified Proteins (2199/2310)	Accession Number	Alternate ID	Molecular Weight	HAKERP2	HAmock	FC
Keratin, type I cytoskeletal 13 OS=Homo sapiens OX=9606 GN=KRT13 PE=1 SV=4	P13646	KRT13	50 kDa	18.572	0	#DIV/0!
60S ribosomal protein L10 OS=Homo sapiens OX=9606 GN=RPL10 PE=1 SV=2	F8W7C6	RPL10	19 kDa	14.592	0	#DIV/0!
Keratin, type I cytoskeletal 25 OS=Homo sapiens OX=9606 GN=KRT25 PE=1 SV=1	Q7Z3Z0	KRT25	49 kDa	8.6228	0	#DIV/0!
Serine/threonine-protein phosphatase PP1-beta catalytic subunit OS=Homo sapiens OX=9606 GN=PPP1CB PE=1 SV=3	P62140	PPP1CB	37 kDa	8.6228	0	#DIV/0!
Septin OS=Homo sapiens OX=9606 GN=SEPTIN8 PE=1 SV=1	A0A087X142 (+7)	SEPTIN8	49 kDa	5.9696	0	#DIV/0!
Serine/arginine-rich splicing factor 8 OS=Homo sapiens OX=9606 GN=SRSF8 PE=1 SV=1	Q9BRL6 (+1)	SRSF8	32 kDa	3.9797	0	#DIV/0!
Splicing factor Prp8, putative OS=Entamoeba histolytica HM-1:IMSS OX=294381 GN=EHI_060350 PE=4 SV=1	C4M6K0 (+2)	EHI_060350	266 kDa	6.6329	0	#DIV/0!
Insulin-degrading enzyme OS=Homo sapiens OX=9606 GN=IDE PE=1 SV=1	A0A3B3ISG5 (+2)	IDE	118 kDa	3.9797	0	#DIV/0!
Ras-related protein Rab-8B OS=Homo sapiens OX=9606 GN=RAB8B PE=1 SV=2	Q92930	RAB8B	24 kDa	5.3063	0	#DIV/0!
Laminin subunit alpha-5 OS=Homo sapiens OX=9606 GN=LAMA5 PE=1 SV=8	O15230	LAMA5	400 kDa	7.2962	0	#DIV/0!
60S ribosomal protein L10, putative OS=Entamoeba histolytica HM-1:IMSS OX=294381 GN=EHI_044810 PE=3 SV=1	C4LTA0	EHI_044810	24 kDa	5.3063	0	#DIV/0!
Isoform 6 of Amyloid-like protein 2 OS=Homo sapiens OX=9606 GN=APLP2	Q06481-6	APLP2	87 kDa	6.6329	0	#DIV/0!
Proliferating cell nuclear antigen OS=Homo sapiens OX=9606 GN=PCNA PE=1 SV=1	P12004	PCNA	29 kDa	3.9797	0	#DIV/0!
Nuclear pore complex protein Nup93 OS=Homo sapiens OX=9606 GN=NUP93 PE=1 SV=1	H3BVG0 (+1)	NUP93	100 kDa	4.643	0	#DIV/0!
DNA topoisomerase 2-beta OS=Homo sapiens OX=9606 GN=TOP2B PE=1 SV=3	Q02880 (+1)	TOP2B	183 kDa	3.9797	0	#DIV/0!
Centrosomal protein of 152 kDa OS=Homo sapiens OX=9606 GN=CEP152 PE=1 SV=4	O94986 (+3)	CEP152	196 kDa	3.9797	0	#DIV/0!
Dipeptidyl peptidase 1 OS=Homo sapiens OX=9606 GN=CTSC PE=4 SV=1	A0A7I2V2Q8 (+3)	CTSC	51 kDa	3.3165	0	#DIV/0!
Far upstream element-binding protein 1 OS=Homo sapiens OX=9606 GN=FUBP1 PE=1 SV=1	E9PEB5 (+2)	FUBP1	69 kDa	4.643	0	#DIV/0!
Glycerol-3-phosphate acyltransferase 1, mitochondrial OS=Homo sapiens OX=9606 GN=GPAM PE=1 SV=3	Q9HCL2	GPAM	94 kDa	2.6532	0	#DIV/0!
Ran GTPase-activating protein 1 OS=Homo sapiens OX=9606 GN=RANGAP1 PE=1 SV=1	P46060	RANGAP1	64 kDa	3.3165	0	#DIV/0!
GATOR complex protein MIOS OS=Homo sapiens OX=9606 GN=MIOS PE=1 SV=2	Q9NXC5	MIOS	99 kDa	3.9797	0	#DIV/0!
Tyrosine-protein kinase OS=Homo sapiens OX=9606 GN=YES1 PE=1 SV=1	J3QRU1	YES1	61 kDa	3.3165	0	#DIV/0!
Histone-lysine N-methyltransferase 2D OS=Homo sapiens OX=9606 GN=KMT2D PE=1 SV=2	O14686 (+1)	KMT2D	593 kDa	2.6532	0	#DIV/0!
Zinc finger CCCH domain-containing protein 11A OS=Homo sapiens OX=9606 GN=ZC3H11A PE=1 SV=3	O75152	ZC3H11A	89 kDa	3.3165	0	#DIV/0!
Serine protease FAM111B OS=Homo sapiens OX=9606 GN=FAM111B PE=1 SV=1	Q6SJ93	FAM111B	85 kDa	3.9797	0	#DIV/0!
Dynactin subunit 1 OS=Homo sapiens OX=9606 GN=DCTN1 PE=1 SV=1	E7EX90 (+6)	DCTN1	139 kDa	3.9797	0	#DIV/0!
High mobility group nucleosome-binding domain-containing protein 3 OS=Homo sapiens OX=9606 GN=HMGN3 PE=1 SV=1	A0A087WZE9	HMGN3	14 kDa	3.3165	0	#DIV/0!
40S ribosomal protein S4, putative OS=Entamoeba histolytica HM-1:IMSS OX=294381 GN=EHI_118170 PE=3 SV=1	B1N336 (+1)	EHI_118170	36 kDa	3.9797	0	#DIV/0!
Ubiquitin conjugation factor E4 A OS=Homo sapiens OX=9606 GN=UBE4A PE=1 SV=2	Q14139 (+1)	UBE4A	123 kDa	3.9797	0	#DIV/0!
40S ribosomal protein S2, putative OS=Entamoeba histolytica HM-1:IMSS OX=294381 GN=EHI_020280 PE=3 SV=1	C4M7U0 (+2)	EHI_020280	28 kDa	3.3165	0	#DIV/0!
Transforming protein RhoA OS=Homo sapiens OX=9606 GN=RHOA PE=1 SV=1	P61586	RHOA	22 kDa	3.9797	0	#DIV/0!
Wiskott-Aldrich syndrome protein family member 2 OS=Homo sapiens OX=9606 GN=WASF2 PE=1 SV=3	Q9Y6W5	WASF2	54 kDa	1.9899	0	#DIV/0!
ADP-ribosylation factor 3 OS=Homo sapiens OX=9606 GN=ARF3 PE=1 SV=2	P61204 (+2)	ARF3	21 kDa	3.3165	0	#DIV/0!
Isoform 4 of MAP7 domain-containing protein 1 OS=Homo sapiens OX=9606 GN=MAP7D1	Q3KQU3-4	MAP7D1	89 kDa	3.3165	0	#DIV/0!
Cullin-5 OS=Homo sapiens OX=9606 GN=CUL5 PE=1 SV=4	Q93034	CUL5	91 kDa	3.3165	0	#DIV/0!
Alpha-parvin OS=Homo sapiens OX=9606 GN=PARVA PE=1 SV=1	Q9NVD7	PARVA	42 kDa	2.6532	0	#DIV/0!
Tumor protein D54 OS=Homo sapiens OX=9606 GN=TPD52L2 PE=1 SV=1	A0A087WYR3	TPD52L2	24 kDa	2.6532	0	#DIV/0!
Signal recognition particle subunit SRP68 OS=Homo sapiens OX=9606 GN=SRP68 PE=1 SV=2	Q9UHB9 (+1)	SRP68	71 kDa	2.6532	0	#DIV/0!
Probable ATP-dependent RNA helicase DDX20 OS=Homo sapiens OX=9606 GN=DDX20 PE=1 SV=2	Q9UHI6	DDX20	92 kDa	3.9797	0	#DIV/0!
6-phosphofructo-2-kinase/fructose-2,6-bisphosphatase 2 OS=Homo sapiens OX=9606 GN=PFKFB2 PE=1 SV=2	O60825 (+1)	PFKFB2	58 kDa	4.643	0	#DIV/0!
Disintegrin and metalloproteinase domain-containing protein 9 OS=Homo sapiens OX=9606 GN=ADAM9 PE=4 SV=1	A0A7I2V3W3 (+3)	ADAM9	83 kDa	3.3165	0	#DIV/0!
Proteasome subunit beta type-6 OS=Homo sapiens OX=9606 GN=PSMB6 PE=1 SV=4	P28072	PSMB6	25 kDa	1.3266	0	#DIV/0!
Protein Shroom3 OS=Homo sapiens OX=9606 GN=SHROOM3 PE=1 SV=1	A0A2R8Y5P9 (+1)	SHROOM3	208 kDa	1.3266	0	#DIV/0!
Protein POF1B OS=Homo sapiens OX=9606 GN=POF1B PE=1 SV=3	Q8WVV4 (+1)	POF1B	68 kDa	1.3266	0	#DIV/0!
Fibronectin type-III domain-containing protein 3A OS=Homo sapiens OX=9606 GN=FNDC3A PE=1 SV=4	Q9Y2H6 (+1)	FNDC3A	132 kDa	2.6532	0	#DIV/0!
Alanine--tRNA ligase, mitochondrial OS=Homo sapiens OX=9606 GN=AARS2 PE=1 SV=1	Q5JTZ9	AARS2	107 kDa	2.6532	0	#DIV/0!
Aldehyde-alcohol dehydrogenase OS=Entamoeba histolytica HM-1:IMSS OX=294381 GN=EHI_150490 PE=3 SV=1	C4M230 (+1)	EHI_150490	96 kDa	1.9899	0	#DIV/0!
eEF1A lysine and N-terminal methyltransferase OS=Homo sapiens OX=9606 GN=EEF1AKNMT PE=1 SV=1	Q8N6R0 (+2)	EEF1AKNMT	79 kDa	3.3165	0	#DIV/0!
Translation initiation factor eIF-2B subunit gamma OS=Homo sapiens OX=9606 GN=EIF2B3 PE=1 SV=1	Q9NR50	EIF2B3	50 kDa	3.3165	0	#DIV/0!
Corneodesmosin OS=Homo sapiens OX=9606 GN=CDSN PE=1 SV=1	G8JLG2 (+2)	CDSN	52 kDa	1.3266	0	#DIV/0!
EH domain-containing protein 4 OS=Homo sapiens OX=9606 GN=EHD4 PE=1 SV=1	Q9H223	EHD4	61 kDa	2.6532	0	#DIV/0!
Polyadenylate-binding protein-interacting protein 1 OS=Homo sapiens OX=9606 GN=PAIP1 PE=1 SV=1	Q9H074	PAIP1	54 kDa	2.6532	0	#DIV/0!
Calcium-binding mitochondrial carrier protein SCaMC-1 OS=Homo sapiens OX=9606 GN=SLC25A24 PE=1 SV=2	Q6NUK1	SLC25A24	53 kDa	1.9899	0	#DIV/0!
Developmentally-regulated GTP-binding protein 2 OS=Homo sapiens OX=9606 GN=DRG2 PE=1 SV=1	P55039	DRG2	41 kDa	2.6532	0	#DIV/0!
Vacuolar protein sorting-associated protein 29 OS=Homo sapiens OX=9606 GN=VPS29 PE=1 SV=1	F8VXU5 (+2)	VPS29	24 kDa	3.3165	0	#DIV/0!
Nitric oxide synthase-interacting protein OS=Homo sapiens OX=9606 GN=NOSIP PE=1 SV=1	Q9Y314	NOSIP	33 kDa	1.9899	0	#DIV/0!
Protein IWS1 homolog OS=Homo sapiens OX=9606 GN=IWS1 PE=1 SV=2	Q96ST2 (+2)	IWS1	92 kDa	2.6532	0	#DIV/0!
Telomeric repeat-binding factor 2 (Fragment) OS=Homo sapiens OX=9606 GN=TERF2 PE=1 SV=1	H3BR06 (+2)	TERF2	32 kDa	1.9899	0	#DIV/0!
E3 ubiquitin-protein ligase UBR5 OS=Homo sapiens OX=9606 GN=UBR5 PE=1 SV=2	O95071 (+1)	UBR5	309 kDa	3.3165	0	#DIV/0!
Small subunit processome component 20 homolog OS=Homo sapiens OX=9606 GN=UTP20 PE=1 SV=3	O75691	UTP20	318 kDa	2.6532	0	#DIV/0!
Estradiol 17-beta-dehydrogenase 11 OS=Homo sapiens OX=9606 GN=HSD17B11 PE=1 SV=2	D6RCD0 (+1)	HSD17B11	28 kDa	3.3165	0	#DIV/0!
Centrosomal protein of 131 kDa OS=Homo sapiens OX=9606 GN=CEP131 PE=1 SV=1	I3L2J8 (+3)	CEP131	118 kDa	1.9899	0	#DIV/0!
Sorting nexin-5 OS=Homo sapiens OX=9606 GN=SNX5 PE=1 SV=1	Q9Y5X3	SNX5	47 kDa	2.6532	0	#DIV/0!
Dynein heavy chain 2, axonemal OS=Homo sapiens OX=9606 GN=DNAH2 PE=1 SV=3	Q9P225	DNAH2	508 kDa	2.6532	0	#DIV/0!
Cathepsin Z OS=Homo sapiens OX=9606 GN=CTSZ PE=1 SV=1	Q9UBR2	CTSZ	34 kDa	2.6532	0	#DIV/0!
Exosome complex exonuclease RRP44 OS=Homo sapiens OX=9606 GN=DIS3 PE=1 SV=2	Q9Y2L1	DIS3	109 kDa	2.6532	0	#DIV/0!
Golgin subfamily B member 1 OS=Homo sapiens OX=9606 GN=GOLGB1 PE=1 SV=2	Q14789 (+3)	GOLGB1	376 kDa	1.9899	0	#DIV/0!
Hepatoma-derived growth factor-related protein 2 OS=Homo sapiens OX=9606 GN=HDGFL2 PE=1 SV=1	Q7Z4V5 (+3)	HDGFL2	74 kDa	1.9899	0	#DIV/0!
Integrin beta-1 OS=Homo sapiens OX=9606 GN=ITGB1 PE=4 SV=1	A0A7I2V2F9 (+3)	ITGB1	88 kDa	2.6532	0	#DIV/0!
Tyrosine--tRNA ligase OS=Homo sapiens OX=9606 GN=YARS1 PE=1 SV=1	A0A6Q8PFX2 (+1)	YARS1	54 kDa	3.9797	0	#DIV/0!
Nicastrin OS=Homo sapiens OX=9606 GN=NCSTN PE=1 SV=2	Q92542 (+1)	NCSTN	78 kDa	3.3165	0	#DIV/0!
Phosphatidylserine decarboxylase OS=Homo sapiens OX=9606 GN=PISD PE=1 SV=1	B1AKM6	PISD	30 kDa	3.3165	0	#DIV/0!
Elongation of very long chain fatty acids protein 1 OS=Homo sapiens OX=9606 GN=ELOVL1 PE=1 SV=1	Q9BW60	ELOVL1	33 kDa	2.6532	0	#DIV/0!
BAG family molecular chaperone regulator 2 OS=Homo sapiens OX=9606 GN=BAG2 PE=1 SV=1	O95816	BAG2	24 kDa	2.6532	0	#DIV/0!
Pitrilysin metalloproteinase 1 OS=Homo sapiens OX=9606 GN=PITRM1 PE=1 SV=2	A0A0A0MRX9 (+7)	PITRM1	94 kDa	3.3165	0	#DIV/0!
Lamin-B2 OS=Homo sapiens OX=9606 GN=LMNB2 PE=1 SV=4	Q03252	LMNB2	70 kDa	2.6532	0	#DIV/0!
Kinesin-like protein KIF26B (Fragment) OS=Homo sapiens OX=9606 GN=KIF26B PE=1 SV=1	A0A0G2JR66 (+3)	KIF26B	209 kDa	1.3266	0	#DIV/0!
Protein S100-A8 OS=Homo sapiens OX=9606 GN=S100A8 PE=1 SV=1	P05109	S100A8	11 kDa	1.9899	0	#DIV/0!
Syndetin OS=Homo sapiens OX=9606 GN=VPS50 PE=1 SV=3	Q96JG6 (+1)	VPS50	111 kDa	1.9899	0	#DIV/0!
Ribonuclease H2 subunit B OS=Homo sapiens OX=9606 GN=RNASEH2B PE=1 SV=3	A0A087WXR7 (+4)	RNASEH2B	32 kDa	1.9899	0	#DIV/0!
Exosome complex component RRP45 OS=Homo sapiens OX=9606 GN=EXOSC9 PE=1 SV=1	D6RIY6 (+2)	EXOSC9	47 kDa	2.6532	0	#DIV/0!
Alpha-centractin OS=Homo sapiens OX=9606 GN=ACTR1A PE=1 SV=1	P61163	ACTR1A	43 kDa	2.6532	0	#DIV/0!
Isobutyryl-CoA dehydrogenase, mitochondrial OS=Homo sapiens OX=9606 GN=ACAD8 PE=1 SV=1	Q9UKU7	ACAD8	45 kDa	1.9899	0	#DIV/0!
Annexin A11 OS=Homo sapiens OX=9606 GN=ANXA11 PE=1 SV=1	P50995 (+1)	ANXA11	54 kDa	1.9899	0	#DIV/0!
Exosome complex component RRP42 OS=Homo sapiens OX=9606 GN=EXOSC7 PE=1 SV=3	Q15024	EXOSC7	32 kDa	2.6532	0	#DIV/0!
3'-5' exoribonuclease 1 OS=Homo sapiens OX=9606 GN=ERI1 PE=1 SV=3	Q8IV48	ERI1	40 kDa	2.6532	0	#DIV/0!
Cleavage and polyadenylation specificity factor subunit 5 OS=Homo sapiens OX=9606 GN=NUDT21 PE=1 SV=1	O43809	NUDT21	26 kDa	1.9899	0	#DIV/0!
Probable ATP-dependent RNA helicase DDX41 OS=Homo sapiens OX=9606 GN=DDX41 PE=1 SV=2	Q9UJV9	DDX41	70 kDa	1.9899	0	#DIV/0!
Pinin OS=Homo sapiens OX=9606 GN=PNN PE=1 SV=5	Q9H307	PNN	82 kDa	1.9899	0	#DIV/0!
Very-long-chain (3R)-3-hydroxyacyl-CoA dehydratase 2 OS=Homo sapiens OX=9606 GN=HACD2 PE=1 SV=1	Q6Y1H2	HACD2	28 kDa	1.3266	0	#DIV/0!
Spermidine synthase OS=Homo sapiens OX=9606 GN=SRM PE=1 SV=1	P19623	SRM	34 kDa	1.9899	0	#DIV/0!
COP9 signalosome complex subunit 1 OS=Homo sapiens OX=9606 GN=GPS1 PE=1 SV=1	A0A096LP07 (+6)	GPS1	55 kDa	1.9899	0	#DIV/0!
ER membrane protein complex subunit 8 OS=Homo sapiens OX=9606 GN=EMC8 PE=1 SV=1	O43402	EMC8	24 kDa	1.9899	0	#DIV/0!
Non-specific serine/threonine protein kinase (Fragment) OS=Homo sapiens OX=9606 GN=EIF2AK4 PE=1 SV=1	H0YME5 (+2)	EIF2AK4	161 kDa	1.9899	0	#DIV/0!
U5 small nuclear ribonucleoprotein 40 kDa protein OS=Homo sapiens OX=9606 GN=SNRNP40 PE=1 SV=1	Q96DI7	SNRNP40	39 kDa	1.9899	0	#DIV/0!
Golgi SNAP receptor complex member 2 (Fragment) OS=Homo sapiens OX=9606 GN=GOSR2 PE=4 SV=1	A0A1W2PQ38	GOSR2	15 kDa	2.6532	0	#DIV/0!
Chromodomain-helicase-DNA-binding protein 1 OS=Homo sapiens OX=9606 GN=CHD1 PE=1 SV=2	O14646	CHD1	197 kDa	1.9899	0	#DIV/0!
Growth factor receptor-bound protein 2 OS=Homo sapiens OX=9606 GN=GRB2 PE=1 SV=1	P62993 (+1)	GRB2	25 kDa	1.9899	0	#DIV/0!
Histone-lysine N-methyltransferase SETD2 OS=Homo sapiens OX=9606 GN=SETD2 PE=1 SV=3	Q9BYW2	SETD2	288 kDa	1.9899	0	#DIV/0!
Chromobox protein homolog 1 (Fragment) OS=Homo sapiens OX=9606 GN=CBX1 PE=1 SV=1	B5MD17 (+2)	CBX1	19 kDa	1.9899	0	#DIV/0!
Lysosomal-trafficking regulator OS=Homo sapiens OX=9606 GN=LYST PE=1 SV=3	Q99698	LYST	429 kDa	1.3266	0	#DIV/0!
Complex I assembly factor ACAD9, mitochondrial OS=Homo sapiens OX=9606 GN=ACAD9 PE=1 SV=1	Q9H845	ACAD9	69 kDa	1.9899	0	#DIV/0!
Rab3 GTPase-activating protein catalytic subunit OS=Homo sapiens OX=9606 GN=RAB3GAP1 PE=1 SV=3	Q15042 (+2)	RAB3GAP1	111 kDa	1.9899	0	#DIV/0!
Mitochondrial-processing peptidase subunit beta OS=Homo sapiens OX=9606 GN=PMPCB PE=1 SV=2	O75439	PMPCB	54 kDa	1.3266	0	#DIV/0!
NEDD4-binding protein 2 (Fragment) OS=Homo sapiens OX=9606 GN=N4BP2 PE=1 SV=1	H0YA93 (+2)	N4BP2	158 kDa	2.6532	0	#DIV/0!
Endoplasmic reticulum-Golgi intermediate compartment protein 1 OS=Homo sapiens OX=9606 GN=ERGIC1 PE=1 SV=1	Q969X5 (+1)	ERGIC1	33 kDa	1.9899	0	#DIV/0!
Isoform 3 of Cysteine--tRNA ligase, cytoplasmic OS=Homo sapiens OX=9606 GN=CARS1	P49589-3	CARS1	95 kDa	1.9899	0	#DIV/0!
Vitronectin OS=Homo sapiens OX=9606 GN=VTN PE=1 SV=1	P04004	VTN	54 kDa	1.3266	0	#DIV/0!
Protein HEXIM1 OS=Homo sapiens OX=9606 GN=HEXIM1 PE=1 SV=1	O94992	HEXIM1	41 kDa	2.6532	0	#DIV/0!
Terminal uridylyltransferase 4 OS=Homo sapiens OX=9606 GN=TUT4 PE=1 SV=1	A0A0C4DFM7 (+1)	TUT4	185 kDa	2.6532	0	#DIV/0!
Nucleoside diphosphate-linked moiety X motif 19 OS=Homo sapiens OX=9606 GN=NUDT19 PE=1 SV=1	A8MXV4	NUDT19	42 kDa	1.3266	0	#DIV/0!
Sec1 family domain-containing protein 1 OS=Homo sapiens OX=9606 GN=SCFD1 PE=4 SV=1	A0A7I2V2U5 (+1)	SCFD1	55 kDa	2.6532	0	#DIV/0!
Dynamin-like 120 kDa protein, form S1 OS=Homo sapiens OX=9606 GN=OPA1 PE=1 SV=1	A0A2R8YDM2 (+7)	OPA1	112 kDa	2.6532	0	#DIV/0!
WD repeat-containing protein 37 OS=Homo sapiens OX=9606 GN=WDR37 PE=1 SV=1	A0A3B3IT47 (+2)	WDR37	64 kDa	2.6532	0	#DIV/0!
Pre-B-cell leukemia transcription factor-interacting protein 1 OS=Homo sapiens OX=9606 GN=PBXIP1 PE=1 SV=1	Q96AQ6 (+1)	PBXIP1	81 kDa	2.6532	0	#DIV/0!
GTPase-activating protein and VPS9 domain-containing protein 1 OS=Homo sapiens OX=9606 GN=GAPVD1 PE=1 SV=1	B0QZ65 (+9)	GAPVD1	56 kDa	1.9899	0	#DIV/0!
Serine/threonine-protein phosphatase 6 catalytic subunit OS=Homo sapiens OX=9606 GN=PPP6C PE=1 SV=1	O00743 (+2)	PPP6C	35 kDa	1.9899	0	#DIV/0!
Proteasomal ubiquitin receptor ADRM1 OS=Homo sapiens OX=9606 GN=ADRM1 PE=1 SV=2	Q16186	ADRM1	42 kDa	2.6532	0	#DIV/0!
Histone deacetylase 2 OS=Homo sapiens OX=9606 GN=HDAC2 PE=1 SV=2	Q92769 (+1)	HDAC2	55 kDa	1.9899	0	#DIV/0!
Peptidyl-prolyl cis-trans isomerase-like 4 OS=Homo sapiens OX=9606 GN=PPIL4 PE=1 SV=1	Q8WUA2	PPIL4	57 kDa	1.9899	0	#DIV/0!
ATP-dependent translocase ABCB1 OS=Homo sapiens OX=9606 GN=ABCB1 PE=1 SV=3	P08183 (+1)	ABCB1	141 kDa	2.6532	0	#DIV/0!
Vesicle-associated membrane protein 8 OS=Homo sapiens OX=9606 GN=VAMP8 PE=1 SV=1	Q9BV40	VAMP8	11 kDa	1.9899	0	#DIV/0!
Centromere/kinetochore protein zw10 homolog OS=Homo sapiens OX=9606 GN=ZW10 PE=1 SV=3	O43264	ZW10	89 kDa	2.6532	0	#DIV/0!
Alcohol dehydrogenase class-3 OS=Homo sapiens OX=9606 GN=ADH5 PE=1 SV=4	P11766	ADH5	40 kDa	2.6532	0	#DIV/0!
Dolichyl-diphosphooligosaccharide--protein glycosyltransferase subunit DAD1 OS=Homo sapiens OX=9606 GN=DAD1 PE=1 SV=1	F5GXX5 (+1)	DAD1	10 kDa	1.9899	0	#DIV/0!
Adenylate kinase 2, mitochondrial OS=Homo sapiens OX=9606 GN=AK2 PE=1 SV=1	F8W1A4 (+3)	AK2	26 kDa	3.3165	0	#DIV/0!
Nuclear mitotic apparatus protein 1 OS=Homo sapiens OX=9606 GN=NUMA1 PE=1 SV=1	A0A087WY61 (+1)	NUMA1	236 kDa	3.3165	0	#DIV/0!
Epithelial cell adhesion molecule OS=Homo sapiens OX=9606 GN=EPCAM PE=1 SV=1	B5MCA4 (+1)	EPCAM	38 kDa	2.6532	0	#DIV/0!
Sorting nexin-1 OS=Homo sapiens OX=9606 GN=SNX1 PE=1 SV=1	H0YK42 (+3)	SNX1	36 kDa	1.9899	0	#DIV/0!
Guanine nucleotide-binding protein G(i) subunit alpha-2 OS=Homo sapiens OX=9606 GN=GNAI2 PE=1 SV=3	P04899 (+1)	GNAI2	40 kDa	2.6532	0	#DIV/0!
Sorting nexin-8 OS=Homo sapiens OX=9606 GN=SNX8 PE=1 SV=1	Q9Y5X2	SNX8	53 kDa	2.6532	0	#DIV/0!
PDZ and LIM domain protein 1 OS=Homo sapiens OX=9606 GN=PDLIM1 PE=1 SV=4	O00151	PDLIM1	36 kDa	2.6532	0	#DIV/0!
26S proteasome non-ATPase regulatory subunit 4 OS=Homo sapiens OX=9606 GN=PSMD4 PE=1 SV=1	P55036 (+1)	PSMD4	41 kDa	1.9899	0	#DIV/0!
Centrosomal protein of 290 kDa OS=Homo sapiens OX=9606 GN=CEP290 PE=1 SV=2	A0A5F9ZHU6 (+8)	CEP290	286 kDa	2.6532	0	#DIV/0!
SUMO-activating enzyme subunit 1 OS=Homo sapiens OX=9606 GN=SAE1 PE=1 SV=1	A0A590UK93 (+7)	SAE1	23 kDa	2.6532	0	#DIV/0!
Dihydroorotate dehydrogenase (quinone), mitochondrial OS=Homo sapiens OX=9606 GN=DHODH PE=1 SV=3	Q02127	DHODH	43 kDa	2.6532	0	#DIV/0!
39S ribosomal protein L37, mitochondrial OS=Homo sapiens OX=9606 GN=MRPL37 PE=1 SV=2	Q9BZE1	MRPL37	48 kDa	3.3165	0	#DIV/0!
Annexin A4 OS=Homo sapiens OX=9606 GN=ANXA4 PE=1 SV=4	P09525	ANXA4	36 kDa	2.6532	0	#DIV/0!
KERP2-1-164 Truncated DEK_C domain-containing protein OS=Entamoeba histolytica HM-1:IMSS OX=294381 GN=EHI_065630 PE=4 SV=1	1C4LZX9 (+3)	EHI_065630	21 kDa	3.3165	0	#DIV/0!
Golgin subfamily A member 2 OS=Homo sapiens OX=9606 GN=GOLGA2 PE=1 SV=1	A0A6Q8KRG2 (+2)	GOLGA2	112 kDa	3.3165	0	#DIV/0!
Heat shock protein beta-1 OS=Homo sapiens OX=9606 GN=HSPB1 PE=1 SV=1	A0A6Q8PFK8 (+1)	HSPB1	22 kDa	1.3266	0	#DIV/0!
E3 SUMO-protein ligase RanBP2 OS=Homo sapiens OX=9606 GN=RANBP2 PE=1 SV=2	P49792	RANBP2	358 kDa	1.9899	0	#DIV/0!
NADP-dependent malic enzyme OS=Homo sapiens OX=9606 GN=ME1 PE=1 SV=1	P48163	ME1	64 kDa	1.3266	0	#DIV/0!
Golgin subfamily A member 6D OS=Homo sapiens OX=9606 GN=GOLGA6D PE=1 SV=2	A0A087WXI9 (+4)	GOLGA6D	72 kDa	1.3266	0	#DIV/0!
Nebulin OS=Homo sapiens OX=9606 GN=NEB PE=1 SV=1	A0A087X1N7 (+2)	NEB	991 kDa	1.3266	0	#DIV/0!
Trinucleotide repeat-containing gene 6B protein OS=Homo sapiens OX=9606 GN=TNRC6B PE=1 SV=4	Q9UPQ9 (+1)	TNRC6B	194 kDa	2.6532	0	#DIV/0!
Proteasome adapter and scaffold protein ECM29 OS=Homo sapiens OX=9606 GN=ECPAS PE=1 SV=1	J3KN16 (+1)	ECPAS	224 kDa	1.9899	0	#DIV/0!
Myosin regulatory light chain 12A OS=Homo sapiens OX=9606 GN=MYL12A PE=1 SV=1	J3QRS3 (+2)	MYL12A	20 kDa	1.9899	0	#DIV/0!
Mitochondrial carrier homolog 1 OS=Homo sapiens OX=9606 GN=MTCH1 PE=1 SV=1	Q9NZJ7 (+1)	MTCH1	42 kDa	1.9899	0	#DIV/0!
Laminin subunit alpha-1 OS=Homo sapiens OX=9606 GN=LAMA1 PE=1 SV=2	P25391	LAMA1	337 kDa	1.3266	0	#DIV/0!
Endophilin-A2 OS=Homo sapiens OX=9606 GN=SH3GL1 PE=1 SV=1	Q99961 (+1)	SH3GL1	41 kDa	1.3266	0	#DIV/0!
Xaa-Pro aminopeptidase 3 OS=Homo sapiens OX=9606 GN=XPNPEP3 PE=1 SV=1	Q9NQH7 (+2)	XPNPEP3	57 kDa	1.9899	0	#DIV/0!
Diadenosine tetraphosphate synthetase OS=Homo sapiens OX=9606 GN=GARS1 PE=1 SV=1	A0A6Q8PGA8 (+6)	GARS1	77 kDa	1.9899	0	#DIV/0!
Serine/threonine-protein phosphatase 2A 55 kDa regulatory subunit B alpha isoform OS=Homo sapiens OX=9606 GN=PPP2R2A PE=1 SV=1	P63151 (+1)	PPP2R2A	52 kDa	1.9899	0	#DIV/0!
Complement C4-A OS=Homo sapiens OX=9606 GN=C4A PE=1 SV=2	P0C0L4 (+1)	C4A	193 kDa	1.9899	0	#DIV/0!
Isocitrate dehydrogenase [NAD] subunit, mitochondrial OS=Homo sapiens OX=9606 GN=IDH3B PE=1 SV=1	A0A087WZN1 (+3)	IDH3B	42 kDa	1.9899	0	#DIV/0!
RNA helicase OS=Homo sapiens OX=9606 GN=DDX55 PE=1 SV=1	F5H5U2 (+1)	DDX55	65 kDa	1.9899	0	#DIV/0!
Non-specific serine/threonine protein kinase (Fragment) OS=Homo sapiens OX=9606 GN=TRIO PE=1 SV=2	E7EPJ7 (+3)	TRIO	286 kDa	1.9899	0	#DIV/0!
Vacuolar protein sorting-associated protein 52 homolog OS=Homo sapiens OX=9606 GN=VPS52 PE=1 SV=1	Q8N1B4 (+1)	VPS52	82 kDa	1.3266	0	#DIV/0!
Lethal(2) giant larvae protein homolog 1 OS=Homo sapiens OX=9606 GN=LLGL1 PE=1 SV=1	A0A087WW77 (+1)	LLGL1	114 kDa	1.3266	0	#DIV/0!
GrpE protein homolog 1, mitochondrial OS=Homo sapiens OX=9606 GN=GRPEL1 PE=1 SV=2	Q9HAV7	GRPEL1	24 kDa	1.3266	0	#DIV/0!
39S ribosomal protein L45, mitochondrial OS=Homo sapiens OX=9606 GN=MRPL45 PE=1 SV=1	A0A087WU62 (+3)	MRPL45	29 kDa	1.3266	0	#DIV/0!
Solute carrier family 12 member 2 OS=Homo sapiens OX=9606 GN=SLC12A2 PE=1 SV=1	P55011 (+1)	SLC12A2	131 kDa	1.3266	0	#DIV/0!
Protein phosphatase 1 regulatory subunit 12A OS=Homo sapiens OX=9606 GN=PPP1R12A PE=1 SV=1	O14974 (+2)	PPP1R12A	115 kDa	1.9899	0	#DIV/0!
Podocalyxin OS=Homo sapiens OX=9606 GN=PODXL PE=1 SV=2	O00592 (+1)	PODXL	59 kDa	1.3266	0	#DIV/0!
EBNA1 binding protein 2, isoform CRA_d OS=Homo sapiens OX=9606 GN=EBNA1BP2 PE=1 SV=1	H7C2Q8 (+1)	EBNA1BP2	41 kDa	1.3266	0	#DIV/0!
Leucine-rich repeat-containing protein 1 OS=Homo sapiens OX=9606 GN=LRRC1 PE=1 SV=1	Q9BTT6	LRRC1	59 kDa	1.3266	0	#DIV/0!
Na(+)/H(+) exchange regulatory cofactor NHE-RF1 OS=Homo sapiens OX=9606 GN=SLC9A3R1 PE=1 SV=4	O14745	SLC9A3R1	39 kDa	1.9899	0	#DIV/0!
Methionyl-tRNA formyltransferase, mitochondrial OS=Homo sapiens OX=9606 GN=MTFMT PE=2 SV=2	Q96DP5	MTFMT	44 kDa	1.3266	0	#DIV/0!
Actin-related protein 2/3 complex subunit 3 OS=Homo sapiens OX=9606 GN=ARPC3 PE=1 SV=3	O15145	ARPC3	21 kDa	1.3266	0	#DIV/0!
Chromobox protein homolog 5 OS=Homo sapiens OX=9606 GN=CBX5 PE=1 SV=1	P45973	CBX5	22 kDa	1.9899	0	#DIV/0!
Chitinase domain-containing protein 1 OS=Homo sapiens OX=9606 GN=CHID1 PE=1 SV=1	Q9BWS9 (+2)	CHID1	45 kDa	1.9899	0	#DIV/0!
SEC23-interacting protein OS=Homo sapiens OX=9606 GN=SEC23IP PE=1 SV=1	Q9Y6Y8	SEC23IP	111 kDa	1.3266	0	#DIV/0!
Very long-chain specific acyl-CoA dehydrogenase, mitochondrial OS=Homo sapiens OX=9606 GN=ACADVL PE=1 SV=1	P49748 (+1)	ACADVL	70 kDa	1.3266	0	#DIV/0!
U3 small nucleolar RNA-interacting protein 2 OS=Homo sapiens OX=9606 GN=RRP9 PE=1 SV=1	O43818	RRP9	52 kDa	1.3266	0	#DIV/0!
39S ribosomal protein L23, mitochondrial OS=Homo sapiens OX=9606 GN=MRPL23 PE=1 SV=1	A6NJD9 (+3)	MRPL23	19 kDa	1.3266	0	#DIV/0!
26S proteasome non-ATPase regulatory subunit 5 OS=Homo sapiens OX=9606 GN=PSMD5 PE=1 SV=3	Q16401 (+1)	PSMD5	56 kDa	1.3266	0	#DIV/0!
Dynein light chain 2, cytoplasmic OS=Homo sapiens OX=9606 GN=DYNLL2 PE=1 SV=1	Q96FJ2	DYNLL2	10 kDa	1.3266	0	#DIV/0!
Serine/threonine-protein kinase N2 OS=Homo sapiens OX=9606 GN=PKN2 PE=1 SV=1	Q16513 (+2)	PKN2	112 kDa	1.3266	0	#DIV/0!
Transcriptional repressor protein YY1 (Fragment) OS=Homo sapiens OX=9606 GN=YY1 PE=1 SV=1	H0YJV7 (+1)	YY1	21 kDa	1.3266	0	#DIV/0!
Cadherin-17 OS=Homo sapiens OX=9606 GN=CDH17 PE=1 SV=3	Q12864	CDH17	92 kDa	1.9899	0	#DIV/0!
Asteroid homolog 1 (Drosophila), isoform CRA_c OS=Homo sapiens OX=9606 GN=ASTE1 PE=1 SV=1	D6RG30 (+2)	ASTE1	80 kDa	1.9899	0	#DIV/0!
Leucine-rich repeat protein SHOC-2 OS=Homo sapiens OX=9606 GN=SHOC2 PE=1 SV=2	Q9UQ13 (+1)	SHOC2	65 kDa	1.9899	0	#DIV/0!
eIF-2B GDP-GTP exchange factor subunit epsilon OS=Homo sapiens OX=9606 GN=EIF2B5 PE=1 SV=1	A0A3B3IUB1 (+1)	EIF2B5	81 kDa	1.3266	0	#DIV/0!
Grainin 1 OS=Entamoeba histolytica HM-1:IMSS OX=294381 GN=EHI_167300 PE=4 SV=1	C4MAF9 (+1)	EHI_167300	24 kDa	0	0	#DIV/0!
Protein phosphatase 1H OS=Homo sapiens OX=9606 GN=PPM1H PE=1 SV=2	Q9ULR3	PPM1H	56 kDa	1.9899	0	#DIV/0!
Glucosamine-6-phosphate isomerase 1 OS=Homo sapiens OX=9606 GN=GNPDA1 PE=1 SV=1	P46926 (+1)	GNPDA1	33 kDa	1.3266	0	#DIV/0!
NAD kinase 2, mitochondrial OS=Homo sapiens OX=9606 GN=NADK2 PE=1 SV=2	Q4G0N4 (+1)	NADK2	49 kDa	1.9899	0	#DIV/0!
Tubulin--tyrosine ligase-like protein 12 OS=Homo sapiens OX=9606 GN=TTLL12 PE=1 SV=2	Q14166	TTLL12	74 kDa	1.3266	0	#DIV/0!
Inhibitor of Bruton tyrosine kinase OS=Homo sapiens OX=9606 GN=IBTK PE=1 SV=1	E7EPI0 (+1)	IBTK	149 kDa	1.9899	0	#DIV/0!
Prolactin regulatory element-binding protein (Fragment) OS=Homo sapiens OX=9606 GN=PREB PE=1 SV=1	H7C0W3	PREB	19 kDa	1.9899	0	#DIV/0!
THAP domain-containing protein 11 OS=Homo sapiens OX=9606 GN=THAP11 PE=1 SV=2	Q96EK4	THAP11	34 kDa	1.9899	0	#DIV/0!
Serine protease FAM111A OS=Homo sapiens OX=9606 GN=FAM111A PE=1 SV=2	Q96PZ2	FAM111A	70 kDa	1.3266	0	#DIV/0!
Activator of 90 kDa heat shock protein ATPase homolog 1 (Fragment) OS=Homo sapiens OX=9606 GN=AHSA1 PE=1 SV=1	G3V438 (+1)	AHSA1	23 kDa	1.9899	0	#DIV/0!
DNA-directed RNA polymerase III subunit RPC1 OS=Homo sapiens OX=9606 GN=POLR3A PE=1 SV=2	O14802	POLR3A	156 kDa	1.9899	0	#DIV/0!
von Willebrand factor A domain-containing protein 3B (Fragment) OS=Homo sapiens OX=9606 GN=VWA3B PE=1 SV=1	H0YEM4	VWA3B	81 kDa	1.3266	0	#DIV/0!
Vacuolar protein sorting-associated protein 11 homolog OS=Homo sapiens OX=9606 GN=VPS11 PE=1 SV=1	A0A087WXL6 (+1)	VPS11	108 kDa	1.9899	0	#DIV/0!
Protein ZNRD2 (Fragment) OS=Homo sapiens OX=9606 GN=ZNRD2 PE=1 SV=1	H0YEB6 (+1)	ZNRD2	21 kDa	1.9899	0	#DIV/0!
Interferon epsilon OS=Homo sapiens OX=9606 GN=IFNE PE=2 SV=1	Q86WN2	IFNE	24 kDa	1.3266	0	#DIV/0!
Polyglutamine-binding protein 1 OS=Homo sapiens OX=9606 GN=PQBP1 PE=1 SV=1	O60828 (+2)	PQBP1	30 kDa	1.3266	0	#DIV/0!
Lipid droplet-regulating VLDL assembly factor AUP1 OS=Homo sapiens OX=9606 GN=AUP1 PE=1 SV=2	Q9Y679	AUP1	46 kDa	1.9899	0	#DIV/0!
Peripheral plasma membrane protein CASK OS=Homo sapiens OX=9606 GN=CASK PE=1 SV=2	A0A2R8Y6F8 (+13)	CASK	80 kDa	1.9899	0	#DIV/0!
Oxysterol-binding protein 1 OS=Homo sapiens OX=9606 GN=OSBP PE=1 SV=1	P22059	OSBP	89 kDa	1.9899	0	#DIV/0!
Zinc phosphodiesterase ELAC protein 2 OS=Homo sapiens OX=9606 GN=ELAC2 PE=1 SV=2	Q9BQ52 (+1)	ELAC2	92 kDa	1.9899	0	#DIV/0!
60S ribosomal protein L18a OS=Entamoeba histolytica HM-1:IMSS OX=294381 GN=EHI_035600 PE=3 SV=1	C4LXZ0	EHI_035600	20 kDa	1.9899	0	#DIV/0!
Isoform 10 of CCR4-NOT transcription complex subunit 4 OS=Homo sapiens OX=9606 GN=CNOT4	O95628-10 (+3)	CNOT4	78 kDa	1.9899	0	#DIV/0!
Disrupted in schizophrenia 1 isoform 47 OS=Homo sapiens OX=9606 GN=TSNAX-DISC1 PE=2 SV=1	C4P0D4 (+3)	TSNAX-DISC1	16 kDa	1.9899	0	#DIV/0!
HIRA-interacting protein 3 OS=Homo sapiens OX=9606 GN=HIRIP3 PE=1 SV=3	Q9BW71	HIRIP3	62 kDa	1.3266	0	#DIV/0!
Periplakin OS=Homo sapiens OX=9606 GN=PPL PE=1 SV=1	K7EKI8 (+1)	PPL	204 kDa	1.9899	0	#DIV/0!
Mitochondrial potassium channel OS=Homo sapiens OX=9606 GN=CCDC51 PE=1 SV=2	Q96ER9 (+1)	CCDC51	46 kDa	1.3266	0	#DIV/0!
Zinc finger CCHC domain-containing protein 9 OS=Homo sapiens OX=9606 GN=ZCCHC9 PE=1 SV=2	Q8N567	ZCCHC9	30 kDa	1.3266	0	#DIV/0!
Golgi to ER traffic protein 4 homolog OS=Homo sapiens OX=9606 GN=GET4 PE=1 SV=1	Q7L5D6	GET4	37 kDa	1.9899	0	#DIV/0!
BRISC and BRCA1-A complex member 1 (Fragment) OS=Homo sapiens OX=9606 GN=BABAM1 PE=1 SV=1	M0R0I0 (+6)	BABAM1	25 kDa	1.3266	0	#DIV/0!
Profilin OS=Homo sapiens OX=9606 GN=PFN1 PE=1 SV=1	K7EJ44 (+1)	PFN1	11 kDa	1.9899	0	#DIV/0!
Aflatoxin B1 aldehyde reductase member 2 (Fragment) OS=Homo sapiens OX=9606 GN=AKR7A2 PE=1 SV=1	H3BLU7 (+1)	AKR7A2	35 kDa	1.9899	0	#DIV/0!
Translation machinery-associated protein 16 OS=Homo sapiens OX=9606 GN=TMA16 PE=1 SV=1	D6RA57 (+2)	TMA16	17 kDa	1.9899	0	#DIV/0!
Syndecan-4 OS=Homo sapiens OX=9606 GN=SDC4 PE=1 SV=2	P31431 (+1)	SDC4	22 kDa	1.9899	0	#DIV/0!
Vacuolar protein-sorting-associated protein 36 OS=Homo sapiens OX=9606 GN=VPS36 PE=1 SV=1	A0A3B3ISW7 (+1)	VPS36	37 kDa	1.3266	0	#DIV/0!
Paired amphipathic helix protein Sin3a OS=Homo sapiens OX=9606 GN=SIN3A PE=1 SV=2	Q96ST3	SIN3A	145 kDa	1.9899	0	#DIV/0!
Zinc finger CCCH domain-containing protein 4 (Fragment) OS=Homo sapiens OX=9606 GN=ZC3H4 PE=1 SV=1	M0QY97 (+1)	ZC3H4	96 kDa	1.9899	0	#DIV/0!
Isoform 3 of Huntingtin-interacting protein 1 OS=Homo sapiens OX=9606 GN=HIP1	O00291-3	HIP1	111 kDa	1.9899	0	#DIV/0!
Brefeldin A-inhibited guanine nucleotide-exchange protein 3 OS=Homo sapiens OX=9606 GN=ARFGEF3 PE=1 SV=3	Q5TH69	ARFGEF3	241 kDa	1.3266	0	#DIV/0!
Surfeit locus protein 4 OS=Homo sapiens OX=9606 GN=SURF4 PE=1 SV=3	O15260 (+2)	SURF4	30 kDa	1.9899	0	#DIV/0!
28S ribosomal protein S18b, mitochondrial OS=Homo sapiens OX=9606 GN=MRPS18B PE=1 SV=1	Q9Y676	MRPS18B	29 kDa	1.9899	0	#DIV/0!
Pachytene checkpoint protein 2 homolog OS=Homo sapiens OX=9606 GN=TRIP13 PE=1 SV=2	Q15645	TRIP13	49 kDa	1.9899	0	#DIV/0!
Protein SGT1 homolog OS=Homo sapiens OX=9606 GN=SUGT1 PE=1 SV=3	Q9Y2Z0 (+1)	SUGT1	41 kDa	1.9899	0	#DIV/0!
DNA mismatch repair protein Msh3 OS=Homo sapiens OX=9606 GN=MSH3 PE=1 SV=1	A0A590UJW0 (+2)	MSH3	122 kDa	1.9899	0	#DIV/0!
Arylsulfatase L OS=Homo sapiens OX=9606 GN=ARSL PE=1 SV=1	A0A5F9ZHX8 (+4)	ARSL	60 kDa	1.9899	0	#DIV/0!
DNA-directed RNA polymerase II subunit E OS=Homo sapiens OX=9606 GN=POLR2E PE=1 SV=1	A0A087WVZ9 (+2)	POLR2E	21 kDa	1.9899	0	#DIV/0!
Clathrin interactor 1 OS=Homo sapiens OX=9606 GN=CLINT1 PE=1 SV=1	Q14677 (+1)	CLINT1	68 kDa	1.9899	0	#DIV/0!
Zinc finger protein 518A OS=Homo sapiens OX=9606 GN=ZNF518A PE=1 SV=2	Q6AHZ1	ZNF518A	167 kDa	1.3266	0	#DIV/0!
Reticulocalbin-2 OS=Homo sapiens OX=9606 GN=RCN2 PE=1 SV=1	Q14257 (+1)	RCN2	37 kDa	1.9899	0	#DIV/0!
Diphosphoinositol polyphosphate phosphohydrolase 2 OS=Homo sapiens OX=9606 GN=NUDT4 PE=1 SV=2	Q9NZJ9	NUDT4	20 kDa	1.9899	0	#DIV/0!
Lysosome membrane protein 2 OS=Homo sapiens OX=9606 GN=SCARB2 PE=1 SV=1	A0A1W2PPU6 (+4)	SCARB2	50 kDa	1.9899	0	#DIV/0!
FAS-associated factor 2 OS=Homo sapiens OX=9606 GN=FAF2 PE=1 SV=2	Q96CS3	FAF2	53 kDa	1.9899	0	#DIV/0!
Disintegrin and metalloproteinase domain-containing protein 10 OS=Homo sapiens OX=9606 GN=ADAM10 PE=1 SV=1	O14672	ADAM10	84 kDa	1.9899	0	#DIV/0!
GlcNAc kinase OS=Homo sapiens OX=9606 GN=NAGK PE=1 SV=3	C9JEV6 (+3)	NAGK	32 kDa	1.9899	0	#DIV/0!
Arrestin domain-containing protein 1 (Fragment) OS=Homo sapiens OX=9606 GN=ARRDC1 PE=1 SV=1	Q5T370 (+1)	ARRDC1	29 kDa	1.9899	0	#DIV/0!
CDK5 regulatory subunit-associated protein 3 OS=Homo sapiens OX=9606 GN=CDK5RAP3 PE=1 SV=2	Q96JB5 (+2)	CDK5RAP3	57 kDa	1.3266	0	#DIV/0!
Armadillo repeat-containing protein 8 OS=Homo sapiens OX=9606 GN=ARMC8 PE=1 SV=1	G5E9V6 (+2)	ARMC8	45 kDa	1.9899	0	#DIV/0!
Chitobiosyldiphosphodolichol beta-mannosyltransferase OS=Homo sapiens OX=9606 GN=ALG1 PE=1 SV=2	Q9BT22	ALG1	53 kDa	1.9899	0	#DIV/0!
Macoilin OS=Homo sapiens OX=9606 GN=MACO1 PE=1 SV=1	Q8N5G2	MACO1	76 kDa	1.9899	0	#DIV/0!
ATP-binding cassette sub-family B member 6, mitochondrial OS=Homo sapiens OX=9606 GN=ABCB6 PE=1 SV=1	Q9NP58 (+1)	ABCB6	94 kDa	2.6532	0	#DIV/0!
Aminopeptidase OS=Homo sapiens OX=9606 GN=NPEPPS PE=1 SV=1	E9PLK3 (+2)	NPEPPS	103 kDa	2.6532	0	#DIV/0!
40S ribosomal protein S3a OS=Entamoeba histolytica HM-1:IMSS OX=294381 GN=EHI_050280 PE=3 SV=1	C4LTQ5 (+1)	EHI_050280	29 kDa	2.6532	0	#DIV/0!
Translocation protein SEC62 OS=Homo sapiens OX=9606 GN=SEC62 PE=1 SV=1	F8WCJ7 (+2)	SEC62	12 kDa	2.6532	0	#DIV/0!
Putative inactive carboxylesterase 4 OS=Homo sapiens OX=9606 GN=CES1P1 PE=5 SV=2	Q9UKY3	CES1P1	31 kDa	1.9899	0	#DIV/0!
Acidic leucine-rich nuclear phosphoprotein 32 family member A OS=Homo sapiens OX=9606 GN=ANP32A PE=1 SV=1	H0YN26 (+1)	ANP32A	20 kDa	1.3266	0	#DIV/0!
Density-regulated protein OS=Homo sapiens OX=9606 GN=DENR PE=1 SV=1	F8VVL1 (+1)	DENR	18 kDa	1.3266	0	#DIV/0!
Ribonucloprotein OS=Homo sapiens OX=9606 GN=SNU13 PE=1 SV=1	B1AHD1	SNU13	15 kDa	1.3266	0	#DIV/0!
Protein FAM32A OS=Homo sapiens OX=9606 GN=FAM32A PE=1 SV=1	K7EIY1 (+1)	FAM32A	11 kDa	1.3266	0	#DIV/0!
Cell adhesion molecule 1 OS=Homo sapiens OX=9606 GN=CADM1 PE=1 SV=1	A0A087X1W8 (+6)	CADM1	46 kDa	1.3266	0	#DIV/0!
Arf-GAP with Rho-GAP domain, ANK repeat and PH domain-containing protein 1 OS=Homo sapiens OX=9606 GN=ARAP1 PE=1 SV=3	Q96P48 (+1)	ARAP1	162 kDa	1.3266	0	#DIV/0!
Tumor susceptibility gene 101 protein OS=Homo sapiens OX=9606 GN=TSG101 PE=1 SV=1	F5H442 (+1)	TSG101	41 kDa	1.3266	0	#DIV/0!
Vesicle-fusing ATPase (Fragment) OS=Homo sapiens OX=9606 PE=1 SV=3	I3L4J1		48 kDa	1.3266	0	#DIV/0!
Choline-phosphate cytidylyltransferase A (Fragment) OS=Homo sapiens OX=9606 GN=PCYT1A PE=1 SV=1	C9J050 (+4)	PCYT1A	34 kDa	1.3266	0	#DIV/0!
Claudin-4 OS=Homo sapiens OX=9606 GN=CLDN4 PE=1 SV=1	O14493	CLDN4	22 kDa	1.3266	0	#DIV/0!
Pseudouridylate synthase 7 homolog OS=Homo sapiens OX=9606 GN=PUS7 PE=1 SV=1	E7EUH7 (+2)	PUS7	51 kDa	1.3266	0	#DIV/0!
EEF1E1-BLOC1S5 readthrough (NMD candidate) OS=Homo sapiens OX=9606 GN=EEF1E1-BLOC1S5 PE=4 SV=2	C9J1V9 (+4)	EEF1E1-BLOC1S5	17 kDa	1.3266	0	#DIV/0!
Cell division cycle protein 16 homolog OS=Homo sapiens OX=9606 GN=CDC16 PE=1 SV=2	Q13042 (+4)	CDC16	72 kDa	1.3266	0	#DIV/0!
Neural Wiskott-Aldrich syndrome protein OS=Homo sapiens OX=9606 GN=WASL PE=1 SV=2	O00401	WASL	55 kDa	1.3266	0	#DIV/0!
60S ribosomal protein L3, putative OS=Entamoeba histolytica HM-1:IMSS OX=294381 GN=EHI_167520 PE=3 SV=1	B1N4Y7 (+1)	EHI_167520	40 kDa	1.3266	0	#DIV/0!
LIM domain only protein 7 OS=Homo sapiens OX=9606 GN=LMO7 PE=1 SV=1	E9PMS6	LMO7	145 kDa	1.3266	0	#DIV/0!
Cell cycle control protein OS=Homo sapiens OX=9606 GN=TMEM30A PE=1 SV=1	A0A669KBE6 (+3)	TMEM30A	36 kDa	1.3266	0	#DIV/0!
DNA dC->dU-editing enzyme APOBEC-3F OS=Homo sapiens OX=9606 GN=APOBEC3F PE=1 SV=3	Q8IUX4	APOBEC3F	45 kDa	1.3266	0	#DIV/0!
CWF19-like protein 2 (Fragment) OS=Homo sapiens OX=9606 GN=CWF19L2 PE=1 SV=1	H0YE03 (+4)	CWF19L2	64 kDa	1.3266	0	#DIV/0!
Flavin reductase (NADPH) OS=Homo sapiens OX=9606 GN=BLVRB PE=1 SV=1	A0A2R8YEP4 (+1)	BLVRB	26 kDa	1.3266	0	#DIV/0!
Replication protein A 14 kDa subunit OS=Homo sapiens OX=9606 GN=RPA3 PE=1 SV=1	B5MC59 (+1)	RPA3	9 kDa	1.3266	0	#DIV/0!
RAD51-associated protein 1 OS=Homo sapiens OX=9606 GN=RAD51AP1 PE=1 SV=1	Q96B01 (+1)	RAD51AP1	38 kDa	1.3266	0	#DIV/0!
39S ribosomal protein L3, mitochondrial (Fragment) OS=Homo sapiens OX=9606 GN=MRPL3 PE=1 SV=1	H0Y9G6	MRPL3	41 kDa	1.3266	0	#DIV/0!
Isoform 2 of Phosphatidylinositol 4-phosphate 3-kinase C2 domain-containing subunit alpha OS=Homo sapiens OX=9606 GN=PIK3C2A	O00443-2	PIK3C2A	54 kDa	1.3266	0	#DIV/0!
60S ribosomal protein L7a OS=Entamoeba histolytica HM-1:IMSS OX=294381 GN=EHI_029530 PE=3 SV=1	B1N3R9 (+1)	EHI_029530	32 kDa	1.3266	0	#DIV/0!
Helicase with zinc finger domain 2 OS=Homo sapiens OX=9606 GN=HELZ2 PE=1 SV=6	Q9BYK8	HELZ2	295 kDa	1.3266	0	#DIV/0!
Protein tyrosine phosphatase type IVA 1 OS=Homo sapiens OX=9606 GN=PTP4A1 PE=1 SV=1	A0A0D9SGK2 (+1)	PTP4A1	17 kDa	1.3266	0	#DIV/0!
GATOR complex protein WDR59 OS=Homo sapiens OX=9606 GN=WDR59 PE=1 SV=2	Q6PJI9	WDR59	110 kDa	1.3266	0	#DIV/0!
Kinetochore protein NDC80 homolog OS=Homo sapiens OX=9606 GN=NDC80 PE=1 SV=1	O14777	NDC80	74 kDa	1.3266	0	#DIV/0!
2-methoxy-6-polyprenyl-1,4-benzoquinol methylase, mitochondrial OS=Homo sapiens OX=9606 GN=COQ5 PE=1 SV=2	Q5HYK3	COQ5	37 kDa	1.3266	0	#DIV/0!
Ribosome biogenesis regulatory protein homolog OS=Homo sapiens OX=9606 GN=RRS1 PE=1 SV=2	Q15050	RRS1	41 kDa	1.3266	0	#DIV/0!
Adenylosuccinate lyase (Fragment) OS=Homo sapiens OX=9606 GN=ADSL PE=1 SV=1	A0A096LNY6 (+4)	ADSL	41 kDa	1.3266	0	#DIV/0!
Cilia- and flagella-associated protein 20 OS=Homo sapiens OX=9606 GN=CFAP20 PE=1 SV=1	Q9Y6A4	CFAP20	23 kDa	1.3266	0	#DIV/0!
Guanine nucleotide exchange factor OS=Entamoeba histolytica HM-1:IMSS OX=294381 GN=EHI_049610 PE=4 SV=1	C4LUG2 (+2)	EHI_049610	73 kDa	1.3266	0	#DIV/0!
Nuclear protein localization protein 4 homolog OS=Homo sapiens OX=9606 GN=NPLOC4 PE=1 SV=3	Q8TAT6 (+1)	NPLOC4	68 kDa	1.3266	0	#DIV/0!
Ribonuclease P protein subunit p38 OS=Homo sapiens OX=9606 GN=RPP38 PE=1 SV=2	P78345 (+1)	RPP38	32 kDa	1.3266	0	#DIV/0!
U3 small nucleolar ribonucleoprotein protein IMP3 OS=Homo sapiens OX=9606 GN=IMP3 PE=1 SV=1	Q9NV31	IMP3	22 kDa	1.3266	0	#DIV/0!
Peroxisomal acyl-coenzyme A oxidase 1 OS=Homo sapiens OX=9606 GN=ACOX1 PE=1 SV=3	Q15067 (+2)	ACOX1	74 kDa	1.3266	0	#DIV/0!
Proline dehydrogenase OS=Homo sapiens OX=9606 GN=PRODH PE=1 SV=1	A0A087WWM6 (+1)	PRODH	68 kDa	1.3266	0	#DIV/0!
Reticulocalbin-1 OS=Homo sapiens OX=9606 GN=RCN1 PE=1 SV=1	Q15293 (+1)	RCN1	39 kDa	1.3266	0	#DIV/0!
Zinc finger protein ZPR1 (Fragment) OS=Homo sapiens OX=9606 GN=ZPR1 PE=1 SV=1	H7BZM7 (+1)	ZPR1	48 kDa	1.3266	0	#DIV/0!
3-keto-steroid reductase/17-beta-hydroxysteroid dehydrogenase 7 OS=Homo sapiens OX=9606 GN=HSD17B7 PE=1 SV=1	P56937 (+2)	HSD17B7	38 kDa	1.3266	0	#DIV/0!
LEM domain-containing protein 2 (Fragment) OS=Homo sapiens OX=9606 GN=LEMD2 PE=1 SV=1	H7C2Z0 (+1)	LEMD2	31 kDa	1.3266	0	#DIV/0!
Pro-cathepsin H OS=Homo sapiens OX=9606 GN=CTSH PE=1 SV=2	A0A087X0D5 (+8)	CTSH	40 kDa	1.3266	0	#DIV/0!
Abnormal spindle-like microcephaly-associated protein OS=Homo sapiens OX=9606 GN=ASPM PE=1 SV=2	Q8IZT6	ASPM	410 kDa	1.3266	0	#DIV/0!
Parvalbumin alpha (Fragment) OS=Homo sapiens OX=9606 GN=PVALB PE=1 SV=1	H0Y3U0	PVALB	12 kDa	1.3266	0	#DIV/0!
Nuclear factor related to kappa-B-binding protein OS=Homo sapiens OX=9606 GN=NFRKB PE=1 SV=2	Q6P4R8 (+2)	NFRKB	139 kDa	1.3266	0	#DIV/0!
Vacuolar protein sorting-associated protein 26B OS=Homo sapiens OX=9606 GN=VPS26B PE=1 SV=2	Q4G0F5	VPS26B	39 kDa	1.3266	0	#DIV/0!
Non-specific serine/threonine protein kinase OS=Entamoeba histolytica HM-1:IMSS OX=294381 GN=EHI_019070 PE=4 SV=1	C4M8A0 (+2)	EHI_019070	139 kDa	1.3266	0	#DIV/0!
Protein Hook homolog 1 OS=Homo sapiens OX=9606 GN=HOOK1 PE=1 SV=2	Q9UJC3 (+1)	HOOK1	85 kDa	1.3266	0	#DIV/0!
Telomere length regulation protein TEL2 homolog OS=Homo sapiens OX=9606 GN=TELO2 PE=1 SV=2	Q9Y4R8	TELO2	92 kDa	1.3266	0	#DIV/0!
Aldo-keto reductase family 1 member C3 OS=Homo sapiens OX=9606 GN=AKR1C3 PE=1 SV=1	A0A0A0MSS8 (+3)	AKR1C3	37 kDa	1.3266	0	#DIV/0!
Calmodulin-2 OS=Homo sapiens OX=9606 GN=CALM2 PE=1 SV=1	E7EMB3 (+3)	CALM2	22 kDa	1.3266	0	#DIV/0!
Serine/threonine-protein kinase TAO1 OS=Homo sapiens OX=9606 GN=TAOK1 PE=1 SV=1	Q7L7X3	TAOK1	116 kDa	1.3266	0	#DIV/0!
Protein arginine N-methyltransferase 3 OS=Homo sapiens OX=9606 GN=PRMT3 PE=1 SV=4	O60678	PRMT3	60 kDa	1.3266	0	#DIV/0!
39S ribosomal protein L22, mitochondrial OS=Homo sapiens OX=9606 GN=MRPL22 PE=1 SV=1	E7ESL0 (+4)	MRPL22	24 kDa	1.3266	0	#DIV/0!
Isoform 3 of Membrane cofactor protein OS=Homo sapiens OX=9606 GN=CD46	P15529-16 (+6)	CD46	37 kDa	1.3266	0	#DIV/0!
Adenosine kinase OS=Homo sapiens OX=9606 GN=ADK PE=1 SV=2	P55263 (+2)	ADK	41 kDa	1.3266	0	#DIV/0!
Ras-related protein Rab-9A OS=Homo sapiens OX=9606 GN=RAB9A PE=1 SV=1	P51151	RAB9A	23 kDa	1.3266	0	#DIV/0!
Sorbitol dehydrogenase OS=Homo sapiens OX=9606 GN=SORD PE=1 SV=1	A0A6I8PIS1 (+3)	SORD	27 kDa	1.3266	0	#DIV/0!
Mitochondrial genome maintenance exonuclease 1 OS=Homo sapiens OX=9606 GN=MGME1 PE=1 SV=1	Q5QPE7 (+1)	MGME1	29 kDa	1.3266	0	#DIV/0!
Tripartite motif-containing protein 26 (Fragment) OS=Homo sapiens OX=9606 GN=TRIM26 PE=1 SV=1	A0A0G2JIW2 (+2)	TRIM26	18 kDa	1.3266	0	#DIV/0!
Beta-2-glycoprotein 1 OS=Homo sapiens OX=9606 GN=APOH PE=1 SV=3	P02749	APOH	38 kDa	1.9899	0	#DIV/0!
CDGSH iron-sulfur domain-containing protein 2 OS=Homo sapiens OX=9606 GN=CISD2 PE=1 SV=1	Q8N5K1	CISD2	15 kDa	1.3266	0	#DIV/0!
Cap-specific mRNA (nucleoside-2'-O-)-methyltransferase 1 OS=Homo sapiens OX=9606 GN=CMTR1 PE=1 SV=1	Q8N1G2	CMTR1	95 kDa	1.3266	0	#DIV/0!
RNA helicase OS=Homo sapiens OX=9606 GN=DHX8 PE=1 SV=1	F5H658 (+1)	DHX8	134 kDa	1.3266	0	#DIV/0!
Putative phospholipase B-like 2 OS=Homo sapiens OX=9606 GN=PLBD2 PE=1 SV=2	Q8NHP8 (+1)	PLBD2	65 kDa	1.3266	0	#DIV/0!
Peroxisomal membrane protein 11B OS=Homo sapiens OX=9606 GN=PEX11B PE=1 SV=1	O96011 (+1)	PEX11B	28 kDa	1.3266	0	#DIV/0!
D-aminoacyl-tRNA deacylase 1 OS=Homo sapiens OX=9606 GN=DTD1 PE=1 SV=2	Q8TEA8	DTD1	23 kDa	1.3266	0	#DIV/0!
Protein FAM151A OS=Homo sapiens OX=9606 GN=FAM151A PE=2 SV=2	Q8WW52	FAM151A	64 kDa	1.3266	0	#DIV/0!
Mitochondrial-processing peptidase subunit alpha OS=Homo sapiens OX=9606 GN=PMPCA PE=1 SV=2	Q10713	PMPCA	58 kDa	1.3266	0	#DIV/0!
Serine/threonine-protein kinase Nek9 OS=Homo sapiens OX=9606 GN=NEK9 PE=4 SV=1	A0A7I2V454 (+2)	NEK9	94 kDa	1.3266	0	#DIV/0!
E3 ubiquitin-protein ligase HUWE1 OS=Homo sapiens OX=9606 GN=HUWE1 PE=1 SV=3	Q7Z6Z7 (+2)	HUWE1	482 kDa	1.3266	0	#DIV/0!
Exportin-7 OS=Homo sapiens OX=9606 GN=XPO7 PE=1 SV=1	E7ESC6 (+1)	XPO7	124 kDa	1.3266	0	#DIV/0!
Tetraspanin OS=Homo sapiens OX=9606 GN=CD81 PE=1 SV=1	A6NMH8 (+6)	CD81	30 kDa	1.3266	0	#DIV/0!
Dol-P-Man:Man(5)GlcNAc(2)-PP-Dol alpha-1,3-mannosyltransferase (Fragment) OS=Homo sapiens OX=9606 GN=ALG3 PE=1 SV=1	H7C0X4 (+1)	ALG3	37 kDa	1.3266	0	#DIV/0!
Chromosome 6 open reading frame 55, isoform CRA_b OS=Homo sapiens OX=9606 GN=VTA1 PE=1 SV=1	A0A087WY55 (+1)	VTA1	31 kDa	1.3266	0	#DIV/0!
Phosphogluconate dehydrogenase (NADP(+)-dependent, decarboxylating) (Fragment) OS=Homo sapiens OX=9606 GN=PGD PE=1 SV=1	K7EM49 (+4)	PGD	22 kDa	1.3266	0	#DIV/0!
Ribonucleases P/MRP protein subunit POP1 OS=Homo sapiens OX=9606 GN=POP1 PE=1 SV=2	Q99575	POP1	115 kDa	1.3266	0	#DIV/0!
Syntaxin-3 (Fragment) OS=Homo sapiens OX=9606 GN=STX3 PE=1 SV=1	A0A0C4DGE4 (+5)	STX3	23 kDa	1.3266	0	#DIV/0!
Low-density lipoprotein receptor-related protein 2 OS=Homo sapiens OX=9606 GN=LRP2 PE=1 SV=3	P98164	LRP2	522 kDa	1.9899	0	#DIV/0!
3-hydroxy-3-methylglutaryl-coenzyme A reductase OS=Homo sapiens OX=9606 GN=HMGCR PE=1 SV=1	P04035 (+2)	HMGCR	97 kDa	1.9899	0	#DIV/0!
Nuclear factor of activated T-cells, cytoplasmic 2 OS=Homo sapiens OX=9606 GN=NFATC2 PE=1 SV=2	Q13469 (+3)	NFATC2	100 kDa	1.3266	0	#DIV/0!
Testis-specific Y-encoded-like protein 1 OS=Homo sapiens OX=9606 GN=TSPYL1 PE=1 SV=3	Q9H0U9	TSPYL1	49 kDa	1.3266	0	#DIV/0!
7SK snRNA methylphosphate capping enzyme OS=Homo sapiens OX=9606 GN=MEPCE PE=1 SV=1	Q7L2J0	MEPCE	74 kDa	1.3266	0	#DIV/0!
Phosphatidylethanolamine-binding protein 1 OS=Homo sapiens OX=9606 GN=PEBP1 PE=1 SV=3	P30086	PEBP1	21 kDa	1.3266	0	#DIV/0!
40S ribosomal protein S25 OS=Entamoeba histolytica HM-1:IMSS OX=294381 GN=EHI_074800 PE=3 SV=1	C4M9F4	EHI_074800	15 kDa	1.3266	0	#DIV/0!
COP9 signalosome complex subunit 5 OS=Homo sapiens OX=9606 GN=COPS5 PE=1 SV=4	Q92905	COPS5	38 kDa	1.3266	0	#DIV/0!
Succinate dehydrogenase [ubiquinone] iron-sulfur subunit, mitochondrial OS=Homo sapiens OX=9606 GN=SDHB PE=1 SV=3	P21912	SDHB	32 kDa	1.3266	0	#DIV/0!
Alpha-mannosidase 2 OS=Homo sapiens OX=9606 GN=MAN2A1 PE=1 SV=2	Q16706	MAN2A1	131 kDa	1.3266	0	#DIV/0!
Protein YIPF5 OS=Homo sapiens OX=9606 GN=YIPF5 PE=1 SV=1	Q969M3 (+1)	YIPF5	28 kDa	1.3266	0	#DIV/0!
Translocating chain-associated membrane protein 2 OS=Homo sapiens OX=9606 GN=TRAM2 PE=1 SV=1	Q15035	TRAM2	43 kDa	1.3266	0	#DIV/0!
Solute carrier family 12 member 6 OS=Homo sapiens OX=9606 GN=SLC12A6 PE=1 SV=1	A0A6Q8PH21 (+3)	SLC12A6	127 kDa	1.3266	0	#DIV/0!
AP complex subunit sigma OS=Homo sapiens OX=9606 GN=AP1S3 PE=1 SV=1	B8ZZZ1 (+4)	AP1S3	16 kDa	1.3266	0	#DIV/0!
Choline dehydrogenase, mitochondrial OS=Homo sapiens OX=9606 GN=CHDH PE=1 SV=2	Q8NE62	CHDH	65 kDa	1.3266	0	#DIV/0!
Protein SMG8 OS=Homo sapiens OX=9606 GN=SMG8 PE=1 SV=1	Q8ND04 (+1)	SMG8	110 kDa	1.9899	0	#DIV/0!
Grainin 2 OS=Entamoeba histolytica HM-1:IMSS OX=294381 GN=EHI_167310 PE=4 SV=1	A0A8U0WPU5 (+2)	EHI_167310	24 kDa	0	0	#DIV/0!
Protein BUD31 homolog OS=Homo sapiens OX=9606 GN=BUD31 PE=1 SV=2	P41223 (+1)	BUD31	17 kDa	1.3266	0	#DIV/0!
28S ribosomal protein S15, mitochondrial OS=Homo sapiens OX=9606 GN=MRPS15 PE=1 SV=1	P82914	MRPS15	30 kDa	1.3266	0	#DIV/0!
Ribosomal protein L15 OS=Entamoeba histolytica HM-1:IMSS OX=294381 GN=EHI_020300 PE=3 SV=1	C4M7U2 (+2)	EHI_020300	24 kDa	1.3266	0	#DIV/0!
Poly(A) polymerase OS=Homo sapiens OX=9606 GN=PAPOLA PE=1 SV=1	G3XAH6 (+1)	PAPOLA	81 kDa	1.3266	0	#DIV/0!
Peroxisomal acyl-coenzyme A oxidase 2 (Fragment) OS=Homo sapiens OX=9606 GN=ACOX2 PE=4 SV=1	H7C573	ACOX2	1 kDa	1.3266	0	#DIV/0!
Alpha-1,3/1,6-mannosyltransferase ALG2 OS=Homo sapiens OX=9606 GN=ALG2 PE=1 SV=1	Q9H553 (+1)	ALG2	47 kDa	1.3266	0	#DIV/0!
G-protein-coupled receptor family C group 5 member C OS=Homo sapiens OX=9606 GN=GPRC5C PE=1 SV=1	A0A0C4DFY5 (+3)	GPRC5C	53 kDa	1.9899	0	#DIV/0!
LIM and SH3 domain protein 1 (Fragment) OS=Homo sapiens OX=9606 GN=LASP1 PE=1 SV=1	C9J9W2 (+3)	LASP1	19 kDa	1.3266	0	#DIV/0!
Laminin subunit beta-3 OS=Homo sapiens OX=9606 GN=LAMB3 PE=1 SV=1	Q13751	LAMB3	130 kDa	1.9899	0	#DIV/0!
THUMP domain-containing protein 3 OS=Homo sapiens OX=9606 GN=THUMPD3 PE=1 SV=1	Q9BV44	THUMPD3	57 kDa	1.9899	0	#DIV/0!
39S ribosomal protein L20, mitochondrial OS=Homo sapiens OX=9606 GN=MRPL20 PE=1 SV=1	Q9BYC9	MRPL20	17 kDa	1.3266	0	#DIV/0!
Proteasome activator complex subunit 4 OS=Homo sapiens OX=9606 GN=PSME4 PE=1 SV=2	Q14997	PSME4	211 kDa	1.3266	0	#DIV/0!
Cytospin-A OS=Homo sapiens OX=9606 GN=SPECC1L PE=1 SV=1	A0A494C1J1 (+2)	SPECC1L	126 kDa	1.9899	0	#DIV/0!
Cornulin OS=Homo sapiens OX=9606 GN=CRNN PE=1 SV=1	Q9UBG3	CRNN	54 kDa	1.9899	0	#DIV/0!
Rho guanine nucleotide exchange factor 18 OS=Homo sapiens OX=9606 GN=ARHGEF18 PE=1 SV=4	Q6ZSZ5 (+2)	ARHGEF18	152 kDa	1.9899	0	#DIV/0!
Heme oxygenase (biliverdin-producing) OS=Homo sapiens OX=9606 GN=HMOX2 PE=1 SV=1	A0A087WT44 (+1)	HMOX2	42 kDa	1.9899	0	#DIV/0!
ADP-ribosylation factor-like protein 2 OS=Homo sapiens OX=9606 GN=ARL2 PE=1 SV=4	P36404	ARL2	21 kDa	1.9899	0	#DIV/0!
[Protein ADP-ribosylarginine] hydrolase-like protein 1 OS=Homo sapiens OX=9606 GN=ADPRHL1 PE=1 SV=1	A0A0U1RQK4	ADPRHL1	212 kDa	1.3266	0	#DIV/0!
Glutamine-dependent NAD(+) synthetase OS=Homo sapiens OX=9606 GN=NADSYN1 PE=1 SV=3	Q6IA69	NADSYN1	79 kDa	1.9899	0	#DIV/0!
60S ribosomal export protein NMD3 OS=Homo sapiens OX=9606 GN=NMD3 PE=1 SV=1	C9JA08 (+1)	NMD3	60 kDa	1.9899	0	#DIV/0!
LIM and calponin homology domains-containing protein 1 OS=Homo sapiens OX=9606 GN=LIMCH1 PE=1 SV=1	G5EA03	LIMCH1	164 kDa	1.3266	0	#DIV/0!
Beta-hexosaminidase OS=Homo sapiens OX=9606 GN=HEXA PE=1 SV=1	H3BP20 (+4)	HEXA	62 kDa	1.3266	0	#DIV/0!
Palmitoyl-protein hydrolase 1 OS=Homo sapiens OX=9606 GN=PPT1 PE=1 SV=1	A0A286YFF7 (+2)	PPT1	37 kDa	1.9899	0	#DIV/0!
Lysophospholipid acyltransferase 7 OS=Homo sapiens OX=9606 GN=MBOAT7 PE=1 SV=2	Q96N66	MBOAT7	53 kDa	1.9899	0	#DIV/0!
Hydroxymethylglutaryl-CoA synthase, cytoplasmic OS=Homo sapiens OX=9606 GN=HMGCS1 PE=1 SV=2	Q01581	HMGCS1	57 kDa	1.9899	0	#DIV/0!
60S ribosomal protein L9, putative OS=Entamoeba histolytica HM-1:IMSS OX=294381 GN=EHI_126140 PE=3 SV=1	C4LVZ9 (+1)	EHI_126140	22 kDa	1.9899	0	#DIV/0!
Actin-related protein 2/3 complex subunit 5 OS=Homo sapiens OX=9606 GN=ARPC5 PE=1 SV=3	O15511	ARPC5	16 kDa	1.9899	0	#DIV/0!
Farnesyl pyrophosphate synthase OS=Homo sapiens OX=9606 GN=FDPS PE=1 SV=4	P14324 (+1)	FDPS	48 kDa	1.9899	0	#DIV/0!
Importin-9 OS=Homo sapiens OX=9606 GN=IPO9 PE=1 SV=3	Q96P70	IPO9	116 kDa	1.9899	0	#DIV/0!
Exosome complex component MTR3 OS=Homo sapiens OX=9606 GN=EXOSC6 PE=1 SV=1	Q5RKV6	EXOSC6	28 kDa	1.3266	0	#DIV/0!
Protein-glutamine gamma-glutamyltransferase K OS=Homo sapiens OX=9606 GN=TGM1 PE=1 SV=4	P22735	TGM1	90 kDa	0	0	#DIV/0!
Acetyl-CoA acetyltransferase, cytosolic OS=Homo sapiens OX=9606 GN=ACAT2 PE=1 SV=2	Q9BWD1 (+1)	ACAT2	41 kDa	1.9899	0	#DIV/0!
Succinate--CoA ligase [ADP-forming] subunit beta, mitochondrial OS=Homo sapiens OX=9606 GN=SUCLA2 PE=1 SV=1	A0A2R8Y6Y7 (+3)	SUCLA2	53 kDa	1.9899	0	#DIV/0!
Signal peptidase complex subunit 3 OS=Homo sapiens OX=9606 GN=SPCS3 PE=1 SV=1	P61009	SPCS3	20 kDa	1.9899	0	#DIV/0!
HEAT repeat-containing protein 1 OS=Homo sapiens OX=9606 GN=HEATR1 PE=1 SV=1	Q5T3Q7 (+1)	HEATR1	233 kDa	1.9899	0	#DIV/0!
Serpin B12 OS=Homo sapiens OX=9606 GN=SERPINB12 PE=1 SV=1	Q96P63 (+1)	SERPINB12	46 kDa	0	0	#DIV/0!
Presenilin-1 OS=Homo sapiens OX=9606 GN=PSEN1 PE=1 SV=1	P49768 (+1)	PSEN1	53 kDa	1.9899	0	#DIV/0!
Kinesin-like protein KIF18A OS=Homo sapiens OX=9606 GN=KIF18A PE=1 SV=2	Q8NI77	KIF18A	102 kDa	1.3266	0	#DIV/0!
Endothelin-converting enzyme 2 (Fragment) OS=Homo sapiens OX=9606 GN=ECE2 PE=4 SV=1	H0Y5G8 (+4)	ECE2	81 kDa	1.9899	0	#DIV/0!
BUB3-interacting and GLEBS motif-containing protein ZNF207 OS=Homo sapiens OX=9606 GN=ZNF207 PE=1 SV=1	J3QRS9 (+4)	ZNF207	53 kDa	1.3266	0	#DIV/0!
40S ribosomal protein S14, putative OS=Entamoeba histolytica HM-1:IMSS OX=294381 GN=EHI_012360 PE=3 SV=1	B1N2I3 (+2)	EHI_012360	16 kDa	1.9899	0	#DIV/0!
Probable G-protein-coupled receptor 179 OS=Homo sapiens OX=9606 GN=GPR179 PE=1 SV=1	A0A087WW83 (+2)	GPR179	257 kDa	1.9899	0	#DIV/0!
Steryl-sulfatase OS=Homo sapiens OX=9606 GN=STS PE=1 SV=2	A0A590UJL0 (+2)	STS	65 kDa	1.9899	0	#DIV/0!
WD repeat-containing protein 11 OS=Homo sapiens OX=9606 GN=WDR11 PE=1 SV=1	Q9BZH6	WDR11	137 kDa	1.3266	0	#DIV/0!
Calcium-binding and coiled-coil domain-containing protein 2 (Fragment) OS=Homo sapiens OX=9606 GN=CALCOCO2 PE=1 SV=1	D6REB0 (+4)	CALCOCO2	31 kDa	1.3266	0	#DIV/0!
Carnitine O-palmitoyltransferase 1, liver isoform OS=Homo sapiens OX=9606 GN=CPT1A PE=1 SV=2	P50416 (+1)	CPT1A	88 kDa	1.3266	0	#DIV/0!
Hexokinase-1 OS=Homo sapiens OX=9606 GN=HK1 PE=1 SV=3	P19367 (+3)	HK1	102 kDa	1.3266	0	#DIV/0!
Drebrin OS=Homo sapiens OX=9606 GN=DBN1 PE=1 SV=4	Q16643 (+2)	DBN1	71 kDa	1.3266	0	#DIV/0!
Oxygen-dependent coproporphyrinogen-III oxidase, mitochondrial OS=Homo sapiens OX=9606 GN=CPOX PE=1 SV=3	P36551	CPOX	50 kDa	1.3266	0	#DIV/0!
StAR-related lipid transfer protein 9 OS=Homo sapiens OX=9606 GN=STARD9 PE=1 SV=3	Q9P2P6	STARD9	516 kDa	1.3266	0	#DIV/0!
DNA-directed RNA polymerase subunit beta OS=Homo sapiens OX=9606 GN=POLR2B PE=1 SV=2	C9J2Y9 (+2)	POLR2B	133 kDa	1.3266	0	#DIV/0!
Paraspeckle component 1 OS=Homo sapiens OX=9606 GN=PSPC1 PE=1 SV=1	Q8WXF1 (+1)	PSPC1	59 kDa	1.3266	0	#DIV/0!
Sodium channel and clathrin linker 1 OS=Homo sapiens OX=9606 GN=SCLT1 PE=1 SV=2	Q96NL6	SCLT1	81 kDa	1.3266	0	#DIV/0!
Putative cytochrome b-c1 complex subunit Rieske-like protein 1 OS=Homo sapiens OX=9606 GN=UQCRFS1P1 PE=5 SV=1	P0C7P4 (+1)	UQCRFS1P1	31 kDa	1.3266	0	#DIV/0!
Tropomodulin-3 (Fragment) OS=Homo sapiens OX=9606 GN=TMOD3 PE=1 SV=1	H0YKU1 (+2)	TMOD3	21 kDa	1.3266	0	#DIV/0!
Lysosome-associated membrane glycoprotein 2 OS=Homo sapiens OX=9606 GN=LAMP2 PE=1 SV=2	P13473 (+2)	LAMP2	45 kDa	1.3266	0	#DIV/0!
A-kinase anchor protein 6 OS=Homo sapiens OX=9606 GN=AKAP6 PE=1 SV=1	G3V3H7	AKAP6	140 kDa	1.3266	0	#DIV/0!
Isoform 2 of SWI/SNF-related matrix-associated actin-dependent regulator of chromatin subfamily D member 2 OS=Homo sapiens OX=9606 GN=SMARCD2	Q92925-2	SMARCD2	57 kDa	1.3266	0	#DIV/0!
Phosphatidylinositol 5-phosphate 4-kinase type-2 gamma OS=Homo sapiens OX=9606 GN=PIP4K2C PE=1 SV=3	Q8TBX8 (+1)	PIP4K2C	47 kDa	1.3266	0	#DIV/0!
Branched-chain-amino-acid aminotransferase OS=Homo sapiens OX=9606 GN=BCAT2 PE=1 SV=1	B3KSI3 (+5)	BCAT2	40 kDa	1.3266	0	#DIV/0!
Transducin beta-like protein 3 (Fragment) OS=Homo sapiens OX=9606 GN=TBL3 PE=1 SV=1	J3KNP2 (+1)	TBL3	77 kDa	1.3266	0	#DIV/0!
Transmembrane emp24 domain-containing protein 3 OS=Homo sapiens OX=9606 GN=TMED3 PE=1 SV=1	Q9Y3Q3	TMED3	25 kDa	1.3266	0	#DIV/0!
Laminin subunit alpha-2 OS=Homo sapiens OX=9606 GN=LAMA2 PE=1 SV=1	A0A087WX80 (+2)	LAMA2	344 kDa	1.3266	0	#DIV/0!
Serine/threonine-protein phosphatase (Fragment) OS=Homo sapiens OX=9606 GN=PPP5C PE=1 SV=1	H0YDU8 (+1)	PPP5C	55 kDa	1.3266	0	#DIV/0!
Protein pelota homolog OS=Homo sapiens OX=9606 GN=PELO PE=1 SV=2	Q9BRX2	PELO	43 kDa	1.3266	0	#DIV/0!
40S ribosomal protein S7 OS=Entamoeba histolytica HM-1:IMSS OX=294381 GN=EHI_140540 PE=3 SV=1	B1N3K9 (+5)	EHI_140540	22 kDa	1.3266	0	#DIV/0!
ADP-sugar pyrophosphatase OS=Homo sapiens OX=9606 GN=NUDT5 PE=1 SV=1	A6NCQ0 (+3)	NUDT5	20 kDa	1.3266	0	#DIV/0!
60S ribosomal protein L6, putative OS=Entamoeba histolytica HM-1:IMSS OX=294381 GN=EHI_045300 PE=3 SV=1	C4LTE3 (+2)	EHI_045300	23 kDa	1.3266	0	#DIV/0!
Lysocardiolipin acyltransferase 1 OS=Homo sapiens OX=9606 GN=LCLAT1 PE=1 SV=1	Q6UWP7 (+1)	LCLAT1	49 kDa	1.3266	0	#DIV/0!
Lysophosphatidylcholine acyltransferase 1 OS=Homo sapiens OX=9606 GN=LPCAT1 PE=1 SV=2	Q8NF37	LPCAT1	59 kDa	1.3266	0	#DIV/0!
60S ribosomal protein L23, putative OS=Entamoeba histolytica HM-1:IMSS OX=294381 GN=EHI_051710 PE=3 SV=1	C4LVB0 (+2)	EHI_051710	15 kDa	1.3266	0	#DIV/0!
GPI-anchor transamidase OS=Homo sapiens OX=9606 GN=PIGK PE=1 SV=2	Q92643	PIGK	45 kDa	1.3266	0	#DIV/0!
60S acidic ribosomal protein P0 OS=Entamoeba histolytica HM-1:IMSS OX=294381 GN=EHI_090400 PE=3 SV=1	B1N2Z3	EHI_090400	34 kDa	1.3266	0	#DIV/0!
18S rRNA aminocarboxypropyltransferase OS=Homo sapiens OX=9606 GN=TSR3 PE=1 SV=1	Q9UJK0	TSR3	34 kDa	1.3266	0	#DIV/0!
Myeloid-derived growth factor (Fragment) OS=Homo sapiens OX=9606 GN=MYDGF PE=1 SV=1	M0QXF7 (+2)	MYDGF	10 kDa	1.3266	0	#DIV/0!
Vacuolar protein sorting-associated protein 33A OS=Homo sapiens OX=9606 GN=VPS33A PE=1 SV=1	A0A2R8YF87 (+2)	VPS33A	72 kDa	1.3266	0	#DIV/0!
Ribonuclease P protein subunit p30 (Fragment) OS=Homo sapiens OX=9606 GN=RPP30 PE=1 SV=1	Q5VU11	RPP30	28 kDa	1.3266	0	#DIV/0!
Cytochrome P450 2S1 OS=Homo sapiens OX=9606 GN=CYP2S1 PE=1 SV=2	Q96SQ9 (+1)	CYP2S1	56 kDa	1.3266	0	#DIV/0!
40S ribosomal protein S18, putative OS=Entamoeba histolytica HM-1:IMSS OX=294381 GN=EHI_009680 PE=3 SV=1	C4LZ42	EHI_009680	18 kDa	1.3266	0	#DIV/0!
Casein kinase II subunit alpha' OS=Homo sapiens OX=9606 GN=CSNK2A2 PE=1 SV=2	H3BNI9 (+2)	CSNK2A2	35 kDa	1.3266	0	#DIV/0!
HCLS1-associated protein X-1 OS=Homo sapiens OX=9606 GN=HAX1 PE=1 SV=1	E9PIQ7 (+4)	HAX1	17 kDa	1.3266	0	#DIV/0!
60S ribosomal protein L24, putative OS=Entamoeba histolytica HM-1:IMSS OX=294381 GN=EHI_030760 PE=3 SV=1	C4LSA0	EHI_030760	19 kDa	1.3266	0	#DIV/0!
LRP chaperone MESD OS=Homo sapiens OX=9606 GN=MESD PE=1 SV=2	Q14696	MESD	26 kDa	1.3266	0	#DIV/0!
pre-mRNA 3' end processing protein WDR33 OS=Homo sapiens OX=9606 GN=WDR33 PE=1 SV=2	Q9C0J8	WDR33	146 kDa	1.3266	0	#DIV/0!
39S ribosomal protein L28, mitochondrial (Fragment) OS=Homo sapiens OX=9606 GN=MRPL28 PE=1 SV=1	A2IDC6 (+1)	MRPL28	29 kDa	1.3266	0	#DIV/0!
40S ribosomal protein S6 OS=Entamoeba histolytica HM-1:IMSS OX=294381 GN=EHI_199990 PE=3 SV=1	B1N442 (+2)	EHI_199990	30 kDa	1.3266	0	#DIV/0!
Actin-related protein 5 OS=Homo sapiens OX=9606 GN=ACTR5 PE=1 SV=2	Q9H9F9	ACTR5	68 kDa	1.3266	0	#DIV/0!
NACHT, LRR and PYD domains-containing protein 6 OS=Homo sapiens OX=9606 GN=NLRP6 PE=1 SV=2	P59044 (+1)	NLRP6	99 kDa	1.3266	0	#DIV/0!
Ubiquitin carboxyl-terminal hydrolase 5 OS=Homo sapiens OX=9606 GN=USP5 PE=1 SV=2	P45974 (+1)	USP5	96 kDa	1.3266	0	#DIV/0!
Isoform 7 of Sodium/calcium exchanger 1 OS=Homo sapiens OX=9606 GN=SLC8A1	P32418-3	SLC8A1	107 kDa	1.3266	0	#DIV/0!
Histone acetyltransferase KAT7 OS=Homo sapiens OX=9606 GN=KAT7 PE=1 SV=1	O95251 (+2)	KAT7	71 kDa	1.3266	0	#DIV/0!
Glycerol-3-phosphate acyltransferase 3 OS=Homo sapiens OX=9606 GN=GPAT3 PE=1 SV=2	Q53EU6	GPAT3	49 kDa	1.3266	0	#DIV/0!
40S ribosomal protein S8 OS=Entamoeba histolytica HM-1:IMSS OX=294381 GN=EHI_009870 PE=3 SV=1	C4M0Q2 (+2)	EHI_009870	27 kDa	1.3266	0	#DIV/0!
Mothers against decapentaplegic homolog 1 OS=Homo sapiens OX=9606 GN=SMAD1 PE=1 SV=1	Q15797	SMAD1	52 kDa	1.3266	0	#DIV/0!
Prostaglandin E synthase 3 OS=Homo sapiens OX=9606 GN=PTGES3 PE=1 SV=1	A0A087WYT3 (+3)	PTGES3	19 kDa	1.3266	0	#DIV/0!
Regulator of nonsense transcripts 3A OS=Homo sapiens OX=9606 GN=UPF3A PE=1 SV=1	Q9H1J1 (+1)	UPF3A	55 kDa	1.3266	0	#DIV/0!
Rho GDP-dissociation inhibitor 1 OS=Homo sapiens OX=9606 GN=ARHGDIA PE=1 SV=1	J3KRE2 (+3)	ARHGDIA	15 kDa	1.3266	0	#DIV/0!
Tryptophan--tRNA ligase, cytoplasmic OS=Homo sapiens OX=9606 GN=WARS1 PE=1 SV=2	P23381 (+1)	WARS1	53 kDa	1.3266	0	#DIV/0!
UDP-glucose:glycoprotein glucosyltransferase 1 OS=Homo sapiens OX=9606 GN=UGGT1 PE=1 SV=3	Q9NYU2 (+1)	UGGT1	177 kDa	6.6329	1.4604	4.54184
Adipocyte plasma membrane-associated protein OS=Homo sapiens OX=9606 GN=APMAP PE=1 SV=2	Q9HDC9	APMAP	46 kDa	5.9696	1.4604	4.08765
Cathepsin D OS=Homo sapiens OX=9606 GN=CTSD PE=1 SV=1	A0A1B0GV23 (+4)	CTSD	44 kDa	5.3063	1.4604	3.63346
E3 ubiquitin-protein ligase UBR4 OS=Homo sapiens OX=9606 GN=UBR4 PE=1 SV=1	Q5T4S7 (+3)	UBR4	574 kDa	5.3063	1.4604	3.63346
Phosphofurin acidic cluster sorting protein 1 OS=Homo sapiens OX=9606 GN=PACS1 PE=1 SV=2	Q6VY07 (+1)	PACS1	105 kDa	4.643	1.4604	3.17927
Cingulin OS=Homo sapiens OX=9606 GN=CGN PE=1 SV=2	Q9P2M7	CGN	136 kDa	6.6329	2.1906	3.02789
Exportin-1 OS=Homo sapiens OX=9606 GN=XPO1 PE=4 SV=1	A0A7I2V2S3 (+2)	XPO1	109 kDa	6.6329	2.1906	3.02789
DNA polymerase OS=Homo sapiens OX=9606 GN=POLD1 PE=1 SV=1	M0R2B7 (+1)	POLD1	126 kDa	6.6329	2.1906	3.02789
Glucosidase 2 subunit beta OS=Homo sapiens OX=9606 GN=PRKCSH PE=1 SV=1	K7ELL7 (+2)	PRKCSH	60 kDa	6.6329	2.1906	3.02789
Laminin subunit gamma-1 OS=Homo sapiens OX=9606 GN=LAMC1 PE=1 SV=3	P11047	LAMC1	178 kDa	5.9696	2.1906	2.7251
Acetyl-coenzyme A synthetase 2-like, mitochondrial OS=Homo sapiens OX=9606 GN=ACSS1 PE=1 SV=2	Q9NUB1 (+1)	ACSS1	75 kDa	3.9797	1.4604	2.72508
CCR4-NOT transcription complex subunit 2 OS=Homo sapiens OX=9606 GN=CNOT2 PE=1 SV=2	F8VUB4 (+2)	CNOT2	57 kDa	3.9797	1.4604	2.72508
Voltage-dependent anion-selective channel protein 3 OS=Homo sapiens OX=9606 GN=VDAC3 PE=1 SV=1	Q9Y277 (+1)	VDAC3	31 kDa	3.9797	1.4604	2.72508
Hypoxanthine-guanine phosphoribosyltransferase OS=Homo sapiens OX=9606 GN=HPRT1 PE=1 SV=2	P00492	HPRT1	25 kDa	3.9797	1.4604	2.72508
RNA-binding protein 12 OS=Homo sapiens OX=9606 GN=RBM12 PE=1 SV=1	Q9NTZ6	RBM12	97 kDa	3.9797	1.4604	2.72508
Gelsolin OS=Homo sapiens OX=9606 GN=GSN PE=1 SV=1	P06396	GSN	86 kDa	3.9797	1.4604	2.72508
RNA cytidine acetyltransferase OS=Homo sapiens OX=9606 GN=NAT10 PE=1 SV=2	Q9H0A0	NAT10	116 kDa	5.3063	2.1906	2.4223
Kinesin light chain OS=Homo sapiens OX=9606 GN=KLC1 PE=1 SV=1	G3V3H3 (+2)	KLC1	69 kDa	5.3063	2.1906	2.4223
Signal recognition particle receptor subunit beta OS=Homo sapiens OX=9606 GN=SRPRB PE=1 SV=3	Q9Y5M8	SRPRB	30 kDa	5.3063	2.1906	2.4223
Squamous cell carcinoma antigen recognized by T-cells 3 OS=Homo sapiens OX=9606 GN=SART3 PE=1 SV=1	A0A499FI31 (+2)	SART3	112 kDa	5.3063	2.1906	2.4223
Desmoglein-1 OS=Homo sapiens OX=9606 GN=DSG1 PE=1 SV=2	Q02413	DSG1	114 kDa	6.6329	2.9207	2.271
Vacuolar protein sorting-associated protein 35 OS=Homo sapiens OX=9606 GN=VPS35 PE=1 SV=2	Q96QK1	VPS35	92 kDa	6.6329	2.9207	2.271
Protein-L-isoaspartate O-methyltransferase OS=Homo sapiens OX=9606 GN=PCMT1 PE=1 SV=1	A0A0A0MRJ6 (+3)	PCMT1	30 kDa	3.3165	1.4604	2.27095
WASH complex subunit 2A OS=Homo sapiens OX=9606 GN=WASHC2A PE=1 SV=1	F8W7U3 (+2)	WASHC2A	137 kDa	3.3165	1.4604	2.27095
Cyclin-dependent kinase 11B OS=Homo sapiens OX=9606 GN=CDK11B PE=1 SV=1	A0A0D9SER5	CDK11B	90 kDa	3.3165	1.4604	2.27095
Extended synaptotagmin-1 OS=Homo sapiens OX=9606 GN=ESYT1 PE=1 SV=1	Q9BSJ8 (+1)	ESYT1	123 kDa	3.3165	1.4604	2.27095
Neutral amino acid transporter B(0) OS=Homo sapiens OX=9606 GN=SLC1A5 PE=1 SV=2	Q15758	SLC1A5	57 kDa	3.3165	1.4604	2.27095
Importin subunit alpha-4 OS=Homo sapiens OX=9606 GN=KPNA3 PE=1 SV=2	O00505	KPNA3	58 kDa	3.3165	1.4604	2.27095
UBX domain-containing protein 4 OS=Homo sapiens OX=9606 GN=UBXN4 PE=1 SV=2	Q92575	UBXN4	57 kDa	3.3165	1.4604	2.27095
Serine/threonine-protein phosphatase 6 regulatory subunit 3 OS=Homo sapiens OX=9606 GN=PPP6R3 PE=1 SV=1	E9PKF6 (+7)	PPP6R3	94 kDa	3.3165	1.4604	2.27095
Signal recognition particle 9 kDa protein OS=Homo sapiens OX=9606 GN=SRP9 PE=1 SV=2	P49458	SRP9	10 kDa	3.3165	1.4604	2.27095
Isoform 2 of U4/U6 small nuclear ribonucleoprotein Prp4 OS=Homo sapiens OX=9606 GN=PRPF4	O43172-2	PRPF4	58 kDa	3.3165	1.4604	2.27095
DnaJ homolog subfamily C member 21 OS=Homo sapiens OX=9606 GN=DNAJC21 PE=1 SV=2	Q5F1R6 (+2)	DNAJC21	62 kDa	3.3165	1.4604	2.27095
RNA N6-adenosine-methyltransferase METTL16 OS=Homo sapiens OX=9606 GN=METTL16 PE=1 SV=2	Q86W50	METTL16	64 kDa	3.3165	1.4604	2.27095
Sarcolemmal membrane-associated protein OS=Homo sapiens OX=9606 GN=SLMAP PE=1 SV=1	A0A590UJK3 (+1)	SLMAP	97 kDa	3.3165	1.4604	2.27095
N-acetylated-alpha-linked acidic dipeptidase 2 OS=Homo sapiens OX=9606 GN=NAALAD2 PE=1 SV=1	J3KNJ3 (+1)	NAALAD2	80 kDa	3.3165	1.4604	2.27095
Retinal dehydrogenase 1 OS=Homo sapiens OX=9606 GN=ALDH1A1 PE=1 SV=2	P00352	ALDH1A1	55 kDa	3.3165	1.4604	2.27095
F-actin-capping protein subunit alpha-2 OS=Homo sapiens OX=9606 GN=CAPZA2 PE=1 SV=3	P47755	CAPZA2	33 kDa	3.3165	1.4604	2.27095
Replication factor C subunit 5 OS=Homo sapiens OX=9606 GN=RFC5 PE=1 SV=1	P40937 (+1)	RFC5	38 kDa	3.3165	1.4604	2.27095
Exosome complex component RRP43 OS=Homo sapiens OX=9606 GN=EXOSC8 PE=1 SV=1	Q96B26	EXOSC8	30 kDa	3.3165	1.4604	2.27095
Striatin OS=Homo sapiens OX=9606 GN=STRN PE=1 SV=4	O43815	STRN	86 kDa	3.3165	1.4604	2.27095
Neuron navigator 2 OS=Homo sapiens OX=9606 GN=NAV2 PE=1 SV=1	A0A0A0MTE8 (+11)	NAV2	268 kDa	3.3165	1.4604	2.27095
CUG triplet repeat, RNA binding protein 1, isoform CRA_c OS=Homo sapiens OX=9606 GN=CELF1 PE=1 SV=1	G5EA30 (+6)	CELF1	55 kDa	3.3165	1.4604	2.27095
Single-stranded DNA-binding protein, mitochondrial OS=Homo sapiens OX=9606 GN=SSBP1 PE=1 SV=1	Q04837	SSBP1	17 kDa	3.3165	1.4604	2.27095
Endoplasmic reticulum resident protein 29 OS=Homo sapiens OX=9606 GN=ERP29 PE=1 SV=4	P30040	ERP29	29 kDa	3.3165	1.4604	2.27095
7-dehydrocholesterol reductase OS=Homo sapiens OX=9606 GN=DHCR7 PE=1 SV=1	Q9UBM7	DHCR7	54 kDa	3.3165	1.4604	2.27095
Histidine--tRNA ligase, cytoplasmic OS=Homo sapiens OX=9606 GN=HARS1 PE=1 SV=1	A0A6Q8PF47 (+6)	HARS1	57 kDa	3.3165	1.4604	2.27095
Negative elongation factor E OS=Homo sapiens OX=9606 GN=NELFE PE=1 SV=3	P18615	NELFE	43 kDa	3.3165	1.4604	2.27095
Calcium uptake protein 1, mitochondrial OS=Homo sapiens OX=9606 GN=MICU1 PE=1 SV=1	A0A0U1RRK1 (+4)	MICU1	55 kDa	3.3165	1.4604	2.27095
Prelamin-A/C OS=Homo sapiens OX=9606 GN=LMNA PE=1 SV=1	Q3BDU5	LMNA	56 kDa	3.3165	1.4604	2.27095
tRNA (adenine(58)-N(1))-methyltransferase non-catalytic subunit TRM6 OS=Homo sapiens OX=9606 GN=TRMT6 PE=1 SV=1	Q9UJA5	TRMT6	56 kDa	7.9595	3.6509	2.18015
Isoform 3 of Importin-5 OS=Homo sapiens OX=9606 GN=IPO5	O00410-3	IPO5	126 kDa	7.9595	3.6509	2.18015
BCL2-associated athanogene 6 OS=Homo sapiens OX=9606 GN=BAG6 PE=1 SV=1	A0A024RCR6 (+7)	BAG6	119 kDa	7.9595	3.6509	2.18015
Endoribonuclease Dicer OS=Homo sapiens OX=9606 GN=DICER1 PE=1 SV=3	Q9UPY3	DICER1	219 kDa	4.643	2.1906	2.11951
ATP-binding cassette sub-family E member 1 OS=Homo sapiens OX=9606 GN=ABCE1 PE=1 SV=1	P61221	ABCE1	67 kDa	4.643	2.1906	2.11951
UDP-N-acetylglucosamine--peptide N-acetylglucosaminyltransferase 110 kDa subunit OS=Homo sapiens OX=9606 GN=OGT PE=1 SV=3	O15294	OGT	117 kDa	4.643	2.1906	2.11951
Annexin A3 OS=Homo sapiens OX=9606 GN=ANXA3 PE=1 SV=3	P12429	ANXA3	36 kDa	4.643	2.1906	2.11951
ER membrane protein complex subunit 1 OS=Homo sapiens OX=9606 GN=EMC1 PE=1 SV=1	Q8N766 (+3)	EMC1	112 kDa	4.643	2.1906	2.11951
Isoform 2 of Translation initiation factor eIF-2B subunit delta OS=Homo sapiens OX=9606 GN=EIF2B4	Q9UI10-2 (+1)	EIF2B4	60 kDa	4.643	2.1906	2.11951
Proteasome subunit alpha type-1 OS=Homo sapiens OX=9606 GN=PSMA1 PE=1 SV=1	P25786 (+1)	PSMA1	30 kDa	5.9696	2.9207	2.04389
Transmembrane 9 superfamily member OS=Homo sapiens OX=9606 GN=TM9SF4 PE=1 SV=1	A0A0C4DFM1 (+1)	TM9SF4	73 kDa	5.9696	2.9207	2.04389
Prenylcysteine oxidase 1 OS=Homo sapiens OX=9606 GN=PCYOX1 PE=1 SV=3	Q9UHG3	PCYOX1	57 kDa	5.9696	2.9207	2.04389
Mitogen-activated protein kinase 1 OS=Homo sapiens OX=9606 GN=MAPK1 PE=1 SV=3	P28482	MAPK1	41 kDa	5.9696	2.9207	2.04389
NADPH--cytochrome P450 reductase OS=Homo sapiens OX=9606 GN=POR PE=1 SV=2	P16435	POR	77 kDa	5.9696	2.9207	2.04389
Keratin, type I cytoskeletal 27 OS=Homo sapiens OX=9606 GN=KRT27 PE=1 SV=2	Q7Z3Y8	KRT27	50 kDa	7.2962	3.6509	1.99847
Isoleucyl-tRNA synthetase OS=Homo sapiens OX=9606 GN=IARS1 PE=1 SV=1	A0A0A0MSX9 (+1)	IARS1	142 kDa	7.2962	3.6509	1.99847
RNA-binding protein PNO1 OS=Homo sapiens OX=9606 GN=PNO1 PE=1 SV=1	Q9NRX1	PNO1	28 kDa	7.2962	3.6509	1.99847
Probable helicase with zinc finger domain OS=Homo sapiens OX=9606 GN=HELZ PE=1 SV=2	P42694	HELZ	219 kDa	7.2962	3.6509	1.99847
Nuclear ubiquitous casein and cyclin-dependent kinase substrate 1 OS=Homo sapiens OX=9606 GN=NUCKS1 PE=1 SV=1	Q9H1E3	NUCKS1	27 kDa	5.3063	2.9207	1.81679
Endoplasmic reticulum-Golgi intermediate compartment protein 3 (Fragment) OS=Homo sapiens OX=9606 GN=ERGIC3 PE=1 SV=1	H0Y5K5 (+2)	ERGIC3	45 kDa	5.3063	2.9207	1.81679
Bifunctional purine biosynthesis protein ATIC OS=Homo sapiens OX=9606 GN=ATIC PE=1 SV=3	P31939 (+1)	ATIC	65 kDa	5.3063	2.9207	1.81679
Isocitrate dehydrogenase [NADP] cytoplasmic OS=Homo sapiens OX=9606 GN=IDH1 PE=1 SV=2	O75874	IDH1	47 kDa	5.3063	2.9207	1.81679
FERM, ARHGEF and pleckstrin domain-containing protein 1 OS=Homo sapiens OX=9606 GN=FARP1 PE=1 SV=1	Q9Y4F1	FARP1	119 kDa	5.3063	2.9207	1.81679
Elongation factor 1-alpha OS=Entamoeba histolytica HM-1:IMSS OX=294381 GN=EHI_052400 PE=2 SV=1	C4MAC9	EHI_052400	48 kDa	13.266	7.3019	1.81679
26S proteasome non-ATPase regulatory subunit 1 OS=Homo sapiens OX=9606 GN=PSMD1 PE=1 SV=2	Q99460 (+1)	PSMD1	106 kDa	6.6329	3.6509	1.81678
26S proteasome regulatory subunit 6A OS=Homo sapiens OX=9606 GN=PSMC3 PE=1 SV=3	P17980 (+1)	PSMC3	49 kDa	6.6329	3.6509	1.81678
Leucyl-tRNA synthetase OS=Homo sapiens OX=9606 GN=LARS1 PE=1 SV=1	A0A6I8PIV1 (+7)	LARS1	134 kDa	6.6329	3.6509	1.81678
Glutathione S-transferase P OS=Homo sapiens OX=9606 GN=GSTP1 PE=1 SV=2	P09211	GSTP1	23 kDa	6.6329	3.6509	1.81678
Cullin-associated NEDD8-dissociated protein 1 OS=Homo sapiens OX=9606 GN=CAND1 PE=1 SV=2	Q86VP6	CAND1	136 kDa	7.9595	4.3811	1.81678
Telomerase-binding protein EST1A OS=Homo sapiens OX=9606 GN=SMG6 PE=1 SV=2	Q86US8	SMG6	160 kDa	2.6532	1.4604	1.81676
Non-specific protein-tyrosine kinase OS=Homo sapiens OX=9606 GN=PTK2 PE=1 SV=1	E7ESA6 (+5)	PTK2	124 kDa	2.6532	1.4604	1.81676
Beta-hexosaminidase subunit beta OS=Homo sapiens OX=9606 GN=HEXB PE=1 SV=3	P07686	HEXB	63 kDa	2.6532	1.4604	1.81676
Parafibromin OS=Homo sapiens OX=9606 GN=CDC73 PE=1 SV=1	A0A1B0GUB2 (+1)	CDC73	51 kDa	2.6532	1.4604	1.81676
Cell division cycle protein 23 homolog OS=Homo sapiens OX=9606 GN=CDC23 PE=1 SV=3	Q9UJX2 (+1)	CDC23	69 kDa	2.6532	1.4604	1.81676
Peptidyl-prolyl cis-trans isomerase G OS=Homo sapiens OX=9606 GN=PPIG PE=4 SV=1	A0A7I2V5Q5 (+1)	PPIG	88 kDa	2.6532	1.4604	1.81676
Proteasome activator complex subunit 1 OS=Homo sapiens OX=9606 GN=PSME1 PE=1 SV=1	Q06323 (+2)	PSME1	29 kDa	2.6532	1.4604	1.81676
Zinc finger RNA-binding protein OS=Homo sapiens OX=9606 GN=ZFR PE=1 SV=2	Q96KR1	ZFR	117 kDa	2.6532	1.4604	1.81676
Dolichol-phosphate mannosyltransferase subunit 1 (Fragment) OS=Homo sapiens OX=9606 GN=DPM1 PE=1 SV=1	H0Y368 (+2)	DPM1	33 kDa	2.6532	1.4604	1.81676
Isoform 2 of Peptidyl-prolyl cis-trans isomerase FKBP8 OS=Homo sapiens OX=9606 GN=FKBP8	Q14318-2	FKBP8	45 kDa	2.6532	1.4604	1.81676
SWI/SNF complex subunit SMARCC1 OS=Homo sapiens OX=9606 GN=SMARCC1 PE=1 SV=3	Q92922	SMARCC1	123 kDa	2.6532	1.4604	1.81676
Mitochondrial import receptor subunit TOM22 homolog OS=Homo sapiens OX=9606 GN=TOMM22 PE=1 SV=3	Q9NS69	TOMM22	16 kDa	2.6532	1.4604	1.81676
Acyl-peptide hydrolase OS=Homo sapiens OX=9606 GN=APEH PE=1 SV=1	C9JIF9 (+1)	APEH	82 kDa	2.6532	1.4604	1.81676
RNA-binding protein 34 (Fragment) OS=Homo sapiens OX=9606 GN=RBM34 PE=1 SV=1	A2A2V2 (+1)	RBM34	46 kDa	2.6532	1.4604	1.81676
Replication initiator 1 OS=Homo sapiens OX=9606 GN=REPIN1 PE=1 SV=1	Q9BWE0 (+1)	REPIN1	64 kDa	2.6532	1.4604	1.81676
Serine palmitoyltransferase 2 OS=Homo sapiens OX=9606 GN=SPTLC2 PE=1 SV=1	O15270	SPTLC2	63 kDa	2.6532	1.4604	1.81676
Actin-like protein 6A OS=Homo sapiens OX=9606 GN=ACTL6A PE=1 SV=1	O96019 (+1)	ACTL6A	47 kDa	2.6532	1.4604	1.81676
Mortality factor 4-like protein 2 OS=Homo sapiens OX=9606 GN=MORF4L2 PE=1 SV=1	Q15014	MORF4L2	32 kDa	2.6532	1.4604	1.81676
26S proteasome regulatory subunit 6B OS=Homo sapiens OX=9606 GN=PSMC4 PE=1 SV=2	P43686	PSMC4	47 kDa	2.6532	1.4604	1.81676
Cleavage and polyadenylation-specificity factor subunit 7 (Fragment) OS=Homo sapiens OX=9606 GN=CPSF7 PE=1 SV=1	F5H669 (+3)	CPSF7	41 kDa	2.6532	1.4604	1.81676
40S ribosomal protein S28 OS=Homo sapiens OX=9606 GN=RPS28 PE=1 SV=1	P62857	RPS28	8 kDa	2.6532	1.4604	1.81676
Tensin-3 OS=Homo sapiens OX=9606 GN=TNS3 PE=1 SV=2	Q68CZ2 (+1)	TNS3	155 kDa	2.6532	1.4604	1.81676
tRNA pseudouridine synthase-like 1 OS=Homo sapiens OX=9606 GN=PUSL1 PE=1 SV=1	Q8N0Z8	PUSL1	33 kDa	2.6532	1.4604	1.81676
Focadhesin OS=Homo sapiens OX=9606 GN=FOCAD PE=1 SV=1	Q5VW36	FOCAD	200 kDa	2.6532	1.4604	1.81676
Lanosterol synthase OS=Homo sapiens OX=9606 GN=LSS PE=1 SV=1	P48449 (+1)	LSS	83 kDa	2.6532	1.4604	1.81676
Heterogeneous nuclear ribonucleoprotein L-like OS=Homo sapiens OX=9606 GN=HNRNPLL PE=1 SV=1	B7WPG3 (+5)	HNRNPLL	56 kDa	2.6532	1.4604	1.81676
WD40 repeat-containing protein SMU1 OS=Homo sapiens OX=9606 GN=SMU1 PE=1 SV=2	Q2TAY7	SMU1	58 kDa	2.6532	1.4604	1.81676
Membrane-associated progesterone receptor component 1 OS=Homo sapiens OX=9606 GN=PGRMC1 PE=1 SV=3	O00264	PGRMC1	22 kDa	2.6532	1.4604	1.81676
5'-AMP-activated protein kinase catalytic subunit alpha-1 OS=Homo sapiens OX=9606 GN=PRKAA1 PE=1 SV=4	Q13131 (+1)	PRKAA1	64 kDa	2.6532	1.4604	1.81676
39S ribosomal protein L19, mitochondrial OS=Homo sapiens OX=9606 GN=MRPL19 PE=1 SV=2	P49406	MRPL19	34 kDa	2.6532	1.4604	1.81676
Splicing factor 45 OS=Homo sapiens OX=9606 GN=RBM17 PE=1 SV=1	Q96I25	RBM17	45 kDa	2.6532	1.4604	1.81676
Programmed cell death 6-interacting protein OS=Homo sapiens OX=9606 GN=PDCD6IP PE=1 SV=1	Q8WUM4 (+1)	PDCD6IP	96 kDa	3.9797	2.1906	1.81672
Nucleolar protein 58 OS=Homo sapiens OX=9606 GN=NOP58 PE=1 SV=1	Q9Y2X3	NOP58	60 kDa	3.9797	2.1906	1.81672
40S ribosomal protein S26 OS=Homo sapiens OX=9606 GN=RPS26 PE=1 SV=3	P62854	RPS26	13 kDa	3.9797	2.1906	1.81672
Protein bicaudal C homolog 1 OS=Homo sapiens OX=9606 GN=BICC1 PE=1 SV=2	Q9H694	BICC1	105 kDa	3.9797	2.1906	1.81672
Transcription factor BTF3 OS=Homo sapiens OX=9606 GN=BTF3 PE=1 SV=1	P20290	BTF3	22 kDa	3.9797	2.1906	1.81672
Dolichyl-diphosphooligosaccharide--protein glycosyltransferase subunit STT3B OS=Homo sapiens OX=9606 GN=STT3B PE=1 SV=1	Q8TCJ2	STT3B	94 kDa	3.9797	2.1906	1.81672
Actin-related protein 2 OS=Homo sapiens OX=9606 GN=ACTR2 PE=1 SV=1	P61160	ACTR2	45 kDa	3.9797	2.1906	1.81672
Coiled-coil domain-containing protein 137 OS=Homo sapiens OX=9606 GN=CCDC137 PE=1 SV=1	Q6PK04	CCDC137	33 kDa	3.9797	2.1906	1.81672
Calponin OS=Homo sapiens OX=9606 GN=CNN2 PE=1 SV=1	B4DDF4 (+2)	CNN2	33 kDa	3.9797	2.1906	1.81672
Component 3 of promoter of RISC OS=Homo sapiens OX=9606 GN=TSN PE=1 SV=1	E9PGT1 (+1)	TSN	26 kDa	3.9797	2.1906	1.81672
Delta(24)-sterol reductase OS=Homo sapiens OX=9606 GN=DHCR24 PE=1 SV=1	A0A0A0MTI1 (+1)	DHCR24	61 kDa	3.9797	2.1906	1.81672
Unconventional myosin-Ib OS=Homo sapiens OX=9606 GN=MYO1B PE=1 SV=1	E9PDF6 (+2)	MYO1B	128 kDa	3.9797	2.1906	1.81672
Band 4.1-like protein 1 OS=Homo sapiens OX=9606 GN=EPB41L1 PE=1 SV=2	Q9H4G0	EPB41L1	99 kDa	8.6228	5.1113	1.68701
T-complex protein 1 subunit zeta OS=Homo sapiens OX=9606 GN=CCT6A PE=1 SV=3	P40227	CCT6A	58 kDa	8.6228	5.1113	1.68701
PAT complex subunit CCDC47 OS=Homo sapiens OX=9606 GN=CCDC47 PE=1 SV=1	Q96A33	CCDC47	56 kDa	8.6228	5.1113	1.68701
Coatomer subunit beta' OS=Homo sapiens OX=9606 GN=COPB2 PE=4 SV=1	A0A7I2V258 (+4)	COPB2	94 kDa	7.2962	4.3811	1.66538
Retrotransposon-derived protein PEG10 OS=Homo sapiens OX=9606 GN=PEG10 PE=1 SV=2	A0A087WUL4	PEG10	84 kDa	7.2962	4.3811	1.66538
26S proteasome regulatory subunit 7 OS=Homo sapiens OX=9606 GN=PSMC2 PE=1 SV=1	C9JX88 (+1)	PSMC2	48 kDa	7.2962	4.3811	1.66538
Signal recognition particle receptor subunit alpha OS=Homo sapiens OX=9606 GN=SRPRA PE=1 SV=2	P08240	SRPRA	70 kDa	7.2962	4.3811	1.66538
Ras-related protein Rab-8A OS=Homo sapiens OX=9606 GN=RAB8A PE=1 SV=1	P61006	RAB8A	24 kDa	7.2962	4.3811	1.66538
1-phosphatidylinositol 4,5-bisphosphate phosphodiesterase beta-3 OS=Homo sapiens OX=9606 GN=PLCB3 PE=1 SV=2	Q01970	PLCB3	139 kDa	7.2962	4.3811	1.66538
Coronin-1B OS=Homo sapiens OX=9606 GN=CORO1B PE=1 SV=1	Q9BR76	CORO1B	54 kDa	5.9696	3.6509	1.6351
Epoxide hydrolase 1 OS=Homo sapiens OX=9606 GN=EPHX1 PE=1 SV=1	P07099	EPHX1	53 kDa	5.9696	3.6509	1.6351
Methionine--tRNA ligase, cytoplasmic OS=Homo sapiens OX=9606 GN=MARS1 PE=1 SV=2	P56192	MARS1	101 kDa	5.9696	3.6509	1.6351
Vinculin OS=Homo sapiens OX=9606 GN=VCL PE=1 SV=4	P18206 (+1)	VCL	124 kDa	11.939	7.3019	1.63505
Nucleolar GTP-binding protein 1 OS=Homo sapiens OX=9606 GN=GTPBP4 PE=1 SV=3	Q9BZE4	GTPBP4	74 kDa	11.939	7.3019	1.63505
Protein disulfide-isomerase OS=Homo sapiens OX=9606 GN=P4HB PE=1 SV=2	H7BZ94 (+1)	P4HB	53 kDa	23.878	14.604	1.63503
Putative ATP-dependent RNA helicase DHX57 OS=Homo sapiens OX=9606 GN=DHX57 PE=1 SV=2	Q6P158	DHX57	156 kDa	10.613	6.5717	1.61496
Cdc42-interacting protein 4 OS=Homo sapiens OX=9606 GN=TRIP10 PE=1 SV=3	Q15642 (+4)	TRIP10	68 kDa	10.613	6.5717	1.61496
Liver carboxylesterase 1 OS=Homo sapiens OX=9606 GN=CES1 PE=1 SV=2	P23141 (+2)	CES1	63 kDa	4.643	2.9207	1.58969
AIR carboxylase (Fragment) OS=Homo sapiens OX=9606 GN=PAICS PE=1 SV=1	E9PBS1 (+2)	PAICS	46 kDa	4.643	2.9207	1.58969
Annexin A9 OS=Homo sapiens OX=9606 GN=ANXA9 PE=1 SV=3	O76027	ANXA9	38 kDa	4.643	2.9207	1.58969
Plasma membrane calcium-transporting ATPase 1 OS=Homo sapiens OX=9606 GN=ATP2B1 PE=1 SV=4	P20020 (+5)	ATP2B1	135 kDa	4.643	2.9207	1.58969
Protein phosphatase 1G OS=Homo sapiens OX=9606 GN=PPM1G PE=1 SV=1	O15355	PPM1G	59 kDa	4.643	2.9207	1.58969
Ras-related protein Rab-2A OS=Homo sapiens OX=9606 GN=RAB2A PE=1 SV=1	P61019	RAB2A	24 kDa	4.643	2.9207	1.58969
Negative elongation factor A OS=Homo sapiens OX=9606 GN=NELFA PE=1 SV=1	A0A0C4DFX9 (+1)	NELFA	59 kDa	4.643	2.9207	1.58969
Kelch domain-containing protein 4 OS=Homo sapiens OX=9606 GN=KLHDC4 PE=1 SV=1	Q8TBB5 (+1)	KLHDC4	58 kDa	4.643	2.9207	1.58969
Synaptic vesicle membrane protein VAT-1 homolog OS=Homo sapiens OX=9606 GN=VAT1 PE=1 SV=2	Q99536	VAT1	42 kDa	4.643	2.9207	1.58969
Ribosomal RNA small subunit methyltransferase NEP1 OS=Homo sapiens OX=9606 GN=EMG1 PE=1 SV=4	Q92979	EMG1	27 kDa	4.643	2.9207	1.58969
Sequestosome-1 OS=Homo sapiens OX=9606 GN=SQSTM1 PE=1 SV=1	Q13501 (+1)	SQSTM1	48 kDa	4.643	2.9207	1.58969
Extended synaptotagmin-2 OS=Homo sapiens OX=9606 GN=ESYT2 PE=1 SV=1	A0A499FIX8 (+2)	ESYT2	94 kDa	4.643	2.9207	1.58969
Rab-like protein 6 OS=Homo sapiens OX=9606 GN=RABL6 PE=1 SV=2	Q3YEC7 (+1)	RABL6	80 kDa	4.643	2.9207	1.58969
Serine hydroxymethyltransferase, mitochondrial OS=Homo sapiens OX=9606 GN=SHMT2 PE=1 SV=3	P34897 (+1)	SHMT2	56 kDa	9.2861	5.8415	1.58968
Far upstream element-binding protein 3 OS=Homo sapiens OX=9606 GN=FUBP3 PE=1 SV=2	Q96I24	FUBP3	62 kDa	13.929	8.7622	1.58967
T-complex protein 1 subunit alpha OS=Homo sapiens OX=9606 GN=TCP1 PE=1 SV=1	P17987	TCP1	60 kDa	12.603	8.0321	1.56908
Alpha-adducin OS=Homo sapiens OX=9606 GN=ADD1 PE=1 SV=1	E7ENY0 (+5)	ADD1	73 kDa	7.9595	5.1113	1.55724
LINE-1 retrotransposable element ORF1 protein OS=Homo sapiens OX=9606 GN=L1RE1 PE=1 SV=1	Q9UN81	L1RE1	40 kDa	7.9595	5.1113	1.55724
Sphingosine-1-phosphate lyase 1 OS=Homo sapiens OX=9606 GN=SGPL1 PE=1 SV=3	O95470	SGPL1	64 kDa	11.276	7.3019	1.54426
26S proteasome regulatory subunit 8 OS=Homo sapiens OX=9606 GN=PSMC5 PE=1 SV=1	P62195 (+1)	PSMC5	46 kDa	6.6329	4.3811	1.51398
Replication factor C subunit 1 OS=Homo sapiens OX=9606 GN=RFC1 PE=1 SV=4	P35251 (+1)	RFC1	128 kDa	6.6329	4.3811	1.51398
Protein LYRIC OS=Homo sapiens OX=9606 GN=MTDH PE=1 SV=2	Q86UE4	MTDH	64 kDa	6.6329	4.3811	1.51398
2'-5'-oligoadenylate synthase 3 OS=Homo sapiens OX=9606 GN=OAS3 PE=1 SV=3	Q9Y6K5	OAS3	121 kDa	6.6329	4.3811	1.51398
Pumilio homolog 2 (Fragment) OS=Homo sapiens OX=9606 GN=PUM2 PE=1 SV=1	A0A0C4DG68 (+2)	PUM2	94 kDa	6.6329	4.3811	1.51398
Laminin subunit beta-1 OS=Homo sapiens OX=9606 GN=LAMB1 PE=4 SV=1	A0A7I2V4J9 (+2)	LAMB1	187 kDa	6.6329	4.3811	1.51398
Doublecortin domain-containing protein 2 OS=Homo sapiens OX=9606 GN=DCDC2 PE=1 SV=2	Q9UHG0	DCDC2	53 kDa	6.6329	4.3811	1.51398
60S ribosomal protein L36a-like OS=Homo sapiens OX=9606 GN=RPL36AL PE=1 SV=3	Q969Q0	RPL36AL	12 kDa	6.6329	4.3811	1.51398
Annexin A5 OS=Homo sapiens OX=9606 GN=ANXA5 PE=1 SV=2	P08758	ANXA5	36 kDa	6.6329	4.3811	1.51398
14-3-3 protein eta OS=Homo sapiens OX=9606 GN=YWHAH PE=1 SV=4	Q04917	YWHAH	28 kDa	6.6329	4.3811	1.51398
Transferrin receptor protein 1 OS=Homo sapiens OX=9606 GN=TFRC PE=1 SV=2	P02786	TFRC	85 kDa	9.9494	6.5717	1.51398
Transmembrane emp24 domain-containing protein 4 OS=Homo sapiens OX=9606 GN=TMED4 PE=1 SV=1	Q7Z7H5 (+1)	TMED4	26 kDa	3.3165	2.1906	1.51397
Cathepsin B OS=Homo sapiens OX=9606 GN=CTSB PE=4 SV=1	A0A7I2V440 (+3)	CTSB	40 kDa	3.3165	2.1906	1.51397
26S proteasome regulatory subunit 10B OS=Homo sapiens OX=9606 GN=PSMC6 PE=1 SV=1	A0A087X2I1 (+1)	PSMC6	46 kDa	3.3165	2.1906	1.51397
PHD finger protein 6 OS=Homo sapiens OX=9606 GN=PHF6 PE=1 SV=1	A0A0D9SGE8 (+6)	PHF6	41 kDa	3.3165	2.1906	1.51397
Nuclear autoantigenic sperm protein OS=Homo sapiens OX=9606 GN=NASP PE=1 SV=2	P49321	NASP	85 kDa	3.3165	2.1906	1.51397
Squalene synthase OS=Homo sapiens OX=9606 GN=FDFT1 PE=1 SV=1	P37268	FDFT1	48 kDa	3.3165	2.1906	1.51397
Cadherin-1 OS=Homo sapiens OX=9606 GN=CDH1 PE=1 SV=1	A0A087WXI5 (+2)	CDH1	100 kDa	3.3165	2.1906	1.51397
Fatty acyl-CoA reductase 1 OS=Homo sapiens OX=9606 GN=FAR1 PE=1 SV=1	Q8WVX9	FAR1	59 kDa	3.3165	2.1906	1.51397
Glucose-6-phosphate isomerase OS=Homo sapiens OX=9606 GN=GPI PE=1 SV=1	A0A2U3TZU2 (+3)	GPI	67 kDa	3.3165	2.1906	1.51397
ADP-ribosylation factor GTPase-activating protein 1 OS=Homo sapiens OX=9606 GN=ARFGAP1 PE=1 SV=1	F8VWH9 (+4)	ARFGAP1	37 kDa	3.3165	2.1906	1.51397
PC4 and SFRS1-interacting protein OS=Homo sapiens OX=9606 GN=PSIP1 PE=1 SV=1	O75475	PSIP1	60 kDa	3.3165	2.1906	1.51397
28S ribosomal protein S22, mitochondrial OS=Homo sapiens OX=9606 GN=MRPS22 PE=1 SV=1	G5E9W7 (+1)	MRPS22	37 kDa	3.3165	2.1906	1.51397
Microsomal signal peptidase 25 kDa subunit OS=Homo sapiens OX=9606 GN=SPCS2 PE=1 SV=1	A0A087WUC6 (+2)	SPCS2	25 kDa	3.3165	2.1906	1.51397
Ras-related protein Rab-18 (Fragment) OS=Homo sapiens OX=9606 GN=RAB18 PE=1 SV=1	H0Y6T8 (+2)	RAB18	33 kDa	3.3165	2.1906	1.51397
Transmembrane protein 109 OS=Homo sapiens OX=9606 GN=TMEM109 PE=1 SV=1	Q9BVC6	TMEM109	26 kDa	3.3165	2.1906	1.51397
Histone-binding protein RBBP7 OS=Homo sapiens OX=9606 GN=RBBP7 PE=1 SV=1	Q16576 (+1)	RBBP7	48 kDa	3.3165	2.1906	1.51397
26S proteasome non-ATPase regulatory subunit 6 OS=Homo sapiens OX=9606 GN=PSMD6 PE=1 SV=1	Q15008 (+1)	PSMD6	46 kDa	3.3165	2.1906	1.51397
RNA-binding protein 28 OS=Homo sapiens OX=9606 GN=RBM28 PE=1 SV=3	Q9NW13	RBM28	86 kDa	3.3165	2.1906	1.51397
3-hydroxyisobutyrate dehydrogenase, mitochondrial OS=Homo sapiens OX=9606 GN=HIBADH PE=1 SV=2	P31937	HIBADH	35 kDa	3.3165	2.1906	1.51397
Prominin-1 OS=Homo sapiens OX=9606 GN=PROM1 PE=1 SV=1	O43490 (+6)	PROM1	97 kDa	3.3165	2.1906	1.51397
TRMT1-like protein OS=Homo sapiens OX=9606 GN=TRMT1L PE=1 SV=2	Q7Z2T5	TRMT1L	82 kDa	3.3165	2.1906	1.51397
Cullin-2 OS=Homo sapiens OX=9606 GN=CUL2 PE=1 SV=1	A0A0A0MTN0 (+2)	CUL2	89 kDa	3.3165	2.1906	1.51397
Probable ATP-dependent RNA helicase DDX10 OS=Homo sapiens OX=9606 GN=DDX10 PE=1 SV=2	Q13206	DDX10	101 kDa	3.3165	2.1906	1.51397
Polymerase delta-interacting protein 2 OS=Homo sapiens OX=9606 GN=POLDIP2 PE=1 SV=1	B4DEM9 (+1)	POLDIP2	40 kDa	3.3165	2.1906	1.51397
39S ribosomal protein L16, mitochondrial OS=Homo sapiens OX=9606 GN=MRPL16 PE=1 SV=1	Q9NX20	MRPL16	28 kDa	3.3165	2.1906	1.51397
Proteasome subunit beta type-7 OS=Homo sapiens OX=9606 GN=PSMB7 PE=1 SV=1	Q99436	PSMB7	30 kDa	3.3165	2.1906	1.51397
Glutathione reductase, mitochondrial OS=Homo sapiens OX=9606 GN=GSR PE=1 SV=2	P00390 (+4)	GSR	56 kDa	3.3165	2.1906	1.51397
Testin OS=Homo sapiens OX=9606 GN=TES PE=1 SV=1	Q9UGI8 (+1)	TES	48 kDa	3.3165	2.1906	1.51397
Creatine kinase B-type OS=Homo sapiens OX=9606 GN=CKB PE=1 SV=1	P12277	CKB	43 kDa	3.3165	2.1906	1.51397
Minor histocompatibility antigen H13 OS=Homo sapiens OX=9606 GN=HM13 PE=1 SV=1	A0A3B3IUB5 (+2)	HM13	46 kDa	8.6228	5.8415	1.47613
Alkyldihydroxyacetonephosphate synthase, peroxisomal OS=Homo sapiens OX=9606 GN=AGPS PE=1 SV=1	O00116	AGPS	73 kDa	8.6228	5.8415	1.47613
Phosphoglycerate kinase 1 OS=Homo sapiens OX=9606 GN=PGK1 PE=1 SV=3	P00558 (+1)	PGK1	45 kDa	8.6228	5.8415	1.47613
Isoform 2 of Tropomyosin alpha-3 chain OS=Homo sapiens OX=9606 GN=TPM3	P06753-2	TPM3	29 kDa	8.6228	5.8415	1.47613
D-3-phosphoglycerate dehydrogenase OS=Homo sapiens OX=9606 GN=PHGDH PE=1 SV=1	A0A286YF22 (+2)	PHGDH	56 kDa	8.6228	5.8415	1.47613
Calnexin OS=Homo sapiens OX=9606 GN=CANX PE=1 SV=2	P27824 (+1)	CANX	68 kDa	8.6228	5.8415	1.47613
Procollagen-lysine,2-oxoglutarate 5-dioxygenase 1 OS=Homo sapiens OX=9606 GN=PLOD1 PE=1 SV=2	Q02809 (+1)	PLOD1	84 kDa	8.6228	5.8415	1.47613
Keratin, type II cytoskeletal 4 OS=Homo sapiens OX=9606 GN=KRT4 PE=1 SV=5	P19013	KRT4	56 kDa	10.613	7.3019	1.45346
26S proteasome non-ATPase regulatory subunit 3 OS=Homo sapiens OX=9606 GN=PSMD3 PE=1 SV=2	O43242	PSMD3	61 kDa	10.613	7.3019	1.45346
Serine/threonine-protein phosphatase 2A 65 kDa regulatory subunit A alpha isoform OS=Homo sapiens OX=9606 GN=PPP2R1A PE=1 SV=4	P30153	PPP2R1A	65 kDa	10.613	7.3019	1.45346
DNA mismatch repair protein Msh2 OS=Homo sapiens OX=9606 GN=MSH2 PE=1 SV=1	P43246 (+1)	MSH2	105 kDa	5.3063	3.6509	1.45342
Proteasome subunit alpha type-7 OS=Homo sapiens OX=9606 GN=PSMA7 PE=1 SV=1	O14818	PSMA7	28 kDa	5.3063	3.6509	1.45342
Ubiquitin-like modifier-activating enzyme 1 OS=Homo sapiens OX=9606 GN=UBA1 PE=1 SV=3	P22314 (+1)	UBA1	118 kDa	5.3063	3.6509	1.45342
Vesicular integral-membrane protein VIP36 OS=Homo sapiens OX=9606 GN=LMAN2 PE=1 SV=1	Q12907	LMAN2	40 kDa	5.3063	3.6509	1.45342
Valyl-tRNA synthetase (Fragment) OS=Homo sapiens OX=9606 GN=VARS1 PE=1 SV=1	A0A140T936	VARS1	132 kDa	5.3063	3.6509	1.45342
GTPase Era, mitochondrial OS=Homo sapiens OX=9606 GN=ERAL1 PE=1 SV=2	O75616	ERAL1	48 kDa	5.3063	3.6509	1.45342
Replication protein A 70 kDa DNA-binding subunit OS=Homo sapiens OX=9606 GN=RPA1 PE=1 SV=2	P27694	RPA1	68 kDa	5.3063	3.6509	1.45342
V-type proton ATPase 116 kDa subunit a1 OS=Homo sapiens OX=9606 GN=ATP6V0A1 PE=1 SV=3	Q93050 (+2)	ATP6V0A1	96 kDa	5.3063	3.6509	1.45342
Tubulin gamma-1 chain OS=Homo sapiens OX=9606 GN=TUBG1 PE=1 SV=2	P23258	TUBG1	51 kDa	5.3063	3.6509	1.45342
N-alpha-acetyltransferase 10 OS=Homo sapiens OX=9606 GN=NAA10 PE=1 SV=1	P41227 (+1)	NAA10	26 kDa	5.3063	3.6509	1.45342
Isoform 3 of Coronin-1C OS=Homo sapiens OX=9606 GN=CORO1C	Q9ULV4-3	CORO1C	59 kDa	5.3063	3.6509	1.45342
Serine/threonine-protein kinase 24 OS=Homo sapiens OX=9606 GN=STK24 PE=1 SV=1	B4DR80 (+2)	STK24	46 kDa	5.3063	3.6509	1.45342
RNA polymerase II-associated protein 3 OS=Homo sapiens OX=9606 GN=RPAP3 PE=1 SV=2	Q9H6T3 (+1)	RPAP3	76 kDa	5.3063	3.6509	1.45342
Collagen alpha-1(XVIII) chain OS=Homo sapiens OX=9606 GN=COL18A1 PE=1 SV=5	P39060 (+2)	COL18A1	178 kDa	5.3063	3.6509	1.45342
Coiled-coil domain-containing protein 86 OS=Homo sapiens OX=9606 GN=CCDC86 PE=1 SV=1	Q9H6F5	CCDC86	40 kDa	5.3063	3.6509	1.45342
Gem-associated protein 4 OS=Homo sapiens OX=9606 GN=GEMIN4 PE=1 SV=1	I3L2C7 (+1)	GEMIN4	119 kDa	5.3063	3.6509	1.45342
Alpha-actinin-4 OS=Homo sapiens OX=9606 GN=ACTN4 PE=1 SV=2	O43707	ACTN4	105 kDa	17.909	12.413	1.44276
Glutamine--tRNA ligase OS=Homo sapiens OX=9606 GN=QARS1 PE=1 SV=1	P47897	QARS1	88 kDa	12.603	8.7622	1.43834
Double-strand break repair protein MRE11 OS=Homo sapiens OX=9606 GN=MRE11 PE=1 SV=3	P49959 (+1)	MRE11	81 kDa	7.2962	5.1113	1.42746
Nodal modulator 1 OS=Homo sapiens OX=9606 GN=NOMO1 PE=1 SV=1	A0A087X117 (+2)	NOMO1	139 kDa	7.2962	5.1113	1.42746
Dipeptidyl peptidase 4 OS=Homo sapiens OX=9606 GN=DPP4 PE=4 SV=1	A0A7I2V2R5 (+2)	DPP4	85 kDa	7.2962	5.1113	1.42746
Pyruvate dehydrogenase E1 component subunit alpha, somatic form, mitochondrial OS=Homo sapiens OX=9606 GN=PDHA1 PE=1 SV=3	P08559 (+3)	PDHA1	43 kDa	7.2962	5.1113	1.42746
Spliceosome RNA helicase DDX39B OS=Homo sapiens OX=9606 GN=DDX39B PE=1 SV=1	Q13838 (+1)	DDX39B	49 kDa	7.2962	5.1113	1.42746
Programmed cell death protein 4 OS=Homo sapiens OX=9606 GN=PDCD4 PE=1 SV=2	Q53EL6 (+1)	PDCD4	52 kDa	7.2962	5.1113	1.42746
GRB10-interacting GYF protein 2 OS=Homo sapiens OX=9606 GN=GIGYF2 PE=1 SV=1	Q6Y7W6 (+2)	GIGYF2	150 kDa	9.2861	6.5717	1.41304
Unconventional myosin-6 OS=Homo sapiens OX=9606 GN=MYO6 PE=1 SV=1	A0A0A0MRM8 (+2)	MYO6	145 kDa	9.2861	6.5717	1.41304
Glycine dehydrogenase (decarboxylating), mitochondrial OS=Homo sapiens OX=9606 GN=GLDC PE=1 SV=2	P23378	GLDC	113 kDa	9.2861	6.5717	1.41304
14-3-3 protein zeta/delta OS=Homo sapiens OX=9606 GN=YWHAZ PE=1 SV=1	P63104	YWHAZ	28 kDa	9.2861	6.5717	1.41304
Splicing factor 3B subunit 3 OS=Homo sapiens OX=9606 GN=SF3B3 PE=1 SV=4	Q15393	SF3B3	136 kDa	11.276	8.0321	1.40387
60S ribosomal protein L14 OS=Homo sapiens OX=9606 GN=RPL14 PE=1 SV=1	E7EPB3 (+1)	RPL14	15 kDa	11.276	8.0321	1.40387
Septin-2 OS=Homo sapiens OX=9606 GN=SEPTIN2 PE=1 SV=1	Q15019 (+1)	SEPTIN2	41 kDa	13.266	9.4924	1.39754
Structural maintenance of chromosomes protein 3 OS=Homo sapiens OX=9606 GN=SMC3 PE=1 SV=2	Q9UQE7	SMC3	142 kDa	13.266	9.4924	1.39754
Tubulin beta-4B chain OS=Homo sapiens OX=9606 GN=TUBB4B PE=1 SV=1	P68371	TUBB4B	50 kDa	19.235	13.874	1.38641
Bifunctional glutamate/proline--tRNA ligase OS=Homo sapiens OX=9606 GN=EPRS1 PE=1 SV=5	P07814	EPRS1	171 kDa	23.215	16.794	1.38234
La-related protein 1 OS=Homo sapiens OX=9606 GN=LARP1 PE=1 SV=2	Q6PKG0	LARP1	124 kDa	23.215	16.794	1.38234
Phosphoenolpyruvate carboxykinase (GTP) OS=Homo sapiens OX=9606 GN=PCK2 PE=1 SV=1	H0YML5 (+2)	PCK2	52 kDa	3.9797	2.9207	1.36258
Collagen alpha-1(II) chain OS=Homo sapiens OX=9606 GN=COL2A1 PE=1 SV=3	P02458 (+1)	COL2A1	142 kDa	3.9797	2.9207	1.36258
Cofilin, non-muscle isoform OS=Homo sapiens OX=9606 GN=CFL1 PE=1 SV=1	E9PK25 (+3)	CFL1	23 kDa	3.9797	2.9207	1.36258
Negative elongation factor B OS=Homo sapiens OX=9606 GN=NELFB PE=1 SV=1	A0A5H1ZRP4 (+1)	NELFB	70 kDa	3.9797	2.9207	1.36258
CCR4-NOT transcription complex subunit 9 OS=Homo sapiens OX=9606 GN=CNOT9 PE=1 SV=1	Q92600	CNOT9	34 kDa	3.9797	2.9207	1.36258
Dihydroxyacetone phosphate acyltransferase OS=Homo sapiens OX=9606 GN=GNPAT PE=1 SV=1	O15228	GNPAT	77 kDa	3.9797	2.9207	1.36258
Proteasome subunit beta type-5 OS=Homo sapiens OX=9606 GN=PSMB5 PE=1 SV=3	P28074	PSMB5	28 kDa	3.9797	2.9207	1.36258
Proteasome subunit alpha type-5 OS=Homo sapiens OX=9606 GN=PSMA5 PE=1 SV=3	P28066	PSMA5	26 kDa	3.9797	2.9207	1.36258
Quinone oxidoreductase OS=Homo sapiens OX=9606 GN=CRYZ PE=1 SV=1	Q08257	CRYZ	35 kDa	3.9797	2.9207	1.36258
Protein CDV3 homolog OS=Homo sapiens OX=9606 GN=CDV3 PE=1 SV=1	Q9UKY7	CDV3	27 kDa	3.9797	2.9207	1.36258
Serine palmitoyltransferase 1 OS=Homo sapiens OX=9606 GN=SPTLC1 PE=1 SV=1	O15269	SPTLC1	53 kDa	3.9797	2.9207	1.36258
Transmembrane protein 214 OS=Homo sapiens OX=9606 GN=TMEM214 PE=1 SV=2	Q6NUQ4 (+1)	TMEM214	77 kDa	3.9797	2.9207	1.36258
Lysosome-associated membrane glycoprotein 1 OS=Homo sapiens OX=9606 GN=LAMP1 PE=1 SV=3	P11279	LAMP1	45 kDa	3.9797	2.9207	1.36258
Acyl-coenzyme A thioesterase 9, mitochondrial OS=Homo sapiens OX=9606 GN=ACOT9 PE=1 SV=2	Q9Y305 (+3)	ACOT9	50 kDa	3.9797	2.9207	1.36258
Catenin beta-1 OS=Homo sapiens OX=9606 GN=CTNNB1 PE=1 SV=1	A0A2R8Y543 (+9)	CTNNB1	78 kDa	5.9696	4.3811	1.36258
Endoplasmic reticulum transmembrane helix translocase OS=Homo sapiens OX=9606 GN=ATP13A1 PE=1 SV=2	Q9HD20 (+1)	ATP13A1	133 kDa	5.9696	4.3811	1.36258
Phosphate carrier protein, mitochondrial OS=Homo sapiens OX=9606 GN=SLC25A3 PE=1 SV=2	Q00325 (+1)	SLC25A3	40 kDa	5.9696	4.3811	1.36258
RING finger protein 214 OS=Homo sapiens OX=9606 GN=RNF214 PE=1 SV=2	Q8ND24	RNF214	78 kDa	5.9696	4.3811	1.36258
Isoform 2 of Succinate dehydrogenase [ubiquinone] flavoprotein subunit, mitochondrial OS=Homo sapiens OX=9606 GN=SDHA	P31040-2	SDHA	67 kDa	5.9696	4.3811	1.36258
Medium-chain specific acyl-CoA dehydrogenase, mitochondrial OS=Homo sapiens OX=9606 GN=ACADM PE=1 SV=1	B7Z9I1 (+3)	ACADM	42 kDa	5.9696	4.3811	1.36258
Myristoylated alanine-rich C-kinase substrate OS=Homo sapiens OX=9606 GN=MARCKS PE=1 SV=4	P29966	MARCKS	32 kDa	5.9696	4.3811	1.36258
B-cell receptor-associated protein 31 OS=Homo sapiens OX=9606 GN=BCAP31 PE=1 SV=3	P51572 (+1)	BCAP31	28 kDa	5.9696	4.3811	1.36258
60S ribosomal protein L23 OS=Homo sapiens OX=9606 GN=RPL23 PE=1 SV=1	P62829	RPL23	15 kDa	5.9696	4.3811	1.36258
Histone H1.0 OS=Homo sapiens OX=9606 GN=H1-0 PE=1 SV=3	P07305 (+1)	H1-0	21 kDa	5.9696	4.3811	1.36258
60S ribosomal protein L37a OS=Homo sapiens OX=9606 GN=RPL37A PE=1 SV=1	E9PEL3 (+3)	RPL37A	8 kDa	5.9696	4.3811	1.36258
ATP-dependent RNA helicase DDX39A OS=Homo sapiens OX=9606 GN=DDX39A PE=1 SV=2	O00148	DDX39A	49 kDa	5.9696	4.3811	1.36258
Isoform 7 of Interleukin enhancer-binding factor 3 OS=Homo sapiens OX=9606 GN=ILF3	Q12906-7	ILF3	96 kDa	15.919	11.683	1.36258
Aldehyde dehydrogenase, mitochondrial OS=Homo sapiens OX=9606 GN=ALDH2 PE=1 SV=2	P05091	ALDH2	56 kDa	7.9595	5.8415	1.36258
Spermatogenesis-associated serine-rich protein 2 OS=Homo sapiens OX=9606 GN=SPATS2 PE=1 SV=1	Q86XZ4	SPATS2	60 kDa	9.9494	7.3019	1.36258
14-3-3 protein theta OS=Homo sapiens OX=9606 GN=YWHAQ PE=1 SV=1	P27348	YWHAQ	28 kDa	9.9494	7.3019	1.36258
Guanine nucleotide-binding protein-like 3 OS=Homo sapiens OX=9606 GN=GNL3 PE=1 SV=2	Q9BVP2 (+1)	GNL3	62 kDa	9.9494	7.3019	1.36258
Isoform 1B of Desmocollin-1 OS=Homo sapiens OX=9606 GN=DSC1	Q08554-2	DSC1	94 kDa	1.9899	1.4604	1.36257
Transport and Golgi organization protein 1 homolog OS=Homo sapiens OX=9606 GN=MIA3 PE=1 SV=1	Q5JRA6	MIA3	214 kDa	1.9899	1.4604	1.36257
4-trimethylaminobutyraldehyde dehydrogenase OS=Homo sapiens OX=9606 GN=ALDH9A1 PE=1 SV=3	P49189 (+1)	ALDH9A1	54 kDa	1.9899	1.4604	1.36257
Opioid growth factor receptor OS=Homo sapiens OX=9606 GN=OGFR PE=1 SV=3	Q9NZT2 (+1)	OGFR	73 kDa	1.9899	1.4604	1.36257
WD repeat-containing protein 61 (Fragment) OS=Homo sapiens OX=9606 GN=WDR61 PE=1 SV=1	H0YN81 (+1)	WDR61	32 kDa	1.9899	1.4604	1.36257
Lipolysis-stimulated lipoprotein receptor OS=Homo sapiens OX=9606 GN=LSR PE=1 SV=4	Q86X29 (+4)	LSR	71 kDa	1.9899	1.4604	1.36257
Chromosome 20 open reading frame 129 OS=Homo sapiens OX=9606 GN=FAM83D PE=1 SV=1	A0A087WXK8 (+2)	FAM83D	68 kDa	1.9899	1.4604	1.36257
IST1 homolog (Fragment) OS=Homo sapiens OX=9606 GN=IST1 PE=1 SV=1	H3BMU1 (+6)	IST1	23 kDa	1.9899	1.4604	1.36257
F-actin-uncapping protein LRRC16A (Fragment) OS=Homo sapiens OX=9606 GN=CARMIL1 PE=1 SV=1	A0A0U1RQQ1 (+2)	CARMIL1	103 kDa	1.9899	1.4604	1.36257
Nucleolar protein 9 OS=Homo sapiens OX=9606 GN=NOP9 PE=1 SV=1	Q86U38	NOP9	69 kDa	1.9899	1.4604	1.36257
Gamma-glutamyl hydrolase OS=Homo sapiens OX=9606 GN=GGH PE=4 SV=1	A0A7I2YQQ3 (+1)	GGH	32 kDa	1.9899	1.4604	1.36257
Polypeptide N-acetylgalactosaminyltransferase 2 OS=Homo sapiens OX=9606 GN=GALNT2 PE=1 SV=1	Q10471	GALNT2	65 kDa	1.9899	1.4604	1.36257
Aspartyl aminopeptidase OS=Homo sapiens OX=9606 GN=DNPEP PE=1 SV=1	E5RIA4 (+3)	DNPEP	52 kDa	1.9899	1.4604	1.36257
Sideroflexin-1 OS=Homo sapiens OX=9606 GN=SFXN1 PE=1 SV=4	Q9H9B4	SFXN1	36 kDa	1.9899	1.4604	1.36257
Pentatricopeptide repeat domain-containing protein 3, mitochondrial OS=Homo sapiens OX=9606 GN=PTCD3 PE=1 SV=3	Q96EY7	PTCD3	79 kDa	1.9899	1.4604	1.36257
Lysosomal protective protein OS=Homo sapiens OX=9606 GN=CTSA PE=4 SV=1	A0A7I2V4K5 (+4)	CTSA	51 kDa	1.9899	1.4604	1.36257
SAP domain-containing ribonucleoprotein OS=Homo sapiens OX=9606 GN=SARNP PE=1 SV=1	F8VZQ9 (+2)	SARNP	24 kDa	1.9899	1.4604	1.36257
39S ribosomal protein L15, mitochondrial OS=Homo sapiens OX=9606 GN=MRPL15 PE=1 SV=1	Q9P015	MRPL15	33 kDa	1.9899	1.4604	1.36257
Condensin complex subunit 2 (Fragment) OS=Homo sapiens OX=9606 GN=NCAPH PE=1 SV=8	C9J470 (+3)	NCAPH	68 kDa	1.9899	1.4604	1.36257
Endonuclease domain-containing 1 protein OS=Homo sapiens OX=9606 GN=ENDOD1 PE=1 SV=2	O94919	ENDOD1	55 kDa	1.9899	1.4604	1.36257
ER membrane protein complex subunit 3 OS=Homo sapiens OX=9606 GN=EMC3 PE=1 SV=3	Q9P0I2 (+1)	EMC3	30 kDa	1.9899	1.4604	1.36257
Protein LSM14 homolog A (Fragment) OS=Homo sapiens OX=9606 GN=LSM14A PE=1 SV=1	A0A140TA76 (+3)	LSM14A	38 kDa	1.9899	1.4604	1.36257
RRP15-like protein OS=Homo sapiens OX=9606 GN=RRP15 PE=1 SV=2	Q9Y3B9	RRP15	31 kDa	1.9899	1.4604	1.36257
Serine/threonine-protein kinase PRP4 homolog OS=Homo sapiens OX=9606 GN=PRPF4B PE=1 SV=3	Q13523	PRPF4B	117 kDa	1.9899	1.4604	1.36257
Tricarboxylate transport protein, mitochondrial OS=Homo sapiens OX=9606 GN=SLC25A1 PE=1 SV=2	P53007	SLC25A1	34 kDa	1.9899	1.4604	1.36257
Transmembrane 9 superfamily member 2 OS=Homo sapiens OX=9606 GN=TM9SF2 PE=1 SV=1	Q99805	TM9SF2	76 kDa	1.9899	1.4604	1.36257
Cullin-4A OS=Homo sapiens OX=9606 GN=CUL4A PE=1 SV=1	A0A0A0MR50 (+2)	CUL4A	78 kDa	1.9899	1.4604	1.36257
60S ribosomal protein L22 (Fragment) OS=Homo sapiens OX=9606 GN=RPL22 PE=1 SV=1	K7EJT5 (+6)	RPL22	5 kDa	1.9899	1.4604	1.36257
GPI transamidase component PIG-S OS=Homo sapiens OX=9606 GN=PIGS PE=1 SV=3	Q96S52 (+1)	PIGS	62 kDa	1.9899	1.4604	1.36257
DNA polymerase delta subunit 2 OS=Homo sapiens OX=9606 GN=POLD2 PE=1 SV=1	A0A087WWF6 (+3)	POLD2	55 kDa	1.9899	1.4604	1.36257
Transmembrane protein 33 (Fragment) OS=Homo sapiens OX=9606 GN=TMEM33 PE=1 SV=1	D6RAA6 (+1)	TMEM33	25 kDa	1.9899	1.4604	1.36257
Methylosome protein 50 OS=Homo sapiens OX=9606 GN=WDR77 PE=1 SV=1	Q9BQA1 (+1)	WDR77	37 kDa	1.9899	1.4604	1.36257
Kinesin-like protein KIFC1 OS=Homo sapiens OX=9606 GN=KIFC1 PE=1 SV=2	Q9BW19	KIFC1	74 kDa	1.9899	1.4604	1.36257
Growth factor receptor-bound protein 7 OS=Homo sapiens OX=9606 GN=GRB7 PE=1 SV=2	Q14451 (+1)	GRB7	60 kDa	1.9899	1.4604	1.36257
WD repeat-containing protein 18 (Fragment) OS=Homo sapiens OX=9606 GN=WDR18 PE=1 SV=1	A0A0A0MQU0 (+3)	WDR18	47 kDa	1.9899	1.4604	1.36257
Ubiquitin-associated domain-containing protein 2 OS=Homo sapiens OX=9606 GN=UBAC2 PE=1 SV=1	Q8NBM4 (+1)	UBAC2	39 kDa	1.9899	1.4604	1.36257
Perilipin-3 (Fragment) OS=Homo sapiens OX=9606 GN=PLIN3 PE=1 SV=8	K7EL96 (+3)	PLIN3	18 kDa	1.9899	1.4604	1.36257
RNA-binding motif, single-stranded-interacting protein 1 OS=Homo sapiens OX=9606 GN=RBMS1 PE=1 SV=1	E7ETU5 (+3)	RBMS1	40 kDa	1.9899	1.4604	1.36257
Cadherin-related family member 5 OS=Homo sapiens OX=9606 GN=CDHR5 PE=1 SV=1	A0A0G2JMW3 (+2)	CDHR5	88 kDa	1.9899	1.4604	1.36257
BCL2L2-PABPN1 readthrough OS=Homo sapiens OX=9606 GN=BCL2L2-PABPN1 PE=4 SV=1	A0A7I2V383 (+5)	BCL2L2-PABPN1	41 kDa	1.9899	1.4604	1.36257
N-alpha-acetyltransferase 25, NatB auxiliary subunit OS=Homo sapiens OX=9606 GN=NAA25 PE=1 SV=1	Q14CX7	NAA25	112 kDa	1.9899	1.4604	1.36257
Endonuclease III-like protein 1 OS=Homo sapiens OX=9606 GN=NTHL1 PE=1 SV=2	P78549	NTHL1	34 kDa	1.9899	1.4604	1.36257
Protein SMG9 OS=Homo sapiens OX=9606 GN=SMG9 PE=1 SV=1	Q9H0W8 (+1)	SMG9	58 kDa	1.9899	1.4604	1.36257
Glypican-3 OS=Homo sapiens OX=9606 GN=GPC3 PE=1 SV=1	P51654 (+2)	GPC3	66 kDa	1.9899	1.4604	1.36257
Cytochrome b-245 light chain OS=Homo sapiens OX=9606 GN=CYBA PE=1 SV=3	P13498	CYBA	21 kDa	1.9899	1.4604	1.36257
26S proteasome non-ATPase regulatory subunit 14 OS=Homo sapiens OX=9606 GN=PSMD14 PE=1 SV=1	O00487	PSMD14	35 kDa	1.9899	1.4604	1.36257
Zinc finger matrin-type protein 2 OS=Homo sapiens OX=9606 GN=ZMAT2 PE=1 SV=1	Q96NC0	ZMAT2	24 kDa	1.9899	1.4604	1.36257
Brain-specific angiogenesis inhibitor 1-associated protein 2-like protein 1 OS=Homo sapiens OX=9606 GN=BAIAP2L1 PE=1 SV=2	Q9UHR4	BAIAP2L1	57 kDa	1.9899	1.4604	1.36257
Tight junction protein ZO-3 OS=Homo sapiens OX=9606 GN=TJP3 PE=1 SV=3	O95049 (+3)	TJP3	101 kDa	1.9899	1.4604	1.36257
Intercellular adhesion molecule 1 OS=Homo sapiens OX=9606 GN=ICAM1 PE=1 SV=2	P05362	ICAM1	58 kDa	1.9899	1.4604	1.36257
Microfibrillar-associated protein 1 OS=Homo sapiens OX=9606 GN=MFAP1 PE=1 SV=2	P55081	MFAP1	52 kDa	1.9899	1.4604	1.36257
RNA-binding protein with serine-rich domain 1 (Fragment) OS=Homo sapiens OX=9606 GN=RNPS1 PE=1 SV=1	H3BMM9 (+6)	RNPS1	32 kDa	1.9899	1.4604	1.36257
Pre-mRNA-splicing factor 38B OS=Homo sapiens OX=9606 GN=PRPF38B PE=1 SV=1	Q5VTL8 (+1)	PRPF38B	64 kDa	1.9899	1.4604	1.36257
Microtubule-associated tumor suppressor 1 OS=Homo sapiens OX=9606 GN=MTUS1 PE=1 SV=2	Q9ULD2 (+1)	MTUS1	141 kDa	1.9899	1.4604	1.36257
Angio-associated migratory cell protein OS=Homo sapiens OX=9606 GN=AAMP PE=1 SV=1	C9JEH3 (+2)	AAMP	47 kDa	1.9899	1.4604	1.36257
Actin-histidine N-methyltransferase OS=Homo sapiens OX=9606 GN=SETD3 PE=1 SV=1	Q86TU7	SETD3	67 kDa	1.9899	1.4604	1.36257
Protein SOGA1 (Fragment) OS=Homo sapiens OX=9606 GN=SOGA1 PE=1 SV=1	H0YDM2 (+2)	SOGA1	142 kDa	1.9899	1.4604	1.36257
Inverted formin-2 OS=Homo sapiens OX=9606 GN=INF2 PE=1 SV=1	A0A6Q8PGN3 (+5)	INF2	135 kDa	1.9899	1.4604	1.36257
A-kinase anchor protein 13 OS=Homo sapiens OX=9606 GN=AKAP13 PE=1 SV=2	Q12802 (+2)	AKAP13	308 kDa	1.9899	1.4604	1.36257
Exportin-5 OS=Homo sapiens OX=9606 GN=XPO5 PE=1 SV=1	Q9HAV4	XPO5	136 kDa	1.9899	1.4604	1.36257
Peptidylprolyl isomerase OS=Homo sapiens OX=9606 GN=FKBP11 PE=1 SV=1	F8VU90 (+2)	FKBP11	20 kDa	1.9899	1.4604	1.36257
Protein kinase C iota type OS=Homo sapiens OX=9606 GN=PRKCI PE=1 SV=2	P41743	PRKCI	68 kDa	1.9899	1.4604	1.36257
C-Jun-amino-terminal kinase-interacting protein 4 OS=Homo sapiens OX=9606 GN=SPAG9 PE=1 SV=1	A0A087X2D8 (+6)	SPAG9	145 kDa	1.9899	1.4604	1.36257
Chromosome-associated kinesin KIF4A OS=Homo sapiens OX=9606 GN=KIF4A PE=1 SV=3	O95239	KIF4A	140 kDa	1.9899	1.4604	1.36257
Alpha-methylacyl-CoA racemase OS=Homo sapiens OX=9606 GN=AMACR PE=1 SV=1	D6RB81 (+4)	AMACR	41 kDa	1.9899	1.4604	1.36257
Transcription activator BRG1 (Fragment) OS=Homo sapiens OX=9606 GN=SMARCA4 PE=1 SV=1	A0A2R8YGG3	SMARCA4	165 kDa	1.9899	1.4604	1.36257
Thioredoxin-disulfide reductase OS=Homo sapiens OX=9606 GN=TXNRD1 PE=1 SV=1	A0A087WSW9 (+11)	TXNRD1	60 kDa	1.9899	1.4604	1.36257
Serine/arginine-rich splicing factor 11 OS=Homo sapiens OX=9606 GN=SRSF11 PE=1 SV=1	Q05519 (+1)	SRSF11	54 kDa	1.9899	1.4604	1.36257
FACT complex subunit SPT16 OS=Homo sapiens OX=9606 GN=SUPT16H PE=1 SV=1	Q9Y5B9	SUPT16H	120 kDa	13.929	10.223	1.36252
Catenin delta-1 OS=Homo sapiens OX=9606 GN=CTNND1 PE=1 SV=1	A0A669KB05 (+2)	CTNND1	102 kDa	13.929	10.223	1.36252
DNA replication licensing factor MCM4 OS=Homo sapiens OX=9606 GN=MCM4 PE=1 SV=5	P33991	MCM4	97 kDa	16.582	12.413	1.33586
Filamin-C OS=Homo sapiens OX=9606 GN=FLNC PE=1 SV=3	Q14315 (+1)	FLNC	291 kDa	14.592	10.953	1.33224
E3 ubiquitin-protein ligase RNF213 OS=Homo sapiens OX=9606 GN=RNF213 PE=1 SV=1	A0A0A0MTC1 (+1)	RNF213	596 kDa	10.613	8.0321	1.32132
Isoform 5 of AP-3 complex subunit delta-1 OS=Homo sapiens OX=9606 GN=AP3D1	O14617-5	AP3D1	137 kDa	10.613	8.0321	1.32132
Unconventional myosin-Id OS=Homo sapiens OX=9606 GN=MYO1D PE=1 SV=2	O94832	MYO1D	116 kDa	21.225	16.064	1.32128
Ankyrin repeat and KH domain-containing protein 1 OS=Homo sapiens OX=9606 GN=ANKHD1 PE=1 SV=1	Q8IWZ3 (+2)	ANKHD1	269 kDa	17.246	13.143	1.31218
Isoform 2 of Band 4.1-like protein 1 OS=Homo sapiens OX=9606 GN=EPB41L1	Q9H4G0-2	EPB41L1	88 kDa	8.6228	6.5717	1.31211
Plastin-3 OS=Homo sapiens OX=9606 GN=PLS3 PE=1 SV=1	A0A0A0MSQ0 (+3)	PLS3	69 kDa	8.6228	6.5717	1.31211
Lon protease homolog, mitochondrial OS=Homo sapiens OX=9606 GN=LONP1 PE=1 SV=1	K7EJE8 (+3)	LONP1	93 kDa	8.6228	6.5717	1.31211
AP-1 complex subunit beta-1 OS=Homo sapiens OX=9606 GN=AP1B1 PE=1 SV=2	Q10567 (+3)	AP1B1	105 kDa	8.6228	6.5717	1.31211
Sodium/potassium-transporting ATPase subunit alpha-1 OS=Homo sapiens OX=9606 GN=ATP1A1 PE=1 SV=1	P05023 (+1)	ATP1A1	113 kDa	19.899	15.334	1.2977
Talin-2 OS=Homo sapiens OX=9606 GN=TLN2 PE=1 SV=4	Q9Y4G6	TLN2	272 kDa	6.6329	5.1113	1.29769
GTP-binding protein 1 OS=Homo sapiens OX=9606 GN=GTPBP1 PE=1 SV=3	O00178	GTPBP1	72 kDa	6.6329	5.1113	1.29769
AP-3 complex subunit beta-1 OS=Homo sapiens OX=9606 GN=AP3B1 PE=1 SV=3	O00203 (+1)	AP3B1	121 kDa	6.6329	5.1113	1.29769
Dolichyl-diphosphooligosaccharide--protein glycosyltransferase subunit STT3A OS=Homo sapiens OX=9606 GN=STT3A PE=1 SV=2	P46977	STT3A	81 kDa	6.6329	5.1113	1.29769
Condensin complex subunit 1 OS=Homo sapiens OX=9606 GN=NCAPD2 PE=1 SV=3	Q15021	NCAPD2	157 kDa	6.6329	5.1113	1.29769
Cytoplasmic dynein 1 light intermediate chain 1 OS=Homo sapiens OX=9606 GN=DYNC1LI1 PE=1 SV=3	Q9Y6G9	DYNC1LI1	57 kDa	6.6329	5.1113	1.29769
Zinc finger CCHC domain-containing protein 3 OS=Homo sapiens OX=9606 GN=ZCCHC3 PE=1 SV=2	Q9NUD5	ZCCHC3	44 kDa	6.6329	5.1113	1.29769
Coatomer subunit delta OS=Homo sapiens OX=9606 GN=ARCN1 PE=1 SV=1	P48444	ARCN1	57 kDa	13.266	10.223	1.29766
Myosin-14 OS=Homo sapiens OX=9606 GN=MYH14 PE=1 SV=2	Q7Z406 (+1)	MYH14	228 kDa	13.266	10.223	1.29766
Cold shock domain-containing protein E1 OS=Homo sapiens OX=9606 GN=CSDE1 PE=1 SV=2	O75534 (+1)	CSDE1	89 kDa	17.909	13.874	1.29083
Sarcoplasmic/endoplasmic reticulum calcium ATPase 2 OS=Homo sapiens OX=9606 GN=ATP2A2 PE=1 SV=1	P16615 (+3)	ATP2A2	115 kDa	11.276	8.7622	1.28689
Endoplasmin OS=Homo sapiens OX=9606 GN=HSP90B1 PE=1 SV=1	P14625	HSP90B1	92 kDa	15.919	12.413	1.28245
Histone H1.10 OS=Homo sapiens OX=9606 GN=H1-10 PE=1 SV=1	Q92522	H1-10	22 kDa	4.643	3.6509	1.27174
Heterogeneous nuclear ribonucleoprotein D-like OS=Homo sapiens OX=9606 GN=HNRNPDL PE=1 SV=1	A0A087WUK2 (+1)	HNRNPDL	40 kDa	4.643	3.6509	1.27174
Nuclear export mediator factor NEMF OS=Homo sapiens OX=9606 GN=NEMF PE=1 SV=4	O60524 (+3)	NEMF	123 kDa	4.643	3.6509	1.27174
Ras-related protein Rab-10 OS=Homo sapiens OX=9606 GN=RAB10 PE=1 SV=1	P61026	RAB10	23 kDa	4.643	3.6509	1.27174
Mitotic checkpoint protein BUB3 (Fragment) OS=Homo sapiens OX=9606 GN=BUB3 PE=1 SV=1	J3QT28 (+2)	BUB3	32 kDa	4.643	3.6509	1.27174
CCR4-NOT transcription complex subunit 3 OS=Homo sapiens OX=9606 GN=CNOT3 PE=1 SV=1	O75175	CNOT3	82 kDa	4.643	3.6509	1.27174
2,4-dienoyl-CoA reductase [(3E)-enoyl-CoA-producing], mitochondrial OS=Homo sapiens OX=9606 GN=DECR1 PE=1 SV=1	Q16698 (+1)	DECR1	36 kDa	4.643	3.6509	1.27174
MKI67 FHA domain-interacting nucleolar phosphoprotein OS=Homo sapiens OX=9606 GN=NIFK PE=1 SV=1	Q9BYG3	NIFK	34 kDa	4.643	3.6509	1.27174
Thioredoxin-related transmembrane protein 2 OS=Homo sapiens OX=9606 GN=TMX2 PE=1 SV=1	Q9Y320 (+1)	TMX2	34 kDa	4.643	3.6509	1.27174
RNA-binding protein 8A OS=Homo sapiens OX=9606 GN=RBM8A PE=1 SV=1	Q9Y5S9	RBM8A	20 kDa	4.643	3.6509	1.27174
N-alpha-acetyltransferase 50 OS=Homo sapiens OX=9606 GN=NAA50 PE=1 SV=1	C9J5D1 (+2)	NAA50	15 kDa	4.643	3.6509	1.27174
Thioredoxin domain-containing protein 5 OS=Homo sapiens OX=9606 GN=TXNDC5 PE=1 SV=2	Q8NBS9 (+1)	TXNDC5	48 kDa	4.643	3.6509	1.27174
Deoxynucleoside triphosphate triphosphohydrolase SAMHD1 OS=Homo sapiens OX=9606 GN=SAMHD1 PE=1 SV=1	A0A2R8YCS7 (+2)	SAMHD1	68 kDa	4.643	3.6509	1.27174
Protein kinase C and casein kinase substrate in neurons protein 2 OS=Homo sapiens OX=9606 GN=PACSIN2 PE=1 SV=2	Q9UNF0 (+1)	PACSIN2	56 kDa	4.643	3.6509	1.27174
Isoform 2 of Vesicle-fusing ATPase OS=Homo sapiens OX=9606 GN=NSF	P46459-2	NSF	72 kDa	4.643	3.6509	1.27174
60S ribosomal protein L34 OS=Homo sapiens OX=9606 GN=RPL34 PE=1 SV=3	P49207	RPL34	13 kDa	9.2861	7.3019	1.27174
Clustered mitochondria protein homolog OS=Homo sapiens OX=9606 GN=CLUH PE=1 SV=1	A0A494C0R8	CLUH	150 kDa	21.225	16.794	1.26384
Aspartate--tRNA ligase, mitochondrial OS=Homo sapiens OX=9606 GN=DARS2 PE=1 SV=1	Q6PI48	DARS2	74 kDa	11.939	9.4924	1.25774
Isoform 3 of Heterogeneous nuclear ribonucleoprotein K OS=Homo sapiens OX=9606 GN=HNRNPK	P61978-3	HNRNPK	49 kDa	19.235	15.334	1.2544
Keratin, type II cytoskeletal 78 OS=Homo sapiens OX=9606 GN=KRT78 PE=1 SV=2	Q8N1N4	KRT78	57 kDa	7.2962	5.8415	1.24903
Serine/arginine-rich splicing factor 7 OS=Homo sapiens OX=9606 GN=SRSF7 PE=1 SV=1	Q16629 (+1)	SRSF7	27 kDa	7.2962	5.8415	1.24903
Myocardin-related transcription factor B OS=Homo sapiens OX=9606 GN=MRTFB PE=1 SV=3	Q9ULH7 (+2)	MRTFB	118 kDa	7.2962	5.8415	1.24903
Alpha-actinin-1 OS=Homo sapiens OX=9606 GN=ACTN1 PE=4 SV=1	A0A7I2V4Y4 (+5)	ACTN1	104 kDa	7.2962	5.8415	1.24903
26S proteasome non-ATPase regulatory subunit 11 OS=Homo sapiens OX=9606 GN=PSMD11 PE=1 SV=3	O00231 (+1)	PSMD11	47 kDa	7.2962	5.8415	1.24903
Eukaryotic translation initiation factor 3 subunit F OS=Homo sapiens OX=9606 GN=EIF3F PE=1 SV=2	H0YDT6 (+1)	EIF3F	38 kDa	14.592	11.683	1.24899
Neuroblast differentiation-associated protein AHNAK OS=Homo sapiens OX=9606 GN=AHNAK PE=1 SV=2	Q09666	AHNAK	629 kDa	49.084	39.43	1.24484
Alpha-taxilin OS=Homo sapiens OX=9606 GN=TXLNA PE=1 SV=3	P40222	TXLNA	62 kDa	9.9494	8.0321	1.2387
Zinc finger CCCH domain-containing protein 15 OS=Homo sapiens OX=9606 GN=ZC3H15 PE=1 SV=1	Q8WU90	ZC3H15	49 kDa	9.9494	8.0321	1.2387
Cytoplasmic FMR1-interacting protein 1 OS=Homo sapiens OX=9606 GN=CYFIP1 PE=1 SV=1	Q7L576	CYFIP1	145 kDa	9.9494	8.0321	1.2387
Non-POU domain-containing octamer-binding protein OS=Homo sapiens OX=9606 GN=NONO PE=4 SV=1	A0A7I2V535	NONO	58 kDa	10.613	8.7622	1.21123
60S ribosomal protein L27 OS=Homo sapiens OX=9606 GN=RPL27 PE=1 SV=2	P61353	RPL27	16 kDa	10.613	8.7622	1.21123
Eukaryotic peptide chain release factor subunit 1 OS=Homo sapiens OX=9606 GN=ETF1 PE=1 SV=1	B7Z7P8 (+2)	ETF1	47 kDa	10.613	8.7622	1.21123
Transportin-1 OS=Homo sapiens OX=9606 GN=TNPO1 PE=1 SV=2	Q92973 (+1)	TNPO1	102 kDa	10.613	8.7622	1.21123
Tubulin beta-6 chain OS=Homo sapiens OX=9606 GN=TUBB6 PE=1 SV=1	Q9BUF5	TUBB6	50 kDa	10.613	8.7622	1.21123
Myosin-10 OS=Homo sapiens OX=9606 GN=MYH10 PE=1 SV=3	P35580 (+4)	MYH10	229 kDa	15.919	13.143	1.21122
Glycogen phosphorylase, liver form OS=Homo sapiens OX=9606 GN=PYGL PE=1 SV=4	P06737 (+1)	PYGL	97 kDa	5.3063	4.3811	1.21118
Pescadillo homolog OS=Homo sapiens OX=9606 GN=PES1 PE=1 SV=1	B5MCF9 (+2)	PES1	66 kDa	5.3063	4.3811	1.21118
U4/U6.U5 tri-snRNP-associated protein 1 OS=Homo sapiens OX=9606 GN=SART1 PE=1 SV=1	O43290	SART1	90 kDa	5.3063	4.3811	1.21118
Aldehyde dehydrogenase X, mitochondrial OS=Homo sapiens OX=9606 GN=ALDH1B1 PE=1 SV=3	P30837	ALDH1B1	57 kDa	5.3063	4.3811	1.21118
V-type proton ATPase catalytic subunit A OS=Homo sapiens OX=9606 GN=ATP6V1A PE=1 SV=2	P38606 (+1)	ATP6V1A	68 kDa	5.3063	4.3811	1.21118
E3 ubiquitin-protein ligase TRIM21 OS=Homo sapiens OX=9606 GN=TRIM21 PE=1 SV=1	P19474 (+1)	TRIM21	54 kDa	5.3063	4.3811	1.21118
Platelet-activating factor acetylhydrolase IB subunit alpha OS=Homo sapiens OX=9606 GN=PAFAH1B1 PE=1 SV=1	A0A6Q8PFU3 (+1)	PAFAH1B1	49 kDa	5.3063	4.3811	1.21118
Citrate synthase OS=Homo sapiens OX=9606 GN=CS PE=1 SV=1	B4DJV2 (+1)	CS	50 kDa	5.3063	4.3811	1.21118
Flotillin OS=Homo sapiens OX=9606 GN=FLOT2 PE=1 SV=1	E7EMK3 (+2)	FLOT2	53 kDa	5.3063	4.3811	1.21118
Pyrroline-5-carboxylate reductase 1, mitochondrial OS=Homo sapiens OX=9606 GN=PYCR1 PE=1 SV=2	P32322 (+2)	PYCR1	33 kDa	5.3063	4.3811	1.21118
LLGL scribble cell polarity complex component 2 OS=Homo sapiens OX=9606 GN=LLGL2 PE=1 SV=1	J3QRV5 (+2)	LLGL2	113 kDa	5.3063	4.3811	1.21118
AFG3-like protein 2 OS=Homo sapiens OX=9606 GN=AFG3L2 PE=1 SV=2	Q9Y4W6	AFG3L2	89 kDa	5.3063	4.3811	1.21118
Flotillin-1 OS=Homo sapiens OX=9606 GN=FLOT1 PE=1 SV=3	O75955	FLOT1	47 kDa	7.9595	6.5717	1.21118
Exportin-2 OS=Homo sapiens OX=9606 GN=CSE1L PE=1 SV=3	P55060 (+1)	CSE1L	110 kDa	7.9595	6.5717	1.21118
Dihydropyrimidinase-related protein 2 OS=Homo sapiens OX=9606 GN=DPYSL2 PE=1 SV=1	A0A1C7CYX9 (+2)	DPYSL2	74 kDa	7.9595	6.5717	1.21118
General transcription factor 3C polypeptide 3 OS=Homo sapiens OX=9606 GN=GTF3C3 PE=1 SV=1	Q9Y5Q9	GTF3C3	101 kDa	7.9595	6.5717	1.21118
Serine/arginine-rich splicing factor 9 OS=Homo sapiens OX=9606 GN=SRSF9 PE=1 SV=1	Q13242	SRSF9	26 kDa	7.9595	6.5717	1.21118
Methionine aminopeptidase 2 OS=Homo sapiens OX=9606 GN=METAP2 PE=1 SV=1	F8VQZ7	METAP2	53 kDa	7.9595	6.5717	1.21118
SWI/SNF-related matrix-associated actin-dependent regulator of chromatin subfamily A member 5 OS=Homo sapiens OX=9606 GN=SMARCA5 PE=1 SV=1	O60264	SMARCA5	122 kDa	7.9595	6.5717	1.21118
RNA-binding protein NOB1 OS=Homo sapiens OX=9606 GN=NOB1 PE=1 SV=1	Q9ULX3	NOB1	47 kDa	7.9595	6.5717	1.21118
Isoform 5 of Rho GTPase-activating protein 17 OS=Homo sapiens OX=9606 GN=ARHGAP17	Q68EM7-5	ARHGAP17	94 kDa	2.6532	2.1906	1.21118
Dihydrolipoyllysine-residue acetyltransferase component of pyruvate dehydrogenase complex, mitochondrial OS=Homo sapiens OX=9606 GN=DLAT PE=1 SV=3	P10515	DLAT	69 kDa	2.6532	2.1906	1.21118
Exosome complex component RRP46 OS=Homo sapiens OX=9606 GN=EXOSC5 PE=1 SV=1	Q9NQT4	EXOSC5	25 kDa	2.6532	2.1906	1.21118
Casein kinase II subunit beta OS=Homo sapiens OX=9606 GN=CSNK2B PE=4 SV=1	A0A7I2YQ78 (+3)	CSNK2B	27 kDa	2.6532	2.1906	1.21118
MAP/microtubule affinity-regulating kinase 3 OS=Homo sapiens OX=9606 GN=MARK3 PE=4 SV=1	A0A7I2V2E3 (+24)	MARK3	70 kDa	2.6532	2.1906	1.21118
Transcription elongation regulator 1 OS=Homo sapiens OX=9606 GN=TCERG1 PE=1 SV=2	O14776 (+1)	TCERG1	124 kDa	2.6532	2.1906	1.21118
F-actin monooxygenase OS=Homo sapiens OX=9606 GN=MICAL2 PE=1 SV=1	A0A2R8YFA9	MICAL2	219 kDa	2.6532	2.1906	1.21118
Protein transport protein Sec61 subunit alpha isoform 1 OS=Homo sapiens OX=9606 GN=SEC61A1 PE=1 SV=1	B4DR61 (+1)	SEC61A1	53 kDa	2.6532	2.1906	1.21118
Myogenesis-regulating glycosidase OS=Homo sapiens OX=9606 GN=MYORG PE=1 SV=2	Q6NSJ0	MYORG	81 kDa	2.6532	2.1906	1.21118
Ribosomal_L2_C domain-containing protein (Fragment) OS=Homo sapiens OX=9606 PE=4 SV=1	A0A669KAX9 (+1)		26 kDa	2.6532	2.1906	1.21118
Calumenin OS=Homo sapiens OX=9606 GN=CALU PE=1 SV=2	O43852 (+1)	CALU	37 kDa	2.6532	2.1906	1.21118
Ras-related protein Rab-14 OS=Homo sapiens OX=9606 GN=RAB14 PE=1 SV=4	P61106	RAB14	24 kDa	2.6532	2.1906	1.21118
Isoform 3 of Glutaminase kidney isoform, mitochondrial OS=Homo sapiens OX=9606 GN=GLS	O94925-3	GLS	65 kDa	2.6532	2.1906	1.21118
Lysophospholipid acyltransferase 5 OS=Homo sapiens OX=9606 GN=LPCAT3 PE=1 SV=1	Q6P1A2	LPCAT3	56 kDa	2.6532	2.1906	1.21118
ATP synthase subunit g, mitochondrial OS=Homo sapiens OX=9606 GN=ATP5MG PE=1 SV=3	O75964	ATP5MG	11 kDa	2.6532	2.1906	1.21118
3-hydroxyisobutyryl-CoA hydrolase, mitochondrial OS=Homo sapiens OX=9606 GN=HIBCH PE=1 SV=2	Q6NVY1	HIBCH	43 kDa	2.6532	2.1906	1.21118
Endoplasmic reticulum protein SC65 OS=Homo sapiens OX=9606 GN=P3H4 PE=1 SV=1	Q92791	P3H4	50 kDa	2.6532	2.1906	1.21118
General vesicular transport factor p115 OS=Homo sapiens OX=9606 GN=USO1 PE=1 SV=2	O60763 (+1)	USO1	108 kDa	2.6532	2.1906	1.21118
39S ribosomal protein L38, mitochondrial OS=Homo sapiens OX=9606 GN=MRPL38 PE=1 SV=2	Q96DV4	MRPL38	45 kDa	2.6532	2.1906	1.21118
UPF0488 protein C8orf33 OS=Homo sapiens OX=9606 GN=C8orf33 PE=1 SV=1	A0A3B3IRR6 (+4)	C8orf33	24 kDa	2.6532	2.1906	1.21118
26S proteasome non-ATPase regulatory subunit 2 OS=Homo sapiens OX=9606 GN=PSMD2 PE=1 SV=3	Q13200	PSMD2	100 kDa	2.6532	2.1906	1.21118
MAGUK p55 subfamily member 7 OS=Homo sapiens OX=9606 GN=MPP7 PE=1 SV=1	Q5T2T1	MPP7	66 kDa	2.6532	2.1906	1.21118
Ribonuclease inhibitor OS=Homo sapiens OX=9606 GN=RNH1 PE=1 SV=2	P13489	RNH1	50 kDa	2.6532	2.1906	1.21118
COP9 signalosome complex subunit 2 OS=Homo sapiens OX=9606 GN=COPS2 PE=1 SV=1	B4DIH5 (+2)	COPS2	44 kDa	2.6532	2.1906	1.21118
Transforming acidic coiled-coil-containing protein 1 OS=Homo sapiens OX=9606 GN=TACC1 PE=1 SV=1	E7ET87 (+6)	TACC1	67 kDa	2.6532	2.1906	1.21118
Dehydrogenase/reductase SDR family member 7B OS=Homo sapiens OX=9606 GN=DHRS7B PE=1 SV=1	A0A0C4DGQ8 (+1)	DHRS7B	34 kDa	2.6532	2.1906	1.21118
Cytochrome c1, heme protein, mitochondrial OS=Homo sapiens OX=9606 GN=CYC1 PE=1 SV=3	P08574	CYC1	35 kDa	2.6532	2.1906	1.21118
Plakophilin-3 OS=Homo sapiens OX=9606 GN=PKP3 PE=1 SV=1	Q9Y446 (+1)	PKP3	87 kDa	2.6532	2.1906	1.21118
26S proteasome non-ATPase regulatory subunit 13 OS=Homo sapiens OX=9606 GN=PSMD13 PE=1 SV=2	Q9UNM6 (+1)	PSMD13	43 kDa	2.6532	2.1906	1.21118
Lanosterol 14-alpha demethylase OS=Homo sapiens OX=9606 GN=CYP51A1 PE=1 SV=1	A0A0C4DFL7 (+1)	CYP51A1	57 kDa	2.6532	2.1906	1.21118
Ras-related protein Rab-6A OS=Homo sapiens OX=9606 GN=RAB6A PE=1 SV=3	P20340 (+1)	RAB6A	24 kDa	2.6532	2.1906	1.21118
U2 small nuclear ribonucleoprotein B'' OS=Homo sapiens OX=9606 GN=SNRPB2 PE=1 SV=1	P08579	SNRPB2	25 kDa	2.6532	2.1906	1.21118
Isoform 2 of Band 4.1-like protein 5 OS=Homo sapiens OX=9606 GN=EPB41L5	Q9HCM4-2	EPB41L5	58 kDa	2.6532	2.1906	1.21118
Calcium-activated neutral proteinase small subunit (Fragment) OS=Homo sapiens OX=9606 GN=CAPNS1 PE=1 SV=1	A0A075B7C0 (+4)	CAPNS1	22 kDa	2.6532	2.1906	1.21118
Transcription initiation factor IIE subunit beta OS=Homo sapiens OX=9606 GN=GTF2E2 PE=1 SV=1	P29084	GTF2E2	33 kDa	2.6532	2.1906	1.21118
39S ribosomal protein L39, mitochondrial (Fragment) OS=Homo sapiens OX=9606 GN=MRPL39 PE=1 SV=1	C9JG87 (+2)	MRPL39	34 kDa	2.6532	2.1906	1.21118
Protein LSM12 homolog OS=Homo sapiens OX=9606 GN=LSM12 PE=1 SV=2	Q3MHD2 (+1)	LSM12	22 kDa	2.6532	2.1906	1.21118
AP-3 complex subunit mu-1 OS=Homo sapiens OX=9606 GN=AP3M1 PE=1 SV=1	Q9Y2T2	AP3M1	47 kDa	2.6532	2.1906	1.21118
GPI transamidase component PIG-T (Fragment) OS=Homo sapiens OX=9606 GN=PIGT PE=1 SV=1	A0A1W2PNP0 (+7)	PIGT	66 kDa	2.6532	2.1906	1.21118
Ribosome biogenesis protein BRX1 homolog OS=Homo sapiens OX=9606 GN=BRIX1 PE=1 SV=2	Q8TDN6	BRIX1	41 kDa	2.6532	2.1906	1.21118
RCC1-like G exchanging factor-like protein OS=Homo sapiens OX=9606 GN=RCC1L PE=1 SV=2	Q96I51 (+2)	RCC1L	50 kDa	2.6532	2.1906	1.21118
Mitochondrial ribonuclease P catalytic subunit OS=Homo sapiens OX=9606 GN=PRORP PE=1 SV=2	O15091 (+1)	PRORP	67 kDa	2.6532	2.1906	1.21118
Signal peptidase complex catalytic subunit SEC11 OS=Homo sapiens OX=9606 GN=SEC11A PE=1 SV=1	H0YNG3 (+3)	SEC11A	19 kDa	2.6532	2.1906	1.21118
Beta-arrestin-1 OS=Homo sapiens OX=9606 GN=ARRB1 PE=1 SV=2	P49407 (+1)	ARRB1	47 kDa	2.6532	2.1906	1.21118
DnaJ homolog subfamily A member 2 OS=Homo sapiens OX=9606 GN=DNAJA2 PE=1 SV=1	O60884	DNAJA2	46 kDa	2.6532	2.1906	1.21118
10 kDa heat shock protein, mitochondrial OS=Homo sapiens OX=9606 GN=HSPE1 PE=1 SV=1	B8ZZL8 (+1)	HSPE1	11 kDa	2.6532	2.1906	1.21118
L-xylulose reductase (Fragment) OS=Homo sapiens OX=9606 GN=DCXR PE=1 SV=8	J3KS22 (+2)	DCXR	24 kDa	2.6532	2.1906	1.21118
Saccharopine dehydrogenase-like oxidoreductase OS=Homo sapiens OX=9606 GN=SCCPDH PE=1 SV=1	Q8NBX0	SCCPDH	47 kDa	2.6532	2.1906	1.21118
tRNA (adenine(58)-N(1))-methyltransferase catalytic subunit TRMT61A OS=Homo sapiens OX=9606 GN=TRMT61A PE=1 SV=1	Q96FX7	TRMT61A	31 kDa	2.6532	2.1906	1.21118
RNA-binding protein 14 OS=Homo sapiens OX=9606 GN=RBM14 PE=1 SV=2	Q96PK6	RBM14	69 kDa	2.6532	2.1906	1.21118
Histidine--tRNA ligase OS=Homo sapiens OX=9606 GN=HARS2 PE=1 SV=1	A0A2R8Y3N3 (+6)	HARS2	53 kDa	2.6532	2.1906	1.21118
Serine/threonine-protein kinase PAK 2 OS=Homo sapiens OX=9606 GN=PAK2 PE=1 SV=3	Q13177	PAK2	58 kDa	2.6532	2.1906	1.21118
Metaxin-2 OS=Homo sapiens OX=9606 GN=MTX2 PE=1 SV=1	O75431 (+1)	MTX2	30 kDa	2.6532	2.1906	1.21118
Nicotinamide phosphoribosyltransferase OS=Homo sapiens OX=9606 GN=NAMPT PE=1 SV=1	P43490	NAMPT	56 kDa	2.6532	2.1906	1.21118
Reticulon-4 OS=Homo sapiens OX=9606 GN=RTN4 PE=1 SV=2	Q9NQC3	RTN4	130 kDa	2.6532	2.1906	1.21118
28S ribosomal protein S23, mitochondrial OS=Homo sapiens OX=9606 GN=MRPS23 PE=1 SV=2	Q9Y3D9	MRPS23	22 kDa	2.6532	2.1906	1.21118
Pre-mRNA-processing-splicing factor 8 OS=Homo sapiens OX=9606 GN=PRPF8 PE=1 SV=2	Q6P2Q9	PRPF8	274 kDa	16.582	13.874	1.19519
Septin-7 OS=Homo sapiens OX=9606 GN=SEPTIN7 PE=1 SV=2	Q16181	SEPTIN7	51 kDa	13.929	11.683	1.19225
Major vault protein OS=Homo sapiens OX=9606 GN=MVP PE=1 SV=4	Q14764	MVP	99 kDa	11.276	9.4924	1.1879
14-3-3 protein beta/alpha OS=Homo sapiens OX=9606 GN=YWHAB PE=1 SV=3	P31946 (+1)	YWHAB	28 kDa	11.276	9.4924	1.1879
Src substrate cortactin OS=Homo sapiens OX=9606 GN=CTTN PE=1 SV=2	Q14247 (+1)	CTTN	62 kDa	8.6228	7.3019	1.1809
Isoform 3 of L-lactate dehydrogenase A chain OS=Homo sapiens OX=9606 GN=LDHA	P00338-3	LDHA	40 kDa	8.6228	7.3019	1.1809
Ras-related protein Rab-1A OS=Homo sapiens OX=9606 GN=RAB1A PE=1 SV=3	P62820	RAB1A	23 kDa	8.6228	7.3019	1.1809
Uncharacterized protein C7orf50 OS=Homo sapiens OX=9606 GN=C7orf50 PE=1 SV=1	Q9BRJ6	C7orf50	22 kDa	5.9696	5.1113	1.16792
Disco-interacting protein 2 homolog B OS=Homo sapiens OX=9606 GN=DIP2B PE=1 SV=3	Q9P265	DIP2B	171 kDa	5.9696	5.1113	1.16792
Serine-threonine kinase receptor-associated protein OS=Homo sapiens OX=9606 GN=STRAP PE=1 SV=1	Q9Y3F4 (+1)	STRAP	38 kDa	5.9696	5.1113	1.16792
TBC1 domain family member 4 OS=Homo sapiens OX=9606 GN=TBC1D4 PE=1 SV=2	O60343 (+2)	TBC1D4	147 kDa	5.9696	5.1113	1.16792
Peptidyl-prolyl cis-trans isomerase FKBP4 OS=Homo sapiens OX=9606 GN=FKBP4 PE=1 SV=3	Q02790	FKBP4	52 kDa	5.9696	5.1113	1.16792
Coiled-coil domain-containing protein 6 OS=Homo sapiens OX=9606 GN=CCDC6 PE=1 SV=2	Q16204	CCDC6	53 kDa	5.9696	5.1113	1.16792
Talin-1 OS=Homo sapiens OX=9606 GN=TLN1 PE=1 SV=3	Q9Y490	TLN1	270 kDa	23.878	20.445	1.16791
ATP-dependent 6-phosphofructokinase, platelet type OS=Homo sapiens OX=9606 GN=PFKP PE=1 SV=2	Q01813	PFKP	86 kDa	11.939	10.223	1.16786
Splicing factor 3B subunit 1 OS=Homo sapiens OX=9606 GN=SF3B1 PE=1 SV=3	O75533	SF3B1	146 kDa	9.2861	8.0321	1.15612
Eukaryotic translation initiation factor 5B OS=Homo sapiens OX=9606 GN=EIF5B PE=1 SV=1	A0A087WUT6 (+1)	EIF5B	139 kDa	31.838	27.747	1.14744
Kinectin OS=Homo sapiens OX=9606 GN=KTN1 PE=1 SV=1	Q86UP2	KTN1	156 kDa	15.919	13.874	1.1474
T-complex protein 1 subunit theta OS=Homo sapiens OX=9606 GN=CCT8 PE=1 SV=4	P50990	CCT8	60 kDa	15.919	13.874	1.1474
60S ribosomal protein L6 OS=Homo sapiens OX=9606 GN=RPL6 PE=1 SV=3	Q02878	RPL6	33 kDa	25.868	22.636	1.14278
Liprin-alpha-1 (Fragment) OS=Homo sapiens OX=9606 GN=PPFIA1 PE=1 SV=1	A0A2R8Y7R9	PPFIA1	139 kDa	3.3165	2.9207	1.13552
UTP--glucose-1-phosphate uridylyltransferase OS=Homo sapiens OX=9606 GN=UGP2 PE=1 SV=5	Q16851	UGP2	57 kDa	3.3165	2.9207	1.13552
Threonine--tRNA ligase 1, cytoplasmic OS=Homo sapiens OX=9606 GN=TARS1 PE=1 SV=3	P26639 (+1)	TARS1	83 kDa	3.3165	2.9207	1.13552
Prosaposin OS=Homo sapiens OX=9606 GN=PSAP PE=1 SV=2	C9JIZ6 (+3)	PSAP	58 kDa	3.3165	2.9207	1.13552
Succinate-semialdehyde dehydrogenase OS=Homo sapiens OX=9606 GN=ALDH5A1 PE=1 SV=1	C9J8Q5 (+2)	ALDH5A1	54 kDa	3.3165	2.9207	1.13552
Protein FRG1 OS=Homo sapiens OX=9606 GN=FRG1 PE=1 SV=1	Q14331	FRG1	29 kDa	3.3165	2.9207	1.13552
DNA topoisomerase 3-beta-1 OS=Homo sapiens OX=9606 GN=TOP3B PE=1 SV=1	O95985 (+2)	TOP3B	97 kDa	3.3165	2.9207	1.13552
14-3-3 protein sigma OS=Homo sapiens OX=9606 GN=SFN PE=1 SV=1	P31947 (+1)	SFN	28 kDa	3.3165	2.9207	1.13552
Isoform 2 of Prolyl 4-hydroxylase subunit alpha-1 OS=Homo sapiens OX=9606 GN=P4HA1	P13674-2 (+1)	P4HA1	61 kDa	3.3165	2.9207	1.13552
4-hydroxyphenylpyruvate dioxygenase-like protein OS=Homo sapiens OX=9606 GN=HPDL PE=1 SV=1	Q96IR7	HPDL	39 kDa	3.3165	2.9207	1.13552
Protein FAM50A OS=Homo sapiens OX=9606 GN=FAM50A PE=1 SV=2	Q14320	FAM50A	40 kDa	3.3165	2.9207	1.13552
Actin-like protein 8 OS=Homo sapiens OX=9606 GN=ACTL8 PE=1 SV=1	Q9H568	ACTL8	41 kDa	3.3165	2.9207	1.13552
KH domain-containing, RNA-binding, signal transduction-associated protein 1 OS=Homo sapiens OX=9606 GN=KHDRBS1 PE=1 SV=1	Q07666 (+1)	KHDRBS1	48 kDa	3.3165	2.9207	1.13552
U4/U6.U5 tri-snRNP-associated protein 2 OS=Homo sapiens OX=9606 GN=USP39 PE=1 SV=1	B9A018 (+1)	USP39	62 kDa	3.3165	2.9207	1.13552
Serine/threonine-protein phosphatase PGAM5, mitochondrial OS=Homo sapiens OX=9606 GN=PGAM5 PE=1 SV=2	Q96HS1	PGAM5	32 kDa	3.3165	2.9207	1.13552
Tyrosine--tRNA ligase, mitochondrial OS=Homo sapiens OX=9606 GN=YARS2 PE=1 SV=2	Q9Y2Z4	YARS2	53 kDa	3.3165	2.9207	1.13552
Cell cycle and apoptosis regulator protein 2 OS=Homo sapiens OX=9606 GN=CCAR2 PE=1 SV=2	Q8N163 (+1)	CCAR2	103 kDa	3.3165	2.9207	1.13552
Echinoderm microtubule associated protein like 3, isoform CRA_e OS=Homo sapiens OX=9606 GN=EML3 PE=1 SV=1	B7WPE2 (+1)	EML3	95 kDa	3.3165	2.9207	1.13552
Inorganic pyrophosphatase OS=Homo sapiens OX=9606 GN=PPA1 PE=1 SV=2	Q15181	PPA1	33 kDa	3.3165	2.9207	1.13552
Fibrinogen gamma chain OS=Homo sapiens OX=9606 GN=FGG PE=1 SV=1	C9JC84 (+3)	FGG	52 kDa	3.3165	2.9207	1.13552
Probable serine carboxypeptidase CPVL OS=Homo sapiens OX=9606 GN=CPVL PE=1 SV=2	Q9H3G5	CPVL	54 kDa	3.3165	2.9207	1.13552
Dihydrolipoyllysine-residue succinyltransferase component of 2-oxoglutarate dehydrogenase complex, mitochondrial OS=Homo sapiens OX=9606 GN=DLST PE=1 SV=4	P36957 (+1)	DLST	49 kDa	3.3165	2.9207	1.13552
Thyroid hormone receptor-associated protein 3 OS=Homo sapiens OX=9606 GN=THRAP3 PE=1 SV=1	A0A3B3ITZ9 (+1)	THRAP3	104 kDa	3.3165	2.9207	1.13552
Alpha-2-macroglobulin receptor-associated protein OS=Homo sapiens OX=9606 GN=LRPAP1 PE=1 SV=1	P30533	LRPAP1	41 kDa	3.3165	2.9207	1.13552
DNA ligase 3 OS=Homo sapiens OX=9606 GN=LIG3 PE=1 SV=2	P49916 (+3)	LIG3	113 kDa	3.3165	2.9207	1.13552
LIM domain and actin-binding protein 1 OS=Homo sapiens OX=9606 GN=LIMA1 PE=1 SV=1	Q9UHB6	LIMA1	85 kDa	3.3165	2.9207	1.13552
Serine hydroxymethyltransferase, cytosolic OS=Homo sapiens OX=9606 GN=SHMT1 PE=1 SV=1	P34896 (+1)	SHMT1	53 kDa	3.3165	2.9207	1.13552
2-oxoglutarate dehydrogenase, mitochondrial OS=Homo sapiens OX=9606 GN=OGDH PE=1 SV=1	A0A0D9SFS3 (+4)	OGDH	113 kDa	3.3165	2.9207	1.13552
Mitochondrial carrier homolog 2 OS=Homo sapiens OX=9606 GN=MTCH2 PE=1 SV=1	Q9Y6C9	MTCH2	33 kDa	3.3165	2.9207	1.13552
Aminoacyl tRNA synthase complex-interacting multifunctional protein 2 OS=Homo sapiens OX=9606 GN=AIMP2 PE=1 SV=2	Q13155	AIMP2	35 kDa	3.3165	2.9207	1.13552
Uncharacterized protein OS=Homo sapiens OX=9606 PE=3 SV=1	A0A1W2PNV4 (+3)		76 kDa	3.3165	2.9207	1.13552
Phosphoglycerate mutase 1 OS=Homo sapiens OX=9606 GN=PGAM1 PE=1 SV=2	P18669	PGAM1	29 kDa	3.3165	2.9207	1.13552
Ras GTPase-activating protein-binding protein 1 OS=Homo sapiens OX=9606 GN=G3BP1 PE=1 SV=1	Q13283	G3BP1	52 kDa	26.532	23.366	1.1355
60S ribosomal protein L15 OS=Homo sapiens OX=9606 GN=RPL15 PE=1 SV=2	P61313	RPL15	24 kDa	9.9494	8.7622	1.13549
Pre-rRNA-processing protein TSR1 homolog OS=Homo sapiens OX=9606 GN=TSR1 PE=1 SV=1	Q2NL82	TSR1	92 kDa	9.9494	8.7622	1.13549
Gem-associated protein 5 OS=Homo sapiens OX=9606 GN=GEMIN5 PE=1 SV=3	Q8TEQ6	GEMIN5	169 kDa	9.9494	8.7622	1.13549
Coatomer subunit gamma-1 OS=Homo sapiens OX=9606 GN=COPG1 PE=1 SV=1	Q9Y678	COPG1	98 kDa	9.9494	8.7622	1.13549
Rab GDP dissociation inhibitor beta OS=Homo sapiens OX=9606 GN=GDI2 PE=1 SV=2	P50395	GDI2	51 kDa	6.6329	5.8415	1.13548
Aldehyde dehydrogenase OS=Homo sapiens OX=9606 GN=ALDH3A2 PE=1 SV=1	A0A5F9ZHI5 (+4)	ALDH3A2	46 kDa	6.6329	5.8415	1.13548
Aminoacyl tRNA synthase complex-interacting multifunctional protein 1 OS=Homo sapiens OX=9606 GN=AIMP1 PE=1 SV=2	Q12904 (+1)	AIMP1	34 kDa	6.6329	5.8415	1.13548
Peroxiredoxin-6 OS=Homo sapiens OX=9606 GN=PRDX6 PE=1 SV=3	P30041	PRDX6	25 kDa	6.6329	5.8415	1.13548
Acetyl-CoA carboxylase 1 OS=Homo sapiens OX=9606 GN=ACACA PE=1 SV=2	Q13085 (+3)	ACACA	266 kDa	6.6329	5.8415	1.13548
mRNA turnover protein 4 homolog OS=Homo sapiens OX=9606 GN=MRTO4 PE=1 SV=2	Q9UKD2	MRTO4	28 kDa	6.6329	5.8415	1.13548
Protein diaphanous homolog 1 OS=Homo sapiens OX=9606 GN=DIAPH1 PE=1 SV=1	A0A0G2JH68 (+5)	DIAPH1	141 kDa	6.6329	5.8415	1.13548
Y-box-binding protein 2 OS=Homo sapiens OX=9606 GN=YBX2 PE=1 SV=2	Q9Y2T7	YBX2	39 kDa	13.929	12.413	1.12213
Hypoxia up-regulated protein 1 OS=Homo sapiens OX=9606 GN=HYOU1 PE=1 SV=1	A0A494C039 (+1)	HYOU1	111 kDa	10.613	9.4924	1.11805
Eukaryotic translation initiation factor 5 OS=Homo sapiens OX=9606 GN=EIF5 PE=1 SV=2	P55010	EIF5	49 kDa	10.613	9.4924	1.11805
DNA replication licensing factor MCM2 (Fragment) OS=Homo sapiens OX=9606 GN=MCM2 PE=1 SV=1	H0Y8E6 (+1)	MCM2	94 kDa	10.613	9.4924	1.11805
60S ribosomal protein L4 OS=Homo sapiens OX=9606 GN=RPL4 PE=1 SV=5	P36578	RPL4	48 kDa	28.521	25.557	1.11598
Elongation factor 1-alpha 1 OS=Homo sapiens OX=9606 GN=EEF1A1 PE=1 SV=2	A0A087WVQ9 (+2)	EEF1A1	50 kDa	25.205	22.636	1.11349
Transcription intermediary factor 1-beta OS=Homo sapiens OX=9606 GN=TRIM28 PE=1 SV=5	Q13263	TRIM28	89 kDa	14.592	13.143	1.11025
SPATS2-like protein OS=Homo sapiens OX=9606 GN=SPATS2L PE=1 SV=2	Q9NUQ6 (+2)	SPATS2L	62 kDa	14.592	13.143	1.11025
DNA replication licensing factor MCM3 OS=Homo sapiens OX=9606 GN=MCM3 PE=1 SV=3	P25205 (+1)	MCM3	91 kDa	14.592	13.143	1.11025
Serine--tRNA ligase, cytoplasmic OS=Homo sapiens OX=9606 GN=SARS1 PE=1 SV=3	P49591 (+1)	SARS1	59 kDa	7.2962	6.5717	1.11025
Ubiquitin-associated protein 2 OS=Homo sapiens OX=9606 GN=UBAP2 PE=1 SV=1	Q5T6F2	UBAP2	117 kDa	7.2962	6.5717	1.11025
ATP-dependent 6-phosphofructokinase OS=Homo sapiens OX=9606 GN=PFKM PE=1 SV=1	A0A2R8Y891 (+2)	PFKM	97 kDa	7.2962	6.5717	1.11025
Non-histone chromosomal protein HMG-14 OS=Homo sapiens OX=9606 GN=HMGN1 PE=1 SV=1	A6NEL0 (+1)	HMGN1	12 kDa	7.2962	6.5717	1.11025
Stress-induced-phosphoprotein 1 OS=Homo sapiens OX=9606 GN=STIP1 PE=1 SV=1	P31948 (+1)	STIP1	63 kDa	7.2962	6.5717	1.11025
60S ribosomal protein L27a OS=Homo sapiens OX=9606 GN=RPL27A PE=1 SV=2	P46776	RPL27A	17 kDa	7.2962	6.5717	1.11025
Glutamine--fructose-6-phosphate aminotransferase [isomerizing] 1 OS=Homo sapiens OX=9606 GN=GFPT1 PE=1 SV=3	Q06210 (+1)	GFPT1	79 kDa	7.2962	6.5717	1.11025
Very-long-chain enoyl-CoA reductase OS=Homo sapiens OX=9606 GN=TECR PE=1 SV=1	Q9NZ01	TECR	36 kDa	7.2962	6.5717	1.11025
Heterogeneous nuclear ribonucleoprotein D0 OS=Homo sapiens OX=9606 GN=HNRNPD PE=1 SV=1	Q14103 (+1)	HNRNPD	38 kDa	7.2962	6.5717	1.11025
Protein disulfide-isomerase A4 OS=Homo sapiens OX=9606 GN=PDIA4 PE=1 SV=2	P13667	PDIA4	73 kDa	18.572	16.794	1.10587
Clathrin heavy chain OS=Homo sapiens OX=9606 GN=CLTC PE=1 SV=1	A0A087WVQ6 (+2)	CLTC	192 kDa	18.572	16.794	1.10587
Heterogeneous nuclear ribonucleoprotein L OS=Homo sapiens OX=9606 GN=HNRNPL PE=1 SV=2	P14866	HNRNPL	64 kDa	11.276	10.223	1.103
Arginine--tRNA ligase, cytoplasmic OS=Homo sapiens OX=9606 GN=RARS1 PE=1 SV=2	P54136	RARS1	75 kDa	11.276	10.223	1.103
Structural maintenance of chromosomes protein OS=Homo sapiens OX=9606 GN=SMC4 PE=1 SV=1	E9PD53 (+1)	SMC4	144 kDa	11.276	10.223	1.103
Endoplasmic reticulum resident protein 44 OS=Homo sapiens OX=9606 GN=ERP44 PE=1 SV=1	Q9BS26	ERP44	47 kDa	11.276	10.223	1.103
Kinesin-1 heavy chain OS=Homo sapiens OX=9606 GN=KIF5B PE=1 SV=1	P33176	KIF5B	110 kDa	15.256	13.874	1.09961
Eukaryotic initiation factor 4A-II OS=Homo sapiens OX=9606 GN=EIF4A2 PE=1 SV=2	Q14240 (+1)	EIF4A2	46 kDa	15.256	13.874	1.09961
Aspartate--tRNA ligase, cytoplasmic OS=Homo sapiens OX=9606 GN=DARS1 PE=1 SV=2	P14868	DARS1	57 kDa	15.256	13.874	1.09961
Ribosome-binding protein 1 OS=Homo sapiens OX=9606 GN=RRBP1 PE=1 SV=5	Q9P2E9	RRBP1	152 kDa	65.002	59.145	1.09903
40S ribosomal protein S2 (Fragment) OS=Homo sapiens OX=9606 GN=RPS2 PE=1 SV=1	H0YEN5 (+1)	RPS2	21 kDa	23.215	21.175	1.09634
Helicase SKI2W OS=Homo sapiens OX=9606 GN=SKIV2L PE=1 SV=3	Q15477	SKIV2L	138 kDa	3.9797	3.6509	1.09006
THO complex subunit 4 OS=Homo sapiens OX=9606 GN=ALYREF PE=1 SV=1	E9PB61	ALYREF	28 kDa	3.9797	3.6509	1.09006
DNA-directed RNA polymerase, mitochondrial OS=Homo sapiens OX=9606 GN=POLRMT PE=1 SV=2	O00411	POLRMT	139 kDa	3.9797	3.6509	1.09006
Casein kinase II subunit alpha OS=Homo sapiens OX=9606 GN=CSNK2A1 PE=1 SV=1	A0A2R8Y5A0 (+4)	CSNK2A1	41 kDa	3.9797	3.6509	1.09006
Nucleosome assembly protein 1-like 4 (Fragment) OS=Homo sapiens OX=9606 GN=NAP1L4 PE=1 SV=1	C9J6D1 (+8)	NAP1L4	20 kDa	3.9797	3.6509	1.09006
RNA helicase OS=Homo sapiens OX=9606 GN=hCG_2043426 PE=1 SV=1	F6QDS0 (+6)	hCG_2043426	54 kDa	3.9797	3.6509	1.09006
DnaJ homolog subfamily B member 1 OS=Homo sapiens OX=9606 GN=DNAJB1 PE=1 SV=4	P25685	DNAJB1	38 kDa	3.9797	3.6509	1.09006
Protein PAT1 homolog 1 OS=Homo sapiens OX=9606 GN=PATL1 PE=1 SV=2	Q86TB9 (+2)	PATL1	87 kDa	3.9797	3.6509	1.09006
Purine nucleoside phosphorylase OS=Homo sapiens OX=9606 GN=PNP PE=1 SV=2	P00491	PNP	32 kDa	3.9797	3.6509	1.09006
Inorganic pyrophosphatase 2, mitochondrial OS=Homo sapiens OX=9606 GN=PPA2 PE=1 SV=2	Q9H2U2 (+1)	PPA2	38 kDa	3.9797	3.6509	1.09006
Heat shock 70 kDa protein 14 OS=Homo sapiens OX=9606 GN=HSPA14 PE=1 SV=1	Q0VDF9	HSPA14	55 kDa	3.9797	3.6509	1.09006
Transmembrane emp24 domain-containing protein 10 OS=Homo sapiens OX=9606 GN=TMED10 PE=1 SV=2	P49755	TMED10	25 kDa	3.9797	3.6509	1.09006
Seryl-tRNA synthetase OS=Homo sapiens OX=9606 GN=SARS2 PE=1 SV=1	M0QWZ7 (+1)	SARS2	58 kDa	3.9797	3.6509	1.09006
Importin-7 OS=Homo sapiens OX=9606 GN=IPO7 PE=1 SV=1	O95373	IPO7	120 kDa	3.9797	3.6509	1.09006
Nucleolar GTP-binding protein 2 OS=Homo sapiens OX=9606 GN=GNL2 PE=1 SV=1	Q13823	GNL2	84 kDa	3.9797	3.6509	1.09006
Sister chromatid cohesion protein PDS5 homolog B OS=Homo sapiens OX=9606 GN=PDS5B PE=1 SV=1	Q9NTI5 (+1)	PDS5B	165 kDa	3.9797	3.6509	1.09006
Heterogeneous nuclear ribonucleoprotein U-like protein 2 OS=Homo sapiens OX=9606 GN=HNRNPUL2 PE=1 SV=1	Q1KMD3	HNRNPUL2	85 kDa	7.9595	7.3019	1.09006
ADP/ATP translocase 2 OS=Homo sapiens OX=9606 GN=SLC25A5 PE=1 SV=7	P05141	SLC25A5	33 kDa	7.9595	7.3019	1.09006
14-3-3 protein epsilon OS=Homo sapiens OX=9606 GN=YWHAE PE=1 SV=1	P62258	YWHAE	29 kDa	7.9595	7.3019	1.09006
Long-chain-fatty-acid--CoA ligase 5 OS=Homo sapiens OX=9606 GN=ACSL5 PE=1 SV=1	Q9ULC5 (+1)	ACSL5	76 kDa	7.9595	7.3019	1.09006
Annexin OS=Homo sapiens OX=9606 GN=ANXA2 PE=1 SV=2	H0YMW4 (+2)	ANXA2	42 kDa	19.899	18.255	1.09006
40S ribosomal protein S10 OS=Homo sapiens OX=9606 GN=RPS10 PE=1 SV=1	P46783	RPS10	19 kDa	15.919	14.604	1.09004
Pyruvate kinase PKM OS=Homo sapiens OX=9606 GN=PKM PE=1 SV=4	P14618	PKM	58 kDa	20.562	18.985	1.08307
Golgi apparatus protein 1 OS=Homo sapiens OX=9606 GN=GLG1 PE=1 SV=2	Q92896 (+2)	GLG1	135 kDa	20.562	18.985	1.08307
Pre-mRNA-splicing factor ATP-dependent RNA helicase DHX15 OS=Homo sapiens OX=9606 GN=DHX15 PE=1 SV=2	O43143	DHX15	91 kDa	12.603	11.683	1.07875
X-ray repair cross-complementing protein 6 OS=Homo sapiens OX=9606 GN=XRCC6 PE=1 SV=2	P12956	XRCC6	70 kDa	25.205	23.366	1.0787
Cytoskeleton-associated protein 5 OS=Homo sapiens OX=9606 GN=CKAP5 PE=1 SV=3	Q14008 (+1)	CKAP5	226 kDa	21.225	19.715	1.07659
Microtubule-associated protein OS=Homo sapiens OX=9606 GN=MAP4 PE=1 SV=1	E7EVA0	MAP4	245 kDa	17.246	16.064	1.07358
Cytoskeleton-associated protein 4 OS=Homo sapiens OX=9606 GN=CKAP4 PE=1 SV=2	Q07065	CKAP4	66 kDa	17.246	16.064	1.07358
60S ribosomal protein L18 (Fragment) OS=Homo sapiens OX=9606 GN=RPL18 PE=1 SV=1	J3QQ67	RPL18	22 kDa	17.246	16.064	1.07358
eIF-2-alpha kinase activator GCN1 OS=Homo sapiens OX=9606 GN=GCN1 PE=1 SV=6	Q92616	GCN1	293 kDa	43.114	40.16	1.07356
Early endosome antigen 1 OS=Homo sapiens OX=9606 GN=EEA1 PE=1 SV=2	Q15075	EEA1	162 kDa	8.6228	8.0321	1.07354
DNA damage-binding protein 1 OS=Homo sapiens OX=9606 GN=DDB1 PE=1 SV=1	Q16531	DDB1	127 kDa	8.6228	8.0321	1.07354
RuvB-like 1 OS=Homo sapiens OX=9606 GN=RUVBL1 PE=1 SV=1	Q9Y265	RUVBL1	50 kDa	8.6228	8.0321	1.07354
Prohibitin OS=Homo sapiens OX=9606 GN=PHB PE=1 SV=1	P35232	PHB	30 kDa	8.6228	8.0321	1.07354
DNA replication licensing factor MCM6 OS=Homo sapiens OX=9606 GN=MCM6 PE=1 SV=1	Q14566	MCM6	93 kDa	13.266	12.413	1.06872
Glyceraldehyde-3-phosphate dehydrogenase OS=Homo sapiens OX=9606 GN=GAPDH PE=1 SV=3	P04406	GAPDH	36 kDa	17.909	16.794	1.06639
Cytoplasmic dynein 1 heavy chain 1 OS=Homo sapiens OX=9606 GN=DYNC1H1 PE=1 SV=5	Q14204	DYNC1H1	532 kDa	55.053	51.843	1.06192
T-complex protein 1 subunit delta OS=Homo sapiens OX=9606 GN=CCT4 PE=1 SV=4	P50991	CCT4	58 kDa	13.929	13.143	1.0598
T-complex protein 1 subunit eta OS=Homo sapiens OX=9606 GN=CCT7 PE=1 SV=2	Q99832 (+1)	CCT7	59 kDa	13.929	13.143	1.0598
Peroxiredoxin-1 (Fragment) OS=Homo sapiens OX=9606 GN=PRDX1 PE=1 SV=1	A0A0A0MSI0 (+1)	PRDX1	19 kDa	9.2861	8.7622	1.05979
116 kDa U5 small nuclear ribonucleoprotein component OS=Homo sapiens OX=9606 GN=EFTUD2 PE=1 SV=1	Q15029 (+2)	EFTUD2	109 kDa	9.2861	8.7622	1.05979
40S ribosomal protein S5 OS=Homo sapiens OX=9606 GN=RPS5 PE=1 SV=1	M0R0R2 (+1)	RPS5	25 kDa	9.2861	8.7622	1.05979
Isoform 2 of ATP-dependent RNA helicase DHX30 OS=Homo sapiens OX=9606 GN=DHX30	Q7L2E3-2	DHX30	136 kDa	9.2861	8.7622	1.05979
Leucine-rich repeat-containing protein 59 OS=Homo sapiens OX=9606 GN=LRRC59 PE=1 SV=1	Q96AG4	LRRC59	35 kDa	9.2861	8.7622	1.05979
Long-chain-fatty-acid--CoA ligase 3 OS=Homo sapiens OX=9606 GN=ACSL3 PE=1 SV=3	O95573	ACSL3	80 kDa	9.2861	8.7622	1.05979
Serine/threonine-protein phosphatase PP1-alpha catalytic subunit OS=Homo sapiens OX=9606 GN=PPP1CA PE=1 SV=1	P62136	PPP1CA	38 kDa	9.2861	8.7622	1.05979
Erlin-1 OS=Homo sapiens OX=9606 GN=ERLIN1 PE=1 SV=2	O75477	ERLIN1	39 kDa	4.643	4.3811	1.05978
60S ribosomal protein L19 OS=Homo sapiens OX=9606 GN=RPL19 PE=4 SV=1	A0A7I2YQG2 (+3)	RPL19	26 kDa	4.643	4.3811	1.05978
GTPase KRas OS=Homo sapiens OX=9606 GN=KRAS PE=1 SV=1	P01116	KRAS	22 kDa	4.643	4.3811	1.05978
Guanine nucleotide exchange factor H1 OS=Homo sapiens OX=9606 GN=ARHGEF2 PE=1 SV=1	A0A5F9ZI21 (+1)	ARHGEF2	127 kDa	4.643	4.3811	1.05978
Dolichyl-diphosphooligosaccharide--protein glycosyltransferase 48 kDa subunit OS=Homo sapiens OX=9606 GN=DDOST PE=1 SV=1	A0A0C4DGS1 (+1)	DDOST	49 kDa	4.643	4.3811	1.05978
NADH-cytochrome b5 reductase 3 OS=Homo sapiens OX=9606 GN=CYB5R3 PE=1 SV=3	P00387 (+2)	CYB5R3	34 kDa	4.643	4.3811	1.05978
Dihydrolipoyl dehydrogenase, mitochondrial OS=Homo sapiens OX=9606 GN=DLD PE=1 SV=2	P09622	DLD	54 kDa	4.643	4.3811	1.05978
Isocitrate dehydrogenase [NADP], mitochondrial OS=Homo sapiens OX=9606 GN=IDH2 PE=1 SV=2	P48735 (+1)	IDH2	51 kDa	4.643	4.3811	1.05978
Succinate--CoA ligase [ADP/GDP-forming] subunit alpha, mitochondrial OS=Homo sapiens OX=9606 GN=SUCLG1 PE=1 SV=4	P53597	SUCLG1	36 kDa	4.643	4.3811	1.05978
Protein mago nashi homolog OS=Homo sapiens OX=9606 GN=MAGOH PE=1 SV=1	P61326 (+1)	MAGOH	17 kDa	4.643	4.3811	1.05978
Cisplatin resistance-associated overexpressed protein, isoform CRA_b OS=Homo sapiens OX=9606 GN=LUC7L3 PE=1 SV=1	J3KPP4 (+1)	LUC7L3	58 kDa	4.643	4.3811	1.05978
Non-specific serine/threonine protein kinase OS=Homo sapiens OX=9606 GN=MARK2 PE=1 SV=3	E9PC69 (+3)	MARK2	87 kDa	4.643	4.3811	1.05978
60S ribosomal protein L29 OS=Homo sapiens OX=9606 GN=RPL29 PE=1 SV=1	A0A3B3ITT5	RPL29	19 kDa	4.643	4.3811	1.05978
Cysteine desulfurase, mitochondrial OS=Homo sapiens OX=9606 GN=NFS1 PE=1 SV=3	Q9Y697 (+1)	NFS1	50 kDa	4.643	4.3811	1.05978
Cold-inducible RNA-binding protein OS=Homo sapiens OX=9606 GN=CIRBP PE=1 SV=1	Q14011	CIRBP	19 kDa	4.643	4.3811	1.05978
Intracellular hyaluronan-binding protein 4 OS=Homo sapiens OX=9606 GN=HABP4 PE=1 SV=1	Q5JVS0	HABP4	46 kDa	4.643	4.3811	1.05978
Heterogeneous nuclear ribonucleoprotein A0 OS=Homo sapiens OX=9606 GN=HNRNPA0 PE=1 SV=1	Q13151	HNRNPA0	31 kDa	4.643	4.3811	1.05978
Dihydropyrimidinase-related protein 3 OS=Homo sapiens OX=9606 GN=DPYSL3 PE=1 SV=1	Q14195 (+1)	DPYSL3	62 kDa	4.643	4.3811	1.05978
Heterogeneous nuclear ribonucleoprotein R OS=Homo sapiens OX=9606 GN=HNRNPR PE=1 SV=1	O43390	HNRNPR	71 kDa	19.235	18.255	1.05368
Caprin-1 OS=Homo sapiens OX=9606 GN=CAPRIN1 PE=1 SV=2	Q14444	CAPRIN1	78 kDa	14.592	13.874	1.05175
CCR4-NOT transcription complex subunit 1 OS=Homo sapiens OX=9606 GN=CNOT1 PE=1 SV=2	A5YKK6	CNOT1	267 kDa	24.542	23.366	1.05033
SRSF protein kinase 1 (Fragment) OS=Homo sapiens OX=9606 GN=SRPK1 PE=1 SV=1	H3BLV9 (+3)	SRPK1	76 kDa	9.9494	9.4924	1.04814
DNA replication licensing factor MCM7 OS=Homo sapiens OX=9606 GN=MCM7 PE=1 SV=4	P33993	MCM7	81 kDa	9.9494	9.4924	1.04814
60S ribosomal protein L18a OS=Homo sapiens OX=9606 GN=RPL18A PE=1 SV=1	M0R117 (+1)	RPL18A	18 kDa	9.9494	9.4924	1.04814
Mannosyl-oligosaccharide glucosidase OS=Homo sapiens OX=9606 GN=MOGS PE=1 SV=5	Q13724	MOGS	92 kDa	15.256	14.604	1.04465
Triosephosphate isomerase OS=Homo sapiens OX=9606 GN=TPI1 PE=1 SV=4	P60174 (+1)	TPI1	27 kDa	5.3063	5.1113	1.03815
Ras-related protein Rap-1A OS=Homo sapiens OX=9606 GN=RAP1A PE=1 SV=1	P62834	RAP1A	21 kDa	5.3063	5.1113	1.03815
Unconventional myosin-Ic OS=Homo sapiens OX=9606 GN=MYO1C PE=1 SV=1	F5H6E2	MYO1C	119 kDa	5.3063	5.1113	1.03815
Beta-catenin-like protein 1 OS=Homo sapiens OX=9606 GN=CTNNBL1 PE=1 SV=1	A0A087WUB9 (+2)	CTNNBL1	66 kDa	5.3063	5.1113	1.03815
General transcription factor II-I OS=Homo sapiens OX=9606 GN=GTF2I PE=1 SV=1	A0A494C1K3 (+4)	GTF2I	131 kDa	5.3063	5.1113	1.03815
F-actin-capping protein subunit beta OS=Homo sapiens OX=9606 GN=CAPZB PE=1 SV=1	B1AK88 (+1)	CAPZB	34 kDa	5.3063	5.1113	1.03815
Septin 10, isoform CRA_c OS=Homo sapiens OX=9606 GN=SEPTIN10 PE=1 SV=2	B5ME97 (+1)	SEPTIN10	63 kDa	5.3063	5.1113	1.03815
Asparagine--tRNA ligase, cytoplasmic OS=Homo sapiens OX=9606 GN=NARS1 PE=1 SV=1	O43776	NARS1	63 kDa	5.3063	5.1113	1.03815
Signal recognition particle subunit SRP72 OS=Homo sapiens OX=9606 GN=SRP72 PE=1 SV=3	O76094 (+1)	SRP72	75 kDa	5.3063	5.1113	1.03815
V-type proton ATPase subunit B, brain isoform OS=Homo sapiens OX=9606 GN=ATP6V1B2 PE=1 SV=3	P21281	ATP6V1B2	57 kDa	5.3063	5.1113	1.03815
DnaJ homolog subfamily A member 1 OS=Homo sapiens OX=9606 GN=DNAJA1 PE=1 SV=2	P31689	DNAJA1	45 kDa	5.3063	5.1113	1.03815
Mitochondrial import receptor subunit TOM34 OS=Homo sapiens OX=9606 GN=TOMM34 PE=1 SV=2	Q15785	TOMM34	35 kDa	5.3063	5.1113	1.03815
Dimethyladenosine transferase 1, mitochondrial OS=Homo sapiens OX=9606 GN=TFB1M PE=1 SV=1	Q8WVM0	TFB1M	40 kDa	5.3063	5.1113	1.03815
Protein S100-A10 OS=Homo sapiens OX=9606 GN=S100A10 PE=1 SV=2	P60903	S100A10	11 kDa	5.3063	5.1113	1.03815
Dynamin-1-like protein OS=Homo sapiens OX=9606 GN=DNM1L PE=1 SV=2	O00429 (+3)	DNM1L	82 kDa	10.613	10.223	1.03815
Importin subunit beta-1 OS=Homo sapiens OX=9606 GN=KPNB1 PE=1 SV=2	Q14974	KPNB1	97 kDa	10.613	10.223	1.03815
Filamin-A OS=Homo sapiens OX=9606 GN=FLNA PE=1 SV=4	P21333 (+1)	FLNA	281 kDa	33.165	32.128	1.03228
ATP-dependent RNA helicase DHX29 OS=Homo sapiens OX=9606 GN=DHX29 PE=1 SV=1	A0A087WYN9 (+1)	DHX29	155 kDa	11.276	10.953	1.02949
Developmentally-regulated GTP-binding protein 1 OS=Homo sapiens OX=9606 GN=DRG1 PE=1 SV=1	Q9Y295	DRG1	41 kDa	11.276	10.953	1.02949
Tubulin beta chain OS=Homo sapiens OX=9606 GN=TUBB PE=1 SV=2	P07437	TUBB	50 kDa	17.909	17.524	1.02197
Stomatin-like protein 2, mitochondrial OS=Homo sapiens OX=9606 GN=STOML2 PE=1 SV=1	A0A087WYB4 (+1)	STOML2	33 kDa	5.9696	5.8415	1.02193
Microprocessor complex subunit DGCR8 OS=Homo sapiens OX=9606 GN=DGCR8 PE=1 SV=1	Q8WYQ5 (+1)	DGCR8	86 kDa	5.9696	5.8415	1.02193
Heterogeneous nuclear ribonucleoprotein H OS=Homo sapiens OX=9606 GN=HNRNPH1 PE=1 SV=1	E9PCY7 (+2)	HNRNPH1	47 kDa	5.9696	5.8415	1.02193
Phenylalanine--tRNA ligase OS=Homo sapiens OX=9606 GN=FARSA PE=1 SV=1	K7ER00 (+1)	FARSA	62 kDa	5.9696	5.8415	1.02193
E3 UFM1-protein ligase 1 OS=Homo sapiens OX=9606 GN=UFL1 PE=1 SV=2	O94874	UFL1	90 kDa	5.9696	5.8415	1.02193
40S ribosomal protein S12 OS=Homo sapiens OX=9606 GN=RPS12 PE=1 SV=3	P25398	RPS12	15 kDa	5.9696	5.8415	1.02193
Serine/threonine-protein phosphatase 4 regulatory subunit 3A OS=Homo sapiens OX=9606 GN=PPP4R3A PE=1 SV=1	Q6IN85 (+1)	PPP4R3A	95 kDa	5.9696	5.8415	1.02193
60S ribosomal protein L9 OS=Homo sapiens OX=9606 GN=RPL9 PE=1 SV=1	P32969	RPL9	22 kDa	5.9696	5.8415	1.02193
60S ribosomal protein L38 OS=Homo sapiens OX=9606 GN=RPL38 PE=1 SV=2	P63173	RPL38	8 kDa	5.9696	5.8415	1.02193
Putative RNA-binding protein Luc7-like 1 OS=Homo sapiens OX=9606 GN=LUC7L PE=1 SV=1	Q9NQ29 (+1)	LUC7L	44 kDa	5.9696	5.8415	1.02193
Translocating chain-associated membrane protein 1 OS=Homo sapiens OX=9606 GN=TRAM1 PE=1 SV=1	G3XAN4 (+2)	TRAM1	33 kDa	5.9696	5.8415	1.02193
Ubiquitin carboxyl-terminal hydrolase 10 OS=Homo sapiens OX=9606 GN=USP10 PE=1 SV=2	Q14694 (+2)	USP10	87 kDa	11.939	11.683	1.02191
60S ribosomal protein L10 OS=Homo sapiens OX=9606 GN=RPL10 PE=1 SV=4	P27635	RPL10	25 kDa	13.266	13.143	1.00936
Phenylalanine--tRNA ligase beta subunit OS=Homo sapiens OX=9606 GN=FARSB PE=1 SV=3	Q9NSD9	FARSB	66 kDa	13.266	13.143	1.00936
Protein disulfide-isomerase A3 OS=Homo sapiens OX=9606 GN=PDIA3 PE=1 SV=4	P30101	PDIA3	57 kDa	19.899	19.715	1.00933
Keratin, type II cytoskeletal 71 OS=Homo sapiens OX=9606 GN=KRT71 PE=1 SV=3	Q3SY84	KRT71	57 kDa	6.6329	6.5717	1.00931
Exosome component 10 OS=Homo sapiens OX=9606 GN=EXOSC10 PE=1 SV=2	Q01780 (+1)	EXOSC10	101 kDa	6.6329	6.5717	1.00931
Polypyrimidine tract-binding protein 1 OS=Homo sapiens OX=9606 GN=PTBP1 PE=1 SV=1	A0A0U1RRM4 (+5)	PTBP1	62 kDa	6.6329	6.5717	1.00931
Enhancer of mRNA-decapping protein 4 OS=Homo sapiens OX=9606 GN=EDC4 PE=1 SV=1	Q6P2E9	EDC4	152 kDa	6.6329	6.5717	1.00931
Procollagen galactosyltransferase 1 OS=Homo sapiens OX=9606 GN=COLGALT1 PE=1 SV=1	Q8NBJ5	COLGALT1	72 kDa	6.6329	6.5717	1.00931
Translocation protein SEC63 homolog OS=Homo sapiens OX=9606 GN=SEC63 PE=1 SV=2	Q9UGP8	SEC63	88 kDa	6.6329	6.5717	1.00931
Tropomyosin alpha-4 chain OS=Homo sapiens OX=9606 GN=TPM4 PE=1 SV=1	A0A2R8Y5V9 (+1)	TPM4	29 kDa	6.6329	6.5717	1.00931
Poly [ADP-ribose] polymerase 1 OS=Homo sapiens OX=9606 GN=PARP1 PE=1 SV=4	P09874	PARP1	113 kDa	13.929	13.874	1.00396
T-complex protein 1 subunit gamma OS=Homo sapiens OX=9606 GN=CCT3 PE=1 SV=4	P49368	CCT3	61 kDa	13.929	13.874	1.00396
Myosin-9 OS=Homo sapiens OX=9606 GN=MYH9 PE=1 SV=4	P35579	MYH9	227 kDa	57.706	57.685	1.00036
RNA helicase OS=Homo sapiens OX=9606 GN=DDX3X PE=1 SV=1	A0A0D9SF53 (+10)	DDX3X	81 kDa	29.185	29.207	0.999247
5'-3' exoribonuclease 2 OS=Homo sapiens OX=9606 GN=XRN2 PE=1 SV=1	Q9H0D6	XRN2	109 kDa	7.2962	7.3019	0.999219
DNA topoisomerase 2-alpha OS=Homo sapiens OX=9606 GN=TOP2A PE=1 SV=3	P11388 (+3)	TOP2A	174 kDa	7.2962	7.3019	0.999219
Calpain inhibitor OS=Homo sapiens OX=9606 GN=CAST PE=1 SV=2	A0A0C4DGB5 (+4)	CAST	80 kDa	7.2962	7.3019	0.999219
cAMP-dependent protein kinase catalytic subunit alpha OS=Homo sapiens OX=9606 GN=PRKACA PE=4 SV=1	A0A7I2V5J4 (+2)	PRKACA	34 kDa	7.2962	7.3019	0.999219
Long-chain-fatty-acid--CoA ligase 1 OS=Homo sapiens OX=9606 GN=ACSL1 PE=1 SV=1	E7EPM6 (+2)	ACSL1	74 kDa	7.2962	7.3019	0.999219
40S ribosomal protein S7 OS=Homo sapiens OX=9606 GN=RPS7 PE=1 SV=1	P62081	RPS7	22 kDa	7.2962	7.3019	0.999219
Nicalin OS=Homo sapiens OX=9606 GN=NCLN PE=1 SV=2	Q969V3 (+1)	NCLN	63 kDa	7.2962	7.3019	0.999219
Calmodulin-regulated spectrin-associated protein 3 OS=Homo sapiens OX=9606 GN=CAMSAP3 PE=1 SV=2	Q9P1Y5	CAMSAP3	135 kDa	7.2962	7.3019	0.999219
Eukaryotic translation initiation factor 2 subunit 3 OS=Homo sapiens OX=9606 GN=EIF2S3 PE=1 SV=3	P41091	EIF2S3	51 kDa	14.592	14.604	0.999178
RNA helicase OS=Homo sapiens OX=9606 GN=MOV10 PE=1 SV=1	Q5JR04 (+1)	MOV10	107 kDa	15.256	15.334	0.994913
40S ribosomal protein S14 (Fragment) OS=Homo sapiens OX=9606 GN=RPS14 PE=1 SV=1	A0A2R8Y811 (+1)	RPS14	16 kDa	15.919	16.064	0.990974
60S ribosomal protein L32 OS=Homo sapiens OX=9606 GN=RPL32 PE=1 SV=1	F8W727 (+1)	RPL32	18 kDa	7.9595	8.0321	0.990961
Pumilio homolog 1 (Fragment) OS=Homo sapiens OX=9606 GN=PUM1 PE=1 SV=1	H0YEH2	PUM1	120 kDa	7.9595	8.0321	0.990961
3-ketoacyl-CoA thiolase, peroxisomal OS=Homo sapiens OX=9606 GN=ACAA1 PE=1 SV=2	P09110	ACAA1	44 kDa	7.9595	8.0321	0.990961
3-ketoacyl-CoA thiolase, mitochondrial OS=Homo sapiens OX=9606 GN=ACAA2 PE=1 SV=2	P42765	ACAA2	42 kDa	7.9595	8.0321	0.990961
Glycerophosphocholine phosphodiesterase GPCPD1 OS=Homo sapiens OX=9606 GN=GPCPD1 PE=1 SV=2	Q9NPB8	GPCPD1	76 kDa	7.9595	8.0321	0.990961
Isoform 2 of SRSF protein kinase 2 OS=Homo sapiens OX=9606 GN=SRPK2	P78362-2	SRPK2	79 kDa	7.9595	8.0321	0.990961
Elongation factor 2 OS=Homo sapiens OX=9606 GN=EEF2 PE=1 SV=4	P13639	EEF2	95 kDa	23.878	24.096	0.990953
Regulator of nonsense transcripts 1 OS=Homo sapiens OX=9606 GN=UPF1 PE=1 SV=2	Q92900 (+1)	UPF1	124 kDa	24.542	24.826	0.98856
Fatty acid synthase OS=Homo sapiens OX=9606 GN=FASN PE=1 SV=3	P49327	FASN	273 kDa	24.542	24.826	0.98856
40S ribosomal protein S17 OS=Homo sapiens OX=9606 PE=3 SV=2	H3BNC9		65 kDa	8.6228	8.7622	0.984091
Aspartate carbamoyltransferase OS=Homo sapiens OX=9606 GN=CAD PE=1 SV=1	F8VPD4 (+1)	CAD	236 kDa	8.6228	8.7622	0.984091
La-related protein 4B OS=Homo sapiens OX=9606 GN=LARP4B PE=1 SV=3	Q92615	LARP4B	81 kDa	8.6228	8.7622	0.984091
UDP-glucose 6-dehydrogenase OS=Homo sapiens OX=9606 GN=UGDH PE=1 SV=1	O60701	UGDH	55 kDa	8.6228	8.7622	0.984091
Ornithine aminotransferase, mitochondrial OS=Homo sapiens OX=9606 GN=OAT PE=1 SV=1	P04181	OAT	49 kDa	8.6228	8.7622	0.984091
Neutral alpha-glucosidase AB OS=Homo sapiens OX=9606 GN=GANAB PE=1 SV=3	Q14697 (+1)	GANAB	107 kDa	8.6228	8.7622	0.984091
CCR4-NOT transcription complex subunit 10 OS=Homo sapiens OX=9606 GN=CNOT10 PE=1 SV=1	Q9H9A5 (+2)	CNOT10	82 kDa	8.6228	8.7622	0.984091
Protein PRRC2C OS=Homo sapiens OX=9606 GN=PRRC2C PE=1 SV=1	E7EPN9 (+1)	PRRC2C	309 kDa	25.868	26.287	0.984061
60S ribosomal protein L10a OS=Homo sapiens OX=9606 GN=RPL10A PE=1 SV=2	P62906	RPL10A	25 kDa	17.909	18.255	0.981046
Heat shock 70 kDa protein 4 OS=Homo sapiens OX=9606 GN=HSPA4 PE=1 SV=4	P34932	HSPA4	94 kDa	9.2861	9.4924	0.978267
60 kDa heat shock protein, mitochondrial OS=Homo sapiens OX=9606 GN=HSPD1 PE=1 SV=2	P10809	HSPD1	61 kDa	28.521	29.207	0.976512
Isoform 8 of Breast cancer anti-estrogen resistance protein 1 OS=Homo sapiens OX=9606 GN=BCAR1	P56945-8	BCAR1	93 kDa	19.235	19.715	0.975653
Serpin H1 OS=Homo sapiens OX=9606 GN=SERPINH1 PE=1 SV=2	P50454	SERPINH1	46 kDa	19.235	19.715	0.975653
Kinesin-like protein OS=Homo sapiens OX=9606 GN=KIF2A PE=1 SV=1	A0A6Q8PFA6 (+2)	KIF2A	78 kDa	9.9494	10.223	0.973237
Ensconsin OS=Homo sapiens OX=9606 GN=MAP7 PE=1 SV=1	Q14244 (+1)	MAP7	84 kDa	9.9494	10.223	0.973237
ATPase family AAA domain-containing protein 3A OS=Homo sapiens OX=9606 GN=ATAD3A PE=1 SV=2	Q9NVI7	ATAD3A	71 kDa	9.9494	10.223	0.973237
Serine/arginine repetitive matrix protein 1 OS=Homo sapiens OX=9606 GN=SRRM1 PE=1 SV=1	A9Z1X7 (+1)	SRRM1	103 kDa	9.9494	10.223	0.973237
Elongation factor 1-delta OS=Homo sapiens OX=9606 GN=EEF1D PE=1 SV=1	E9PRY8 (+2)	EEF1D	77 kDa	9.9494	10.223	0.973237
Ras GTPase-activating-like protein IQGAP2 OS=Homo sapiens OX=9606 GN=IQGAP2 PE=1 SV=2	F5H7S7 (+1)	IQGAP2	174 kDa	9.9494	10.223	0.973237
ATP-dependent DNA helicase Q1 OS=Homo sapiens OX=9606 GN=RECQL PE=1 SV=3	P46063	RECQL	73 kDa	20.562	21.175	0.971051
2',3'-cyclic-nucleotide 3'-phosphodiesterase OS=Homo sapiens OX=9606 GN=CNP PE=1 SV=2	P09543 (+1)	CNP	48 kDa	10.613	10.953	0.968958
Coatomer subunit alpha OS=Homo sapiens OX=9606 GN=COPA PE=1 SV=2	P53621 (+1)	COPA	138 kDa	11.276	11.683	0.965163
Ankyrin repeat domain-containing protein 17 (Fragment) OS=Homo sapiens OX=9606 GN=ANKRD17 PE=1 SV=1	H0YM23 (+3)	ANKRD17	263 kDa	11.276	11.683	0.965163
ATP-binding cassette sub-family F member 2 OS=Homo sapiens OX=9606 GN=ABCF2 PE=1 SV=2	Q9UG63 (+1)	ABCF2	71 kDa	11.276	11.683	0.965163
RNA helicase OS=Homo sapiens OX=9606 GN=DDX17 PE=1 SV=1	A0A1X7SBZ2 (+2)	DDX17	80 kDa	11.939	12.413	0.961814
Lysine--tRNA ligase OS=Homo sapiens OX=9606 GN=KARS1 PE=1 SV=3	Q15046 (+1)	KARS1	68 kDa	11.939	12.413	0.961814
Enoyl-CoA hydratase OS=Homo sapiens OX=9606 GN=HADHA PE=1 SV=2	H0YFD6 (+1)	HADHA	86 kDa	11.939	12.413	0.961814
Insulin-like growth factor 2 mRNA-binding protein 2 OS=Homo sapiens OX=9606 GN=IGF2BP2 PE=1 SV=1	F8W930 (+2)	IGF2BP2	67 kDa	12.603	13.143	0.958913
Nucleolin OS=Homo sapiens OX=9606 GN=NCL PE=4 SV=1	A0A7I2V3F3 (+4)	NCL	75 kDa	25.868	27.017	0.957471
60S ribosomal protein L30 (Fragment) OS=Homo sapiens OX=9606 GN=RPL30 PE=1 SV=1	E5RI99 (+1)	RPL30	13 kDa	13.929	14.604	0.95378
Adenosylhomocysteinase OS=Homo sapiens OX=9606 GN=AHCY PE=1 SV=4	P23526	AHCY	48 kDa	14.592	15.334	0.951611
Staphylococcal nuclease domain-containing protein 1 OS=Homo sapiens OX=9606 GN=SND1 PE=1 SV=1	Q7KZF4	SND1	102 kDa	29.848	31.398	0.950634
Heterogeneous nuclear ribonucleoprotein Q OS=Homo sapiens OX=9606 GN=SYNCRIP PE=1 SV=2	O60506 (+1)	SYNCRIP	70 kDa	15.919	16.794	0.947898
Echinoderm microtubule-associated protein-like 4 OS=Homo sapiens OX=9606 GN=EML4 PE=1 SV=3	Q9HC35	EML4	109 kDa	15.919	16.794	0.947898
Double-stranded RNA-binding protein Staufen homolog 1 OS=Homo sapiens OX=9606 GN=STAU1 PE=1 SV=2	O95793 (+2)	STAU1	63 kDa	16.582	17.524	0.946245
U5 small nuclear ribonucleoprotein 200 kDa helicase OS=Homo sapiens OX=9606 GN=SNRNP200 PE=1 SV=2	O75643	SNRNP200	245 kDa	17.246	18.255	0.944727
ATP synthase subunit alpha, mitochondrial OS=Homo sapiens OX=9606 GN=ATP5F1A PE=1 SV=1	P25705	ATP5F1A	60 kDa	17.909	18.985	0.943324
Protein PRRC2A OS=Homo sapiens OX=9606 GN=PRRC2A PE=1 SV=3	P48634	PRRC2A	229 kDa	18.572	19.715	0.942024
Stress-70 protein, mitochondrial OS=Homo sapiens OX=9606 GN=HSPA9 PE=4 SV=1	A0A7I2V2G2 (+1)	HSPA9	67 kDa	25.205	27.017	0.932931
Endoplasmic reticulum chaperone BiP OS=Homo sapiens OX=9606 GN=HSPA5 PE=1 SV=2	P11021	HSPA5	72 kDa	27.195	29.207	0.931112
Heat shock protein HSP 90-alpha OS=Homo sapiens OX=9606 GN=HSP90AA1 PE=1 SV=5	P07900 (+1)	HSP90AA1	85 kDa	27.195	29.207	0.931112
Isoform 8 of Filamin-B OS=Homo sapiens OX=9606 GN=FLNB	O75369-8	FLNB	282 kDa	35.154	37.97	0.925836
T-complex protein 1 subunit epsilon OS=Homo sapiens OX=9606 GN=CCT5 PE=1 SV=1	P48643	CCT5	60 kDa	10.613	11.683	0.908414
40S ribosomal protein S20 OS=Homo sapiens OX=9606 GN=RPS20 PE=1 SV=1	P60866 (+1)	RPS20	13 kDa	10.613	11.683	0.908414
Ras GTPase-activating-like protein IQGAP1 OS=Homo sapiens OX=9606 GN=IQGAP1 PE=1 SV=1	P46940	IQGAP1	189 kDa	26.532	29.207	0.908412
Rab3 GTPase-activating protein non-catalytic subunit OS=Homo sapiens OX=9606 GN=RAB3GAP2 PE=1 SV=1	Q9H2M9	RAB3GAP2	156 kDa	2.6532	2.9207	0.908412
Coiled-coil domain-containing protein 124 OS=Homo sapiens OX=9606 GN=CCDC124 PE=1 SV=1	Q96CT7	CCDC124	26 kDa	2.6532	2.9207	0.908412
Transaldolase OS=Homo sapiens OX=9606 GN=TALDO1 PE=1 SV=2	P37837	TALDO1	38 kDa	2.6532	2.9207	0.908412
Sodium/potassium-transporting ATPase subunit beta-1 OS=Homo sapiens OX=9606 GN=ATP1B1 PE=1 SV=1	P05026 (+1)	ATP1B1	35 kDa	2.6532	2.9207	0.908412
Cytoskeleton-associated protein 2 OS=Homo sapiens OX=9606 GN=CKAP2 PE=1 SV=1	Q8WWK9 (+1)	CKAP2	77 kDa	2.6532	2.9207	0.908412
28S ribosomal protein S2, mitochondrial OS=Homo sapiens OX=9606 GN=MRPS2 PE=1 SV=1	Q9Y399	MRPS2	33 kDa	2.6532	2.9207	0.908412
General transcription factor 3C polypeptide 2 OS=Homo sapiens OX=9606 GN=GTF3C2 PE=1 SV=2	Q8WUA4	GTF3C2	101 kDa	2.6532	2.9207	0.908412
Vesicle-trafficking protein SEC22b OS=Homo sapiens OX=9606 GN=SEC22B PE=1 SV=4	O75396	SEC22B	25 kDa	2.6532	2.9207	0.908412
Eukaryotic translation initiation factor 6 OS=Homo sapiens OX=9606 GN=EIF6 PE=1 SV=1	P56537	EIF6	27 kDa	2.6532	2.9207	0.908412
V-type proton ATPase subunit OS=Homo sapiens OX=9606 GN=ATP6V0D1 PE=1 SV=1	F5GYQ1 (+3)	ATP6V0D1	45 kDa	2.6532	2.9207	0.908412
Polypeptide N-acetylgalactosaminyltransferase 6 OS=Homo sapiens OX=9606 GN=GALNT6 PE=1 SV=2	Q8NCL4	GALNT6	71 kDa	2.6532	2.9207	0.908412
Protein TMED7-TICAM2 OS=Homo sapiens OX=9606 GN=TMED7-TICAM2 PE=3 SV=1	A0A0A6YYA0 (+3)	TMED7-TICAM2	21 kDa	2.6532	2.9207	0.908412
Splicing factor U2AF 35 kDa subunit-like protein OS=Homo sapiens OX=9606 GN=U2AF1L5 PE=1 SV=1	P0DN76 (+1)	U2AF1L5	28 kDa	2.6532	2.9207	0.908412
Vacuolar protein sorting-associated protein 26A OS=Homo sapiens OX=9606 GN=VPS26A PE=1 SV=2	O75436	VPS26A	38 kDa	2.6532	2.9207	0.908412
Complex I-PDSW OS=Homo sapiens OX=9606 GN=NDUFB10 PE=1 SV=1	H3BPJ9 (+1)	NDUFB10	19 kDa	2.6532	2.9207	0.908412
Signal transducer and activator of transcription OS=Homo sapiens OX=9606 GN=STAT1 PE=1 SV=1	A0A669KB53 (+7)	STAT1	91 kDa	2.6532	2.9207	0.908412
GMP synthase [glutamine-hydrolyzing] OS=Homo sapiens OX=9606 GN=GMPS PE=1 SV=1	P49915 (+1)	GMPS	77 kDa	2.6532	2.9207	0.908412
Peroxisomal 2,4-dienoyl-CoA reductase [(3E)-enoyl-CoA-producing] OS=Homo sapiens OX=9606 GN=DECR2 PE=1 SV=1	Q4VXZ8 (+1)	DECR2	29 kDa	2.6532	2.9207	0.908412
Activating signal cointegrator 1 complex subunit 1 (Fragment) OS=Homo sapiens OX=9606 GN=ASCC1 PE=1 SV=1	H0YCB3 (+2)	ASCC1	33 kDa	2.6532	2.9207	0.908412
START domain-containing protein 10 (Fragment) OS=Homo sapiens OX=9606 GN=STARD10 PE=1 SV=1	F5H1Z6 (+2)	STARD10	29 kDa	2.6532	2.9207	0.908412
Lysophosphatidylserine lipase ABHD12 OS=Homo sapiens OX=9606 GN=ABHD12 PE=1 SV=2	Q8N2K0 (+1)	ABHD12	45 kDa	2.6532	2.9207	0.908412
Methylcrotonoyl-CoA carboxylase beta chain, mitochondrial OS=Homo sapiens OX=9606 GN=MCCC2 PE=1 SV=1	Q9HCC0	MCCC2	61 kDa	2.6532	2.9207	0.908412
Small nuclear ribonucleoprotein-associated protein N (Fragment) OS=Homo sapiens OX=9606 GN=SNRPN PE=1 SV=1	J3QLE5 (+5)	SNRPN	18 kDa	2.6532	2.9207	0.908412
CAP-Gly domain-containing linker protein 1 OS=Homo sapiens OX=9606 GN=CLIP1 PE=1 SV=2	P30622 (+2)	CLIP1	162 kDa	2.6532	2.9207	0.908412
Sterol 26-hydroxylase, mitochondrial OS=Homo sapiens OX=9606 GN=CYP27A1 PE=1 SV=1	Q02318	CYP27A1	60 kDa	2.6532	2.9207	0.908412
Xaa-Pro dipeptidase (Fragment) OS=Homo sapiens OX=9606 GN=PEPD PE=1 SV=1	A0A494C165 (+3)	PEPD	58 kDa	2.6532	2.9207	0.908412
Copine-1 OS=Homo sapiens OX=9606 GN=CPNE1 PE=1 SV=1	B0QZ18 (+2)	CPNE1	60 kDa	2.6532	2.9207	0.908412
DnaJ (Hsp40) homolog, subfamily B, member 12, isoform CRA_c OS=Homo sapiens OX=9606 GN=DNAJB12 PE=1 SV=1	J3KPS0 (+1)	DNAJB12	45 kDa	2.6532	2.9207	0.908412
Tripartite motif-containing protein 3 OS=Homo sapiens OX=9606 GN=TRIM3 PE=1 SV=1	A0A1W2PPI7 (+3)	TRIM3	76 kDa	2.6532	2.9207	0.908412
Band 4.1-like protein 2 OS=Homo sapiens OX=9606 GN=EPB41L2 PE=1 SV=1	E9PHY5 (+2)	EPB41L2	104 kDa	2.6532	2.9207	0.908412
Protein SDA1 OS=Homo sapiens OX=9606 GN=SDAD1 PE=1 SV=1	E7EW05 (+1)	SDAD1	75 kDa	2.6532	2.9207	0.908412
Histone-binding protein RBBP4 OS=Homo sapiens OX=9606 GN=RBBP4 PE=1 SV=3	Q09028 (+1)	RBBP4	48 kDa	2.6532	2.9207	0.908412
Histone-arginine methyltransferase CARM1 OS=Homo sapiens OX=9606 GN=CARM1 PE=1 SV=3	Q86X55 (+1)	CARM1	66 kDa	2.6532	2.9207	0.908412
Malonyl-CoA-acyl carrier protein transacylase, mitochondrial OS=Homo sapiens OX=9606 GN=MCAT PE=1 SV=2	Q8IVS2	MCAT	43 kDa	2.6532	2.9207	0.908412
Plexin-B2 OS=Homo sapiens OX=9606 GN=PLXNB2 PE=1 SV=3	O15031	PLXNB2	205 kDa	2.6532	2.9207	0.908412
Histone H3 OS=Homo sapiens OX=9606 GN=H3-3A PE=1 SV=1	A0A590UJJ6 (+7)	H3-3A	14 kDa	2.6532	2.9207	0.908412
Ankyrin repeat and zinc finger domain-containing protein 1 OS=Homo sapiens OX=9606 GN=ANKZF1 PE=1 SV=1	B8ZZS4 (+1)	ANKZF1	58 kDa	2.6532	2.9207	0.908412
rRNA adenine N(6)-methyltransferase OS=Homo sapiens OX=9606 GN=DIMT1 PE=1 SV=1	A0A494C0G7 (+1)	DIMT1	36 kDa	2.6532	2.9207	0.908412
Eukaryotic translation initiation factor 3 subunit I OS=Homo sapiens OX=9606 GN=EIF3I PE=4 SV=1	A0A7I2V3U3	EIF3I	36 kDa	15.919	17.524	0.908411
Eukaryotic initiation factor 4A-I OS=Homo sapiens OX=9606 GN=EIF4A1 PE=1 SV=1	P60842	EIF4A1	46 kDa	15.919	17.524	0.908411
SH2 domain-containing protein 3A OS=Homo sapiens OX=9606 GN=SH2D3A PE=1 SV=1	Q9BRG2	SH2D3A	63 kDa	3.3165	3.6509	0.908406
Cullin-1 OS=Homo sapiens OX=9606 GN=CUL1 PE=1 SV=1	A0A0C4DGX4 (+4)	CUL1	87 kDa	3.3165	3.6509	0.908406
Cell division cycle 5-like protein OS=Homo sapiens OX=9606 GN=CDC5L PE=1 SV=2	Q99459	CDC5L	92 kDa	3.3165	3.6509	0.908406
ADP-ribosylation factor 4 OS=Homo sapiens OX=9606 GN=ARF4 PE=1 SV=3	P18085	ARF4	21 kDa	3.3165	3.6509	0.908406
Guanine nucleotide-binding protein G(I)/G(S)/G(T) subunit beta-2 OS=Homo sapiens OX=9606 GN=GNB2 PE=1 SV=3	P62879	GNB2	37 kDa	3.3165	3.6509	0.908406
Very-long-chain 3-oxoacyl-CoA reductase OS=Homo sapiens OX=9606 GN=HSD17B12 PE=1 SV=2	Q53GQ0	HSD17B12	34 kDa	3.3165	3.6509	0.908406
Protein LSM14 homolog B OS=Homo sapiens OX=9606 GN=LSM14B PE=1 SV=1	Q9BX40	LSM14B	42 kDa	3.3165	3.6509	0.908406
Ribonuclease 3 OS=Homo sapiens OX=9606 GN=DROSHA PE=1 SV=2	Q9NRR4 (+2)	DROSHA	159 kDa	3.3165	3.6509	0.908406
Exocyst complex component 4 OS=Homo sapiens OX=9606 GN=EXOC4 PE=1 SV=1	Q96A65	EXOC4	111 kDa	3.3165	3.6509	0.908406
Transmembrane emp24 domain-containing protein 9 OS=Homo sapiens OX=9606 GN=TMED9 PE=1 SV=2	Q9BVK6	TMED9	27 kDa	3.3165	3.6509	0.908406
Elongation factor Ts, mitochondrial OS=Homo sapiens OX=9606 GN=TSFM PE=1 SV=2	P43897	TSFM	35 kDa	3.3165	3.6509	0.908406
E3 ubiquitin-protein ligase TRIM56 OS=Homo sapiens OX=9606 GN=TRIM56 PE=1 SV=3	Q9BRZ2	TRIM56	81 kDa	3.3165	3.6509	0.908406
Carnitine O-acetyltransferase OS=Homo sapiens OX=9606 GN=CRAT PE=1 SV=5	P43155 (+1)	CRAT	71 kDa	3.3165	3.6509	0.908406
39S ribosomal protein L13, mitochondrial (Fragment) OS=Homo sapiens OX=9606 GN=MRPL13 PE=1 SV=8	E5RJI7 (+1)	MRPL13	17 kDa	3.3165	3.6509	0.908406
Translocon-associated protein subunit delta OS=Homo sapiens OX=9606 GN=SSR4 PE=1 SV=1	P51571	SSR4	19 kDa	3.3165	3.6509	0.908406
Emerin OS=Homo sapiens OX=9606 GN=EMD PE=1 SV=1	P50402	EMD	29 kDa	3.3165	3.6509	0.908406
Immunoglobulin kappa variable 1-17 OS=Homo sapiens OX=9606 GN=IGKV1-17 PE=1 SV=2	P01599	IGKV1-17	13 kDa	3.3165	3.6509	0.908406
Regulator of chromosome condensation (Fragment) OS=Homo sapiens OX=9606 GN=RCC1 PE=1 SV=1	C9JW69 (+2)	RCC1	40 kDa	3.3165	3.6509	0.908406
Transmembrane 9 superfamily member 3 OS=Homo sapiens OX=9606 GN=TM9SF3 PE=1 SV=2	Q9HD45	TM9SF3	68 kDa	3.3165	3.6509	0.908406
Signal sequence receptor subunit alpha OS=Homo sapiens OX=9606 GN=SSR1 PE=1 SV=1	A0A3B3IRT8 (+5)	SSR1	32 kDa	3.3165	3.6509	0.908406
Midkine OS=Homo sapiens OX=9606 GN=MDK PE=1 SV=1	E9PLM6 (+2)	MDK	17 kDa	3.3165	3.6509	0.908406
Serine/threonine-protein kinase PAK 4 OS=Homo sapiens OX=9606 GN=PAK4 PE=1 SV=1	O96013	PAK4	64 kDa	3.3165	3.6509	0.908406
TRPM8 channel-associated factor 1 OS=Homo sapiens OX=9606 GN=TCAF1 PE=1 SV=3	Q9Y4C2 (+1)	TCAF1	102 kDa	3.3165	3.6509	0.908406
Radixin OS=Homo sapiens OX=9606 GN=RDX PE=1 SV=1	P35241	RDX	69 kDa	11.276	12.413	0.908402
Isoleucine--tRNA ligase, mitochondrial OS=Homo sapiens OX=9606 GN=IARS2 PE=1 SV=2	Q9NSE4	IARS2	114 kDa	7.9595	8.7622	0.908391
Structural maintenance of chromosomes protein 2 OS=Homo sapiens OX=9606 GN=SMC2 PE=1 SV=2	O95347	SMC2	136 kDa	7.9595	8.7622	0.908391
Alpha-aminoadipic semialdehyde dehydrogenase OS=Homo sapiens OX=9606 GN=ALDH7A1 PE=1 SV=1	A0A1B0GTG2 (+4)	ALDH7A1	58 kDa	7.9595	8.7622	0.908391
Basic leucine zipper and W2 domain-containing protein 2 (Fragment) OS=Homo sapiens OX=9606 GN=BZW2 PE=1 SV=1	E7ETZ4 (+1)	BZW2	47 kDa	7.9595	8.7622	0.908391
Lupus La protein OS=Homo sapiens OX=9606 GN=SSB PE=1 SV=2	P05455	SSB	47 kDa	7.9595	8.7622	0.908391
14-3-3 protein gamma OS=Homo sapiens OX=9606 GN=YWHAG PE=1 SV=2	P61981	YWHAG	28 kDa	7.9595	8.7622	0.908391
60S ribosomal protein L24 OS=Homo sapiens OX=9606 GN=RPL24 PE=1 SV=1	C9JNW5 (+2)	RPL24	18 kDa	8.6228	9.4924	0.90839
4F2 cell-surface antigen heavy chain OS=Homo sapiens OX=9606 GN=SLC3A2 PE=1 SV=1	F5GZS6 (+5)	SLC3A2	65 kDa	8.6228	9.4924	0.90839
60S ribosomal protein L12 OS=Homo sapiens OX=9606 GN=RPL12 PE=1 SV=1	P30050	RPL12	18 kDa	8.6228	9.4924	0.90839
Splicing factor 3B subunit 2 OS=Homo sapiens OX=9606 GN=SF3B2 PE=1 SV=2	Q13435	SF3B2	100 kDa	8.6228	9.4924	0.90839
Septin OS=Homo sapiens OX=9606 GN=SEPTIN11 PE=1 SV=1	D6RER5 (+3)	SEPTIN11	50 kDa	12.603	13.874	0.90839
Protein PRRC2B OS=Homo sapiens OX=9606 GN=PRRC2B PE=1 SV=2	Q5JSZ5	PRRC2B	243 kDa	12.603	13.874	0.90839
Receptor of activated protein C kinase 1 OS=Homo sapiens OX=9606 GN=RACK1 PE=1 SV=3	P63244	RACK1	35 kDa	12.603	13.874	0.90839
Sickle tail protein homolog OS=Homo sapiens OX=9606 GN=KIAA1217 PE=1 SV=2	Q5T5P2	KIAA1217	214 kDa	18.572	20.445	0.908388
60S acidic ribosomal protein P0 OS=Homo sapiens OX=9606 GN=RPLP0 PE=1 SV=1	P05388	RPLP0	34 kDa	18.572	20.445	0.908388
Y-box-binding protein 3 OS=Homo sapiens OX=9606 GN=YBX3 PE=1 SV=4	P16989	YBX3	40 kDa	18.572	20.445	0.908388
40S ribosomal protein S8 OS=Homo sapiens OX=9606 GN=RPS8 PE=1 SV=2	P62241 (+1)	RPS8	24 kDa	18.572	20.445	0.908388
17-beta-hydroxysteroid dehydrogenase 14 OS=Homo sapiens OX=9606 GN=HSD17B14 PE=1 SV=1	Q9BPX1	HSD17B14	28 kDa	13.266	14.604	0.908381
Glutaredoxin-3 OS=Homo sapiens OX=9606 GN=GLRX3 PE=1 SV=2	O76003	GLRX3	37 kDa	1.9899	2.1906	0.908381
Isoform 3 of Tudor domain-containing protein 3 OS=Homo sapiens OX=9606 GN=TDRD3	Q9H7E2-3	TDRD3	83 kDa	1.9899	2.1906	0.908381
Liprin-beta-2 OS=Homo sapiens OX=9606 GN=PPFIBP2 PE=1 SV=1	E9PP16 (+3)	PPFIBP2	81 kDa	1.9899	2.1906	0.908381
1,4-beta-N-acetylmuramidase C OS=Homo sapiens OX=9606 GN=LYZ PE=1 SV=1	A0A0B4J259 (+2)	LYZ	15 kDa	1.9899	2.1906	0.908381
Malate dehydrogenase OS=Homo sapiens OX=9606 GN=MDH1 PE=1 SV=1	A0A5K1VW95 (+4)	MDH1	39 kDa	1.9899	2.1906	0.908381
Elongation factor G, mitochondrial OS=Homo sapiens OX=9606 GN=GFM1 PE=1 SV=2	Q96RP9 (+1)	GFM1	83 kDa	1.9899	2.1906	0.908381
Zinc finger protein 787 OS=Homo sapiens OX=9606 GN=ZNF787 PE=1 SV=4	Q6DD87	ZNF787	40 kDa	1.9899	2.1906	0.908381
General transcription factor IIF subunit 1 OS=Homo sapiens OX=9606 GN=GTF2F1 PE=1 SV=2	P35269	GTF2F1	58 kDa	1.9899	2.1906	0.908381
ELKS/Rab6-interacting/CAST family member 1 OS=Homo sapiens OX=9606 GN=ERC1 PE=1 SV=1	G8JLD3 (+6)	ERC1	125 kDa	1.9899	2.1906	0.908381
RNA demethylase ALKBH5 OS=Homo sapiens OX=9606 GN=ALKBH5 PE=1 SV=2	Q6P6C2	ALKBH5	44 kDa	1.9899	2.1906	0.908381
Cyclic GMP-AMP synthase OS=Homo sapiens OX=9606 GN=CGAS PE=1 SV=2	Q8N884 (+1)	CGAS	59 kDa	1.9899	2.1906	0.908381
Importin-4 OS=Homo sapiens OX=9606 GN=IPO4 PE=1 SV=2	Q8TEX9 (+1)	IPO4	119 kDa	1.9899	2.1906	0.908381
Inactive tyrosine-protein kinase 7 OS=Homo sapiens OX=9606 GN=PTK7 PE=1 SV=2	Q13308 (+4)	PTK7	118 kDa	1.9899	2.1906	0.908381
Receptor expression-enhancing protein 6 OS=Homo sapiens OX=9606 GN=REEP6 PE=1 SV=2	Q96HR9	REEP6	23 kDa	1.9899	2.1906	0.908381
Nesprin-2 OS=Homo sapiens OX=9606 GN=SYNE2 PE=1 SV=1	A0A0A0MRE3 (+3)	SYNE2	788 kDa	1.9899	2.1906	0.908381
Suprabasin OS=Homo sapiens OX=9606 GN=SBSN PE=1 SV=2	Q6UWP8	SBSN	61 kDa	1.3266	1.4604	0.908381
Twinfilin-1 (Fragment) OS=Homo sapiens OX=9606 GN=TWF1 PE=1 SV=1	F8VS81 (+2)	TWF1	33 kDa	1.9899	2.1906	0.908381
Ribosomal protein S6 kinase OS=Homo sapiens OX=9606 GN=RPS6KA4 PE=1 SV=1	E9PJN1 (+2)	RPS6KA4	85 kDa	1.9899	2.1906	0.908381
Methionine aminopeptidase 1 OS=Homo sapiens OX=9606 GN=METAP1 PE=1 SV=2	P53582	METAP1	43 kDa	1.9899	2.1906	0.908381
Protein NipSnap homolog 1 OS=Homo sapiens OX=9606 GN=NIPSNAP1 PE=1 SV=1	Q9BPW8	NIPSNAP1	33 kDa	1.9899	2.1906	0.908381
Kinesin-like protein KIF21A (Fragment) OS=Homo sapiens OX=9606 GN=KIF21A PE=1 SV=1	A0A1B0GV47 (+5)	KIF21A	185 kDa	1.9899	2.1906	0.908381
Elongin-C (Fragment) OS=Homo sapiens OX=9606 GN=ELOC PE=1 SV=1	E5RHG8 (+1)	ELOC	10 kDa	1.9899	2.1906	0.908381
Glutathione S-transferase kappa OS=Homo sapiens OX=9606 GN=GSTK1 PE=1 SV=1	E9PFN5	GSTK1	22 kDa	1.9899	2.1906	0.908381
Peroxiredoxin-5, mitochondrial OS=Homo sapiens OX=9606 GN=PRDX5 PE=1 SV=4	P30044	PRDX5	22 kDa	1.9899	2.1906	0.908381
Melanoma inhibitory activity protein 2 OS=Homo sapiens OX=9606 GN=MIA2 PE=1 SV=1	G3V599 (+6)	MIA2	152 kDa	1.9899	2.1906	0.908381
Cathepsin L2 OS=Homo sapiens OX=9606 GN=CTSV PE=1 SV=2	O60911	CTSV	37 kDa	1.9899	2.1906	0.908381
Protein SCAF11 OS=Homo sapiens OX=9606 GN=SCAF11 PE=1 SV=1	F8VXG7 (+2)	SCAF11	143 kDa	1.9899	2.1906	0.908381
GATOR complex protein SEC13 OS=Homo sapiens OX=9606 GN=SEC13 PE=1 SV=1	A8MXL6 (+4)	SEC13	32 kDa	1.9899	2.1906	0.908381
L-2-hydroxyglutarate dehydrogenase, mitochondrial OS=Homo sapiens OX=9606 GN=L2HGDH PE=1 SV=1	C9JVN9 (+2)	L2HGDH	48 kDa	1.9899	2.1906	0.908381
Serine/threonine-protein phosphatase 4 regulatory subunit 2 OS=Homo sapiens OX=9606 GN=PPP4R2 PE=1 SV=3	Q9NY27 (+1)	PPP4R2	47 kDa	1.9899	2.1906	0.908381
28S rRNA (cytosine-C(5))-methyltransferase OS=Homo sapiens OX=9606 GN=NSUN5 PE=1 SV=2	Q96P11 (+3)	NSUN5	47 kDa	1.9899	2.1906	0.908381
Ran-specific GTPase-activating protein OS=Homo sapiens OX=9606 GN=RANBP1 PE=1 SV=1	P43487 (+1)	RANBP1	23 kDa	1.3266	1.4604	0.908381
RNA-binding protein 42 OS=Homo sapiens OX=9606 GN=RBM42 PE=1 SV=1	Q9BTD8	RBM42	50 kDa	1.9899	2.1906	0.908381
Cytochrome b-c1 complex subunit 8 OS=Homo sapiens OX=9606 GN=UQCRQ PE=1 SV=4	O14949	UQCRQ	10 kDa	1.9899	2.1906	0.908381
Exosome complex component RRP41 OS=Homo sapiens OX=9606 GN=EXOSC4 PE=1 SV=3	Q9NPD3	EXOSC4	26 kDa	1.9899	2.1906	0.908381
Protein CMSS1 (Fragment) OS=Homo sapiens OX=9606 GN=CMSS1 PE=1 SV=1	C9J384 (+2)	CMSS1	26 kDa	1.9899	2.1906	0.908381
Sterol-4-alpha-carboxylate 3-dehydrogenase, decarboxylating OS=Homo sapiens OX=9606 GN=NSDHL PE=1 SV=2	Q15738	NSDHL	42 kDa	1.9899	2.1906	0.908381
Gamma-tubulin complex component 2 OS=Homo sapiens OX=9606 GN=TUBGCP2 PE=1 SV=2	Q9BSJ2 (+1)	TUBGCP2	103 kDa	1.9899	2.1906	0.908381
Sterol carrier protein 2 OS=Homo sapiens OX=9606 GN=SCP2 PE=1 SV=2	P22307 (+5)	SCP2	59 kDa	1.9899	2.1906	0.908381
Ataxin-10 OS=Homo sapiens OX=9606 GN=ATXN10 PE=1 SV=1	Q9UBB4 (+1)	ATXN10	53 kDa	1.9899	2.1906	0.908381
Protein Red OS=Homo sapiens OX=9606 GN=IK PE=1 SV=3	Q13123	IK	66 kDa	1.9899	2.1906	0.908381
CAAX prenyl protease 1 homolog OS=Homo sapiens OX=9606 GN=ZMPSTE24 PE=1 SV=2	O75844	ZMPSTE24	55 kDa	1.9899	2.1906	0.908381
Glutamine synthetase OS=Homo sapiens OX=9606 GN=GLUL PE=1 SV=1	A0A2R8YDT1 (+1)	GLUL	57 kDa	1.9899	2.1906	0.908381
Receptor expression-enhancing protein (Fragment) OS=Homo sapiens OX=9606 GN=REEP5 PE=1 SV=1	E2QRG8 (+1)	REEP5	18 kDa	1.9899	2.1906	0.908381
Ferroptosis suppressor protein 1 OS=Homo sapiens OX=9606 GN=AIFM2 PE=1 SV=1	Q9BRQ8	AIFM2	41 kDa	1.9899	2.1906	0.908381
Mitogen-activated protein kinase kinase kinase 20 OS=Homo sapiens OX=9606 GN=MAP3K20 PE=1 SV=3	Q9NYL2	MAP3K20	91 kDa	1.9899	2.1906	0.908381
SNW domain-containing protein 1 OS=Homo sapiens OX=9606 GN=SNW1 PE=1 SV=1	G3V4X8 (+1)	SNW1	43 kDa	1.9899	2.1906	0.908381
Mortality factor 4-like protein 1 OS=Homo sapiens OX=9606 GN=MORF4L1 PE=1 SV=1	B3KTM8 (+2)	MORF4L1	40 kDa	1.9899	2.1906	0.908381
Large neutral amino acids transporter small subunit 1 OS=Homo sapiens OX=9606 GN=SLC7A5 PE=1 SV=2	Q01650	SLC7A5	55 kDa	1.9899	2.1906	0.908381
Protein transport protein Sec24A OS=Homo sapiens OX=9606 GN=SEC24A PE=1 SV=2	O95486	SEC24A	120 kDa	1.3266	1.4604	0.908381
Chloride channel, nucleotide sensitive 1A OS=Homo sapiens OX=9606 GN=CLNS1A PE=1 SV=1	E9PMI6 (+2)	CLNS1A	18 kDa	1.9899	2.1906	0.908381
Programmed cell death protein 6 OS=Homo sapiens OX=9606 GN=PDCD6 PE=1 SV=1	O75340	PDCD6	22 kDa	1.9899	2.1906	0.908381
Dynein assembly factor 5, axonemal OS=Homo sapiens OX=9606 GN=DNAAF5 PE=1 SV=4	Q86Y56	DNAAF5	94 kDa	1.9899	2.1906	0.908381
Nucleolysin TIA-1 isoform p40 OS=Homo sapiens OX=9606 GN=TIA1 PE=1 SV=1	F8W8I6 (+1)	TIA1	43 kDa	1.9899	2.1906	0.908381
Ubiquitin carboxyl-terminal hydrolase 16 OS=Homo sapiens OX=9606 GN=USP16 PE=1 SV=1	Q9Y5T5 (+2)	USP16	94 kDa	1.3266	1.4604	0.908381
Hydroxymethylglutaryl-CoA lyase, mitochondrial OS=Homo sapiens OX=9606 GN=HMGCL PE=1 SV=2	P35914	HMGCL	34 kDa	1.3266	1.4604	0.908381
N-alpha-acetyltransferase 35, NatC auxiliary subunit OS=Homo sapiens OX=9606 GN=NAA35 PE=1 SV=1	Q5VZE5	NAA35	84 kDa	1.3266	1.4604	0.908381
Epithelial splicing regulatory protein 2 OS=Homo sapiens OX=9606 GN=ESRP2 PE=1 SV=1	Q9H6T0 (+1)	ESRP2	78 kDa	1.3266	1.4604	0.908381
Carboxypeptidase D OS=Homo sapiens OX=9606 GN=CPD PE=1 SV=2	O75976 (+1)	CPD	153 kDa	1.3266	1.4604	0.908381
Mitochondrial import receptor subunit TOM40 homolog OS=Homo sapiens OX=9606 GN=TOMM40 PE=1 SV=1	O96008 (+1)	TOMM40	38 kDa	1.3266	1.4604	0.908381
Golgi integral membrane protein 4 OS=Homo sapiens OX=9606 GN=GOLIM4 PE=1 SV=1	F8W785 (+1)	GOLIM4	79 kDa	1.3266	1.4604	0.908381
Protein diaphanous homolog 3 OS=Homo sapiens OX=9606 GN=DIAPH3 PE=1 SV=4	Q9NSV4 (+4)	DIAPH3	137 kDa	1.3266	1.4604	0.908381
Tudor-interacting repair regulator protein (Fragment) OS=Homo sapiens OX=9606 GN=NUDT16L1 PE=1 SV=1	K7EIN2	NUDT16L1	22 kDa	1.3266	1.4604	0.908381
Very long-chain acyl-CoA synthetase OS=Homo sapiens OX=9606 GN=SLC27A2 PE=1 SV=2	O14975 (+1)	SLC27A2	70 kDa	1.3266	1.4604	0.908381
Multifunctional methyltransferase subunit TRM112-like protein OS=Homo sapiens OX=9606 GN=TRMT112 PE=1 SV=1	F5GX77 (+2)	TRMT112	12 kDa	1.3266	1.4604	0.908381
ADP-ribosylation factor-like protein 1 OS=Homo sapiens OX=9606 GN=ARL1 PE=1 SV=1	F8VYN9 (+2)	ARL1	22 kDa	1.3266	1.4604	0.908381
Prostaglandin E synthase 2 OS=Homo sapiens OX=9606 GN=PTGES2 PE=4 SV=1	A0A7I2V5X6 (+1)	PTGES2	34 kDa	1.3266	1.4604	0.908381
Pre-mRNA-processing factor 40 homolog A OS=Homo sapiens OX=9606 GN=PRPF40A PE=4 SV=1	A0A7N4I394 (+3)	PRPF40A	112 kDa	1.3266	1.4604	0.908381
Ras-related protein R-Ras2 (Fragment) OS=Homo sapiens OX=9606 GN=RRAS2 PE=1 SV=1	E9PK85 (+4)	RRAS2	20 kDa	1.3266	1.4604	0.908381
Proteasome subunit beta type-4 OS=Homo sapiens OX=9606 GN=PSMB4 PE=1 SV=4	P28070	PSMB4	29 kDa	1.3266	1.4604	0.908381
Microsomal glutathione S-transferase 1 OS=Homo sapiens OX=9606 GN=MGST1 PE=1 SV=1	P10620	MGST1	18 kDa	1.3266	1.4604	0.908381
Carbonyl reductase [NADPH] 3 OS=Homo sapiens OX=9606 GN=CBR3 PE=1 SV=3	O75828	CBR3	31 kDa	1.3266	1.4604	0.908381
AP-3 complex subunit sigma-1 OS=Homo sapiens OX=9606 GN=AP3S1 PE=1 SV=1	Q92572	AP3S1	22 kDa	1.3266	1.4604	0.908381
Cytochrome b-c1 complex subunit 9 OS=Homo sapiens OX=9606 GN=UQCR10 PE=1 SV=3	Q9UDW1	UQCR10	7 kDa	1.3266	1.4604	0.908381
NADH dehydrogenase [ubiquinone] iron-sulfur protein 3, mitochondrial OS=Homo sapiens OX=9606 GN=NDUFS3 PE=1 SV=1	O75489	NDUFS3	30 kDa	1.3266	1.4604	0.908381
Very-long-chain (3R)-3-hydroxyacyl-CoA dehydratase OS=Homo sapiens OX=9606 GN=HACD3 PE=1 SV=1	H3BPZ1 (+2)	HACD3	40 kDa	1.3266	1.4604	0.908381
COP9 signalosome complex subunit 4 OS=Homo sapiens OX=9606 GN=COPS4 PE=1 SV=1	D6RAX7 (+2)	COPS4	48 kDa	1.3266	1.4604	0.908381
Segment polarity protein dishevelled homolog DVL-2 OS=Homo sapiens OX=9606 GN=DVL2 PE=1 SV=1	I3L2N2 (+1)	DVL2	78 kDa	1.3266	1.4604	0.908381
Vacuolar protein sorting-associated protein 51 homolog OS=Homo sapiens OX=9606 GN=VPS51 PE=1 SV=2	Q9UID3 (+1)	VPS51	86 kDa	1.3266	1.4604	0.908381
High mobility group protein B3 (Fragment) OS=Homo sapiens OX=9606 GN=HMGB3 PE=1 SV=1	E7EQU1 (+3)	HMGB3	22 kDa	1.3266	1.4604	0.908381
Microsomal glutathione S-transferase 3 OS=Homo sapiens OX=9606 GN=MGST3 PE=1 SV=1	O14880 (+1)	MGST3	17 kDa	1.3266	1.4604	0.908381
ARHGAP12 protein OS=Homo sapiens OX=9606 GN=ARHGAP12 PE=1 SV=1	Q1RLN5 (+4)	ARHGAP12	91 kDa	1.3266	1.4604	0.908381
cAMP-dependent protein kinase type I-alpha regulatory subunit (Fragment) OS=Homo sapiens OX=9606 GN=PRKAR1A PE=1 SV=1	K7EM13	PRKAR1A	17 kDa	1.3266	1.4604	0.908381
Cleavage stimulation factor subunit 1 OS=Homo sapiens OX=9606 GN=CSTF1 PE=1 SV=1	Q05048	CSTF1	48 kDa	1.3266	1.4604	0.908381
Hsp90 co-chaperone Cdc37 (Fragment) OS=Homo sapiens OX=9606 GN=CDC37 PE=1 SV=1	K7EKQ2 (+1)	CDC37	42 kDa	1.3266	1.4604	0.908381
59 kDa serine/threonine-protein kinase OS=Homo sapiens OX=9606 GN=ILK PE=1 SV=1	A0A0A0MTH3 (+1)	ILK	55 kDa	1.3266	1.4604	0.908381
Transmembrane protein 245 OS=Homo sapiens OX=9606 GN=TMEM245 PE=1 SV=3	Q9H330	TMEM245	97 kDa	1.3266	1.4604	0.908381
Mitochondrial mRNA pseudouridine synthase RPUSD3 OS=Homo sapiens OX=9606 GN=RPUSD3 PE=1 SV=3	Q6P087 (+1)	RPUSD3	38 kDa	1.3266	1.4604	0.908381
RISC-loading complex subunit TARBP2 OS=Homo sapiens OX=9606 GN=TARBP2 PE=1 SV=3	Q15633 (+1)	TARBP2	39 kDa	1.3266	1.4604	0.908381
Interferon-related developmental regulator 1 OS=Homo sapiens OX=9606 GN=IFRD1 PE=3 SV=1	A0A6Q8PH75 (+2)	IFRD1	38 kDa	1.3266	1.4604	0.908381
Fructosamine-3-kinase OS=Homo sapiens OX=9606 GN=FN3K PE=1 SV=1	Q9H479	FN3K	35 kDa	1.3266	1.4604	0.908381
Helicase-like transcription factor OS=Homo sapiens OX=9606 GN=HLTF PE=1 SV=1	A0A0C4DGA6 (+2)	HLTF	114 kDa	1.3266	1.4604	0.908381
BUD13 homolog OS=Homo sapiens OX=9606 GN=BUD13 PE=1 SV=1	Q9BRD0	BUD13	71 kDa	1.3266	1.4604	0.908381
ADP-ribosylation factor-like protein 15 OS=Homo sapiens OX=9606 GN=ARL15 PE=1 SV=1	A0A087WUW9 (+1)	ARL15	23 kDa	1.3266	1.4604	0.908381
Partitioning defective 6 homolog beta OS=Homo sapiens OX=9606 GN=PARD6B PE=1 SV=1	Q9BYG5	PARD6B	41 kDa	1.3266	1.4604	0.908381
Receptor expression-enhancing protein OS=Homo sapiens OX=9606 GN=REEP4 PE=1 SV=1	E5RGS2 (+2)	REEP4	28 kDa	1.3266	1.4604	0.908381
39S ribosomal protein L46, mitochondrial OS=Homo sapiens OX=9606 GN=MRPL46 PE=1 SV=1	Q9H2W6	MRPL46	32 kDa	1.3266	1.4604	0.908381
V-type proton ATPase subunit S1 OS=Homo sapiens OX=9606 GN=ATP6AP1 PE=1 SV=2	Q15904	ATP6AP1	52 kDa	1.3266	1.4604	0.908381
AP-1 complex subunit mu-1 OS=Homo sapiens OX=9606 GN=AP1M1 PE=1 SV=1	E7ENJ6 (+2)	AP1M1	43 kDa	1.3266	1.4604	0.908381
Signal sequence receptor subunit gamma OS=Homo sapiens OX=9606 GN=SSR3 PE=1 SV=1	C9JA28 (+2)	SSR3	20 kDa	1.3266	1.4604	0.908381
Retinol dehydrogenase 14 OS=Homo sapiens OX=9606 GN=RDH14 PE=1 SV=1	Q9HBH5	RDH14	37 kDa	1.3266	1.4604	0.908381
Rho guanine nucleotide exchange factor 1 OS=Homo sapiens OX=9606 GN=ARHGEF1 PE=1 SV=1	M0QZR4 (+3)	ARHGEF1	108 kDa	1.3266	1.4604	0.908381
mRNA export factor OS=Homo sapiens OX=9606 GN=RAE1 PE=1 SV=1	P78406	RAE1	41 kDa	1.3266	1.4604	0.908381
ADP-ribosylation factor GTPase-activating protein 3 OS=Homo sapiens OX=9606 GN=ARFGAP3 PE=1 SV=1	Q9NP61 (+1)	ARFGAP3	57 kDa	1.3266	1.4604	0.908381
Dolichyl-diphosphooligosaccharide--protein glycosyltransferase subunit MAGT1 OS=Homo sapiens OX=9606 GN=MAGT1 PE=1 SV=1	A0A087WU53 (+1)	MAGT1	42 kDa	1.3266	1.4604	0.908381
Trans-Golgi network integral membrane protein 2 OS=Homo sapiens OX=9606 GN=TGOLN2 PE=1 SV=1	A0A5F9UY30 (+6)	TGOLN2	48 kDa	1.3266	1.4604	0.908381
Polycystin-1 (Fragment) OS=Homo sapiens OX=9606 GN=PKD1 PE=1 SV=1	H3BV77	PKD1	67 kDa	1.3266	1.4604	0.908381
Ribosomal protein S6 kinase beta-2 OS=Homo sapiens OX=9606 GN=RPS6KB2 PE=1 SV=2	Q9UBS0	RPS6KB2	53 kDa	1.3266	1.4604	0.908381
RNA helicase aquarius OS=Homo sapiens OX=9606 GN=AQR PE=1 SV=4	O60306	AQR	171 kDa	1.3266	1.4604	0.908381
Cancer-related nucleoside-triphosphatase OS=Homo sapiens OX=9606 GN=NTPCR PE=1 SV=1	Q9BSD7	NTPCR	21 kDa	1.3266	1.4604	0.908381
Zinc finger CCCH domain-containing protein 7B OS=Homo sapiens OX=9606 GN=ZC3H7B PE=1 SV=2	Q9UGR2	ZC3H7B	110 kDa	1.3266	1.4604	0.908381
Short/branched chain specific acyl-CoA dehydrogenase, mitochondrial OS=Homo sapiens OX=9606 GN=ACADSB PE=1 SV=1	P45954	ACADSB	47 kDa	1.3266	1.4604	0.908381
Treacle protein (Fragment) OS=Homo sapiens OX=9606 GN=TCOF1 PE=1 SV=1	A0A3B3IS06 (+8)	TCOF1	139 kDa	1.3266	1.4604	0.908381
Guanine nucleotide-binding protein-like 1 OS=Homo sapiens OX=9606 GN=GNL1 PE=1 SV=2	P36915	GNL1	69 kDa	1.3266	1.4604	0.908381
E3 ubiquitin-protein ligase synoviolin OS=Homo sapiens OX=9606 GN=SYVN1 PE=1 SV=2	Q86TM6 (+2)	SYVN1	68 kDa	1.3266	1.4604	0.908381
Structural maintenance of chromosomes protein 1B OS=Homo sapiens OX=9606 GN=SMC1B PE=2 SV=2	Q8NDV3 (+2)	SMC1B	144 kDa	1.3266	1.4604	0.908381
Torsin-1A-interacting protein 1 OS=Homo sapiens OX=9606 GN=TOR1AIP1 PE=1 SV=1	A0A0A0MSK5 (+1)	TOR1AIP1	52 kDa	1.3266	1.4604	0.908381
Heterogeneous nuclear ribonucleoprotein U-like protein 1 OS=Homo sapiens OX=9606 GN=HNRNPUL1 PE=1 SV=2	Q9BUJ2 (+1)	HNRNPUL1	96 kDa	7.2962	8.0321	0.90838
DnaJ homolog subfamily C member 2 OS=Homo sapiens OX=9606 GN=DNAJC2 PE=1 SV=4	Q99543	DNAJC2	72 kDa	7.2962	8.0321	0.90838
Protein RCC2 OS=Homo sapiens OX=9606 GN=RCC2 PE=1 SV=2	Q9P258	RCC2	56 kDa	7.2962	8.0321	0.90838
Zinc finger CCCH domain-containing protein 7A OS=Homo sapiens OX=9606 GN=ZC3H7A PE=1 SV=1	Q8IWR0	ZC3H7A	111 kDa	6.6329	7.3019	0.90838
Hyaluronan mediated motility receptor OS=Homo sapiens OX=9606 GN=HMMR PE=1 SV=2	O75330 (+2)	HMMR	84 kDa	6.6329	7.3019	0.90838
Ras-related protein Rab-5C OS=Homo sapiens OX=9606 GN=RAB5C PE=1 SV=2	P51148 (+1)	RAB5C	23 kDa	6.6329	7.3019	0.90838
3-hydroxyacyl-CoA dehydrogenase type-2 OS=Homo sapiens OX=9606 GN=HSD17B10 PE=1 SV=3	Q99714	HSD17B10	27 kDa	6.6329	7.3019	0.90838
GTP-binding protein SAR1a OS=Homo sapiens OX=9606 GN=SAR1A PE=1 SV=1	Q9NR31	SAR1A	22 kDa	6.6329	7.3019	0.90838
40S ribosomal protein S15 OS=Homo sapiens OX=9606 GN=RPS15 PE=1 SV=1	A0A0B4J2B4	RPS15	14 kDa	6.6329	7.3019	0.90838
YTH domain-containing family protein 2 OS=Homo sapiens OX=9606 GN=YTHDF2 PE=1 SV=2	Q9Y5A9 (+1)	YTHDF2	62 kDa	6.6329	7.3019	0.90838
Peroxisomal bifunctional enzyme OS=Homo sapiens OX=9606 GN=EHHADH PE=1 SV=3	Q08426	EHHADH	79 kDa	5.9696	6.5717	0.90838
General transcription factor 3C polypeptide 4 OS=Homo sapiens OX=9606 GN=GTF3C4 PE=1 SV=2	Q9UKN8	GTF3C4	92 kDa	5.9696	6.5717	0.90838
Sorting nexin-2 OS=Homo sapiens OX=9606 GN=SNX2 PE=1 SV=2	O60749 (+1)	SNX2	58 kDa	5.9696	6.5717	0.90838
Transketolase OS=Homo sapiens OX=9606 GN=TKT PE=1 SV=3	P29401 (+1)	TKT	68 kDa	5.9696	6.5717	0.90838
Double-stranded RNA-binding protein Staufen homolog 2 OS=Homo sapiens OX=9606 GN=STAU2 PE=1 SV=1	E7EPX0 (+5)	STAU2	54 kDa	5.9696	6.5717	0.90838
Mitogen-activated protein kinase kinase kinase 4 OS=Homo sapiens OX=9606 GN=MAP3K4 PE=1 SV=1	F5H538 (+3)	MAP3K4	181 kDa	5.9696	6.5717	0.90838
Pre-mRNA-processing factor 6 OS=Homo sapiens OX=9606 GN=PRPF6 PE=1 SV=1	O94906	PRPF6	107 kDa	5.9696	6.5717	0.90838
Vesicle-associated membrane protein-associated protein B/C OS=Homo sapiens OX=9606 GN=VAPB PE=1 SV=3	O95292	VAPB	27 kDa	5.9696	6.5717	0.90838
Splicing factor U2AF 65 kDa subunit OS=Homo sapiens OX=9606 GN=U2AF2 PE=1 SV=4	P26368 (+1)	U2AF2	54 kDa	5.9696	6.5717	0.90838
Isoform 1 of Voltage-dependent anion-selective channel protein 2 OS=Homo sapiens OX=9606 GN=VDAC2	P45880-1	VDAC2	33 kDa	5.9696	6.5717	0.90838
60S ribosomal protein L11 OS=Homo sapiens OX=9606 GN=RPL11 PE=1 SV=2	P62913 (+1)	RPL11	20 kDa	5.9696	6.5717	0.90838
182 kDa tankyrase-1-binding protein OS=Homo sapiens OX=9606 GN=TNKS1BP1 PE=1 SV=4	Q9C0C2	TNKS1BP1	182 kDa	5.9696	6.5717	0.90838
Fragile X mental retardation syndrome-related protein 2 OS=Homo sapiens OX=9606 GN=FXR2 PE=1 SV=2	P51116	FXR2	74 kDa	5.9696	6.5717	0.90838
Keratin, type I cytoskeletal 18 OS=Homo sapiens OX=9606 GN=KRT18 PE=1 SV=1	F8VZY9 (+1)	KRT18	44 kDa	5.3063	5.8415	0.90838
DNA mismatch repair protein OS=Homo sapiens OX=9606 GN=MSH6 PE=1 SV=1	A0A494C0M1 (+1)	MSH6	143 kDa	5.3063	5.8415	0.90838
Phosphatidylinositol-3-phosphatase SAC1 OS=Homo sapiens OX=9606 GN=SACM1L PE=1 SV=1	A0A5F9ZHN7 (+1)	SACM1L	69 kDa	5.3063	5.8415	0.90838
Probable ubiquitin carboxyl-terminal hydrolase FAF-X OS=Homo sapiens OX=9606 GN=USP9X PE=1 SV=4	Q93008 (+1)	USP9X	290 kDa	5.3063	5.8415	0.90838
Nascent polypeptide-associated complex subunit alpha, muscle-specific form OS=Homo sapiens OX=9606 GN=NACA PE=1 SV=1	E9PAV3	NACA	205 kDa	5.3063	5.8415	0.90838
Protein arginine N-methyltransferase 1 OS=Homo sapiens OX=9606 GN=PRMT1 PE=1 SV=1	E9PKG1 (+3)	PRMT1	38 kDa	5.3063	5.8415	0.90838
Centrosomal protein 43 OS=Homo sapiens OX=9606 GN=CEP43 PE=1 SV=1	O95684 (+1)	CEP43	43 kDa	5.3063	5.8415	0.90838
Transcription factor A, mitochondrial OS=Homo sapiens OX=9606 GN=TFAM PE=1 SV=1	Q00059	TFAM	29 kDa	5.3063	5.8415	0.90838
Methylmalonate-semialdehyde dehydrogenase [acylating], mitochondrial OS=Homo sapiens OX=9606 GN=ALDH6A1 PE=1 SV=2	Q02252 (+1)	ALDH6A1	58 kDa	5.3063	5.8415	0.90838
Unconventional myosin-Ie OS=Homo sapiens OX=9606 GN=MYO1E PE=1 SV=2	Q12965	MYO1E	127 kDa	5.3063	5.8415	0.90838
Tetratricopeptide repeat protein 37 OS=Homo sapiens OX=9606 GN=TTC37 PE=1 SV=1	Q6PGP7	TTC37	175 kDa	5.3063	5.8415	0.90838
Eukaryotic translation initiation factor 3 subunit M OS=Homo sapiens OX=9606 GN=EIF3M PE=1 SV=1	Q7L2H7	EIF3M	43 kDa	5.3063	5.8415	0.90838
DNA-binding protein SMUBP-2 OS=Homo sapiens OX=9606 GN=IGHMBP2 PE=1 SV=3	P38935	IGHMBP2	109 kDa	4.643	5.1113	0.908379
Interferon-induced, double-stranded RNA-activated protein kinase OS=Homo sapiens OX=9606 GN=EIF2AK2 PE=1 SV=2	P19525	EIF2AK2	62 kDa	4.643	5.1113	0.908379
Ribosome maturation protein SBDS OS=Homo sapiens OX=9606 GN=SBDS PE=1 SV=1	A0A087X020 (+1)	SBDS	29 kDa	4.643	5.1113	0.908379
DNA helicase OS=Homo sapiens OX=9606 GN=CHD4 PE=1 SV=1	A0A0C4DGG9 (+14)	CHD4	220 kDa	4.643	5.1113	0.908379
Alanine--tRNA ligase OS=Homo sapiens OX=9606 GN=AARS1 PE=1 SV=1	A0A6Q8PF33 (+6)	AARS1	106 kDa	4.643	5.1113	0.908379
Interferon-inducible double-stranded RNA-dependent protein kinase activator A OS=Homo sapiens OX=9606 GN=PRKRA PE=4 SV=1	A0A7I2V5H3 (+2)	PRKRA	22 kDa	4.643	5.1113	0.908379
Ubiquitin carboxyl-terminal hydrolase OS=Homo sapiens OX=9606 GN=USP14 PE=1 SV=2	A6NJA2 (+3)	USP14	51 kDa	4.643	5.1113	0.908379
Actin-related protein 2/3 complex subunit 2 OS=Homo sapiens OX=9606 GN=ARPC2 PE=1 SV=1	O15144	ARPC2	34 kDa	4.643	5.1113	0.908379
Isoform 3 of Nucleoside diphosphate kinase B OS=Homo sapiens OX=9606 GN=NME2	P22392-2 (+1)	NME2	30 kDa	4.643	5.1113	0.908379
Stomatin OS=Homo sapiens OX=9606 GN=STOM PE=1 SV=3	P27105	STOM	32 kDa	4.643	5.1113	0.908379
DnaJ homolog subfamily B member 11 OS=Homo sapiens OX=9606 GN=DNAJB11 PE=1 SV=1	Q9UBS4	DNAJB11	41 kDa	4.643	5.1113	0.908379
High mobility group protein HMGI-C OS=Homo sapiens OX=9606 GN=HMGA2 PE=1 SV=1	P52926	HMGA2	12 kDa	4.643	5.1113	0.908379
Filaggrin-2 OS=Homo sapiens OX=9606 GN=FLG2 PE=1 SV=1	Q5D862	FLG2	248 kDa	3.9797	4.3811	0.908379
Polyribonucleotide nucleotidyltransferase 1, mitochondrial OS=Homo sapiens OX=9606 GN=PNPT1 PE=1 SV=2	Q8TCS8	PNPT1	86 kDa	3.9797	4.3811	0.908379
Pannexin-1 OS=Homo sapiens OX=9606 GN=PANX1 PE=1 SV=4	Q96RD7	PANX1	48 kDa	3.9797	4.3811	0.908379
Adenylyl cyclase-associated protein 1 OS=Homo sapiens OX=9606 GN=CAP1 PE=1 SV=5	Q01518 (+1)	CAP1	52 kDa	3.9797	4.3811	0.908379
Eukaryotic translation initiation factor 1A, X-chromosomal OS=Homo sapiens OX=9606 GN=EIF1AX PE=1 SV=2	P47813	EIF1AX	16 kDa	3.9797	4.3811	0.908379
Transcription elongation factor A protein 1 OS=Homo sapiens OX=9606 GN=TCEA1 PE=1 SV=1	A0A1W2PPZ5 (+1)	TCEA1	34 kDa	3.9797	4.3811	0.908379
Protein transport protein SEC23 OS=Homo sapiens OX=9606 GN=SEC23A PE=1 SV=1	F5H365 (+1)	SEC23A	83 kDa	3.9797	4.3811	0.908379
2-hydroxyacyl-CoA lyase 2 OS=Homo sapiens OX=9606 GN=ILVBL PE=1 SV=2	A1L0T0	ILVBL	68 kDa	3.9797	4.3811	0.908379
Kanadaptin OS=Homo sapiens OX=9606 GN=SLC4A1AP PE=1 SV=1	A0A087X0M4 (+1)	SLC4A1AP	83 kDa	3.9797	4.3811	0.908379
26S proteasome non-ATPase regulatory subunit 12 OS=Homo sapiens OX=9606 GN=PSMD12 PE=1 SV=3	O00232	PSMD12	53 kDa	3.9797	4.3811	0.908379
Dickkopf-related protein 1 OS=Homo sapiens OX=9606 GN=DKK1 PE=1 SV=1	O94907	DKK1	29 kDa	3.9797	4.3811	0.908379
ATP synthase F(0) complex subunit B1, mitochondrial OS=Homo sapiens OX=9606 GN=ATP5PB PE=1 SV=2	P24539 (+1)	ATP5PB	29 kDa	3.9797	4.3811	0.908379
Heterogeneous nuclear ribonucleoprotein H3 OS=Homo sapiens OX=9606 GN=HNRNPH3 PE=1 SV=2	P31942 (+1)	HNRNPH3	37 kDa	3.9797	4.3811	0.908379
Peptidyl-prolyl cis-trans isomerase A OS=Homo sapiens OX=9606 GN=PPIA PE=1 SV=2	P62937	PPIA	18 kDa	3.9797	4.3811	0.908379
Aspartyl/asparaginyl beta-hydroxylase OS=Homo sapiens OX=9606 GN=ASPH PE=1 SV=3	Q12797	ASPH	86 kDa	3.9797	4.3811	0.908379
tRNA methyltransferase 10 homolog C OS=Homo sapiens OX=9606 GN=TRMT10C PE=1 SV=2	Q7L0Y3	TRMT10C	47 kDa	3.9797	4.3811	0.908379
DnaJ homolog subfamily C member 10 OS=Homo sapiens OX=9606 GN=DNAJC10 PE=1 SV=2	Q8IXB1	DNAJC10	91 kDa	3.9797	4.3811	0.908379
Oxidoreductase HTATIP2 OS=Homo sapiens OX=9606 GN=HTATIP2 PE=1 SV=2	Q9BUP3 (+1)	HTATIP2	27 kDa	3.9797	4.3811	0.908379
Selenocysteine-specific elongation factor OS=Homo sapiens OX=9606 GN=EEFSEC PE=1 SV=4	P57772	EEFSEC	65 kDa	3.9797	4.3811	0.908379
Medium-chain acyl-CoA ligase ACSF2, mitochondrial OS=Homo sapiens OX=9606 GN=ACSF2 PE=1 SV=1	E9PF16 (+3)	ACSF2	64 kDa	3.9797	4.3811	0.908379
Glycerol-3-phosphate dehydrogenase, mitochondrial OS=Homo sapiens OX=9606 GN=GPD2 PE=1 SV=3	P43304	GPD2	81 kDa	3.9797	4.3811	0.908379
Plakophilin-2 OS=Homo sapiens OX=9606 GN=PKP2 PE=1 SV=2	Q99959 (+1)	PKP2	97 kDa	3.9797	4.3811	0.908379
Ribosome biogenesis protein BMS1 homolog OS=Homo sapiens OX=9606 GN=BMS1 PE=1 SV=1	Q14692	BMS1	146 kDa	3.9797	4.3811	0.908379
Cytoplasmic dynein 1 intermediate chain 2 (Fragment) OS=Homo sapiens OX=9606 GN=DYNC1I2 PE=1 SV=1	E7EQL5 (+6)	DYNC1I2	35 kDa	3.9797	4.3811	0.908379
Protein FAM98A OS=Homo sapiens OX=9606 GN=FAM98A PE=1 SV=1	E9PH82 (+1)	FAM98A	34 kDa	3.9797	4.3811	0.908379
Hepatoma-derived growth factor OS=Homo sapiens OX=9606 GN=HDGF PE=1 SV=1	P51858	HDGF	27 kDa	3.9797	4.3811	0.908379
26S proteasome regulatory subunit 4 OS=Homo sapiens OX=9606 GN=PSMC1 PE=1 SV=1	P62191 (+1)	PSMC1	49 kDa	3.9797	4.3811	0.908379
Melanoma-associated antigen D1 OS=Homo sapiens OX=9606 GN=MAGED1 PE=1 SV=3	Q9Y5V3 (+1)	MAGED1	86 kDa	3.9797	4.3811	0.908379
DNA-dependent protein kinase catalytic subunit OS=Homo sapiens OX=9606 GN=PRKDC PE=1 SV=3	P78527	PRKDC	469 kDa	55.716	61.336	0.908374
40S ribosomal protein S3a OS=Homo sapiens OX=9606 GN=RPS3A PE=1 SV=2	P61247	RPS3A	30 kDa	27.858	30.668	0.908374
RNA helicase OS=Homo sapiens OX=9606 GN=DDX27 PE=1 SV=1	B7Z6D5 (+1)	DDX27	87 kDa	9.9494	10.953	0.908372
Heterogeneous nuclear ribonucleoprotein A3 OS=Homo sapiens OX=9606 GN=HNRNPA3 PE=4 SV=1	A0A7I2V2R3 (+4)	HNRNPA3	35 kDa	9.9494	10.953	0.908372
60S ribosomal protein L23a OS=Homo sapiens OX=9606 GN=RPL23A PE=1 SV=1	A8MUS3 (+4)	RPL23A	22 kDa	9.9494	10.953	0.908372
Protein transport protein Sec31A OS=Homo sapiens OX=9606 GN=SEC31A PE=1 SV=1	D6REX3 (+8)	SEC31A	136 kDa	9.9494	10.953	0.908372
Long-chain-fatty-acid--CoA ligase 4 OS=Homo sapiens OX=9606 GN=ACSL4 PE=1 SV=2	O60488 (+1)	ACSL4	79 kDa	9.9494	10.953	0.908372
40S ribosomal protein S18 OS=Homo sapiens OX=9606 GN=RPS18 PE=1 SV=3	P62269	RPS18	18 kDa	21.225	23.366	0.908371
Heterogeneous nuclear ribonucleoproteins C1/C2 OS=Homo sapiens OX=9606 GN=HNRNPC PE=1 SV=1	B2R5W2 (+4)	HNRNPC	32 kDa	14.592	16.064	0.908367
E3 ubiquitin/ISG15 ligase TRIM25 OS=Homo sapiens OX=9606 GN=TRIM25 PE=1 SV=2	Q14258	TRIM25	71 kDa	16.582	18.255	0.908354
Prohibitin-2 OS=Homo sapiens OX=9606 GN=PHB2 PE=1 SV=2	Q99623	PHB2	33 kDa	9.2861	10.223	0.908354
L-lactate dehydrogenase OS=Homo sapiens OX=9606 GN=LDHB PE=1 SV=1	A0A5F9ZHM4 (+1)	LDHB	37 kDa	9.2861	10.223	0.908354
RNA cytosine C(5)-methyltransferase NSUN2 OS=Homo sapiens OX=9606 GN=NSUN2 PE=1 SV=2	Q08J23	NSUN2	86 kDa	9.2861	10.223	0.908354
Eukaryotic translation initiation factor 4 gamma 1 OS=Homo sapiens OX=9606 GN=EIF4G1 PE=1 SV=1	E7EUU4 (+1)	EIF4G1	172 kDa	39.797	44.541	0.893491
Heat shock cognate 71 kDa protein OS=Homo sapiens OX=9606 GN=HSPA8 PE=1 SV=1	P11142	HSPA8	71 kDa	36.481	40.89	0.892174
Perilipin-2 OS=Homo sapiens OX=9606 GN=PLIN2 PE=1 SV=2	Q99541	PLIN2	48 kDa	27.195	30.668	0.886755
Transitional endoplasmic reticulum ATPase OS=Homo sapiens OX=9606 GN=VCP PE=1 SV=4	P55072	VCP	89 kDa	25.205	28.477	0.8851
Serine/threonine-protein kinase MRCK gamma OS=Homo sapiens OX=9606 GN=CDC42BPG PE=1 SV=2	Q6DT37	CDC42BPG	172 kDa	25.205	28.477	0.8851
Ataxin-2-like protein OS=Homo sapiens OX=9606 GN=ATXN2L PE=1 SV=2	Q8WWM7	ATXN2L	113 kDa	24.542	27.747	0.884492
Activating signal cointegrator 1 complex subunit 3 OS=Homo sapiens OX=9606 GN=ASCC3 PE=1 SV=3	Q8N3C0	ASCC3	251 kDa	23.878	27.017	0.883814
Y-box-binding protein 1 OS=Homo sapiens OX=9606 GN=YBX1 PE=1 SV=3	P67809	YBX1	36 kDa	23.878	27.017	0.883814
Isoform 1 of Fibronectin OS=Homo sapiens OX=9606 GN=FN1	P02751-1 (+2)	FN1	263 kDa	21.225	24.096	0.880852
Polyadenylate-binding protein 1 OS=Homo sapiens OX=9606 GN=PABPC1 PE=1 SV=2	P11940	PABPC1	71 kDa	37.808	43.081	0.877603
Proliferation-associated protein 2G4 OS=Homo sapiens OX=9606 GN=PA2G4 PE=1 SV=3	Q9UQ80	PA2G4	44 kDa	16.582	18.985	0.873426
Heat shock 70 kDa protein 1B OS=Homo sapiens OX=9606 GN=HSPA1B PE=1 SV=1	A0A0G2JIW1 (+2)	HSPA1B	70 kDa	15.256	17.524	0.870577
40S ribosomal protein S19 OS=Homo sapiens OX=9606 GN=RPS19 PE=1 SV=2	P39019	RPS19	16 kDa	15.256	17.524	0.870577
Isoform 3 of Polyadenylate-binding protein 4 OS=Homo sapiens OX=9606 GN=PABPC4	Q13310-3	PABPC4	72 kDa	26.532	30.668	0.865136
Leucine-rich repeat-containing protein 47 OS=Homo sapiens OX=9606 GN=LRRC47 PE=1 SV=1	Q8N1G4	LRRC47	63 kDa	13.266	15.334	0.865136
DEAD box protein 5 OS=Homo sapiens OX=9606 GN=DDX5 PE=1 SV=1	J3KTA4 (+2)	DDX5	69 kDa	13.266	15.334	0.865136
Heat shock protein HSP 90-beta OS=Homo sapiens OX=9606 GN=HSP90AB1 PE=1 SV=4	P08238	HSP90AB1	83 kDa	25.868	29.938	0.864052
40S ribosomal protein S6 OS=Homo sapiens OX=9606 GN=RPS6 PE=1 SV=1	P62753	RPS6	29 kDa	12.603	14.604	0.862983
Actin, cytoplasmic 1 OS=Homo sapiens OX=9606 GN=ACTB PE=1 SV=1	P60709 (+1)	ACTB	42 kDa	23.878	27.747	0.860562
Catenin alpha-1 OS=Homo sapiens OX=9606 GN=CTNNA1 PE=1 SV=1	P35221 (+1)	CTNNA1	100 kDa	11.939	13.874	0.86053
60S ribosomal protein L7 OS=Homo sapiens OX=9606 GN=RPL7 PE=1 SV=1	P18124	RPL7	29 kDa	23.215	27.017	0.859274
Eukaryotic translation initiation factor 3 subunit B OS=Homo sapiens OX=9606 GN=EIF3B PE=1 SV=3	P55884 (+1)	EIF3B	92 kDa	23.215	27.017	0.859274
Centrosome-associated protein 350 OS=Homo sapiens OX=9606 GN=CEP350 PE=1 SV=1	Q5VT06	CEP350	351 kDa	11.276	13.143	0.857947
40S ribosomal protein S3 OS=Homo sapiens OX=9606 GN=RPS3 PE=1 SV=2	P23396	RPS3	27 kDa	33.165	38.7	0.856977
Eukaryotic translation initiation factor 4 gamma 2 (Fragment) OS=Homo sapiens OX=9606 GN=EIF4G2 PE=1 SV=1	D3DQV9 (+1)	EIF4G2	102 kDa	21.889	25.557	0.856478
High density lipoprotein binding protein (Vigilin), isoform CRA_a OS=Homo sapiens OX=9606 GN=HDLBP PE=1 SV=1	A0A024R4E5 (+1)	HDLBP	141 kDa	32.501	37.97	0.855965
Zinc finger CCCH-type antiviral protein 1 OS=Homo sapiens OX=9606 GN=ZC3HAV1 PE=1 SV=3	Q7Z2W4	ZC3HAV1	101 kDa	10.613	12.413	0.854991
60S ribosomal protein L26 (Fragment) OS=Homo sapiens OX=9606 GN=RPL26 PE=3 SV=1	J3QRC4	RPL26	16 kDa	10.613	12.413	0.854991
Fragile X mental retardation syndrome-related protein 1 OS=Homo sapiens OX=9606 GN=FXR1 PE=1 SV=3	P51114	FXR1	70 kDa	10.613	12.413	0.854991
Basic leucine zipper and W2 domain-containing protein 1 OS=Homo sapiens OX=9606 GN=BZW1 PE=1 SV=1	Q7L1Q6 (+2)	BZW1	48 kDa	10.613	12.413	0.854991
N-alpha-acetyltransferase 15, NatA auxiliary subunit OS=Homo sapiens OX=9606 GN=NAA15 PE=1 SV=1	Q9BXJ9	NAA15	101 kDa	10.613	12.413	0.854991
Septin-9 OS=Homo sapiens OX=9606 GN=SEPTIN9 PE=1 SV=2	Q9UHD8	SEPTIN9	65 kDa	21.225	24.826	0.85495
60S ribosomal protein L7a OS=Homo sapiens OX=9606 GN=RPL7A PE=1 SV=2	P62424	RPL7A	30 kDa	20.562	24.096	0.853337
C-1-tetrahydrofolate synthase, cytoplasmic OS=Homo sapiens OX=9606 GN=MTHFD1 PE=1 SV=3	P11586	MTHFD1	102 kDa	19.899	23.366	0.851622
Putative RNA-binding protein Luc7-like 2 OS=Homo sapiens OX=9606 GN=LUC7L2 PE=1 SV=2	Q9Y383	LUC7L2	47 kDa	9.9494	11.683	0.851613
ATP-dependent DNA/RNA helicase DHX36 OS=Homo sapiens OX=9606 GN=DHX36 PE=1 SV=2	Q9H2U1 (+1)	DHX36	115 kDa	9.9494	11.683	0.851613
YTH domain-containing family protein 1 OS=Homo sapiens OX=9606 GN=YTHDF1 PE=1 SV=1	Q9BYJ9	YTHDF1	61 kDa	9.2861	10.953	0.847813
RNA-splicing ligase RtcB homolog OS=Homo sapiens OX=9606 GN=RTCB PE=1 SV=1	Q9Y3I0	RTCB	55 kDa	18.572	21.906	0.847804
CLIP-associating protein 2 OS=Homo sapiens OX=9606 GN=CLASP2 PE=1 SV=2	E3W994	CLASP2	139 kDa	8.6228	10.223	0.843471
Villin-1 OS=Homo sapiens OX=9606 GN=VIL1 PE=1 SV=4	P09327	VIL1	93 kDa	8.6228	10.223	0.843471
A-kinase anchor protein 5 OS=Homo sapiens OX=9606 GN=AKAP5 PE=1 SV=3	P24588	AKAP5	47 kDa	8.6228	10.223	0.843471
Dolichyl-diphosphooligosaccharide--protein glycosyltransferase subunit 2 OS=Homo sapiens OX=9606 GN=RPN2 PE=1 SV=3	P04844 (+1)	RPN2	69 kDa	7.9595	9.4924	0.838513
60S ribosomal protein L35a OS=Homo sapiens OX=9606 GN=RPL35A PE=1 SV=2	P18077	RPL35A	13 kDa	7.9595	9.4924	0.838513
Mitogen-activated protein kinase kinase kinase kinase 4 OS=Homo sapiens OX=9606 GN=MAP4K4 PE=1 SV=1	E7EN19 (+1)	MAP4K4	145 kDa	7.9595	9.4924	0.838513
Histone H1.2 OS=Homo sapiens OX=9606 GN=H1-2 PE=1 SV=2	P16403	H1-2	21 kDa	7.9595	9.4924	0.838513
Probable ATP-dependent RNA helicase DDX6 OS=Homo sapiens OX=9606 GN=DDX6 PE=1 SV=2	P26196	DDX6	54 kDa	7.9595	9.4924	0.838513
E3 ubiquitin-protein ligase TRIM71 OS=Homo sapiens OX=9606 GN=TRIM71 PE=1 SV=1	Q2Q1W2	TRIM71	93 kDa	7.9595	9.4924	0.838513
Coatomer subunit beta OS=Homo sapiens OX=9606 GN=COPB1 PE=1 SV=3	P53618	COPB1	107 kDa	7.9595	9.4924	0.838513
Eukaryotic translation initiation factor 3 subunit J OS=Homo sapiens OX=9606 GN=EIF3J PE=1 SV=2	O75822	EIF3J	29 kDa	7.9595	9.4924	0.838513
Thrombospondin-1 OS=Homo sapiens OX=9606 GN=THBS1 PE=1 SV=2	P07996	THBS1	129 kDa	31.838	37.97	0.838504
Eukaryotic translation initiation factor 3 subunit A OS=Homo sapiens OX=9606 GN=EIF3A PE=1 SV=1	Q14152	EIF3A	167 kDa	47.094	56.224	0.837614
60S ribosomal protein L17 (Fragment) OS=Homo sapiens OX=9606 GN=RPL17 PE=1 SV=1	A0A087WXM6 (+5)	RPL17	20 kDa	15.256	18.255	0.835716
60S ribosomal protein L3 OS=Homo sapiens OX=9606 GN=RPL3 PE=1 SV=2	P39023	RPL3	46 kDa	22.552	27.017	0.834734
Tubulin alpha-1B chain OS=Homo sapiens OX=9606 GN=TUBA1B PE=1 SV=1	P68363 (+2)	TUBA1B	50 kDa	13.929	16.794	0.829403
Dolichyl-diphosphooligosaccharide--protein glycosyltransferase subunit 1 OS=Homo sapiens OX=9606 GN=RPN1 PE=1 SV=1	P04843	RPN1	69 kDa	13.929	16.794	0.829403
Ezrin OS=Homo sapiens OX=9606 GN=EZR PE=1 SV=3	E7EQR4 (+1)	EZR	69 kDa	13.929	16.794	0.829403
ATP-dependent RNA helicase A OS=Homo sapiens OX=9606 GN=DHX9 PE=1 SV=4	Q08211	DHX9	141 kDa	20.562	24.826	0.828245
Eukaryotic translation initiation factor 2 subunit 2 OS=Homo sapiens OX=9606 GN=EIF2S2 PE=1 SV=2	P20042	EIF2S2	38 kDa	20.562	24.826	0.828245
60S ribosomal protein L13a OS=Homo sapiens OX=9606 GN=RPL13A PE=4 SV=1	A0A7I2V5L3	RPL13A	22 kDa	13.266	16.064	0.825822
40S ribosomal protein S15a OS=Homo sapiens OX=9606 GN=RPS15A PE=1 SV=1	I3L3P7 (+1)	RPS15A	11 kDa	13.266	16.064	0.825822
Peroxiredoxin-4 OS=Homo sapiens OX=9606 GN=PRDX4 PE=1 SV=1	Q13162	PRDX4	31 kDa	6.6329	8.0321	0.825799
RNA transcription, translation and transport factor protein OS=Homo sapiens OX=9606 GN=RTRAF PE=1 SV=1	Q9Y224	RTRAF	28 kDa	6.6329	8.0321	0.825799
Fructose-bisphosphate aldolase A OS=Homo sapiens OX=9606 GN=ALDOA PE=1 SV=2	P04075	ALDOA	39 kDa	6.6329	8.0321	0.825799
Activating signal cointegrator 1 OS=Homo sapiens OX=9606 GN=TRIP4 PE=1 SV=4	Q15650	TRIP4	66 kDa	6.6329	8.0321	0.825799
WW domain-binding protein 11 OS=Homo sapiens OX=9606 GN=WBP11 PE=1 SV=1	Q9Y2W2	WBP11	70 kDa	6.6329	8.0321	0.825799
Poly(rC)-binding protein 2 OS=Homo sapiens OX=9606 GN=PCBP2 PE=1 SV=1	F8VZX2 (+7)	PCBP2	34 kDa	6.6329	8.0321	0.825799
Heterogeneous nuclear ribonucleoproteins A2/B1 OS=Homo sapiens OX=9606 GN=HNRNPA2B1 PE=1 SV=2	P22626	HNRNPA2B1	37 kDa	25.868	31.398	0.823874
Histone H1.5 OS=Homo sapiens OX=9606 GN=H1-5 PE=1 SV=3	P16401	H1-5	23 kDa	12.603	15.334	0.821899
Alpha-enolase OS=Homo sapiens OX=9606 GN=ENO1 PE=1 SV=2	P06733	ENO1	47 kDa	5.9696	7.3019	0.817541
Histone H4 OS=Homo sapiens OX=9606 GN=H4C1 PE=1 SV=2	P62805	H4C1	11 kDa	5.9696	7.3019	0.817541
Enoyl-CoA hydratase, mitochondrial OS=Homo sapiens OX=9606 GN=ECHS1 PE=1 SV=4	P30084	ECHS1	31 kDa	5.9696	7.3019	0.817541
Apoptosis-inducing factor 1, mitochondrial OS=Homo sapiens OX=9606 GN=AIFM1 PE=1 SV=1	A0A6Q8PFE1 (+3)	AIFM1	68 kDa	5.9696	7.3019	0.817541
60S ribosomal protein L8 (Fragment) OS=Homo sapiens OX=9606 GN=RPL8 PE=1 SV=1	E9PKZ0 (+1)	RPL8	22 kDa	11.939	14.604	0.817516
Eukaryotic translation initiation factor 2 subunit 1 OS=Homo sapiens OX=9606 GN=EIF2S1 PE=1 SV=3	P05198	EIF2S1	36 kDa	17.246	21.175	0.814451
Eukaryotic translation initiation factor 3 subunit L OS=Homo sapiens OX=9606 GN=EIF3L PE=1 SV=1	B0QY89 (+1)	EIF3L	71 kDa	22.552	27.747	0.812773
Nuclear fragile X mental retardation-interacting protein 2 OS=Homo sapiens OX=9606 GN=NUFIP2 PE=1 SV=1	Q7Z417	NUFIP2	76 kDa	11.276	13.874	0.812743
Heterogeneous nuclear ribonucleoprotein A1 OS=Homo sapiens OX=9606 GN=HNRNPA1 PE=4 SV=1	A0A7I2V3R8 (+3)	HNRNPA1	34 kDa	16.582	20.445	0.811054
60S ribosomal protein L5 OS=Homo sapiens OX=9606 GN=RPL5 PE=1 SV=3	P46777	RPL5	34 kDa	21.889	27.017	0.810194
RNA-binding protein Raly (Fragment) OS=Homo sapiens OX=9606 GN=RALY PE=1 SV=1	Q5QPL9 (+1)	RALY	25 kDa	10.613	13.143	0.807502
60S ribosomal protein L31 OS=Homo sapiens OX=9606 GN=RPL31 PE=1 SV=1	P62899	RPL31	14 kDa	10.613	13.143	0.807502
Glycylpeptide N-tetradecanoyltransferase 1 OS=Homo sapiens OX=9606 GN=NMT1 PE=4 SV=1	A0A7I2V539 (+1)	NMT1	57 kDa	5.3063	6.5717	0.807447
RNA-binding protein 39 OS=Homo sapiens OX=9606 GN=RBM39 PE=1 SV=2	Q14498 (+2)	RBM39	59 kDa	5.3063	6.5717	0.807447
Methylmalonyl-CoA mutase, mitochondrial OS=Homo sapiens OX=9606 GN=MMUT PE=1 SV=4	P22033	MMUT	83 kDa	20.562	25.557	0.804555
Malate dehydrogenase, mitochondrial OS=Homo sapiens OX=9606 GN=MDH2 PE=1 SV=3	P40926	MDH2	36 kDa	15.256	18.985	0.803582
Heterogeneous nuclear ribonucleoprotein U OS=Homo sapiens OX=9606 GN=HNRNPU PE=1 SV=6	Q00839	HNRNPU	91 kDa	25.205	31.398	0.802758
Electron transfer flavoprotein subunit beta OS=Homo sapiens OX=9606 GN=ETFB PE=1 SV=3	P38117	ETFB	28 kDa	9.9494	12.413	0.801531
Ataxin-2 OS=Homo sapiens OX=9606 GN=ATXN2 PE=1 SV=1	A0A2R8Y7P6 (+5)	ATXN2	104 kDa	9.9494	12.413	0.801531
Glutamate dehydrogenase 1, mitochondrial OS=Homo sapiens OX=9606 GN=GLUD1 PE=1 SV=2	P00367	GLUD1	61 kDa	27.858	35.049	0.79483
Protein-glutamine gamma-glutamyltransferase 2 OS=Homo sapiens OX=9606 GN=TGM2 PE=1 SV=2	P21980	TGM2	77 kDa	4.643	5.8415	0.79483
RRP12-like protein OS=Homo sapiens OX=9606 GN=RRP12 PE=1 SV=2	Q5JTH9 (+2)	RRP12	144 kDa	4.643	5.8415	0.79483
Lysosomal acid phosphatase OS=Homo sapiens OX=9606 GN=ACP2 PE=1 SV=1	A0A5F9ZHR7 (+1)	ACP2	49 kDa	4.643	5.8415	0.79483
Histone H2B type 1-K OS=Homo sapiens OX=9606 GN=H2BC12 PE=1 SV=3	O60814 (+10)	H2BC12	14 kDa	4.643	5.8415	0.79483
Anterior gradient protein 2 homolog OS=Homo sapiens OX=9606 GN=AGR2 PE=1 SV=1	O95994	AGR2	20 kDa	4.643	5.8415	0.79483
Scaffold attachment factor B1 OS=Homo sapiens OX=9606 GN=SAFB PE=1 SV=4	Q15424 (+3)	SAFB	103 kDa	4.643	5.8415	0.79483
Constitutive coactivator of PPAR-gamma-like protein 1 OS=Homo sapiens OX=9606 GN=FAM120A PE=1 SV=2	Q9NZB2 (+1)	FAM120A	122 kDa	4.643	5.8415	0.79483
39S ribosomal protein L11, mitochondrial OS=Homo sapiens OX=9606 GN=MRPL11 PE=1 SV=1	Q9Y3B7	MRPL11	21 kDa	4.643	5.8415	0.79483
Transcriptional activator protein Pur-alpha OS=Homo sapiens OX=9606 GN=PURA PE=1 SV=2	Q00577	PURA	35 kDa	4.643	5.8415	0.79483
Double-stranded RNA-specific adenosine deaminase OS=Homo sapiens OX=9606 GN=ADAR PE=1 SV=4	P55265 (+2)	ADAR	136 kDa	4.643	5.8415	0.79483
Exosome complex component RRP4 OS=Homo sapiens OX=9606 GN=EXOSC2 PE=1 SV=2	Q13868	EXOSC2	33 kDa	4.643	5.8415	0.79483
40S ribosomal protein S11 OS=Homo sapiens OX=9606 GN=RPS11 PE=1 SV=3	P62280	RPS11	18 kDa	13.266	16.794	0.789925
Insulin-like growth factor 2 mRNA-binding protein 1 OS=Homo sapiens OX=9606 GN=IGF2BP1 PE=1 SV=2	Q9NZI8	IGF2BP1	63 kDa	35.154	44.541	0.78925
Matrin-3 OS=Homo sapiens OX=9606 GN=MATR3 PE=1 SV=1	A0A0R4J2E8 (+2)	MATR3	95 kDa	8.6228	10.953	0.787255
Peptidyl-prolyl cis-trans isomerase B OS=Homo sapiens OX=9606 GN=PPIB PE=1 SV=2	P23284	PPIB	24 kDa	8.6228	10.953	0.787255
Cytosol aminopeptidase OS=Homo sapiens OX=9606 GN=LAP3 PE=1 SV=3	P28838 (+1)	LAP3	56 kDa	8.6228	10.953	0.787255
Peroxisomal multifunctional enzyme type 2 OS=Homo sapiens OX=9606 GN=HSD17B4 PE=1 SV=1	A0A2R8YD50 (+1)	HSD17B4	77 kDa	12.603	16.064	0.784549
TATA-binding protein-associated factor 2N OS=Homo sapiens OX=9606 GN=TAF15 PE=1 SV=1	Q92804 (+1)	TAF15	62 kDa	3.9797	5.1113	0.778608
Protein FAM98B OS=Homo sapiens OX=9606 GN=FAM98B PE=1 SV=2	Q52LJ0	FAM98B	46 kDa	3.9797	5.1113	0.778608
Importin subunit alpha-1 OS=Homo sapiens OX=9606 GN=KPNA2 PE=4 SV=1	A0A7I2V351 (+3)	KPNA2	55 kDa	3.9797	5.1113	0.778608
Calcium-binding mitochondrial carrier protein Aralar2 OS=Homo sapiens OX=9606 GN=SLC25A13 PE=1 SV=2	Q9UJS0 (+1)	SLC25A13	74 kDa	3.9797	5.1113	0.778608
RNA-binding protein FUS OS=Homo sapiens OX=9606 GN=FUS PE=1 SV=1	H3BPE7 (+2)	FUS	53 kDa	3.9797	5.1113	0.778608
Formyltetrahydrofolate synthetase OS=Homo sapiens OX=9606 GN=MTHFD1L PE=1 SV=1	A0A087WVM4 (+2)	MTHFD1L	99 kDa	3.9797	5.1113	0.778608
Aspartate aminotransferase, mitochondrial OS=Homo sapiens OX=9606 GN=GOT2 PE=1 SV=3	P00505	GOT2	48 kDa	3.9797	5.1113	0.778608
60S acidic ribosomal protein P2 OS=Homo sapiens OX=9606 GN=RPLP2 PE=1 SV=1	P05387	RPLP2	12 kDa	3.9797	5.1113	0.778608
Guanine nucleotide-binding protein G(s) subunit alpha isoforms short OS=Homo sapiens OX=9606 GN=GNAS PE=1 SV=1	P63092 (+5)	GNAS	46 kDa	3.9797	5.1113	0.778608
E3 ubiquitin-protein ligase ZNF598 OS=Homo sapiens OX=9606 GN=ZNF598 PE=1 SV=1	Q86UK7 (+2)	ZNF598	99 kDa	3.9797	5.1113	0.778608
ATP-dependent RNA helicase DDX18 OS=Homo sapiens OX=9606 GN=DDX18 PE=1 SV=2	Q9NVP1	DDX18	75 kDa	3.9797	5.1113	0.778608
Gamma-adducin OS=Homo sapiens OX=9606 GN=ADD3 PE=1 SV=1	Q9UEY8 (+1)	ADD3	79 kDa	3.9797	5.1113	0.778608
Uncharacterized protein C11orf98 OS=Homo sapiens OX=9606 GN=C11orf98 PE=4 SV=2	E9PRG8	C11orf98	14 kDa	3.9797	5.1113	0.778608
Leucine-rich repeat flightless-interacting protein 1 OS=Homo sapiens OX=9606 GN=LRRFIP1 PE=1 SV=2	Q32MZ4 (+2)	LRRFIP1	89 kDa	3.9797	5.1113	0.778608
Ras-related protein Rab-11B OS=Homo sapiens OX=9606 GN=RAB11B PE=1 SV=4	Q15907	RAB11B	24 kDa	3.9797	5.1113	0.778608
High mobility group protein HMG-I/HMG-Y OS=Homo sapiens OX=9606 GN=HMGA1 PE=1 SV=3	P17096 (+1)	HMGA1	12 kDa	3.9797	5.1113	0.778608
40S ribosomal protein S30 OS=Homo sapiens OX=9606 GN=FAU PE=1 SV=1	E9PR30 (+1)	FAU	11 kDa	3.9797	5.1113	0.778608
Ras-related protein Rab-5B OS=Homo sapiens OX=9606 GN=RAB5B PE=1 SV=1	P61020	RAB5B	24 kDa	3.9797	5.1113	0.778608
60S ribosomal protein L28 OS=Homo sapiens OX=9606 GN=RPL28 PE=1 SV=3	P46779	RPL28	16 kDa	7.9595	10.223	0.778587
Nucleophosmin OS=Homo sapiens OX=9606 GN=NPM1 PE=4 SV=1	A0A7I2V5S2 (+3)	NPM1	34 kDa	7.9595	10.223	0.778587
40S ribosomal protein S4, X isoform OS=Homo sapiens OX=9606 GN=RPS4X PE=1 SV=2	P62701	RPS4X	30 kDa	34.491	44.541	0.774365
ATP-binding cassette sub-family D member 3 OS=Homo sapiens OX=9606 GN=ABCD3 PE=1 SV=2	A0A3B3ITW3 (+1)	ABCD3	75 kDa	7.2962	9.4924	0.768636
Exosome RNA helicase MTR4 OS=Homo sapiens OX=9606 GN=MTREX PE=1 SV=3	P42285	MTREX	118 kDa	7.2962	9.4924	0.768636
40S ribosomal protein S13 OS=Homo sapiens OX=9606 GN=RPS13 PE=1 SV=2	P62277	RPS13	17 kDa	7.2962	9.4924	0.768636
Protein argonaute-2 OS=Homo sapiens OX=9606 GN=AGO2 PE=1 SV=3	Q9UKV8 (+1)	AGO2	97 kDa	7.2962	9.4924	0.768636
40S ribosomal protein S25 OS=Homo sapiens OX=9606 GN=RPS25 PE=1 SV=1	P62851	RPS25	14 kDa	14.592	18.985	0.768607
Eukaryotic translation initiation factor 2A OS=Homo sapiens OX=9606 GN=EIF2A PE=1 SV=3	Q9BY44 (+1)	EIF2A	65 kDa	10.613	13.874	0.764956
40S ribosomal protein S9 OS=Homo sapiens OX=9606 GN=RPS9 PE=1 SV=3	P46781	RPS9	23 kDa	24.542	32.128	0.763882
Elongation factor 1-gamma OS=Homo sapiens OX=9606 GN=EEF1G PE=1 SV=3	P26641 (+1)	EEF1G	50 kDa	13.929	18.255	0.763024
cAMP-dependent protein kinase type II-alpha regulatory subunit OS=Homo sapiens OX=9606 GN=PRKAR2A PE=1 SV=2	P13861	PRKAR2A	46 kDa	23.878	31.398	0.760494
La-related protein 4 OS=Homo sapiens OX=9606 GN=LARP4 PE=1 SV=3	Q71RC2 (+2)	LARP4	81 kDa	9.9494	13.143	0.757011
Disks large homolog 1 OS=Homo sapiens OX=9606 GN=DLG1 PE=1 SV=1	A0A0C4DFT3 (+15)	DLG1	100 kDa	3.3165	4.3811	0.757002
Signal recognition particle 14 kDa protein OS=Homo sapiens OX=9606 GN=SRP14 PE=1 SV=2	P37108	SRP14	15 kDa	3.3165	4.3811	0.757002
Pre-mRNA-processing factor 19 OS=Homo sapiens OX=9606 GN=PRPF19 PE=1 SV=1	Q9UMS4	PRPF19	55 kDa	3.3165	4.3811	0.757002
Actin-like protein 3 OS=Homo sapiens OX=9606 GN=ACTR3 PE=1 SV=1	B4DXW1 (+1)	ACTR3	42 kDa	3.3165	4.3811	0.757002
Cleavage and polyadenylation specificity factor subunit 6 OS=Homo sapiens OX=9606 GN=CPSF6 PE=1 SV=1	F8WJN3	CPSF6	52 kDa	3.3165	4.3811	0.757002
Brefeldin A-inhibited guanine nucleotide-exchange protein 2 OS=Homo sapiens OX=9606 GN=ARFGEF2 PE=1 SV=3	Q9Y6D5	ARFGEF2	202 kDa	3.3165	4.3811	0.757002
Coiled-coil and C2 domain-containing protein 1A OS=Homo sapiens OX=9606 GN=CC2D1A PE=1 SV=1	Q6P1N0 (+1)	CC2D1A	104 kDa	3.3165	4.3811	0.757002
Copine-3 OS=Homo sapiens OX=9606 GN=CPNE3 PE=1 SV=1	O75131	CPNE3	60 kDa	3.3165	4.3811	0.757002
Replication factor C subunit 4 OS=Homo sapiens OX=9606 GN=RFC4 PE=1 SV=2	P35249	RFC4	40 kDa	3.3165	4.3811	0.757002
Destrin OS=Homo sapiens OX=9606 GN=DSTN PE=1 SV=3	P60981 (+1)	DSTN	19 kDa	3.3165	4.3811	0.757002
Chromobox protein homolog 3 OS=Homo sapiens OX=9606 GN=CBX3 PE=1 SV=4	Q13185	CBX3	21 kDa	3.3165	4.3811	0.757002
Thioredoxin-dependent peroxide reductase, mitochondrial OS=Homo sapiens OX=9606 GN=PRDX3 PE=1 SV=3	P30048 (+1)	PRDX3	28 kDa	3.3165	4.3811	0.757002
Serine/threonine-protein kinase RIO2 OS=Homo sapiens OX=9606 GN=RIOK2 PE=1 SV=2	Q9BVS4	RIOK2	63 kDa	3.3165	4.3811	0.757002
28S ribosomal protein S29, mitochondrial OS=Homo sapiens OX=9606 GN=DAP3 PE=1 SV=1	P51398 (+2)	DAP3	46 kDa	3.3165	4.3811	0.757002
Malignant T-cell-amplified sequence 1 OS=Homo sapiens OX=9606 GN=MCTS1 PE=1 SV=1	Q9ULC4 (+1)	MCTS1	21 kDa	3.3165	4.3811	0.757002
ATPase family AAA domain-containing protein 2 OS=Homo sapiens OX=9606 GN=ATAD2 PE=1 SV=1	Q6PL18	ATAD2	159 kDa	3.3165	4.3811	0.757002
Ras-related protein Rab-5A OS=Homo sapiens OX=9606 GN=RAB5A PE=1 SV=2	P20339 (+1)	RAB5A	24 kDa	3.3165	4.3811	0.757002
ATP-citrate synthase OS=Homo sapiens OX=9606 GN=ACLY PE=1 SV=3	P53396 (+1)	ACLY	121 kDa	6.6329	8.7622	0.75699
RNA-binding protein 47 OS=Homo sapiens OX=9606 GN=RBM47 PE=1 SV=2	A0AV96 (+2)	RBM47	64 kDa	6.6329	8.7622	0.75699
Cytochrome b-c1 complex subunit 2, mitochondrial OS=Homo sapiens OX=9606 GN=UQCRC2 PE=1 SV=1	H3BRG4 (+1)	UQCRC2	45 kDa	6.6329	8.7622	0.75699
60S ribosomal protein L21 OS=Homo sapiens OX=9606 GN=RPL21 PE=1 SV=2	P46778	RPL21	19 kDa	6.6329	8.7622	0.75699
Ubiquitin-associated protein 2-like OS=Homo sapiens OX=9606 GN=UBAP2L PE=1 SV=2	Q14157 (+2)	UBAP2L	115 kDa	12.603	16.794	0.750447
Eukaryotic translation initiation factor 4B OS=Homo sapiens OX=9606 GN=EIF4B PE=1 SV=2	P23588	EIF4B	69 kDa	55.053	73.749	0.746491
Eukaryotic translation initiation factor 3 subunit E OS=Homo sapiens OX=9606 GN=EIF3E PE=4 SV=1	A0A7I2V2W0	EIF3E	52 kDa	15.256	20.445	0.746197
Splicing factor 3A subunit 1 OS=Homo sapiens OX=9606 GN=SF3A1 PE=1 SV=1	Q15459	SF3A1	89 kDa	5.9696	8.0321	0.743218
Serine/arginine-rich splicing factor 4 OS=Homo sapiens OX=9606 GN=SRSF4 PE=1 SV=2	Q08170	SRSF4	57 kDa	5.9696	8.0321	0.743218
Ubiquitin-40S ribosomal protein S27a OS=Homo sapiens OX=9606 GN=RPS27A PE=1 SV=2	P62979	RPS27A	18 kDa	14.592	19.715	0.740147
Structural maintenance of chromosomes protein 1A OS=Homo sapiens OX=9606 GN=SMC1A PE=1 SV=2	Q14683	SMC1A	143 kDa	8.6228	11.683	0.738064
RuvB-like 2 OS=Homo sapiens OX=9606 GN=RUVBL2 PE=1 SV=3	Q9Y230	RUVBL2	51 kDa	8.6228	11.683	0.738064
40S ribosomal protein SA (Fragment) OS=Homo sapiens OX=9606 GN=RPSA PE=1 SV=8	C9J9K3 (+1)	RPSA	29 kDa	13.929	18.985	0.733684
ATP synthase subunit beta, mitochondrial OS=Homo sapiens OX=9606 GN=ATP5F1B PE=1 SV=3	P06576	ATP5F1B	57 kDa	13.929	18.985	0.733684
Ras-related protein Ral-B OS=Homo sapiens OX=9606 GN=RALB PE=1 SV=1	P11234 (+2)	RALB	23 kDa	2.6532	3.6509	0.726725
Annexin A7 OS=Homo sapiens OX=9606 GN=ANXA7 PE=1 SV=3	P20073 (+1)	ANXA7	53 kDa	2.6532	3.6509	0.726725
Small nuclear ribonucleoprotein Sm D1 OS=Homo sapiens OX=9606 GN=SNRPD1 PE=1 SV=1	P62314	SNRPD1	13 kDa	2.6532	3.6509	0.726725
Zinc finger CCHC domain-containing protein 8 OS=Homo sapiens OX=9606 GN=ZCCHC8 PE=1 SV=2	Q6NZY4 (+1)	ZCCHC8	79 kDa	2.6532	3.6509	0.726725
Transformer-2 protein homolog beta OS=Homo sapiens OX=9606 GN=TRA2B PE=1 SV=1	P62995 (+1)	TRA2B	34 kDa	2.6532	3.6509	0.726725
Large subunit GTPase 1 homolog OS=Homo sapiens OX=9606 GN=LSG1 PE=1 SV=2	Q9H089	LSG1	75 kDa	2.6532	3.6509	0.726725
Ribosomal RNA processing protein 1 homolog A OS=Homo sapiens OX=9606 GN=RRP1 PE=1 SV=1	P56182	RRP1	53 kDa	2.6532	3.6509	0.726725
Isoform 2 of MAP7 domain-containing protein 2 OS=Homo sapiens OX=9606 GN=MAP7D2	Q96T17-2	MAP7D2	86 kDa	2.6532	3.6509	0.726725
Serine/threonine-protein phosphatase 2A catalytic subunit beta isoform OS=Homo sapiens OX=9606 GN=PPP2CB PE=1 SV=1	P62714	PPP2CB	36 kDa	2.6532	3.6509	0.726725
HBS1-like protein OS=Homo sapiens OX=9606 GN=HBS1L PE=1 SV=1	B7Z524 (+4)	HBS1L	57 kDa	2.6532	3.6509	0.726725
Glutamate-rich WD repeat-containing protein 1 OS=Homo sapiens OX=9606 GN=GRWD1 PE=1 SV=1	Q9BQ67	GRWD1	49 kDa	2.6532	3.6509	0.726725
Calcium/calmodulin-dependent protein kinase OS=Homo sapiens OX=9606 GN=CAMK2D PE=1 SV=1	D6R938 (+8)	CAMK2D	56 kDa	2.6532	3.6509	0.726725
Protein flightless-1 homolog OS=Homo sapiens OX=9606 GN=FLII PE=1 SV=2	Q13045 (+2)	FLII	145 kDa	2.6532	3.6509	0.726725
AT-rich interactive domain-containing protein 3A OS=Homo sapiens OX=9606 GN=ARID3A PE=1 SV=2	Q99856	ARID3A	63 kDa	2.6532	3.6509	0.726725
Guanine nucleotide binding protein-like 3 (Nucleolar)-like, isoform CRA_b OS=Homo sapiens OX=9606 GN=GNL3L PE=1 SV=1	A0A6I8PS19 (+1)	GNL3L	58 kDa	2.6532	3.6509	0.726725
Host cell factor 1 OS=Homo sapiens OX=9606 GN=HCFC1 PE=1 SV=2	P51610 (+1)	HCFC1	209 kDa	2.6532	3.6509	0.726725
Cell growth-regulating nucleolar protein OS=Homo sapiens OX=9606 GN=LYAR PE=1 SV=2	Q9NX58	LYAR	44 kDa	2.6532	3.6509	0.726725
Isoform 3 of Kinesin light chain 4 OS=Homo sapiens OX=9606 GN=KLC4	Q9NSK0-3	KLC4	71 kDa	2.6532	3.6509	0.726725
G2/mitotic-specific cyclin-B1 (Fragment) OS=Homo sapiens OX=9606 GN=CCNB1 PE=1 SV=1	E9PC90 (+1)	CCNB1	45 kDa	2.6532	3.6509	0.726725
Atlastin-3 OS=Homo sapiens OX=9606 GN=ATL3 PE=1 SV=1	F5H6I7 (+1)	ATL3	59 kDa	2.6532	3.6509	0.726725
CTD small phosphatase-like protein 2 OS=Homo sapiens OX=9606 GN=CTDSPL2 PE=1 SV=2	Q05D32 (+1)	CTDSPL2	53 kDa	2.6532	3.6509	0.726725
AP-1 complex subunit gamma-1 OS=Homo sapiens OX=9606 GN=AP1G1 PE=1 SV=5	O43747 (+1)	AP1G1	91 kDa	2.6532	3.6509	0.726725
Agmatinase, mitochondrial OS=Homo sapiens OX=9606 GN=AGMAT PE=1 SV=2	Q9BSE5	AGMAT	38 kDa	2.6532	3.6509	0.726725
Isoform 2 of Poly(A) RNA polymerase, mitochondrial OS=Homo sapiens OX=9606 GN=MTPAP	Q9NVV4-2	MTPAP	79 kDa	2.6532	3.6509	0.726725
Serine/threonine-protein kinase MRCK beta OS=Homo sapiens OX=9606 GN=CDC42BPB PE=1 SV=2	Q9Y5S2	CDC42BPB	194 kDa	2.6532	3.6509	0.726725
Histone H2A.Z OS=Homo sapiens OX=9606 GN=H2AZ1 PE=1 SV=2	P0C0S5 (+1)	H2AZ1	14 kDa	2.6532	3.6509	0.726725
Calcium load-activated calcium channel OS=Homo sapiens OX=9606 GN=TMCO1 PE=1 SV=2	Q9UM00 (+1)	TMCO1	27 kDa	2.6532	3.6509	0.726725
High mobility group nucleosome-binding domain-containing protein 4 OS=Homo sapiens OX=9606 GN=HMGN4 PE=1 SV=3	O00479	HMGN4	10 kDa	2.6532	3.6509	0.726725
DnaJ homolog subfamily C member 8 OS=Homo sapiens OX=9606 GN=DNAJC8 PE=1 SV=2	O75937	DNAJC8	30 kDa	2.6532	3.6509	0.726725
Coatomer subunit epsilon OS=Homo sapiens OX=9606 GN=COPE PE=1 SV=1	M0QXB4 (+4)	COPE	37 kDa	2.6532	3.6509	0.726725
Poly(rC)-binding protein 1 OS=Homo sapiens OX=9606 GN=PCBP1 PE=1 SV=2	Q15365	PCBP1	37 kDa	10.613	14.604	0.726719
Eukaryotic translation initiation factor 3 subunit G OS=Homo sapiens OX=9606 GN=EIF3G PE=1 SV=2	O75821	EIF3G	36 kDa	13.266	18.255	0.726705
RNA helicase OS=Homo sapiens OX=9606 GN=DDX46 PE=1 SV=1	A0A0C4DG89 (+1)	DDX46	117 kDa	5.3063	7.3019	0.726701
Partner of Y14 and mago OS=Homo sapiens OX=9606 GN=PYM1 PE=1 SV=1	Q9BRP8 (+1)	PYM1	23 kDa	5.3063	7.3019	0.726701
Tyrosine-protein phosphatase non-receptor type 1 OS=Homo sapiens OX=9606 GN=PTPN1 PE=1 SV=1	P18031	PTPN1	50 kDa	5.3063	7.3019	0.726701
YTH domain family, member 3, isoform CRA_a OS=Homo sapiens OX=9606 GN=YTHDF3 PE=1 SV=1	A0A024R7W5 (+3)	YTHDF3	58 kDa	5.3063	7.3019	0.726701
A-kinase anchor protein 1, mitochondrial OS=Homo sapiens OX=9606 GN=AKAP1 PE=1 SV=1	Q92667	AKAP1	97 kDa	7.9595	10.953	0.726696
Isoform 13 of Myomegalin OS=Homo sapiens OX=9606 GN=PDE4DIP	Q5VU43-13	PDE4DIP	127 kDa	9.9494	13.874	0.717126
Probable ATP-dependent RNA helicase DDX23 OS=Homo sapiens OX=9606 GN=DDX23 PE=1 SV=3	Q9BUQ8	DDX23	96 kDa	7.2962	10.223	0.713704
T-complex protein 1 subunit beta OS=Homo sapiens OX=9606 GN=CCT2 PE=1 SV=4	P78371	CCT2	57 kDa	7.2962	10.223	0.713704
Immunoglobulin heavy constant gamma 1 (Fragment) OS=Homo sapiens OX=9606 GN=IGHG1 PE=1 SV=1	A0A0A0MS07 (+2)	IGHG1	32 kDa	7.2962	10.223	0.713704
Probable 28S rRNA (cytosine(4447)-C(5))-methyltransferase OS=Homo sapiens OX=9606 GN=NOP2 PE=1 SV=2	P46087 (+2)	NOP2	89 kDa	7.2962	10.223	0.713704
Heterogeneous nuclear ribonucleoprotein F OS=Homo sapiens OX=9606 GN=HNRNPF PE=1 SV=3	P52597	HNRNPF	46 kDa	7.2962	10.223	0.713704
40S ribosomal protein S23 OS=Homo sapiens OX=9606 GN=RPS23 PE=1 SV=3	P62266	RPS23	16 kDa	7.2962	10.223	0.713704
40S ribosomal protein S16 OS=Homo sapiens OX=9606 GN=RPS16 PE=1 SV=2	P62249	RPS16	16 kDa	19.235	27.017	0.711959
Serine/arginine-rich splicing factor 6 OS=Homo sapiens OX=9606 GN=SRSF6 PE=1 SV=2	Q13247 (+1)	SRSF6	40 kDa	11.939	16.794	0.710909
X-ray repair cross-complementing protein 5 OS=Homo sapiens OX=9606 GN=XRCC5 PE=1 SV=3	P13010	XRCC5	83 kDa	16.582	23.366	0.709664
Isoform 4 of 40S ribosomal protein S24 OS=Homo sapiens OX=9606 GN=RPS24	P62847-4	RPS24	32 kDa	4.643	6.5717	0.706514
Apolipoprotein E OS=Homo sapiens OX=9606 GN=APOE PE=1 SV=1	P02649	APOE	36 kDa	4.643	6.5717	0.706514
ATP-dependent 6-phosphofructokinase, liver type OS=Homo sapiens OX=9606 GN=PFKL PE=1 SV=6	P17858	PFKL	85 kDa	4.643	6.5717	0.706514
Caldesmon OS=Homo sapiens OX=9606 GN=CALD1 PE=1 SV=1	E9PGZ1 (+2)	CALD1	62 kDa	4.643	6.5717	0.706514
H/ACA ribonucleoprotein complex subunit DKC1 OS=Homo sapiens OX=9606 GN=DKC1 PE=1 SV=3	O60832	DKC1	58 kDa	4.643	6.5717	0.706514
Eukaryotic translation initiation factor 2D OS=Homo sapiens OX=9606 GN=EIF2D PE=1 SV=3	P41214	EIF2D	65 kDa	4.643	6.5717	0.706514
Bystin OS=Homo sapiens OX=9606 GN=BYSL PE=1 SV=3	Q13895	BYSL	50 kDa	4.643	6.5717	0.706514
Gamma-taxilin OS=Homo sapiens OX=9606 GN=TXLNG PE=1 SV=2	Q9NUQ3	TXLNG	61 kDa	4.643	6.5717	0.706514
Plasminogen activator inhibitor 1 RNA-binding protein OS=Homo sapiens OX=9606 GN=SERBP1 PE=1 SV=2	Q8NC51	SERBP1	45 kDa	18.572	26.287	0.706509
Catalase OS=Homo sapiens OX=9606 GN=CAT PE=1 SV=3	P04040	CAT	60 kDa	6.6329	9.4924	0.698759
CLIP-associating protein 1 OS=Homo sapiens OX=9606 GN=CLASP1 PE=1 SV=2	F8WA11 (+5)	CLASP1	163 kDa	6.6329	9.4924	0.698759
Aconitate hydratase, mitochondrial OS=Homo sapiens OX=9606 GN=ACO2 PE=4 SV=1	A0A7I2V586 (+2)	ACO2	82 kDa	6.6329	9.4924	0.698759
Lamina-associated polypeptide 2, isoforms beta/gamma OS=Homo sapiens OX=9606 GN=TMPO PE=1 SV=2	P42167	TMPO	51 kDa	6.6329	9.4924	0.698759
DNA repair protein RAD50 OS=Homo sapiens OX=9606 GN=RAD50 PE=1 SV=1	Q92878 (+1)	RAD50	154 kDa	6.6329	9.4924	0.698759
Eukaryotic translation initiation factor 3 subunit C-like protein OS=Homo sapiens OX=9606 GN=EIF3CL PE=1 SV=1	B5ME19 (+2)	EIF3CL	105 kDa	23.878	34.319	0.695766
Ras GTPase-activating protein-binding protein 2 OS=Homo sapiens OX=9606 GN=G3BP2 PE=1 SV=2	Q9UN86	G3BP2	54 kDa	8.6228	12.413	0.694659
Serrate RNA effector molecule homolog OS=Homo sapiens OX=9606 GN=SRRT PE=1 SV=1	Q9BXP5 (+1)	SRRT	101 kDa	10.613	15.334	0.692122
MICOS complex subunit MIC60 (Fragment) OS=Homo sapiens OX=9606 GN=IMMT PE=1 SV=1	H7C463	IMMT	68 kDa	1.9899	2.9207	0.681309
Isoform 2 of ATP-dependent RNA helicase DDX42 OS=Homo sapiens OX=9606 GN=DDX42	Q86XP3-2	DDX42	90 kDa	1.9899	2.9207	0.681309
Putative GTP-binding protein 6 OS=Homo sapiens OX=9606 GN=GTPBP6 PE=2 SV=4	O43824	GTPBP6	57 kDa	1.9899	2.9207	0.681309
Proteasome subunit alpha type-3 OS=Homo sapiens OX=9606 GN=PSMA3 PE=1 SV=2	P25788 (+1)	PSMA3	28 kDa	1.9899	2.9207	0.681309
AP-2 complex subunit alpha-1 OS=Homo sapiens OX=9606 GN=AP2A1 PE=1 SV=3	O95782 (+1)	AP2A1	108 kDa	1.9899	2.9207	0.681309
Chloride intracellular channel protein 1 OS=Homo sapiens OX=9606 GN=CLIC1 PE=1 SV=4	O00299	CLIC1	27 kDa	1.9899	2.9207	0.681309
RNA-binding protein 26 OS=Homo sapiens OX=9606 GN=RBM26 PE=1 SV=3	Q5T8P6 (+1)	RBM26	114 kDa	1.9899	2.9207	0.681309
Retinol dehydrogenase 11 OS=Homo sapiens OX=9606 GN=RDH11 PE=1 SV=2	Q8TC12	RDH11	35 kDa	1.9899	2.9207	0.681309
Proteasome subunit alpha type (Fragment) OS=Homo sapiens OX=9606 GN=PSMA4 PE=1 SV=1	H0YL69 (+3)	PSMA4	26 kDa	1.9899	2.9207	0.681309
Ras-related C3 botulinum toxin substrate 1 OS=Homo sapiens OX=9606 GN=RAC1 PE=1 SV=1	P63000 (+1)	RAC1	21 kDa	1.9899	2.9207	0.681309
Trifunctional purine biosynthetic protein adenosine-3 OS=Homo sapiens OX=9606 GN=GART PE=1 SV=1	P22102	GART	108 kDa	1.9899	2.9207	0.681309
Calcyclin-binding protein OS=Homo sapiens OX=9606 GN=CACYBP PE=1 SV=2	Q9HB71 (+1)	CACYBP	26 kDa	1.9899	2.9207	0.681309
S-adenosylmethionine synthase isoform type-2 OS=Homo sapiens OX=9606 GN=MAT2A PE=1 SV=1	P31153	MAT2A	44 kDa	1.9899	2.9207	0.681309
RNA-binding protein Musashi homolog 2 (Fragment) OS=Homo sapiens OX=9606 GN=MSI2 PE=1 SV=1	A0A6Q8PF05 (+4)	MSI2	37 kDa	1.9899	2.9207	0.681309
Thioredoxin-related transmembrane protein 1 OS=Homo sapiens OX=9606 GN=TMX1 PE=1 SV=1	Q9H3N1	TMX1	32 kDa	1.9899	2.9207	0.681309
WD repeat-containing protein 1 OS=Homo sapiens OX=9606 GN=WDR1 PE=1 SV=4	O75083	WDR1	66 kDa	1.9899	2.9207	0.681309
5'-nucleotidase domain-containing protein 2 OS=Homo sapiens OX=9606 GN=NT5DC2 PE=1 SV=1	Q9H857 (+1)	NT5DC2	61 kDa	1.9899	2.9207	0.681309
Retinol dehydrogenase 13 OS=Homo sapiens OX=9606 GN=RDH13 PE=1 SV=2	Q8NBN7	RDH13	36 kDa	1.9899	2.9207	0.681309
Isoform 2 of Nucleolysin TIAR OS=Homo sapiens OX=9606 GN=TIAL1	Q01085-2	TIAL1	43 kDa	1.9899	2.9207	0.681309
Casein kinase I isoform alpha OS=Homo sapiens OX=9606 GN=CSNK1A1 PE=1 SV=1	A0A590UJ43 (+3)	CSNK1A1	49 kDa	1.9899	2.9207	0.681309
Proto-oncogene tyrosine-protein kinase Src OS=Homo sapiens OX=9606 GN=SRC PE=1 SV=3	P12931 (+1)	SRC	60 kDa	1.9899	2.9207	0.681309
ADP-ribosylation factor 5 (Fragment) OS=Homo sapiens OX=9606 GN=ARF5 PE=1 SV=1	C9J1Z8 (+1)	ARF5	17 kDa	1.9899	2.9207	0.681309
Histone deacetylase complex subunit SAP18 OS=Homo sapiens OX=9606 GN=SAP18 PE=1 SV=1	O00422 (+1)	SAP18	18 kDa	1.9899	2.9207	0.681309
Calcium/calmodulin-dependent protein kinase OS=Homo sapiens OX=9606 GN=CAMK2G PE=1 SV=1	A0A2Q3DQE3 (+13)	CAMK2G	62 kDa	1.9899	2.9207	0.681309
Nucleoside diphosphate kinase, mitochondrial (Fragment) OS=Homo sapiens OX=9606 GN=NME4 PE=1 SV=1	H0Y6J0	NME4	19 kDa	1.9899	2.9207	0.681309
Cerebral cavernous malformations 2 protein OS=Homo sapiens OX=9606 GN=CCM2 PE=1 SV=1	A0A0A0MT72 (+3)	CCM2	48 kDa	1.9899	2.9207	0.681309
Mitochondrial tRNA methylthiotransferase CDK5RAP1 OS=Homo sapiens OX=9606 GN=CDK5RAP1 PE=1 SV=2	Q96SZ6 (+2)	CDK5RAP1	68 kDa	1.9899	2.9207	0.681309
Transforming acidic coiled-coil-containing protein 2 OS=Homo sapiens OX=9606 GN=TACC2 PE=1 SV=1	E7EMZ9 (+3)	TACC2	297 kDa	1.9899	2.9207	0.681309
Translation initiation factor eIF-2B subunit beta OS=Homo sapiens OX=9606 GN=EIF2B2 PE=1 SV=1	G3V5E5 (+2)	EIF2B2	23 kDa	1.9899	2.9207	0.681309
Serine/threonine-protein kinase RIO1 OS=Homo sapiens OX=9606 GN=RIOK1 PE=1 SV=2	Q9BRS2	RIOK1	66 kDa	1.9899	2.9207	0.681309
Protein phosphatase methylesterase 1 OS=Homo sapiens OX=9606 GN=PPME1 PE=1 SV=3	Q9Y570 (+1)	PPME1	42 kDa	1.9899	2.9207	0.681309
Coiled-coil domain-containing protein 9 OS=Homo sapiens OX=9606 GN=CCDC9 PE=1 SV=1	A0A2R8Y4Z8 (+1)	CCDC9	65 kDa	1.9899	2.9207	0.681309
RNA-binding protein 27 OS=Homo sapiens OX=9606 GN=RBM27 PE=1 SV=2	Q9P2N5 (+1)	RBM27	119 kDa	1.9899	2.9207	0.681309
Protein quaking OS=Homo sapiens OX=9606 GN=QKI PE=1 SV=1	Q96PU8 (+5)	QKI	38 kDa	1.9899	2.9207	0.681309
Butyryl-CoA dehydrogenase OS=Homo sapiens OX=9606 GN=IVD PE=1 SV=2	A0A0A0MT83 (+1)	IVD	46 kDa	1.9899	2.9207	0.681309
RhoGAP domain containing protein OS=Entamoeba histolytica HM-1:IMSS OX=294381 GN=EHI_045100 PE=4 SV=1	C4LTC3 (+2)	EHI_045100	88 kDa	1.9899	2.9207	0.681309
Leucine-rich PPR motif-containing protein, mitochondrial OS=Homo sapiens OX=9606 GN=LRPPRC PE=1 SV=3	P42704	LRPPRC	158 kDa	21.889	32.128	0.681306
60S ribosomal protein L13 OS=Homo sapiens OX=9606 GN=RPL13 PE=1 SV=4	P26373	RPL13	24 kDa	11.939	17.524	0.681294
Eukaryotic translation initiation factor 3 subunit D OS=Homo sapiens OX=9606 GN=EIF3D PE=1 SV=1	O15371 (+1)	EIF3D	64 kDa	13.929	20.445	0.681291
ATP-dependent RNA helicase DDX1 OS=Homo sapiens OX=9606 GN=DDX1 PE=4 SV=1	A0A7I2V2M5 (+3)	DDX1	81 kDa	13.929	20.445	0.681291
Trifunctional enzyme subunit beta, mitochondrial OS=Homo sapiens OX=9606 GN=HADHB PE=1 SV=3	P55084 (+1)	HADHB	51 kDa	5.9696	8.7622	0.68129
Interleukin enhancer-binding factor 2 OS=Homo sapiens OX=9606 GN=ILF2 PE=1 SV=1	B4DY09 (+1)	ILF2	39 kDa	5.9696	8.7622	0.68129
Cytochrome b-c1 complex subunit 1, mitochondrial OS=Homo sapiens OX=9606 GN=UQCRC1 PE=1 SV=3	P31930	UQCRC1	53 kDa	5.9696	8.7622	0.68129
40S ribosomal protein S27 OS=Homo sapiens OX=9606 GN=RPS27 PE=1 SV=3	P42677	RPS27	9 kDa	5.9696	8.7622	0.68129
Protein disulfide-isomerase A6 OS=Homo sapiens OX=9606 GN=PDIA6 PE=1 SV=1	Q15084 (+4)	PDIA6	48 kDa	7.9595	11.683	0.681289
60S ribosomal protein L36 OS=Homo sapiens OX=9606 GN=RPL36 PE=1 SV=3	Q9Y3U8	RPL36	12 kDa	7.9595	11.683	0.681289
Titin OS=Homo sapiens OX=9606 GN=TTN PE=1 SV=1	A0A0A0MTS7 (+1)	TTN	3994 kDa	3.9797	5.8415	0.68128
Heterochromatin protein 1-binding protein 3 OS=Homo sapiens OX=9606 GN=HP1BP3 PE=1 SV=1	Q5SSJ5 (+1)	HP1BP3	61 kDa	3.9797	5.8415	0.68128
Isoform 2 of Eukaryotic peptide chain release factor GTP-binding subunit ERF3A OS=Homo sapiens OX=9606 GN=GSPT1	P15170-2 (+1)	GSPT1	69 kDa	3.9797	5.8415	0.68128
Fumarate hydratase, mitochondrial OS=Homo sapiens OX=9606 GN=FH PE=1 SV=3	P07954 (+1)	FH	55 kDa	3.9797	5.8415	0.68128
Calreticulin OS=Homo sapiens OX=9606 GN=CALR PE=1 SV=1	P27797	CALR	48 kDa	3.9797	5.8415	0.68128
ARF GTPase-activating protein GIT2 OS=Homo sapiens OX=9606 GN=GIT2 PE=1 SV=2	Q14161	GIT2	85 kDa	3.9797	5.8415	0.68128
Sister chromatid cohesion protein PDS5 homolog A OS=Homo sapiens OX=9606 GN=PDS5A PE=1 SV=1	Q29RF7	PDS5A	151 kDa	3.9797	5.8415	0.68128
N-terminal kinase-like protein OS=Homo sapiens OX=9606 GN=SCYL1 PE=1 SV=1	E9PK59 (+2)	SCYL1	86 kDa	3.9797	5.8415	0.68128
Myosin light polypeptide 6 OS=Homo sapiens OX=9606 GN=MYL6 PE=1 SV=1	B7Z6Z4 (+6)	MYL6	27 kDa	3.9797	5.8415	0.68128
DNA topoisomerase 1 OS=Homo sapiens OX=9606 GN=TOP1 PE=1 SV=2	P11387	TOP1	91 kDa	9.9494	14.604	0.681279
U1 small nuclear ribonucleoprotein 70 kDa OS=Homo sapiens OX=9606 GN=SNRNP70 PE=1 SV=2	P08621	SNRNP70	52 kDa	7.2962	10.953	0.666137
Regulator of nonsense transcripts 2 OS=Homo sapiens OX=9606 GN=UPF2 PE=1 SV=1	Q9HAU5	UPF2	148 kDa	7.2962	10.953	0.666137
General transcription factor 3C polypeptide 5 OS=Homo sapiens OX=9606 GN=GTF3C5 PE=1 SV=2	Q9Y5Q8 (+1)	GTF3C5	60 kDa	7.2962	10.953	0.666137
Delta-1-pyrroline-5-carboxylate synthase OS=Homo sapiens OX=9606 GN=ALDH18A1 PE=1 SV=2	P54886 (+1)	ALDH18A1	87 kDa	5.3063	8.0321	0.660637
Ras-related protein Rab-7a OS=Homo sapiens OX=9606 GN=RAB7A PE=1 SV=1	P51149	RAB7A	23 kDa	5.3063	8.0321	0.660637
Calpain-1 catalytic subunit OS=Homo sapiens OX=9606 GN=CAPN1 PE=1 SV=1	P07384	CAPN1	82 kDa	5.3063	8.0321	0.660637
Activating signal cointegrator 1 complex subunit 2 OS=Homo sapiens OX=9606 GN=ASCC2 PE=1 SV=3	Q9H1I8	ASCC2	86 kDa	5.3063	8.0321	0.660637
Mitochondrial proton/calcium exchanger protein OS=Homo sapiens OX=9606 GN=LETM1 PE=1 SV=1	O95202	LETM1	83 kDa	5.3063	8.0321	0.660637
Solute carrier family 2, facilitated glucose transporter member 3 OS=Homo sapiens OX=9606 GN=SLC2A3 PE=1 SV=1	P11169	SLC2A3	54 kDa	5.3063	8.0321	0.660637
Far upstream element-binding protein 2 OS=Homo sapiens OX=9606 GN=KHSRP PE=1 SV=1	A0A087WTP3 (+1)	KHSRP	73 kDa	5.3063	8.0321	0.660637
A-kinase anchor protein 9 OS=Homo sapiens OX=9606 GN=AKAP9 PE=1 SV=4	Q99996 (+1)	AKAP9	453 kDa	33.165	50.383	0.658258
ATP-binding cassette sub-family F member 1 OS=Homo sapiens OX=9606 GN=ABCF1 PE=1 SV=10	Q5STZ8 (+1)	ABCF1	96 kDa	17.246	26.287	0.656066
Mitochondrial import inner membrane translocase subunit TIM50 OS=Homo sapiens OX=9606 GN=TIMM50 PE=1 SV=2	Q3ZCQ8 (+1)	TIMM50	40 kDa	3.3165	5.1113	0.648856
Erlin-2 (Fragment) OS=Homo sapiens OX=9606 GN=ERLIN2 PE=1 SV=1	E5RHW4 (+1)	ERLIN2	38 kDa	3.3165	5.1113	0.648856
Proteasome subunit alpha type OS=Homo sapiens OX=9606 GN=PSMA6 PE=1 SV=1	G3V295 (+2)	PSMA6	23 kDa	3.3165	5.1113	0.648856
Nuclear RNA export factor 1 OS=Homo sapiens OX=9606 GN=NXF1 PE=1 SV=1	Q9UBU9	NXF1	70 kDa	3.3165	5.1113	0.648856
Small nuclear ribonucleoprotein Sm D2 OS=Homo sapiens OX=9606 GN=SNRPD2 PE=1 SV=1	P62316	SNRPD2	14 kDa	3.3165	5.1113	0.648856
DCN1-like protein 5 OS=Homo sapiens OX=9606 GN=DCUN1D5 PE=1 SV=1	Q9BTE7	DCUN1D5	28 kDa	3.3165	5.1113	0.648856
Small nuclear ribonucleoprotein Sm D3 OS=Homo sapiens OX=9606 GN=SNRPD3 PE=1 SV=1	P62318 (+1)	SNRPD3	14 kDa	3.3165	5.1113	0.648856
Transcription elongation factor SPT5 OS=Homo sapiens OX=9606 GN=SUPT5H PE=1 SV=1	O00267 (+1)	SUPT5H	121 kDa	3.3165	5.1113	0.648856
mRNA cap guanine-N7 methyltransferase OS=Homo sapiens OX=9606 GN=RNMT PE=1 SV=1	O43148 (+1)	RNMT	55 kDa	3.3165	5.1113	0.648856
High mobility group protein B2 OS=Homo sapiens OX=9606 GN=HMGB2 PE=1 SV=2	P26583	HMGB2	24 kDa	3.3165	5.1113	0.648856
Voltage-dependent anion-selective channel protein 1 OS=Homo sapiens OX=9606 GN=VDAC1 PE=1 SV=2	P21796	VDAC1	31 kDa	6.6329	10.223	0.648821
Serine/arginine-rich splicing factor 1 OS=Homo sapiens OX=9606 GN=SRSF1 PE=1 SV=1	J3KTL2 (+1)	SRSF1	28 kDa	14.592	22.636	0.644637
Nucleolar RNA helicase 2 OS=Homo sapiens OX=9606 GN=DDX21 PE=1 SV=5	Q9NR30	DDX21	87 kDa	15.919	24.826	0.641223
Eukaryotic initiation factor 4A-III OS=Homo sapiens OX=9606 GN=EIF4A3 PE=1 SV=4	P38919	EIF4A3	47 kDa	7.9595	12.413	0.641223
Heterogeneous nuclear ribonucleoprotein M OS=Homo sapiens OX=9606 GN=HNRNPM PE=1 SV=3	P52272 (+1)	HNRNPM	78 kDa	17.246	27.017	0.638339
Dynamin-2 OS=Homo sapiens OX=9606 GN=DNM2 PE=1 SV=2	P50570 (+2)	DNM2	98 kDa	4.643	7.3019	0.635862
Cell division cycle 2, G1 to S and G2 to M, isoform CRA_a OS=Homo sapiens OX=9606 GN=CDK1 PE=1 SV=1	A0A024QZP7 (+1)	CDK1	34 kDa	4.643	7.3019	0.635862
Ribosomal L1 domain-containing protein 1 OS=Homo sapiens OX=9606 GN=RSL1D1 PE=1 SV=3	O76021	RSL1D1	55 kDa	4.643	7.3019	0.635862
Pyruvate dehydrogenase E1 component subunit beta, mitochondrial OS=Homo sapiens OX=9606 GN=PDHB PE=1 SV=3	P11177 (+1)	PDHB	39 kDa	4.643	7.3019	0.635862
PDZ and LIM domain protein 5 OS=Homo sapiens OX=9606 GN=PDLIM5 PE=1 SV=5	Q96HC4	PDLIM5	64 kDa	4.643	7.3019	0.635862
General transcription factor 3C polypeptide 1 OS=Homo sapiens OX=9606 GN=GTF3C1 PE=1 SV=4	Q12789	GTF3C1	239 kDa	9.2861	14.604	0.63586
Insulin-like growth factor 2 mRNA-binding protein 3 OS=Homo sapiens OX=9606 GN=IGF2BP3 PE=1 SV=2	O00425	IGF2BP3	64 kDa	15.256	24.096	0.633134
Keratin, type II cytoskeletal 8 OS=Homo sapiens OX=9606 GN=KRT8 PE=1 SV=7	P05787 (+1)	KRT8	54 kDa	10.613	16.794	0.631952
Vacuolar protein sorting-associated protein 13C OS=Homo sapiens OX=9606 GN=VPS13C PE=1 SV=1	Q709C8 (+1)	VPS13C	422 kDa	10.613	16.794	0.631952
ELAV-like protein 1 OS=Homo sapiens OX=9606 GN=ELAVL1 PE=1 SV=2	Q15717 (+1)	ELAVL1	36 kDa	7.2962	11.683	0.624514
RNA-binding motif protein, X chromosome OS=Homo sapiens OX=9606 GN=RBMX PE=1 SV=3	P38159	RBMX	42 kDa	8.6228	13.874	0.621508
Elongation factor Tu, mitochondrial OS=Homo sapiens OX=9606 GN=TUFM PE=1 SV=2	P49411	TUFM	50 kDa	12.603	20.445	0.616434
Eukaryotic translation initiation factor 4 gamma 3 OS=Homo sapiens OX=9606 GN=EIF4G3 PE=1 SV=2	A0A0U1RQK7	EIF4G3	195 kDa	10.613	17.524	0.605627
DnaJ homolog subfamily C member 1 OS=Homo sapiens OX=9606 GN=DNAJC1 PE=1 SV=1	Q96KC8	DNAJC1	64 kDa	2.6532	4.3811	0.605601
Epidermal growth factor receptor kinase substrate 8-like protein 2 OS=Homo sapiens OX=9606 GN=EPS8L2 PE=1 SV=1	A0A3B3ISQ4 (+2)	EPS8L2	88 kDa	2.6532	4.3811	0.605601
Hsc70-interacting protein OS=Homo sapiens OX=9606 GN=ST13 PE=1 SV=2	P50502	ST13	41 kDa	2.6532	4.3811	0.605601
Epithelial splicing regulatory protein 1 OS=Homo sapiens OX=9606 GN=ESRP1 PE=1 SV=1	A0A2U3TZN9 (+5)	ESRP1	67 kDa	2.6532	4.3811	0.605601
ATP synthase subunit O, mitochondrial OS=Homo sapiens OX=9606 GN=ATP5PO PE=1 SV=1	P48047	ATP5PO	23 kDa	2.6532	4.3811	0.605601
DnaJ homolog subfamily C member 9 OS=Homo sapiens OX=9606 GN=DNAJC9 PE=1 SV=1	Q8WXX5	DNAJC9	30 kDa	2.6532	4.3811	0.605601
Mitochondrial import inner membrane translocase subunit TIM44 OS=Homo sapiens OX=9606 GN=TIMM44 PE=1 SV=2	O43615	TIMM44	51 kDa	2.6532	4.3811	0.605601
Peroxiredoxin-like 2A OS=Homo sapiens OX=9606 GN=PRXL2A PE=1 SV=3	Q9BRX8 (+1)	PRXL2A	26 kDa	2.6532	4.3811	0.605601
NADH-ubiquinone oxidoreductase 75 kDa subunit, mitochondrial OS=Homo sapiens OX=9606 GN=NDUFS1 PE=1 SV=1	B4DJ81 (+5)	NDUFS1	67 kDa	2.6532	4.3811	0.605601
Proton-translocating NAD(P)(+) transhydrogenase OS=Homo sapiens OX=9606 GN=NNT PE=1 SV=1	A0A590UK15 (+1)	NNT	108 kDa	2.6532	4.3811	0.605601
Serine/arginine repetitive matrix protein 2 OS=Homo sapiens OX=9606 GN=SRRM2 PE=1 SV=2	Q9UQ35	SRRM2	300 kDa	2.6532	4.3811	0.605601
Eukaryotic translation initiation factor 4E OS=Homo sapiens OX=9606 GN=EIF4E PE=1 SV=1	D6RBW1 (+3)	EIF4E	29 kDa	2.6532	4.3811	0.605601
Regulator of nonsense transcripts 3B OS=Homo sapiens OX=9606 GN=UPF3B PE=1 SV=1	Q9BZI7	UPF3B	58 kDa	2.6532	4.3811	0.605601
Heat shock protein 75 kDa, mitochondrial OS=Homo sapiens OX=9606 GN=TRAP1 PE=1 SV=3	Q12931 (+1)	TRAP1	80 kDa	5.3063	8.7622	0.60559
Transducin beta-like protein 2 OS=Homo sapiens OX=9606 GN=TBL2 PE=1 SV=1	E9PF19 (+1)	TBL2	46 kDa	5.3063	8.7622	0.60559
Electron transfer flavoprotein subunit alpha, mitochondrial OS=Homo sapiens OX=9606 GN=ETFA PE=1 SV=1	P13804	ETFA	35 kDa	5.3063	8.7622	0.60559
Bcl-2-associated transcription factor 1 OS=Homo sapiens OX=9606 GN=BCLAF1 PE=1 SV=1	A0A1W2PQ43 (+8)	BCLAF1	81 kDa	1.3266	2.1906	0.605588
Protein S100-A9 OS=Homo sapiens OX=9606 GN=S100A9 PE=1 SV=1	P06702	S100A9	13 kDa	1.3266	2.1906	0.605588
Fibrous sheath-interacting protein 2 OS=Homo sapiens OX=9606 GN=FSIP2 PE=2 SV=4	Q5CZC0	FSIP2	781 kDa	1.3266	2.1906	0.605588
Glucose-6-phosphate 1-dehydrogenase OS=Homo sapiens OX=9606 GN=G6PD PE=1 SV=4	P11413 (+2)	G6PD	59 kDa	1.3266	2.1906	0.605588
ATP-dependent zinc metalloprotease YME1L1 OS=Homo sapiens OX=9606 GN=YME1L1 PE=1 SV=1	Q96I63 (+3)	YME1L1	83 kDa	1.3266	2.1906	0.605588
Sorting nexin OS=Homo sapiens OX=9606 GN=SNX6 PE=1 SV=1	A0A0A0MRI2 (+1)	SNX6	48 kDa	1.3266	2.1906	0.605588
Kinesin-like protein KIF11 OS=Homo sapiens OX=9606 GN=KIF11 PE=4 SV=1	A0A7I2V3A9 (+1)	KIF11	112 kDa	1.3266	2.1906	0.605588
Caveolae-associated protein 1 OS=Homo sapiens OX=9606 GN=CAVIN1 PE=1 SV=1	Q6NZI2	CAVIN1	43 kDa	1.3266	2.1906	0.605588
Brain-specific angiogenesis inhibitor 1-associated protein 2 OS=Homo sapiens OX=9606 GN=BAIAP2 PE=1 SV=1	I3L4C2 (+6)	BAIAP2	61 kDa	1.3266	2.1906	0.605588
V-type proton ATPase subunit E 1 OS=Homo sapiens OX=9606 GN=ATP6V1E1 PE=1 SV=1	P36543	ATP6V1E1	26 kDa	1.3266	2.1906	0.605588
STIM1L OS=Homo sapiens OX=9606 GN=STIM1 PE=1 SV=1	G0XQ39 (+1)	STIM1	89 kDa	1.3266	2.1906	0.605588
Cystatin-A OS=Homo sapiens OX=9606 GN=CSTA PE=1 SV=1	P01040	CSTA	11 kDa	1.3266	2.1906	0.605588
Putative PDZ domain-containing protein PDZK1P1 OS=Homo sapiens OX=9606 GN=PDZK1P1 PE=5 SV=2	A8MUH7	PDZK1P1	44 kDa	1.3266	2.1906	0.605588
RRM domain-containing protein (Fragment) OS=Homo sapiens OX=9606 PE=4 SV=1	I3L521		17 kDa	1.3266	2.1906	0.605588
Occludin OS=Homo sapiens OX=9606 GN=OCLN PE=1 SV=1	A0A0G2JMZ8 (+2)	OCLN	59 kDa	1.3266	2.1906	0.605588
Phytanoyl-CoA dioxygenase, peroxisomal OS=Homo sapiens OX=9606 GN=PHYH PE=1 SV=1	B1ALH6 (+1)	PHYH	37 kDa	1.3266	2.1906	0.605588
UDP-glucuronosyltransferase 1-6 OS=Homo sapiens OX=9606 GN=UGT1A6 PE=1 SV=2	P19224 (+1)	UGT1A6	61 kDa	1.3266	2.1906	0.605588
p21-activated protein kinase-interacting protein 1 OS=Homo sapiens OX=9606 GN=PAK1IP1 PE=1 SV=2	Q9NWT1	PAK1IP1	44 kDa	1.3266	2.1906	0.605588
Mitogen-activated protein kinase kinase kinase 1 OS=Homo sapiens OX=9606 GN=MAP3K1 PE=1 SV=4	Q13233	MAP3K1	164 kDa	1.3266	2.1906	0.605588
Activated RNA polymerase II transcriptional coactivator p15 OS=Homo sapiens OX=9606 GN=SUB1 PE=1 SV=3	P53999	SUB1	14 kDa	1.3266	2.1906	0.605588
GTP-binding protein 10 OS=Homo sapiens OX=9606 GN=GTPBP10 PE=1 SV=1	A4D1E9	GTPBP10	43 kDa	1.3266	2.1906	0.605588
WASH complex subunit 4 OS=Homo sapiens OX=9606 GN=WASHC4 PE=1 SV=1	A0A087X256 (+1)	WASHC4	137 kDa	1.3266	2.1906	0.605588
ATP synthase subunit d, mitochondrial OS=Homo sapiens OX=9606 GN=ATP5PD PE=1 SV=3	O75947	ATP5PD	18 kDa	1.3266	2.1906	0.605588
SUMO-activating enzyme subunit 2 OS=Homo sapiens OX=9606 GN=UBA2 PE=1 SV=2	Q9UBT2	UBA2	71 kDa	1.3266	2.1906	0.605588
EKC/KEOPS complex subunit TP53RK OS=Homo sapiens OX=9606 GN=TP53RK PE=1 SV=2	Q96S44	TP53RK	28 kDa	1.3266	2.1906	0.605588
Ribonucleoside-diphosphate reductase large subunit OS=Homo sapiens OX=9606 GN=RRM1 PE=1 SV=1	E9PL69 (+1)	RRM1	65 kDa	1.3266	2.1906	0.605588
Rab11 family-interacting protein 1 OS=Homo sapiens OX=9606 GN=RAB11FIP1 PE=1 SV=3	Q6WKZ4	RAB11FIP1	137 kDa	1.3266	2.1906	0.605588
Arginine and glutamate-rich protein 1 OS=Homo sapiens OX=9606 GN=ARGLU1 PE=1 SV=1	Q9NWB6 (+2)	ARGLU1	33 kDa	1.3266	2.1906	0.605588
Protein ERGIC-53 OS=Homo sapiens OX=9606 GN=LMAN1 PE=1 SV=2	P49257	LMAN1	58 kDa	1.3266	2.1906	0.605588
Exosome complex component CSL4 OS=Homo sapiens OX=9606 GN=EXOSC1 PE=1 SV=1	B1AMU3 (+1)	EXOSC1	19 kDa	1.3266	2.1906	0.605588
V-type proton ATPase subunit H OS=Homo sapiens OX=9606 GN=ATP6V1H PE=1 SV=1	G3V126 (+1)	ATP6V1H	52 kDa	1.3266	2.1906	0.605588
CCR4-NOT transcription complex subunit 7 OS=Homo sapiens OX=9606 GN=CNOT7 PE=1 SV=3	Q9UIV1 (+1)	CNOT7	33 kDa	1.3266	2.1906	0.605588
Protein kinase C and casein kinase substrate in neurons protein 3 (Fragment) OS=Homo sapiens OX=9606 GN=PACSIN3 PE=1 SV=1	A0A0C4DGG1 (+1)	PACSIN3	46 kDa	1.3266	2.1906	0.605588
TPR repeat protein OS=Entamoeba histolytica HM-1:IMSS OX=294381 GN=EHI_091100 PE=4 SV=1	C4M7P7 (+2)	EHI_091100	107 kDa	1.3266	2.1906	0.605588
Delta(14)-sterol reductase LBR OS=Homo sapiens OX=9606 GN=LBR PE=1 SV=2	Q14739	LBR	71 kDa	1.3266	2.1906	0.605588
Nucleoporin Nup37 OS=Homo sapiens OX=9606 GN=NUP37 PE=1 SV=1	Q8NFH4	NUP37	37 kDa	3.9797	6.5717	0.605582
Inosine-5'-monophosphate dehydrogenase 2 OS=Homo sapiens OX=9606 GN=IMPDH2 PE=4 SV=1	A0A7I2V2T3 (+4)	IMPDH2	57 kDa	3.9797	6.5717	0.605582
Eukaryotic translation initiation factor 3 subunit K OS=Homo sapiens OX=9606 GN=EIF3K PE=1 SV=1	K7ERF1 (+3)	EIF3K	22 kDa	3.9797	6.5717	0.605582
ATP synthase subunit gamma, mitochondrial OS=Homo sapiens OX=9606 GN=ATP5F1C PE=1 SV=1	P36542 (+1)	ATP5F1C	33 kDa	3.9797	6.5717	0.605582
Thymocyte nuclear protein 1 OS=Homo sapiens OX=9606 GN=THYN1 PE=1 SV=1	Q9P016	THYN1	26 kDa	3.9797	6.5717	0.605582
Polypyrimidine tract-binding protein 3 OS=Homo sapiens OX=9606 GN=PTBP3 PE=1 SV=2	O95758 (+5)	PTBP3	60 kDa	3.9797	6.5717	0.605582
DNA replication licensing factor MCM5 OS=Homo sapiens OX=9606 GN=MCM5 PE=1 SV=5	P33992	MCM5	82 kDa	11.939	19.715	0.60558
Serine/arginine-rich splicing factor 2 OS=Homo sapiens OX=9606 GN=SRSF2 PE=1 SV=4	Q01130	SRSF2	25 kDa	6.6329	10.953	0.605578
Eukaryotic translation initiation factor 3 subunit H OS=Homo sapiens OX=9606 GN=EIF3H PE=1 SV=1	B3KS98 (+1)	EIF3H	42 kDa	7.2962	12.413	0.587787
Acetyl-CoA acetyltransferase, mitochondrial OS=Homo sapiens OX=9606 GN=ACAT1 PE=1 SV=1	P24752	ACAT1	45 kDa	5.9696	10.223	0.583938
28 kDa heat- and acid-stable phosphoprotein OS=Homo sapiens OX=9606 GN=PDAP1 PE=1 SV=1	Q13442	PDAP1	21 kDa	4.643	8.0321	0.578056
60 kDa poly(U)-binding-splicing factor (Fragment) OS=Homo sapiens OX=9606 GN=PUF60 PE=1 SV=1	A0A0J9YVP6 (+4)	PUF60	57 kDa	4.643	8.0321	0.578056
Serine/arginine-rich splicing factor 3 OS=Homo sapiens OX=9606 GN=SRSF3 PE=1 SV=1	P84103 (+1)	SRSF3	19 kDa	4.643	8.0321	0.578056
Malectin OS=Homo sapiens OX=9606 GN=MLEC PE=1 SV=1	Q14165	MLEC	32 kDa	4.643	8.0321	0.578056
Microtubule-associated protein RP/EB family member 1 OS=Homo sapiens OX=9606 GN=MAPRE1 PE=1 SV=3	Q15691	MAPRE1	30 kDa	4.643	8.0321	0.578056
APOBEC1 complementation factor OS=Homo sapiens OX=9606 GN=A1CF PE=1 SV=1	Q9NQ94 (+1)	A1CF	65 kDa	4.643	8.0321	0.578056
Isoform 2 of Apoptosis inhibitor 5 OS=Homo sapiens OX=9606 GN=API5	Q9BZZ5-2	API5	57 kDa	3.3165	5.8415	0.567748
Solute carrier family 2, facilitated glucose transporter member 1 OS=Homo sapiens OX=9606 GN=SLC2A1 PE=1 SV=2	P11166	SLC2A1	54 kDa	3.3165	5.8415	0.567748
DNA-(apurinic or apyrimidinic site) endonuclease (Fragment) OS=Homo sapiens OX=9606 GN=APEX1 PE=1 SV=1	G3V3M6 (+2)	APEX1	29 kDa	3.3165	5.8415	0.567748
Transmembrane emp24 domain-containing protein 2 (Fragment) OS=Homo sapiens OX=9606 GN=TMED2 PE=1 SV=2	E7EQ72 (+1)	TMED2	18 kDa	3.3165	5.8415	0.567748
UHRF1-binding protein 1-like OS=Homo sapiens OX=9606 GN=UHRF1BP1L PE=1 SV=2	A0JNW5	UHRF1BP1L	164 kDa	11.939	21.175	0.563825
Splicing factor, proline- and glutamine-rich OS=Homo sapiens OX=9606 GN=SFPQ PE=1 SV=2	P23246	SFPQ	76 kDa	8.6228	15.334	0.562332
Isoform 3 of Synaptic functional regulator FMR1 OS=Homo sapiens OX=9606 GN=FMR1	Q06787-4 (+2)	FMR1	68 kDa	7.2962	13.143	0.55514
DNA-directed RNA polymerase III subunit RPC2 OS=Homo sapiens OX=9606 GN=POLR3B PE=1 SV=2	Q9NW08	POLR3B	128 kDa	1.9899	3.6509	0.545044
Pre-mRNA-processing factor 31 OS=Homo sapiens OX=9606 GN=PRPF31 PE=1 SV=1	E7EVX8 (+1)	PRPF31	55 kDa	1.9899	3.6509	0.545044
Polymerase delta-interacting protein 3 OS=Homo sapiens OX=9606 GN=POLDIP3 PE=1 SV=1	F6VRR5 (+2)	POLDIP3	48 kDa	1.9899	3.6509	0.545044
Peptidyl-prolyl cis-trans isomerase FKBP3 OS=Homo sapiens OX=9606 GN=FKBP3 PE=1 SV=1	Q00688	FKBP3	25 kDa	1.9899	3.6509	0.545044
Nuclear valosin-containing protein-like OS=Homo sapiens OX=9606 GN=NVL PE=1 SV=1	O15381	NVL	95 kDa	1.9899	3.6509	0.545044
FACT complex subunit SSRP1 OS=Homo sapiens OX=9606 GN=SSRP1 PE=1 SV=1	Q08945	SSRP1	81 kDa	1.9899	3.6509	0.545044
Ras-related protein Rab-35 (Fragment) OS=Homo sapiens OX=9606 GN=RAB35 PE=1 SV=1	F5H157 (+1)	RAB35	21 kDa	1.9899	3.6509	0.545044
Ras-related protein Rab-21 OS=Homo sapiens OX=9606 GN=RAB21 PE=1 SV=3	Q9UL25	RAB21	24 kDa	1.9899	3.6509	0.545044
Alpha-soluble NSF attachment protein OS=Homo sapiens OX=9606 GN=NAPA PE=1 SV=3	P54920	NAPA	33 kDa	1.9899	3.6509	0.545044
Transcriptional activator protein Pur-beta OS=Homo sapiens OX=9606 GN=PURB PE=1 SV=3	Q96QR8	PURB	33 kDa	1.9899	3.6509	0.545044
Switch-associated protein 70 OS=Homo sapiens OX=9606 GN=SWAP70 PE=1 SV=1	E7EMB1 (+1)	SWAP70	62 kDa	1.9899	3.6509	0.545044
Acylglycerol kinase, mitochondrial OS=Homo sapiens OX=9606 GN=AGK PE=1 SV=2	Q53H12	AGK	47 kDa	1.9899	3.6509	0.545044
Protein DEK OS=Homo sapiens OX=9606 GN=DEK PE=1 SV=1	A0A494C028 (+4)	DEK	43 kDa	1.9899	3.6509	0.545044
Serine/threonine-protein kinase SMG1 OS=Homo sapiens OX=9606 GN=SMG1 PE=1 SV=3	Q96Q15	SMG1	410 kDa	1.9899	3.6509	0.545044
Heat shock protein 105 kDa OS=Homo sapiens OX=9606 GN=HSPH1 PE=1 SV=1	Q92598 (+1)	HSPH1	97 kDa	4.643	8.7622	0.52989
RNA-binding protein 4 OS=Homo sapiens OX=9606 GN=RBM4 PE=1 SV=1	Q9BWF3	RBM4	40 kDa	4.643	8.7622	0.52989
Apoptotic chromatin condensation inducer in the nucleus OS=Homo sapiens OX=9606 GN=ACIN1 PE=1 SV=2	E7EQT4 (+3)	ACIN1	147 kDa	2.6532	5.1113	0.519085
Zinc finger CCCH domain-containing protein 18 OS=Homo sapiens OX=9606 GN=ZC3H18 PE=1 SV=1	E7ERS3 (+1)	ZC3H18	109 kDa	2.6532	5.1113	0.519085
Protein disulfide-isomerase A5 OS=Homo sapiens OX=9606 GN=PDIA5 PE=1 SV=1	Q14554	PDIA5	60 kDa	2.6532	5.1113	0.519085
GTP-binding nuclear protein Ran OS=Homo sapiens OX=9606 GN=RAN PE=1 SV=1	B5MDF5 (+2)	RAN	26 kDa	2.6532	5.1113	0.519085
Beta-galactosidase OS=Homo sapiens OX=9606 GN=GLB1 PE=1 SV=2	P16278 (+1)	GLB1	76 kDa	2.6532	5.1113	0.519085
Hydroxysteroid dehydrogenase-like protein 2 OS=Homo sapiens OX=9606 GN=HSDL2 PE=1 SV=1	Q6YN16	HSDL2	45 kDa	2.6532	5.1113	0.519085
TAR DNA-binding protein 43 OS=Homo sapiens OX=9606 GN=TARDBP PE=1 SV=1	Q13148	TARDBP	45 kDa	2.6532	5.1113	0.519085
ATP-dependent Clp protease ATP-binding subunit clpX-like, mitochondrial OS=Homo sapiens OX=9606 GN=CLPX PE=1 SV=2	O76031	CLPX	69 kDa	2.6532	5.1113	0.519085
Isoform 2 of Caseinolytic peptidase B protein homolog OS=Homo sapiens OX=9606 GN=CLPB	Q9H078-2	CLPB	75 kDa	2.6532	5.1113	0.519085
ATP-dependent RNA helicase DDX50 OS=Homo sapiens OX=9606 GN=DDX50 PE=1 SV=1	Q9BQ39	DDX50	83 kDa	2.6532	5.1113	0.519085
Dedicator of cytokinesis protein 7 OS=Homo sapiens OX=9606 GN=DOCK7 PE=1 SV=4	Q96N67 (+5)	DOCK7	243 kDa	5.3063	10.223	0.519055
Spectrin beta chain OS=Homo sapiens OX=9606 GN=SPTBN1 PE=1 SV=1	A0A087WUZ3 (+1)	SPTBN1	275 kDa	5.3063	10.223	0.519055
EH domain-containing protein 1 OS=Homo sapiens OX=9606 GN=EHD1 PE=1 SV=1	A0A024R571 (+1)	EHD1	62 kDa	3.3165	6.5717	0.504664
Kinesin-like protein KIF2C OS=Homo sapiens OX=9606 GN=KIF2C PE=1 SV=2	Q99661 (+1)	KIF2C	81 kDa	3.3165	6.5717	0.504664
Mitochondrial import receptor subunit TOM70 OS=Homo sapiens OX=9606 GN=TOMM70 PE=1 SV=1	O94826	TOMM70	67 kDa	3.9797	8.0321	0.495474
U2 small nuclear ribonucleoprotein A' OS=Homo sapiens OX=9606 GN=SNRPA1 PE=1 SV=2	P09661	SNRPA1	28 kDa	3.9797	8.0321	0.495474
Spectrin alpha chain, non-erythrocytic 1 OS=Homo sapiens OX=9606 GN=SPTAN1 PE=1 SV=1	A0A0D9SF54 (+4)	SPTAN1	283 kDa	4.643	9.4924	0.489128
OMPdecase OS=Homo sapiens OX=9606 GN=UMPS PE=1 SV=1	E9PFD2 (+1)	UMPS	38 kDa	1.3266	2.9207	0.454206
Pericentriolar material 1 protein OS=Homo sapiens OX=9606 GN=PCM1 PE=4 SV=1	A0A4W8VX11 (+5)	PCM1	210 kDa	1.3266	2.9207	0.454206
40S ribosomal protein S21 OS=Homo sapiens OX=9606 GN=RPS21 PE=1 SV=1	P63220 (+1)	RPS21	9 kDa	1.3266	2.9207	0.454206
Mitochondrial ribosome-associated GTPase 1 OS=Homo sapiens OX=9606 GN=MTG1 PE=1 SV=2	Q9BT17 (+1)	MTG1	37 kDa	1.3266	2.9207	0.454206
39S ribosomal protein L1, mitochondrial OS=Homo sapiens OX=9606 GN=MRPL1 PE=1 SV=2	Q9BYD6	MRPL1	37 kDa	1.3266	2.9207	0.454206
Succinate--CoA ligase [GDP-forming] subunit beta, mitochondrial OS=Homo sapiens OX=9606 GN=SUCLG2 PE=1 SV=1	E9PDQ8 (+2)	SUCLG2	41 kDa	1.3266	2.9207	0.454206
RNA helicase OS=Homo sapiens OX=9606 GN=DDX56 PE=1 SV=1	G3V0G3 (+3)	DDX56	42 kDa	1.3266	2.9207	0.454206
Gamma-tubulin complex component 3 OS=Homo sapiens OX=9606 GN=TUBGCP3 PE=1 SV=2	Q96CW5 (+1)	TUBGCP3	104 kDa	1.3266	2.9207	0.454206
Mitochondrial amidoxime-reducing component 1 OS=Homo sapiens OX=9606 GN=MTARC1 PE=1 SV=1	Q5VT66 (+1)	MTARC1	38 kDa	1.3266	2.9207	0.454206
28S ribosomal protein S34, mitochondrial OS=Homo sapiens OX=9606 GN=MRPS34 PE=1 SV=2	C9JJ19 (+1)	MRPS34	26 kDa	1.3266	2.9207	0.454206
NADPH:adrenodoxin oxidoreductase, mitochondrial OS=Homo sapiens OX=9606 GN=FDXR PE=1 SV=1	A0A0A0MSZ4 (+10)	FDXR	57 kDa	1.3266	2.9207	0.454206
DISP complex protein LRCH3 OS=Homo sapiens OX=9606 GN=LRCH3 PE=1 SV=2	Q96II8 (+2)	LRCH3	86 kDa	1.3266	2.9207	0.454206
Phosphatidylglycerophosphatase and protein-tyrosine phosphatase 1 OS=Homo sapiens OX=9606 GN=PTPMT1 PE=1 SV=1	Q8WUK0	PTPMT1	23 kDa	1.3266	2.9207	0.454206
Tight junction protein 1 (Zona occludens 1), isoform CRA_a OS=Homo sapiens OX=9606 GN=TJP1 PE=1 SV=2	A0A087X0K9 (+6)	TJP1	197 kDa	1.3266	2.9207	0.454206
Protein FAM133B OS=Homo sapiens OX=9606 GN=FAM133B PE=1 SV=1	G3XAI9 (+1)	FAM133B	12 kDa	1.3266	2.9207	0.454206
39S ribosomal protein L48, mitochondrial OS=Homo sapiens OX=9606 GN=MRPL48 PE=1 SV=1	F5H702 (+2)	MRPL48	13 kDa	1.3266	2.9207	0.454206
Hydroxyacyl-coenzyme A dehydrogenase, mitochondrial OS=Homo sapiens OX=9606 GN=HADH PE=1 SV=2	A0A0A0MSE2 (+5)	HADH	35 kDa	1.3266	2.9207	0.454206
OTU domain-containing protein 4 OS=Homo sapiens OX=9606 GN=OTUD4 PE=1 SV=4	Q01804	OTUD4	124 kDa	1.9899	4.3811	0.454201
Helicase, lymphoid-specific, isoform CRA_b OS=Homo sapiens OX=9606 GN=HELLS PE=1 SV=1	A0A0B4J1V9 (+6)	HELLS	103 kDa	1.9899	4.3811	0.454201
Actin-related protein 2/3 complex subunit 4 OS=Homo sapiens OX=9606 GN=ARPC4-TTLL3 PE=3 SV=1	F8WCF6 (+2)	ARPC4-TTLL3	21 kDa	1.9899	4.3811	0.454201
High mobility group protein B1 OS=Homo sapiens OX=9606 GN=HMGB1 PE=1 SV=3	P09429 (+1)	HMGB1	25 kDa	1.9899	4.3811	0.454201
Nuclear cap-binding protein subunit 1 OS=Homo sapiens OX=9606 GN=NCBP1 PE=1 SV=1	Q09161	NCBP1	92 kDa	1.9899	4.3811	0.454201
CD2-associated protein OS=Homo sapiens OX=9606 GN=CD2AP PE=1 SV=1	Q9Y5K6	CD2AP	71 kDa	1.9899	4.3811	0.454201
rRNA 2'-O-methyltransferase fibrillarin (Fragment) OS=Homo sapiens OX=9606 GN=FBL PE=1 SV=1	M0QXL5 (+2)	FBL	27 kDa	1.9899	4.3811	0.454201
Non-specific serine/threonine protein kinase OS=Homo sapiens OX=9606 GN=RPS6KA3 PE=1 SV=2	B1AXG1 (+3)	RPS6KA3	81 kDa	1.9899	4.3811	0.454201
Abl interactor 1 OS=Homo sapiens OX=9606 GN=ABI1 PE=1 SV=1	A0A0A0MRT6 (+7)	ABI1	52 kDa	1.9899	4.3811	0.454201
Rho-related GTP-binding protein RhoG OS=Homo sapiens OX=9606 GN=RHOG PE=1 SV=1	P84095	RHOG	21 kDa	1.9899	4.3811	0.454201
Probable ATP-dependent RNA helicase DDX47 OS=Homo sapiens OX=9606 GN=DDX47 PE=1 SV=1	Q9H0S4	DDX47	51 kDa	1.9899	4.3811	0.454201
Ubiquitin carboxyl-terminal hydrolase 7 OS=Homo sapiens OX=9606 GN=USP7 PE=1 SV=1	A0A669KBL1 (+2)	USP7	132 kDa	1.9899	4.3811	0.454201
28S ribosomal protein S9, mitochondrial OS=Homo sapiens OX=9606 GN=MRPS9 PE=1 SV=2	P82933	MRPS9	46 kDa	1.9899	4.3811	0.454201
Sulfide:quinone oxidoreductase, mitochondrial OS=Homo sapiens OX=9606 GN=SQOR PE=1 SV=1	Q9Y6N5	SQOR	50 kDa	2.6532	5.8415	0.454198
Probable ATP-dependent RNA helicase DDX28 OS=Homo sapiens OX=9606 GN=DDX28 PE=1 SV=2	Q9NUL7	DDX28	60 kDa	2.6532	5.8415	0.454198
Flap endonuclease 1 OS=Homo sapiens OX=9606 GN=FEN1 PE=1 SV=1	P39748	FEN1	43 kDa	3.9797	8.7622	0.45419
Serine/arginine-rich splicing factor 5 OS=Homo sapiens OX=9606 GN=SRSF5 PE=1 SV=1	Q13243	SRSF5	31 kDa	4.643	10.223	0.454172
Isoform 3 of Heterogeneous nuclear ribonucleoprotein A/B OS=Homo sapiens OX=9606 GN=HNRNPAB	Q99729-3	HNRNPAB	31 kDa	1.9899	5.1113	0.389314
RNA helicase OS=Homo sapiens OX=9606 GN=DDX24 PE=1 SV=1	G3V529 (+1)	DDX24	91 kDa	1.9899	5.1113	0.389314
DNA (cytosine-5)-methyltransferase 1 OS=Homo sapiens OX=9606 GN=DNMT1 PE=4 SV=1	A0A7I2V490 (+6)	DNMT1	187 kDa	1.9899	5.1113	0.389314
Lariat debranching enzyme OS=Homo sapiens OX=9606 GN=DBR1 PE=1 SV=2	Q9UK59	DBR1	62 kDa	1.3266	3.6509	0.363362
Replication factor C subunit 3 OS=Homo sapiens OX=9606 GN=RFC3 PE=1 SV=2	P40938	RFC3	41 kDa	1.3266	3.6509	0.363362
Probable proline--tRNA ligase, mitochondrial OS=Homo sapiens OX=9606 GN=PARS2 PE=1 SV=1	Q7L3T8	PARS2	53 kDa	1.3266	3.6509	0.363362
TBC1 domain family member 31 OS=Homo sapiens OX=9606 GN=TBC1D31 PE=1 SV=1	E7ERK7 (+4)	TBC1D31	113 kDa	1.3266	3.6509	0.363362
RNA polymerase-associated protein RTF1 homolog OS=Homo sapiens OX=9606 GN=RTF1 PE=1 SV=4	Q92541	RTF1	80 kDa	1.3266	3.6509	0.363362
2-hydroxyacyl-CoA lyase 1 OS=Homo sapiens OX=9606 GN=HACL1 PE=1 SV=2	Q9UJ83 (+2)	HACL1	64 kDa	1.3266	3.6509	0.363362
Rho-associated protein kinase 2 OS=Homo sapiens OX=9606 GN=ROCK2 PE=1 SV=1	E9PF63 (+1)	ROCK2	133 kDa	1.3266	3.6509	0.363362
Protein transport protein SEC23 OS=Homo sapiens OX=9606 GN=SEC23B PE=1 SV=1	A0A2R8YFH5 (+1)	SEC23B	84 kDa	1.3266	3.6509	0.363362
GTP-binding protein Rheb OS=Homo sapiens OX=9606 GN=RHEB PE=1 SV=1	Q15382	RHEB	20 kDa	1.3266	3.6509	0.363362
Nck-associated protein 1 OS=Homo sapiens OX=9606 GN=NCKAP1 PE=1 SV=1	Q9Y2A7 (+1)	NCKAP1	129 kDa	3.3165	9.4924	0.349385
Albumin OS=Homo sapiens OX=9606 GN=ALB PE=1 SV=2	P02768	ALB	69 kDa	6.6329	19.715	0.336439
Signal recognition particle 54 kDa protein OS=Homo sapiens OX=9606 GN=SRP54 PE=1 SV=1	P61011 (+1)	SRP54	56 kDa	2.6532	8.0321	0.330325
Alpha-2-HS-glycoprotein OS=Homo sapiens OX=9606 GN=AHSG PE=1 SV=2	P02765	AHSG	39 kDa	1.3266	4.3811	0.302801
N-acylneuraminate cytidylyltransferase OS=Homo sapiens OX=9606 GN=CMAS PE=1 SV=2	Q8NFW8	CMAS	48 kDa	1.3266	4.3811	0.302801
Rho guanine nucleotide exchange factor 7 OS=Homo sapiens OX=9606 GN=ARHGEF7 PE=1 SV=1	A0A2R8YG42 (+3)	ARHGEF7	97 kDa	1.3266	4.3811	0.302801
Protein LTV1 homolog OS=Homo sapiens OX=9606 GN=LTV1 PE=1 SV=1	Q96GA3	LTV1	55 kDa	1.3266	4.3811	0.302801
Peroxiredoxin-2 OS=Homo sapiens OX=9606 GN=PRDX2 PE=1 SV=5	P32119	PRDX2	22 kDa	1.3266	5.1113	0.259543
BICD1 protein OS=Homo sapiens OX=9606 GN=BICD1 PE=1 SV=3	A8MVZ6 (+3)	BICD1	95 kDa	1.3266	5.1113	0.259543
Keratin, type II cytoskeletal 6B OS=Homo sapiens OX=9606 GN=KRT6B PE=1 SV=5	P04259	KRT6B	60 kDa	0	20.445	0
Keratin, type II cytoskeletal 1b OS=Homo sapiens OX=9606 GN=KRT77 PE=1 SV=3	Q7Z794	KRT77	62 kDa	0	12.413	0
Keratin, type I cytoskeletal 19 OS=Homo sapiens OX=9606 GN=KRT19 PE=1 SV=4	P08727	KRT19	44 kDa	0	8.7622	0
Tubulin beta-2A chain OS=Homo sapiens OX=9606 GN=TUBB2A PE=1 SV=1	Q13885	TUBB2A	50 kDa	0	14.604	0
Tubulin beta-3 chain OS=Homo sapiens OX=9606 GN=TUBB3 PE=1 SV=2	Q13509	TUBB3	50 kDa	0	10.223	0
Keratin, type II cytoskeletal 7 OS=Homo sapiens OX=9606 GN=KRT7 PE=1 SV=5	P08729	KRT7	51 kDa	0	5.1113	0
Keratin, type II cytoskeletal 72 OS=Homo sapiens OX=9606 GN=KRT72 PE=1 SV=2	Q14CN4 (+1)	KRT72	56 kDa	0	2.9207	0
Ras-related protein Rab-1B OS=Homo sapiens OX=9606 GN=RAB1B PE=1 SV=1	Q9H0U4	RAB1B	22 kDa	0	3.6509	0
Plakophilin-1 OS=Homo sapiens OX=9606 GN=PKP1 PE=1 SV=2	Q13835 (+1)	PKP1	83 kDa	0	1.4604	0
Serine/threonine-protein kinase 26 OS=Homo sapiens OX=9606 GN=STK26 PE=1 SV=1	B4E0Y9 (+2)	STK26	49 kDa	0	4.3811	0
Plectin OS=Homo sapiens OX=9606 GN=PLEC PE=1 SV=3	Q15149	PLEC	532 kDa	0	5.1113	0
TGc domain-containing protein OS=Homo sapiens OX=9606 PE=3 SV=1	A0A494C0J7 (+1)		79 kDa	0	1.4604	0
Ubiquitin carboxyl-terminal hydrolase 33 OS=Homo sapiens OX=9606 GN=USP33 PE=1 SV=2	Q8TEY7	USP33	107 kDa	0	3.6509	0
Transformer-2 protein homolog alpha OS=Homo sapiens OX=9606 GN=TRA2A PE=1 SV=1	Q13595	TRA2A	33 kDa	0	4.3811	0
VPS10 domain-containing receptor SorCS2 OS=Homo sapiens OX=9606 GN=SORCS2 PE=1 SV=4	B5MED8 (+1)	SORCS2	111 kDa	0	2.1906	0
Fatty acid-binding protein 5 OS=Homo sapiens OX=9606 GN=FABP5 PE=1 SV=3	Q01469	FABP5	15 kDa	0	1.4604	0
60S ribosomal protein L35 OS=Homo sapiens OX=9606 GN=RPL35 PE=1 SV=2	P42766	RPL35	15 kDa	0	3.6509	0
28S ribosomal protein S7, mitochondrial OS=Homo sapiens OX=9606 GN=MRPS7 PE=1 SV=1	J3QLS3 (+1)	MRPS7	32 kDa	0	2.1906	0
14-3-3 protein 2 OS=Entamoeba histolytica HM-1:IMSS OX=294381 GN=EHI_098280 PE=3 SV=1	C4LXB1 (+2)	EHI_098280	28 kDa	0	2.9207	0
Lamin-B1 OS=Homo sapiens OX=9606 GN=LMNB1 PE=1 SV=2	P20700	LMNB1	66 kDa	0	5.8415	0
WASH complex subunit 5 OS=Homo sapiens OX=9606 GN=WASHC5 PE=1 SV=1	E7EQI7 (+1)	WASHC5	117 kDa	0	2.1906	0
Nucleosome assembly protein 1-like 1 OS=Homo sapiens OX=9606 GN=NAP1L1 PE=1 SV=1	B7Z9C2 (+13)	NAP1L1	41 kDa	0	2.9207	0
NACHT, LRR and PYD domains-containing protein 2 OS=Homo sapiens OX=9606 GN=NLRP2 PE=1 SV=1	A0A0G2JMG8 (+3)	NLRP2	118 kDa	0	3.6509	0
DNA repair protein XRCC1 OS=Homo sapiens OX=9606 GN=XRCC1 PE=1 SV=2	F5H8D7 (+1)	XRCC1	66 kDa	0	2.1906	0
Arginase-1 OS=Homo sapiens OX=9606 GN=ARG1 PE=1 SV=1	A0A5F9ZH78 (+2)	ARG1	26 kDa	0	1.4604	0
[truncated: 202 more rows]

## Sheet: Trial 2
Table S4. HA-KERP2 interactome in Caco-2
Trial 2
Identified Proteins (1844/1877)	Accession Number	Alternate ID	Molecular Weight	HAKERP2	HAmock	FC
Keratin, type I cytoskeletal 13 OS=Homo sapiens OX=9606 GN=KRT13 PE=1 SV=4	P13646	KRT13	50 kDa	21.579	0	#DIV/0!
Keratin, type II cytoskeletal 4 OS=Homo sapiens OX=9606 GN=KRT4 PE=1 SV=5	P19013	KRT4	56 kDa	14.939	0	#DIV/0!
TNase-like domain-containing protein OS=Entamoeba histolytica OX=5759 GN=EHI_005150 PE=4 SV=1	C4M0A8	EHI_005150	99 kDa	14.11	0	#DIV/0!
Keratin, type I cytoskeletal 27 OS=Homo sapiens OX=9606 GN=KRT27 PE=1 SV=2	Q7Z3Y8	KRT27	50 kDa	12.45	0	#DIV/0!
Tubulin beta-3 chain OS=Homo sapiens OX=9606 GN=TUBB3 PE=1 SV=2	Q13509	TUBB3	50 kDa	12.45	0	#DIV/0!
Actin OS=Entamoeba histolytica OX=5759 GN=EHI_107290 PE=2 SV=1	B1N2P0	EHI_107290	42 kDa	11.62	0	#DIV/0!
Tubulin beta-6 chain OS=Homo sapiens OX=9606 GN=TUBB6 PE=1 SV=1	Q9BUF5	TUBB6	50 kDa	9.9596	0	#DIV/0!
Uncharacterized protein OS=Entamoeba histolytica OX=5759 GN=EHI_065630 PE=4 SV=1	C4LZX9	EHI_065630	27 kDa	9.9596	0	#DIV/0!
Uncharacterized protein OS=Entamoeba histolytica OX=5759 GN=EHI_160980 PE=2 SV=1	C4M2R6	EHI_160980	34 kDa	9.1297	0	#DIV/0!
40S ribosomal protein S2, putative OS=Entamoeba histolytica OX=5759 GN=EHI_020280 PE=2 SV=1	C4M7U0	EHI_020280	28 kDa	8.2997	0	#DIV/0!
60S ribosomal protein L10, putative OS=Entamoeba histolytica OX=5759 GN=EHI_044810 PE=2 SV=1	C4LTA0	EHI_044810	24 kDa	6.6398	0	#DIV/0!
Zinc finger CCHC domain-containing protein 8 OS=Homo sapiens OX=9606 GN=ZCCHC8 PE=1 SV=2	Q6NZY4	ZCCHC8	79 kDa	6.6398	0	#DIV/0!
Double-stranded RNA-specific adenosine deaminase OS=Homo sapiens OX=9606 GN=ADAR PE=1 SV=4	P55265 (+2)	ADAR	136 kDa	6.6398	0	#DIV/0!
40S ribosomal protein S13, putative OS=Entamoeba histolytica OX=5759 GN=EHI_035460 PE=3 SV=1	A0A175JJM9 (+1)	EHI_035460	17 kDa	6.6398	0	#DIV/0!
Pumilio homolog 2 (Fragment) OS=Homo sapiens OX=9606 GN=PUM2 PE=1 SV=1	A0A0C4DG68 (+2)	PUM2	94 kDa	6.6398	0	#DIV/0!
40S ribosomal protein S4, putative OS=Entamoeba histolytica OX=5759 GN=EHI_118170 PE=3 SV=1	B1N336 (+1)	EHI_118170	36 kDa	6.6398	0	#DIV/0!
60S ribosomal protein L4, putative OS=Entamoeba histolytica OX=5759 GN=EHI_000510 PE=3 SV=1	C4LZA2	EHI_000510	47 kDa	6.6398	0	#DIV/0!
Structural maintenance of chromosomes protein OS=Homo sapiens OX=9606 GN=SMC4 PE=1 SV=1	E9PD53 (+1)	SMC4	144 kDa	6.6398	0	#DIV/0!
Parafibromin OS=Homo sapiens OX=9606 GN=CDC73 PE=1 SV=1	Q6P1J9	CDC73	61 kDa	6.6398	0	#DIV/0!
ATP-dependent 6-phosphofructokinase, liver type OS=Homo sapiens OX=9606 GN=PFKL PE=1 SV=6	P17858	PFKL	85 kDa	5.8098	0	#DIV/0!
Transformer-2 protein homolog alpha OS=Homo sapiens OX=9606 GN=TRA2A PE=1 SV=1	Q13595	TRA2A	33 kDa	5.8098	0	#DIV/0!
60S ribosomal protein L3, putative OS=Entamoeba histolytica OX=5759 GN=EHI_005890 PE=2 SV=1	C4LW09	EHI_005890	46 kDa	5.8098	0	#DIV/0!
60S ribosomal protein L13, putative OS=Entamoeba histolytica OX=5759 GN=EHI_187150 PE=2 SV=1	C4LVT2	EHI_187150	33 kDa	5.8098	0	#DIV/0!
60S ribosomal protein L24, putative OS=Entamoeba histolytica OX=5759 GN=EHI_030760 PE=3 SV=1	C4LSA0	EHI_030760	19 kDa	5.8098	0	#DIV/0!
40S ribosomal protein S11, putative OS=Entamoeba histolytica OX=5759 GN=EHI_155410 PE=2 SV=1	C4LW92	EHI_155410	18 kDa	5.8098	0	#DIV/0!
40S ribosomal protein S16, putative OS=Entamoeba histolytica OX=5759 GN=EHI_008010 PE=3 SV=1	B1N316 (+2)	EHI_008010	17 kDa	5.8098	0	#DIV/0!
DNA repair protein RAD50 OS=Homo sapiens OX=9606 GN=RAD50 PE=1 SV=1	Q92878 (+1)	RAD50	154 kDa	4.9798	0	#DIV/0!
Protein transport protein Sec31A OS=Homo sapiens OX=9606 GN=SEC31A PE=1 SV=1	D6REX3 (+8)	SEC31A	136 kDa	4.9798	0	#DIV/0!
40S ribosomal protein S3, putative OS=Entamoeba histolytica OX=5759 GN=EHI_146340 PE=2 SV=1	C4LT02	EHI_146340	27 kDa	4.9798	0	#DIV/0!
Nuclear cap-binding protein subunit 1 OS=Homo sapiens OX=9606 GN=NCBP1 PE=1 SV=1	Q09161	NCBP1	92 kDa	4.9798	0	#DIV/0!
Replication protein A 70 kDa DNA-binding subunit OS=Homo sapiens OX=9606 GN=RPA1 PE=1 SV=2	P27694	RPA1	68 kDa	4.9798	0	#DIV/0!
40S ribosomal protein S8 OS=Entamoeba histolytica OX=5759 GN=EHI_009870 PE=2 SV=1	C4M0Q2 (+2)	EHI_009870	27 kDa	4.9798	0	#DIV/0!
40S ribosomal protein S14, putative OS=Entamoeba histolytica OX=5759 GN=EHI_012360 PE=3 SV=1	B1N2I3	EHI_012360	16 kDa	4.9798	0	#DIV/0!
WD repeat-containing protein 61 (Fragment) OS=Homo sapiens OX=9606 GN=WDR61 PE=1 SV=1	H0YN81 (+1)	WDR61	32 kDa	4.9798	0	#DIV/0!
Probable ubiquitin carboxyl-terminal hydrolase FAF-X OS=Homo sapiens OX=9606 GN=USP9X PE=1 SV=4	Q93008 (+1)	USP9X	290 kDa	4.9798	0	#DIV/0!
SWI/SNF-related matrix-associated actin-dependent regulator of chromatin subfamily A member 5 OS=Homo sapiens OX=9606 GN=SMARCA5 PE=1 SV=1	O60264	SMARCA5	122 kDa	4.9798	0	#DIV/0!
60S ribosomal protein L13, putative OS=Entamoeba histolytica OX=5759 GN=EHI_017700 PE=2 SV=1	C4M3F3	EHI_017700	23 kDa	4.9798	0	#DIV/0!
Protein bicaudal C homolog 1 OS=Homo sapiens OX=9606 GN=BICC1 PE=1 SV=2	Q9H694	BICC1	105 kDa	4.9798	0	#DIV/0!
RNA polymerase-associated protein CTR9 homolog OS=Homo sapiens OX=9606 GN=CTR9 PE=1 SV=1	Q6PD62	CTR9	134 kDa	4.9798	0	#DIV/0!
U4/U6.U5 tri-snRNP-associated protein 1 OS=Homo sapiens OX=9606 GN=SART1 PE=1 SV=1	O43290	SART1	90 kDa	4.1499	0	#DIV/0!
26S proteasome non-ATPase regulatory subunit 12 OS=Homo sapiens OX=9606 GN=PSMD12 PE=1 SV=3	O00232	PSMD12	53 kDa	4.1499	0	#DIV/0!
UHRF1-binding protein 1-like OS=Homo sapiens OX=9606 GN=UHRF1BP1L PE=1 SV=2	A0JNW5	UHRF1BP1L	164 kDa	4.1499	0	#DIV/0!
Catenin beta-1 OS=Homo sapiens OX=9606 GN=CTNNB1 PE=1 SV=1	A0A2R8Y5A3 (+6)	CTNNB1	86 kDa	4.1499	0	#DIV/0!
Polymerase delta-interacting protein 3 OS=Homo sapiens OX=9606 GN=POLDIP3 PE=1 SV=2	Q9BY77	POLDIP3	46 kDa	4.1499	0	#DIV/0!
Ribosomal protein L23A, putative OS=Entamoeba histolytica OX=5759 GN=EHI_182850 PE=3 SV=1	C4LV64	EHI_182850	14 kDa	4.1499	0	#DIV/0!
40S ribosomal protein S9 OS=Entamoeba histolytica OX=5759 GN=EHI_179000 PE=2 SV=1	C4LUW3 (+1)	EHI_179000	21 kDa	4.1499	0	#DIV/0!
Pre-mRNA-processing factor 40 homolog A OS=Homo sapiens OX=9606 GN=PRPF40A PE=4 SV=1	A0A7N4I394	PRPF40A	112 kDa	4.1499	0	#DIV/0!
Dedicator of cytokinesis protein 7 OS=Homo sapiens OX=9606 GN=DOCK7 PE=1 SV=4	Q96N67 (+5)	DOCK7	243 kDa	4.1499	0	#DIV/0!
RNA helicase OS=Homo sapiens OX=9606 GN=DDX24 PE=1 SV=1	G3V529 (+1)	DDX24	91 kDa	4.1499	0	#DIV/0!
Calponin-3 OS=Homo sapiens OX=9606 GN=CNN3 PE=1 SV=1	Q15417 (+1)	CNN3	36 kDa	4.1499	0	#DIV/0!
Ras-related C3 botulinum toxin substrate 1 OS=Homo sapiens OX=9606 GN=RAC1 PE=1 SV=1	P63000 (+1)	RAC1	21 kDa	4.1499	0	#DIV/0!
40S ribosomal protein S24, putative OS=Entamoeba histolytica OX=5759 GN=EHI_148820 PE=3 SV=1	C4LT49 (+1)	EHI_148820	16 kDa	4.1499	0	#DIV/0!
RNA polymerase II-associated factor 1 homolog OS=Homo sapiens OX=9606 GN=PAF1 PE=1 SV=2	Q8N7H5 (+1)	PAF1	60 kDa	4.1499	0	#DIV/0!
Dihydrolipoyl dehydrogenase OS=Homo sapiens OX=9606 GN=DLD PE=1 SV=1	E9PEX6 (+1)	DLD	52 kDa	4.1499	0	#DIV/0!
A-kinase anchor protein 1, mitochondrial OS=Homo sapiens OX=9606 GN=AKAP1 PE=1 SV=1	Q92667	AKAP1	97 kDa	4.1499	0	#DIV/0!
Probable helicase with zinc finger domain OS=Homo sapiens OX=9606 GN=HELZ PE=1 SV=1	J3QS41 (+1)	HELZ	219 kDa	4.1499	0	#DIV/0!
Coiled-coil domain-containing protein 86 OS=Homo sapiens OX=9606 GN=CCDC86 PE=1 SV=1	Q9H6F5	CCDC86	40 kDa	4.1499	0	#DIV/0!
Scaffold attachment factor B1 OS=Homo sapiens OX=9606 GN=SAFB PE=1 SV=4	Q15424 (+3)	SAFB	103 kDa	4.1499	0	#DIV/0!
Cleavage and polyadenylation specificity factor subunit 6 OS=Homo sapiens OX=9606 GN=CPSF6 PE=1 SV=1	F8WJN3 (+3)	CPSF6	52 kDa	4.1499	0	#DIV/0!
Uncharacterized protein OS=Entamoeba histolytica OX=5759 GN=EHI_198680 PE=4 SV=1	C4LWR4	EHI_198680	28 kDa	4.1499	0	#DIV/0!
Helicase SKI2W OS=Homo sapiens OX=9606 GN=SKIV2L PE=1 SV=3	Q15477	SKIV2L	138 kDa	3.3199	0	#DIV/0!
ATP-dependent 6-phosphofructokinase OS=Homo sapiens OX=9606 GN=PFKM PE=1 SV=1	A0A2R8Y891 (+2)	PFKM	97 kDa	3.3199	0	#DIV/0!
Zinc finger protein 622 OS=Homo sapiens OX=9606 GN=ZNF622 PE=1 SV=1	Q969S3	ZNF622	54 kDa	3.3199	0	#DIV/0!
General transcription factor 3C polypeptide 4 OS=Homo sapiens OX=9606 GN=GTF3C4 PE=1 SV=2	Q9UKN8	GTF3C4	92 kDa	3.3199	0	#DIV/0!
Replication factor C subunit 4 OS=Homo sapiens OX=9606 GN=RFC4 PE=1 SV=2	P35249	RFC4	40 kDa	3.3199	0	#DIV/0!
Mitogen-activated protein kinase kinase kinase 4 OS=Homo sapiens OX=9606 GN=MAP3K4 PE=1 SV=1	F5H538 (+3)	MAP3K4	181 kDa	3.3199	0	#DIV/0!
40S ribosomal protein S18, putative OS=Entamoeba histolytica OX=5759 GN=EHI_009680 PE=3 SV=1	C4LZ42 (+1)	EHI_009680	18 kDa	3.3199	0	#DIV/0!
Rho GTPase-activating protein 17 OS=Homo sapiens OX=9606 GN=ARHGAP17 PE=1 SV=1	Q68EM7 (+3)	ARHGAP17	95 kDa	3.3199	0	#DIV/0!
40S ribosomal protein S25 OS=Entamoeba histolytica OX=5759 GN=EHI_074800 PE=3 SV=1	C4M9F4	EHI_074800	15 kDa	3.3199	0	#DIV/0!
Exosome complex component RRP42 OS=Homo sapiens OX=9606 GN=EXOSC7 PE=1 SV=3	Q15024	EXOSC7	32 kDa	3.3199	0	#DIV/0!
60S ribosomal protein L6, putative OS=Entamoeba histolytica OX=5759 GN=EHI_045300 PE=2 SV=1	C4LTE3 (+1)	EHI_045300	23 kDa	3.3199	0	#DIV/0!
Polypyrimidine tract-binding protein 3 OS=Homo sapiens OX=9606 GN=PTBP3 PE=1 SV=2	O95758 (+5)	PTBP3	60 kDa	3.3199	0	#DIV/0!
Titin OS=Homo sapiens OX=9606 GN=TTN PE=1 SV=1	A0A0A0MTS7 (+1)	TTN	3994 kDa	3.3199	0	#DIV/0!
60S ribosomal protein L2/L8, putative OS=Entamoeba histolytica OX=5759 GN=EHI_127200 PE=2 SV=1	C4LWZ3	EHI_127200	28 kDa	3.3199	0	#DIV/0!
Cyclin-dependent kinase 11A OS=Homo sapiens OX=9606 GN=CDK11A PE=1 SV=1	Q5QPR3 (+7)	CDK11A	91 kDa	3.3199	0	#DIV/0!
Probable E3 ubiquitin-protein ligase makorin-2 OS=Homo sapiens OX=9606 GN=MKRN2 PE=4 SV=1	A0A7I2V5D2 (+4)	MKRN2	48 kDa	3.3199	0	#DIV/0!
E3 ISG15--protein ligase HERC5 OS=Homo sapiens OX=9606 GN=HERC5 PE=1 SV=2	Q9UII4	HERC5	117 kDa	3.3199	0	#DIV/0!
Isoform 4 of U4/U6 small nuclear ribonucleoprotein Prp31 OS=Homo sapiens OX=9606 GN=PRPF31	Q8WWY3-4	PRPF31	55 kDa	3.3199	0	#DIV/0!
DNA helicase OS=Homo sapiens OX=9606 GN=CHD4 PE=1 SV=1	A0A0C4DGG9 (+14)	CHD4	220 kDa	3.3199	0	#DIV/0!
RhoGAP domain containing protein OS=Entamoeba histolytica OX=5759 GN=EHI_049570 PE=4 SV=1	C4LUF8	EHI_049570	73 kDa	3.3199	0	#DIV/0!
Cleavage and polyadenylation specificity factor subunit 5 (Fragment) OS=Homo sapiens OX=9606 GN=NUDT21 PE=1 SV=8	H3BND3 (+1)	NUDT21	17 kDa	3.3199	0	#DIV/0!
Melanoma-associated antigen D1 OS=Homo sapiens OX=9606 GN=MAGED1 PE=1 SV=3	Q9Y5V3 (+1)	MAGED1	86 kDa	3.3199	0	#DIV/0!
60S ribosomal protein L34, putative OS=Entamoeba histolytica OX=5759 GN=EHI_167050 PE=3 SV=1	C4LYA7 (+1)	EHI_167050	15 kDa	3.3199	0	#DIV/0!
60S ribosomal protein L27 OS=Entamoeba histolytica OX=5759 GN=EHI_183480 PE=2 SV=1	C4M727	EHI_183480	16 kDa	3.3199	0	#DIV/0!
Exosome complex component RRP43 OS=Homo sapiens OX=9606 GN=EXOSC8 PE=1 SV=1	Q96B26	EXOSC8	30 kDa	3.3199	0	#DIV/0!
Regulator of chromosome condensation (Fragment) OS=Homo sapiens OX=9606 GN=RCC1 PE=1 SV=1	C9JW69 (+2)	RCC1	40 kDa	3.3199	0	#DIV/0!
GATOR complex protein MIOS OS=Homo sapiens OX=9606 GN=MIOS PE=1 SV=2	Q9NXC5	MIOS	99 kDa	3.3199	0	#DIV/0!
Chromosome 20 open reading frame 129 OS=Homo sapiens OX=9606 GN=FAM83D PE=1 SV=1	A0A087WXK8 (+1)	FAM83D	68 kDa	3.3199	0	#DIV/0!
60S ribosomal protein L23, putative OS=Entamoeba histolytica OX=5759 GN=EHI_051710 PE=3 SV=1	C4LVB0	EHI_051710	15 kDa	3.3199	0	#DIV/0!
Peroxiredoxin OS=Entamoeba histolytica OX=5759 GN=EHI_145840 PE=2 SV=1	C4M3Q0 (+5)	EHI_145840	26 kDa	3.3199	0	#DIV/0!
Ribosomal protein L15 OS=Entamoeba histolytica OX=5759 GN=EHI_020300 PE=2 SV=1	C4M7U2	EHI_020300	24 kDa	3.3199	0	#DIV/0!
40S ribosomal protein S7 OS=Entamoeba histolytica OX=5759 GN=EHI_067530 PE=2 SV=1	C4M9F9	EHI_067530	22 kDa	3.3199	0	#DIV/0!
PRP4 pre-mRNA-processing factor 4 homolog (Fragment) OS=Homo sapiens OX=9606 GN=PRPF4B PE=1 SV=1	H0YDJ3 (+1)	PRPF4B	68 kDa	3.3199	0	#DIV/0!
60S ribosomal protein L36, putative OS=Entamoeba histolytica OX=5759 GN=EHI_124330 PE=3 SV=1	C4LZH1	EHI_124330	12 kDa	3.3199	0	#DIV/0!
Leydig cell tumor 10 kDa protein homolog OS=Homo sapiens OX=9606 GN=C19orf53 PE=1 SV=1	Q9UNZ5	C19orf53	11 kDa	3.3199	0	#DIV/0!
Ran GTPase-activating protein 1 OS=Homo sapiens OX=9606 GN=RANGAP1 PE=1 SV=1	P46060	RANGAP1	64 kDa	3.3199	0	#DIV/0!
Pinin OS=Homo sapiens OX=9606 GN=PNN PE=1 SV=5	Q9H307	PNN	82 kDa	3.3199	0	#DIV/0!
CLIP-associating protein 1 OS=Homo sapiens OX=9606 GN=CLASP1 PE=1 SV=2	F8WA11 (+5)	CLASP1	163 kDa	3.3199	0	#DIV/0!
40S ribosomal protein SA OS=Entamoeba histolytica OX=5759 GN=EHI_081410 PE=2 SV=1	C4M5A0	EHI_081410	29 kDa	3.3199	0	#DIV/0!
Hepatoma-derived growth factor-related protein 2 OS=Homo sapiens OX=9606 GN=HDGFL2 PE=1 SV=1	Q7Z4V5 (+1)	HDGFL2	74 kDa	3.3199	0	#DIV/0!
Transcription elongation factor SPT6 OS=Homo sapiens OX=9606 GN=SUPT6H PE=1 SV=2	Q7KZ85	SUPT6H	199 kDa	3.3199	0	#DIV/0!
RNA polymerase-associated protein LEO1 OS=Homo sapiens OX=9606 GN=LEO1 PE=1 SV=1	Q8WVC0 (+1)	LEO1	75 kDa	3.3199	0	#DIV/0!
Procollagen-lysine,2-oxoglutarate 5-dioxygenase 1 OS=Homo sapiens OX=9606 GN=PLOD1 PE=1 SV=2	Q02809 (+1)	PLOD1	84 kDa	2.4899	0	#DIV/0!
Threonine--tRNA ligase 1, cytoplasmic OS=Homo sapiens OX=9606 GN=TARS1 PE=1 SV=3	P26639 (+1)	TARS1	83 kDa	2.4899	0	#DIV/0!
Endoplasmic reticulum protein SC65 OS=Homo sapiens OX=9606 GN=P3H4 PE=1 SV=1	Q92791	P3H4	50 kDa	2.4899	0	#DIV/0!
Isoform 1 of Rho guanine nucleotide exchange factor 7 OS=Homo sapiens OX=9606 GN=ARHGEF7	Q14155-1 (+1)	ARHGEF7	73 kDa	2.4899	0	#DIV/0!
Centrosome-associated protein 350 OS=Homo sapiens OX=9606 GN=CEP350 PE=1 SV=1	Q5VT06	CEP350	351 kDa	2.4899	0	#DIV/0!
Probable serine carboxypeptidase CPVL OS=Homo sapiens OX=9606 GN=CPVL PE=1 SV=2	Q9H3G5	CPVL	54 kDa	2.4899	0	#DIV/0!
Structural maintenance of chromosomes protein 1A OS=Homo sapiens OX=9606 GN=SMC1A PE=1 SV=2	Q14683	SMC1A	143 kDa	2.4899	0	#DIV/0!
60S ribosomal protein L7a OS=Entamoeba histolytica OX=5759 GN=EHI_103310 PE=3 SV=1	C4LVH6	EHI_103310	32 kDa	2.4899	0	#DIV/0!
60S ribosomal protein L18a OS=Entamoeba histolytica OX=5759 GN=EHI_035600 PE=2 SV=1	C4LXZ0	EHI_035600	20 kDa	2.4899	0	#DIV/0!
Protein FRG1 OS=Homo sapiens OX=9606 GN=FRG1 PE=1 SV=1	Q14331	FRG1	29 kDa	2.4899	0	#DIV/0!
Ubiquitin carboxyl-terminal hydrolase 7 OS=Homo sapiens OX=9606 GN=USP7 PE=1 SV=1	A0A669KBL1 (+3)	USP7	132 kDa	2.4899	0	#DIV/0!
OTU domain-containing protein 4 OS=Homo sapiens OX=9606 GN=OTUD4 PE=1 SV=4	Q01804	OTUD4	124 kDa	2.4899	0	#DIV/0!
RNA helicase OS=Homo sapiens OX=9606 GN=DDX46 PE=1 SV=1	A0A0C4DG89 (+1)	DDX46	117 kDa	2.4899	0	#DIV/0!
Eukaryotic translation elongation factor 1 epsilon-1 OS=Homo sapiens OX=9606 GN=EEF1E1 PE=1 SV=1	O43324	EEF1E1	20 kDa	2.4899	0	#DIV/0!
Cancer-related nucleoside-triphosphatase OS=Homo sapiens OX=9606 GN=NTPCR PE=1 SV=1	Q5TDF0 (+1)	NTPCR	25 kDa	2.4899	0	#DIV/0!
High mobility group protein B1 OS=Homo sapiens OX=9606 GN=HMGB1 PE=1 SV=3	P09429 (+1)	HMGB1	25 kDa	2.4899	0	#DIV/0!
Signal recognition particle 9 kDa protein OS=Homo sapiens OX=9606 GN=SRP9 PE=1 SV=2	P49458	SRP9	10 kDa	2.4899	0	#DIV/0!
Isoleucine--tRNA ligase, mitochondrial OS=Homo sapiens OX=9606 GN=IARS2 PE=1 SV=2	Q9NSE4	IARS2	114 kDa	2.4899	0	#DIV/0!
Malignant T-cell-amplified sequence 1 OS=Homo sapiens OX=9606 GN=MCTS1 PE=1 SV=1	Q9ULC4 (+1)	MCTS1	21 kDa	2.4899	0	#DIV/0!
Mitochondrial carrier homolog 2 OS=Homo sapiens OX=9606 GN=MTCH2 PE=1 SV=1	Q9Y6C9	MTCH2	33 kDa	2.4899	0	#DIV/0!
Coiled-coil domain-containing protein 6 OS=Homo sapiens OX=9606 GN=CCDC6 PE=1 SV=2	Q16204	CCDC6	53 kDa	2.4899	0	#DIV/0!
Condensin complex subunit 1 OS=Homo sapiens OX=9606 GN=NCAPD2 PE=1 SV=3	Q15021	NCAPD2	157 kDa	2.4899	0	#DIV/0!
40S ribosomal protein S26 OS=Entamoeba histolytica OX=5759 GN=EHI_039010 PE=3 SV=1	C4LZS2 (+1)	EHI_039010	16 kDa	2.4899	0	#DIV/0!
Cyclic GMP-AMP synthase OS=Homo sapiens OX=9606 GN=CGAS PE=1 SV=2	Q8N884 (+1)	CGAS	59 kDa	2.4899	0	#DIV/0!
Fibrillarin, putative OS=Entamoeba histolytica OX=5759 GN=EHI_118840 PE=3 SV=1	C4LYN2	EHI_118840	32 kDa	2.4899	0	#DIV/0!
Alpha-globin transcription factor CP2 (Fragment) OS=Homo sapiens OX=9606 GN=TFCP2 PE=1 SV=1	F8VWL0 (+2)	TFCP2	44 kDa	2.4899	0	#DIV/0!
LIM and SH3 domain protein 1 (Fragment) OS=Homo sapiens OX=9606 GN=LASP1 PE=1 SV=1	C9J9W2 (+2)	LASP1	19 kDa	2.4899	0	#DIV/0!
60S ribosomal protein L18, putative OS=Entamoeba histolytica OX=5759 GN=EHI_079190 PE=2 SV=1	C4LXC8	EHI_079190	19 kDa	2.4899	0	#DIV/0!
Replication factor C subunit 3 OS=Homo sapiens OX=9606 GN=RFC3 PE=1 SV=2	P40938 (+1)	RFC3	41 kDa	2.4899	0	#DIV/0!
Medium-chain specific acyl-CoA dehydrogenase, mitochondrial OS=Homo sapiens OX=9606 GN=ACADM PE=1 SV=1	B7Z9I1 (+3)	ACADM	42 kDa	2.4899	0	#DIV/0!
Anaphase-promoting complex subunit 7 OS=Homo sapiens OX=9606 GN=ANAPC7 PE=1 SV=4	Q9UJX3 (+1)	ANAPC7	67 kDa	2.4899	0	#DIV/0!
Kelch domain-containing protein 4 OS=Homo sapiens OX=9606 GN=KLHDC4 PE=1 SV=1	Q8TBB5 (+1)	KLHDC4	58 kDa	2.4899	0	#DIV/0!
CCR4-NOT transcription complex subunit 7 OS=Homo sapiens OX=9606 GN=CNOT7 PE=1 SV=3	Q9UIV1 (+1)	CNOT7	33 kDa	2.4899	0	#DIV/0!
RNA-binding motif protein 42 OS=Homo sapiens OX=9606 GN=RBM42 PE=1 SV=1	K7EP90 (+4)	RBM42	48 kDa	2.4899	0	#DIV/0!
Calcyclin-binding protein OS=Homo sapiens OX=9606 GN=CACYBP PE=1 SV=2	Q9HB71	CACYBP	26 kDa	2.4899	0	#DIV/0!
Early endosome antigen 1 OS=Homo sapiens OX=9606 GN=EEA1 PE=1 SV=2	Q15075	EEA1	162 kDa	2.4899	0	#DIV/0!
60S ribosomal protein L37a, putative OS=Entamoeba histolytica OX=5759 GN=EHI_008650 PE=3 SV=1	A0A175JXH6 (+1)	EHI_008650	10 kDa	2.4899	0	#DIV/0!
CCR4-NOT transcription complex subunit 8 OS=Homo sapiens OX=9606 GN=CNOT8 PE=1 SV=1	Q9UFF9 (+1)	CNOT8	34 kDa	2.4899	0	#DIV/0!
Unconventional myosin-Ic OS=Homo sapiens OX=9606 GN=MYO1C PE=1 SV=1	F5H6E2 (+3)	MYO1C	119 kDa	2.4899	0	#DIV/0!
40S ribosomal protein S7 OS=Entamoeba histolytica OX=5759 GN=EHI_140540 PE=2 SV=1	B1N3K9	EHI_140540	22 kDa	2.4899	0	#DIV/0!
Cleavage and polyadenylation-specificity factor subunit 7 (Fragment) OS=Homo sapiens OX=9606 GN=CPSF7 PE=1 SV=1	F5H047 (+5)	CPSF7	32 kDa	2.4899	0	#DIV/0!
RNA binding motif protein 7, isoform CRA_c OS=Homo sapiens OX=9606 GN=RBM7 PE=1 SV=1	J3KPD3 (+1)	RBM7	31 kDa	2.4899	0	#DIV/0!
CCR4-NOT transcription complex subunit 11 OS=Homo sapiens OX=9606 GN=CNOT11 PE=1 SV=1	Q9UKZ1	CNOT11	55 kDa	2.4899	0	#DIV/0!
Histone deacetylase complex subunit SAP18 (Fragment) OS=Homo sapiens OX=9606 GN=SAP18 PE=1 SV=2	H7BZW6 (+2)	SAP18	16 kDa	2.4899	0	#DIV/0!
Torsin-1A-interacting protein 1 OS=Homo sapiens OX=9606 GN=TOR1AIP1 PE=1 SV=2	Q5JTV8	TOR1AIP1	66 kDa	2.4899	0	#DIV/0!
40S ribosomal protein S19, putative OS=Entamoeba histolytica OX=5759 GN=EHI_198740 PE=3 SV=1	C4LWS0 (+1)	EHI_198740	18 kDa	2.4899	0	#DIV/0!
Nucleosome assembly protein, putative OS=Entamoeba histolytica OX=5759 GN=EHI_120340 PE=3 SV=1	C4M8H9	EHI_120340	31 kDa	2.4899	0	#DIV/0!
TRPM8 channel-associated factor 1 OS=Homo sapiens OX=9606 GN=TCAF1 PE=1 SV=3	Q9Y4C2 (+1)	TCAF1	102 kDa	2.4899	0	#DIV/0!
RNA-binding motif, single-stranded-interacting protein 1 OS=Homo sapiens OX=9606 GN=RBMS1 PE=1 SV=1	E7ETU5 (+3)	RBMS1	40 kDa	2.4899	0	#DIV/0!
40S ribosomal protein S15a, putative OS=Entamoeba histolytica OX=5759 GN=EHI_073600 PE=3 SV=1	C4LXM0	EHI_073600	15 kDa	2.4899	0	#DIV/0!
40S ribosomal protein S17, putative OS=Entamoeba histolytica OX=5759 GN=EHI_135060 PE=3 SV=1	C4M0Z2 (+1)	EHI_135060	14 kDa	2.4899	0	#DIV/0!
Exosome complex component CSL4 OS=Homo sapiens OX=9606 GN=EXOSC1 PE=1 SV=1	B1AMU3 (+2)	EXOSC1	19 kDa	2.4899	0	#DIV/0!
Isoform 2 of Mitochondrial import inner membrane translocase subunit TIM50 OS=Homo sapiens OX=9606 GN=TIMM50	Q3ZCQ8-2	TIMM50	50 kDa	2.4899	0	#DIV/0!
Peptidyl-prolyl cis-trans isomerase-like 1 OS=Homo sapiens OX=9606 GN=PPIL1 PE=1 SV=1	Q9Y3C6	PPIL1	18 kDa	2.4899	0	#DIV/0!
S phase cyclin A-associated protein in the endoplasmic reticulum OS=Homo sapiens OX=9606 GN=SCAPER PE=1 SV=2	Q9BY12	SCAPER	158 kDa	2.4899	0	#DIV/0!
60S ribosomal protein L17, putative OS=Entamoeba histolytica OX=5759 GN=EHI_054740 PE=3 SV=1	C4M2J3	EHI_054740	20 kDa	2.4899	0	#DIV/0!
ADP-ribosylation factor GTPase-activating protein 1 OS=Homo sapiens OX=9606 GN=ARFGAP1 PE=1 SV=1	F8VWH9 (+4)	ARFGAP1	37 kDa	2.4899	0	#DIV/0!
Unconventional myosin-Ie OS=Homo sapiens OX=9606 GN=MYO1E PE=1 SV=2	Q12965	MYO1E	127 kDa	2.4899	0	#DIV/0!
E3 ubiquitin-protein ligase RAD18 OS=Homo sapiens OX=9606 GN=RAD18 PE=1 SV=2	Q9NS91	RAD18	56 kDa	2.4899	0	#DIV/0!
Isoform 10 of CCR4-NOT transcription complex subunit 4 OS=Homo sapiens OX=9606 GN=CNOT4	O95628-10 (+3)	CNOT4	78 kDa	2.4899	0	#DIV/0!
PIWI, putative OS=Entamoeba histolytica OX=5759 GN=EHI_125650 PE=3 SV=1	C4LVV2	EHI_125650	110 kDa	1.6599	0	#DIV/0!
Immunoglobulin kappa variable 1-17 OS=Homo sapiens OX=9606 GN=IGKV1-17 PE=1 SV=2	P01599	IGKV1-17	13 kDa	1.6599	0	#DIV/0!
Protein S100-A9 OS=Homo sapiens OX=9606 GN=S100A9 PE=1 SV=1	P06702	S100A9	13 kDa	1.6599	0	#DIV/0!
Glutaredoxin-3 OS=Homo sapiens OX=9606 GN=GLRX3 PE=1 SV=2	O76003	GLRX3	37 kDa	1.6599	0	#DIV/0!
Endoplasmic reticulum transmembrane helix translocase OS=Homo sapiens OX=9606 GN=ATP13A1 PE=1 SV=2	Q9HD20 (+1)	ATP13A1	133 kDa	1.6599	0	#DIV/0!
Ubiquitin carboxyl-terminal hydrolase OS=Homo sapiens OX=9606 GN=USP14 PE=1 SV=2	A6NJA2 (+3)	USP14	51 kDa	1.6599	0	#DIV/0!
Calcium/calmodulin-dependent protein kinase OS=Homo sapiens OX=9606 GN=CAMK2D PE=1 SV=1	D6R938 (+8)	CAMK2D	56 kDa	1.6599	0	#DIV/0!
General transcription factor II-I OS=Homo sapiens OX=9606 GN=GTF2I PE=1 SV=1	A0A494C1K3 (+4)	GTF2I	131 kDa	1.6599	0	#DIV/0!
E3 ubiquitin-protein ligase RNF213 OS=Homo sapiens OX=9606 GN=RNF213 PE=1 SV=1	A0A0A0MTC1 (+3)	RNF213	596 kDa	1.6599	0	#DIV/0!
Transmembrane emp24 domain-containing protein 9 OS=Homo sapiens OX=9606 GN=TMED9 PE=1 SV=2	Q9BVK6	TMED9	27 kDa	1.6599	0	#DIV/0!
GMP synthase [glutamine-hydrolyzing] OS=Homo sapiens OX=9606 GN=GMPS PE=1 SV=1	P49915 (+1)	GMPS	77 kDa	1.6599	0	#DIV/0!
Profilin-1 OS=Homo sapiens OX=9606 GN=PFN1 PE=1 SV=2	P07737	PFN1	15 kDa	1.6599	0	#DIV/0!
Serine/threonine-protein phosphatase 4 regulatory subunit 3A OS=Homo sapiens OX=9606 GN=PPP4R3A PE=1 SV=1	Q6IN85 (+1)	PPP4R3A	95 kDa	1.6599	0	#DIV/0!
ARF GTPase-activating protein GIT2 OS=Homo sapiens OX=9606 GN=GIT2 PE=1 SV=2	Q14161	GIT2	85 kDa	1.6599	0	#DIV/0!
Importin-7 OS=Homo sapiens OX=9606 GN=IPO7 PE=1 SV=1	O95373	IPO7	120 kDa	1.6599	0	#DIV/0!
Translation initiation factor eIF-2B subunit beta OS=Homo sapiens OX=9606 GN=EIF2B2 PE=1 SV=3	P49770	EIF2B2	39 kDa	1.6599	0	#DIV/0!
Arginine and glutamate-rich protein 1 OS=Homo sapiens OX=9606 GN=ARGLU1 PE=1 SV=1	Q9NWB6 (+1)	ARGLU1	33 kDa	1.6599	0	#DIV/0!
Bifunctional purine biosynthesis protein ATIC OS=Homo sapiens OX=9606 GN=ATIC PE=1 SV=3	P31939	ATIC	65 kDa	1.6599	0	#DIV/0!
Acyl-peptide hydrolase OS=Homo sapiens OX=9606 GN=APEH PE=1 SV=1	C9JIF9 (+1)	APEH	82 kDa	1.6599	0	#DIV/0!
Cytoplasmic aconitate hydratase OS=Homo sapiens OX=9606 GN=ACO1 PE=1 SV=3	P21399	ACO1	98 kDa	1.6599	0	#DIV/0!
26S proteasome non-ATPase regulatory subunit 8 OS=Homo sapiens OX=9606 GN=PSMD8 PE=1 SV=2	P48556 (+1)	PSMD8	40 kDa	1.6599	0	#DIV/0!
Ubiquitin-conjugating enzyme E2 variant 1 OS=Homo sapiens OX=9606 GN=UBE2V1 PE=1 SV=2	Q13404	UBE2V1	16 kDa	1.6599	0	#DIV/0!
AP-3 complex subunit mu-1 OS=Homo sapiens OX=9606 GN=AP3M1 PE=1 SV=1	Q9Y2T2	AP3M1	47 kDa	1.6599	0	#DIV/0!
Protein BUD31 homolog OS=Homo sapiens OX=9606 GN=BUD31 PE=1 SV=2	P41223 (+1)	BUD31	17 kDa	1.6599	0	#DIV/0!
Nuclear protein localization protein 4 homolog OS=Homo sapiens OX=9606 GN=NPLOC4 PE=1 SV=3	Q8TAT6 (+1)	NPLOC4	68 kDa	1.6599	0	#DIV/0!
WW domain-binding protein 11 OS=Homo sapiens OX=9606 GN=WBP11 PE=1 SV=1	Q9Y2W2	WBP11	70 kDa	1.6599	0	#DIV/0!
Nucleolar GTP-binding protein 2 OS=Homo sapiens OX=9606 GN=GNL2 PE=1 SV=1	Q13823	GNL2	84 kDa	1.6599	0	#DIV/0!
60S ribosomal protein L26, putative OS=Entamoeba histolytica OX=5759 GN=EHI_111570 PE=2 SV=1	C4M569	EHI_111570	24 kDa	1.6599	0	#DIV/0!
S-phase kinase-associated protein 1 OS=Homo sapiens OX=9606 GN=SKP1 PE=1 SV=1	E5RJR5 (+1)	SKP1	19 kDa	1.6599	0	#DIV/0!
Protein LSM12 homolog OS=Homo sapiens OX=9606 GN=LSM12 PE=1 SV=2	Q3MHD2 (+1)	LSM12	22 kDa	1.6599	0	#DIV/0!
Nucleolar protein 16 OS=Homo sapiens OX=9606 GN=NOP16 PE=1 SV=1	A0A087X2G6 (+5)	NOP16	27 kDa	1.6599	0	#DIV/0!
Protein HEXIM1 OS=Homo sapiens OX=9606 GN=HEXIM1 PE=1 SV=1	O94992	HEXIM1	41 kDa	1.6599	0	#DIV/0!
SUMO-conjugating enzyme UBC9 OS=Homo sapiens OX=9606 GN=UBE2I PE=1 SV=1	B0QYN7 (+2)	UBE2I	20 kDa	1.6599	0	#DIV/0!
NADH dehydrogenase [ubiquinone] 1 subunit C2 OS=Homo sapiens OX=9606 GN=NDUFC2 PE=1 SV=1	O95298 (+1)	NDUFC2	14 kDa	1.6599	0	#DIV/0!
MAP7 domain-containing protein 2 OS=Homo sapiens OX=9606 GN=MAP7D2 PE=1 SV=2	Q96T17 (+1)	MAP7D2	82 kDa	1.6599	0	#DIV/0!
Inorganic pyrophosphatase 2, mitochondrial OS=Homo sapiens OX=9606 GN=PPA2 PE=1 SV=2	Q9H2U2 (+1)	PPA2	38 kDa	1.6599	0	#DIV/0!
Splicing factor 3A subunit 3 OS=Homo sapiens OX=9606 GN=SF3A3 PE=1 SV=1	Q12874	SF3A3	59 kDa	1.6599	0	#DIV/0!
RNA-binding protein 27 OS=Homo sapiens OX=9606 GN=RBM27 PE=1 SV=2	Q9P2N5	RBM27	119 kDa	1.6599	0	#DIV/0!
Mitochondrial proton/calcium exchanger protein OS=Homo sapiens OX=9606 GN=LETM1 PE=1 SV=1	O95202	LETM1	83 kDa	1.6599	0	#DIV/0!
Cathepsin B OS=Homo sapiens OX=9606 GN=CTSB PE=4 SV=1	A0A7I2V440 (+3)	CTSB	40 kDa	1.6599	0	#DIV/0!
Apoptotic chromatin condensation inducer in the nucleus OS=Homo sapiens OX=9606 GN=ACIN1 PE=1 SV=2	E7EQT4 (+3)	ACIN1	147 kDa	1.6599	0	#DIV/0!
DNA polymerase OS=Homo sapiens OX=9606 GN=POLD1 PE=1 SV=1	A0A087WYJ2 (+2)	POLD1	121 kDa	1.6599	0	#DIV/0!
DnaJ homolog subfamily B member 11 OS=Homo sapiens OX=9606 GN=DNAJB11 PE=1 SV=1	Q9UBS4	DNAJB11	41 kDa	1.6599	0	#DIV/0!
DnaJ homolog subfamily B member 6 OS=Homo sapiens OX=9606 GN=DNAJB6 PE=1 SV=1	E9PH18 (+1)	DNAJB6	24 kDa	1.6599	0	#DIV/0!
HCG1985580, isoform CRA_c OS=Homo sapiens OX=9606 GN=PDCD6 PE=1 SV=1	A0A024QZ42 (+1)	PDCD6	14 kDa	1.6599	0	#DIV/0!
Proteasomal ubiquitin receptor ADRM1 OS=Homo sapiens OX=9606 GN=ADRM1 PE=1 SV=2	Q16186	ADRM1	42 kDa	1.6599	0	#DIV/0!
Transcriptional repressor CTCF OS=Homo sapiens OX=9606 GN=CTCF PE=1 SV=1	A0A2R8Y595 (+3)	CTCF	73 kDa	1.6599	0	#DIV/0!
Acidic repeat-containing protein OS=Homo sapiens OX=9606 GN=GCNA PE=1 SV=1	Q96QF7	GCNA	76 kDa	1.6599	0	#DIV/0!
Low molecular weight phosphotyrosine protein phosphatase OS=Homo sapiens OX=9606 GN=ACP1 PE=1 SV=3	P24666	ACP1	18 kDa	1.6599	0	#DIV/0!
Isoform 3 of Tudor domain-containing protein 3 OS=Homo sapiens OX=9606 GN=TDRD3	Q9H7E2-3	TDRD3	83 kDa	1.6599	0	#DIV/0!
Protein phosphatase 1G OS=Homo sapiens OX=9606 GN=PPM1G PE=1 SV=1	O15355	PPM1G	59 kDa	1.6599	0	#DIV/0!
E3 ubiquitin-protein ligase UBR5 OS=Homo sapiens OX=9606 GN=UBR5 PE=1 SV=2	O95071 (+1)	UBR5	309 kDa	1.6599	0	#DIV/0!
N-terminal kinase-like protein OS=Homo sapiens OX=9606 GN=SCYL1 PE=1 SV=1	E9PK59 (+6)	SCYL1	86 kDa	1.6599	0	#DIV/0!
WD40 repeat-containing protein SMU1 OS=Homo sapiens OX=9606 GN=SMU1 PE=1 SV=2	Q2TAY7	SMU1	58 kDa	1.6599	0	#DIV/0!
Ran-specific GTPase-activating protein OS=Homo sapiens OX=9606 GN=RANBP1 PE=1 SV=1	F6WQW2 (+2)	RANBP1	32 kDa	1.6599	0	#DIV/0!
Negative elongation factor B OS=Homo sapiens OX=9606 GN=NELFB PE=1 SV=1	A0A5H1ZRP4 (+1)	NELFB	70 kDa	1.6599	0	#DIV/0!
High mobility group nucleosome-binding domain-containing protein 4 OS=Homo sapiens OX=9606 GN=HMGN4 PE=1 SV=3	O00479	HMGN4	10 kDa	1.6599	0	#DIV/0!
Protein CASC3 OS=Homo sapiens OX=9606 GN=CASC3 PE=1 SV=2	O15234	CASC3	76 kDa	1.6599	0	#DIV/0!
Hydroxyacyl-coenzyme A dehydrogenase, mitochondrial OS=Homo sapiens OX=9606 GN=HADH PE=1 SV=2	E9PF18 (+1)	HADH	42 kDa	1.6599	0	#DIV/0!
60S ribosomal protein L44, putative OS=Entamoeba histolytica OX=5759 GN=EHI_092120 PE=3 SV=1	C4LS99	EHI_092120	12 kDa	1.6599	0	#DIV/0!
GPI transamidase component PIG-T (Fragment) OS=Homo sapiens OX=9606 GN=PIGT PE=1 SV=1	A0A1W2PNP0 (+11)	PIGT	66 kDa	1.6599	0	#DIV/0!
Small ubiquitin-related modifier 1 OS=Homo sapiens OX=9606 GN=SUMO1 PE=1 SV=1	B8ZZN6 (+2)	SUMO1	17 kDa	1.6599	0	#DIV/0!
60S ribosomal protein L32, putative OS=Entamoeba histolytica OX=5759 GN=EHI_044770 PE=3 SV=1	C4LT96	EHI_044770	16 kDa	1.6599	0	#DIV/0!
26S proteasome non-ATPase regulatory subunit 7 OS=Homo sapiens OX=9606 GN=PSMD7 PE=1 SV=2	P51665	PSMD7	37 kDa	1.6599	0	#DIV/0!
Ataxin-10 OS=Homo sapiens OX=9606 GN=ATXN10 PE=1 SV=1	Q9UBB4 (+1)	ATXN10	53 kDa	1.6599	0	#DIV/0!
60S ribosomal protein L35a, putative OS=Entamoeba histolytica OX=5759 GN=EHI_014110 PE=3 SV=1	B1N4V3	EHI_014110	12 kDa	1.6599	0	#DIV/0!
Bifunctional polynucleotide phosphatase/kinase OS=Homo sapiens OX=9606 GN=PNKP PE=1 SV=1	A0A0D9SFL2 (+3)	PNKP	53 kDa	1.6599	0	#DIV/0!
Acidic leucine-rich nuclear phosphoprotein 32 family member B OS=Homo sapiens OX=9606 GN=ANP32B PE=1 SV=1	Q92688 (+1)	ANP32B	29 kDa	1.6599	0	#DIV/0!
DNA dC->dU-editing enzyme APOBEC-3B OS=Homo sapiens OX=9606 GN=APOBEC3B PE=1 SV=1	B0QYD3 (+3)	APOBEC3B	57 kDa	1.6599	0	#DIV/0!
Xaa-Pro dipeptidase (Fragment) OS=Homo sapiens OX=9606 GN=PEPD PE=1 SV=1	A0A494C165 (+4)	PEPD	58 kDa	1.6599	0	#DIV/0!
Tricarboxylate transport protein, mitochondrial OS=Homo sapiens OX=9606 GN=SLC25A1 PE=1 SV=2	P53007	SLC25A1	34 kDa	1.6599	0	#DIV/0!
60S ribosomal protein L11, putative OS=Entamoeba histolytica OX=5759 GN=EHI_124300 PE=3 SV=1	C4LZG9 (+1)	EHI_124300	20 kDa	1.6599	0	#DIV/0!
MKI67 FHA domain-interacting nucleolar phosphoprotein OS=Homo sapiens OX=9606 GN=NIFK PE=1 SV=1	Q9BYG3	NIFK	34 kDa	1.6599	0	#DIV/0!
60S ribosomal protein L12, putative OS=Entamoeba histolytica OX=5759 GN=EHI_030710 PE=2 SV=1	C4M1E1	EHI_030710	18 kDa	1.6599	0	#DIV/0!
RNA-binding protein 25 OS=Homo sapiens OX=9606 GN=RBM25 PE=1 SV=3	P49756	RBM25	100 kDa	1.6599	0	#DIV/0!
Pleiotropic regulator 1 OS=Homo sapiens OX=9606 GN=PLRG1 PE=1 SV=1	O43660 (+1)	PLRG1	57 kDa	1.6599	0	#DIV/0!
Multiple myeloma tumor-associated protein 2 OS=Homo sapiens OX=9606 GN=MMTAG2 PE=1 SV=1	Q9BU76	MMTAG2	29 kDa	1.6599	0	#DIV/0!
U4/U6 small nuclear ribonucleoprotein Prp4 OS=Homo sapiens OX=9606 GN=PRPF4 PE=1 SV=2	O43172 (+1)	PRPF4	58 kDa	1.6599	0	#DIV/0!
Emerin OS=Homo sapiens OX=9606 GN=EMD PE=1 SV=1	P50402	EMD	29 kDa	1.6599	0	#DIV/0!
Claudin-4 OS=Homo sapiens OX=9606 GN=CLDN4 PE=1 SV=1	O14493	CLDN4	22 kDa	1.6599	0	#DIV/0!
Fibrous sheath-interacting protein 2 OS=Homo sapiens OX=9606 GN=FSIP2 PE=2 SV=4	Q5CZC0	FSIP2	781 kDa	1.6599	0	#DIV/0!
Isoform 3 of Methenyltetrahydrofolate synthase domain-containing protein OS=Homo sapiens OX=9606 GN=MTHFSD	Q2M296-3 (+1)	MTHFSD	42 kDa	1.6599	0	#DIV/0!
Protein IWS1 homolog OS=Homo sapiens OX=9606 GN=IWS1 PE=1 SV=2	Q96ST2	IWS1	92 kDa	1.6599	0	#DIV/0!
DnaJ homolog subfamily C member 10 OS=Homo sapiens OX=9606 GN=DNAJC10 PE=1 SV=1	A0A494C1G5 (+3)	DNAJC10	35 kDa	1.6599	0	#DIV/0!
60S acidic ribosomal protein P0 OS=Entamoeba histolytica OX=5759 GN=EHI_090400 PE=2 SV=1	B1N2Z3	EHI_090400	34 kDa	1.6599	0	#DIV/0!
60S ribosomal protein L35, putative OS=Entamoeba histolytica OX=5759 GN=EHI_042720 PE=3 SV=1	C4MB46	EHI_042720	13 kDa	1.6599	0	#DIV/0!
Zinc finger CCCH domain-containing protein 4 (Fragment) OS=Homo sapiens OX=9606 GN=ZC3H4 PE=1 SV=1	M0QY97 (+1)	ZC3H4	96 kDa	1.6599	0	#DIV/0!
Endophilin-A2 OS=Homo sapiens OX=9606 GN=SH3GL1 PE=1 SV=1	Q99961	SH3GL1	41 kDa	1.6599	0	#DIV/0!
Regulation of nuclear pre-mRNA domain-containing protein 1B OS=Homo sapiens OX=9606 GN=RPRD1B PE=1 SV=1	Q9NQG5	RPRD1B	37 kDa	1.6599	0	#DIV/0!
39S ribosomal protein L9, mitochondrial OS=Homo sapiens OX=9606 GN=MRPL9 PE=1 SV=1	Q5SZR1 (+1)	MRPL9	26 kDa	1.6599	0	#DIV/0!
Cytochrome c (Fragment) OS=Homo sapiens OX=9606 GN=CYCS PE=1 SV=1	C9JFR7 (+1)	CYCS	11 kDa	1.6599	0	#DIV/0!
Transmembrane protein 33 (Fragment) OS=Homo sapiens OX=9606 GN=TMEM33 PE=1 SV=1	D6RAA6 (+1)	TMEM33	25 kDa	1.6599	0	#DIV/0!
RNA recognition motif domain containing protein OS=Entamoeba histolytica OX=5759 GN=EHI_026440 PE=4 SV=1	C4M5W4	EHI_026440	29 kDa	1.6599	0	#DIV/0!
Transcription factor BTF3 OS=Homo sapiens OX=9606 GN=BTF3L4 PE=1 SV=1	E9PL10 (+1)	BTF3L4	16 kDa	1.6599	0	#DIV/0!
Switch-associated protein 70 OS=Homo sapiens OX=9606 GN=SWAP70 PE=1 SV=1	Q9UH65	SWAP70	69 kDa	1.6599	0	#DIV/0!
Protein disulfide-isomerase A5 OS=Homo sapiens OX=9606 GN=PDIA5 PE=1 SV=1	Q14554	PDIA5	60 kDa	1.6599	0	#DIV/0!
GTPase Era, mitochondrial (Fragment) OS=Homo sapiens OX=9606 GN=ERAL1 PE=1 SV=1	J3QSB2	ERAL1	30 kDa	1.6599	0	#DIV/0!
Replication initiator 1 OS=Homo sapiens OX=9606 GN=REPIN1 PE=1 SV=1	Q9BWE0 (+1)	REPIN1	64 kDa	1.6599	0	#DIV/0!
Ribonucloprotein OS=Homo sapiens OX=9606 GN=SNU13 PE=1 SV=1	B1AHD1	SNU13	15 kDa	1.6599	0	#DIV/0!
Active regulator of SIRT1 OS=Homo sapiens OX=9606 GN=RPS19BP1 PE=1 SV=1	Q86WX3	RPS19BP1	15 kDa	1.6599	0	#DIV/0!
Multifunctional methyltransferase subunit TRM112-like protein OS=Homo sapiens OX=9606 GN=TRMT112 PE=1 SV=1	F5GX77 (+2)	TRMT112	12 kDa	1.6599	0	#DIV/0!
60S ribosomal protein L30, putative OS=Entamoeba histolytica OX=5759 GN=EHI_065740 PE=3 SV=1	C4LZZ0	EHI_065740	12 kDa	1.6599	0	#DIV/0!
RNA helicase OS=Homo sapiens OX=9606 GN=DDX42 PE=1 SV=1	A0A0A0MSJ0 (+2)	DDX42	78 kDa	1.6599	0	#DIV/0!
Rootletin (Fragment) OS=Homo sapiens OX=9606 GN=CROCC PE=1 SV=2	B1AKD8 (+1)	CROCC	149 kDa	1.6599	0	#DIV/0!
Immunoglobulin lambda-like polypeptide 5 OS=Homo sapiens OX=9606 GN=IGLL5 PE=1 SV=1	A0A0B4J231 (+1)	IGLL5	23 kDa	1.6599	0	#DIV/0!
Carabin OS=Homo sapiens OX=9606 GN=TBC1D10C PE=1 SV=1	Q8IV04	TBC1D10C	50 kDa	1.6599	0	#DIV/0!
Sequestosome-1 OS=Homo sapiens OX=9606 GN=SQSTM1 PE=1 SV=1	E7EMC7 (+3)	SQSTM1	41 kDa	1.6599	0	#DIV/0!
Immunoglobulin heavy constant alpha 1 (Fragment) OS=Homo sapiens OX=9606 GN=IGHA1 PE=1 SV=1	A0A286YEY1 (+1)	IGHA1	43 kDa	1.6599	0	#DIV/0!
Dihydrolipoyllysine-residue acetyltransferase component of pyruvate dehydrogenase complex, mitochondrial OS=Homo sapiens OX=9606 GN=DLAT PE=1 SV=3	P10515	DLAT	69 kDa	1.6599	0	#DIV/0!
39S ribosomal protein L37, mitochondrial OS=Homo sapiens OX=9606 GN=MRPL37 PE=1 SV=2	Q9BZE1 (+1)	MRPL37	48 kDa	1.6599	0	#DIV/0!
DnaJ homolog subfamily C member 8 OS=Homo sapiens OX=9606 GN=DNAJC8 PE=1 SV=2	O75937	DNAJC8	30 kDa	1.6599	0	#DIV/0!
DNA ligase 3 OS=Homo sapiens OX=9606 GN=LIG3 PE=1 SV=2	P49916 (+3)	LIG3	113 kDa	1.6599	0	#DIV/0!
Transcription elongation regulator 1 OS=Homo sapiens OX=9606 GN=TCERG1 PE=1 SV=2	O14776 (+1)	TCERG1	124 kDa	1.6599	0	#DIV/0!
Coiled-coil domain-containing protein 90B, mitochondrial (Fragment) OS=Homo sapiens OX=9606 GN=CCDC90B PE=1 SV=1	H0YF06	CCDC90B	15 kDa	1.6599	0	#DIV/0!
Band 4.1-like protein 4B OS=Homo sapiens OX=9606 GN=EPB41L4B PE=2 SV=2	Q9H329	EPB41L4B	100 kDa	1.6599	0	#DIV/0!
Adenylyl cyclase-associated protein OS=Entamoeba histolytica OX=5759 GN=EHI_136150 PE=3 SV=1	C4M295	EHI_136150	53 kDa	1.6599	0	#DIV/0!
Isoform Alpha of Striatin-3 OS=Homo sapiens OX=9606 GN=STRN3	Q13033-2	STRN3	78 kDa	1.6599	0	#DIV/0!
Metaxin-2 OS=Homo sapiens OX=9606 GN=MTX2 PE=1 SV=1	C9JNK6 (+2)	MTX2	24 kDa	1.6599	0	#DIV/0!
U3 small nucleolar RNA-interacting protein 2 OS=Homo sapiens OX=9606 GN=RRP9 PE=1 SV=1	O43818	RRP9	52 kDa	1.6599	0	#DIV/0!
DNA-directed DNA polymerase OS=Entamoeba histolytica OX=5759 GN=EHI_132860 PE=3 SV=1	C4MAU5	EHI_132860	129 kDa	1.6599	0	#DIV/0!
Translationally-controlled tumor protein OS=Homo sapiens OX=9606 GN=TPT1 PE=1 SV=1	A0A0B4J2C3 (+5)	TPT1	23 kDa	1.6599	0	#DIV/0!
Zinc finger CCCH domain-containing protein 11A (Fragment) OS=Homo sapiens OX=9606 GN=ZC3H11A PE=1 SV=1	E9PBY7 (+2)	ZC3H11A	57 kDa	1.6599	0	#DIV/0!
ATP synthase subunit d, mitochondrial OS=Homo sapiens OX=9606 GN=ATP5PD PE=1 SV=3	O75947	ATP5PD	18 kDa	1.6599	0	#DIV/0!
Testis-specific Y-encoded-like protein 1 OS=Homo sapiens OX=9606 GN=TSPYL1 PE=1 SV=3	Q9H0U9	TSPYL1	49 kDa	1.6599	0	#DIV/0!
Calpain-10 OS=Homo sapiens OX=9606 GN=CAPN10 PE=1 SV=1	B7WPF5 (+1)	CAPN10	73 kDa	1.6599	0	#DIV/0!
Epithelial splicing regulatory protein 2 OS=Homo sapiens OX=9606 GN=ESRP2 PE=1 SV=1	Q9H6T0 (+1)	ESRP2	78 kDa	1.6599	0	#DIV/0!
39S ribosomal protein L38, mitochondrial OS=Homo sapiens OX=9606 GN=MRPL38 PE=1 SV=2	Q96DV4	MRPL38	45 kDa	1.6599	0	#DIV/0!
THO complex subunit 6 homolog OS=Homo sapiens OX=9606 GN=THOC6 PE=1 SV=1	Q86W42 (+2)	THOC6	38 kDa	1.6599	0	#DIV/0!
Lamin-B1 OS=Homo sapiens OX=9606 GN=LMNB1 PE=1 SV=2	P20700	LMNB1	66 kDa	1.6599	0	#DIV/0!
Extracellular glycoprotein lacritin OS=Homo sapiens OX=9606 GN=LACRT PE=1 SV=1	Q9GZZ8	LACRT	14 kDa	1.6599	0	#DIV/0!
Nitric oxide synthase-interacting protein OS=Homo sapiens OX=9606 GN=NOSIP PE=1 SV=1	A0A075B6F9 (+1)	NOSIP	33 kDa	1.6599	0	#DIV/0!
Glycogen phosphorylase, brain form OS=Homo sapiens OX=9606 GN=PYGB PE=1 SV=5	P11216	PYGB	97 kDa	0.82997	0	#DIV/0!
Cullin-associated NEDD8-dissociated protein 1 OS=Homo sapiens OX=9606 GN=CAND1 PE=1 SV=2	Q86VP6 (+1)	CAND1	136 kDa	0.82997	0	#DIV/0!
Calumenin OS=Homo sapiens OX=9606 GN=CALU PE=1 SV=2	O43852 (+1)	CALU	37 kDa	0.82997	0	#DIV/0!
Tyrosine--tRNA ligase, cytoplasmic OS=Homo sapiens OX=9606 GN=YARS1 PE=1 SV=4	P54577	YARS1	59 kDa	0.82997	0	#DIV/0!
N-alpha-acetyltransferase 25, NatB auxiliary subunit OS=Homo sapiens OX=9606 GN=NAA25 PE=1 SV=1	Q14CX7 (+1)	NAA25	112 kDa	0.82997	0	#DIV/0!
Hsp90 co-chaperone Cdc37 OS=Homo sapiens OX=9606 GN=CDC37 PE=1 SV=1	Q16543	CDC37	44 kDa	0.82997	0	#DIV/0!
Signal transducer and activator of transcription OS=Homo sapiens OX=9606 GN=STAT1 PE=1 SV=1	A0A669KB53 (+4)	STAT1	91 kDa	0.82997	0	#DIV/0!
Ribonuclease 3 OS=Homo sapiens OX=9606 GN=DROSHA PE=1 SV=2	Q9NRR4 (+3)	DROSHA	159 kDa	0.82997	0	#DIV/0!
PDZ and LIM domain protein 1 OS=Homo sapiens OX=9606 GN=PDLIM1 PE=1 SV=4	O00151	PDLIM1	36 kDa	0.82997	0	#DIV/0!
Serine/threonine-protein phosphatase 6 catalytic subunit OS=Homo sapiens OX=9606 GN=PPP6C PE=1 SV=1	O00743 (+2)	PPP6C	35 kDa	0.82997	0	#DIV/0!
1-phosphatidylinositol 4,5-bisphosphate phosphodiesterase beta-3 OS=Homo sapiens OX=9606 GN=PLCB3 PE=1 SV=2	Q01970 (+1)	PLCB3	139 kDa	0.82997	0	#DIV/0!
Signal recognition particle 19 kDa protein OS=Homo sapiens OX=9606 GN=SRP19 PE=1 SV=1	A0A087WYR0 (+1)	SRP19	14 kDa	0.82997	0	#DIV/0!
Serine/threonine-protein phosphatase 6 regulatory subunit 3 OS=Homo sapiens OX=9606 GN=PPP6R3 PE=1 SV=1	E9PKF6 (+7)	PPP6R3	94 kDa	0.82997	0	#DIV/0!
Lariat debranching enzyme OS=Homo sapiens OX=9606 GN=DBR1 PE=1 SV=2	Q9UK59	DBR1	62 kDa	0.82997	0	#DIV/0!
ER membrane protein complex subunit 3 OS=Homo sapiens OX=9606 GN=EMC3 PE=1 SV=3	Q9P0I2 (+1)	EMC3	30 kDa	0.82997	0	#DIV/0!
Isoform 7 of Polyglutamine-binding protein 1 OS=Homo sapiens OX=9606 GN=PQBP1	O60828-7	PQBP1	14 kDa	0.82997	0	#DIV/0!
G2/mitotic-specific cyclin-B1 (Fragment) OS=Homo sapiens OX=9606 GN=CCNB1 PE=1 SV=1	E9PC90 (+1)	CCNB1	45 kDa	0.82997	0	#DIV/0!
Transcription elongation factor A protein 1 OS=Homo sapiens OX=9606 GN=TCEA1 PE=1 SV=1	A0A1W2PPZ5 (+1)	TCEA1	34 kDa	0.82997	0	#DIV/0!
Replication protein A 32 kDa subunit OS=Homo sapiens OX=9606 GN=RPA2 PE=1 SV=1	P15927 (+2)	RPA2	29 kDa	0.82997	0	#DIV/0!
Trinucleotide repeat-containing gene 6B protein OS=Homo sapiens OX=9606 GN=TNRC6B PE=1 SV=4	Q9UPQ9 (+1)	TNRC6B	194 kDa	0.82997	0	#DIV/0!
L-aminoadipate-semialdehyde dehydrogenase-phosphopantetheinyl transferase OS=Homo sapiens OX=9606 GN=AASDHPPT PE=1 SV=2	Q9NRN7	AASDHPPT	36 kDa	0.82997	0	#DIV/0!
2-deoxy-D-ribose 5-phosphate aldolase OS=Homo sapiens OX=9606 GN=DERA PE=1 SV=1	E9PPM8 (+1)	DERA	31 kDa	0.82997	0	#DIV/0!
60S ribosomal protein L39, putative OS=Entamoeba histolytica OX=5759 GN=EHI_044830 PE=3 SV=1	C4LTA2	EHI_044830	6 kDa	0.82997	0	#DIV/0!
Growth factor receptor-bound protein 7 OS=Homo sapiens OX=9606 GN=GRB7 PE=1 SV=2	Q14451 (+3)	GRB7	60 kDa	0.82997	0	#DIV/0!
Nesprin-1 OS=Homo sapiens OX=9606 GN=SYNE1 PE=1 SV=1	A0A0C4DG40 (+2)	SYNE1	1005 kDa	0.82997	0	#DIV/0!
60S ribosomal protein L14, putative OS=Entamoeba histolytica OX=5759 GN=EHI_050130 PE=3 SV=1	C4LTQ0 (+2)	EHI_050130	13 kDa	0.82997	0	#DIV/0!
ATPase family AAA domain-containing protein 2 OS=Homo sapiens OX=9606 GN=ATAD2 PE=1 SV=1	Q6PL18	ATAD2	159 kDa	0.82997	0	#DIV/0!
Peroxiredoxin-like 2A OS=Homo sapiens OX=9606 GN=PRXL2A PE=1 SV=3	Q9BRX8 (+1)	PRXL2A	26 kDa	0.82997	0	#DIV/0!
Mucin-16 OS=Homo sapiens OX=9606 GN=MUC16 PE=1 SV=3	Q8WXI7	MUC16	1519 kDa	0.82997	0	#DIV/0!
Isoform 2 of Nebulin OS=Homo sapiens OX=9606 GN=NEB	P20929-2	NEB	987 kDa	0.82997	0	#DIV/0!
Chromobox protein homolog 5 OS=Homo sapiens OX=9606 GN=CBX5 PE=1 SV=1	P45973	CBX5	22 kDa	0.82997	0	#DIV/0!
Doublecortin domain-containing protein 1 OS=Homo sapiens OX=9606 GN=DCDC1 PE=1 SV=1	M0R2J8	DCDC1	201 kDa	0.82997	0	#DIV/0!
Partitioning defective 6 homolog beta OS=Homo sapiens OX=9606 GN=PARD6B PE=1 SV=1	Q9BYG5	PARD6B	41 kDa	0.82997	0	#DIV/0!
ATP synthase F(0) complex subunit B1, mitochondrial OS=Homo sapiens OX=9606 GN=ATP5PB PE=1 SV=2	P24539 (+1)	ATP5PB	29 kDa	0.82997	0	#DIV/0!
Spliceosome-associated protein CWC15 homolog OS=Homo sapiens OX=9606 GN=CWC15 PE=1 SV=2	Q9P013	CWC15	27 kDa	0.82997	0	#DIV/0!
Structural maintenance of chromosomes protein OS=Entamoeba histolytica OX=5759 GN=EHI_164820 PE=3 SV=1	C4M1X5	EHI_164820	142 kDa	0.82997	0	#DIV/0!
Tyrosine-protein kinase OS=Homo sapiens OX=9606 GN=YES1 PE=1 SV=1	J3QRU1 (+1)	YES1	61 kDa	0.82997	0	#DIV/0!
39S ribosomal protein L48, mitochondrial OS=Homo sapiens OX=9606 GN=MRPL48 PE=1 SV=1	F5H702 (+2)	MRPL48	13 kDa	0.82997	0	#DIV/0!
Obg-like ATPase 1 OS=Homo sapiens OX=9606 GN=OLA1 PE=1 SV=1	J3KQ32 (+1)	OLA1	47 kDa	0.82997	0	#DIV/0!
39S ribosomal protein L46, mitochondrial OS=Homo sapiens OX=9606 GN=MRPL46 PE=1 SV=1	Q9H2W6	MRPL46	32 kDa	0.82997	0	#DIV/0!
Ankyrin-2 OS=Homo sapiens OX=9606 GN=ANK2 PE=1 SV=1	A0A5F9ZHS1 (+1)	ANK2	437 kDa	0.82997	0	#DIV/0!
CTD small phosphatase-like protein 2 OS=Homo sapiens OX=9606 GN=CTDSPL2 PE=1 SV=2	Q05D32 (+1)	CTDSPL2	53 kDa	0.82997	0	#DIV/0!
Polyadenylate-binding protein 1-like (Fragment) OS=Homo sapiens OX=9606 GN=PABPC1L PE=1 SV=1	A0A6I8PIK9	PABPC1L	8 kDa	0.82997	0	#DIV/0!
Zinc finger CCCH domain-containing protein 14 OS=Homo sapiens OX=9606 GN=ZC3H14 PE=1 SV=1	G3V256 (+7)	ZC3H14	68 kDa	0.82997	0	#DIV/0!
Histone-lysine N-methyltransferase SETD1A OS=Homo sapiens OX=9606 GN=SETD1A PE=1 SV=3	O15047	SETD1A	186 kDa	0.82997	0	#DIV/0!
Keratin, type I cytoskeletal 28 OS=Homo sapiens OX=9606 GN=KRT28 PE=1 SV=2	Q7Z3Y7	KRT28	51 kDa	0	0	#DIV/0!
Tubulin beta-2A chain OS=Homo sapiens OX=9606 GN=TUBB2A PE=1 SV=1	Q13885	TUBB2A	50 kDa	0	0	#DIV/0!
Keratin, type II cytoskeletal 2 oral OS=Homo sapiens OX=9606 GN=KRT76 PE=1 SV=2	Q01546	KRT76	66 kDa	0	0	#DIV/0!
Polyadenylate-binding protein 4 (Fragment) OS=Homo sapiens OX=9606 GN=PABPC4 PE=1 SV=1	H0YEQ8	PABPC4	13 kDa	0	0	#DIV/0!
Keratin, type II cytoskeletal 79 OS=Homo sapiens OX=9606 GN=KRT79 PE=1 SV=2	Q5XKE5	KRT79	58 kDa	0	0	#DIV/0!
Myosin-10 OS=Homo sapiens OX=9606 GN=MYH10 PE=1 SV=3	P35580 (+4)	MYH10	229 kDa	0	0	#DIV/0!
ATP-dependent RNA helicase DDX39A OS=Homo sapiens OX=9606 GN=DDX39A PE=1 SV=2	O00148	DDX39A	49 kDa	0	0	#DIV/0!
Histone H1.4 OS=Homo sapiens OX=9606 GN=H1-4 PE=1 SV=2	P10412	H1-4	22 kDa	0	0	#DIV/0!
Keratin, type II cytoskeletal 72 OS=Homo sapiens OX=9606 GN=KRT72 PE=1 SV=2	Q14CN4 (+1)	KRT72	56 kDa	0	0	#DIV/0!
N-alpha-acetyltransferase 16, NatA auxiliary subunit OS=Homo sapiens OX=9606 GN=NAA16 PE=1 SV=2	Q6N069	NAA16	101 kDa	0	0	#DIV/0!
Serine/arginine-rich splicing factor 4 OS=Homo sapiens OX=9606 GN=SRSF4 PE=1 SV=2	Q08170	SRSF4	57 kDa	0	0	#DIV/0!
Ras GTPase-activating-like protein IQGAP2 OS=Homo sapiens OX=9606 GN=IQGAP2 PE=1 SV=2	F5H7S7 (+1)	IQGAP2	174 kDa	0	0	#DIV/0!
60S ribosomal protein L7, putative OS=Entamoeba histolytica OX=5759 GN=EHI_010650 PE=2 SV=1	C4LYV2 (+3)	EHI_010650	26 kDa	0	0	#DIV/0!
S-adenosylmethionine synthase isoform type-2 OS=Homo sapiens OX=9606 GN=MAT2A PE=1 SV=1	P31153	MAT2A	44 kDa	0	0	#DIV/0!
Serine/threonine-protein phosphatase PP1-beta catalytic subunit OS=Homo sapiens OX=9606 GN=PPP1CB PE=1 SV=3	P62140	PPP1CB	37 kDa	0	0	#DIV/0!
Keratin, type II cuticular Hb4 OS=Homo sapiens OX=9606 GN=KRT84 PE=2 SV=2	Q9NSB2	KRT84	65 kDa	0	0	#DIV/0!
Alanine--tRNA ligase OS=Homo sapiens OX=9606 GN=AARS1 PE=1 SV=1	A0A6Q8PF33 (+5)	AARS1	106 kDa	0	0	#DIV/0!
Plastin-2 OS=Homo sapiens OX=9606 GN=LCP1 PE=1 SV=6	P13796	LCP1	70 kDa	0	0	#DIV/0!
Vesicle-associated membrane protein-associated protein A OS=Homo sapiens OX=9606 GN=VAPA PE=1 SV=3	Q9P0L0	VAPA	28 kDa	0	0	#DIV/0!
General transcription factor 3C polypeptide 2 OS=Homo sapiens OX=9606 GN=GTF3C2 PE=1 SV=2	Q8WUA4	GTF3C2	101 kDa	0	0	#DIV/0!
6-phosphogluconate dehydrogenase, decarboxylating OS=Homo sapiens OX=9606 GN=PGD PE=1 SV=3	P52209 (+1)	PGD	53 kDa	0	0	#DIV/0!
Protein S100-A10 OS=Homo sapiens OX=9606 GN=S100A10 PE=1 SV=2	P60903	S100A10	11 kDa	0	0	#DIV/0!
Nucleoporin SEH1 OS=Homo sapiens OX=9606 GN=SEH1L PE=1 SV=3	Q96EE3 (+1)	SEH1L	40 kDa	0	0	#DIV/0!
E3 ubiquitin-protein ligase UBR4 OS=Homo sapiens OX=9606 GN=UBR4 PE=1 SV=1	Q5T4S7 (+3)	UBR4	574 kDa	0	0	#DIV/0!
Ubiquitin-like modifier-activating enzyme 1 OS=Homo sapiens OX=9606 GN=UBA1 PE=1 SV=3	P22314 (+1)	UBA1	118 kDa	0	0	#DIV/0!
Glycogen phosphorylase, liver form OS=Homo sapiens OX=9606 GN=PYGL PE=1 SV=4	P06737 (+1)	PYGL	97 kDa	0	0	#DIV/0!
Ras-related protein Rab-13 OS=Homo sapiens OX=9606 GN=RAB13 PE=1 SV=1	P51153	RAB13	23 kDa	0	0	#DIV/0!
Aldehyde dehydrogenase OS=Homo sapiens OX=9606 GN=ALDH3A2 PE=1 SV=1	A0A5F9ZHN9 (+2)	ALDH3A2	59 kDa	0	0	#DIV/0!
Abl interactor 1 OS=Homo sapiens OX=9606 GN=ABI1 PE=1 SV=1	A0A0A0MRT6 (+7)	ABI1	52 kDa	0	0	#DIV/0!
Na(+)/H(+) exchange regulatory cofactor NHE-RF1 OS=Homo sapiens OX=9606 GN=SLC9A3R1 PE=1 SV=4	O14745	SLC9A3R1	39 kDa	0	0	#DIV/0!
Extended synaptotagmin-1 OS=Homo sapiens OX=9606 GN=ESYT1 PE=1 SV=1	Q9BSJ8 (+1)	ESYT1	123 kDa	0	0	#DIV/0!
Transmembrane 9 superfamily member 3 OS=Homo sapiens OX=9606 GN=TM9SF3 PE=1 SV=2	Q9HD45	TM9SF3	68 kDa	0	0	#DIV/0!
ADP-ribosylation factor 5 (Fragment) OS=Homo sapiens OX=9606 GN=ARF5 PE=1 SV=1	C9J1Z8 (+1)	ARF5	17 kDa	0	0	#DIV/0!
Keratin, type II cuticular Hb2 OS=Homo sapiens OX=9606 GN=KRT82 PE=1 SV=3	Q9NSB4	KRT82	57 kDa	0	0	#DIV/0!
Histone-arginine methyltransferase CARM1 OS=Homo sapiens OX=9606 GN=CARM1 PE=1 SV=3	Q86X55 (+1)	CARM1	66 kDa	0	0	#DIV/0!
CD2-associated protein OS=Homo sapiens OX=9606 GN=CD2AP PE=1 SV=1	Q9Y5K6	CD2AP	71 kDa	0	0	#DIV/0!
Tripartite motif-containing protein 3 OS=Homo sapiens OX=9606 GN=TRIM3 PE=1 SV=1	A0A1W2PPI7 (+3)	TRIM3	76 kDa	0	0	#DIV/0!
Prolyl 3-hydroxylase 3 OS=Homo sapiens OX=9606 GN=P3H3 PE=1 SV=1	Q8IVL6	P3H3	82 kDa	0	0	#DIV/0!
Uncharacterized protein OS=Entamoeba histolytica OX=5759 GN=EHI_101240 PE=4 SV=1	C4M8B5	EHI_101240	96 kDa	0	0	#DIV/0!
General vesicular transport factor p115 OS=Homo sapiens OX=9606 GN=USO1 PE=1 SV=2	O60763 (+1)	USO1	108 kDa	0	0	#DIV/0!
Cingulin OS=Homo sapiens OX=9606 GN=CGN PE=1 SV=2	Q9P2M7	CGN	136 kDa	0	0	#DIV/0!
Cullin-1 OS=Homo sapiens OX=9606 GN=CUL1 PE=1 SV=1	A0A0C4DGX4 (+4)	CUL1	87 kDa	0	0	#DIV/0!
3-beta-hydroxysterol Delta (14)-reductase OS=Homo sapiens OX=9606 GN=LBR PE=1 SV=1	A0A494C1L1 (+1)	LBR	47 kDa	0	0	#DIV/0!
10 kDa heat shock protein, mitochondrial OS=Homo sapiens OX=9606 GN=HSPE1-MOB4 PE=1 SV=1	S4R3N1	HSPE1-MOB4	30 kDa	0	0	#DIV/0!
Guanine nucleotide-binding protein-like 1 OS=Homo sapiens OX=9606 GN=GNL1 PE=1 SV=2	P36915	GNL1	69 kDa	0	0	#DIV/0!
Ras family GTPase OS=Entamoeba histolytica OX=5759 GN=EHI_058090 PE=2 SV=1	C4M8B0	EHI_058090	21 kDa	0	0	#DIV/0!
Prostaglandin E synthase 3 OS=Homo sapiens OX=9606 GN=PTGES3 PE=1 SV=1	A0A087WYT3 (+3)	PTGES3	19 kDa	0	0	#DIV/0!
Dynein heavy chain 10, axonemal OS=Homo sapiens OX=9606 GN=DNAH10 PE=1 SV=1	A0A1C7CYW8 (+2)	DNAH10	522 kDa	0	0	#DIV/0!
Proteasome activator complex subunit 3 OS=Homo sapiens OX=9606 GN=PSME3 PE=1 SV=1	K9J957 (+3)	PSME3	27 kDa	0	0	#DIV/0!
PHD finger protein 6 OS=Homo sapiens OX=9606 GN=PHF6 PE=1 SV=1	A0A0D9SGE8 (+4)	PHF6	41 kDa	0	0	#DIV/0!
Malate dehydrogenase OS=Homo sapiens OX=9606 GN=MDH1 PE=1 SV=1	A0A5K1VW95 (+4)	MDH1	39 kDa	0	0	#DIV/0!
Growth factor receptor-bound protein 2 OS=Homo sapiens OX=9606 GN=GRB2 PE=1 SV=1	P62993	GRB2	25 kDa	0	0	#DIV/0!
Endoribonuclease Dicer OS=Homo sapiens OX=9606 GN=DICER1 PE=1 SV=3	Q9UPY3	DICER1	219 kDa	0	0	#DIV/0!
Prolyl 4-hydroxylase subunit alpha-1 OS=Homo sapiens OX=9606 GN=P4HA1 PE=1 SV=2	P13674 (+1)	P4HA1	61 kDa	0	0	#DIV/0!
Myristoylated alanine-rich C-kinase substrate OS=Homo sapiens OX=9606 GN=MARCKS PE=1 SV=4	P29966	MARCKS	32 kDa	0	0	#DIV/0!
Enhancer binding protein-2, putative OS=Entamoeba histolytica OX=5759 GN=EHI_182670 PE=4 SV=1	C4LV48	EHI_182670	26 kDa	0	0	#DIV/0!
Ubiquitin conjugation factor E4 A OS=Homo sapiens OX=9606 GN=UBE4A PE=1 SV=2	Q14139 (+1)	UBE4A	123 kDa	0	0	#DIV/0!
Vesicle-fusing ATPase OS=Homo sapiens OX=9606 GN=NSF PE=1 SV=1	I3L0N3 (+2)	NSF	82 kDa	0	0	#DIV/0!
40S ribosomal protein S5 OS=Entamoeba histolytica OX=5759 GN=EHI_044590 PE=2 SV=1	C4LT81 (+1)	EHI_044590	23 kDa	0	0	#DIV/0!
tRNA (adenine(58)-N(1))-methyltransferase non-catalytic subunit TRM6 OS=Homo sapiens OX=9606 GN=TRMT6 PE=1 SV=1	Q9UJA5	TRMT6	56 kDa	0	0	#DIV/0!
Retinal dehydrogenase 1 OS=Homo sapiens OX=9606 GN=ALDH1A1 PE=1 SV=2	P00352	ALDH1A1	55 kDa	0	0	#DIV/0!
Isoform 2 of mRNA cap guanine-N7 methyltransferase OS=Homo sapiens OX=9606 GN=RNMT	O43148-2	RNMT	58 kDa	0	0	#DIV/0!
Exosome complex component RRP45 OS=Homo sapiens OX=9606 GN=EXOSC9 PE=1 SV=3	Q06265 (+1)	EXOSC9	49 kDa	0	0	#DIV/0!
Pyrin OS=Homo sapiens OX=9606 GN=MEFV PE=1 SV=1	F5H2E5 (+4)	MEFV	68 kDa	0	0	#DIV/0!
Probable ATP-dependent RNA helicase DDX20 OS=Homo sapiens OX=9606 GN=DDX20 PE=1 SV=2	Q9UHI6	DDX20	92 kDa	0	0	#DIV/0!
Rho-related GTP-binding protein RhoG OS=Homo sapiens OX=9606 GN=RHOG PE=1 SV=1	P84095	RHOG	21 kDa	0	0	#DIV/0!
Transforming acidic coiled-coil-containing protein 2 OS=Homo sapiens OX=9606 GN=TACC2 PE=1 SV=1	E7EMZ9 (+3)	TACC2	297 kDa	0	0	#DIV/0!
Endoplasmic reticulum-Golgi intermediate compartment protein 3 OS=Homo sapiens OX=9606 GN=ERGIC3 PE=1 SV=1	A0A1W2PPS8 (+4)	ERGIC3	22 kDa	0	0	#DIV/0!
Dynein assembly factor 5, axonemal OS=Homo sapiens OX=9606 GN=DNAAF5 PE=1 SV=4	Q86Y56	DNAAF5	94 kDa	0	0	#DIV/0!
Ras-related protein Rab-35 (Fragment) OS=Homo sapiens OX=9606 GN=RAB35 PE=1 SV=1	F5H157 (+1)	RAB35	21 kDa	0	0	#DIV/0!
Importin subunit alpha-5 OS=Homo sapiens OX=9606 GN=KPNA1 PE=1 SV=3	P52294	KPNA1	60 kDa	0	0	#DIV/0!
Reticulocalbin-2 OS=Homo sapiens OX=9606 GN=RCN2 PE=1 SV=1	Q14257 (+1)	RCN2	37 kDa	0	0	#DIV/0!
Sec1 family domain-containing protein 1 OS=Homo sapiens OX=9606 GN=SCFD1 PE=4 SV=1	A0A7I2V2U5 (+10)	SCFD1	55 kDa	0	0	#DIV/0!
26S proteasome regulatory subunit 6B OS=Homo sapiens OX=9606 GN=PSMC4 PE=1 SV=2	P43686	PSMC4	47 kDa	0	0	#DIV/0!
Calmodulin-regulated spectrin-associated protein 3 OS=Homo sapiens OX=9606 GN=CAMSAP3 PE=1 SV=2	Q9P1Y5 (+1)	CAMSAP3	135 kDa	0	0	#DIV/0!
Synaptic vesicle membrane protein VAT-1 homolog OS=Homo sapiens OX=9606 GN=VAT1 PE=1 SV=2	Q99536	VAT1	42 kDa	0	0	#DIV/0!
Ubiquitin recognition factor in ER-associated degradation protein 1 OS=Homo sapiens OX=9606 GN=UFD1 PE=1 SV=3	Q92890 (+1)	UFD1	35 kDa	0	0	#DIV/0!
Sorting nexin OS=Homo sapiens OX=9606 GN=SNX6 PE=1 SV=1	A0A0A0MRI2 (+1)	SNX6	48 kDa	0	0	#DIV/0!
Laminin subunit beta-1 OS=Homo sapiens OX=9606 GN=LAMB1 PE=4 SV=1	A0A7I2V4J9 (+2)	LAMB1	187 kDa	0	0	#DIV/0!
Annexin A6 OS=Homo sapiens OX=9606 GN=ANXA6 PE=1 SV=3	P08133 (+1)	ANXA6	76 kDa	0	0	#DIV/0!
Replication factor C subunit 2 OS=Homo sapiens OX=9606 GN=RFC2 PE=1 SV=3	P35250 (+1)	RFC2	39 kDa	0	0	#DIV/0!
DnaJ homolog subfamily C member 1 OS=Homo sapiens OX=9606 GN=DNAJC1 PE=1 SV=1	Q96KC8	DNAJC1	64 kDa	0	0	#DIV/0!
FAS-associated factor 2 OS=Homo sapiens OX=9606 GN=FAF2 PE=1 SV=2	Q96CS3	FAF2	53 kDa	0	0	#DIV/0!
Squamous cell carcinoma antigen recognized by T-cells 3 OS=Homo sapiens OX=9606 GN=SART3 PE=1 SV=1	Q15020 (+1)	SART3	110 kDa	0	0	#DIV/0!
Aldehyde dehydrogenase X, mitochondrial OS=Homo sapiens OX=9606 GN=ALDH1B1 PE=1 SV=3	P30837	ALDH1B1	57 kDa	0	0	#DIV/0!
Mucin-like protein 1 OS=Homo sapiens OX=9606 GN=MUCL1 PE=1 SV=1	A0A087WWF8 (+2)	MUCL1	8 kDa	0	0	#DIV/0!
Exosome complex component RRP41 OS=Homo sapiens OX=9606 GN=EXOSC4 PE=1 SV=3	Q9NPD3	EXOSC4	26 kDa	0	0	#DIV/0!
Leukocyte elastase inhibitor OS=Homo sapiens OX=9606 GN=SERPINB1 PE=1 SV=1	P30740	SERPINB1	43 kDa	0	0	#DIV/0!
UPF0488 protein C8orf33 OS=Homo sapiens OX=9606 GN=C8orf33 PE=1 SV=1	A0A3B3IRR6 (+4)	C8orf33	24 kDa	0	0	#DIV/0!
Ribosomal RNA processing protein 1 homolog A OS=Homo sapiens OX=9606 GN=RRP1 PE=1 SV=1	P56182	RRP1	53 kDa	0	0	#DIV/0!
Enoyl-CoA delta isomerase 1, mitochondrial (Fragment) OS=Homo sapiens OX=9606 GN=ECI1 PE=1 SV=1	H3BS70 (+3)	ECI1	25 kDa	0	0	#DIV/0!
LIM and senescent cell antigen-like-containing domain protein 1 OS=Homo sapiens OX=9606 GN=LIMS1 PE=1 SV=4	P48059	LIMS1	37 kDa	0	0	#DIV/0!
Very long-chain acyl-CoA synthetase OS=Homo sapiens OX=9606 GN=SLC27A2 PE=1 SV=2	O14975 (+1)	SLC27A2	70 kDa	0	0	#DIV/0!
Very-long-chain (3R)-3-hydroxyacyl-CoA dehydratase 2 OS=Homo sapiens OX=9606 GN=HACD2 PE=1 SV=1	Q6Y1H2	HACD2	28 kDa	0	0	#DIV/0!
BRCA2-interacting transcriptional repressor EMSY OS=Homo sapiens OX=9606 GN=EMSY PE=1 SV=1	E9PMC9 (+5)	EMSY	131 kDa	0	0	#DIV/0!
Protein transport protein Sec24C OS=Homo sapiens OX=9606 GN=SEC24C PE=1 SV=1	G5EA31 (+1)	SEC24C	112 kDa	0	0	#DIV/0!
60S ribosomal protein L9, putative OS=Entamoeba histolytica OX=5759 GN=EHI_126140 PE=2 SV=1	C4LVZ9 (+1)	EHI_126140	22 kDa	0	0	#DIV/0!
Mothers against decapentaplegic homolog 9 OS=Homo sapiens OX=9606 GN=SMAD9 PE=1 SV=1	O15198 (+1)	SMAD9	52 kDa	0	0	#DIV/0!
Charged multivesicular body protein 1b OS=Homo sapiens OX=9606 GN=CHMP1B PE=1 SV=1	Q7LBR1	CHMP1B	22 kDa	0	0	#DIV/0!
Rab3 GTPase-activating protein catalytic subunit OS=Homo sapiens OX=9606 GN=RAB3GAP1 PE=1 SV=3	Q15042 (+1)	RAB3GAP1	111 kDa	0	0	#DIV/0!
Vitronectin OS=Homo sapiens OX=9606 GN=VTN PE=1 SV=1	P04004	VTN	54 kDa	0	0	#DIV/0!
Mitogen-activated protein kinase OS=Homo sapiens OX=9606 GN=MAPK10 PE=1 SV=1	F8W9R5	MAPK10	54 kDa	0	0	#DIV/0!
Ketosamine-3-kinase OS=Homo sapiens OX=9606 GN=FN3KRP PE=1 SV=2	Q9HA64	FN3KRP	34 kDa	0	0	#DIV/0!
Microtubule-associated protein 1S OS=Homo sapiens OX=9606 GN=MAP1S PE=1 SV=2	Q66K74 (+1)	MAP1S	112 kDa	0	0	#DIV/0!
Prolactin regulatory element-binding protein (Fragment) OS=Homo sapiens OX=9606 GN=PREB PE=1 SV=1	H7C0W3	PREB	19 kDa	0	0	#DIV/0!
Telomere length regulation protein TEL2 homolog OS=Homo sapiens OX=9606 GN=TELO2 PE=1 SV=2	Q9Y4R8	TELO2	92 kDa	0	0	#DIV/0!
Rae1 protein homolog OS=Homo sapiens OX=9606 GN=RAE1 PE=1 SV=1	E9PPG9 (+2)	RAE1	24 kDa	0	0	#DIV/0!
DNA mismatch repair protein OS=Homo sapiens OX=9606 GN=MSH2 PE=1 SV=1	A0A2R8Y6P0	MSH2	103 kDa	0	0	#DIV/0!
Splicing factor 3A subunit 1 OS=Homo sapiens OX=9606 GN=SF3A1 PE=1 SV=1	Q15459	SF3A1	89 kDa	0	0	#DIV/0!
AT-rich interactive domain-containing protein 3A OS=Homo sapiens OX=9606 GN=ARID3A PE=1 SV=2	Q99856	ARID3A	63 kDa	0	0	#DIV/0!
Melanoma-associated antigen D2 OS=Homo sapiens OX=9606 GN=MAGED2 PE=1 SV=2	Q5H909 (+2)	MAGED2	63 kDa	0	0	#DIV/0!
Brefeldin A-inhibited guanine nucleotide-exchange protein 2 OS=Homo sapiens OX=9606 GN=ARFGEF2 PE=1 SV=3	Q9Y6D5	ARFGEF2	202 kDa	0	0	#DIV/0!
Saccharopine dehydrogenase-like oxidoreductase OS=Homo sapiens OX=9606 GN=SCCPDH PE=1 SV=1	Q8NBX0	SCCPDH	47 kDa	0	0	#DIV/0!
Liver carboxylesterase 1 OS=Homo sapiens OX=9606 GN=CES1 PE=1 SV=2	P23141 (+2)	CES1	63 kDa	0	0	#DIV/0!
Annexin A9 OS=Homo sapiens OX=9606 GN=ANXA9 PE=1 SV=3	O76027	ANXA9	38 kDa	0	0	#DIV/0!
ERO1-like protein alpha OS=Homo sapiens OX=9606 GN=ERO1A PE=1 SV=2	Q96HE7	ERO1A	54 kDa	0	0	#DIV/0!
Phosphoenolpyruvate carboxykinase [GTP], mitochondrial OS=Homo sapiens OX=9606 GN=PCK2 PE=1 SV=4	Q16822	PCK2	71 kDa	0	0	#DIV/0!
Endoplasmic reticulum resident protein 29 OS=Homo sapiens OX=9606 GN=ERP29 PE=1 SV=4	P30040	ERP29	29 kDa	0	0	#DIV/0!
Extended synaptotagmin-2 OS=Homo sapiens OX=9606 GN=ESYT2 PE=1 SV=1	A0A499FIX8 (+2)	ESYT2	94 kDa	0	0	#DIV/0!
Disco-interacting protein 2 homolog B OS=Homo sapiens OX=9606 GN=DIP2B PE=1 SV=3	Q9P265	DIP2B	171 kDa	0	0	#DIV/0!
ARF GTPase-activating protein GIT1 OS=Homo sapiens OX=9606 GN=GIT1 PE=1 SV=1	A0A0C4DGN6 (+3)	GIT1	83 kDa	0	0	#DIV/0!
Lipid droplet-regulating VLDL assembly factor AUP1 OS=Homo sapiens OX=9606 GN=AUP1 PE=1 SV=2	Q9Y679	AUP1	46 kDa	0	0	#DIV/0!
Thioredoxin OS=Homo sapiens OX=9606 GN=TXN PE=1 SV=3	P10599 (+1)	TXN	12 kDa	0	0	#DIV/0!
Microtubule-actin cross-linking factor 1, isoforms 1/2/3/5 OS=Homo sapiens OX=9606 GN=MACF1 PE=1 SV=1	H3BPE1 (+2)	MACF1	857 kDa	0	0	#DIV/0!
Mitochondrial amidoxime-reducing component 1 OS=Homo sapiens OX=9606 GN=MTARC1 PE=1 SV=1	Q5VT66 (+1)	MTARC1	38 kDa	0	0	#DIV/0!
Isoform 2 of Aspartyl aminopeptidase OS=Homo sapiens OX=9606 GN=DNPEP	Q9ULA0-2	DNPEP	52 kDa	0	0	#DIV/0!
AP-3 complex subunit sigma-1 OS=Homo sapiens OX=9606 GN=AP3S1 PE=1 SV=1	Q92572	AP3S1	22 kDa	0	0	#DIV/0!
Ubiquitinyl hydrolase 1 OS=Homo sapiens OX=9606 GN=OTUD6B PE=1 SV=1	A0A087X0W9 (+2)	OTUD6B	37 kDa	0	0	#DIV/0!
26S proteasome non-ATPase regulatory subunit 4 OS=Homo sapiens OX=9606 GN=PSMD4 PE=1 SV=1	P55036 (+1)	PSMD4	41 kDa	0	0	#DIV/0!
N-alpha-acetyltransferase 35, NatC auxiliary subunit OS=Homo sapiens OX=9606 GN=NAA35 PE=1 SV=1	Q5VZE5	NAA35	84 kDa	0	0	#DIV/0!
Acetyl-CoA acetyltransferase, cytosolic OS=Homo sapiens OX=9606 GN=ACAT2 PE=1 SV=2	Q9BWD1 (+1)	ACAT2	41 kDa	0	0	#DIV/0!
Dynactin subunit 2 OS=Homo sapiens OX=9606 GN=DCTN2 PE=4 SV=1	A0A7I2V4H4 (+5)	DCTN2	42 kDa	0	0	#DIV/0!
Glycerol-3-phosphate dehydrogenase, mitochondrial OS=Homo sapiens OX=9606 GN=GPD2 PE=1 SV=3	P43304 (+1)	GPD2	81 kDa	0	0	#DIV/0!
N-acetyltransferase ESCO1 OS=Homo sapiens OX=9606 GN=ESCO1 PE=1 SV=3	Q5FWF5 (+1)	ESCO1	95 kDa	0	0	#DIV/0!
Anterior gradient protein 2 homolog (Fragment) OS=Homo sapiens OX=9606 GN=AGR2 PE=1 SV=1	H7C3Z9	AGR2	13 kDa	0	0	#DIV/0!
Nuclear cap-binding protein subunit 2 OS=Homo sapiens OX=9606 GN=NCBP2 PE=1 SV=1	B3KSB0 (+4)	NCBP2	10 kDa	0	0	#DIV/0!
Etoposide-induced protein 2.4 homolog OS=Homo sapiens OX=9606 GN=EI24 PE=1 SV=2	E9PK61 (+6)	EI24	30 kDa	0	0	#DIV/0!
26S proteasome non-ATPase regulatory subunit 14 OS=Homo sapiens OX=9606 GN=PSMD14 PE=1 SV=1	O00487	PSMD14	35 kDa	0	0	#DIV/0!
59 kDa serine/threonine-protein kinase OS=Homo sapiens OX=9606 GN=ILK PE=1 SV=1	A0A0A0MTH3 (+1)	ILK	55 kDa	0	0	#DIV/0!
AAR2 splicing factor homolog OS=Homo sapiens OX=9606 GN=AAR2 PE=1 SV=1	A2A2Q9 (+1)	AAR2	45 kDa	0	0	#DIV/0!
WD repeat-containing protein 18 (Fragment) OS=Homo sapiens OX=9606 GN=WDR18 PE=1 SV=1	A0A0A0MQU0 (+3)	WDR18	47 kDa	0	0	#DIV/0!
Asparagine synthetase [glutamine-hydrolyzing] OS=Homo sapiens OX=9606 GN=ASNS PE=1 SV=4	P08243 (+1)	ASNS	64 kDa	0	0	#DIV/0!
Exosome complex component RRP40 OS=Homo sapiens OX=9606 GN=EXOSC3 PE=1 SV=3	Q9NQT5	EXOSC3	30 kDa	0	0	#DIV/0!
Transforming acidic coiled-coil-containing protein 1 OS=Homo sapiens OX=9606 GN=TACC1 PE=1 SV=1	E7ET87 (+10)	TACC1	67 kDa	0	0	#DIV/0!
Protein XRP2 OS=Homo sapiens OX=9606 GN=RP2 PE=1 SV=4	O75695	RP2	40 kDa	0	0	#DIV/0!
Laminin subunit gamma-1 OS=Homo sapiens OX=9606 GN=LAMC1 PE=1 SV=3	P11047	LAMC1	178 kDa	0	0	#DIV/0!
U4/U6 small nuclear ribonucleoprotein Prp3 OS=Homo sapiens OX=9606 GN=PRPF3 PE=1 SV=2	O43395	PRPF3	78 kDa	0	0	#DIV/0!
Ankyrin repeat and zinc finger domain-containing protein 1 OS=Homo sapiens OX=9606 GN=ANKZF1 PE=1 SV=1	B8ZZS4 (+1)	ANKZF1	58 kDa	0	0	#DIV/0!
Transmembrane 9 superfamily member OS=Homo sapiens OX=9606 GN=TM9SF4 PE=1 SV=1	A0A0C4DFM1 (+1)	TM9SF4	73 kDa	0	0	#DIV/0!
Programmed cell death protein 10 (Fragment) OS=Homo sapiens OX=9606 GN=PDCD10 PE=1 SV=1	C9J5C3 (+2)	PDCD10	24 kDa	0	0	#DIV/0!
STIM1L OS=Homo sapiens OX=9606 GN=STIM1 PE=1 SV=1	G0XQ39 (+2)	STIM1	89 kDa	0	0	#DIV/0!
Methylcrotonoyl-CoA carboxylase beta chain, mitochondrial OS=Homo sapiens OX=9606 GN=MCCC2 PE=1 SV=1	Q9HCC0 (+1)	MCCC2	61 kDa	0	0	#DIV/0!
Condensin complex subunit 2 OS=Homo sapiens OX=9606 GN=NCAPH PE=1 SV=1	E9PHA2 (+2)	NCAPH	82 kDa	0	0	#DIV/0!
Prosaposin OS=Homo sapiens OX=9606 GN=PSAP PE=1 SV=2	C9JIZ6 (+3)	PSAP	58 kDa	0	0	#DIV/0!
Thioredoxin-related transmembrane protein 1 OS=Homo sapiens OX=9606 GN=TMX1 PE=1 SV=1	Q9H3N1	TMX1	32 kDa	0	0	#DIV/0!
Protein SDA1 OS=Homo sapiens OX=9606 GN=SDAD1 PE=1 SV=1	E7EW05 (+1)	SDAD1	75 kDa	0	0	#DIV/0!
Serine/threonine-protein phosphatase 2A 55 kDa regulatory subunit B alpha isoform OS=Homo sapiens OX=9606 GN=PPP2R2A PE=1 SV=1	P63151 (+1)	PPP2R2A	52 kDa	0	0	#DIV/0!
4-hydroxyphenylpyruvate dioxygenase-like protein OS=Homo sapiens OX=9606 GN=HPDL PE=1 SV=1	Q96IR7	HPDL	39 kDa	0	0	#DIV/0!
Choline-phosphate cytidylyltransferase A OS=Homo sapiens OX=9606 GN=PCYT1A PE=1 SV=1	C9JEJ2	PCYT1A	43 kDa	0	0	#DIV/0!
Twinfilin-1 OS=Homo sapiens OX=9606 GN=TWF1 PE=1 SV=3	Q12792 (+2)	TWF1	40 kDa	0	0	#DIV/0!
Calpain-2 catalytic subunit OS=Homo sapiens OX=9606 GN=CAPN2 PE=1 SV=6	P17655	CAPN2	80 kDa	0	0	#DIV/0!
Beta-arrestin-1 OS=Homo sapiens OX=9606 GN=ARRB1 PE=1 SV=2	P49407 (+1)	ARRB1	47 kDa	0	0	#DIV/0!
Prolactin regulatory element-binding protein OS=Homo sapiens OX=9606 GN=PREB PE=1 SV=2	Q9HCU5	PREB	45 kDa	0	0	#DIV/0!
Beta-hexosaminidase subunit beta OS=Homo sapiens OX=9606 GN=HEXB PE=1 SV=3	P07686	HEXB	63 kDa	0	0	#DIV/0!
Protein sel-1 homolog 1 OS=Homo sapiens OX=9606 GN=SEL1L PE=1 SV=3	Q9UBV2	SEL1L	89 kDa	0	0	#DIV/0!
Inhibitor of nuclear factor kappa-B kinase-interacting protein OS=Homo sapiens OX=9606 GN=IKBIP PE=1 SV=1	Q70UQ0	IKBIP	39 kDa	0	0	#DIV/0!
Heme oxygenase 1 OS=Homo sapiens OX=9606 GN=HMOX1 PE=1 SV=1	P09601	HMOX1	33 kDa	0	0	#DIV/0!
Transportin-3 OS=Homo sapiens OX=9606 GN=TNPO3 PE=1 SV=1	C9J7E5 (+4)	TNPO3	108 kDa	0	0	#DIV/0!
Heterogeneous nuclear ribonucleoprotein L-like OS=Homo sapiens OX=9606 GN=HNRNPLL PE=1 SV=1	B7WPG3 (+5)	HNRNPLL	56 kDa	0	0	#DIV/0!
Annexin A1 OS=Homo sapiens OX=9606 GN=ANXA1 PE=1 SV=2	P04083	ANXA1	39 kDa	0	0	#DIV/0!
Cytochrome P450 2S1 OS=Homo sapiens OX=9606 GN=CYP2S1 PE=1 SV=2	Q96SQ9 (+1)	CYP2S1	56 kDa	0	0	#DIV/0!
Eukaryotic translation initiation factor 1 OS=Homo sapiens OX=9606 GN=EIF1 PE=1 SV=1	K7EM18 (+2)	EIF1	14 kDa	0	0	#DIV/0!
Protein Shroom3 OS=Homo sapiens OX=9606 GN=SHROOM3 PE=1 SV=1	A0A2R8Y5P9 (+1)	SHROOM3	208 kDa	0	0	#DIV/0!
Splicing factor 3A subunit 2 (Fragment) OS=Homo sapiens OX=9606 GN=SF3A2 PE=1 SV=2	K7EMT0 (+1)	SF3A2	15 kDa	0	0	#DIV/0!
Protein jagunal homolog 1 OS=Homo sapiens OX=9606 GN=JAGN1 PE=1 SV=1	A0A3B3ITE9 (+1)	JAGN1	6 kDa	0	0	#DIV/0!
Protein TOPAZ1 OS=Homo sapiens OX=9606 GN=TOPAZ1 PE=2 SV=3	Q8N9V7	TOPAZ1	191 kDa	0	0	#DIV/0!
DDRGK domain-containing protein 1 OS=Homo sapiens OX=9606 GN=DDRGK1 PE=1 SV=1	A0A0A0MRX2 (+2)	DDRGK1	34 kDa	0	0	#DIV/0!
Aldo-keto reductase family 1 member C3 OS=Homo sapiens OX=9606 GN=AKR1C3 PE=1 SV=1	A0A0A0MSS8 (+6)	AKR1C3	37 kDa	0	0	#DIV/0!
Transmembrane protein 245 OS=Homo sapiens OX=9606 GN=TMEM245 PE=1 SV=3	Q9H330	TMEM245	97 kDa	0	0	#DIV/0!
Probable 18S rRNA (guanine-N(7))-methyltransferase OS=Homo sapiens OX=9606 GN=BUD23 PE=1 SV=2	O43709	BUD23	32 kDa	0	0	#DIV/0!
UDP-N-acetylglucosamine--peptide N-acetylglucosaminyltransferase 110 kDa subunit OS=Homo sapiens OX=9606 GN=OGT PE=1 SV=3	O15294 (+2)	OGT	117 kDa	0	0	#DIV/0!
Small ubiquitin-related modifier 2 OS=Homo sapiens OX=9606 GN=SUMO2 PE=1 SV=3	P61956 (+1)	SUMO2	11 kDa	0	0	#DIV/0!
Sulfate adenylyltransferase OS=Entamoeba histolytica OX=5759 GN=EHI_197160 PE=2 SV=1	C4LVD3	EHI_197160	48 kDa	0	0	#DIV/0!
DnaJ homolog subfamily C member 7 OS=Homo sapiens OX=9606 GN=DNAJC7 PE=1 SV=1	A0A6I8PIK4 (+7)	DNAJC7	52 kDa	0	0	#DIV/0!
Exosome complex component RRP46 OS=Homo sapiens OX=9606 GN=EXOSC5 PE=1 SV=1	Q9NQT4	EXOSC5	25 kDa	0	0	#DIV/0!
Dipeptidyl peptidase 1 OS=Homo sapiens OX=9606 GN=CTSC PE=4 SV=1	A0A7I2V2Q8 (+5)	CTSC	51 kDa	0	0	#DIV/0!
39S ribosomal protein L13, mitochondrial OS=Homo sapiens OX=9606 GN=MRPL13 PE=1 SV=1	Q9BYD1	MRPL13	21 kDa	0	0	#DIV/0!
BUB3-interacting and GLEBS motif-containing protein ZNF207 OS=Homo sapiens OX=9606 GN=ZNF207 PE=1 SV=1	J3QRS9 (+4)	ZNF207	53 kDa	0	0	#DIV/0!
Replication factor C subunit 1 OS=Homo sapiens OX=9606 GN=RFC1 PE=1 SV=4	P35251 (+1)	RFC1	128 kDa	0	0	#DIV/0!
ADP-ribosylation factor GTPase-activating protein 2 OS=Homo sapiens OX=9606 GN=ARFGAP2 PE=1 SV=2	G5E9L0 (+1)	ARFGAP2	53 kDa	0	0	#DIV/0!
DISP complex protein LRCH3 OS=Homo sapiens OX=9606 GN=LRCH3 PE=1 SV=1	E9PD99 (+4)	LRCH3	68 kDa	0	0	#DIV/0!
ATP-binding cassette sub-family F member 3 OS=Homo sapiens OX=9606 GN=ABCF3 PE=1 SV=2	Q9NUQ8 (+1)	ABCF3	80 kDa	0	0	#DIV/0!
Disrupted in schizophrenia 1 isoform 49 OS=Homo sapiens OX=9606 GN=TSNAX-DISC1 PE=2 SV=1	C4P0D6 (+3)	TSNAX-DISC1	21 kDa	0	0	#DIV/0!
Dolichyl-phosphate beta-glucosyltransferase OS=Homo sapiens OX=9606 GN=ALG5 PE=1 SV=1	Q9Y673 (+1)	ALG5	37 kDa	0	0	#DIV/0!
Glutathione S-transferase omega-1 OS=Homo sapiens OX=9606 GN=GSTO1 PE=1 SV=2	P78417 (+2)	GSTO1	28 kDa	0	0	#DIV/0!
Tubulin-folding cofactor B OS=Homo sapiens OX=9606 GN=TBCB PE=1 SV=1	A0A494C0X0 (+2)	TBCB	31 kDa	0	0	#DIV/0!
Chitinase domain-containing protein 1 OS=Homo sapiens OX=9606 GN=CHID1 PE=1 SV=1	Q9BWS9 (+2)	CHID1	45 kDa	0	0	#DIV/0!
Casein kinase I isoform delta OS=Homo sapiens OX=9606 GN=CSNK1D PE=1 SV=2	H7BYT1 (+2)	CSNK1D	49 kDa	0	0	#DIV/0!
IST1 homolog (Fragment) OS=Homo sapiens OX=9606 GN=IST1 PE=1 SV=1	H3BMU1 (+7)	IST1	23 kDa	0	0	#DIV/0!
Signal sequence receptor subunit gamma OS=Homo sapiens OX=9606 GN=SSR3 PE=1 SV=1	C9JA28 (+2)	SSR3	20 kDa	0	0	#DIV/0!
AP complex subunit sigma OS=Homo sapiens OX=9606 GN=AP2S1 PE=1 SV=1	M0QYZ2 (+2)	AP2S1	19 kDa	0	0	#DIV/0!
Succinate--CoA ligase [ADP-forming] subunit beta, mitochondrial OS=Homo sapiens OX=9606 GN=SUCLA2 PE=1 SV=1	A0A2R8YDQ9	SUCLA2	44 kDa	0	0	#DIV/0!
Cullin-2 OS=Homo sapiens OX=9606 GN=CUL2 PE=1 SV=1	A0A0A0MTN0 (+3)	CUL2	89 kDa	0	0	#DIV/0!
COP9 signalosome complex subunit 6 OS=Homo sapiens OX=9606 GN=COPS6 PE=1 SV=1	E7EM64 (+1)	COPS6	36 kDa	0	0	#DIV/0!
Phosphofurin acidic cluster sorting protein 1 OS=Homo sapiens OX=9606 GN=PACS1 PE=1 SV=2	Q6VY07 (+1)	PACS1	105 kDa	0	0	#DIV/0!
Adenosine kinase OS=Homo sapiens OX=9606 GN=ADK PE=1 SV=1	A0A5K1VW54 (+4)	ADK	39 kDa	0	0	#DIV/0!
START domain-containing protein 10 (Fragment) OS=Homo sapiens OX=9606 GN=STARD10 PE=1 SV=1	F5GWK5 (+7)	STARD10	9 kDa	0	0	#DIV/0!
Interferon-related developmental regulator 1 OS=Homo sapiens OX=9606 GN=IFRD1 PE=1 SV=4	O00458	IFRD1	50 kDa	0	0	#DIV/0!
NADP-dependent malic enzyme OS=Homo sapiens OX=9606 GN=ME1 PE=1 SV=1	P48163 (+1)	ME1	64 kDa	0	0	#DIV/0!
Cytochrome c oxidase subunit 6C OS=Homo sapiens OX=9606 GN=COX6C PE=1 SV=2	P09669	COX6C	9 kDa	0	0	#DIV/0!
40S ribosomal protein S10, putative OS=Entamoeba histolytica OX=5759 GN=EHI_197030 PE=4 SV=1	C4LVC0	EHI_197030	15 kDa	0	0	#DIV/0!
Diacylglycerol lipase-beta OS=Homo sapiens OX=9606 GN=DAGLB PE=1 SV=1	E7ET49 (+2)	DAGLB	69 kDa	0	0	#DIV/0!
Alpha-parvin (Fragment) OS=Homo sapiens OX=9606 GN=PARVA PE=1 SV=1	E9PS97 (+1)	PARVA	24 kDa	0	0	#DIV/0!
Oxysterol-binding protein 1 OS=Homo sapiens OX=9606 GN=OSBP PE=1 SV=1	P22059	OSBP	89 kDa	0	0	#DIV/0!
3-hydroxyisobutyryl-CoA hydrolase, mitochondrial OS=Homo sapiens OX=9606 GN=HIBCH PE=1 SV=2	Q6NVY1	HIBCH	43 kDa	0	0	#DIV/0!
Sterol-4-alpha-carboxylate 3-dehydrogenase, decarboxylating OS=Homo sapiens OX=9606 GN=NSDHL PE=1 SV=2	Q15738	NSDHL	42 kDa	0	0	#DIV/0!
Rab3 GTPase-activating protein non-catalytic subunit OS=Homo sapiens OX=9606 GN=RAB3GAP2 PE=1 SV=1	Q9H2M9	RAB3GAP2	156 kDa	0	0	#DIV/0!
Proteasome subunit beta type-2 OS=Homo sapiens OX=9606 GN=PSMB2 PE=1 SV=1	P49721	PSMB2	23 kDa	0	0	#DIV/0!
60S ribosomal protein L27a, putative OS=Entamoeba histolytica OX=5759 GN=EHI_069490 PE=2 SV=1	B1N3F8	EHI_069490	17 kDa	0	0	#DIV/0!
Glutathione synthetase OS=Homo sapiens OX=9606 GN=GSS PE=1 SV=1	A0A2R8Y430 (+1)	GSS	50 kDa	0	0	#DIV/0!
Phosphatidylinositol-3-phosphatase SAC1 OS=Homo sapiens OX=9606 GN=SACM1L PE=1 SV=1	A0A5F9ZHN7	SACM1L	69 kDa	0	0	#DIV/0!
Regulator of nonsense transcripts 3A OS=Homo sapiens OX=9606 GN=UPF3A PE=1 SV=1	Q9H1J1 (+1)	UPF3A	55 kDa	0	0	#DIV/0!
Dynactin subunit 1 OS=Homo sapiens OX=9606 GN=DCTN1 PE=1 SV=1	E7EX90 (+4)	DCTN1	139 kDa	0	0	#DIV/0!
Translocation protein SEC62 OS=Homo sapiens OX=9606 GN=SEC62 PE=1 SV=1	Q99442	SEC62	46 kDa	0	0	#DIV/0!
Protein-L-isoaspartate O-methyltransferase OS=Homo sapiens OX=9606 GN=PCMT1 PE=1 SV=1	A0A0A0MRJ6 (+4)	PCMT1	30 kDa	0	0	#DIV/0!
CAAX prenyl protease 1 homolog OS=Homo sapiens OX=9606 GN=ZMPSTE24 PE=1 SV=2	O75844	ZMPSTE24	55 kDa	0	0	#DIV/0!
Transcription elongation factor SPT5 OS=Homo sapiens OX=9606 GN=SUPT5H PE=1 SV=1	O00267 (+1)	SUPT5H	121 kDa	0	0	#DIV/0!
CD320 antigen (Fragment) OS=Homo sapiens OX=9606 GN=CD320 PE=1 SV=1	M0R100	CD320	9 kDa	0	0	#DIV/0!
tRNA (adenine(58)-N(1))-methyltransferase (Fragment) OS=Homo sapiens OX=9606 GN=TRMT61A PE=1 SV=1	H0Y2Q1 (+1)	TRMT61A	21 kDa	0	0	#DIV/0!
Cell division cycle protein 123 homolog OS=Homo sapiens OX=9606 GN=CDC123 PE=1 SV=1	O75794	CDC123	39 kDa	0	0	#DIV/0!
Transmembrane protein 205 (Fragment) OS=Homo sapiens OX=9606 GN=TMEM205 PE=1 SV=1	K7ELQ9 (+1)	TMEM205	19 kDa	0	0	#DIV/0!
Aldehyde-alcohol dehydrogenase 2, putative OS=Entamoeba histolytica OX=5759 GN=EHI_024240 PE=4 SV=1	B1N387 (+2)	EHI_024240	91 kDa	0	0	#DIV/0!
Cleft lip and palate transmembrane protein 1 OS=Homo sapiens OX=9606 GN=CLPTM1 PE=1 SV=1	O96005 (+1)	CLPTM1	76 kDa	0	0	#DIV/0!
MAP7 domain-containing protein 1 OS=Homo sapiens OX=9606 GN=MAP7D1 PE=1 SV=1	Q3KQU3 (+2)	MAP7D1	93 kDa	0	0	#DIV/0!
Squalene synthase OS=Homo sapiens OX=9606 GN=FDFT1 PE=1 SV=1	E9PNM1	FDFT1	47 kDa	0	0	#DIV/0!
Ubiquitin-associated domain-containing protein 2 OS=Homo sapiens OX=9606 GN=UBAC2 PE=1 SV=1	Q8NBM4	UBAC2	39 kDa	0	0	#DIV/0!
Serine hydroxymethyltransferase, cytosolic OS=Homo sapiens OX=9606 GN=SHMT1 PE=1 SV=1	P34896 (+1)	SHMT1	53 kDa	0	0	#DIV/0!
Pyruvate:ferredoxin oxidoreductase OS=Entamoeba histolytica OX=5759 GN=EHI_051060 PE=4 SV=1	C4LTX6	EHI_051060	128 kDa	0	0	#DIV/0!
DNA repair protein XRCC1 OS=Homo sapiens OX=9606 GN=XRCC1 PE=1 SV=2	F5H8D7 (+1)	XRCC1	66 kDa	0	0	#DIV/0!
Beta-galactosidase OS=Homo sapiens OX=9606 GN=GLB1 PE=1 SV=2	P16278 (+1)	GLB1	76 kDa	0	0	#DIV/0!
Splicing factor 3B subunit 6 OS=Homo sapiens OX=9606 GN=SF3B6 PE=1 SV=1	Q9Y3B4	SF3B6	15 kDa	0	0	#DIV/0!
Cytochrome c oxidase subunit 7A2, mitochondrial (Fragment) OS=Homo sapiens OX=9606 GN=COX7A2 PE=1 SV=1	D6RGV5 (+3)	COX7A2	12 kDa	0	0	#DIV/0!
Fibrinogen gamma chain OS=Homo sapiens OX=9606 GN=FGG PE=1 SV=1	C9JC84 (+5)	FGG	52 kDa	0	0	#DIV/0!
Proteasome subunit beta type-4 OS=Homo sapiens OX=9606 GN=PSMB4 PE=1 SV=4	P28070	PSMB4	29 kDa	0	0	#DIV/0!
Oxidoreductase HTATIP2 OS=Homo sapiens OX=9606 GN=HTATIP2 PE=1 SV=1	E9PI87 (+2)	HTATIP2	22 kDa	0	0	#DIV/0!
GPI transamidase component PIG-S OS=Homo sapiens OX=9606 GN=PIGS PE=1 SV=3	Q96S52 (+1)	PIGS	62 kDa	0	0	#DIV/0!
cAMP-dependent protein kinase type I-alpha regulatory subunit (Fragment) OS=Homo sapiens OX=9606 GN=PRKAR1A PE=1 SV=1	K7EM13 (+2)	PRKAR1A	17 kDa	0	0	#DIV/0!
Chromatin-remodeling ATPase INO80 OS=Homo sapiens OX=9606 GN=INO80 PE=1 SV=2	Q9ULG1	INO80	177 kDa	0	0	#DIV/0!
Puromycin-sensitive aminopeptidase OS=Homo sapiens OX=9606 GN=NPEPPS PE=4 SV=1	A0A7I2V389 (+4)	NPEPPS	100 kDa	0	0	#DIV/0!
Serine/threonine-protein kinase Nek2 OS=Homo sapiens OX=9606 GN=NEK2 PE=1 SV=1	F6U4U2 (+4)	NEK2	45 kDa	0	0	#DIV/0!
NADH dehydrogenase [ubiquinone] 1 alpha subcomplex subunit 13 OS=Homo sapiens OX=9606 GN=NDUFA13 PE=1 SV=3	Q9P0J0 (+1)	NDUFA13	17 kDa	0	0	#DIV/0!
U6 snRNA-associated Sm-like protein LSm2 OS=Homo sapiens OX=9606 GN=LSM2 PE=1 SV=1	Q9Y333	LSM2	11 kDa	0	0	#DIV/0!
D-aminoacyl-tRNA deacylase 1 OS=Homo sapiens OX=9606 GN=DTD1 PE=1 SV=2	Q8TEA8	DTD1	23 kDa	0	0	#DIV/0!
Splicing factor 45 (Fragment) OS=Homo sapiens OX=9606 GN=RBM17 PE=1 SV=1	Q5W010 (+2)	RBM17	25 kDa	0	0	#DIV/0!
ATPase GET3 OS=Homo sapiens OX=9606 GN=GET3 PE=1 SV=2	O43681	GET3	39 kDa	0	0	#DIV/0!
Probable cytosolic iron-sulfur protein assembly protein CIAO1 OS=Homo sapiens OX=9606 GN=CIAO1 PE=1 SV=1	O76071	CIAO1	38 kDa	0	0	#DIV/0!
Tripartite motif-containing protein 2 OS=Homo sapiens OX=9606 GN=TRIM2 PE=1 SV=1	A0A6Q8PEY7 (+21)	TRIM2	85 kDa	0	0	#DIV/0!
eEF1A lysine and N-terminal methyltransferase OS=Homo sapiens OX=9606 GN=EEF1AKNMT PE=1 SV=1	Q8N6R0 (+2)	EEF1AKNMT	79 kDa	0	0	#DIV/0!
Chromodomain-helicase-DNA-binding protein 1 OS=Homo sapiens OX=9606 GN=CHD1 PE=1 SV=2	O14646 (+1)	CHD1	197 kDa	0	0	#DIV/0!
Basal cell adhesion molecule OS=Homo sapiens OX=9606 GN=BCAM PE=1 SV=1	A0A087WXM8 (+1)	BCAM	64 kDa	0	0	#DIV/0!
AP-1 complex subunit mu-2 OS=Homo sapiens OX=9606 GN=AP1M2 PE=1 SV=4	Q9Y6Q5	AP1M2	48 kDa	0	0	#DIV/0!
Cellular retinoic acid-binding protein 1 OS=Homo sapiens OX=9606 GN=CRABP1 PE=1 SV=2	P29762	CRABP1	16 kDa	0	0	#DIV/0!
Ras suppressor protein 1 OS=Homo sapiens OX=9606 GN=RSU1 PE=1 SV=3	Q15404	RSU1	32 kDa	0	0	#DIV/0!
Histone deacetylase 6 OS=Homo sapiens OX=9606 GN=HDAC6 PE=1 SV=1	A0A2R8YDE6 (+1)	HDAC6	125 kDa	0	0	#DIV/0!
Kanadaptin OS=Homo sapiens OX=9606 GN=SLC4A1AP PE=1 SV=1	A0A087X0M4 (+1)	SLC4A1AP	83 kDa	0	0	#DIV/0!
COP9 signalosome complex subunit 1 OS=Homo sapiens OX=9606 GN=GPS1 PE=1 SV=1	A0A096LP07 (+6)	GPS1	55 kDa	0	0	#DIV/0!
Dynein heavy chain 5, axonemal OS=Homo sapiens OX=9606 GN=DNAH5 PE=1 SV=3	Q8TE73	DNAH5	529 kDa	0	0	#DIV/0!
Serine palmitoyltransferase 1 OS=Homo sapiens OX=9606 GN=SPTLC1 PE=1 SV=1	O15269	SPTLC1	53 kDa	0	0	#DIV/0!
Collagen alpha-2(I) chain OS=Homo sapiens OX=9606 GN=COL1A2 PE=1 SV=1	A0A087WTA8 (+1)	COL1A2	129 kDa	0	0	#DIV/0!
Nuclear factor-related to kappa-B-binding protein (Fragment) OS=Homo sapiens OX=9606 GN=NFRKB PE=1 SV=1	E9PQ59 (+3)	NFRKB	108 kDa	0	0	#DIV/0!
Histone deacetylase 1 OS=Homo sapiens OX=9606 GN=HDAC1 PE=1 SV=1	Q13547 (+1)	HDAC1	55 kDa	0	0	#DIV/0!
Flavin reductase (NADPH) OS=Homo sapiens OX=9606 GN=BLVRB PE=1 SV=3	P30043	BLVRB	22 kDa	0	0	#DIV/0!
Retinol dehydrogenase 11 OS=Homo sapiens OX=9606 GN=RDH11 PE=1 SV=2	Q8TC12	RDH11	35 kDa	0	0	#DIV/0!
UBX domain-containing protein 4 OS=Homo sapiens OX=9606 GN=UBXN4 PE=1 SV=2	Q92575	UBXN4	57 kDa	0	0	#DIV/0!
Tensin-3 (Fragment) OS=Homo sapiens OX=9606 GN=TNS3 PE=1 SV=8	E9PCX8 (+2)	TNS3	134 kDa	0	0	#DIV/0!
Protein quaking (Fragment) OS=Homo sapiens OX=9606 GN=QKI PE=1 SV=1	F5GXS8 (+7)	QKI	18 kDa	0	0	#DIV/0!
ADP-ribosylation factor GTPase-activating protein 3 OS=Homo sapiens OX=9606 GN=ARFGAP3 PE=1 SV=1	Q9NP61 (+1)	ARFGAP3	57 kDa	0	0	#DIV/0!
Sorbitol dehydrogenase OS=Homo sapiens OX=9606 GN=SORD PE=1 SV=4	Q00796	SORD	38 kDa	0	0	#DIV/0!
Isoform 2 of Extracellular matrix protein 1 OS=Homo sapiens OX=9606 GN=ECM1	Q16610-2	ECM1	46 kDa	0	0	#DIV/0!
Integrin beta-1 OS=Homo sapiens OX=9606 GN=ITGB1 PE=4 SV=1	A0A7I2V2F9 (+9)	ITGB1	88 kDa	0	0	#DIV/0!
Semenogelin-1 OS=Homo sapiens OX=9606 GN=SEMG1 PE=1 SV=2	P04279 (+1)	SEMG1	52 kDa	0	0	#DIV/0!
Succinate-semialdehyde dehydrogenase, mitochondrial (Fragment) OS=Homo sapiens OX=9606 GN=ALDH5A1 PE=1 SV=1	A0A5F9ZH98 (+3)	ALDH5A1	24 kDa	0	0	#DIV/0!
F-box-like/WD repeat-containing protein TBL1XR1 OS=Homo sapiens OX=9606 GN=TBL1XR1 PE=1 SV=1	A0A0D9SF63 (+2)	TBL1XR1	52 kDa	0	0	#DIV/0!
Ceramide synthase 2 (Fragment) OS=Homo sapiens OX=9606 GN=CERS2 PE=1 SV=8	H0YKH6 (+4)	CERS2	27 kDa	0	0	#DIV/0!
Translation machinery-associated protein 16 (Fragment) OS=Homo sapiens OX=9606 GN=TMA16 PE=1 SV=1	H0Y9X1 (+1)	TMA16	28 kDa	0	0	#DIV/0!
HCG2043421, isoform CRA_c OS=Homo sapiens OX=9606 GN=RBPMS PE=1 SV=1	B4E3T4 (+5)	RBPMS	25 kDa	0	0	#DIV/0!
SEC23-interacting protein OS=Homo sapiens OX=9606 GN=SEC23IP PE=1 SV=1	Q9Y6Y8 (+1)	SEC23IP	111 kDa	0	0	#DIV/0!
RNA helicase OS=Homo sapiens OX=9606 GN=DDX10 PE=1 SV=1	A0A3B3ISR7	DDX10	78 kDa	0	0	#DIV/0!
6-O-methylguanine-DNA methyltransferase OS=Homo sapiens OX=9606 GN=MGMT PE=1 SV=1	B4DEE8	MGMT	25 kDa	0	0	#DIV/0!
Isoform 3 of Cysteine--tRNA ligase, cytoplasmic OS=Homo sapiens OX=9606 GN=CARS1	P49589-3	CARS1	95 kDa	0	0	#DIV/0!
Ceramide transfer protein OS=Homo sapiens OX=9606 GN=CERT1 PE=1 SV=1	A0A2R8Y7C5 (+7)	CERT1	69 kDa	0	0	#DIV/0!
BRISC and BRCA1-A complex member 1 (Fragment) OS=Homo sapiens OX=9606 GN=BABAM1 PE=1 SV=1	M0R2I2	BABAM1	26 kDa	0	0	#DIV/0!
Arf-GAP with SH3 domain, ANK repeat and PH domain-containing protein 2 (Fragment) OS=Homo sapiens OX=9606 GN=ASAP2 PE=1 SV=1	A0A286YFG8 (+2)	ASAP2	36 kDa	0	0	#DIV/0!
Perilipin-3 OS=Homo sapiens OX=9606 GN=PLIN3 PE=1 SV=3	O60664 (+1)	PLIN3	47 kDa	0	0	#DIV/0!
Zinc finger CCCH-type with G patch domain-containing protein OS=Homo sapiens OX=9606 GN=ZGPAT PE=1 SV=3	Q8N5A5 (+4)	ZGPAT	57 kDa	0	0	#DIV/0!
Protein flightless-1 homolog OS=Homo sapiens OX=9606 GN=FLII PE=1 SV=2	Q13045 (+2)	FLII	145 kDa	0	0	#DIV/0!
N-acetylated-alpha-linked acidic dipeptidase 2 OS=Homo sapiens OX=9606 GN=NAALAD2 PE=1 SV=1	J3KNJ3 (+1)	NAALAD2	80 kDa	0	0	#DIV/0!
Aminoacyl-tRNA hydrolase OS=Homo sapiens OX=9606 GN=PTRH2 PE=1 SV=1	J3KQ48 (+1)	PTRH2	19 kDa	0	0	#DIV/0!
Glucosamine-6-phosphate isomerase 1 OS=Homo sapiens OX=9606 GN=GNPDA1 PE=1 SV=1	P46926 (+1)	GNPDA1	33 kDa	0	0	#DIV/0!
Enhancer binding protein-1 OS=Entamoeba histolytica OX=5759 GN=EHI_121780 PE=4 SV=1	C4M5C4	EHI_121780	35 kDa	0	0	#DIV/0!
Anaphase-promoting complex subunit 1 OS=Homo sapiens OX=9606 GN=ANAPC1 PE=1 SV=1	Q9H1A4	ANAPC1	217 kDa	0	0	#DIV/0!
Proteasome activator complex subunit 1 OS=Homo sapiens OX=9606 GN=PSME1 PE=1 SV=1	Q06323 (+2)	PSME1	29 kDa	0	0	#DIV/0!
DCN1-like protein (Fragment) OS=Homo sapiens OX=9606 GN=DCUN1D5 PE=1 SV=1	H0YCN4 (+1)	DCUN1D5	23 kDa	0	0	#DIV/0!
DNA topoisomerase (Fragment) OS=Homo sapiens OX=9606 GN=TOP3B PE=1 SV=1	H0Y6W0 (+3)	TOP3B	59 kDa	0	0	#DIV/0!
Laminin subunit alpha-2 OS=Homo sapiens OX=9606 GN=LAMA2 PE=1 SV=1	A0A087WX80 (+2)	LAMA2	344 kDa	0	0	#DIV/0!
Tripeptidyl-peptidase 2 (Fragment) OS=Homo sapiens OX=9606 GN=TPP2 PE=1 SV=1	A0A494C0U1 (+3)	TPP2	130 kDa	0	0	#DIV/0!
Paraoxonase 2, isoform CRA_a OS=Homo sapiens OX=9606 GN=PON2 PE=1 SV=1	A0A0J9YXF2 (+3)	PON2	42 kDa	0	0	#DIV/0!
Large neutral amino acids transporter small subunit 1 OS=Homo sapiens OX=9606 GN=SLC7A5 PE=1 SV=2	Q01650	SLC7A5	55 kDa	0	0	#DIV/0!
Hemoglobin subunit alpha OS=Homo sapiens OX=9606 GN=HBA1 PE=1 SV=2	P69905	HBA1	15 kDa	0	0	#DIV/0!
Cyclin-dependent kinase 12 (Fragment) OS=Homo sapiens OX=9606 GN=CDK12 PE=1 SV=1	J3QSD7 (+3)	CDK12	134 kDa	0	0	#DIV/0!
Ras-related protein R-Ras2 (Fragment) OS=Homo sapiens OX=9606 GN=RRAS2 PE=1 SV=1	E9PK85 (+3)	RRAS2	20 kDa	0	0	#DIV/0!
Splicing factor 3B subunit 3, putative OS=Entamoeba histolytica OX=5759 GN=EHI_144720 PE=4 SV=1	C4MA02	EHI_144720	129 kDa	0	0	#DIV/0!
SR-related and CTD-associated factor 4 OS=Homo sapiens OX=9606 GN=SCAF4 PE=1 SV=3	O95104 (+2)	SCAF4	126 kDa	0	0	#DIV/0!
CCN family member 1 OS=Homo sapiens OX=9606 GN=CCN1 PE=1 SV=1	O00622	CCN1	42 kDa	0	0	#DIV/0!
Tripartite motif-containing protein 26 (Fragment) OS=Homo sapiens OX=9606 GN=TRIM26 PE=1 SV=1	A2AE48 (+1)	TRIM26	29 kDa	0	0	#DIV/0!
RISC-loading complex subunit TARBP2 OS=Homo sapiens OX=9606 GN=TARBP2 PE=1 SV=3	Q15633 (+1)	TARBP2	39 kDa	0	0	#DIV/0!
Selenocysteine-specific elongation factor OS=Homo sapiens OX=9606 GN=EEFSEC PE=1 SV=1	C9J8T0 (+1)	EEFSEC	48 kDa	0	0	#DIV/0!
26S proteasome non-ATPase regulatory subunit 5 OS=Homo sapiens OX=9606 GN=PSMD5 PE=1 SV=3	Q16401 (+1)	PSMD5	56 kDa	0	0	#DIV/0!
Lipocalin-1 OS=Homo sapiens OX=9606 GN=LCN1 PE=1 SV=1	P31025	LCN1	19 kDa	0	0	#DIV/0!
DAZ-associated protein 1 OS=Homo sapiens OX=9606 GN=DAZAP1 PE=1 SV=2	K7EK33 (+4)	DAZAP1	43 kDa	0	0	#DIV/0!
ATP synthase subunit e, mitochondrial OS=Homo sapiens OX=9606 GN=ATP5ME PE=1 SV=2	P56385	ATP5ME	8 kDa	0	0	#DIV/0!
Golgi phosphoprotein 3 OS=Homo sapiens OX=9606 GN=GOLPH3 PE=1 SV=1	Q9H4A6	GOLPH3	34 kDa	0	0	#DIV/0!
Non-specific serine/threonine protein kinase OS=Homo sapiens OX=9606 GN=PAK1 PE=1 SV=1	B3KNX7 (+2)	PAK1	58 kDa	0	0	#DIV/0!
7SK snRNA methylphosphate capping enzyme OS=Homo sapiens OX=9606 GN=MEPCE PE=1 SV=1	Q7L2J0	MEPCE	74 kDa	0	0	#DIV/0!
Ribosome biogenesis protein BRX1 homolog OS=Homo sapiens OX=9606 GN=BRIX1 PE=1 SV=2	Q8TDN6	BRIX1	41 kDa	0	0	#DIV/0!
60S ribosomal protein L31, putative OS=Entamoeba histolytica OX=5759 GN=EHI_068200 PE=2 SV=1	C4LU13	EHI_068200	17 kDa	0	0	#DIV/0!
Carboxypeptidase D OS=Homo sapiens OX=9606 GN=CPD PE=1 SV=2	O75976	CPD	153 kDa	0	0	#DIV/0!
Kinesin-like protein KIF3B OS=Homo sapiens OX=9606 GN=KIF3B PE=1 SV=1	O15066	KIF3B	85 kDa	0	0	#DIV/0!
Cell adhesion molecule 1 OS=Homo sapiens OX=9606 GN=CADM1 PE=1 SV=1	A0A087X0T8 (+7)	CADM1	39 kDa	0	0	#DIV/0!
Echinoderm microtubule associated protein like 3, isoform CRA_e OS=Homo sapiens OX=9606 GN=EML3 PE=1 SV=1	B7WPE2 (+4)	EML3	95 kDa	0	0	#DIV/0!
Inhibitor of Bruton tyrosine kinase OS=Homo sapiens OX=9606 GN=IBTK PE=1 SV=1	E7EPI0 (+2)	IBTK	149 kDa	0	0	#DIV/0!
Nucleolar protein 58 OS=Homo sapiens OX=9606 GN=NOP58 PE=1 SV=1	Q9Y2X3	NOP58	60 kDa	0	0	#DIV/0!
Striatin OS=Homo sapiens OX=9606 GN=STRN PE=1 SV=4	O43815 (+1)	STRN	86 kDa	0	0	#DIV/0!
Peroxisomal bifunctional enzyme OS=Homo sapiens OX=9606 GN=EHHADH PE=1 SV=3	Q08426	EHHADH	79 kDa	0	0	#DIV/0!
Galactokinase OS=Homo sapiens OX=9606 GN=GALK1 PE=1 SV=1	P51570	GALK1	42 kDa	0	0	#DIV/0!
Coatomer subunit epsilon OS=Homo sapiens OX=9606 GN=COPE PE=1 SV=1	M0QXB4 (+2)	COPE	37 kDa	0	0	#DIV/0!
CLIP-associating protein 2 OS=Homo sapiens OX=9606 GN=CLASP2 PE=1 SV=2	E3W994 (+3)	CLASP2	139 kDa	0	0	#DIV/0!
Centromere/kinetochore protein zw10 homolog OS=Homo sapiens OX=9606 GN=ZW10 PE=1 SV=3	O43264 (+1)	ZW10	89 kDa	0	0	#DIV/0!
SAP30-binding protein (Fragment) OS=Homo sapiens OX=9606 GN=SAP30BP PE=1 SV=1	J3QQJ0	SAP30BP	36 kDa	0	0	#DIV/0!
Nucleolar protein 9 OS=Homo sapiens OX=9606 GN=NOP9 PE=1 SV=1	Q86U38	NOP9	69 kDa	0	0	#DIV/0!
Tripeptidyl aminopeptidase OS=Homo sapiens OX=9606 GN=TPP1 PE=1 SV=1	A0A2R8YGD1 (+2)	TPP1	51 kDa	0	0	#DIV/0!
NADH dehydrogenase [ubiquinone] 1 alpha subcomplex subunit 8 OS=Homo sapiens OX=9606 GN=NDUFA8 PE=1 SV=3	P51970	NDUFA8	20 kDa	0	0	#DIV/0!
Lysophospholipid acyltransferase 5 OS=Homo sapiens OX=9606 GN=LPCAT3 PE=1 SV=1	F5H0M4 (+2)	LPCAT3	39 kDa	0	0	#DIV/0!
Rho-associated protein kinase 2 OS=Homo sapiens OX=9606 GN=ROCK2 PE=1 SV=4	O75116	ROCK2	161 kDa	0	0	#DIV/0!
Protein phosphatase methylesterase 1 OS=Homo sapiens OX=9606 GN=PPME1 PE=1 SV=3	Q9Y570 (+1)	PPME1	42 kDa	0	0	#DIV/0!
GA binding protein transcription factor beta subunit 1 transcript variant gamma-2 OS=Homo sapiens OX=9606 GN=GABPB1 PE=1 SV=1	H9ZYI9 (+2)	GABPB1	37 kDa	0	0	#DIV/0!
DNA polymerase delta subunit 2 OS=Homo sapiens OX=9606 GN=POLD2 PE=1 SV=1	A0A087WWF6	POLD2	55 kDa	0	0	#DIV/0!
Vacuolar protein sorting-associated protein 18 homolog OS=Homo sapiens OX=9606 GN=VPS18 PE=1 SV=2	Q9P253	VPS18	110 kDa	0	0	#DIV/0!
Ribosome biogenesis protein BMS1 homolog OS=Homo sapiens OX=9606 GN=BMS1 PE=1 SV=1	Q14692	BMS1	146 kDa	0	0	#DIV/0!
Non-specific serine/threonine protein kinase (Fragment) OS=Homo sapiens OX=9606 GN=EIF2AK4 PE=1 SV=1	H0YME5 (+2)	EIF2AK4	161 kDa	0	0	#DIV/0!
Lanosterol 14-alpha demethylase OS=Homo sapiens OX=9606 GN=CYP51A1 PE=1 SV=1	A0A0C4DFL7 (+2)	CYP51A1	57 kDa	0	0	#DIV/0!
Gamma-tubulin complex component 2 OS=Homo sapiens OX=9606 GN=TUBGCP2 PE=1 SV=2	Q9BSJ2 (+1)	TUBGCP2	103 kDa	0	0	#DIV/0!
DNA-directed RNA polymerase II subunit E OS=Homo sapiens OX=9606 GN=POLR2E PE=1 SV=1	A0A087WVZ9 (+2)	POLR2E	21 kDa	0	0	#DIV/0!
Hexosaminidase D OS=Homo sapiens OX=9606 GN=HEXD PE=1 SV=3	Q8WVB3	HEXD	54 kDa	0	0	#DIV/0!
Adenine phosphoribosyltransferase (Fragment) OS=Homo sapiens OX=9606 GN=APRT PE=1 SV=1	H3BQB1 (+3)	APRT	18 kDa	0	0	#DIV/0!
Exo-alpha-sialidase OS=Homo sapiens OX=9606 GN=NEU1 PE=1 SV=1	E9PIF4 (+1)	NEU1	29 kDa	0	0	#DIV/0!
Isoform 2 of Vasculin OS=Homo sapiens OX=9606 GN=GPBP1	Q86WP2-2 (+1)	GPBP1	54 kDa	0	0	#DIV/0!
Lactotransferrin (Fragment) OS=Homo sapiens OX=9606 GN=LTF PE=1 SV=1	E7EQB2 (+3)	LTF	77 kDa	0	0	#DIV/0!
Aspartyl-tRNA synthetase OS=Entamoeba histolytica OX=5759 GN=EHI_175050 PE=1 SV=1	C4LZN0	EHI_175050	63 kDa	0	0	#DIV/0!
Serine/threonine-protein kinase TAO2 OS=Homo sapiens OX=9606 GN=TAOK2 PE=1 SV=2	Q9UL54 (+1)	TAOK2	138 kDa	0	0	#DIV/0!
Fructosamine-3-kinase OS=Homo sapiens OX=9606 GN=FN3K PE=1 SV=1	Q9H479	FN3K	35 kDa	0	0	#DIV/0!
Glutamine synthetase OS=Homo sapiens OX=9606 GN=GLUL PE=1 SV=4	P15104	GLUL	42 kDa	0	0	#DIV/0!
Protein mono-ADP-ribosyltransferase PARP4 OS=Homo sapiens OX=9606 GN=PARP4 PE=1 SV=3	Q9UKK3	PARP4	193 kDa	0	0	#DIV/0!
Apolipoprotein D (Fragment) OS=Homo sapiens OX=9606 GN=APOD PE=1 SV=1	C9JF17 (+1)	APOD	24 kDa	0	0	#DIV/0!
Ganglioside GM2 activator (Fragment) OS=Homo sapiens OX=9606 GN=GM2A PE=1 SV=1	E5RJD0 (+2)	GM2A	16 kDa	0	0	#DIV/0!
GDP-fucose protein O-fucosyltransferase 1 OS=Homo sapiens OX=9606 GN=POFUT1 PE=1 SV=1	Q9H488	POFUT1	44 kDa	0	0	#DIV/0!
Dehydrogenase/reductase SDR family member 7 (Fragment) OS=Homo sapiens OX=9606 GN=DHRS7 PE=1 SV=1	H0YJ66 (+2)	DHRS7	45 kDa	0	0	#DIV/0!
Cullin-5 OS=Homo sapiens OX=9606 GN=CUL5 PE=1 SV=4	Q93034	CUL5	91 kDa	0	0	#DIV/0!
RNA demethylase ALKBH5 OS=Homo sapiens OX=9606 GN=ALKBH5 PE=1 SV=2	Q6P6C2 (+2)	ALKBH5	44 kDa	0	0	#DIV/0!
Transmembrane emp24 domain-containing protein 1 OS=Homo sapiens OX=9606 GN=TMED1 PE=1 SV=1	K7EIN4 (+2)	TMED1	10 kDa	0	0	#DIV/0!
SWI/SNF complex subunit SMARCC2 OS=Homo sapiens OX=9606 GN=SMARCC2 PE=1 SV=1	F8VXC8 (+2)	SMARCC2	136 kDa	0	0	#DIV/0!
Translocating chain-associated membrane protein 2 OS=Homo sapiens OX=9606 GN=TRAM2 PE=1 SV=1	Q15035	TRAM2	43 kDa	0	0	#DIV/0!
Alpha/beta hydrolase domain-containing protein 16A OS=Homo sapiens OX=9606 GN=ABHD16A PE=1 SV=1	A0A0G2JJD3 (+2)	ABHD16A	68 kDa	0	0	#DIV/0!
Protein ERGIC-53 OS=Homo sapiens OX=9606 GN=LMAN1 PE=1 SV=2	P49257	LMAN1	58 kDa	0	0	#DIV/0!
Vacuolar protein sorting-associated protein 51 homolog OS=Homo sapiens OX=9606 GN=VPS51 PE=1 SV=2	Q9UID3 (+1)	VPS51	86 kDa	0	0	#DIV/0!
Surfeit locus protein 4 OS=Homo sapiens OX=9606 GN=SURF4 PE=1 SV=1	B7Z1G8 (+3)	SURF4	25 kDa	0	0	#DIV/0!
Lysocardiolipin acyltransferase 1 OS=Homo sapiens OX=9606 GN=LCLAT1 PE=1 SV=1	Q6UWP7 (+1)	LCLAT1	49 kDa	0	0	#DIV/0!
E3 ubiquitin-protein ligase CHIP (Fragment) OS=Homo sapiens OX=9606 GN=STUB1 PE=1 SV=1	H3BTA3	STUB1	18 kDa	0	0	#DIV/0!
Glial fibrillary acidic protein (Fragment) OS=Homo sapiens OX=9606 GN=GFAP PE=1 SV=2	K7EPT8	GFAP	8 kDa	0	0	#DIV/0!
Uncharacterized protein OS=Entamoeba histolytica OX=5759 GN=EHI_036870 PE=4 SV=1	C4M9V4	EHI_036870	53 kDa	0	0	#DIV/0!
Rho-GAP domain-containing protein OS=Entamoeba histolytica OX=5759 GN=EHI_068530 PE=4 SV=1	C4LU44	EHI_068530	101 kDa	0	0	#DIV/0!
Pre-mRNA 3'-end-processing factor FIP1 OS=Homo sapiens OX=9606 GN=FIP1L1 PE=1 SV=1	Q6UN15 (+2)	FIP1L1	67 kDa	0	0	#DIV/0!
Receptor expression-enhancing protein 4 OS=Homo sapiens OX=9606 GN=REEP4 PE=1 SV=1	Q9H6H4	REEP4	29 kDa	0	0	#DIV/0!
Glypican-3 (Fragment) OS=Homo sapiens OX=9606 GN=GPC3 PE=1 SV=1	H0Y3U6 (+2)	GPC3	29 kDa	0	0	#DIV/0!
Alpha-2-macroglobulin receptor-associated protein OS=Homo sapiens OX=9606 GN=LRPAP1 PE=1 SV=1	P30533	LRPAP1	41 kDa	0	0	#DIV/0!
Transmembrane 9 superfamily member 2 OS=Homo sapiens OX=9606 GN=TM9SF2 PE=1 SV=1	Q99805	TM9SF2	76 kDa	0	0	#DIV/0!
pre-mRNA 3' end processing protein WDR33 OS=Homo sapiens OX=9606 GN=WDR33 PE=1 SV=2	Q9C0J8	WDR33	146 kDa	0	0	#DIV/0!
Protein VAC14 homolog OS=Homo sapiens OX=9606 GN=VAC14 PE=1 SV=1	Q08AM6	VAC14	88 kDa	0	0	#DIV/0!
Vitamin K-dependent gamma-carboxylase OS=Homo sapiens OX=9606 GN=GGCX PE=1 SV=2	P38435 (+1)	GGCX	88 kDa	0	0	#DIV/0!
Palmitoyl-protein hydrolase 1 OS=Homo sapiens OX=9606 GN=PPT1 PE=1 SV=1	A0A286YFF7 (+3)	PPT1	37 kDa	0	0	#DIV/0!
Lysophosphatidylcholine acyltransferase 1 OS=Homo sapiens OX=9606 GN=LPCAT1 PE=1 SV=2	Q8NF37	LPCAT1	59 kDa	0	0	#DIV/0!
Zinc finger Ran-binding domain-containing protein 2 OS=Homo sapiens OX=9606 GN=ZRANB2 PE=1 SV=2	O95218 (+1)	ZRANB2	37 kDa	0	0	#DIV/0!
Cullin-4A OS=Homo sapiens OX=9606 GN=CUL4A PE=1 SV=3	Q13619	CUL4A	88 kDa	0	0	#DIV/0!
Pre-mRNA-splicing factor ATP-dependent RNA helicase DHX16 (Fragment) OS=Homo sapiens OX=9606 GN=DHX16 PE=1 SV=1	A0A140T947 (+1)	DHX16	77 kDa	0	0	#DIV/0!
Proteasomal ATPase-associated factor 1 OS=Homo sapiens OX=9606 GN=PAAF1 PE=1 SV=1	F5H0C4 (+3)	PAAF1	43 kDa	0	0	#DIV/0!
Flavoprotein subunit of complex II OS=Homo sapiens OX=9606 GN=SDHA PE=1 SV=1	A0A087X1I3 (+3)	SDHA	57 kDa	0	0	#DIV/0!
Peptidyl-prolyl cis-trans isomerase-like 4 OS=Homo sapiens OX=9606 GN=PPIL4 PE=1 SV=1	Q8WUA2	PPIL4	57 kDa	0	0	#DIV/0!
Ubiquitin carboxyl-terminal hydrolase OS=Homo sapiens OX=9606 GN=UCHL5 PE=1 SV=1	Q5LJA5 (+6)	UCHL5	40 kDa	0	0	#DIV/0!
Golgi reassembly-stacking protein 2 OS=Homo sapiens OX=9606 GN=GORASP2 PE=1 SV=3	Q9H8Y8 (+2)	GORASP2	47 kDa	0	0	#DIV/0!
Elongation of very long chain fatty acids protein 1 OS=Homo sapiens OX=9606 GN=ELOVL1 PE=1 SV=1	Q9BW60	ELOVL1	33 kDa	0	0	#DIV/0!
ER membrane protein complex subunit 8 OS=Homo sapiens OX=9606 GN=EMC8 PE=1 SV=1	O43402	EMC8	24 kDa	0	0	#DIV/0!
Prolyl 3-hydroxylase 2 (Fragment) OS=Homo sapiens OX=9606 GN=P3H2 PE=1 SV=1	C9J313 (+3)	P3H2	16 kDa	0	0	#DIV/0!
TRMT1-like protein OS=Homo sapiens OX=9606 GN=TRMT1L PE=1 SV=2	Q7Z2T5	TRMT1L	82 kDa	0	0	#DIV/0!
RNA N6-adenosine-methyltransferase METTL16 OS=Homo sapiens OX=9606 GN=METTL16 PE=1 SV=2	Q86W50	METTL16	64 kDa	0	0	#DIV/0!
Glycogen debranching enzyme OS=Homo sapiens OX=9606 GN=AGL PE=1 SV=3	P35573 (+2)	AGL	175 kDa	0	0	#DIV/0!
COP9 signalosome complex subunit 4 OS=Homo sapiens OX=9606 GN=COPS4 PE=1 SV=1	D6RAX7 (+3)	COPS4	48 kDa	0	0	#DIV/0!
Cystatin-M OS=Homo sapiens OX=9606 GN=CST6 PE=1 SV=1	Q15828	CST6	17 kDa	0	0	#DIV/0!
Telomerase protein component 1 OS=Homo sapiens OX=9606 GN=TEP1 PE=1 SV=1	G3V2A4 (+3)	TEP1	208 kDa	0	0	#DIV/0!
Terminal uridylyltransferase 7 OS=Homo sapiens OX=9606 GN=TUT7 PE=1 SV=1	Q5VYS8 (+2)	TUT7	171 kDa	0	0	#DIV/0!
DNA/RNA-binding protein KIN17 OS=Homo sapiens OX=9606 GN=KIN PE=1 SV=2	O60870 (+1)	KIN	45 kDa	0	0	#DIV/0!
Cleavage stimulation factor subunit 1 OS=Homo sapiens OX=9606 GN=CSTF1 PE=1 SV=1	Q05048	CSTF1	48 kDa	0	0	#DIV/0!
Protein RFT1 homolog OS=Homo sapiens OX=9606 GN=RFT1 PE=1 SV=1	B5MDE0 (+1)	RFT1	56 kDa	0	0	#DIV/0!
FERM, ARHGEF and pleckstrin domain-containing protein 1 OS=Homo sapiens OX=9606 GN=FARP1 PE=1 SV=1	Q9Y4F1	FARP1	119 kDa	0	0	#DIV/0!
Pancreatic alpha-amylase OS=Homo sapiens OX=9606 GN=AMY2A PE=1 SV=2	P04746 (+4)	AMY2A	58 kDa	0	0	#DIV/0!
Thioredoxin domain-containing protein 12 OS=Homo sapiens OX=9606 GN=TXNDC12 PE=1 SV=1	O95881	TXNDC12	19 kDa	0	0	#DIV/0!
Protein tyrosine phosphatase type IVA 2 OS=Homo sapiens OX=9606 GN=PTP4A2 PE=1 SV=1	Q12974 (+2)	PTP4A2	19 kDa	0	0	#DIV/0!
DNA-directed RNA polymerases I, II, and III subunit RPABC3 (Fragment) OS=Homo sapiens OX=9606 GN=POLR2H PE=1 SV=8	C9JLU1 (+2)	POLR2H	17 kDa	0	0	#DIV/0!
Zinc finger protein 787 OS=Homo sapiens OX=9606 GN=ZNF787 PE=1 SV=4	Q6DD87	ZNF787	40 kDa	0	0	#DIV/0!
Zinc finger SWIM domain-containing protein 5 OS=Homo sapiens OX=9606 GN=ZSWIM5 PE=2 SV=2	Q9P217	ZSWIM5	131 kDa	0	0	#DIV/0!
Ethanolamine-phosphate cytidylyltransferase (Fragment) OS=Homo sapiens OX=9606 GN=PCYT2 PE=1 SV=1	I3L1L9 (+4)	PCYT2	35 kDa	0	0	#DIV/0!
Protein S100-P OS=Homo sapiens OX=9606 GN=S100P PE=1 SV=2	P25815	S100P	10 kDa	0	0	#DIV/0!
Ubiquitin carboxyl-terminal hydrolase 5 OS=Homo sapiens OX=9606 GN=USP5 PE=1 SV=2	P45974 (+1)	USP5	96 kDa	0	0	#DIV/0!
Cytosolic iron-sulfur assembly component 2B (Fragment) OS=Homo sapiens OX=9606 GN=CIAO2B PE=1 SV=1	H3BNV7	CIAO2B	18 kDa	0	0	#DIV/0!
Bcl-2-associated transcription factor 1 (Fragment) OS=Homo sapiens OX=9606 GN=BCLAF1 PE=1 SV=8	E9PK09 (+6)	BCLAF1	83 kDa	6.6398	0.97052	6.84149
40S ribosomal protein S3a OS=Entamoeba histolytica OX=5759 GN=EHI_065270 PE=2 SV=1	C4M609	EHI_065270	29 kDa	11.62	1.941	5.9866
H/ACA ribonucleoprotein complex subunit DKC1 OS=Homo sapiens OX=9606 GN=DKC1 PE=1 SV=3	O60832	DKC1	58 kDa	4.9798	0.97052	5.13106
Cytoplasmic dynein 1 intermediate chain 2 OS=Homo sapiens OX=9606 GN=DYNC1I2 PE=1 SV=3	Q13409 (+5)	DYNC1I2	71 kDa	4.1499	0.97052	4.27596
FACT complex subunit SSRP1 OS=Homo sapiens OX=9606 GN=SSRP1 PE=1 SV=1	Q08945	SSRP1	81 kDa	4.1499	0.97052	4.27596
Inorganic pyrophosphatase OS=Homo sapiens OX=9606 GN=PPA1 PE=1 SV=2	Q15181	PPA1	33 kDa	4.1499	0.97052	4.27596
Cisplatin resistance-associated overexpressed protein, isoform CRA_b OS=Homo sapiens OX=9606 GN=LUC7L3 PE=1 SV=1	J3KPP4 (+1)	LUC7L3	58 kDa	4.1499	0.97052	4.27596
Pre-mRNA-processing factor 6 OS=Homo sapiens OX=9606 GN=PRPF6 PE=1 SV=1	O94906	PRPF6	107 kDa	11.62	2.9115	3.99107
Eukaryotic translation initiation factor 2D OS=Homo sapiens OX=9606 GN=EIF2D PE=1 SV=3	P41214	EIF2D	65 kDa	7.4697	1.941	3.84838
General transcription factor 3C polypeptide 1 OS=Homo sapiens OX=9606 GN=GTF3C1 PE=1 SV=4	Q12789	GTF3C1	239 kDa	13.28	3.8821	3.42083
26S proteasome regulatory subunit 7 OS=Homo sapiens OX=9606 GN=PSMC2 PE=1 SV=1	C9JX88 (+1)	PSMC2	48 kDa	6.6398	1.941	3.42081
Far upstream element-binding protein 2 OS=Homo sapiens OX=9606 GN=KHSRP PE=1 SV=1	A0A087WTP3 (+1)	KHSRP	73 kDa	6.6398	1.941	3.42081
40S ribosomal protein S6 OS=Entamoeba histolytica OX=5759 GN=EHI_013890 PE=2 SV=1	C4LXN2	EHI_013890	30 kDa	6.6398	1.941	3.42081
Coatomer subunit beta OS=Homo sapiens OX=9606 GN=COPB1 PE=1 SV=3	P53618	COPB1	107 kDa	9.9596	2.9115	3.42078
Protein pelota homolog OS=Homo sapiens OX=9606 GN=PELO PE=1 SV=2	Q9BRX2	PELO	43 kDa	3.3199	0.97052	3.42074
A-kinase anchor protein 9 OS=Homo sapiens OX=9606 GN=AKAP9 PE=1 SV=2	A0A0A0MRF6 (+5)	AKAP9	456 kDa	16.599	4.8526	3.42064
Pre-rRNA-processing protein TSR1 homolog OS=Homo sapiens OX=9606 GN=TSR1 PE=1 SV=1	Q2NL82	TSR1	92 kDa	9.1297	2.9115	3.13574
Serine/threonine-protein kinase PAK 4 OS=Homo sapiens OX=9606 GN=PAK4 PE=1 SV=1	O96013	PAK4	64 kDa	5.8098	1.941	2.9932
Thyroid hormone receptor-associated protein 3 OS=Homo sapiens OX=9606 GN=THRAP3 PE=1 SV=1	A0A3B3ITZ9 (+1)	THRAP3	104 kDa	4.9798	1.941	2.56558
Zinc finger CCCH domain-containing protein 18 OS=Homo sapiens OX=9606 GN=ZC3H18 PE=1 SV=1	E7ERS3 (+1)	ZC3H18	109 kDa	4.9798	1.941	2.56558
RING finger protein 214 OS=Homo sapiens OX=9606 GN=RNF214 PE=1 SV=2	Q8ND24	RNF214	78 kDa	4.9798	1.941	2.56558
Casein kinase II subunit alpha OS=Homo sapiens OX=9606 GN=CSNK2A1 PE=1 SV=1	A0A2R8Y5A0 (+4)	CSNK2A1	41 kDa	4.9798	1.941	2.56558
GTP-binding protein 1 OS=Homo sapiens OX=9606 GN=GTPBP1 PE=1 SV=3	O00178	GTPBP1	72 kDa	4.9798	1.941	2.56558
Putative RNA-binding protein Luc7-like 1 OS=Homo sapiens OX=9606 GN=LUC7L PE=1 SV=1	Q9NQ29 (+1)	LUC7L	44 kDa	4.9798	1.941	2.56558
Histone H1.10 OS=Homo sapiens OX=9606 GN=H1-10 PE=1 SV=1	Q92522	H1-10	22 kDa	7.4697	2.9115	2.56558
Structural maintenance of chromosomes protein 3 OS=Homo sapiens OX=9606 GN=SMC3 PE=1 SV=2	Q9UQE7	SMC3	142 kDa	7.4697	2.9115	2.56558
Putative RNA-binding protein Luc7-like 2 OS=Homo sapiens OX=9606 GN=LUC7L2 PE=1 SV=2	Q9Y383	LUC7L2	47 kDa	7.4697	2.9115	2.56558
Erlin-1 OS=Homo sapiens OX=9606 GN=ERLIN1 PE=1 SV=2	O75477	ERLIN1	39 kDa	2.4899	0.97052	2.56553
Dynamin-2 OS=Homo sapiens OX=9606 GN=DNM2 PE=1 SV=2	P50570 (+4)	DNM2	98 kDa	2.4899	0.97052	2.56553
Septin 10, isoform CRA_c OS=Homo sapiens OX=9606 GN=SEPTIN10 PE=1 SV=2	B5ME97 (+5)	SEPTIN10	63 kDa	2.4899	0.97052	2.56553
Alpha-2-macroglobulin OS=Homo sapiens OX=9606 GN=A2M PE=1 SV=3	P01023	A2M	163 kDa	2.4899	0.97052	2.56553
Protein PRRC2B OS=Homo sapiens OX=9606 GN=PRRC2B PE=1 SV=2	Q5JSZ5	PRRC2B	243 kDa	9.9596	3.8821	2.56552
DNA topoisomerase 2-alpha OS=Homo sapiens OX=9606 GN=TOP2A PE=1 SV=3	P11388 (+3)	TOP2A	174 kDa	9.1297	3.8821	2.35174
CCR4-NOT transcription complex subunit 9 OS=Homo sapiens OX=9606 GN=CNOT9 PE=1 SV=1	Q92600 (+1)	CNOT9	34 kDa	6.6398	2.9115	2.28054
Gamma-taxilin OS=Homo sapiens OX=9606 GN=TXLNG PE=1 SV=2	Q9NUQ3	TXLNG	61 kDa	6.6398	2.9115	2.28054
Exosome RNA helicase MTR4 OS=Homo sapiens OX=9606 GN=MTREX PE=1 SV=3	P42285	MTREX	118 kDa	10.79	4.8526	2.22355
TBC1 domain family member 4 OS=Homo sapiens OX=9606 GN=TBC1D4 PE=1 SV=2	O60343 (+2)	TBC1D4	147 kDa	4.1499	1.941	2.13802
Structural maintenance of chromosomes protein 2 OS=Homo sapiens OX=9606 GN=SMC2 PE=1 SV=2	O95347 (+1)	SMC2	136 kDa	4.1499	1.941	2.13802
Vesicle-associated membrane protein-associated protein B/C OS=Homo sapiens OX=9606 GN=VAPB PE=1 SV=3	O95292	VAPB	27 kDa	4.1499	1.941	2.13802
26S proteasome non-ATPase regulatory subunit 6 OS=Homo sapiens OX=9606 GN=PSMD6 PE=1 SV=1	Q15008 (+1)	PSMD6	46 kDa	4.1499	1.941	2.13802
Gem-associated protein 4 OS=Homo sapiens OX=9606 GN=GEMIN4 PE=1 SV=1	I3L2C7 (+1)	GEMIN4	119 kDa	4.1499	1.941	2.13802
Tetratricopeptide repeat protein 37 OS=Homo sapiens OX=9606 GN=TTC37 PE=1 SV=1	Q6PGP7	TTC37	175 kDa	4.1499	1.941	2.13802
Isocitrate dehydrogenase [NADP] cytoplasmic OS=Homo sapiens OX=9606 GN=IDH1 PE=1 SV=2	O75874	IDH1	47 kDa	4.1499	1.941	2.13802
Fumarate hydratase, mitochondrial OS=Homo sapiens OX=9606 GN=FH PE=1 SV=3	P07954 (+1)	FH	55 kDa	4.1499	1.941	2.13802
Cell division cycle 5-like protein OS=Homo sapiens OX=9606 GN=CDC5L PE=1 SV=2	Q99459	CDC5L	92 kDa	4.1499	1.941	2.13802
RNA-binding protein Musashi homolog 2 (Fragment) OS=Homo sapiens OX=9606 GN=MSI2 PE=1 SV=1	A0A6Q8PF05 (+3)	MSI2	37 kDa	4.1499	1.941	2.13802
UTP--glucose-1-phosphate uridylyltransferase OS=Homo sapiens OX=9606 GN=UGP2 PE=1 SV=5	Q16851	UGP2	57 kDa	4.1499	1.941	2.13802
Probable dimethyladenosine transferase OS=Homo sapiens OX=9606 GN=DIMT1 PE=1 SV=1	Q9UNQ2	DIMT1	35 kDa	4.1499	1.941	2.13802
Far upstream element-binding protein 1 OS=Homo sapiens OX=9606 GN=FUBP1 PE=1 SV=1	E9PEB5 (+2)	FUBP1	69 kDa	4.1499	1.941	2.13802
DnaJ homolog subfamily C member 21 OS=Homo sapiens OX=9606 GN=DNAJC21 PE=1 SV=2	Q5F1R6 (+2)	DNAJC21	62 kDa	4.1499	1.941	2.13802
Kinesin-like protein KIF2C OS=Homo sapiens OX=9606 GN=KIF2C PE=1 SV=2	Q99661 (+1)	KIF2C	81 kDa	4.1499	1.941	2.13802
Splicing factor 3B subunit 1 OS=Homo sapiens OX=9606 GN=SF3B1 PE=1 SV=3	O75533	SF3B1	146 kDa	8.2997	3.8821	2.13794
RNA helicase OS=Homo sapiens OX=9606 GN=DDX27 PE=1 SV=1	B7Z6D5 (+1)	DDX27	87 kDa	11.62	5.8231	1.9955
Asparagine--tRNA ligase, cytoplasmic OS=Homo sapiens OX=9606 GN=NARS1 PE=1 SV=1	O43776	NARS1	63 kDa	5.8098	2.9115	1.99547
Microprocessor complex subunit DGCR8 OS=Homo sapiens OX=9606 GN=DGCR8 PE=1 SV=1	Q8WYQ5 (+1)	DGCR8	86 kDa	5.8098	2.9115	1.99547
5'-3' exoribonuclease 2 OS=Homo sapiens OX=9606 GN=XRN2 PE=1 SV=1	Q9H0D6 (+1)	XRN2	109 kDa	5.8098	2.9115	1.99547
Importin-5 OS=Homo sapiens OX=9606 GN=IPO5 PE=1 SV=4	O00410 (+1)	IPO5	124 kDa	5.8098	2.9115	1.99547
Guanine nucleotide exchange factor H1 OS=Homo sapiens OX=9606 GN=ARHGEF2 PE=1 SV=1	A0A5F9ZI21 (+4)	ARHGEF2	127 kDa	5.8098	2.9115	1.99547
Signal recognition particle 54 kDa protein OS=Homo sapiens OX=9606 GN=SRP54 PE=1 SV=1	P61011	SRP54	56 kDa	5.8098	2.9115	1.99547
U4/U6.U5 tri-snRNP-associated protein 2 OS=Homo sapiens OX=9606 GN=USP39 PE=1 SV=2	Q53GS9	USP39	65 kDa	5.8098	2.9115	1.99547
Eukaryotic peptide chain release factor GTP-binding subunit ERF3A (Fragment) OS=Homo sapiens OX=9606 GN=GSPT1 PE=1 SV=1	H3BR35 (+3)	GSPT1	53 kDa	5.8098	2.9115	1.99547
Transmembrane protein 214 OS=Homo sapiens OX=9606 GN=TMEM214 PE=1 SV=2	Q6NUQ4	TMEM214	77 kDa	5.8098	2.9115	1.99547
Catenin alpha-1 OS=Homo sapiens OX=9606 GN=CTNNA1 PE=1 SV=1	P35221 (+1)	CTNNA1	100 kDa	13.28	6.7936	1.95478
Serine/arginine repetitive matrix protein 2 OS=Homo sapiens OX=9606 GN=SRRM2 PE=1 SV=2	Q9UQ35	SRRM2	300 kDa	7.4697	3.8821	1.92414
ATP-binding cassette sub-family E member 1 OS=Homo sapiens OX=9606 GN=ABCE1 PE=1 SV=1	P61221	ABCE1	67 kDa	7.4697	3.8821	1.92414
Signal recognition particle subunit SRP72 OS=Homo sapiens OX=9606 GN=SRP72 PE=1 SV=3	O76094	SRP72	75 kDa	7.4697	3.8821	1.92414
DnaJ homolog subfamily A member 1 OS=Homo sapiens OX=9606 GN=DNAJA1 PE=1 SV=2	P31689	DNAJA1	45 kDa	7.4697	3.8821	1.92414
Splicing factor 3B subunit 3 OS=Homo sapiens OX=9606 GN=SF3B3 PE=1 SV=4	Q15393	SF3B3	136 kDa	10.79	5.8231	1.85296
RuvB-like 2 OS=Homo sapiens OX=9606 GN=RUVBL2 PE=1 SV=3	Q9Y230	RUVBL2	51 kDa	14.11	7.7641	1.81734
116 kDa U5 small nuclear ribonucleoprotein component OS=Homo sapiens OX=9606 GN=EFTUD2 PE=1 SV=1	Q15029 (+2)	EFTUD2	109 kDa	11.62	6.7936	1.71043
DNA replication licensing factor MCM7 OS=Homo sapiens OX=9606 GN=MCM7 PE=1 SV=4	P33993	MCM7	81 kDa	11.62	6.7936	1.71043
Probable ATP-dependent RNA helicase DDX23 OS=Homo sapiens OX=9606 GN=DDX23 PE=1 SV=3	Q9BUQ8	DDX23	96 kDa	11.62	6.7936	1.71043
Glucosidase 2 subunit beta OS=Homo sapiens OX=9606 GN=PRKCSH PE=1 SV=1	K7ELL7 (+2)	PRKCSH	60 kDa	3.3199	1.941	1.71041
Lysosomal acid phosphatase OS=Homo sapiens OX=9606 GN=ACP2 PE=1 SV=3	P11117	ACP2	48 kDa	3.3199	1.941	1.71041
60S ribosomal protein L22 OS=Homo sapiens OX=9606 GN=RPL22 PE=1 SV=1	K7ERI7 (+1)	RPL22	11 kDa	3.3199	1.941	1.71041
Laminin subunit alpha-5 OS=Homo sapiens OX=9606 GN=LAMA5 PE=1 SV=8	O15230	LAMA5	400 kDa	3.3199	1.941	1.71041
Mitogen-activated protein kinase 1 OS=Homo sapiens OX=9606 GN=MAPK1 PE=1 SV=3	P28482	MAPK1	41 kDa	3.3199	1.941	1.71041
TAR DNA-binding protein 43 OS=Homo sapiens OX=9606 GN=TARDBP PE=1 SV=1	Q13148	TARDBP	45 kDa	3.3199	1.941	1.71041
Histone H3 (Fragment) OS=Homo sapiens OX=9606 GN=H3-3B PE=1 SV=1	K7EK07 (+3)	H3-3B	15 kDa	3.3199	1.941	1.71041
Dystonin OS=Homo sapiens OX=9606 GN=DST PE=1 SV=1	F8W9J4 (+1)	DST	848 kDa	3.3199	1.941	1.71041
WD repeat-containing protein 82 OS=Homo sapiens OX=9606 GN=WDR82 PE=1 SV=1	Q6UXN9	WDR82	35 kDa	3.3199	1.941	1.71041
Unconventional myosin-6 OS=Homo sapiens OX=9606 GN=MYO6 PE=1 SV=1	A0A0A0MRM8 (+9)	MYO6	145 kDa	3.3199	1.941	1.71041
ATP synthase subunit O, mitochondrial OS=Homo sapiens OX=9606 GN=ATP5PO PE=1 SV=1	P48047	ATP5PO	23 kDa	3.3199	1.941	1.71041
Hyaluronan mediated motility receptor OS=Homo sapiens OX=9606 GN=HMMR PE=1 SV=2	O75330 (+3)	HMMR	84 kDa	3.3199	1.941	1.71041
Isoform 3 of Centromere protein V OS=Homo sapiens OX=9606 GN=CENPV	Q7Z7K6-3	CENPV	30 kDa	3.3199	1.941	1.71041
Exosome component 10 OS=Homo sapiens OX=9606 GN=EXOSC10 PE=1 SV=2	Q01780	EXOSC10	101 kDa	4.9798	2.9115	1.71039
Enoyl-CoA hydratase, mitochondrial OS=Homo sapiens OX=9606 GN=ECHS1 PE=1 SV=4	P30084	ECHS1	31 kDa	4.9798	2.9115	1.71039
RNA-binding protein 39 OS=Homo sapiens OX=9606 GN=RBM39 PE=1 SV=2	Q14498 (+2)	RBM39	59 kDa	4.9798	2.9115	1.71039
Procollagen galactosyltransferase 1 OS=Homo sapiens OX=9606 GN=COLGALT1 PE=1 SV=1	Q8NBJ5	COLGALT1	72 kDa	4.9798	2.9115	1.71039
Citrate synthase OS=Homo sapiens OX=9606 GN=CS PE=1 SV=1	B4DJV2 (+1)	CS	50 kDa	4.9798	2.9115	1.71039
Protein S100-A7 OS=Homo sapiens OX=9606 GN=S100A7 PE=1 SV=4	P31151	S100A7	11 kDa	4.9798	2.9115	1.71039
Heat shock protein 75 kDa, mitochondrial OS=Homo sapiens OX=9606 GN=TRAP1 PE=1 SV=3	Q12931 (+1)	TRAP1	80 kDa	4.9798	2.9115	1.71039
1,4-beta-N-acetylmuramidase C OS=Homo sapiens OX=9606 GN=LYZ PE=1 SV=1	A0A0B4J259 (+2)	LYZ	15 kDa	4.9798	2.9115	1.71039
Zinc finger CCCH domain-containing protein 7B OS=Homo sapiens OX=9606 GN=ZC3H7B PE=1 SV=2	Q9UGR2	ZC3H7B	110 kDa	4.9798	2.9115	1.71039
rRNA 2'-O-methyltransferase fibrillarin OS=Homo sapiens OX=9606 GN=FBL PE=1 SV=2	P22087	FBL	34 kDa	4.9798	2.9115	1.71039
Eukaryotic translation initiation factor 4 gamma 3 OS=Homo sapiens OX=9606 GN=EIF4G3 PE=1 SV=2	A0A0U1RQK7	EIF4G3	195 kDa	19.919	11.646	1.71037
ATP-citrate synthase OS=Homo sapiens OX=9606 GN=ACLY PE=1 SV=3	P53396 (+1)	ACLY	121 kDa	6.6398	3.8821	1.71036
Signal recognition particle subunit SRP68 OS=Homo sapiens OX=9606 GN=SRP68 PE=1 SV=2	Q9UHB9	SRP68	71 kDa	6.6398	3.8821	1.71036
Heterogeneous nuclear ribonucleoprotein D-like OS=Homo sapiens OX=9606 GN=HNRNPDL PE=1 SV=1	A0A087WUK2 (+1)	HNRNPDL	40 kDa	6.6398	3.8821	1.71036
UDP-glucose 6-dehydrogenase OS=Homo sapiens OX=9606 GN=UGDH PE=1 SV=1	O60701	UGDH	55 kDa	6.6398	3.8821	1.71036
Actin-related protein 2/3 complex subunit 1B OS=Homo sapiens OX=9606 GN=ARPC1B PE=1 SV=3	O15143	ARPC1B	41 kDa	6.6398	3.8821	1.71036
Protein argonaute-2 OS=Homo sapiens OX=9606 GN=AGO2 PE=1 SV=3	Q9UKV8	AGO2	97 kDa	8.2997	4.8526	1.71036
General transcription factor 3C polypeptide 5 OS=Homo sapiens OX=9606 GN=GTF3C5 PE=1 SV=2	Q9Y5Q8 (+1)	GTF3C5	60 kDa	9.9596	5.8231	1.71036
Pre-mRNA-splicing factor ATP-dependent RNA helicase DHX15 OS=Homo sapiens OX=9606 GN=DHX15 PE=1 SV=2	O43143	DHX15	91 kDa	9.9596	5.8231	1.71036
Trifunctional purine biosynthetic protein adenosine-3 OS=Homo sapiens OX=9606 GN=GART PE=1 SV=1	P22102	GART	108 kDa	1.6599	0.97052	1.71032
Ras-related protein Rab-2A OS=Homo sapiens OX=9606 GN=RAB2A PE=1 SV=1	P61019	RAB2A	24 kDa	1.6599	0.97052	1.71032
Eukaryotic translation initiation factor 4E type 2 OS=Homo sapiens OX=9606 GN=EIF4E2 PE=1 SV=1	B8ZZ50 (+4)	EIF4E2	27 kDa	1.6599	0.97052	1.71032
Grainin 1 OS=Entamoeba histolytica OX=5759 GN=EHI_167300 PE=4 SV=1	C4MAF9	EHI_167300	24 kDa	1.6599	0.97052	1.71032
Casein kinase I isoform alpha OS=Homo sapiens OX=9606 GN=CSNK1A1 PE=1 SV=1	A0A590UJ43 (+5)	CSNK1A1	49 kDa	1.6599	0.97052	1.71032
Ankyrin repeat domain-containing protein 17 (Fragment) OS=Homo sapiens OX=9606 GN=ANKRD17 PE=1 SV=1	H0YM23 (+3)	ANKRD17	263 kDa	15.769	9.7052	1.6248
Pre-mRNA-processing-splicing factor 8 OS=Homo sapiens OX=9606 GN=PRPF8 PE=1 SV=2	Q6P2Q9	PRPF8	274 kDa	28.219	17.469	1.61538
DNA topoisomerase 1 OS=Homo sapiens OX=9606 GN=TOP1 PE=1 SV=2	P11387	TOP1	91 kDa	19.919	12.617	1.57874
Major vault protein OS=Homo sapiens OX=9606 GN=MVP PE=1 SV=4	Q14764	MVP	99 kDa	9.1297	5.8231	1.56784
DNA damage-binding protein 1 OS=Homo sapiens OX=9606 GN=DDB1 PE=1 SV=1	Q16531	DDB1	127 kDa	9.1297	5.8231	1.56784
U1 small nuclear ribonucleoprotein 70 kDa OS=Homo sapiens OX=9606 GN=SNRNP70 PE=1 SV=2	P08621	SNRNP70	52 kDa	9.1297	5.8231	1.56784
RNA-binding protein 4 OS=Homo sapiens OX=9606 GN=RBM4 PE=1 SV=1	Q9BWF3	RBM4	40 kDa	9.1297	5.8231	1.56784
Transcription factor A, mitochondrial OS=Homo sapiens OX=9606 GN=TFAM PE=1 SV=1	Q00059	TFAM	29 kDa	9.1297	5.8231	1.56784
Poly [ADP-ribose] polymerase 1 OS=Homo sapiens OX=9606 GN=PARP1 PE=1 SV=4	P09874	PARP1	113 kDa	18.259	11.646	1.56783
U5 small nuclear ribonucleoprotein 200 kDa helicase OS=Homo sapiens OX=9606 GN=SNRNP200 PE=1 SV=2	O75643	SNRNP200	245 kDa	24.069	15.528	1.55004
Coatomer subunit beta' OS=Homo sapiens OX=9606 GN=COPB2 PE=1 SV=2	H0Y938 (+3)	COPB2	102 kDa	7.4697	4.8526	1.53932
RuvB-like 1 OS=Homo sapiens OX=9606 GN=RUVBL1 PE=1 SV=1	Q9Y265	RUVBL1	50 kDa	7.4697	4.8526	1.53932
Fragile X mental retardation syndrome-related protein 2 OS=Homo sapiens OX=9606 GN=FXR2 PE=1 SV=2	P51116	FXR2	74 kDa	7.4697	4.8526	1.53932
Polypyrimidine tract-binding protein 1 OS=Homo sapiens OX=9606 GN=PTBP1 PE=4 SV=1	A0A7I2V621 (+4)	PTBP1	60 kDa	7.4697	4.8526	1.53932
Prohibitin-2 OS=Homo sapiens OX=9606 GN=PHB2 PE=1 SV=2	Q99623	PHB2	33 kDa	7.4697	4.8526	1.53932
Serine/threonine-protein kinase MRCK gamma OS=Homo sapiens OX=9606 GN=CDC42BPG PE=1 SV=2	Q6DT37	CDC42BPG	172 kDa	22.409	14.558	1.53929
Methylmalonyl-CoA mutase, mitochondrial OS=Homo sapiens OX=9606 GN=MMUT PE=1 SV=4	P22033	MMUT	83 kDa	22.409	14.558	1.53929
Non-POU domain-containing octamer-binding protein OS=Homo sapiens OX=9606 GN=NONO PE=4 SV=1	A0A7I2V535 (+3)	NONO	58 kDa	11.62	7.7641	1.49663
Ankyrin repeat and KH domain-containing protein 1 OS=Homo sapiens OX=9606 GN=ANKHD1 PE=1 SV=1	Q8IWZ3 (+2)	ANKHD1	269 kDa	17.429	11.646	1.49657
GRB10-interacting GYF protein 2 OS=Homo sapiens OX=9606 GN=GIGYF2 PE=1 SV=1	Q6Y7W6	GIGYF2	150 kDa	17.429	11.646	1.49657
Neutral alpha-glucosidase AB OS=Homo sapiens OX=9606 GN=GANAB PE=1 SV=3	Q14697 (+1)	GANAB	107 kDa	5.8098	3.8821	1.49656
Dynamin-1-like protein OS=Homo sapiens OX=9606 GN=DNM1L PE=1 SV=2	O00429 (+2)	DNM1L	82 kDa	5.8098	3.8821	1.49656
26S proteasome non-ATPase regulatory subunit 1 OS=Homo sapiens OX=9606 GN=PSMD1 PE=1 SV=2	A0A087WW66 (+2)	PSMD1	102 kDa	5.8098	3.8821	1.49656
Activating signal cointegrator 1 complex subunit 2 OS=Homo sapiens OX=9606 GN=ASCC2 PE=1 SV=3	Q9H1I8	ASCC2	86 kDa	5.8098	3.8821	1.49656
40S ribosomal protein S20 OS=Homo sapiens OX=9606 GN=RPS20 PE=1 SV=1	P60866 (+1)	RPS20	13 kDa	5.8098	3.8821	1.49656
Zinc finger CCCH domain-containing protein 7A OS=Homo sapiens OX=9606 GN=ZC3H7A PE=1 SV=1	Q8IWR0	ZC3H7A	111 kDa	5.8098	3.8821	1.49656
Exportin-1 OS=Homo sapiens OX=9606 GN=XPO1 PE=4 SV=1	A0A7I2V2Y6 (+1)	XPO1	118 kDa	5.8098	3.8821	1.49656
Probable 28S rRNA (cytosine(4447)-C(5))-methyltransferase OS=Homo sapiens OX=9606 GN=NOP2 PE=1 SV=2	P46087 (+1)	NOP2	89 kDa	5.8098	3.8821	1.49656
Casein kinase II subunit beta OS=Homo sapiens OX=9606 GN=CSNK2B PE=4 SV=1	A0A7I2YQ78 (+2)	CSNK2B	27 kDa	5.8098	3.8821	1.49656
Mitogen-activated protein kinase kinase kinase 20 OS=Homo sapiens OX=9606 GN=MAP3K20 PE=1 SV=3	Q9NYL2	MAP3K20	91 kDa	5.8098	3.8821	1.49656
SH2 domain-containing protein 3A OS=Homo sapiens OX=9606 GN=SH2D3A PE=1 SV=1	Q9BRG2	SH2D3A	63 kDa	5.8098	3.8821	1.49656
Protein LSM14 homolog A OS=Homo sapiens OX=9606 GN=LSM14A PE=1 SV=3	Q8ND56 (+1)	LSM14A	51 kDa	5.8098	3.8821	1.49656
60S ribosomal protein L35 OS=Homo sapiens OX=9606 GN=RPL35 PE=1 SV=2	P42766	RPL35	15 kDa	5.8098	3.8821	1.49656
Retrotransposon-derived protein PEG10 OS=Homo sapiens OX=9606 GN=PEG10 PE=1 SV=1	A0A087WX23	PEG10	88 kDa	5.8098	3.8821	1.49656
60S ribosomal protein L21 OS=Homo sapiens OX=9606 GN=RPL21 PE=1 SV=2	P46778	RPL21	19 kDa	9.9596	6.7936	1.46603
60S ribosomal protein L30 OS=Homo sapiens OX=9606 GN=RPL30 PE=1 SV=2	P62888	RPL30	13 kDa	9.9596	6.7936	1.46603
Isoform 2 of Septin-2 OS=Homo sapiens OX=9606 GN=SEPTIN2	Q15019-2	SEPTIN2	45 kDa	9.9596	6.7936	1.46603
Histone H1.2 OS=Homo sapiens OX=9606 GN=H1-2 PE=1 SV=2	P16403	H1-2	21 kDa	9.9596	6.7936	1.46603
CCR4-NOT transcription complex subunit 3 OS=Homo sapiens OX=9606 GN=CNOT3 PE=1 SV=1	O75175	CNOT3	82 kDa	9.9596	6.7936	1.46603
RNA-splicing ligase RtcB homolog OS=Homo sapiens OX=9606 GN=RTCB PE=1 SV=1	Q9Y3I0	RTCB	55 kDa	24.069	16.499	1.45882
14-3-3 protein epsilon OS=Homo sapiens OX=9606 GN=YWHAE PE=1 SV=1	P62258	YWHAE	29 kDa	14.11	9.7052	1.45386
Isoform 5 of Ubiquitin-associated protein 2-like OS=Homo sapiens OX=9606 GN=UBAP2L	Q14157-5	UBAP2L	117 kDa	18.259	12.617	1.44717
26S proteasome non-ATPase regulatory subunit 11 OS=Homo sapiens OX=9606 GN=PSMD11 PE=1 SV=3	O00231 (+1)	PSMD11	47 kDa	4.1499	2.9115	1.42535
Ribosome maturation protein SBDS OS=Homo sapiens OX=9606 GN=SBDS PE=1 SV=1	A0A087X020 (+1)	SBDS	29 kDa	4.1499	2.9115	1.42535
Activating signal cointegrator 1 OS=Homo sapiens OX=9606 GN=TRIP4 PE=1 SV=4	Q15650	TRIP4	66 kDa	4.1499	2.9115	1.42535
Myosin light polypeptide 6 OS=Homo sapiens OX=9606 GN=MYL6 PE=1 SV=1	B7Z6Z4 (+6)	MYL6	27 kDa	4.1499	2.9115	1.42535
Eukaryotic translation initiation factor 6 OS=Homo sapiens OX=9606 GN=EIF6 PE=1 SV=1	P56537	EIF6	27 kDa	4.1499	2.9115	1.42535
General transcription factor 3C polypeptide 3 OS=Homo sapiens OX=9606 GN=GTF3C3 PE=1 SV=1	Q9Y5Q9	GTF3C3	101 kDa	4.1499	2.9115	1.42535
60S ribosomal protein L36a-like OS=Homo sapiens OX=9606 GN=RPL36AL PE=1 SV=3	Q969Q0	RPL36AL	12 kDa	4.1499	2.9115	1.42535
NADH-cytochrome b5 reductase 3 OS=Homo sapiens OX=9606 GN=CYB5R3 PE=1 SV=3	P00387 (+2)	CYB5R3	34 kDa	4.1499	2.9115	1.42535
Nck-associated protein 1 OS=Homo sapiens OX=9606 GN=NCKAP1 PE=1 SV=1	Q9Y2A7 (+1)	NCKAP1	129 kDa	4.1499	2.9115	1.42535
N-acylneuraminate cytidylyltransferase OS=Homo sapiens OX=9606 GN=CMAS PE=1 SV=2	Q8NFW8	CMAS	48 kDa	4.1499	2.9115	1.42535
Polyadenylate-binding protein-interacting protein 1 OS=Homo sapiens OX=9606 GN=PAIP1 PE=1 SV=1	Q9H074 (+2)	PAIP1	54 kDa	4.1499	2.9115	1.42535
V-type proton ATPase subunit B, brain isoform OS=Homo sapiens OX=9606 GN=ATP6V1B2 PE=1 SV=3	P21281	ATP6V1B2	57 kDa	4.1499	2.9115	1.42535
CCR4-NOT transcription complex subunit 2 OS=Homo sapiens OX=9606 GN=CNOT2 PE=1 SV=2	F8VUB4 (+2)	CNOT2	57 kDa	4.1499	2.9115	1.42535
DnaJ homolog subfamily B member 1 OS=Homo sapiens OX=9606 GN=DNAJB1 PE=1 SV=4	P25685	DNAJB1	38 kDa	4.1499	2.9115	1.42535
Stomatin-like protein 2, mitochondrial OS=Homo sapiens OX=9606 GN=STOML2 PE=1 SV=1	A0A087WYB4 (+2)	STOML2	33 kDa	4.1499	2.9115	1.42535
LINE-1 retrotransposable element ORF1 protein OS=Homo sapiens OX=9606 GN=L1RE1 PE=1 SV=1	Q9UN81	L1RE1	40 kDa	8.2997	5.8231	1.42531
Serine/arginine-rich splicing factor 9 OS=Homo sapiens OX=9606 GN=SRSF9 PE=1 SV=1	Q13242	SRSF9	26 kDa	8.2997	5.8231	1.42531
E3 ubiquitin-protein ligase TRIM21 OS=Homo sapiens OX=9606 GN=TRIM21 PE=1 SV=1	P19474	TRIM21	54 kDa	8.2997	5.8231	1.42531
Isoform 6 of Breast cancer anti-estrogen resistance protein 1 OS=Homo sapiens OX=9606 GN=BCAR1	P56945-6	BCAR1	98 kDa	16.599	11.646	1.4253
40S ribosomal protein S13 OS=Homo sapiens OX=9606 GN=RPS13 PE=1 SV=2	P62277	RPS13	17 kDa	16.599	11.646	1.4253
40S ribosomal protein S8 OS=Homo sapiens OX=9606 GN=RPS8 PE=1 SV=2	P62241	RPS8	24 kDa	16.599	11.646	1.4253
Activating signal cointegrator 1 complex subunit 3 OS=Homo sapiens OX=9606 GN=ASCC3 PE=1 SV=3	Q8N3C0	ASCC3	251 kDa	23.239	16.499	1.40851
Eukaryotic translation initiation factor 2A OS=Homo sapiens OX=9606 GN=EIF2A PE=1 SV=3	Q9BY44	EIF2A	65 kDa	14.939	10.676	1.39931
La-related protein 4 OS=Homo sapiens OX=9606 GN=LARP4 PE=1 SV=3	Q71RC2 (+2)	LARP4	81 kDa	10.79	7.7641	1.38973
E3 ubiquitin-protein ligase TRIM71 OS=Homo sapiens OX=9606 GN=TRIM71 PE=1 SV=1	Q2Q1W2	TRIM71	93 kDa	10.79	7.7641	1.38973
Septin OS=Homo sapiens OX=9606 GN=SEPTIN7 PE=1 SV=2	E7EPK1 (+4)	SEPTIN7	51 kDa	10.79	7.7641	1.38973
ELAV-like protein 1 OS=Homo sapiens OX=9606 GN=ELAVL1 PE=1 SV=2	Q15717 (+1)	ELAVL1	36 kDa	13.28	9.7052	1.36834
Serine/threonine-protein phosphatase 2A 65 kDa regulatory subunit A alpha isoform OS=Homo sapiens OX=9606 GN=PPP2R1A PE=1 SV=4	P30153	PPP2R1A	65 kDa	6.6398	4.8526	1.3683
Vacuolar protein sorting-associated protein 35 OS=Homo sapiens OX=9606 GN=VPS35 PE=1 SV=2	Q96QK1	VPS35	92 kDa	6.6398	4.8526	1.3683
AP-3 complex subunit beta-1 OS=Homo sapiens OX=9606 GN=AP3B1 PE=1 SV=3	O00203 (+1)	AP3B1	121 kDa	6.6398	4.8526	1.3683
Isoform 5 of AP-3 complex subunit delta-1 OS=Homo sapiens OX=9606 GN=AP3D1	O14617-5	AP3D1	137 kDa	6.6398	4.8526	1.3683
60S ribosomal protein L37a OS=Homo sapiens OX=9606 GN=RPL37A PE=1 SV=2	P61513	RPL37A	10 kDa	6.6398	4.8526	1.3683
Mitotic checkpoint protein BUB3 OS=Homo sapiens OX=9606 GN=BUB3 PE=1 SV=1	O43684 (+1)	BUB3	37 kDa	6.6398	4.8526	1.3683
CCR4-NOT transcription complex subunit 10 OS=Homo sapiens OX=9606 GN=CNOT10 PE=1 SV=1	Q9H9A5 (+2)	CNOT10	82 kDa	6.6398	4.8526	1.3683
60S ribosomal protein L11 OS=Homo sapiens OX=9606 GN=RPL11 PE=1 SV=2	P62913 (+1)	RPL11	20 kDa	6.6398	4.8526	1.3683
Protein mago nashi homolog OS=Homo sapiens OX=9606 GN=MAGOH PE=1 SV=1	P61326 (+1)	MAGOH	17 kDa	6.6398	4.8526	1.3683
Protein FAM98A OS=Homo sapiens OX=9606 GN=FAM98A PE=1 SV=2	Q8NCA5	FAM98A	55 kDa	6.6398	4.8526	1.3683
Actin-related protein 3 OS=Homo sapiens OX=9606 GN=ACTR3 PE=1 SV=3	P61158	ACTR3	47 kDa	6.6398	4.8526	1.3683
Heterochromatin protein 1-binding protein 3 OS=Homo sapiens OX=9606 GN=HP1BP3 PE=1 SV=1	Q5SSJ5 (+1)	HP1BP3	61 kDa	6.6398	4.8526	1.3683
Intracellular hyaluronan-binding protein 4 OS=Homo sapiens OX=9606 GN=HABP4 PE=1 SV=1	Q5JVS0	HABP4	46 kDa	6.6398	4.8526	1.3683
Protein PRRC2A OS=Homo sapiens OX=9606 GN=PRRC2A PE=1 SV=3	P48634	PRRC2A	229 kDa	19.919	14.558	1.36825
Glutamine--fructose-6-phosphate aminotransferase [isomerizing] 1 OS=Homo sapiens OX=9606 GN=GFPT1 PE=1 SV=3	Q06210 (+1)	GFPT1	79 kDa	9.1297	6.7936	1.34387
40S ribosomal protein S25 OS=Homo sapiens OX=9606 GN=RPS25 PE=1 SV=1	P62851	RPS25	14 kDa	9.1297	6.7936	1.34387
Fragile X mental retardation syndrome-related protein 1 OS=Homo sapiens OX=9606 GN=FXR1 PE=1 SV=3	P51114	FXR1	70 kDa	20.749	15.528	1.33623
ATP-binding cassette sub-family F member 2 OS=Homo sapiens OX=9606 GN=ABCF2 PE=1 SV=2	Q9UG63 (+1)	ABCF2	71 kDa	20.749	15.528	1.33623
FACT complex subunit SPT16 OS=Homo sapiens OX=9606 GN=SUPT16H PE=1 SV=1	Q9Y5B9	SUPT16H	120 kDa	11.62	8.7346	1.33034
Gem-associated protein 5 OS=Homo sapiens OX=9606 GN=GEMIN5 PE=1 SV=3	Q8TEQ6	GEMIN5	169 kDa	11.62	8.7346	1.33034
Ataxin-2 OS=Homo sapiens OX=9606 GN=ATXN2 PE=1 SV=1	A0A2R8Y5A6 (+13)	ATXN2	126 kDa	11.62	8.7346	1.33034
60S ribosomal protein L36 OS=Homo sapiens OX=9606 GN=RPL36 PE=1 SV=3	Q9Y3U8	RPL36	12 kDa	11.62	8.7346	1.33034
DNA replication licensing factor MCM5 OS=Homo sapiens OX=9606 GN=MCM5 PE=1 SV=5	P33992	MCM5	82 kDa	11.62	8.7346	1.33034
Spliceosome RNA helicase DDX39B OS=Homo sapiens OX=9606 GN=DDX39B PE=1 SV=1	Q13838 (+1)	DDX39B	49 kDa	11.62	8.7346	1.33034
40S ribosomal protein S15a OS=Homo sapiens OX=9606 GN=RPS15A PE=1 SV=1	I3L3P7 (+1)	RPS15A	11 kDa	14.11	10.676	1.32166
Eukaryotic translation initiation factor 3 subunit I OS=Homo sapiens OX=9606 GN=EIF3I PE=4 SV=1	A0A7I2V3U3	EIF3I	36 kDa	16.599	12.617	1.31561
Kinesin-1 heavy chain OS=Homo sapiens OX=9606 GN=KIF5B PE=1 SV=1	P33176	KIF5B	110 kDa	12.45	9.7052	1.28282
DNA replication licensing factor MCM3 OS=Homo sapiens OX=9606 GN=MCM3 PE=1 SV=3	P25205 (+1)	MCM3	91 kDa	12.45	9.7052	1.28282
Basic leucine zipper and W2 domain-containing protein 2 (Fragment) OS=Homo sapiens OX=9606 GN=BZW2 PE=1 SV=1	E7ETZ4 (+1)	BZW2	47 kDa	12.45	9.7052	1.28282
Splicing factor, proline- and glutamine-rich OS=Homo sapiens OX=9606 GN=SFPQ PE=1 SV=2	P23246	SFPQ	76 kDa	12.45	9.7052	1.28282
YTH domain-containing family protein 1 OS=Homo sapiens OX=9606 GN=YTHDF1 PE=1 SV=1	Q9BYJ9	YTHDF1	61 kDa	12.45	9.7052	1.28282
Aminoacyl tRNA synthase complex-interacting multifunctional protein 2 OS=Homo sapiens OX=9606 GN=AIMP2 PE=1 SV=2	Q13155	AIMP2	35 kDa	2.4899	1.941	1.28279
RNA polymerase II-associated protein 3 OS=Homo sapiens OX=9606 GN=RPAP3 PE=1 SV=2	Q9H6T3 (+2)	RPAP3	76 kDa	2.4899	1.941	1.28279
Sorting nexin-2 OS=Homo sapiens OX=9606 GN=SNX2 PE=1 SV=2	O60749	SNX2	58 kDa	2.4899	1.941	1.28279
HBS1-like protein OS=Homo sapiens OX=9606 GN=HBS1L PE=1 SV=1	Q9Y450	HBS1L	75 kDa	2.4899	1.941	1.28279
Destrin OS=Homo sapiens OX=9606 GN=DSTN PE=1 SV=3	P60981 (+1)	DSTN	19 kDa	2.4899	1.941	1.28279
Protein kinase C and casein kinase substrate in neurons protein 2 (Fragment) OS=Homo sapiens OX=9606 GN=PACSIN2 PE=1 SV=1	A0A0U1RR22 (+1)	PACSIN2	52 kDa	2.4899	1.941	1.28279
DNA-binding protein SMUBP-2 OS=Homo sapiens OX=9606 GN=IGHMBP2 PE=1 SV=3	P38935	IGHMBP2	109 kDa	2.4899	1.941	1.28279
Pescadillo homolog OS=Homo sapiens OX=9606 GN=PES1 PE=1 SV=1	B5MCF9 (+2)	PES1	66 kDa	2.4899	1.941	1.28279
Isoform 13 of Myomegalin OS=Homo sapiens OX=9606 GN=PDE4DIP	Q5VU43-13 (+1)	PDE4DIP	127 kDa	2.4899	1.941	1.28279
Actin-related protein 2/3 complex subunit 4 OS=Homo sapiens OX=9606 GN=ARPC4-TTLL3 PE=3 SV=1	F8WCF6 (+2)	ARPC4-TTLL3	21 kDa	2.4899	1.941	1.28279
Thioredoxin domain-containing protein 5 OS=Homo sapiens OX=9606 GN=TXNDC5 PE=1 SV=2	Q8NBS9 (+1)	TXNDC5	48 kDa	2.4899	1.941	1.28279
40S ribosomal protein S30 OS=Homo sapiens OX=9606 GN=FAU PE=1 SV=1	E9PR30 (+1)	FAU	11 kDa	2.4899	1.941	1.28279
Importin subunit alpha-4 OS=Homo sapiens OX=9606 GN=KPNA3 PE=1 SV=2	O00505	KPNA3	58 kDa	2.4899	1.941	1.28279
Exosome complex component RRP4 OS=Homo sapiens OX=9606 GN=EXOSC2 PE=1 SV=2	Q13868	EXOSC2	33 kDa	2.4899	1.941	1.28279
Serine/arginine repetitive matrix protein 1 OS=Homo sapiens OX=9606 GN=SRRM1 PE=1 SV=1	A9Z1X7 (+4)	SRRM1	103 kDa	2.4899	1.941	1.28279
F-actin-capping protein subunit alpha-1 OS=Homo sapiens OX=9606 GN=CAPZA1 PE=1 SV=3	P52907	CAPZA1	33 kDa	2.4899	1.941	1.28279
Cellular nucleic acid-binding protein OS=Homo sapiens OX=9606 GN=CNBP PE=1 SV=1	P62633 (+3)	CNBP	19 kDa	2.4899	1.941	1.28279
Dickkopf-related protein 1 OS=Homo sapiens OX=9606 GN=DKK1 PE=1 SV=1	O94907	DKK1	29 kDa	2.4899	1.941	1.28279
Ribonucleoside-diphosphate reductase large subunit OS=Homo sapiens OX=9606 GN=RRM1 PE=1 SV=1	P23921	RRM1	90 kDa	2.4899	1.941	1.28279
Splicing factor U2AF 35 kDa subunit-like protein OS=Homo sapiens OX=9606 GN=U2AF1L5 PE=1 SV=1	P0DN76 (+1)	U2AF1L5	28 kDa	2.4899	1.941	1.28279
U2 small nuclear ribonucleoprotein B'' OS=Homo sapiens OX=9606 GN=SNRPB2 PE=1 SV=1	P08579	SNRPB2	25 kDa	2.4899	1.941	1.28279
Hydroxysteroid dehydrogenase-like protein 2 OS=Homo sapiens OX=9606 GN=HSDL2 PE=1 SV=1	Q6YN16	HSDL2	45 kDa	2.4899	1.941	1.28279
Splicing factor U2AF 65 kDa subunit OS=Homo sapiens OX=9606 GN=U2AF2 PE=1 SV=4	P26368 (+1)	U2AF2	54 kDa	2.4899	1.941	1.28279
Periodic tryptophan protein 1 homolog OS=Homo sapiens OX=9606 GN=PWP1 PE=1 SV=1	Q13610	PWP1	56 kDa	2.4899	1.941	1.28279
Ribosomal_L2_C domain-containing protein (Fragment) OS=Homo sapiens OX=9606 PE=4 SV=1	A0A669KAX9 (+1)		26 kDa	2.4899	1.941	1.28279
Actin-related protein 2/3 complex subunit 3 OS=Homo sapiens OX=9606 GN=ARPC3 PE=1 SV=3	O15145	ARPC3	21 kDa	2.4899	1.941	1.28279
Isoform Heart of ATP synthase subunit gamma, mitochondrial OS=Homo sapiens OX=9606 GN=ATP5F1C	P36542-2	ATP5F1C	33 kDa	2.4899	1.941	1.28279
ATP5MF-PTCD1 readthrough OS=Homo sapiens OX=9606 GN=ATP5MF-PTCD1 PE=4 SV=1	G3V325	ATP5MF-PTCD1	84 kDa	2.4899	1.941	1.28279
Dimethyladenosine transferase 1, mitochondrial OS=Homo sapiens OX=9606 GN=TFB1M PE=1 SV=1	Q8WVM0	TFB1M	40 kDa	2.4899	1.941	1.28279
Single-stranded DNA-binding protein, mitochondrial (Fragment) OS=Homo sapiens OX=9606 GN=SSBP1 PE=1 SV=1	A0A0G2JLD8 (+2)	SSBP1	16 kDa	2.4899	1.941	1.28279
Nascent polypeptide-associated complex subunit alpha-2 OS=Homo sapiens OX=9606 GN=NACA2 PE=1 SV=1	Q9H009	NACA2	23 kDa	2.4899	1.941	1.28279
Alpha-taxilin OS=Homo sapiens OX=9606 GN=TXLNA PE=1 SV=3	P40222	TXLNA	62 kDa	9.9596	7.7641	1.28278
Peroxisomal multifunctional enzyme type 2 OS=Homo sapiens OX=9606 GN=HSD17B4 PE=1 SV=3	P51659	HSD17B4	80 kDa	9.9596	7.7641	1.28278
Protein arginine N-methyltransferase 1 OS=Homo sapiens OX=9606 GN=PRMT1 PE=1 SV=1	E9PKG1 (+3)	PRMT1	38 kDa	7.4697	5.8231	1.28277
Guanine nucleotide-binding protein-like 3 OS=Homo sapiens OX=9606 GN=GNL3 PE=1 SV=2	Q9BVP2 (+1)	GNL3	62 kDa	7.4697	5.8231	1.28277
Protein LYRIC OS=Homo sapiens OX=9606 GN=MTDH PE=1 SV=2	Q86UE4	MTDH	64 kDa	7.4697	5.8231	1.28277
AP-1 complex subunit beta-1 OS=Homo sapiens OX=9606 GN=AP1B1 PE=1 SV=2	Q10567 (+3)	AP1B1	105 kDa	7.4697	5.8231	1.28277
RNA transcription, translation and transport factor protein OS=Homo sapiens OX=9606 GN=RTRAF PE=1 SV=1	Q9Y224	RTRAF	28 kDa	7.4697	5.8231	1.28277
Nucleophosmin OS=Homo sapiens OX=9606 GN=NPM1 PE=4 SV=1	A0A7I2V5S2 (+3)	NPM1	34 kDa	7.4697	5.8231	1.28277
60S ribosomal protein L27a OS=Homo sapiens OX=9606 GN=RPL27A PE=1 SV=2	P46776	RPL27A	17 kDa	7.4697	5.8231	1.28277
2'-5'-oligoadenylate synthase 3 OS=Homo sapiens OX=9606 GN=OAS3 PE=1 SV=3	Q9Y6K5	OAS3	121 kDa	7.4697	5.8231	1.28277
60S ribosomal protein L17 (Fragment) OS=Homo sapiens OX=9606 GN=RPL17 PE=1 SV=1	A0A087WXM6 (+5)	RPL17	20 kDa	17.429	13.587	1.28277
Tyrosine-protein phosphatase non-receptor type 1 OS=Homo sapiens OX=9606 GN=PTPN1 PE=1 SV=1	P18031	PTPN1	50 kDa	4.9798	3.8821	1.28276
Solute carrier family 2, facilitated glucose transporter member 3 OS=Homo sapiens OX=9606 GN=SLC2A3 PE=1 SV=1	P11169	SLC2A3	54 kDa	4.9798	3.8821	1.28276
Enhancer of mRNA-decapping protein 4 OS=Homo sapiens OX=9606 GN=EDC4 PE=1 SV=1	Q6P2E9	EDC4	152 kDa	4.9798	3.8821	1.28276
U2 small nuclear ribonucleoprotein A' OS=Homo sapiens OX=9606 GN=SNRPA1 PE=1 SV=2	P09661	SNRPA1	28 kDa	4.9798	3.8821	1.28276
Matrin-3 OS=Homo sapiens OX=9606 GN=MATR3 PE=1 SV=1	A0A0R4J2E8 (+2)	MATR3	95 kDa	4.9798	3.8821	1.28276
Small nuclear ribonucleoprotein-associated protein N (Fragment) OS=Homo sapiens OX=9606 GN=SNRPN PE=1 SV=1	J3QLE5 (+5)	SNRPN	18 kDa	4.9798	3.8821	1.28276
Nascent polypeptide-associated complex subunit alpha OS=Homo sapiens OX=9606 GN=NACA PE=4 SV=1	A0A7I2V2K5 (+6)	NACA	23 kDa	4.9798	3.8821	1.28276
Cell division cycle 2, G1 to S and G2 to M, isoform CRA_a OS=Homo sapiens OX=9606 GN=CDK1 PE=1 SV=1	A0A024QZP7 (+1)	CDK1	34 kDa	4.9798	3.8821	1.28276
Histone H2A OS=Homo sapiens OX=9606 GN=hCG_2039566 PE=3 SV=1	A0A0U1RR32 (+15)	hCG_2039566	18 kDa	4.9798	3.8821	1.28276
APOBEC1 complementation factor OS=Homo sapiens OX=9606 GN=A1CF PE=1 SV=1	Q9NQ94 (+2)	A1CF	65 kDa	4.9798	3.8821	1.28276
Succinate--CoA ligase [ADP/GDP-forming] subunit alpha, mitochondrial OS=Homo sapiens OX=9606 GN=SUCLG1 PE=1 SV=1	A0A494C0D1 (+1)	SUCLG1	22 kDa	4.9798	3.8821	1.28276
3-hydroxyacyl-CoA dehydrogenase type-2 OS=Homo sapiens OX=9606 GN=HSD17B10 PE=1 SV=3	Q99714	HSD17B10	27 kDa	4.9798	3.8821	1.28276
Voltage-dependent anion-selective channel protein 3 OS=Homo sapiens OX=9606 GN=VDAC3 PE=1 SV=1	Q9Y277 (+1)	VDAC3	31 kDa	4.9798	3.8821	1.28276
Unconventional myosin-Id OS=Homo sapiens OX=9606 GN=MYO1D PE=1 SV=1	K7EIG7 (+1)	MYO1D	106 kDa	14.939	11.646	1.28276
Isoform 2 of ATPase family AAA domain-containing protein 3A OS=Homo sapiens OX=9606 GN=ATAD3A	Q9NVI7-2	ATAD3A	66 kDa	14.939	11.646	1.28276
Endoplasmic reticulum chaperone BiP OS=Homo sapiens OX=9606 GN=HSPA5 PE=1 SV=2	P11021	HSPA5	72 kDa	18.259	14.558	1.25422
Talin-1 OS=Homo sapiens OX=9606 GN=TLN1 PE=1 SV=3	Q9Y490	TLN1	270 kDa	15.769	12.617	1.24982
Elongation factor 1-alpha OS=Entamoeba histolytica OX=5759 GN=EHI_052400 PE=2 SV=1	C4MAC9	EHI_052400	48 kDa	15.769	12.617	1.24982
14-3-3 protein beta/alpha OS=Homo sapiens OX=9606 GN=YWHAB PE=1 SV=3	P31946 (+1)	YWHAB	28 kDa	13.28	10.676	1.24391
Eukaryotic translation initiation factor 3 subunit G OS=Homo sapiens OX=9606 GN=EIF3G PE=1 SV=2	O75821	EIF3G	36 kDa	10.79	8.7346	1.23532
60S ribosomal protein L23 OS=Homo sapiens OX=9606 GN=RPL23 PE=1 SV=1	P62829	RPL23	15 kDa	10.79	8.7346	1.23532
Zinc finger CCHC domain-containing protein 3 OS=Homo sapiens OX=9606 GN=ZCCHC3 PE=1 SV=2	Q9NUD5	ZCCHC3	44 kDa	10.79	8.7346	1.23532
Serrate RNA effector molecule homolog OS=Homo sapiens OX=9606 GN=SRRT PE=1 SV=1	Q9BXP5 (+3)	SRRT	101 kDa	21.579	17.469	1.23527
Eukaryotic translation initiation factor 2 subunit 3 OS=Homo sapiens OX=9606 GN=EIF2S3 PE=1 SV=3	P41091	EIF2S3	51 kDa	19.089	15.528	1.22933
Arginine--tRNA ligase, cytoplasmic OS=Homo sapiens OX=9606 GN=RARS1 PE=1 SV=2	P54136	RARS1	75 kDa	8.2997	6.7936	1.22169
Exportin-2 OS=Homo sapiens OX=9606 GN=CSE1L PE=1 SV=3	P55060 (+1)	CSE1L	110 kDa	8.2997	6.7936	1.22169
17-beta-hydroxysteroid dehydrogenase 14 OS=Homo sapiens OX=9606 GN=HSD17B14 PE=1 SV=1	Q9BPX1	HSD17B14	28 kDa	8.2997	6.7936	1.22169
Isoform 2 of N-alpha-acetyltransferase 10 OS=Homo sapiens OX=9606 GN=NAA10	P41227-2	NAA10	25 kDa	8.2997	6.7936	1.22169
SRSF protein kinase 2 OS=Homo sapiens OX=9606 GN=SRPK2 PE=1 SV=3	P78362 (+1)	SRPK2	78 kDa	8.2997	6.7936	1.22169
Isoform 3 of Poly(rC)-binding protein 2 OS=Homo sapiens OX=9606 GN=PCBP2	Q15366-3 (+3)	PCBP2	38 kDa	8.2997	6.7936	1.22169
RNA-binding protein PNO1 OS=Homo sapiens OX=9606 GN=PNO1 PE=1 SV=1	Q9NRX1	PNO1	28 kDa	8.2997	6.7936	1.22169
Ataxin-2-like protein OS=Homo sapiens OX=9606 GN=ATXN2L PE=1 SV=2	Q8WWM7	ATXN2L	113 kDa	25.729	21.351	1.20505
60S ribosomal protein L5 OS=Homo sapiens OX=9606 GN=RPL5 PE=1 SV=3	P46777	RPL5	34 kDa	31.539	26.204	1.20359
Coatomer subunit alpha OS=Homo sapiens OX=9606 GN=COPA PE=1 SV=2	P53621 (+1)	COPA	138 kDa	11.62	9.7052	1.1973
ATP-dependent 6-phosphofructokinase, platelet type OS=Homo sapiens OX=9606 GN=PFKP PE=1 SV=2	Q01813	PFKP	86 kDa	11.62	9.7052	1.1973
Eukaryotic translation initiation factor 3 subunit E OS=Homo sapiens OX=9606 GN=EIF3E PE=4 SV=1	A0A7I2V2H9 (+4)	EIF3E	53 kDa	23.239	19.41	1.19727
Heat shock 70 kDa protein 4 OS=Homo sapiens OX=9606 GN=HSPA4 PE=1 SV=4	P34932	HSPA4	94 kDa	5.8098	4.8526	1.19726
Calpain-1 catalytic subunit OS=Homo sapiens OX=9606 GN=CAPN1 PE=1 SV=1	P07384	CAPN1	82 kDa	5.8098	4.8526	1.19726
4F2 cell-surface antigen heavy chain OS=Homo sapiens OX=9606 GN=SLC3A2 PE=1 SV=1	F5GZS6 (+5)	SLC3A2	65 kDa	5.8098	4.8526	1.19726
40S ribosomal protein S17 OS=Homo sapiens OX=9606 PE=3 SV=2	H3BNC9 (+1)		65 kDa	5.8098	4.8526	1.19726
Calpain inhibitor OS=Homo sapiens OX=9606 GN=CAST PE=1 SV=2	A0A0C4DGB5 (+4)	CAST	80 kDa	5.8098	4.8526	1.19726
TATA-binding protein-associated factor 2N OS=Homo sapiens OX=9606 GN=TAF15 PE=1 SV=1	Q92804 (+1)	TAF15	62 kDa	5.8098	4.8526	1.19726
Pumilio homolog 1 OS=Homo sapiens OX=9606 GN=PUM1 PE=1 SV=3	Q14671 (+1)	PUM1	126 kDa	5.8098	4.8526	1.19726
Protein LTV1 homolog OS=Homo sapiens OX=9606 GN=LTV1 PE=1 SV=1	Q96GA3	LTV1	55 kDa	5.8098	4.8526	1.19726
Serine/threonine-protein phosphatase OS=Homo sapiens OX=9606 GN=PPP1CC PE=1 SV=1	F8VYE8 (+2)	PPP1CC	35 kDa	5.8098	4.8526	1.19726
Importin subunit alpha-1 OS=Homo sapiens OX=9606 GN=KPNA2 PE=4 SV=1	A0A7I2V351 (+3)	KPNA2	55 kDa	5.8098	4.8526	1.19726
Signal recognition particle receptor subunit beta OS=Homo sapiens OX=9606 GN=SRPRB PE=1 SV=3	Q9Y5M8	SRPRB	30 kDa	5.8098	4.8526	1.19726
RNA-binding protein FUS OS=Homo sapiens OX=9606 GN=FUS PE=1 SV=1	H3BPE7 (+2)	FUS	53 kDa	5.8098	4.8526	1.19726
40S ribosomal protein S21 OS=Homo sapiens OX=9606 GN=RPS21 PE=1 SV=1	P63220 (+1)	RPS21	9 kDa	5.8098	4.8526	1.19726
Very-long-chain 3-oxoacyl-CoA reductase OS=Homo sapiens OX=9606 GN=HSD17B12 PE=1 SV=2	Q53GQ0	HSD17B12	34 kDa	5.8098	4.8526	1.19726
14-3-3 protein eta OS=Homo sapiens OX=9606 GN=YWHAH PE=1 SV=4	Q04917	YWHAH	28 kDa	9.1297	7.7641	1.17589
Transportin-1 OS=Homo sapiens OX=9606 GN=TNPO1 PE=1 SV=2	Q92973 (+1)	TNPO1	102 kDa	9.1297	7.7641	1.17589
Protein PRRC2C OS=Homo sapiens OX=9606 GN=PRRC2C PE=1 SV=4	Q9Y520 (+2)	PRRC2C	317 kDa	30.709	26.204	1.17192
Lysine--tRNA ligase OS=Homo sapiens OX=9606 GN=KARS1 PE=1 SV=3	Q15046 (+1)	KARS1	68 kDa	12.45	10.676	1.16617
60S ribosomal protein L6 OS=Homo sapiens OX=9606 GN=RPL6 PE=1 SV=3	Q02878	RPL6	33 kDa	15.769	13.587	1.16059
DNA replication licensing factor MCM6 OS=Homo sapiens OX=9606 GN=MCM6 PE=1 SV=1	Q14566	MCM6	93 kDa	15.769	13.587	1.16059
Thrombospondin-1 OS=Homo sapiens OX=9606 GN=THBS1 PE=1 SV=2	P07996	THBS1	129 kDa	34.859	30.086	1.15865
DNA-dependent protein kinase catalytic subunit OS=Homo sapiens OX=9606 GN=PRKDC PE=1 SV=3	P78527	PRKDC	469 kDa	48.138	41.732	1.1535
60S ribosomal protein L13 OS=Homo sapiens OX=9606 GN=RPL13 PE=1 SV=4	P26373	RPL13	24 kDa	13.28	11.646	1.14031
Nuclear RNA export factor 1 OS=Homo sapiens OX=9606 GN=NXF1 PE=1 SV=1	Q9UBU9	NXF1	70 kDa	3.3199	2.9115	1.14027
Peptidyl-prolyl cis-trans isomerase FKBP4 OS=Homo sapiens OX=9606 GN=FKBP4 PE=1 SV=3	Q02790	FKBP4	52 kDa	3.3199	2.9115	1.14027
Acetyl-CoA acetyltransferase, mitochondrial OS=Homo sapiens OX=9606 GN=ACAT1 PE=1 SV=1	A0A5F9ZHJ7 (+2)	ACAT1	34 kDa	3.3199	2.9115	1.14027
Nicalin OS=Homo sapiens OX=9606 GN=NCLN PE=1 SV=2	Q969V3 (+1)	NCLN	63 kDa	3.3199	2.9115	1.14027
Serine--tRNA ligase, cytoplasmic OS=Homo sapiens OX=9606 GN=SARS1 PE=1 SV=3	P49591 (+1)	SARS1	59 kDa	3.3199	2.9115	1.14027
Vesicular integral-membrane protein VIP36 OS=Homo sapiens OX=9606 GN=LMAN2 PE=1 SV=1	Q12907	LMAN2	40 kDa	3.3199	2.9115	1.14027
Guanine nucleotide binding protein-like 3 (Nucleolar)-like, isoform CRA_b OS=Homo sapiens OX=9606 GN=GNL3L PE=1 SV=1	A0A6I8PS19 (+1)	GNL3L	58 kDa	3.3199	2.9115	1.14027
Proteasome subunit alpha type-5 OS=Homo sapiens OX=9606 GN=PSMA5 PE=1 SV=3	P28066	PSMA5	26 kDa	3.3199	2.9115	1.14027
High mobility group protein B2 OS=Homo sapiens OX=9606 GN=HMGB2 PE=1 SV=2	P26583	HMGB2	24 kDa	3.3199	2.9115	1.14027
Translation initiation factor eIF-2B subunit delta OS=Homo sapiens OX=9606 GN=EIF2B4 PE=1 SV=1	A0A087WTA5 (+2)	EIF2B4	57 kDa	3.3199	2.9115	1.14027
Fatty acid-binding protein 5 OS=Homo sapiens OX=9606 GN=FABP5 PE=1 SV=3	Q01469	FABP5	15 kDa	3.3199	2.9115	1.14027
GTP-binding protein SAR1a OS=Homo sapiens OX=9606 GN=SAR1A PE=1 SV=1	Q9NR31	SAR1A	22 kDa	3.3199	2.9115	1.14027
Transmembrane emp24 domain-containing protein 2 OS=Homo sapiens OX=9606 GN=TMED2 PE=1 SV=1	F5GX39 (+1)	TMED2	14 kDa	3.3199	2.9115	1.14027
Serine/threonine-protein kinase 24 OS=Homo sapiens OX=9606 GN=STK24 PE=1 SV=1	B4DR80 (+2)	STK24	46 kDa	3.3199	2.9115	1.14027
GATOR complex protein SEC13 OS=Homo sapiens OX=9606 GN=SEC13 PE=1 SV=1	A8MXL6 (+4)	SEC13	32 kDa	3.3199	2.9115	1.14027
Centrosomal protein 43 OS=Homo sapiens OX=9606 GN=CEP43 PE=1 SV=1	A0A087WV25 (+2)	CEP43	38 kDa	3.3199	2.9115	1.14027
AP-1 complex subunit gamma-1 OS=Homo sapiens OX=9606 GN=AP1G1 PE=1 SV=5	O43747 (+1)	AP1G1	91 kDa	3.3199	2.9115	1.14027
Solute carrier family 2, facilitated glucose transporter member 1 OS=Homo sapiens OX=9606 GN=SLC2A1 PE=1 SV=2	P11166	SLC2A1	54 kDa	3.3199	2.9115	1.14027
Protein ZNRD2 (Fragment) OS=Homo sapiens OX=9606 GN=ZNRD2 PE=1 SV=1	H0YEB6 (+1)	ZNRD2	21 kDa	3.3199	2.9115	1.14027
39S ribosomal protein L11, mitochondrial OS=Homo sapiens OX=9606 GN=MRPL11 PE=1 SV=1	Q9Y3B7	MRPL11	21 kDa	3.3199	2.9115	1.14027
V-type proton ATPase 116 kDa subunit a1 OS=Homo sapiens OX=9606 GN=ATP6V0A1 PE=1 SV=3	Q93050 (+2)	ATP6V0A1	96 kDa	3.3199	2.9115	1.14027
3-ketoacyl-CoA thiolase, peroxisomal OS=Homo sapiens OX=9606 GN=ACAA1 PE=1 SV=2	P09110	ACAA1	44 kDa	3.3199	2.9115	1.14027
Cell cycle and apoptosis regulator protein 2 OS=Homo sapiens OX=9606 GN=CCAR2 PE=1 SV=2	Q8N163	CCAR2	103 kDa	3.3199	2.9115	1.14027
Phosphoglycerate mutase 1 OS=Homo sapiens OX=9606 GN=PGAM1 PE=1 SV=2	P18669	PGAM1	29 kDa	3.3199	2.9115	1.14027
39S ribosomal protein L1, mitochondrial OS=Homo sapiens OX=9606 GN=MRPL1 PE=1 SV=2	Q9BYD6	MRPL1	37 kDa	3.3199	2.9115	1.14027
RNA-binding protein EWS OS=Homo sapiens OX=9606 GN=EWSR1 PE=1 SV=1	B0QYK0 (+4)	EWSR1	65 kDa	3.3199	2.9115	1.14027
Protein transport protein SEC23 OS=Homo sapiens OX=9606 GN=SEC23B PE=1 SV=1	A0A2R8YFH5 (+1)	SEC23B	84 kDa	3.3199	2.9115	1.14027
ATP-dependent RNA helicase DDX18 OS=Homo sapiens OX=9606 GN=DDX18 PE=1 SV=2	Q9NVP1	DDX18	75 kDa	3.3199	2.9115	1.14027
DNA replication licensing factor MCM2 OS=Homo sapiens OX=9606 GN=MCM2 PE=1 SV=4	P49736	MCM2	102 kDa	6.6398	5.8231	1.14025
Regulator of nonsense transcripts 2 OS=Homo sapiens OX=9606 GN=UPF2 PE=1 SV=1	Q9HAU5	UPF2	148 kDa	6.6398	5.8231	1.14025
Rab GDP dissociation inhibitor beta OS=Homo sapiens OX=9606 GN=GDI2 PE=1 SV=2	P50395	GDI2	51 kDa	6.6398	5.8231	1.14025
Heterogeneous nuclear ribonucleoprotein U-like protein 1 OS=Homo sapiens OX=9606 GN=HNRNPUL1 PE=1 SV=1	A0A0A0MRA5 (+4)	HNRNPUL1	86 kDa	6.6398	5.8231	1.14025
Mitogen-activated protein kinase kinase kinase kinase 4 OS=Homo sapiens OX=9606 GN=MAP4K4 PE=1 SV=1	A0A0D9SEY1 (+9)	MAP4K4	151 kDa	6.6398	5.8231	1.14025
Double-stranded RNA-binding protein Staufen homolog 2 (Fragment) OS=Homo sapiens OX=9606 GN=STAU2 PE=1 SV=1	E5RJN7 (+9)	STAU2	35 kDa	6.6398	5.8231	1.14025
Sickle tail protein homolog OS=Homo sapiens OX=9606 GN=KIAA1217 PE=1 SV=2	Q5T5P2 (+1)	KIAA1217	214 kDa	6.6398	5.8231	1.14025
Uncharacterized protein C7orf50 OS=Homo sapiens OX=9606 GN=C7orf50 PE=1 SV=1	Q9BRJ6	C7orf50	22 kDa	6.6398	5.8231	1.14025
40S ribosomal protein S15 OS=Homo sapiens OX=9606 GN=RPS15 PE=1 SV=1	A0A0B4J2B4 (+5)	RPS15	14 kDa	6.6398	5.8231	1.14025
Histone H4 OS=Homo sapiens OX=9606 GN=H4C1 PE=1 SV=2	P62805	H4C1	11 kDa	6.6398	5.8231	1.14025
Bystin OS=Homo sapiens OX=9606 GN=BYSL PE=1 SV=3	Q13895	BYSL	50 kDa	6.6398	5.8231	1.14025
Microtubule-associated protein RP/EB family member 1 OS=Homo sapiens OX=9606 GN=MAPRE1 PE=1 SV=3	Q15691	MAPRE1	30 kDa	6.6398	5.8231	1.14025
40S ribosomal protein S7 OS=Homo sapiens OX=9606 GN=RPS7 PE=1 SV=1	P62081	RPS7	22 kDa	6.6398	5.8231	1.14025
Aspartate aminotransferase, mitochondrial OS=Homo sapiens OX=9606 GN=GOT2 PE=1 SV=3	P00505	GOT2	48 kDa	6.6398	5.8231	1.14025
Pyruvate dehydrogenase E1 component subunit beta, mitochondrial OS=Homo sapiens OX=9606 GN=PDHB PE=1 SV=3	P11177 (+1)	PDHB	39 kDa	6.6398	5.8231	1.14025
T-complex protein 1 subunit theta OS=Homo sapiens OX=9606 GN=CCT8 PE=1 SV=4	P50990	CCT8	60 kDa	19.919	17.469	1.14025
Endoplasmin OS=Homo sapiens OX=9606 GN=HSP90B1 PE=1 SV=1	P14625	HSP90B1	92 kDa	9.9596	8.7346	1.14025
Src substrate cortactin OS=Homo sapiens OX=9606 GN=CTTN PE=1 SV=2	Q14247	CTTN	62 kDa	9.9596	8.7346	1.14025
40S ribosomal protein S3a OS=Homo sapiens OX=9606 GN=RPS3A PE=1 SV=2	P61247	RPS3A	30 kDa	29.879	26.204	1.14025
Regulator of nonsense transcripts 1 OS=Homo sapiens OX=9606 GN=UPF1 PE=1 SV=2	Q92900 (+1)	UPF1	124 kDa	23.239	20.381	1.14023
T-complex protein 1 subunit epsilon OS=Homo sapiens OX=9606 GN=CCT5 PE=1 SV=1	P48643	CCT5	60 kDa	16.599	14.558	1.1402
Cytoplasmic dynein 1 heavy chain 1 OS=Homo sapiens OX=9606 GN=DYNC1H1 PE=1 SV=5	Q14204	DYNC1H1	532 kDa	40.669	35.909	1.13256
Heterogeneous nuclear ribonucleoprotein U OS=Homo sapiens OX=9606 GN=HNRNPU PE=1 SV=6	Q00839	HNRNPU	91 kDa	20.749	18.44	1.12522
ATP-dependent RNA helicase DDX1 OS=Homo sapiens OX=9606 GN=DDX1 PE=4 SV=1	A0A7I2V430 (+2)	DDX1	78 kDa	20.749	18.44	1.12522
Cold shock domain-containing protein E1 OS=Homo sapiens OX=9606 GN=CSDE1 PE=1 SV=2	O75534 (+1)	CSDE1	89 kDa	17.429	15.528	1.12242
Staphylococcal nuclease domain-containing protein 1 OS=Homo sapiens OX=9606 GN=SND1 PE=1 SV=1	Q7KZF4	SND1	102 kDa	34.859	31.057	1.12242
Heterogeneous nuclear ribonucleoprotein M OS=Homo sapiens OX=9606 GN=HNRNPM PE=1 SV=3	P52272 (+1)	HNRNPM	78 kDa	34.859	31.057	1.12242
40S ribosomal protein S18 OS=Homo sapiens OX=9606 GN=RPS18 PE=1 SV=3	P62269	RPS18	18 kDa	14.11	12.617	1.11833
T-complex protein 1 subunit alpha OS=Homo sapiens OX=9606 GN=TCP1 PE=1 SV=1	P17987	TCP1	60 kDa	10.79	9.7052	1.11178
Ensconsin OS=Homo sapiens OX=9606 GN=MAP7 PE=1 SV=1	Q14244	MAP7	84 kDa	10.79	9.7052	1.11178
Histone H1.5 OS=Homo sapiens OX=9606 GN=H1-5 PE=1 SV=3	P16401	H1-5	23 kDa	10.79	9.7052	1.11178
Cytoskeleton-associated protein 5 OS=Homo sapiens OX=9606 GN=CKAP5 PE=1 SV=3	Q14008 (+1)	CKAP5	226 kDa	21.579	19.41	1.11175
Eukaryotic translation initiation factor 4 gamma 1 OS=Homo sapiens OX=9606 GN=EIF4G1 PE=1 SV=1	E7EUU4 (+1)	EIF4G1	172 kDa	47.308	42.703	1.10784
Double-stranded RNA-binding protein Staufen homolog 1 OS=Homo sapiens OX=9606 GN=STAU1 PE=1 SV=2	O95793 (+2)	STAU1	63 kDa	18.259	16.499	1.10667
Nuclear fragile X mental retardation-interacting protein 2 OS=Homo sapiens OX=9606 GN=NUFIP2 PE=1 SV=1	Q7Z417	NUFIP2	76 kDa	18.259	16.499	1.10667
Nucleolar RNA helicase 2 OS=Homo sapiens OX=9606 GN=DDX21 PE=1 SV=5	Q9NR30	DDX21	87 kDa	18.259	16.499	1.10667
Coatomer subunit gamma-1 OS=Homo sapiens OX=9606 GN=COPG1 PE=1 SV=1	Q9Y678	COPG1	98 kDa	7.4697	6.7936	1.09952
ATP-binding cassette sub-family D member 3 OS=Homo sapiens OX=9606 GN=ABCD3 PE=1 SV=2	A0A3B3ITW3 (+1)	ABCD3	75 kDa	7.4697	6.7936	1.09952
Protein-glutamine gamma-glutamyltransferase 2 OS=Homo sapiens OX=9606 GN=TGM2 PE=1 SV=2	P21980	TGM2	77 kDa	7.4697	6.7936	1.09952
Electron transfer flavoprotein subunit beta OS=Homo sapiens OX=9606 GN=ETFB PE=1 SV=3	P38117	ETFB	28 kDa	7.4697	6.7936	1.09952
Eukaryotic translation initiation factor 3 subunit M OS=Homo sapiens OX=9606 GN=EIF3M PE=1 SV=1	Q7L2H7	EIF3M	43 kDa	7.4697	6.7936	1.09952
Isoform 2 of Tropomyosin alpha-3 chain OS=Homo sapiens OX=9606 GN=TPM3	P06753-2	TPM3	29 kDa	7.4697	6.7936	1.09952
High mobility group protein HMG-I/HMG-Y OS=Homo sapiens OX=9606 GN=HMGA1 PE=1 SV=3	P17096	HMGA1	12 kDa	7.4697	6.7936	1.09952
Prohibitin OS=Homo sapiens OX=9606 GN=PHB PE=1 SV=1	P35232	PHB	30 kDa	7.4697	6.7936	1.09952
Eukaryotic translation initiation factor 5 OS=Homo sapiens OX=9606 GN=EIF5 PE=1 SV=2	P55010	EIF5	49 kDa	14.939	13.587	1.09951
60S ribosomal protein L18 OS=Homo sapiens OX=9606 GN=RPL18 PE=1 SV=1	G3V203 (+1)	RPL18	19 kDa	14.939	13.587	1.09951
Clustered mitochondria protein homolog OS=Homo sapiens OX=9606 GN=CLUH PE=1 SV=1	A0A494C0R8	CLUH	150 kDa	22.409	20.381	1.0995
14-3-3 protein gamma OS=Homo sapiens OX=9606 GN=YWHAG PE=1 SV=2	P61981	YWHAG	28 kDa	11.62	10.676	1.08842
Helicase MOV-10 OS=Homo sapiens OX=9606 GN=MOV10 PE=1 SV=2	Q9HCE1	MOV10	114 kDa	15.769	14.558	1.08318
Ras GTPase-activating-like protein IQGAP1 OS=Homo sapiens OX=9606 GN=IQGAP1 PE=1 SV=1	P46940	IQGAP1	189 kDa	19.919	18.44	1.08021
Ezrin OS=Homo sapiens OX=9606 GN=EZR PE=1 SV=3	E7EQR4 (+1)	EZR	69 kDa	19.919	18.44	1.08021
Stress-70 protein, mitochondrial OS=Homo sapiens OX=9606 GN=HSPA9 PE=1 SV=2	P38646	HSPA9	74 kDa	24.069	22.322	1.07826
Far upstream element-binding protein 3 OS=Homo sapiens OX=9606 GN=FUBP3 PE=1 SV=2	Q96I24	FUBP3	62 kDa	12.45	11.646	1.06904
14-3-3 protein theta OS=Homo sapiens OX=9606 GN=YWHAQ PE=1 SV=1	P27348	YWHAQ	28 kDa	12.45	11.646	1.06904
ATP-dependent RNA helicase A OS=Homo sapiens OX=9606 GN=DHX9 PE=1 SV=4	Q08211	DHX9	141 kDa	24.899	23.292	1.06899
DNA replication licensing factor MCM4 OS=Homo sapiens OX=9606 GN=MCM4 PE=1 SV=5	P33991	MCM4	97 kDa	8.2997	7.7641	1.06898
Peptidyl-prolyl cis-trans isomerase B OS=Homo sapiens OX=9606 GN=PPIB PE=1 SV=2	P23284	PPIB	24 kDa	8.2997	7.7641	1.06898
Protein disulfide-isomerase A6 OS=Homo sapiens OX=9606 GN=PDIA6 PE=1 SV=1	Q15084 (+4)	PDIA6	48 kDa	8.2997	7.7641	1.06898
Elongation factor Tu, mitochondrial OS=Homo sapiens OX=9606 GN=TUFM PE=1 SV=2	P49411	TUFM	50 kDa	8.2997	7.7641	1.06898
Enoyl-CoA hydratase OS=Homo sapiens OX=9606 GN=HADHA PE=1 SV=2	H0YFD6 (+1)	HADHA	86 kDa	8.2997	7.7641	1.06898
Alpha-actinin-1 OS=Homo sapiens OX=9606 GN=ACTN1 PE=1 SV=1	H9KV75 (+4)	ACTN1	95 kDa	8.2997	7.7641	1.06898
Isoform LCRMP-4 of Dihydropyrimidinase-related protein 3 OS=Homo sapiens OX=9606 GN=DPYSL3	Q14195-2	DPYSL3	74 kDa	4.1499	3.8821	1.06898
E3 UFM1-protein ligase 1 OS=Homo sapiens OX=9606 GN=UFL1 PE=1 SV=2	O94874	UFL1	90 kDa	4.1499	3.8821	1.06898
Cytoplasmic FMR1-interacting protein 1 OS=Homo sapiens OX=9606 GN=CYFIP1 PE=1 SV=1	Q7L576	CYFIP1	145 kDa	4.1499	3.8821	1.06898
26S proteasome non-ATPase regulatory subunit 13 OS=Homo sapiens OX=9606 GN=PSMD13 PE=1 SV=2	Q9UNM6 (+1)	PSMD13	43 kDa	4.1499	3.8821	1.06898
Inosine-5'-monophosphate dehydrogenase 2 OS=Homo sapiens OX=9606 GN=IMPDH2 PE=4 SV=1	A0A7I2V2T3 (+2)	IMPDH2	57 kDa	4.1499	3.8821	1.06898
Protein S100-A8 OS=Homo sapiens OX=9606 GN=S100A8 PE=1 SV=1	P05109	S100A8	11 kDa	4.1499	3.8821	1.06898
DNA-(apurinic or apyrimidinic site) endonuclease (Fragment) OS=Homo sapiens OX=9606 GN=APEX1 PE=1 SV=1	G3V3M6 (+1)	APEX1	29 kDa	4.1499	3.8821	1.06898
28 kDa heat- and acid-stable phosphoprotein OS=Homo sapiens OX=9606 GN=PDAP1 PE=1 SV=1	Q13442	PDAP1	21 kDa	4.1499	3.8821	1.06898
Isoform 3 of Nucleoside diphosphate kinase B OS=Homo sapiens OX=9606 GN=NME2	P22392-2 (+1)	NME2	30 kDa	4.1499	3.8821	1.06898
Eukaryotic translation initiation factor 5A (Fragment) OS=Homo sapiens OX=9606 GN=EIF5A PE=1 SV=8	I3L397 (+3)	EIF5A	16 kDa	4.1499	3.8821	1.06898
Protein arginine N-methyltransferase 5 OS=Homo sapiens OX=9606 GN=PRMT5 PE=1 SV=4	O14744 (+1)	PRMT5	73 kDa	4.1499	3.8821	1.06898
Activating signal cointegrator 1 complex subunit 1 OS=Homo sapiens OX=9606 GN=ASCC1 PE=1 SV=1	A0A5F9ZH79 (+1)	ASCC1	37 kDa	4.1499	3.8821	1.06898
Nucleolysin TIA-1 isoform p40 OS=Homo sapiens OX=9606 GN=TIA1 PE=1 SV=1	F8W8I6 (+1)	TIA1	43 kDa	4.1499	3.8821	1.06898
Pre-mRNA-processing factor 19 OS=Homo sapiens OX=9606 GN=PRPF19 PE=1 SV=1	Q9UMS4	PRPF19	55 kDa	4.1499	3.8821	1.06898
Coiled-coil domain-containing protein 9 OS=Homo sapiens OX=9606 GN=CCDC9 PE=1 SV=1	A0A2R8Y4Z8 (+1)	CCDC9	65 kDa	4.1499	3.8821	1.06898
GTP-binding nuclear protein Ran OS=Homo sapiens OX=9606 GN=RAN PE=1 SV=1	B5MDF5 (+2)	RAN	26 kDa	4.1499	3.8821	1.06898
PDZ and LIM domain protein 5 OS=Homo sapiens OX=9606 GN=PDLIM5 PE=1 SV=5	Q96HC4	PDLIM5	64 kDa	4.1499	3.8821	1.06898
Isoform 6 of Amyloid-like protein 2 OS=Homo sapiens OX=9606 GN=APLP2	Q06481-6	APLP2	87 kDa	4.1499	3.8821	1.06898
Alpha-centractin OS=Homo sapiens OX=9606 GN=ACTR1A PE=1 SV=1	P61163	ACTR1A	43 kDa	4.1499	3.8821	1.06898
Nucleolysin TIAR OS=Homo sapiens OX=9606 GN=TIAL1 PE=1 SV=1	Q01085 (+1)	TIAL1	42 kDa	4.1499	3.8821	1.06898
Fatty acid synthase OS=Homo sapiens OX=9606 GN=FASN PE=1 SV=3	P49327	FASN	273 kDa	25.729	24.263	1.06042
Adenosylhomocysteinase OS=Homo sapiens OX=9606 GN=AHCY PE=1 SV=4	P23526	AHCY	48 kDa	17.429	16.499	1.05637
Glyceraldehyde-3-phosphate dehydrogenase OS=Homo sapiens OX=9606 GN=GAPDH PE=1 SV=3	P04406	GAPDH	36 kDa	17.429	16.499	1.05637
60S ribosomal protein L7 OS=Homo sapiens OX=9606 GN=RPL7 PE=1 SV=1	P18124	RPL7	29 kDa	30.709	29.115	1.05475
Isoform 2 of Heat shock protein HSP 90-alpha OS=Homo sapiens OX=9606 GN=HSP90AA1	P07900-2	HSP90AA1	98 kDa	22.409	21.351	1.04955
Filamin-B OS=Homo sapiens OX=9606 GN=FLNB PE=1 SV=2	O75369 (+3)	FLNB	278 kDa	31.539	30.086	1.04829
Isoform 3 of Polyadenylate-binding protein 4 OS=Homo sapiens OX=9606 GN=PABPC4	Q13310-3	PABPC4	72 kDa	31.539	30.086	1.04829
ATP-dependent DNA/RNA helicase DHX36 OS=Homo sapiens OX=9606 GN=DHX36 PE=1 SV=2	Q9H2U1 (+2)	DHX36	115 kDa	9.1297	8.7346	1.04523
Leucine-rich repeat-containing protein 59 OS=Homo sapiens OX=9606 GN=LRRC59 PE=1 SV=1	Q96AG4	LRRC59	35 kDa	9.1297	8.7346	1.04523
Eukaryotic peptide chain release factor subunit 1 OS=Homo sapiens OX=9606 GN=ETF1 PE=1 SV=3	P62495	ETF1	49 kDa	9.1297	8.7346	1.04523
Serine/arginine-rich splicing factor 3 OS=Homo sapiens OX=9606 GN=SRSF3 PE=1 SV=1	P84103 (+1)	SRSF3	19 kDa	9.1297	8.7346	1.04523
DnaJ homolog subfamily C member 2 OS=Homo sapiens OX=9606 GN=DNAJC2 PE=1 SV=4	Q99543	DNAJC2	72 kDa	9.1297	8.7346	1.04523
Proliferation-associated protein 2G4 OS=Homo sapiens OX=9606 GN=PA2G4 PE=1 SV=3	Q9UQ80	PA2G4	44 kDa	18.259	17.469	1.04522
40S ribosomal protein S5 OS=Homo sapiens OX=9606 GN=RPS5 PE=1 SV=1	M0R0R2 (+1)	RPS5	25 kDa	14.11	13.587	1.03849
Insulin-like growth factor 2 mRNA-binding protein 2 OS=Homo sapiens OX=9606 GN=IGF2BP2 PE=1 SV=1	F8W930 (+2)	IGF2BP2	67 kDa	19.089	18.44	1.0352
Bifunctional glutamate/proline--tRNA ligase OS=Homo sapiens OX=9606 GN=EPRS1 PE=1 SV=5	P07814	EPRS1	171 kDa	19.919	19.41	1.02622
cAMP-dependent protein kinase type II-alpha regulatory subunit OS=Homo sapiens OX=9606 GN=PRKAR2A PE=1 SV=2	P13861	PRKAR2A	46 kDa	19.919	19.41	1.02622
Aspartate carbamoyltransferase OS=Homo sapiens OX=9606 GN=CAD PE=1 SV=1	F8VPD4 (+1)	CAD	236 kDa	4.9798	4.8526	1.02621
26S proteasome non-ATPase regulatory subunit 2 OS=Homo sapiens OX=9606 GN=PSMD2 PE=1 SV=3	Q13200	PSMD2	100 kDa	4.9798	4.8526	1.02621
E3 ubiquitin-protein ligase TRIM56 OS=Homo sapiens OX=9606 GN=TRIM56 PE=1 SV=3	Q9BRZ2	TRIM56	81 kDa	4.9798	4.8526	1.02621
Putative ATP-dependent RNA helicase DHX57 OS=Homo sapiens OX=9606 GN=DHX57 PE=1 SV=2	Q6P158	DHX57	156 kDa	4.9798	4.8526	1.02621
Nucleoporin Nup37 OS=Homo sapiens OX=9606 GN=NUP37 PE=1 SV=1	Q8NFH4	NUP37	37 kDa	4.9798	4.8526	1.02621
Apoptosis inhibitor 5 OS=Homo sapiens OX=9606 GN=API5 PE=1 SV=1	G3V1C3 (+2)	API5	58 kDa	4.9798	4.8526	1.02621
High mobility group protein HMGI-C OS=Homo sapiens OX=9606 GN=HMGA2 PE=1 SV=1	P52926	HMGA2	12 kDa	4.9798	4.8526	1.02621
Non-histone chromosomal protein HMG-14 OS=Homo sapiens OX=9606 GN=HMGN1 PE=1 SV=3	P05114	HMGN1	11 kDa	4.9798	4.8526	1.02621
KH domain-containing, RNA-binding, signal transduction-associated protein 1 OS=Homo sapiens OX=9606 GN=KHDRBS1 PE=1 SV=1	Q07666	KHDRBS1	48 kDa	4.9798	4.8526	1.02621
60 kDa poly(U)-binding-splicing factor (Fragment) OS=Homo sapiens OX=9606 GN=PUF60 PE=1 SV=1	A0A0J9YVP6 (+9)	PUF60	57 kDa	4.9798	4.8526	1.02621
Phenylalanine--tRNA ligase beta subunit OS=Homo sapiens OX=9606 GN=FARSB PE=1 SV=3	Q9NSD9	FARSB	66 kDa	9.9596	9.7052	1.02621
14-3-3 protein zeta/delta OS=Homo sapiens OX=9606 GN=YWHAZ PE=1 SV=1	P63104	YWHAZ	28 kDa	9.9596	9.7052	1.02621
60S ribosomal protein L15 OS=Homo sapiens OX=9606 GN=RPL15 PE=1 SV=2	P61313	RPL15	24 kDa	9.9596	9.7052	1.02621
E3 ubiquitin-protein ligase ZNF598 OS=Homo sapiens OX=9606 GN=ZNF598 PE=1 SV=1	Q86UK7 (+2)	ZNF598	99 kDa	9.9596	9.7052	1.02621
Y-box-binding protein 1 OS=Homo sapiens OX=9606 GN=YBX1 PE=1 SV=3	P67809	YBX1	36 kDa	14.939	14.558	1.02617
Eukaryotic translation initiation factor 4 gamma 2 (Fragment) OS=Homo sapiens OX=9606 GN=EIF4G2 PE=1 SV=1	D3DQV9 (+1)	EIF4G2	102 kDa	25.729	25.233	1.01966
N-alpha-acetyltransferase 15, NatA auxiliary subunit OS=Homo sapiens OX=9606 GN=NAA15 PE=1 SV=1	Q9BXJ9	NAA15	101 kDa	20.749	20.381	1.01806
Protein disulfide-isomerase A3 OS=Homo sapiens OX=9606 GN=PDIA3 PE=1 SV=4	P30101	PDIA3	57 kDa	15.769	15.528	1.01552
40S ribosomal protein S10 OS=Homo sapiens OX=9606 GN=RPS10 PE=1 SV=1	P46783	RPS10	19 kDa	15.769	15.528	1.01552
ATP synthase subunit alpha, mitochondrial OS=Homo sapiens OX=9606 GN=ATP5F1A PE=1 SV=1	P25705	ATP5F1A	60 kDa	15.769	15.528	1.01552
Cytosol aminopeptidase OS=Homo sapiens OX=9606 GN=LAP3 PE=1 SV=3	P28838 (+1)	LAP3	56 kDa	10.79	10.676	1.01068
Developmentally-regulated GTP-binding protein 1 OS=Homo sapiens OX=9606 GN=DRG1 PE=1 SV=1	Q9Y295	DRG1	41 kDa	10.79	10.676	1.01068
Stress-induced-phosphoprotein 1 OS=Homo sapiens OX=9606 GN=STIP1 PE=1 SV=1	P31948 (+1)	STIP1	63 kDa	10.79	10.676	1.01068
Eukaryotic translation initiation factor 3 subunit H OS=Homo sapiens OX=9606 GN=EIF3H PE=1 SV=1	B3KS98 (+1)	EIF3H	42 kDa	10.79	10.676	1.01068
60S ribosomal protein L18a OS=Homo sapiens OX=9606 GN=RPL18A PE=1 SV=1	M0R117 (+1)	RPL18A	18 kDa	10.79	10.676	1.01068
Serpin H1 OS=Homo sapiens OX=9606 GN=SERPINH1 PE=1 SV=2	P50454	SERPINH1	46 kDa	10.79	10.676	1.01068
Ubiquitin carboxyl-terminal hydrolase 10 OS=Homo sapiens OX=9606 GN=USP10 PE=1 SV=2	Q14694 (+2)	USP10	87 kDa	10.79	10.676	1.01068
Ubiquitin-associated protein 2 OS=Homo sapiens OX=9606 GN=UBAP2 PE=1 SV=1	Q5T6F2	UBAP2	117 kDa	10.79	10.676	1.01068
RNA-binding protein NOB1 OS=Homo sapiens OX=9606 GN=NOB1 PE=1 SV=1	Q9ULX3	NOB1	47 kDa	10.79	10.676	1.01068
Eukaryotic translation initiation factor 3 subunit B OS=Homo sapiens OX=9606 GN=EIF3B PE=1 SV=3	P55884 (+1)	EIF3B	92 kDa	27.389	27.174	1.00791
RNA helicase OS=Homo sapiens OX=9606 GN=DDX17 PE=1 SV=1	A0A1X7SBZ2 (+2)	DDX17	80 kDa	16.599	16.499	1.00606
Heterogeneous nuclear ribonucleoproteins A2/B1 OS=Homo sapiens OX=9606 GN=HNRNPA2B1 PE=1 SV=2	P22626	HNRNPA2B1	37 kDa	22.409	22.322	1.0039
Echinoderm microtubule-associated protein-like 4 OS=Homo sapiens OX=9606 GN=EML4 PE=1 SV=3	B5MBZ0 (+1)	EML4	110 kDa	11.62	11.646	0.997767
Alpha-enolase OS=Homo sapiens OX=9606 GN=ENO1 PE=1 SV=2	P06733	ENO1	47 kDa	11.62	11.646	0.997767
60S acidic ribosomal protein P0 OS=Homo sapiens OX=9606 GN=RPLP0 PE=1 SV=1	P05388	RPLP0	34 kDa	11.62	11.646	0.997767
Poly(rC)-binding protein 1 OS=Homo sapiens OX=9606 GN=PCBP1 PE=1 SV=2	Q15365	PCBP1	37 kDa	11.62	11.646	0.997767
Serine-threonine kinase receptor-associated protein OS=Homo sapiens OX=9606 GN=STRAP PE=1 SV=1	Q9Y3F4	STRAP	38 kDa	11.62	11.646	0.997767
T-complex protein 1 subunit zeta OS=Homo sapiens OX=9606 GN=CCT6A PE=1 SV=3	P40227	CCT6A	58 kDa	11.62	11.646	0.997767
Fructose-bisphosphate aldolase A OS=Homo sapiens OX=9606 GN=ALDOA PE=1 SV=2	P04075	ALDOA	39 kDa	5.8098	5.8231	0.997716
Isoform 2 of ATP-dependent RNA helicase DHX30 OS=Homo sapiens OX=9606 GN=DHX30	Q7L2E3-2	DHX30	136 kDa	5.8098	5.8231	0.997716
Serine hydroxymethyltransferase, mitochondrial OS=Homo sapiens OX=9606 GN=SHMT2 PE=1 SV=3	P34897 (+1)	SHMT2	56 kDa	5.8098	5.8231	0.997716
Serine/threonine-protein phosphatase PP1-alpha catalytic subunit OS=Homo sapiens OX=9606 GN=PPP1CA PE=1 SV=1	P62136	PPP1CA	38 kDa	5.8098	5.8231	0.997716
Kinesin-like protein OS=Homo sapiens OX=9606 GN=KIF2A PE=1 SV=1	A0A6Q8PFA6 (+2)	KIF2A	78 kDa	5.8098	5.8231	0.997716
Ras-related protein Rab-5C OS=Homo sapiens OX=9606 GN=RAB5C PE=1 SV=2	P51148 (+1)	RAB5C	23 kDa	5.8098	5.8231	0.997716
3-ketoacyl-CoA thiolase, mitochondrial OS=Homo sapiens OX=9606 GN=ACAA2 PE=1 SV=2	P42765	ACAA2	42 kDa	5.8098	5.8231	0.997716
Phosphate carrier protein, mitochondrial OS=Homo sapiens OX=9606 GN=SLC25A3 PE=1 SV=2	Q00325 (+1)	SLC25A3	40 kDa	5.8098	5.8231	0.997716
ATP-dependent RNA helicase DHX29 OS=Homo sapiens OX=9606 GN=DHX29 PE=1 SV=1	A0A087WYN9 (+1)	DHX29	155 kDa	18.259	18.44	0.990184
T-complex protein 1 subunit beta OS=Homo sapiens OX=9606 GN=CCT2 PE=1 SV=4	P78371	CCT2	57 kDa	12.45	12.617	0.986764
Elongation factor 1-delta OS=Homo sapiens OX=9606 GN=EEF1D PE=1 SV=1	E9PRY8 (+2)	EEF1D	77 kDa	13.28	13.587	0.977405
[truncated: 598 more rows]

## Sheet: Trial 3
Table S4. HA-KERP2 interactome in Caco-2
Trial 3
[truncated: 1,845 more rows]
